# Supplementary material for: A team of heterochromatin factors collaborates with small RNA pathways to combat repetitive elements and germline stress
Source: eLife journal article supplement (doi:10.7554/elife.21666), 2017-03-15

Figure 6-figure supplement 1

A

|              | piRNAs       |                      | 22G RNAs near piRNA target sites |                       |
|--------------|--------------|----------------------|----------------------------------|-----------------------|
|              | piRNA number | repeats hit by piRNA | all 22G                          | Repeat associated 22G |
| WT           | 2853         | 4673                 | 10237                            | 3847                  |
| <i>prg-1</i> | 36           | 53                   | 5932                             | 2074                  |
| WT           | 3561         | 7852                 | 7388                             | 2522                  |
| <i>hpl-2</i> | 4282         | 10279                | 8011                             | 2389                  |

B

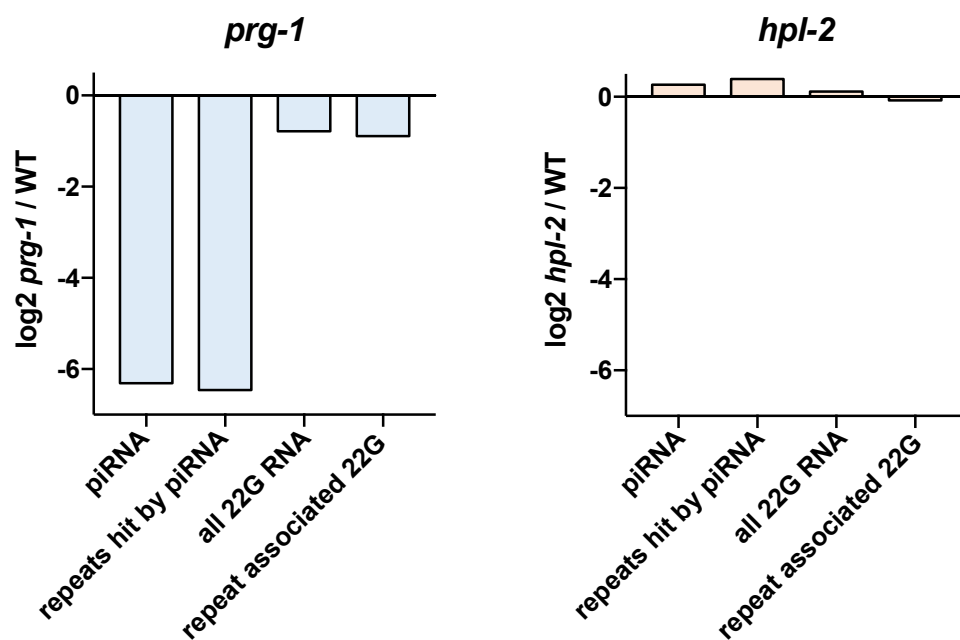

Supplement: supp [file elife-21666-supp-v1.zip]
