# Supplementary material for: A team of heterochromatin factors collaborates with small RNA pathways to combat repetitive elements and germline stress
Source: eLife journal article supplement (doi:10.7554/elife.21666), 2017-03-15
Supplement: supp [file elife-21666-supp-v1.zip]

Figure 2-figure supplement 1

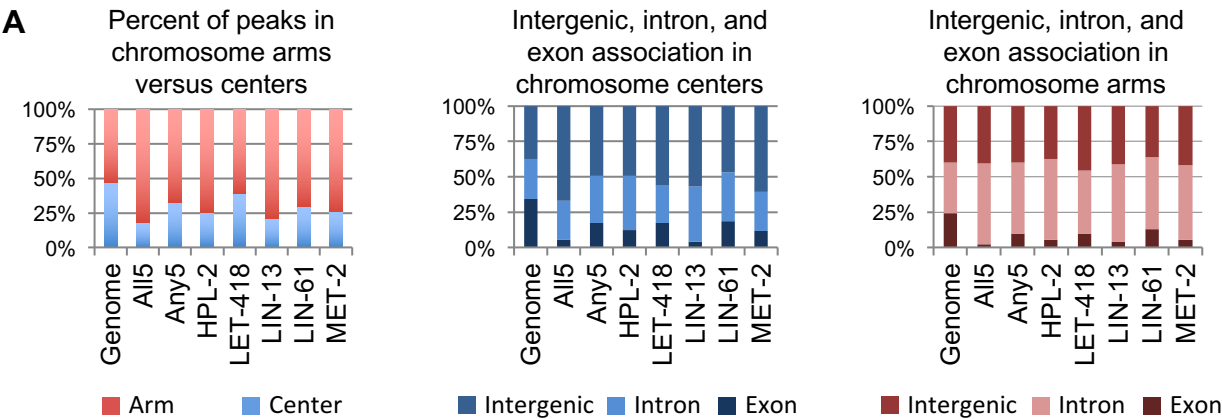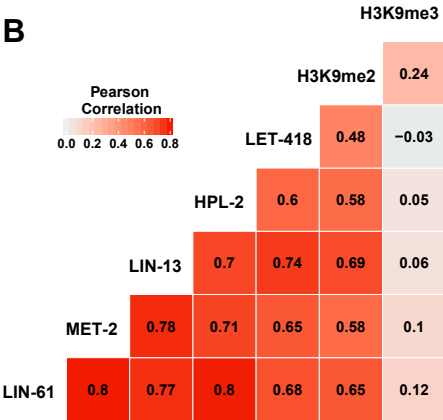

**C**

Factor overlaps in combined ALL 5 peak calls

| Dataset | Total Number of Peaks | Number (%) unique to dataset | Number (%) overlapping repeats |
|---------|-----------------------|------------------------------|--------------------------------|
| HPL-2   | 14224                 | 2470 (17.4 %)                | 9497 (66.8%)                   |
| LET-418 | 16095                 | 4402 (27.4%)                 | 7452 (46.3%)                   |
| LIN-13  | 19313                 | 4106 (21.3%)                 | 13708 (71.0%)                  |
| LIN-61  | 17879                 | 2519 (14.1%)                 | 10634 (59.5%)                  |
| MET-2   | 12449                 | 419 (3.4%)                   | 8219 (66.0%)                   |
| Any5    | 33301                 | NA                           | 17932 (53.8%)                  |
| All5    | 4810                  | NA                           | 3683 (76.6%)                   |

**D**

Numbers of repeats bound by heterochromatin factors (n=62331 repeats)

| Factor  | Number (%) of repeats with factor bound |
|---------|-----------------------------------------|
| HPL-2   | 17026 (27.3%)                           |
| LET-418 | 15931 (25.6%)                           |
| LIN-13  | 22213 (35.6%)                           |
| LIN-61  | 20026 (32.1%)                           |
| MET-2   | 13779 (22.1%)                           |
| Any     | 28974 (46.5%)                           |
| All     | 8002 (12.8%)                            |

**E**

Enrichment of factors at telomeres

| Factor  | Enrichment | p-value  |
|---------|------------|----------|
| H3K9me2 | 20.0       | 0.007922 |
| H3K9me3 | 0.9        | ~1       |
| HPL-2   | 4.2        | 0.01901  |
| LET-418 | 3.5        | 0.01305  |
| LIN-13  | 11.3       | 0.007922 |
| LIN-61  | 5.3        | 0.01073  |
| MET-2   | 14.3       | 0.007922 |
