# Supplementary material for: A team of heterochromatin factors collaborates with small RNA pathways to combat repetitive elements and germline stress
Source: eLife journal article supplement (doi:10.7554/elife.21666), 2017-03-15
Supplement: supp [file elife-21666-supp-v1.zip]

Archive with 26 entries (26 files):
- elife_poa_e21666_Figure_3_figure_supplement_3.pdf
- elife_poa_e21666_Figure_3_source_data_3.xlsx
- elife_poa_e21666_Figure_2_figure_supplement_1.pdf
- elife_poa_e21666_Figure_2_figure_supplement_6.pdf
- elife_poa_e21666_Figure_2_figure_supplement_2.pdf
- elife_poa_e21666_Figure_7_figure_supplement_2.pdf
- elife_poa_e21666_Supplementary_File_1.xlsx
- elife_poa_e21666_Figure_2_figure_supplement_4.pdf
- elife_poa_e21666_Figure_2_source_data_2.xlsx
- elife_poa_e21666_Figure_6_figure_supplement_1.pdf
- elife_poa_e21666_Figure_2_source_data_1.xlsx
- elife_poa_e21666_Figure_3_figure_supplement_1.pdf
- elife_poa_e21666_Figure_2_figure_supplement_3.pdf
- elife_poa_e21666_Figure_5_figure_supplement_1.pdf
- elife_poa_e21666_Figure_3_source_data_2.xlsx
- elife_poa_e21666_Supplementary_File_3.xlsx
- elife_poa_e21666_Figure_2_figure_supplement_8.pdf
- elife_poa_e21666_Supplementary_File_2.xlsx
- elife_poa_e21666_Figure_2_source_data_3.xls
- elife_poa_e21666_Figure_7_figure_supplement_3.pdf
- elife_poa_e21666_Figure_7_figure_supplement_1.pdf
- elife_poa_e21666_Figure_2_figure_supplement_5.pdf
- elife_poa_e21666_Figure_3_source_data_1.xlsx
- elife_poa_e21666_Figure_2_figure_supplement_7.pdf
- elife_poa_e21666_Figure_1_figure_supplement_1.pdf
- elife_poa_e21666_Figure_3_figure_supplement_2.pdf
