# Supplementary material for: A team of heterochromatin factors collaborates with small RNA pathways to combat repetitive elements and germline stress
Source: eLife journal article supplement (doi:10.7554/elife.21666), 2017-03-15
Supplement: supp [file elife-21666-supp-v1.zip]

Enrichment of MET-2 at repeat families

Family

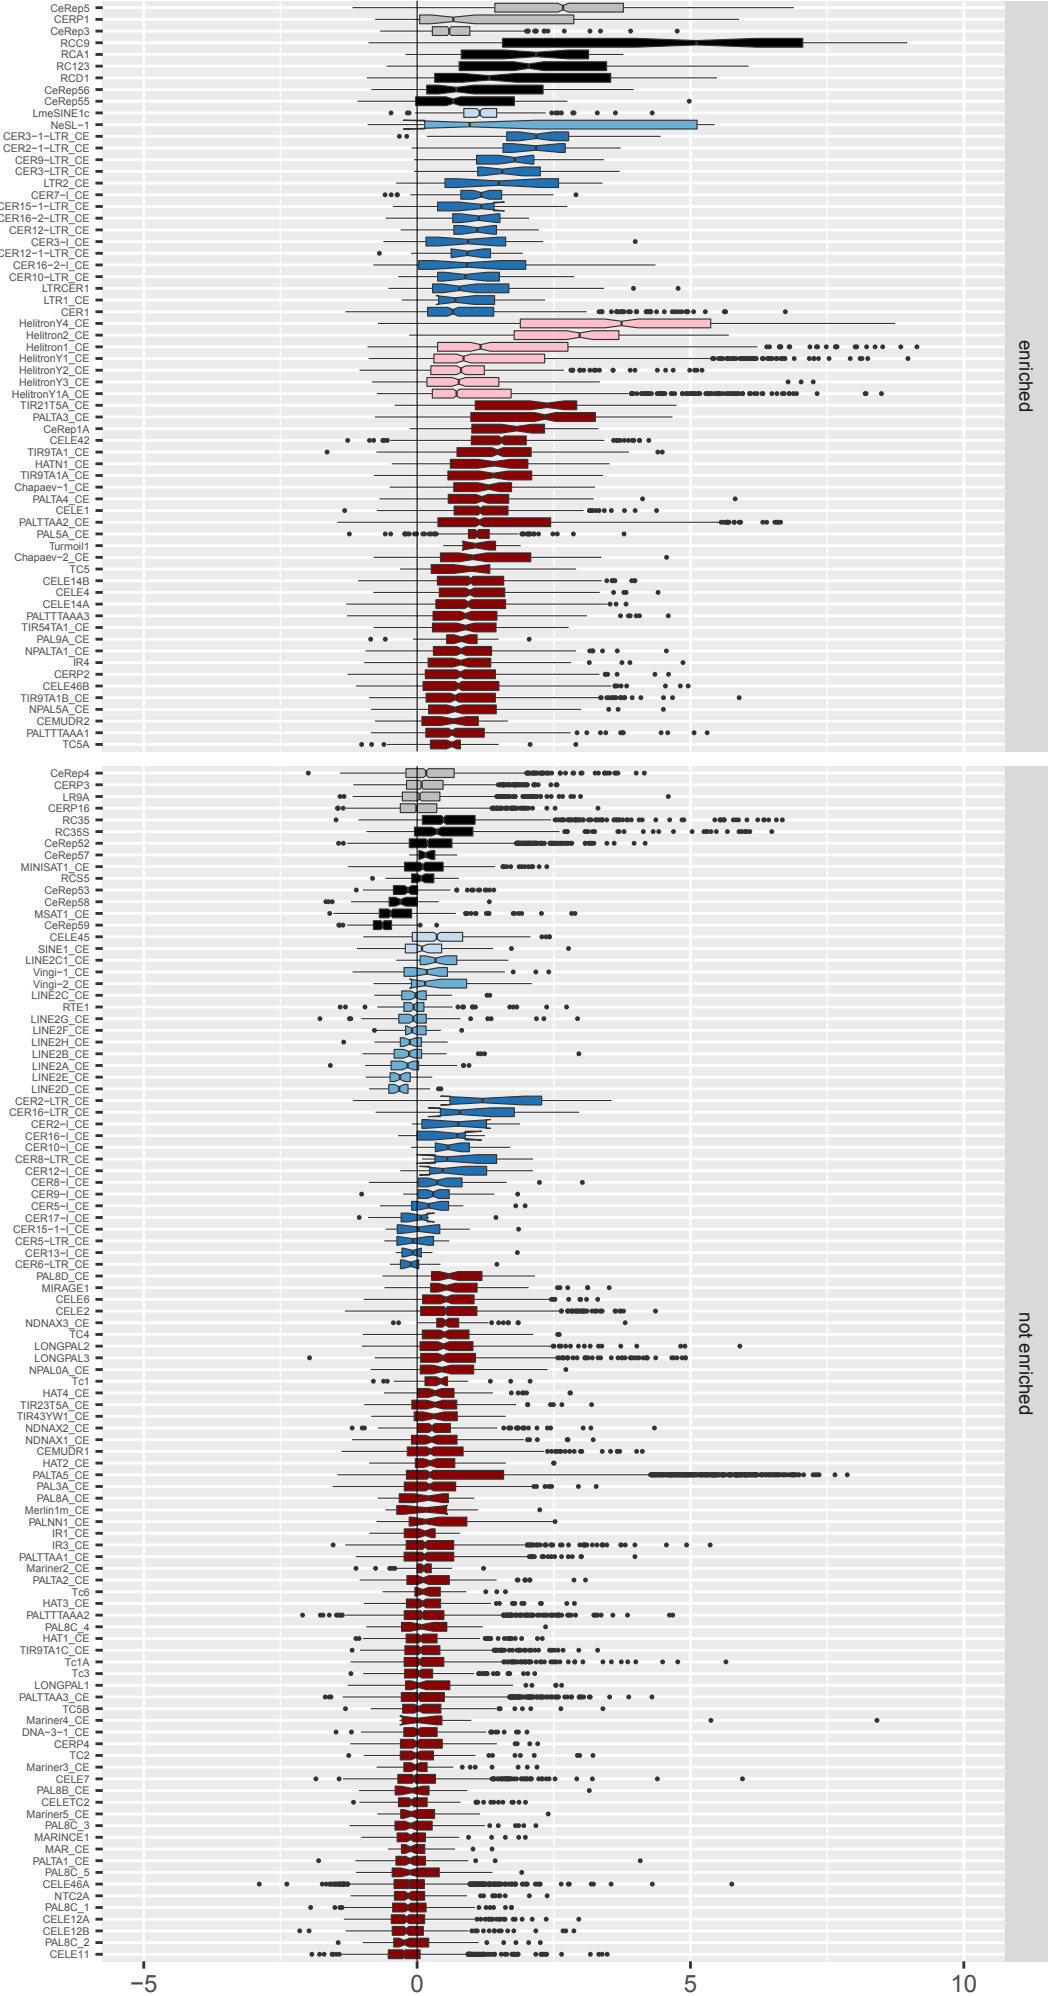

Class

- Cut\_and\_Paste
- Helitron
- LTR
- LINE
- SINE
- Satellite
- Unknown
