# Supplementary material for: A team of heterochromatin factors collaborates with small RNA pathways to combat repetitive elements and germline stress
Source: eLife journal article supplement (doi:10.7554/elife.21666), 2017-03-15

Figure 1 - figure supplement 1

A

|                          | % with abnormal oocytes | % disintegrated germline |
|--------------------------|-------------------------|--------------------------|
| WT (57)                  | 5.3                     | 0.0                      |
| <i>hpl-2</i> (75)        | 18.7                    | 9.3                      |
| <i>let-418</i> (83)      | 20.5                    | 2.4                      |
| <i>lin-13</i> (51)       | 15.7                    | 3.9                      |
| <i>lin-61</i> (76)       | 19.7                    | 0.0                      |
| <i>met-2 set-25</i> (47) | 17.0                    | 10.6                     |
| <i>prg-1</i> (50)        | 26.0                    | 4.0                      |

B

healthy germline

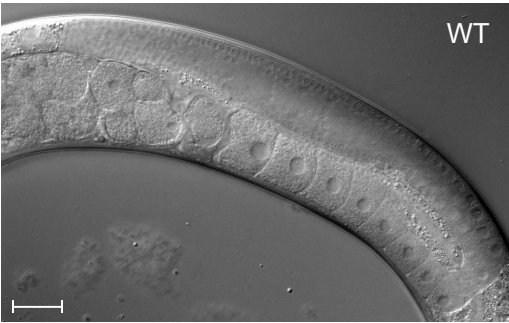

C

Abnormal oocytes in heterochromatin mutants

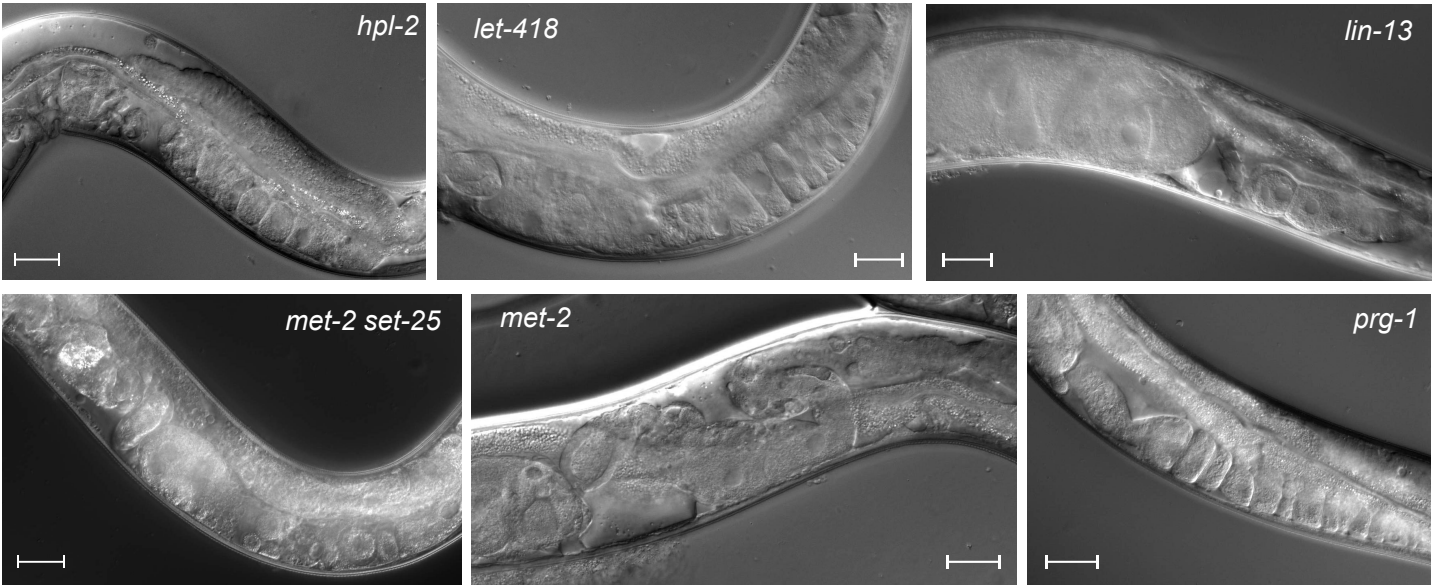

Supplement: supp [file elife-21666-supp-v1.zip › elife_poa_e21666_Figure_1_figure_supplement_1.pdf]
