# Supplementary material for: A team of heterochromatin factors collaborates with small RNA pathways to combat repetitive elements and germline stress
Source: eLife journal article supplement (doi:10.7554/elife.21666), 2017-03-15
Supplement: supp [file elife-21666-supp-v1.zip › elife_poa_e21666_Figure_2_figure_supplement_3.pdf]

Enrichment of LIN-61 at repeat families

Family

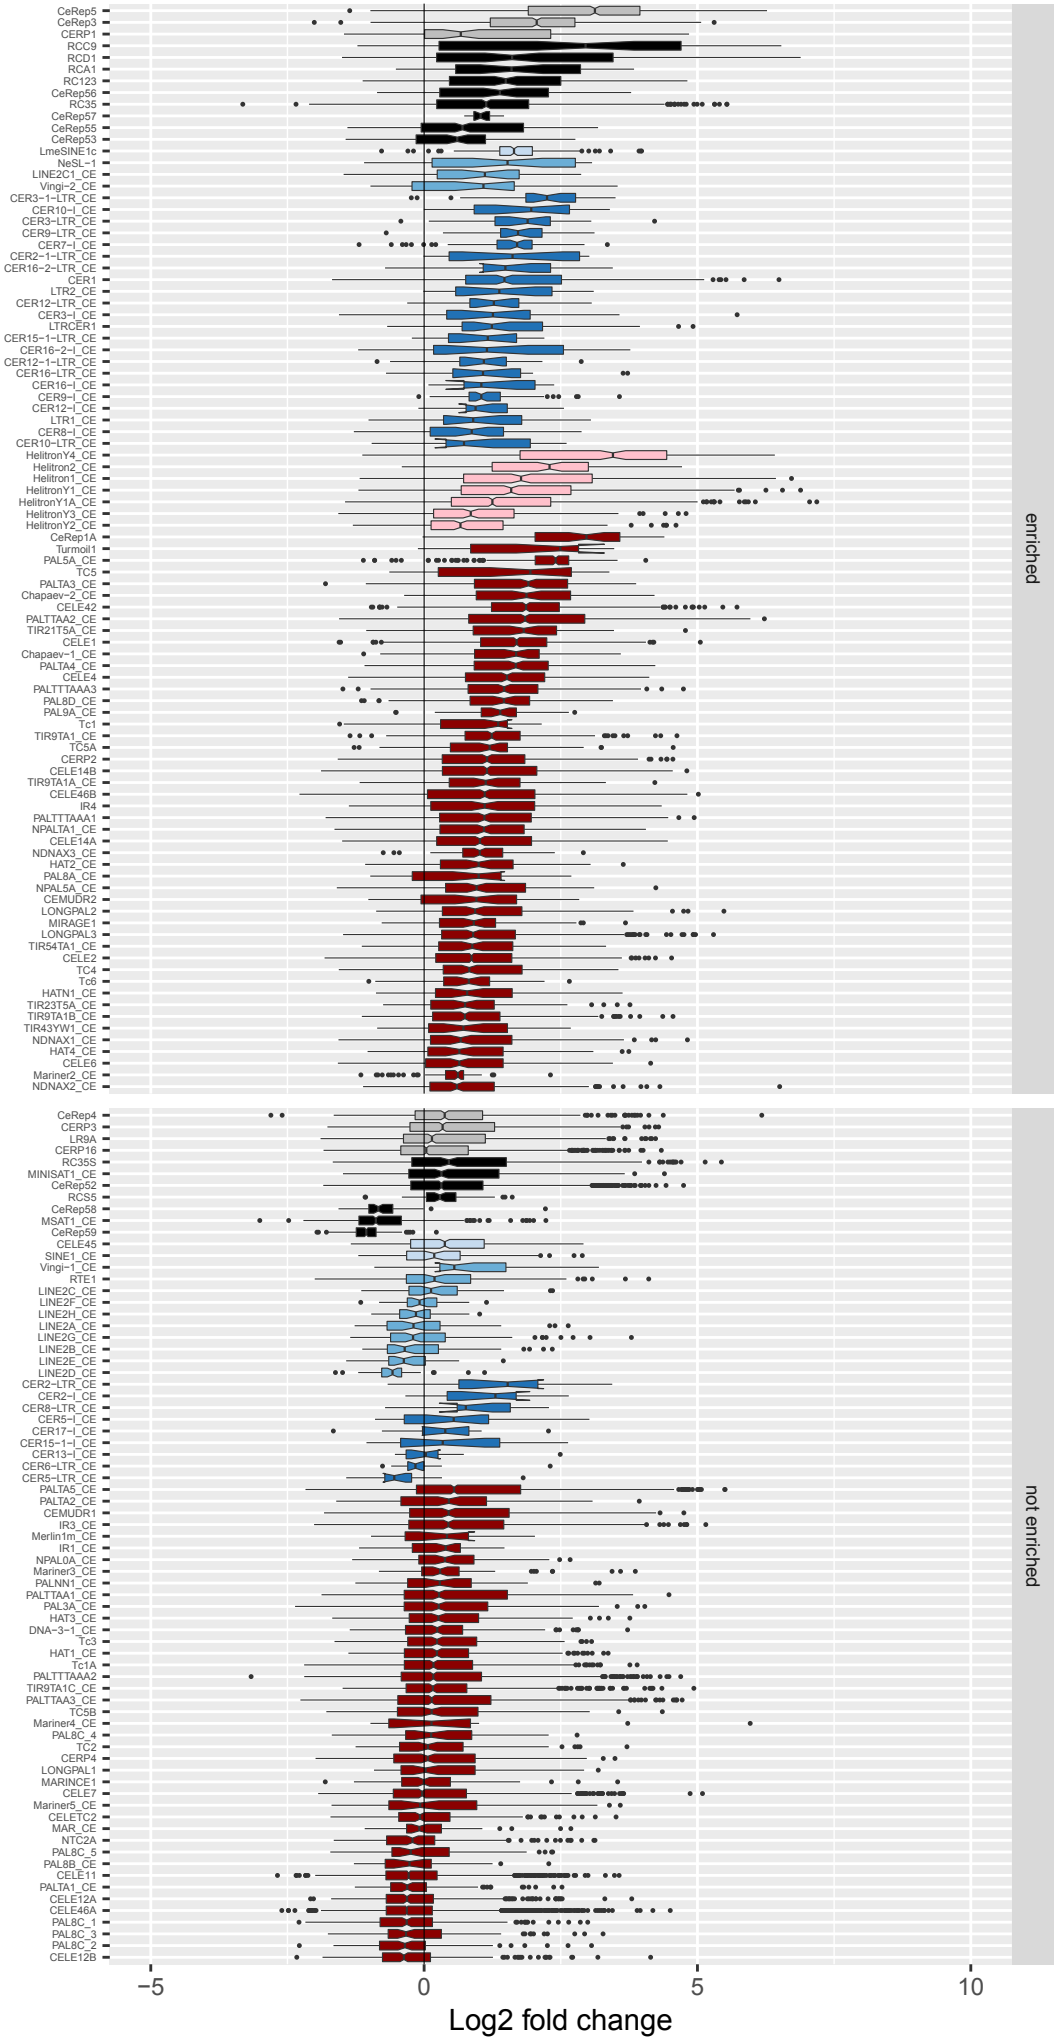

Class

- Cut\_and\_Paste
- Helitron
- LTR
- LINE
- SINE
- Satellite
- Unknown
