# Supplementary material for: A team of heterochromatin factors collaborates with small RNA pathways to combat repetitive elements and germline stress
Source: eLife journal article supplement (doi:10.7554/elife.21666), 2017-03-15
Supplement: supp [file elife-21666-supp-v1.zip › elife_poa_e21666_Figure_2_source_data_2.xlsx]

## Sheet: Legend
Figure 2-source data 2. Enrichment of factors at repeat families
Each tab contains a list of Dfam 2.0 repeat families significantly enriched for factor binding based on BEADS score (family size>=10, fold change>1.5, p<0.1).
Repeat type and family is given, together with the log2 BEADs score and p-value for enrichment.
The last tab ("Compiled") lists all repeat families that are enriched for any factor and indicates which factors are enriched for each of these families.

## Sheet: HPL-2
Factor	Family	Class	log2 BEADS score	p-value
HPL-2	CELE1	Cut_and_Paste	1.69764	9.02565e-208
HPL-2	CELE14A	Cut_and_Paste	1.47856	1.00717e-146
HPL-2	CELE14B	Cut_and_Paste	1.60717	2.30633e-298
HPL-2	CELE2	Cut_and_Paste	0.850175	0
HPL-2	CELE4	Cut_and_Paste	1.28497	3.33106e-79
HPL-2	CELE42	Cut_and_Paste	1.60452	1.20577e-153
HPL-2	CELE46B	Cut_and_Paste	1.22594	1.53117e-139
HPL-2	CELE6	Cut_and_Paste	0.874882	4.64859e-20
HPL-2	CEMUDR2	Cut_and_Paste	0.667416	0.00471564
HPL-2	CER1	LTR	1.27768	3.263e-50
HPL-2	CER10-I_CE	LTR	0.995712	0.0101967
HPL-2	CER10-LTR_CE	LTR	1.11158	0.0139756
HPL-2	CER2-1-LTR_CE	LTR	0.842955	0.00875854
HPL-2	CER3-1-LTR_CE	LTR	1.58484	2.35386e-06
HPL-2	CER3-I_CE	LTR	0.86148	0.000358582
HPL-2	CER3-LTR_CE	LTR	1.01889	0.000609756
HPL-2	CER7-I_CE	LTR	0.585588	0.00323454
HPL-2	CER8-I_CE	LTR	0.735486	5.19397e-06
HPL-2	CER9-I_CE	LTR	0.899397	1.96318e-11
HPL-2	CeRep1A	Cut_and_Paste	1.89429	5.33976e-09
HPL-2	CeRep3	Unknown	2.47171	9.55806e-147
HPL-2	CeRep5	Unknown	3.60572	1.47149e-222
HPL-2	CeRep53	Satellite	1.03463	4.29697e-16
HPL-2	CeRep57	Satellite	1.39751	0.000188828
HPL-2	CERP2	Cut_and_Paste	1.08064	6.46057e-87
HPL-2	Chapaev-1_CE	Cut_and_Paste	1.40372	1.97704e-10
HPL-2	Chapaev-2_CE	Cut_and_Paste	1.50505	8.51768e-17
HPL-2	HAT2_CE	Cut_and_Paste	0.916515	1.16301e-10
HPL-2	Helitron1_CE	Helitron	1.47719	5.40503e-62
HPL-2	Helitron2_CE	Helitron	1.62998	6.89263e-22
HPL-2	HelitronY1A_CE	Helitron	1.26345	2.46863e-238
HPL-2	HelitronY1_CE	Helitron	1.53073	4.15026e-87
HPL-2	HelitronY3_CE	Helitron	0.896419	4.19046e-21
HPL-2	HelitronY4_CE	Helitron	4.68411	2.33836e-53
HPL-2	IR4	Cut_and_Paste	0.653084	2.94124e-07
HPL-2	LINE2C1_CE	LINE	0.685291	0.0348859
HPL-2	LmeSINE1c	SINE	0.849191	3.42469e-32
HPL-2	LONGPAL2	Cut_and_Paste	0.639158	1.10496e-19
HPL-2	LONGPAL3	Cut_and_Paste	0.598622	2.69439e-38
HPL-2	LTR2_CE	LTR	1.41983	0.00242996
HPL-2	LTRCER1	LTR	1.02882	5.56228e-07
HPL-2	MINISAT1_CE	Satellite	0.615529	3.08215e-37
HPL-2	MIRAGE1	Cut_and_Paste	0.764618	7.20881e-08
HPL-2	NDNAX3_CE	Cut_and_Paste	0.776525	4.23417e-18
HPL-2	NPAL5A_CE	Cut_and_Paste	0.971397	5.70027e-20
HPL-2	NPALTA1_CE	Cut_and_Paste	0.760792	2.90932e-38
HPL-2	PAL5A_CE	Cut_and_Paste	2.07992	4.74312e-60
HPL-2	PAL8A_CE	Cut_and_Paste	1.1343	0.00216226
HPL-2	PAL8D_CE	Cut_and_Paste	1.30029	8.22559e-11
HPL-2	PAL9A_CE	Cut_and_Paste	0.848327	2.59394e-06
HPL-2	PALTA3_CE	Cut_and_Paste	1.02065	5.46385e-44
HPL-2	PALTA4_CE	Cut_and_Paste	1.57683	1.52942e-38
HPL-2	PALTA5_CE	Cut_and_Paste	0.765263	2.20861e-227
HPL-2	PALTTAA2_CE	Cut_and_Paste	1.83467	1.20715e-255
HPL-2	PALTTTAAA1	Cut_and_Paste	1.2675	8.10637e-82
HPL-2	PALTTTAAA3	Cut_and_Paste	1.44171	1.79468e-48
HPL-2	RC123	Satellite	0.950768	4.94749e-19
HPL-2	RC35	Satellite	1.04869	3.88122e-131
HPL-2	RCA1	Satellite	1.39019	1.21845e-05
HPL-2	RCC9	Satellite	4.60047	9.65871e-10
HPL-2	RCD1	Satellite	2.35806	3.59471e-12
HPL-2	Tc1	Cut_and_Paste	0.64631	0.000146283
HPL-2	TC5	Cut_and_Paste	1.02525	0.00323454
HPL-2	TC5A	Cut_and_Paste	0.692858	6.87406e-09
HPL-2	Tc6	Cut_and_Paste	0.794776	5.12034e-05
HPL-2	TIR21T5A_CE	Cut_and_Paste	1.94668	3.98882e-13
HPL-2	TIR23T5A_CE	Cut_and_Paste	0.638819	3.15067e-07
HPL-2	TIR54TA1_CE	Cut_and_Paste	1.02374	1.82771e-15
HPL-2	Turmoil1	Cut_and_Paste	1.5729	0.00274658

## Sheet: LIN-13
Factor	Family	Class	log2 BEADS score	p-value
LIN-13	CELE1	Cut_and_Paste	2.56701	2.90734e-215
LIN-13	CELE14A	Cut_and_Paste	2.00947	9.17638e-157
LIN-13	CELE14B	Cut_and_Paste	2.13712	0
LIN-13	CELE2	Cut_and_Paste	1.43027	0
LIN-13	CELE4	Cut_and_Paste	2.72118	5.1422e-90
LIN-13	CELE42	Cut_and_Paste	3.1	1.78664e-162
LIN-13	CELE45	SINE	0.676087	6.54374e-43
LIN-13	CELE46B	Cut_and_Paste	1.60118	5.2607e-147
LIN-13	CELE6	Cut_and_Paste	1.27914	1.31669e-21
LIN-13	CEMUDR2	Cut_and_Paste	1.16701	8.46487e-06
LIN-13	CER1	LTR	1.20463	7.80977e-54
LIN-13	CER10-I_CE	LTR	1.64583	0.00031662
LIN-13	CER10-LTR_CE	LTR	2.10739	0.000724792
LIN-13	CER12-1-LTR_CE	LTR	2.06922	0.0383351
LIN-13	CER12-I_CE	LTR	0.93693	0.0109863
LIN-13	CER12-LTR_CE	LTR	1.91334	0.00031662
LIN-13	CER15-1-LTR_CE	LTR	2.487	0.02948
LIN-13	CER16-2-I_CE	LTR	0.859063	0.0863303
LIN-13	CER16-2-LTR_CE	LTR	2.01049	0.00289917
LIN-13	CER16-LTR_CE	LTR	1.72702	0.02948
LIN-13	CER2-1-LTR_CE	LTR	1.99223	0.00120544
LIN-13	CER2-I_CE	LTR	0.586546	0.0634766
LIN-13	CER3-1-LTR_CE	LTR	2.88838	6.1118e-09
LIN-13	CER3-I_CE	LTR	1.19098	0.0234985
LIN-13	CER3-LTR_CE	LTR	2.39118	1.06096e-05
LIN-13	CER7-I_CE	LTR	2.24164	9.65893e-10
LIN-13	CER8-I_CE	LTR	0.675371	1.01314e-05
LIN-13	CER8-LTR_CE	LTR	1.6937	0.0634766
LIN-13	CER9-I_CE	LTR	0.636981	4.92486e-09
LIN-13	CER9-LTR_CE	LTR	2.10151	4.47035e-07
LIN-13	CeRep1A	Cut_and_Paste	3.0774	4.36098e-09
LIN-13	CeRep3	Unknown	3.73613	7.2806e-148
LIN-13	CeRep4	Unknown	1.09555	1.17881e-106
LIN-13	CeRep5	Unknown	4.67206	1.13321e-224
LIN-13	CeRep52	Satellite	1.25871	2.2048e-254
LIN-13	CeRep55	Satellite	2.55977	3.03501e-76
LIN-13	CeRep56	Satellite	2.8855	1.36205e-17
LIN-13	CeRep57	Satellite	1.07782	0.000162125
LIN-13	CERP1	Unknown	1.38394	1.06554e-18
LIN-13	CERP2	Cut_and_Paste	1.91592	8.20207e-105
LIN-13	Chapaev-1_CE	Cut_and_Paste	2.42206	7.77697e-12
LIN-13	Chapaev-2_CE	Cut_and_Paste	1.63278	3.1012e-17
LIN-13	HAT2_CE	Cut_and_Paste	1.02044	4.1224e-11
LIN-13	HATN1_CE	Cut_and_Paste	2.10938	1.05494e-08
LIN-13	Helitron1_CE	Helitron	2.31427	2.52012e-65
LIN-13	Helitron2_CE	Helitron	3.76807	3.54372e-26
LIN-13	HelitronY1A_CE	Helitron	1.25454	1.97264e-231
LIN-13	HelitronY1_CE	Helitron	1.52269	1.74983e-87
LIN-13	HelitronY2_CE	Helitron	1.30355	3.27077e-47
LIN-13	HelitronY3_CE	Helitron	2.12029	7.32221e-40
LIN-13	HelitronY4_CE	Helitron	5.16998	9.40682e-54
LIN-13	IR1_CE	Cut_and_Paste	0.631197	5.5203e-06
LIN-13	IR4	Cut_and_Paste	2.21111	5.68321e-23
LIN-13	LmeSINE1c	SINE	2.24693	9.70651e-37
LIN-13	LONGPAL2	Cut_and_Paste	1.21291	7.26256e-29
LIN-13	LONGPAL3	Cut_and_Paste	1.24421	7.64321e-48
LIN-13	LTR1_CE	LTR	1.23071	0.00314713
LIN-13	LTR2_CE	LTR	2.23171	0.00031662
LIN-13	LTRCER1	LTR	2.25925	3.13702e-08
LIN-13	MIRAGE1	Cut_and_Paste	1.00243	1.05494e-08
LIN-13	NDNAX1_CE	Cut_and_Paste	0.703241	3.47382e-13
LIN-13	NDNAX3_CE	Cut_and_Paste	1.28472	2.20209e-20
LIN-13	NeSL-1	LINE	0.980254	7.52087e-06
LIN-13	NPAL0A_CE	Cut_and_Paste	0.692606	2.41754e-07
LIN-13	NPAL5A_CE	Cut_and_Paste	1.78091	9.84266e-26
LIN-13	NPALTA1_CE	Cut_and_Paste	1.69591	5.64724e-59
LIN-13	PAL5A_CE	Cut_and_Paste	2.38381	2.34952e-60
LIN-13	PAL8D_CE	Cut_and_Paste	0.654331	1.08932e-06
LIN-13	PAL9A_CE	Cut_and_Paste	1.27703	5.39876e-09
LIN-13	PALTA3_CE	Cut_and_Paste	3.11991	1.52061e-56
LIN-13	PALTA4_CE	Cut_and_Paste	2.7268	3.48149e-42
LIN-13	PALTA5_CE	Cut_and_Paste	0.928473	5.59287e-238
LIN-13	PALTTAA2_CE	Cut_and_Paste	3.18159	2.91957e-283
LIN-13	PALTTTAAA1	Cut_and_Paste	1.30465	4.1562e-77
LIN-13	PALTTTAAA3	Cut_and_Paste	1.76997	1.49032e-48
LIN-13	RC123	Satellite	2.51768	4.33975e-40
LIN-13	RC35	Satellite	0.894926	2.27335e-132
LIN-13	RC35S	Satellite	0.86603	1.39522e-30
LIN-13	RCA1	Satellite	3.21201	4.11092e-10
LIN-13	RCC9	Satellite	3.38561	6.67243e-09
LIN-13	RCD1	Satellite	2.64704	8.32868e-15
LIN-13	Tc1A	Cut_and_Paste	0.695246	9.12114e-59
LIN-13	TC4	Cut_and_Paste	0.875127	8.01729e-29
LIN-13	TC5	Cut_and_Paste	1.0667	0.00016211
LIN-13	TC5A	Cut_and_Paste	1.53923	7.57232e-11
LIN-13	TIR21T5A_CE	Cut_and_Paste	2.87717	8.47583e-14
LIN-13	TIR23T5A_CE	Cut_and_Paste	0.996946	9.54011e-09
LIN-13	TIR43YW1_CE	Cut_and_Paste	1.10987	4.11092e-10
LIN-13	TIR54TA1_CE	Cut_and_Paste	1.09187	3.24883e-17
LIN-13	TIR9TA1A_CE	Cut_and_Paste	2.39128	1.99966e-13
LIN-13	TIR9TA1B_CE	Cut_and_Paste	1.82081	6.16216e-89
LIN-13	TIR9TA1C_CE	Cut_and_Paste	0.689435	2.83179e-56
LIN-13	TIR9TA1_CE	Cut_and_Paste	2.62022	2.52195e-69

## Sheet: LIN-61
Factor	Family	Class	log2 BEADS score	p-value
LIN-61	CELE1	Cut_and_Paste	1.69248	6.80816e-211
LIN-61	CELE14A	Cut_and_Paste	1.02084	4.76693e-118
LIN-61	CELE14B	Cut_and_Paste	1.14912	2.81203e-254
LIN-61	CELE2	Cut_and_Paste	0.867746	0
LIN-61	CELE4	Cut_and_Paste	1.51497	1.07145e-86
LIN-61	CELE42	Cut_and_Paste	1.86504	3.23011e-160
LIN-61	CELE46B	Cut_and_Paste	1.10902	2.31482e-120
LIN-61	CELE6	Cut_and_Paste	0.643901	6.93662e-17
LIN-61	CEMUDR2	Cut_and_Paste	0.956022	0.000109802
LIN-61	CER1	LTR	1.46947	1.79756e-55
LIN-61	CER10-I_CE	LTR	1.96002	0.00062561
LIN-61	CER10-LTR_CE	LTR	0.729749	0.0376282
LIN-61	CER12-1-LTR_CE	LTR	1.09287	0.0787354
LIN-61	CER12-I_CE	LTR	0.941565	0.00457764
LIN-61	CER12-LTR_CE	LTR	1.27543	0.000915527
LIN-61	CER15-1-LTR_CE	LTR	1.16508	0.0109863
LIN-61	CER16-2-I_CE	LTR	1.14888	0.0189179
LIN-61	CER16-2-LTR_CE	LTR	1.48644	0.00564575
LIN-61	CER16-I_CE	LTR	1.04667	0.0605469
LIN-61	CER16-LTR_CE	LTR	1.07713	0.0384521
LIN-61	CER2-1-LTR_CE	LTR	1.61769	0.00120544
LIN-61	CER3-1-LTR_CE	LTR	2.24885	3.0268e-08
LIN-61	CER3-I_CE	LTR	1.25876	0.018425
LIN-61	CER3-LTR_CE	LTR	1.89343	5.42402e-05
LIN-61	CER7-I_CE	LTR	1.70118	1.70791e-09
LIN-61	CER8-I_CE	LTR	0.871231	0.000306014
LIN-61	CER9-I_CE	LTR	1.04658	2.3735e-12
LIN-61	CER9-LTR_CE	LTR	1.71791	6.38887e-07
LIN-61	CeRep1A	Cut_and_Paste	2.96959	3.06448e-09
LIN-61	CeRep3	Unknown	2.05976	1.11254e-144
LIN-61	CeRep5	Unknown	3.12419	1.1914e-222
LIN-61	CeRep53	Satellite	0.606371	7.64335e-06
LIN-61	CeRep55	Satellite	0.701806	8.67112e-42
LIN-61	CeRep56	Satellite	1.38656	3.31464e-15
LIN-61	CeRep57	Satellite	1.03316	0.000164032
LIN-61	CERP1	Unknown	0.671089	1.31098e-09
LIN-61	CERP2	Cut_and_Paste	1.15107	4.57934e-94
LIN-61	Chapaev-1_CE	Cut_and_Paste	1.68405	2.905e-11
LIN-61	Chapaev-2_CE	Cut_and_Paste	1.87268	6.27579e-17
LIN-61	HAT2_CE	Cut_and_Paste	0.997805	4.48107e-10
LIN-61	HAT4_CE	Cut_and_Paste	0.644604	2.48596e-06
LIN-61	HATN1_CE	Cut_and_Paste	0.788059	5.45903e-06
LIN-61	Helitron1_CE	Helitron	1.77299	4.2735e-62
LIN-61	Helitron2_CE	Helitron	2.29484	6.72554e-26
LIN-61	HelitronY1A_CE	Helitron	1.24915	6.60623e-221
LIN-61	HelitronY1_CE	Helitron	1.59293	3.90461e-81
LIN-61	HelitronY2_CE	Helitron	0.664783	1.32605e-29
LIN-61	HelitronY3_CE	Helitron	0.853844	1.33446e-27
LIN-61	HelitronY4_CE	Helitron	3.45428	4.13673e-52
LIN-61	IR4	Cut_and_Paste	1.10801	6.57322e-16
LIN-61	LINE2C1_CE	LINE	1.11152	0.00169303
LIN-61	LmeSINE1c	SINE	1.64437	1.07479e-36
LIN-61	LONGPAL2	Cut_and_Paste	0.933044	7.11283e-25
LIN-61	LONGPAL3	Cut_and_Paste	0.897093	1.96897e-40
LIN-61	LTR1_CE	LTR	0.897542	0.0281038
LIN-61	LTR2_CE	LTR	1.37563	0.00062561
LIN-61	LTRCER1	LTR	1.23885	2.6898e-07
LIN-61	Mariner2_CE	Cut_and_Paste	0.618069	4.09907e-09
LIN-61	MIRAGE1	Cut_and_Paste	0.908652	2.64179e-08
LIN-61	NDNAX1_CE	Cut_and_Paste	0.66942	4.74262e-12
LIN-61	NDNAX2_CE	Cut_and_Paste	0.600044	1.08681e-24
LIN-61	NDNAX3_CE	Cut_and_Paste	1.01814	8.88202e-20
LIN-61	NeSL-1	LINE	1.52618	1.98752e-05
LIN-61	NPAL5A_CE	Cut_and_Paste	0.960615	1.40738e-22
LIN-61	NPALTA1_CE	Cut_and_Paste	1.09579	6.18401e-48
LIN-61	PAL5A_CE	Cut_and_Paste	2.4053	1.62645e-60
LIN-61	PAL8A_CE	Cut_and_Paste	0.997668	0.0316775
LIN-61	PAL8D_CE	Cut_and_Paste	1.46034	9.96661e-10
LIN-61	PAL9A_CE	Cut_and_Paste	1.39235	2.14095e-08
LIN-61	PALTA3_CE	Cut_and_Paste	1.90768	4.64341e-52
LIN-61	PALTA4_CE	Cut_and_Paste	1.67695	2.12332e-40
LIN-61	PALTTAA2_CE	Cut_and_Paste	1.84712	8.3585e-261
LIN-61	PALTTTAAA1	Cut_and_Paste	1.10246	6.53048e-68
LIN-61	PALTTTAAA3	Cut_and_Paste	1.46377	9.897e-50
LIN-61	RC123	Satellite	1.49305	2.60799e-34
LIN-61	RC35	Satellite	1.13554	1.38479e-126
LIN-61	RCA1	Satellite	1.59897	5.75183e-08
LIN-61	RCC9	Satellite	2.95384	5.2409e-07
LIN-61	RCD1	Satellite	1.60979	8.39393e-12
LIN-61	Tc1	Cut_and_Paste	1.35628	2.58174e-06
LIN-61	TC4	Cut_and_Paste	0.826716	6.46174e-31
LIN-61	TC5	Cut_and_Paste	1.94422	0.000559032
LIN-61	TC5A	Cut_and_Paste	1.19937	8.18077e-10
LIN-61	Tc6	Cut_and_Paste	0.818277	0.000111776
LIN-61	TIR21T5A_CE	Cut_and_Paste	1.82287	2.98657e-13
LIN-61	TIR23T5A_CE	Cut_and_Paste	0.749316	2.47442e-07
LIN-61	TIR43YW1_CE	Cut_and_Paste	0.71928	0.000204761
LIN-61	TIR54TA1_CE	Cut_and_Paste	0.881601	4.13878e-14
LIN-61	TIR9TA1A_CE	Cut_and_Paste	1.12739	2.12982e-11
LIN-61	TIR9TA1B_CE	Cut_and_Paste	0.746063	2.66652e-64
LIN-61	TIR9TA1_CE	Cut_and_Paste	1.22659	1.1951e-64
LIN-61	Turmoil1	Cut_and_Paste	2.49172	0.0151672
LIN-61	Vingi-2_CE	LINE	1.08547	0.00590873

## Sheet: MET-2
Factor	Family	Class	log2 BEADS score	p-value
MET-2	CELE1	Cut_and_Paste	1.15936	3.16021e-210
MET-2	CELE14A	Cut_and_Paste	0.933996	3.97835e-140
MET-2	CELE14B	Cut_and_Paste	0.979725	1.94501e-285
MET-2	CELE4	Cut_and_Paste	0.965958	8.32328e-85
MET-2	CELE42	Cut_and_Paste	1.54584	4.72298e-160
MET-2	CELE46B	Cut_and_Paste	0.757194	1.68266e-133
MET-2	CEMUDR2	Cut_and_Paste	0.666609	5.94115e-05
MET-2	CER1	LTR	0.656002	2.3954e-46
MET-2	CER10-LTR_CE	LTR	0.886004	0.00107288
MET-2	CER12-1-LTR_CE	LTR	0.919821	0.0337524
MET-2	CER12-LTR_CE	LTR	1.09993	0.00165939
MET-2	CER15-1-LTR_CE	LTR	1.17406	0.0735168
MET-2	CER16-2-I_CE	LTR	0.912497	0.0444613
MET-2	CER16-2-LTR_CE	LTR	1.13063	0.00443268
MET-2	CER2-1-LTR_CE	LTR	2.17288	0.00134277
MET-2	CER3-1-LTR_CE	LTR	2.17993	6.59748e-08
MET-2	CER3-I_CE	LTR	0.934884	0.0592232
MET-2	CER3-LTR_CE	LTR	1.55714	2.43187e-05
MET-2	CER7-I_CE	LTR	1.1745	2.0247e-09
MET-2	CER9-LTR_CE	LTR	1.78735	2.06754e-07
MET-2	CeRep1A	Cut_and_Paste	1.81945	3.467e-09
MET-2	CeRep3	Unknown	0.587835	2.95719e-127
MET-2	CeRep5	Unknown	2.66948	4.53761e-222
MET-2	CeRep55	Satellite	0.66227	5.2568e-43
MET-2	CeRep56	Satellite	0.720146	2.21296e-11
MET-2	CERP1	Unknown	0.661378	6.87495e-13
MET-2	CERP2	Cut_and_Paste	0.792264	6.4773e-84
MET-2	Chapaev-1_CE	Cut_and_Paste	1.3095	3.80651e-11
MET-2	Chapaev-2_CE	Cut_and_Paste	1.022	4.29799e-16
MET-2	HATN1_CE	Cut_and_Paste	1.40811	6.59748e-08
MET-2	Helitron1_CE	Helitron	1.15344	1.66366e-61
MET-2	Helitron2_CE	Helitron	2.97299	4.21331e-26
MET-2	HelitronY1A_CE	Helitron	0.721766	1.84178e-229
MET-2	HelitronY1_CE	Helitron	0.849623	1.6374e-79
MET-2	HelitronY2_CE	Helitron	0.804128	3.05276e-40
MET-2	HelitronY3_CE	Helitron	0.762136	3.30007e-33
MET-2	HelitronY4_CE	Helitron	3.7393	1.4887e-53
MET-2	IR4	Cut_and_Paste	0.798911	4.03299e-19
MET-2	LmeSINE1c	SINE	1.14595	1.25332e-36
MET-2	LTR1_CE	LTR	0.69972	0.000824451
MET-2	LTR2_CE	LTR	1.49585	0.00320435
MET-2	LTRCER1	LTR	0.772924	4.80145e-07
MET-2	NeSL-1	LINE	0.963247	7.75724e-06
MET-2	NPAL5A_CE	Cut_and_Paste	0.692851	5.277e-22
MET-2	NPALTA1_CE	Cut_and_Paste	0.806889	1.06216e-52
MET-2	PAL5A_CE	Cut_and_Paste	1.09463	1.30253e-59
MET-2	PAL9A_CE	Cut_and_Paste	0.811771	1.45001e-06
MET-2	PALTA3_CE	Cut_and_Paste	2.33908	2.68527e-55
MET-2	PALTA4_CE	Cut_and_Paste	1.18595	1.09612e-39
MET-2	PALTTAA2_CE	Cut_and_Paste	1.14189	9.8369e-242
MET-2	PALTTTAAA1	Cut_and_Paste	0.639195	1.84329e-66
MET-2	PALTTTAAA3	Cut_and_Paste	0.886455	2.91563e-45
MET-2	RC123	Satellite	2.04288	8.29288e-39
MET-2	RCA1	Satellite	2.17736	2.1646e-09
MET-2	RCC9	Satellite	5.11044	2.07695e-09
MET-2	RCD1	Satellite	1.30773	3.13996e-13
MET-2	TC5	Cut_and_Paste	0.994391	0.00037539
MET-2	TC5A	Cut_and_Paste	0.635081	5.67567e-08
MET-2	TIR21T5A_CE	Cut_and_Paste	2.38133	9.51432e-14
MET-2	TIR54TA1_CE	Cut_and_Paste	0.885523	1.00408e-15
MET-2	TIR9TA1A_CE	Cut_and_Paste	1.3976	1.3809e-12
MET-2	TIR9TA1B_CE	Cut_and_Paste	0.693132	2.40976e-76
MET-2	TIR9TA1_CE	Cut_and_Paste	1.46296	2.4996e-66
MET-2	Turmoil1	Cut_and_Paste	1.07034	0.00259399

## Sheet: LET-418
Factor	Family	Class	log2 BEADS score	p-value
LET-418	CELE14B	Cut_and_Paste	0.597831	1.39392e-172
LET-418	CELE2	Cut_and_Paste	0.646587	0
LET-418	CELE4	Cut_and_Paste	0.760689	1.29321e-72
LET-418	CELE42	Cut_and_Paste	1.08592	1.94437e-149
LET-418	CER3-1-LTR_CE	LTR	0.872327	2.25159e-06
LET-418	CER3-LTR_CE	LTR	1.05643	0.00508606
LET-418	CER7-I_CE	LTR	1.57259	8.13056e-09
LET-418	CeRep1A	Cut_and_Paste	1.67933	3.59225e-09
LET-418	CeRep3	Unknown	1.76144	9.83077e-144
LET-418	CeRep5	Unknown	1.99957	2.24964e-216
LET-418	CERP2	Cut_and_Paste	0.771497	1.53357e-85
LET-418	Chapaev-1_CE	Cut_and_Paste	0.623121	8.52232e-08
LET-418	Helitron1_CE	Helitron	0.923096	3.46291e-48
LET-418	Helitron2_CE	Helitron	1.37205	5.80617e-25
LET-418	HelitronY2_CE	Helitron	0.586933	7.84132e-29
LET-418	HelitronY4_CE	Helitron	2.33069	2.36696e-48
LET-418	IR4	Cut_and_Paste	0.596007	3.78998e-12
LET-418	LmeSINE1c	SINE	1.58054	1.65686e-36
LET-418	LTRCER1	LTR	0.726491	1.5107e-06
LET-418	NeSL-1	LINE	0.674293	0.0630703
LET-418	PALTA3_CE	Cut_and_Paste	1.09203	1.56985e-48
LET-418	PALTA4_CE	Cut_and_Paste	0.68198	1.65655e-30
LET-418	PALTTAA2_CE	Cut_and_Paste	2.56947	2.10832e-272
LET-418	RC123	Satellite	0.990239	3.56411e-28
LET-418	RCA1	Satellite	1.3701	2.5084e-07
LET-418	RCC9	Satellite	1.67335	1.86737e-05
LET-418	RCD1	Satellite	1.03278	1.73463e-09
LET-418	TC5A	Cut_and_Paste	0.800428	3.05983e-09
LET-418	TIR21T5A_CE	Cut_and_Paste	1.06161	4.64512e-12
LET-418	TIR9TA1A_CE	Cut_and_Paste	0.657032	1.4087e-08
LET-418	TIR9TA1_CE	Cut_and_Paste	0.713774	2.9938e-51

## Sheet: H3K9me2
Factor	Family	Class	log2 BEADS score	p-value
H3K9me2	CELE1	Cut_and_Paste	1.21831	1.07334e-190
H3K9me2	CELE14A	Cut_and_Paste	1.00654	2.84288e-128
H3K9me2	CELE14B	Cut_and_Paste	1.09727	5.97891e-268
H3K9me2	CELE4	Cut_and_Paste	0.990163	4.76196e-65
H3K9me2	CELE42	Cut_and_Paste	2.37174	7.33141e-160
H3K9me2	CELE46B	Cut_and_Paste	0.801192	6.15899e-99
H3K9me2	CEMUDR2	Cut_and_Paste	1.13377	2.84214e-06
H3K9me2	CER1	LTR	1.15992	7.06234e-48
H3K9me2	CER10-I_CE	LTR	1.67014	0.000305176
H3K9me2	CER12-I_CE	LTR	1.79685	0.00222778
H3K9me2	CER13-I_CE	LTR	0.706481	0.0720215
H3K9me2	CER15-1-I_CE	LTR	0.612218	0.00830078
H3K9me2	CER16-2-I_CE	LTR	1.29067	0.0676578
H3K9me2	CER16-2-LTR_CE	LTR	2.01019	0.000579834
H3K9me2	CER16-LTR_CE	LTR	1.59363	0.0396729
H3K9me2	CER2-1-LTR_CE	LTR	1.23995	0.0429688
H3K9me2	CER2-I_CE	LTR	0.939312	0.0605469
H3K9me2	CER2-LTR_CE	LTR	0.885559	0.0161133
H3K9me2	CER3-1-LTR_CE	LTR	2.02943	2.05153e-06
H3K9me2	CER3-LTR_CE	LTR	1.50432	0.000244379
H3K9me2	CER8-I_CE	LTR	0.732221	2.42394e-05
H3K9me2	CER8-LTR_CE	LTR	1.43626	0.0605469
H3K9me2	CER9-I_CE	LTR	1.49644	1.70062e-11
H3K9me2	CER9-LTR_CE	LTR	2.4858	1.93715e-07
H3K9me2	CeRep1A	Cut_and_Paste	0.964473	2.42394e-05
H3K9me2	CeRep3	Unknown	1.65607	2.6683e-143
H3K9me2	CeRep4	Unknown	1.22962	3.88911e-125
H3K9me2	CeRep5	Unknown	3.35561	1.28498e-222
H3K9me2	CeRep52	Satellite	0.626523	7.66035e-204
H3K9me2	CeRep53	Satellite	1.16994	1.32017e-14
H3K9me2	CeRep55	Satellite	2.22292	1.41075e-76
H3K9me2	CeRep56	Satellite	2.21873	1.31264e-17
H3K9me2	CeRep57	Satellite	4.13005	0.00015831
H3K9me2	CERP1	Unknown	1.38014	2.40852e-18
H3K9me2	Chapaev-1_CE	Cut_and_Paste	1.44842	5.03126e-11
H3K9me2	Chapaev-2_CE	Cut_and_Paste	1.13898	2.18312e-16
H3K9me2	HAT2_CE	Cut_and_Paste	1.25221	2.18783e-12
H3K9me2	HAT4_CE	Cut_and_Paste	0.602267	7.91256e-08
H3K9me2	HATN1_CE	Cut_and_Paste	0.887572	2.20242e-07
H3K9me2	Helitron1_CE	Helitron	1.44322	1.14233e-62
H3K9me2	Helitron2_CE	Helitron	3.82069	3.67595e-26
H3K9me2	HelitronY1A_CE	Helitron	0.993721	1.9924e-201
H3K9me2	HelitronY1_CE	Helitron	1.10054	3.44779e-79
H3K9me2	HelitronY2_CE	Helitron	0.926516	2.471e-43
H3K9me2	HelitronY4_CE	Helitron	2.49316	1.4093e-46
H3K9me2	IR4	Cut_and_Paste	0.908698	2.83162e-16
H3K9me2	LONGPAL2	Cut_and_Paste	1.07046	1.62781e-29
H3K9me2	LONGPAL3	Cut_and_Paste	1.09822	2.39762e-48
H3K9me2	LTR1_CE	LTR	1.0233	0.000270367
H3K9me2	LTR2_CE	LTR	1.84095	0.0140572
H3K9me2	LTRCER1	LTR	1.64412	5.58602e-06
H3K9me2	MIRAGE1	Cut_and_Paste	1.3535	8.97572e-10
H3K9me2	NDNAX1_CE	Cut_and_Paste	0.894441	1.13969e-16
H3K9me2	NDNAX2_CE	Cut_and_Paste	0.823513	6.36766e-37
H3K9me2	NeSL-1	LINE	0.93338	5.72413e-08
H3K9me2	NPAL0A_CE	Cut_and_Paste	1.1691	7.94954e-12
H3K9me2	NPAL5A_CE	Cut_and_Paste	1.28475	2.92841e-25
H3K9me2	PAL5A_CE	Cut_and_Paste	2.7339	1.5069e-59
H3K9me2	PAL8A_CE	Cut_and_Paste	0.731479	0.000531672
H3K9me2	PAL8D_CE	Cut_and_Paste	0.993943	4.72344e-10
H3K9me2	PAL9A_CE	Cut_and_Paste	1.38791	3.45754e-08
H3K9me2	PALNN1_CE	Cut_and_Paste	0.947531	1.85049e-06
H3K9me2	PALTA3_CE	Cut_and_Paste	1.33437	2.85063e-48
H3K9me2	PALTA4_CE	Cut_and_Paste	1.4117	2.51162e-39
H3K9me2	PALTA5_CE	Cut_and_Paste	0.763284	2.6206e-243
H3K9me2	PALTTAA2_CE	Cut_and_Paste	2.17163	1.7768e-277
H3K9me2	PALTTTAAA1	Cut_and_Paste	1.01917	1.33638e-56
H3K9me2	PALTTTAAA3	Cut_and_Paste	1.07909	1.5119e-34
H3K9me2	RC123	Satellite	2.60564	5.77186e-40
H3K9me2	RC35	Satellite	0.843345	2.54265e-112
H3K9me2	RCA1	Satellite	1.75874	1.00954e-09
H3K9me2	RCD1	Satellite	1.56248	4.92855e-14
H3K9me2	RCS5	Satellite	0.902994	4.69617e-12
H3K9me2	RTE1	LINE	0.585722	5.58602e-06
H3K9me2	Tc1	Cut_and_Paste	0.886644	2.06681e-07
H3K9me2	TC4	Cut_and_Paste	0.750444	6.09575e-28
H3K9me2	TC5A	Cut_and_Paste	0.978532	3.64207e-10
H3K9me2	Tc6	Cut_and_Paste	0.703865	5.28722e-07
H3K9me2	TIR21T5A_CE	Cut_and_Paste	1.7953	8.57269e-13
H3K9me2	TIR43YW1_CE	Cut_and_Paste	1.82087	1.00954e-09
H3K9me2	TIR9TA1A_CE	Cut_and_Paste	1.63808	9.98984e-14
H3K9me2	TIR9TA1B_CE	Cut_and_Paste	1.00535	4.57063e-87
H3K9me2	TIR9TA1_CE	Cut_and_Paste	1.444	1.88596e-67
H3K9me2	Vingi-1_CE	LINE	0.823806	2.2456e-05
H3K9me2	Vingi-2_CE	LINE	1.00389	4.64497e-05

## Sheet: H3K9me3
Factor	Family	Class	log2 BEADS score	p-value
H3K9me3	CELE42	Cut_and_Paste	0.84184	1.42386e-135
H3K9me3	CELE45	SINE	0.858673	9.05508e-88
H3K9me3	CER10-I_CE	LTR	1.36436	0.0335693
H3K9me3	CER12-1-LTR_CE	LTR	1.39332	0.0957947
H3K9me3	CER12-I_CE	LTR	3.00619	0.00286865
H3K9me3	CER13-I_CE	LTR	2.85102	0.0202637
H3K9me3	CER15-1-LTR_CE	LTR	2.02435	0.0247192
H3K9me3	CER16-2-I_CE	LTR	0.860097	0.0456162
H3K9me3	CER16-2-LTR_CE	LTR	2.69911	0.00347137
H3K9me3	CER16-LTR_CE	LTR	1.69932	0.0666504
H3K9me3	CER2-1-LTR_CE	LTR	1.89274	0.000732422
H3K9me3	CER2-I_CE	LTR	3.01006	0.0751953
H3K9me3	CER2-LTR_CE	LTR	1.68337	0.0202637
H3K9me3	CER3-1-LTR_CE	LTR	2.28026	3.0442e-06
H3K9me3	CER3-LTR_CE	LTR	1.9794	0.00472783
H3K9me3	CER5-I_CE	LTR	1.82713	3.27826e-05
H3K9me3	CER5-LTR_CE	LTR	0.619074	0.00531006
H3K9me3	CER7-I_CE	LTR	1.15363	8.29081e-10
H3K9me3	CER8-I_CE	LTR	1.91465	0.000380184
H3K9me3	CER8-LTR_CE	LTR	2.76353	0.0751953
H3K9me3	CER9-I_CE	LTR	2.90638	3.08839e-12
H3K9me3	CER9-LTR_CE	LTR	3.17026	2.36556e-07
H3K9me3	CeRep52	Satellite	0.743786	4.98112e-275
H3K9me3	CeRep53	Satellite	2.34106	1.93581e-18
H3K9me3	CeRep57	Satellite	2.77206	0.000196457
H3K9me3	Chapaev-1_CE	Cut_and_Paste	0.58782	6.48409e-06
H3K9me3	HAT2_CE	Cut_and_Paste	0.833052	2.37506e-11
H3K9me3	HATN1_CE	Cut_and_Paste	0.820959	4.83949e-08
H3K9me3	Helitron2_CE	Helitron	0.768535	1.82509e-22
H3K9me3	IR1_CE	Cut_and_Paste	0.682349	1.01007e-05
H3K9me3	LINE2A_CE	LINE	0.727888	1.24857e-06
H3K9me3	LINE2B_CE	LINE	0.651334	3.59161e-07
H3K9me3	LINE2C1_CE	LINE	1.17484	0.000205094
H3K9me3	LINE2C_CE	LINE	1.01608	2.83186e-08
H3K9me3	LINE2H_CE	LINE	1.09289	0.000756644
H3K9me3	LmeSINE1c	SINE	0.92216	2.19259e-34
H3K9me3	LTR1_CE	LTR	1.15816	0.000647545
H3K9me3	LTRCER1	LTR	1.01609	9.84582e-05
H3K9me3	MAR_CE	Cut_and_Paste	0.876448	3.55653e-07
H3K9me3	Mariner2_CE	Cut_and_Paste	1.61651	8.12101e-15
H3K9me3	Mariner3_CE	Cut_and_Paste	0.920598	1.02645e-10
H3K9me3	MIRAGE1	Cut_and_Paste	1.24827	1.06134e-09
H3K9me3	NDNAX2_CE	Cut_and_Paste	1.09437	2.49928e-40
H3K9me3	NeSL-1	LINE	0.926311	2.26009e-10
H3K9me3	NPAL0A_CE	Cut_and_Paste	1.38075	4.6143e-13
H3K9me3	PAL9A_CE	Cut_and_Paste	1.32257	2.68119e-08
H3K9me3	PALTA3_CE	Cut_and_Paste	0.891032	2.30358e-47
H3K9me3	RCD1	Satellite	0.791722	3.24356e-09
H3K9me3	RCS5	Satellite	0.656764	5.84062e-12
H3K9me3	RTE1	LINE	1.74134	6.34612e-12
H3K9me3	Tc1	Cut_and_Paste	2.585	2.2956e-06
H3K9me3	TC5	Cut_and_Paste	1.08365	0.000562057
H3K9me3	TIR21T5A_CE	Cut_and_Paste	0.627163	7.01224e-08
H3K9me3	TIR43YW1_CE	Cut_and_Paste	0.65581	0.000290758
H3K9me3	TIR9TA1A_CE	Cut_and_Paste	1.75638	6.22017e-14
H3K9me3	TIR9TA1B_CE	Cut_and_Paste	1.22549	1.30926e-100
H3K9me3	TIR9TA1_CE	Cut_and_Paste	1.36506	1.87601e-68
H3K9me3	Turmoil1	Cut_and_Paste	1.90748	0.0957947
H3K9me3	Vingi-1_CE	LINE	2.16844	2.36556e-07
H3K9me3	Vingi-2_CE	LINE	2.12732	9.01055e-08

## Sheet: Compiled
Family	Class	HPL-2	LIN-13	LIN-61	MET-2	LET-418	H3K9me2	H3K9me3
CELE14B	Cut_and_Paste	+	+	+	+	+	+	-
CELE4	Cut_and_Paste	+	+	+	+	+	+	-
CELE42	Cut_and_Paste	+	+	+	+	+	+	+
CER3-1-LTR_CE	LTR	+	+	+	+	+	+	+
CER3-LTR_CE	LTR	+	+	+	+	+	+	+
CER7-I_CE	LTR	+	+	+	+	+	-	+
CeRep1A	Cut_and_Paste	+	+	+	+	+	+	-
CeRep3	Unknown	+	+	+	+	+	+	-
CeRep5	Unknown	+	+	+	+	+	+	-
CERP2	Cut_and_Paste	+	+	+	+	+	-	-
Chapaev-1_CE	Cut_and_Paste	+	+	+	+	+	+	+
Helitron1_CE	Helitron	+	+	+	+	+	+	-
Helitron2_CE	Helitron	+	+	+	+	+	+	+
HelitronY4_CE	Helitron	+	+	+	+	+	+	-
IR4	Cut_and_Paste	+	+	+	+	+	+	-
LmeSINE1c	SINE	+	+	+	+	+	-	+
LTRCER1	LTR	+	+	+	+	+	+	+
PALTA3_CE	Cut_and_Paste	+	+	+	+	+	+	+
PALTA4_CE	Cut_and_Paste	+	+	+	+	+	+	-
PALTTAA2_CE	Cut_and_Paste	+	+	+	+	+	+	-
RC123	Satellite	+	+	+	+	+	+	-
RCA1	Satellite	+	+	+	+	+	+	-
RCC9	Satellite	+	+	+	+	+	-	-
RCD1	Satellite	+	+	+	+	+	+	+
TC5A	Cut_and_Paste	+	+	+	+	+	+	-
TIR21T5A_CE	Cut_and_Paste	+	+	+	+	+	+	+
CELE1	Cut_and_Paste	+	+	+	+	-	+	-
CELE14A	Cut_and_Paste	+	+	+	+	-	+	-
CELE46B	Cut_and_Paste	+	+	+	+	-	+	-
CEMUDR2	Cut_and_Paste	+	+	+	+	-	+	-
CER1	LTR	+	+	+	+	-	+	-
CER10-LTR_CE	LTR	+	+	+	+	-	-	-
CER2-1-LTR_CE	LTR	+	+	+	+	-	+	+
CER3-I_CE	LTR	+	+	+	+	-	-	-
Chapaev-2_CE	Cut_and_Paste	+	+	+	+	-	+	-
HelitronY1A_CE	Helitron	+	+	+	+	-	+	-
HelitronY1_CE	Helitron	+	+	+	+	-	+	-
HelitronY3_CE	Helitron	+	+	+	+	-	-	-
LTR2_CE	LTR	+	+	+	+	-	+	-
NPAL5A_CE	Cut_and_Paste	+	+	+	+	-	+	-
NPALTA1_CE	Cut_and_Paste	+	+	+	+	-	-	-
PAL5A_CE	Cut_and_Paste	+	+	+	+	-	+	-
PAL9A_CE	Cut_and_Paste	+	+	+	+	-	+	+
PALTTTAAA1	Cut_and_Paste	+	+	+	+	-	+	-
PALTTTAAA3	Cut_and_Paste	+	+	+	+	-	+	-
TC5	Cut_and_Paste	+	+	+	+	-	-	+
TIR54TA1_CE	Cut_and_Paste	+	+	+	+	-	-	-
CELE2	Cut_and_Paste	+	+	+	-	+	-	-
CELE6	Cut_and_Paste	+	+	+	-	-	-	-
CER10-I_CE	LTR	+	+	+	-	-	+	+
CER8-I_CE	LTR	+	+	+	-	-	+	+
CER9-I_CE	LTR	+	+	+	-	-	+	+
CeRep57	Satellite	+	+	+	-	-	+	+
HAT2_CE	Cut_and_Paste	+	+	+	-	-	+	+
LONGPAL2	Cut_and_Paste	+	+	+	-	-	+	-
LONGPAL3	Cut_and_Paste	+	+	+	-	-	+	-
MIRAGE1	Cut_and_Paste	+	+	+	-	-	+	+
NDNAX3_CE	Cut_and_Paste	+	+	+	-	-	-	-
PAL8D_CE	Cut_and_Paste	+	+	+	-	-	+	-
RC35	Satellite	+	+	+	-	-	+	-
TIR23T5A_CE	Cut_and_Paste	+	+	+	-	-	-	-
PALTA5_CE	Cut_and_Paste	+	+	-	-	-	+	-
Turmoil1	Cut_and_Paste	+	-	+	+	-	-	+
CeRep53	Satellite	+	-	+	-	-	+	+
LINE2C1_CE	LINE	+	-	+	-	-	-	+
PAL8A_CE	Cut_and_Paste	+	-	+	-	-	+	-
Tc1	Cut_and_Paste	+	-	+	-	-	+	+
Tc6	Cut_and_Paste	+	-	+	-	-	+	-
MINISAT1_CE	Satellite	+	-	-	-	-	-	-
HelitronY2_CE	Helitron	-	+	+	+	+	+	-
NeSL-1	LINE	-	+	+	+	+	+	+
TIR9TA1A_CE	Cut_and_Paste	-	+	+	+	+	+	+
TIR9TA1_CE	Cut_and_Paste	-	+	+	+	+	+	+
CER12-1-LTR_CE	LTR	-	+	+	+	-	-	+
CER12-LTR_CE	LTR	-	+	+	+	-	-	-
CER15-1-LTR_CE	LTR	-	+	+	+	-	-	+
CER16-2-I_CE	LTR	-	+	+	+	-	+	+
CER16-2-LTR_CE	LTR	-	+	+	+	-	+	+
CER9-LTR_CE	LTR	-	+	+	+	-	+	+
CeRep55	Satellite	-	+	+	+	-	+	-
CeRep56	Satellite	-	+	+	+	-	+	-
CERP1	Unknown	-	+	+	+	-	+	-
HATN1_CE	Cut_and_Paste	-	+	+	+	-	+	+
LTR1_CE	LTR	-	+	+	+	-	+	+
TIR9TA1B_CE	Cut_and_Paste	-	+	+	+	-	+	+
CER12-I_CE	LTR	-	+	+	-	-	+	+
CER16-LTR_CE	LTR	-	+	+	-	-	+	+
NDNAX1_CE	Cut_and_Paste	-	+	+	-	-	+	-
TC4	Cut_and_Paste	-	+	+	-	-	+	-
TIR43YW1_CE	Cut_and_Paste	-	+	+	-	-	+	+
CELE45	SINE	-	+	-	-	-	-	+
CER2-I_CE	LTR	-	+	-	-	-	+	+
CER8-LTR_CE	LTR	-	+	-	-	-	+	+
CeRep4	Unknown	-	+	-	-	-	+	-
CeRep52	Satellite	-	+	-	-	-	+	+
IR1_CE	Cut_and_Paste	-	+	-	-	-	-	+
NPAL0A_CE	Cut_and_Paste	-	+	-	-	-	+	+
RC35S	Satellite	-	+	-	-	-	-	-
Tc1A	Cut_and_Paste	-	+	-	-	-	-	-
TIR9TA1C_CE	Cut_and_Paste	-	+	-	-	-	-	-
CER16-I_CE	LTR	-	-	+	-	-	-	-
HAT4_CE	Cut_and_Paste	-	-	+	-	-	+	-
Mariner2_CE	Cut_and_Paste	-	-	+	-	-	-	+
NDNAX2_CE	Cut_and_Paste	-	-	+	-	-	+	+
Vingi-2_CE	LINE	-	-	+	-	-	+	+
CELE11	Cut_and_Paste	-	-	-	-	-	-	-
CELE12A	Cut_and_Paste	-	-	-	-	-	-	-
CELE12B	Cut_and_Paste	-	-	-	-	-	-	-
CELE46A	Cut_and_Paste	-	-	-	-	-	-	-
CELE7	Cut_and_Paste	-	-	-	-	-	-	-
CELETC2	Cut_and_Paste	-	-	-	-	-	-	-
CEMUDR1	Cut_and_Paste	-	-	-	-	-	-	-
CER13-I_CE	LTR	-	-	-	-	-	+	+
CER15-1-I_CE	LTR	-	-	-	-	-	+	-
CER17-I_CE	LTR	-	-	-	-	-	-	-
CER2-LTR_CE	LTR	-	-	-	-	-	+	+
CER5-I_CE	LTR	-	-	-	-	-	-	+
CER5-LTR_CE	LTR	-	-	-	-	-	-	+
CER6-LTR_CE	LTR	-	-	-	-	-	-	-
CeRep58	Satellite	-	-	-	-	-	-	-
CeRep59	Satellite	-	-	-	-	-	-	-
CERP16	Unknown	-	-	-	-	-	-	-
CERP3	Unknown	-	-	-	-	-	-	-
CERP4	Cut_and_Paste	-	-	-	-	-	-	-
DNA-3-1_CE	Cut_and_Paste	-	-	-	-	-	-	-
HAT1_CE	Cut_and_Paste	-	-	-	-	-	-	-
HAT3_CE	Cut_and_Paste	-	-	-	-	-	-	-
IR3_CE	Cut_and_Paste	-	-	-	-	-	-	-
LINE2A_CE	LINE	-	-	-	-	-	-	+
LINE2B_CE	LINE	-	-	-	-	-	-	+
LINE2C_CE	LINE	-	-	-	-	-	-	+
LINE2D_CE	LINE	-	-	-	-	-	-	-
LINE2E_CE	LINE	-	-	-	-	-	-	-
LINE2F_CE	LINE	-	-	-	-	-	-	-
LINE2G_CE	LINE	-	-	-	-	-	-	-
LINE2H_CE	LINE	-	-	-	-	-	-	+
LONGPAL1	Cut_and_Paste	-	-	-	-	-	-	-
LR9A	Unknown	-	-	-	-	-	-	-
MAR_CE	Cut_and_Paste	-	-	-	-	-	-	+
MARINCE1	Cut_and_Paste	-	-	-	-	-	-	-
Mariner3_CE	Cut_and_Paste	-	-	-	-	-	-	+
Mariner4_CE	Cut_and_Paste	-	-	-	-	-	-	-
Mariner5_CE	Cut_and_Paste	-	-	-	-	-	-	-
Merlin1m_CE	Cut_and_Paste	-	-	-	-	-	-	-
MSAT1_CE	Satellite	-	-	-	-	-	-	-
NTC2A	Cut_and_Paste	-	-	-	-	-	-	-
PAL3A_CE	Cut_and_Paste	-	-	-	-	-	-	-
PAL8B_CE	Cut_and_Paste	-	-	-	-	-	-	-
PAL8C_1	Cut_and_Paste	-	-	-	-	-	-	-
PAL8C_2	Cut_and_Paste	-	-	-	-	-	-	-
PAL8C_3	Cut_and_Paste	-	-	-	-	-	-	-
PAL8C_4	Cut_and_Paste	-	-	-	-	-	-	-
PAL8C_5	Cut_and_Paste	-	-	-	-	-	-	-
PALNN1_CE	Cut_and_Paste	-	-	-	-	-	+	-
PALTA1_CE	Cut_and_Paste	-	-	-	-	-	-	-
PALTA2_CE	Cut_and_Paste	-	-	-	-	-	-	-
PALTTAA1_CE	Cut_and_Paste	-	-	-	-	-	-	-
PALTTAA3_CE	Cut_and_Paste	-	-	-	-	-	-	-
PALTTTAAA2	Cut_and_Paste	-	-	-	-	-	-	-
RCS5	Satellite	-	-	-	-	-	+	+
RTE1	LINE	-	-	-	-	-	+	+
SINE1_CE	SINE	-	-	-	-	-	-	-
TC2	Cut_and_Paste	-	-	-	-	-	-	-
Tc3	Cut_and_Paste	-	-	-	-	-	-	-
TC5B	Cut_and_Paste	-	-	-	-	-	-	-
Vingi-1_CE	LINE	-	-	-	-	-	+	+
