# Supplementary material for: A team of heterochromatin factors collaborates with small RNA pathways to combat repetitive elements and germline stress
Source: eLife journal article supplement (doi:10.7554/elife.21666), 2017-03-15
Supplement: supp [file elife-21666-supp-v1.zip › elife_poa_e21666_Figure_2_source_data_3.xls]

## Sheet: ChIP-seq
Sample	Fixation	Strain	Antibody ID	Antibody source	Reads - all	Reads - aligned (mapq0)	Reads - mapq10	Reads - unique mapq10
H3K9me2_YA_rep1	formaldehyde	N2	302-32369	WAKO	16.94M	14.50M[86%]	10.02M[59%]	8.49M[50%]
H3K9me2_YA_rep2	formaldehyde	N2	302-32369	WAKO	16.01M	12.17M[76%]	8.74M[55%]	7.38M[46%]
H3K9me3_YA_rep1	formaldehyde	N2	ab8898	Abcam	24.78M	23.69M[96%]	18.76M[76%]	15.43M[62%]
H3K9me3_YA_rep2	formaldehyde	N2	ab8898	Abcam	23.18M	22.18M[96%]	18.19M[78%]	15.50M[67%]
HPL-2_YA_rep1	EGS + formaldehyde	N2	Q2324	Strategic Diagnostics Incorporated	20.98M	14.68M[70%]	10.50M[50%]	6.93M[33%]
HPL-2_YA_rep2	EGS + formaldehyde	N2	Q2324	Strategic Diagnostics Incorporated	19.39M	14.16M[73%]	10.04M[52%]	7.18M[37%]
LET-418_YA_rep1	EGS + formaldehyde	N2	Q3861	Strategic Diagnostics Incorporated	22.12M	20.75M[94%]	17.83M[81%]	15.00M[68%]
LET-418_YA_rep2	EGS + formaldehyde	N2	Q3861	Strategic Diagnostics Incorporated	23.89M	22.39M[94%]	19.02M[80%]	15.93M[67%]
LIN-13_YA_rep1	EGS + formaldehyde	N2	Q0838	Strategic Diagnostics Incorporated	20.18M	18.64M[92%]	13.94M[69%]	10.17M[50%]
LIN-13_YA_rep2	EGS + formaldehyde	N2	Q0838	Strategic Diagnostics Incorporated	23.82M	21.16M[89%]	15.01M[63%]	10.42M[44%]
LIN-61_YA_rep1	EGS + formaldehyde	N2	Q3520	Strategic Diagnostics Incorporated	22.41M	19.84M[89%]	16.10M[72%]	13.00M[58%]
LIN-61_YA_rep2	EGS + formaldehyde	N2	Q3520	Strategic Diagnostics Incorporated	19.49M	17.66M[91%]	14.00M[72%]	11.73M[60%]
MET-2_YA_rep1	EGS + formaldehyde	N2	Q2943	Strategic Diagnostics Incorporated	20.84M	17.27M[83%]	12.09M[58%]	9.73M[47%]
MET-2_YA_rep2	EGS + formaldehyde	N2	Q2943	Strategic Diagnostics Incorporated	24.89M	21.24M[85%]	12.78M[51%]	9.62M[39%]
Summed_input_EGS_formaldehyde_fix	formaldehyde	N2	NA	NA	80.11M	77.66M[97%]	69.08M[86%]	41.33M[52%]
Summed_input_Formaldehyde_fix	EGS + formaldehyde	N2	NA	NA	143.89M	138.98M[97%]	124.00M[86%]	78.28M[54%]

## Sheet: RNA-seq
Sample	Strain	Growth condition	Name of bam file submitted to GEO	Reads - all	Reads - aligned	Reads - mapq10	Reads - rRNA
WT_YA_condition1_rep1	N2	condition1	N2_YA_RNAseq_condition1_rep1.bam	23.63M	21.97M[93%]	20.49M[87%]	0.01M[0%]
WT_YA_condition1_rep2	N2	condition1	N2_YA_RNAseq_condition1_rep2.bam	23.50M	21.82M[93%]	20.30M[86%]	0.01M[0%]
WT_YA_condition2_rep1	N2	condition2	N2_YA_RNAseq_condition2_rep1.bam	21.97M	20.44M[93%]	19.05M[87%]	0.01M[0%]
WT_YA_condition2_rep2	N2	condition2	N2_YA_RNAseq_condition2_rep2.bam	24.44M	22.70M[93%]	20.94M[86%]	0.02M[0%]
hpl-2(tm1489)_YA_rep1	hpl-2(tm1489)	condition1	hpl2_YA_RNAseq_rep1.bam	23.31M	21.61M[93%]	20.08M[86%]	0.02M[0%]
hpl-2(tm1489)_YA_rep2	hpl-2(tm1489)	condition1	hpl2_YA_RNAseq_rep2.bam	24.27M	22.48M[93%]	20.91M[86%]	0.02M[0%]
lin-13(n770)_YA_rep1	lin-13(n770)	condition2	let418ts_YA_RNAseq_rep1.bam	23.61M	21.85M[93%]	20.10M[85%]	0.03M[0%]
lin-13(n770)_YA_rep2	lin-13(n770)	condition2	let418ts_YA_RNAseq_rep2.bam	24.01M	22.26M[93%]	20.68M[86%]	0.02M[0%]
lin-61(tm2649)_YA-rep1	lin-61(tm2649)	condition1	lin13_YA_RNAseq_rep1.bam	27.11M	25.13M[93%]	23.31M[86%]	0.02M[0%]
lin-61(tm2649)_YA-rep2	lin-61(tm2649)	condition1	lin13_YA_RNAseq_rep2.bam	24.15M	22.42M[93%]	20.25M[84%]	0.02M[0%]
let-418(n3536)_YA_rep1	let-418(n3536)	condition1	lin61_YA_RNAseq_rep1.bam	24.63M	22.84M[93%]	21.16M[86%]	0.02M[0%]
let-418(n3536)_YA_rep2	let-418(n3536)	condition1	lin61_YA_RNAseq_rep2.bam	26.26M	24.35M[93%]	22.55M[86%]	0.02M[0%]
met-2(n4256)_set-25(n5021)_YA_rep1	met-2(n4256)_set-25(n5021)	condition1	nrde2_YA_RNAseq_rep1.bam	23.83M	22.13M[93%]	20.48M[86%]	0.01M[0%]
met-2(n4256)_set-25(n5021)_YA_rep2	met-2(n4256)_set-25(n5021)	condition1	nrde2_YA_RNAseq_rep2.bam	36.63M	34.13M[93%]	31.52M[86%]	0.03M[0%]
prg-1(n4357)_YA_rep1	prg-1(n4357)	condition2	nrde2let418ts_YA_RNAseq_rep1.bam	24.70M	22.98M[93%]	20.99M[85%]	0.02M[0%]
prg-1(n4357)_YA_rep2	prg-1(n4357)	condition2	nrde2let418ts_YA_RNAseq_rep2.bam	25.91M	24.13M[93%]	22.05M[85%]	0.03M[0%]
nrde2(gg91)_YA_rep1	nrde2(gg91)	condition2	prg1_YA_RNAseq_rep1.bam	27.13M	25.25M[93%]	23.28M[86%]	0.02M[0%]
nrde2(gg91)_YA_rep2	nrde2(gg91)	condition2	prg1_YA_RNAseq_rep2.bam	29.68M	27.74M[93%]	24.99M[84%]	0.01M[0%]
nrde2(gg91)_let-418(n3536)_YA_rep1	nrde2(gg91)_let-418(n3536)	condition2	set25met2_YA_RNAseq_rep1.bam	38.78M	35.50M[92%]	32.08M[83%]	0.16M[0%]
nrde2(gg91)_let-418(n3536)_YA_rep2	nrde2(gg91)_let-418(n3536)	condition2	set25met2_YA_RNAseq_rep2.bam	39.89M	36.90M[93%]	33.24M[83%]	0.11M[0%]
Samples were grown under condition 1 or condition 2:
condition 1 - starved L1s grown at 20C until L4 stage, shifted to 25C, then collected as young adults.
condition 2 - starved L1s were grown at 15C until L4 stage, shifted to 25C, then collected as young adults.
