# Supplementary material for: A team of heterochromatin factors collaborates with small RNA pathways to combat repetitive elements and germline stress
Source: eLife journal article supplement (doi:10.7554/elife.21666), 2017-03-15
Supplement: supp [file elife-21666-supp-v1.zip › elife_poa_e21666_Figure_3_source_data_1.xlsx]

## Sheet: Legend
Figure 3-source data 1: Analysis of repeats
Repeat expression data
A repeat element model based on Dfam 2.0 containing 62331 individual repeats was built.
Coordinates for the 62331 elements are listed.
DESeq2 results are given showing adjusted p-value (padj), maximum posterior estimates of log2 fold change (LFC), and RPKM values for each strain.
Mutants were grown under two conditions. Each condition had matching N2 replicates
Condition 1: grown at 20C to L4 stage, then shifted to 25C and collected as young adults
Condition 2: grown at 15C to L4 stage, then shifted to 25C and collected as young adults.
NA: data insufficient to calculate p-value
concave peaks
TRUE indicates overlap with concave peak from indicated factor
IDR peaks and H3K9me enrichment
TRUE indicates overlap with IDR peak from indicated factor or >1.5-fold enrichment (BEADS score) of H3K9me2 or H3K9me3 relative to the genome median.

## Sheet: Repeat expression data
coordinates	Family	padj_hpl-2	padj_let-418	padj_lin-13	padj_lin-61	padj_met-2 set-25	padj_nrde-2	padj_nrde2; let418	padj_prg-1	LFC_hpl-2	LFC_let-418	LFC_lin-13	LFC_lin-61	LFC_met-2 set-25	LFC_nrde-2	LFC_nrde-2; let-418	LFC_prg-1	rpkm_hpl-2_condition1	rpkm_let-418_condition1	rpkm_lin-13_condition2	rpkm_lin-61_condition1	rpkm_met-2 set-25_condition1	rpkm_nrde-2_condition2	rpkm_nrde-2; let-418_condition2	rpkm_prg-1_condition2	rpkm_N2_condition2	rpkm_N2_condition1
chrI:10773-11032	CELE1	NA	NA	NA	NA	NA	NA	NA	NA	0.743137	0.170031	0.294968	0.426227	0.333819	0.143621	0.407104	1.16021	21.4996	8.27613	8.72469	13.3914	11.6492	7.5691	10.4671	25.3229	6.99649	7.55712
chrI:14654-14917	CELE1	0.98709	NA	1	NA	NA	NA	NA	NA	-0.730237	-1.03093	0.255743	-0.436346	-1.27999	-0.347754	-0.436899	0.0890484	23.808	16.5269	27.4018	32.3075	12.6451	14.6049	13.0453	23.4157	28.0425	66.1451
chrI:29459-29722	CELE1	NA	NA	1	NA	NA	NA	NA	NA	-0.0171909	0.171251	0.94334	-0.161274	-0.123655	-0.186933	-0.411531	-0.137686	10.612	14.2609	34.8207	8.26585	8.82086	11.0297	7.89108	11.367	17.7068	14.6457
chrI:42542-42825	CELE1	NA	NA	NA	NA	NA	NA	NA	NA	0.407069	0.431805	1.50165	-0.27237	-0.110441	0.57773	0	0.939967	7.39267	7.78631	17.4847	0	1.63994	4.61964	0	8.19971	0	3.3479
chrI:83649-83975	CELE1	NA	NA	NA	NA	NA	NA	NA	NA	-0.251354	-0.245527	-0.561011	0.00757223	0.365024	0.187562	-0.494529	0.0657869	0	0	3.7308	2.29225	5.93603	10.9108	4.16123	9.3146	11.5139	2.90766
chrI:126845-127164	CELE1	NA	NA	NA	NA	NA	NA	NA	NA	-0.456858	-0.189183	0.826543	0.00213821	-0.286085	0.251012	0.630577	0.968649	0	2.42744	6.12062	4.47693	1.5775	1.47479	4.25225	7.41785	0	5.94252
chrI:131604-131770	CELE1	NA	NA	1	NA	NA	NA	NA	NA	0.448769	0.205483	0.0233739	-0.22027	0.444132	-0.569183	-0.412846	0.829711	20.8608	13.9542	21.4021	4.09013	20.2237	9.57995	11.9696	49.8831	27.7384	11.7656
chrI:131812-132053	CELE1	NA	NA	NA	NA	NA	NA	NA	NA	-0.358744	-0.148794	-0.0869	-0.00648733	-0.347328	-0.0915041	0.227355	1.26535	5.80204	9.13765	5.0412	11.8398	6.25783	5.4214	8.37615	27.7641	7.69166	16.1078
chrI:134700-135019	CELE1	NA	NA	NA	NA	NA	NA	NA	NA	-0.421821	-0.180392	0.502075	-0.200273	-0.44266	0.21929	0	0.256993	0	2.42744	4.08041	2.13454	0	1.47479	0	1.81931	0	6.14016
chrI:259705-260043	CELE1	NA	NA	NA	NA	NA	NA	NA	NA	-0.00924714	0.219265	-0.368943	-0.257896	-0.286447	-0.379069	-0.0179717	0.21575	2.0514	4.40722	0	0	0	0	1.96551	3.70013	2.80778	2.89801
chrI:290669-290972	CELE1	NA	NA	NA	NA	NA	NA	NA	NA	0.151111	-0.182468	-0.887706	-0.439209	0.0799113	0.081694	-1.09006	-0.63468	9.17212	4.91463	3.73095	2.24688	8.04565	14.5771	2.28426	6.04119	18.508	9.59097
chrI:294566-294902	CELE1	NA	NA	NA	NA	NA	NA	NA	NA	-0.0047935	0.379329	-1.35384	-0.241808	0.468177	-1.04962	-0.940052	-0.474996	2.08323	6.38515	0	0	7.3737	1.40039	2.06058	5.31612	13.8712	2.82138
chrI:298053-298143	CELE1	NA	NA	NA	NA	NA	NA	NA	NA	-0.209477	-0.188127	1.24228	-0.197782	0.0269391	1.13446	0	0.872925	7.7148	8.53607	33.0445	8.23699	16.6417	27.9529	0	20.1816	0	21.2443
chrI:309819-310130	CELE1	NA	NA	1	NA	NA	NA	NA	NA	-0.0242495	-0.337969	-0.420859	0.595767	0.387784	-0.358986	-0.996737	-1.36934	8.91572	4.78861	10.1877	20.5562	15.8039	10.8454	4.36129	2.01017	21.0842	12.4938
chrI:333714-333776	CELE1	NA	NA	NA	NA	NA	NA	NA	NA	-0.7103	0.0146758	1.16831	-0.433696	-0.186112	1.09762	1.07845	0.59262	0	35.1002	47.7309	10.8421	22.7981	43.298	42.7513	19.9102	0	45.7783
chrI:342949-343040	CELE1	NA	NA	NA	NA	NA	NA	NA	NA	0.227931	0	-0.0338186	0	0.322319	-0.0417821	-0.362092	-0.0558702	7.63094	0	7.09637	0	10.5493	7.13031	0	6.32804	10.3461	0
chrI:352171-352550	CELE1	NA	NA	1	NA	NA	NA	NA	NA	-0.468271	-0.625925	-0.71712	-0.469314	0.101893	-0.433986	-0.451065	-0.406954	5.52505	3.9317	6.4209	5.39251	12.5647	8.69347	8.9891	9.42911	19.7048	15.2623
chrI:385928-386010	CELE1	NA	NA	NA	NA	NA	NA	NA	NA	-0.492649	0.202373	-0.349566	-0.218429	-0.144106	-0.37745	0.350662	-0.321463	0	27.3594	13.6652	9.03092	11.6933	13.5894	40.8163	15.1126	33.8942	23.6729
chrI:389844-390182	CELE1	NA	NA	NA	NA	NA	NA	NA	NA	-0.347086	-0.527251	0.631468	-0.326563	-0.345782	0.193569	0.398755	-0.361372	4.12234	2.29139	10.7962	4.42222	4.12161	5.56851	8.02786	1.71734	5.61556	11.4988
chrI:397552-397701	CELE1	NA	NA	NA	NA	NA	NA	NA	NA	-0.00422356	0.00383495	0	-0.00531208	-0.256942	0	0.329573	0	4.63617	4.78177	0	4.55367	0	0	4.62943	0	0	6.33869
chrI:404266-404599	CELE1	NA	NA	NA	NA	NA	NA	NA	NA	0.781869	0.221238	0.492671	-0.00321035	0.397511	-0.385163	-0.0164213	0.0693149	14.6541	6.62069	15.124	4.28927	8.71743	4.78997	8.23219	9.25409	11.0194	5.78811
chrI:411596-411920	CELE1	NA	NA	NA	NA	NA	NA	NA	NA	-0.00835899	0.90957	0.685594	0.421939	0.38379	-0.138356	-0.0141482	-0.0905766	2.16014	13.7912	11.2613	6.50975	6.09273	3.47052	4.27332	3.72108	5.72733	2.92555
chrI:447332-447637	CELE1	NA	NA	NA	NA	NA	NA	NA	NA	0.875824	0.78851	0.260637	0.751517	0.619113	-1.02638	-0.267398	0.44555	13.7007	12.3035	9.54669	11.5957	9.64274	0	4.4468	12.1505	9.05531	3.21054
chrI:459220-459541	CELE1	NA	NA	NA	NA	NA	NA	NA	NA	0.161178	0.49252	-0.336214	0.61035	0.34033	-0.13258	0.508123	0.259342	6.47912	11.3225	3.78873	13.5539	8.921	5.54009	12.5029	9.17978	8.7367	6.10202
chrI:460121-460224	CELE1	NA	NA	NA	NA	NA	NA	NA	NA	-0.00820611	0.00978188	-0.342025	-0.228947	-0.24631	-0.110086	-0.69764	0.163872	6.68679	7.46906	6.27756	0	0	10.8454	0	17.6589	17.8979	9.4464
chrI:497119-497419	CELE1	NA	NA	NA	NA	NA	NA	NA	NA	-0.0170309	-0.173901	0.0569087	0.312823	0.568436	-0.883	-0.494474	0.357273	6.93115	4.96361	9.99019	11.7883	16.1219	2.17936	4.52067	14.137	12.5085	9.5815
chrI:613966-614027	CELE1	NA	NA	NA	NA	NA	NA	NA	NA	-0.228957	0.00932281	0	-0.228191	-0.239856	0.598903	0	0	0	12.5287	0	0	0	21.1609	0	0	0	15.8456
chrI:614029-614363	CELE1	NA	NA	NA	NA	NA	NA	NA	NA	0	0.47132	0.391579	0.257576	0.17999	0	0	0	0	4.45984	1.69285	2.23751	1.50686	0	0	0	0	0
chrI:615408-615660	CELE1	NA	NA	NA	NA	NA	NA	NA	NA	-0.00540196	0.0177676	0.986573	0.36587	0.466488	0.418163	-0.0243009	0.661105	2.77489	3.07029	14.4661	8.09942	9.6675	7.05102	2.63362	9.73792	3.7622	3.75812
chrI:616694-616751	CELE1	NA	NA	NA	NA	NA	NA	NA	NA	0	0	0.247911	0	0.392283	0	0	0	0	0	9.77767	0	16.7335	0	0	0	0	0
chrI:622556-622617	CELE1	NA	NA	NA	NA	NA	NA	NA	NA	-0.179246	-0.55596	0.112248	-0.17403	-0.517134	0.238541	-0.940585	-0.0915991	33.97	12.5287	39.3539	34.1237	15.6539	46.965	0	29.6213	44.0102	62.8722
chrI:655147-655497	CELE1	NA	NA	1	NA	NA	NA	NA	NA	-0.281234	-0.0876367	-0.0221787	-0.255856	0.187708	-0.49707	-0.170799	-0.763665	7.92508	10.8957	13.6585	8.35256	15.5973	7.77143	11.6301	5.36044	18.7415	16.4332
chrI:658006-658135	CELE1	NA	NA	NA	NA	NA	NA	NA	NA	-0.252001	0.221443	0.612943	-0.250321	-0.079818	0.259869	0.868537	0.323795	0	11.4927	10.0441	0	3.58263	3.63024	15.5925	4.8244	0	7.31387
chrI:679481-679816	CELE1	NA	NA	NA	NA	NA	NA	NA	NA	0	0	0	0	0.271038	0.398262	0	0.264395	0	0	0	0	1.50238	2.80911	0	1.86658	0	0
chrI:704674-704969	CELE1	NA	NA	NA	NA	NA	NA	NA	NA	-0.0162224	0.679459	-0.275443	0.656478	-0.0196046	-0.750431	-0.638097	-0.116923	4.69882	14.9413	8.24305	14.5198	4.98425	3.81054	4.50207	10.1381	15.6497	6.53118
chrI:706987-707300	CELE1	NA	NA	NA	NA	NA	NA	NA	NA	0.931481	1.09884	0.488329	0.476462	0.610203	0.188336	0.29712	0.469125	11.1158	14.2743	5.96445	4.77431	6.43055	3.5921	4.33351	5.70551	2.89664	0
chrI:756369-756582	CELE1	NA	NA	NA	NA	NA	NA	NA	NA	-0.810258	-0.806013	0.404174	-0.808726	-0.832775	-0.039765	-0.322897	0.17217	0	0	9.15233	0	0	3.06537	0	5.44093	4.44784	17.9198
chrI:903769-904039	CELE1	NA	NA	NA	NA	NA	NA	NA	NA	-0.0146146	-0.339118	0.339873	-0.168184	0.13577	-0.884417	-0.764089	0.0653781	10.3135	5.29347	15.2814	7.8069	12.895	1.74144	2.4587	11.0734	13.5811	14.1507
chrI:931250-931303	CELE1	NA	NA	NA	NA	NA	NA	NA	NA	NA	NA	NA	NA	NA	NA	NA	NA	0	0	0	0	0	0	0	0	0	0
chrI:1012043-1012186	CELE1	NA	NA	NA	NA	NA	NA	NA	NA	-0.492871	-0.217542	0	-0.229213	0.0191769	0.796827	0.386385	1.06262	0	4.98101	0	4.74341	9.97418	11.1101	4.82233	16.7965	0	13.4252
chrI:1024483-1024533	CELE1	NA	NA	NA	NA	NA	NA	NA	NA	0	0.326125	0.301952	0	0	0.262511	0.834104	0	0	14.064	11.1197	0	0	9.25355	40.2968	0	0	0
chrI:1051590-1051901	CELE1	NA	NA	NA	NA	NA	NA	NA	NA	-0.336253	-0.124559	-0.0970912	-0.519777	-0.033929	0.698442	-0.298675	0.62964	6.72923	9.57722	3.63529	4.59172	10.6997	12.358	2.1356	11.34	5.83041	15.3386
chrI:1056516-1056860	CELE1	NA	NA	1	NA	NA	NA	NA	NA	0.515055	-0.115233	0.659363	0.337381	-0.202913	-0.000890438	0.570857	0.324872	22.269	10.7402	16.935	18.3971	9.90266	8.44008	15.695	11.9428	10.7906	16.8107
chrI:1110741-1110834	CELE1	NA	NA	NA	NA	NA	NA	NA	NA	NA	NA	NA	NA	NA	NA	NA	NA	0	0	0	0	0	0	0	0	0	0
chrI:1140309-1140560	CELE1	NA	NA	NA	NA	NA	NA	NA	NA	-0.242755	0.789562	0.450779	-0.241729	-0.368974	-0.333966	-0.627167	0.335059	2.7859	20.3964	11.2521	2.71052	1.84818	2.60313	0	9.77657	7.2186	7.67154
chrI:1147614-1147829	CELE1	NA	NA	1	NA	NA	NA	NA	NA	-0.154218	-0.270896	0.555908	0.112105	0.433354	0.547548	0.87913	0.0237039	13.0009	10.5131	24.8205	19.2816	28.754	24.405	34.7131	13.4764	17.4308	22.1557
chrI:1179565-1179846	CELE1	NA	NA	NA	NA	NA	NA	NA	NA	-0.357411	-0.136873	0.4891	-0.357412	-0.443114	-0.0808327	0.203768	0.129573	2.46605	5.50909	11.2715	2.42217	1.65157	4.6524	7.3874	6.51249	6.75062	10.1149
chrI:1205196-1205481	CELE1	NA	NA	NA	NA	NA	NA	NA	NA	-0.509627	-0.45799	-0.53323	-0.65556	-1.0714	-0.199872	0.310928	0.337692	12.2041	13.1639	3.96577	9.78573	5.02196	7.24399	14.5681	14.8784	12.8688	30.5838
chrI:1205647-1205812	CELE1	NA	NA	NA	NA	NA	NA	NA	NA	0.483361	0.890594	0.308097	0.84449	0.229312	-0.591689	-0.0378947	-0.304488	21.146	36.0011	25.464	33.7195	14.4989	5.68592	16.2249	10.5213	22.9358	11.646
chrI:1221358-1221631	CELE1	NA	NA	NA	NA	NA	NA	NA	NA	-0.493321	0.363236	0.222243	-0.231685	0.136636	0.17498	0.282968	0.818541	0	10.9055	4.45245	2.49289	6.94169	4.1165	4.96614	11.1163	3.3195	7.17099
chrI:1231959-1232238	CELE1	NA	NA	NA	NA	NA	NA	NA	NA	-0.219599	0.00299876	-0.323177	-0.218624	-0.0660075	0.175871	-0.317942	-0.323526	0	2.56166	0	0	1.66336	4.02829	0	0	3.24837	3.39573
chrI:1375099-1375410	CELE1	NA	NA	NA	NA	NA	NA	NA	NA	0.556612	0.597239	-0.706972	0.219955	0.795084	-0.341217	-0.929923	-0.496371	8.91572	9.57722	3.91016	4.59172	12.4428	7.23026	2.22569	5.59788	15.1182	3.04745
chrI:1379772-1379981	CELE1	NA	NA	NA	NA	NA	NA	NA	NA	0.183271	-0.224519	0.350492	0.514819	0.135344	0.21347	-0.688383	-0.360177	9.99771	3.41555	11.6188	16.8966	9.05725	8.98917	0	2.98653	8.86372	9.20585
chrI:1400933-1401081	CELE1	NA	NA	NA	NA	NA	NA	NA	NA	-0.0133932	-0.71872	0.110697	-0.20264	-0.362593	-0.636023	-0.899247	-0.925152	14.0463	0	16.3754	9.61488	6.51369	3.16732	0	0	18.5968	19.3559
chrI:1401141-1401272	CELE1	NA	NA	NA	NA	NA	NA	NA	NA	0.176557	-0.219438	-0.028589	0.00901828	-0.155027	0.316789	-0.352502	-0.370904	15.8553	5.43382	4.94595	11.3571	7.35258	10.7257	0	0	6.89048	14.6457
chrI:1401659-1402013	CELE1	NA	NA	NA	NA	NA	NA	NA	NA	0.665062	0.601896	0.510101	-0.0192376	0.382221	0.377902	-0.0164342	-0.93242	15.7648	14.6462	11.4239	5.77226	11.0457	10.0502	5.78912	0	7.80542	8.21311
chrI:1407688-1407973	CELE1	NA	NA	NA	NA	NA	NA	NA	NA	-0.173072	-0.312714	0.854516	-0.771312	-0.71263	0.182536	0.543627	0.471309	9.74939	7.73186	10.814	2.38829	3.3935	3.94378	7.18579	6.42141	3.18022	16.9541
chrI:1437893-1438166	CELE1	NA	NA	NA	NA	NA	NA	NA	NA	-0.200083	0.452852	0.183292	0.31141	0.0697556	-0.574114	-0.466404	-1.16226	5.12443	15.9237	12.7314	13.1927	9.06911	4.1165	4.96614	0	13.7411	10.5257
chrI:1440006-1440143	CELE1	NA	NA	NA	NA	NA	NA	NA	NA	-0.443677	-0.440551	-0.050464	-0.442548	-0.263279	0.184435	-0.00167315	-0.0326725	0	0	4.10946	0	3.65796	8.17333	5.03199	4.54472	6.5909	14.0089
chrI:1441882-1442037	CELE1	0.98709	NA	1	NA	NA	0.999728	NA	NA	0.756274	0.851454	-1.11685	-0.205145	0.834612	-0.648013	0.185953	-0.0872594	107.328	116.472	18.1764	40.2596	114.47	31.9462	69.7806	54.5542	78.5064	68.8682
chrI:1526750-1526948	CELE1	NA	NA	NA	NA	NA	NA	NA	NA	-0.195733	-0.186427	-0.40228	-0.197016	0.13799	0.601454	0.284358	-0.0392537	3.52787	3.60435	0	3.43242	10.1467	11.3359	6.8378	3.15162	4.57057	9.87362
chrI:1558070-1558416	CELE1	NA	NA	1	NA	NA	0.999728	NA	NA	-0.550282	-0.0915444	0.882468	-0.393583	-0.545649	0.856166	1.36588	0.881878	8.0546	14.9839	24.6104	10.0339	8.27828	24.1135	37.4557	24.6555	13.4715	22.4673
chrI:1573291-1573578	CELE1	NA	NA	NA	NA	NA	NA	NA	NA	-0.0298325	-0.12072	0.35041	-0.434438	0.0926189	-0.254032	0.308152	-0.558507	14.534	12.6592	14.6771	7.57703	16.9853	6.5546	14.0766	4.19914	12.9263	20.4672
chrI:1583858-1584202	CELE1	NA	NA	NA	NA	NA	NA	NA	NA	0.199303	-0.244852	0.620216	-0.24775	-0.0685625	0.262768	0.8793	0	4.05065	0	3.78473	0	1.46318	1.36792	5.87544	0	0	2.75595
chrI:1685507-1685644	CELE1	NA	NA	NA	NA	NA	NA	NA	NA	0.183557	0.0209772	0.0381428	0.190968	0.496149	-1.04123	-0.957519	-0.502152	15.2139	10.8264	26.5211	15.3309	24.4736	4.75354	5.03199	12.9821	33.8739	13.7798
chrI:1711147-1711325	CELE1	NA	NA	1	NA	NA	NA	NA	NA	-0.0197357	0.73443	0.122516	-0.287256	0.172992	0.812409	0.360152	0.713595	23.4953	55.4168	26.7828	16.0069	29.712	50.9898	33.8155	47.0417	30.9601	32.2238
chrI:1845629-1845941	CELE1	NA	NA	NA	NA	NA	NA	NA	NA	0.397951	-0.883042	-0.610811	-0.377615	-0.0937093	0.159359	-0.565739	0.266402	15.6161	0	2.08583	4.57705	7.81431	8.12688	2.21858	9.58748	8.98792	12.2519
chrI:1863357-1863677	CELE1	NA	NA	NA	NA	NA	NA	NA	NA	0.242034	-0.302625	0.56544	-0.320104	0.0620416	-0.229301	-0.92595	-0.128378	15.2476	6.88882	19.9678	6.79808	11.9723	7.92434	2.16329	9.20838	14.4309	14.9085
chrI:1878701-1878820	CELE1	NA	NA	NA	NA	NA	NA	NA	NA	-0.0123733	-0.000908944	-0.0527222	0.00491318	0.121294	-0.337835	-0.00837786	-0.310008	11.7008	11.9544	16.3216	12.4928	16.8266	9.39933	17.3604	9.703	23.091	16.3738
chrI:1882328-1882638	CELE1	NA	NA	1	NA	NA	NA	NA	NA	0.565965	0.0197383	-0.933282	-0.209902	0.731	-0.714534	-1.04002	-0.94723	15.7378	7.11033	7.84547	4.39261	18.5987	10.2884	6.69854	7.63251	30.0617	9.27341
chrI:1962674-1962971	CELE1	NA	NA	NA	NA	NA	NA	NA	NA	-0.537155	0.957198	-0.338283	0.685685	-0.0156751	-0.354609	-0.304842	0.513733	0	20.254	2.19083	14.6455	4.9508	2.2013	2.33025	10.2211	6.24624	6.48734
chrI:1989019-1989260	CELE1	NA	NA	NA	NA	NA	NA	NA	NA	0.695021	0	-0.0419923	0.215225	0.287136	0.607215	-0.0133697	0.199546	11.6041	0	2.69779	2.82253	3.8491	10.0822	2.75333	4.8114	3.75845	0
chrI:2001277-2001434	CELE1	NA	NA	NA	NA	NA	NA	NA	NA	0.269803	-0.351016	-0.283776	-0.597737	-0.376415	-0.131292	-0.0171423	-0.495787	26.4924	9.45599	7.17854	4.74409	9.33759	10.1256	12.6514	3.96944	17.2698	24.2711
chrI:2009105-2009499	CELE1	NA	NA	NA	NA	NA	NA	NA	NA	0.497083	0.796063	0.0106838	0.782336	0.671248	-0.251059	-0.182829	-0.439628	8.86991	13.0124	10.7013	12.9467	11.1062	8.30366	8.50542	6.1233	14.03	4.89425
chrI:2014249-2014539	CELE1	NA	NA	NA	NA	NA	NA	NA	NA	0.35912	0.39057	0.824246	-0.0101123	0.0709042	0.313548	0.628218	0.57521	7.2376	7.80354	6.73058	2.34726	3.46941	2.25426	4.67602	4.15585	0	3.37603
chrI:2136892-2137003	CELE1	0.98709	0.966688	1	0.613968	0.94417	0.999728	0.835051	0.873827	-0.214536	-0.28967	-0.0131589	-0.677717	0.0997226	0.284203	0.441311	0.46166	205.907	194.223	191.472	140.703	263.078	239.548	273.736	276.725	257.035	327.958
chrI:2373500-2373864	CELE1	NA	NA	NA	NA	NA	NA	NA	NA	0.211153	0.218076	-0.306514	0	0.288029	-0.311355	-0.00740187	-0.30695	1.90528	1.96511	0	0	2.55201	0	1.8255	0	2.4919	0
chrI:2375651-2376180	CELE1	0.98709	0.511013	1	0.301466	0.100645	0.402576	0.300869	0.0762982	0.695568	0.798636	0.365636	0.863844	1.0024	1.06005	0.971634	1.35112	72.5416	78.257	39.1311	82.5058	91.2656	65.6699	61.7767	81.5504	38.6324	56.508
chrI:2386716-2386982	CELE1	NA	NA	NA	NA	NA	NA	NA	NA	-0.887991	-0.355114	-0.494426	-0.610731	0.0320236	-0.827119	-0.222335	0.105822	0	5.59568	2.44519	2.55824	10.9049	0	4.99106	9.22732	10.2196	14.5995
chrI:2387343-2387679	CELE1	NA	NA	NA	NA	NA	NA	NA	NA	0.308166	0.629562	0.262101	0.00253605	0.287957	0.181221	-0.0354988	0.675702	10.3572	15.7817	8.92299	6.47532	10.0218	8.09428	5.93151	14.2208	8.34783	8.55796
chrI:2393899-2394124	CELE1	NA	NA	NA	NA	NA	NA	NA	NA	0.134111	-0.597675	0.231852	0.415443	0.786097	0.300392	-0.0239994	0.502516	15.4441	3.17374	12.926	22.0394	32.4674	14.158	9.09353	18.0321	12.4479	17.1082
chrI:2395150-2395436	CELE1	0.98709	NA	1	NA	NA	0.999728	NA	NA	0.127036	-0.0265165	0.114578	0.536824	0.00883584	0.358816	0.16445	0.500036	56.0309	48.7287	27.1818	78.7084	50.7251	33.4464	28.5451	38.2374	32.4282	67.3599
chrI:2412142-2412285	CELE1	NA	NA	NA	NA	NA	NA	NA	NA	-0.00349439	-0.216067	-0.0146461	-0.217766	-0.0656952	-0.302131	-0.293442	-0.0219872	4.82935	0	4.53379	0	3.23432	0	0	4.35536	6.31628	6.6028
chrI:2413772-2414116	CELE1	NA	NA	1	NA	NA	NA	NA	NA	1.09257	0.0190846	0.00621348	-0.245321	0.606507	0.059544	0.349657	-0.6653	20.2916	4.33057	12.2522	1.97986	11.1394	13.0773	17.5449	5.32326	16.1859	5.60356
chrI:2417616-2417956	CELE1	NA	NA	NA	NA	NA	NA	NA	NA	-0.189793	0.0206194	0.494284	-0.898716	-0.743868	-0.103572	-0.00304933	0.161004	6.13753	8.76274	9.06982	0	1.48035	3.30768	4.07282	5.51764	5.33457	11.3386
chrI:2436220-2436349	CELE1	NA	NA	NA	NA	NA	NA	NA	NA	-0.443656	-0.440579	0.260401	-0.442545	-0.273199	0	0	0	0	0	5.02205	0	3.58263	0	0	0	0	14.871
chrI:2452187-2452364	CELE1	NA	NA	NA	NA	NA	NA	NA	NA	-0.18455	-0.870507	-0.0518596	-0.876133	-0.927127	-0.376954	-0.350618	0.426566	11.7579	0	3.18598	0	0	0	0	10.3175	5.1098	21.8993
chrI:2476881-2477137	CELE1	0.98709	NA	1	NA	NA	NA	NA	NA	-0.216695	0.401711	0.72493	-0.816895	0.169229	0.235384	-0.504595	0.302123	24.508	46.2757	39.6442	11.1488	36.7118	24.1842	10.5893	26.4938	25.5964	41.6802
chrI:2578228-2578579	CELE1	NA	NA	1	NA	NA	NA	NA	NA	-0.609335	-0.573225	-0.625702	-0.599275	-0.400547	-0.253972	-0.0382429	-0.149889	5.94573	6.28214	6.68801	6.01042	8.38261	10.4308	13.4101	11.8331	18.5681	19.1775
chrI:2579630-2579962	CELE1	NA	NA	NA	NA	NA	NA	NA	NA	-0.218822	0.00927536	-0.102385	0.34903	0.255654	-0.695211	-0.967914	-0.102403	2.08837	4.3079	5.36659	8.80405	7.22769	1.41721	0	5.37997	8.4481	5.71053
chrI:2585101-2585244	CELE1	NA	NA	NA	NA	NA	NA	NA	NA	-0.542827	-0.78218	-0.138615	-0.787138	-0.321862	-1.19509	-0.0338863	-0.109989	4.87533	0	15.7529	0	9.70295	0	18.7037	16.7965	26.1462	26.8504
chrI:2585506-2585714	CELE1	0.98709	NA	1	NA	NA	0.999728	NA	NA	0.581192	0.305924	-0.40129	0.477543	0.120454	-1.00197	-0.348454	-0.104834	60.1782	46.8927	40.4499	54.837	39.1914	22.9644	42.5208	52.5079	75.8033	46.4008
chrI:2607694-2608043	CELE1	NA	NA	NA	NA	NA	NA	NA	NA	0.336494	-0.216739	0.396834	-0.0137836	-0.344224	-0.983854	-0.562969	-0.962798	7.98556	2.04933	10.2119	3.90315	1.33069	0	1.90373	0	8.1586	5.52351
chrI:2643869-2643994	CELE1	NA	NA	NA	NA	NA	NA	NA	NA	0	0	-0.278027	0.421736	0.466035	-0.280884	-0.274139	0.16476	0	0	0	10.8421	11.709	0	0	9.24095	7.2186	0
chrI:2688423-2688722	CELE1	0.630664	0.968173	1	0.574078	0.00344684	0.999728	0.94925	0.759337	1.25441	0.282335	0.482067	0.805447	1.99881	0.319379	0.222915	0.56178	79.1901	34.2659	101.554	54.8061	141.054	89.6987	83.8643	108.242	93.633	35.4952
chrI:2769357-2769676	CELE1	NA	NA	NA	NA	NA	NA	NA	NA	-0.0226045	0.18054	-0.516692	0.282704	0.268675	-0.536515	-0.473149	-1.55679	6.51962	9.52379	8.16082	11.0884	10.7984	7.37393	8.50451	0	20.4249	9.21024
chrI:2823961-2824098	CELE1	NA	NA	NA	NA	NA	NA	NA	NA	0.486999	0.164266	0.76624	0.392656	0.619315	0.184967	-0.275854	0.099105	40.5544	26.4191	38.228	36.0935	46.9874	19.7665	9.65662	17.8529	20.3856	28.0178
chrI:2832430-2832728	CELE1	NA	NA	NA	NA	NA	NA	NA	NA	-0.0138383	-0.457975	0.274744	-0.219153	-0.303804	0	0	0.515879	4.67382	0	1.89667	2.28445	1.55766	0	0	4.04465	0	6.57141
chrI:2868555-2868754	CELE1	NA	NA	1	NA	NA	NA	NA	NA	-0.464479	-0.548855	0.324107	-0.572732	-0.531136	0.140572	-0.33555	-0.431855	20.9952	18.8244	30.0705	18.4066	19.4108	23.5966	13.6072	11.8686	27.7092	48.3307
chrI:2949153-2949491	CELE1	NA	NA	NA	NA	NA	NA	NA	NA	-0.46972	-0.876409	-0.101823	-0.893022	-0.508164	-0.669941	-0.255822	-0.612275	6.19327	2.11583	5.27161	2.0149	5.7259	1.39213	4.09684	1.71734	8.29858	17.0149
chrI:2998586-2998894	CELE1	NA	NA	NA	NA	NA	NA	NA	NA	-0.0241011	-0.256411	-0.144026	-0.0294682	-0.530126	0.0392901	-0.0264229	0.211376	13.5677	9.67021	7.34116	13.2631	6.28181	10.0191	8.80726	11.8869	12.0478	18.8715
chrI:3003121-3003412	CELE1	NA	NA	NA	NA	NA	NA	NA	NA	-0.00460545	-0.260396	0	0.220894	0.242024	0.231854	0.30968	0.271537	2.40427	0	0	4.90622	4.91877	1.6162	2.37813	1.99377	0	3.25618
chrI:3027038-3027379	CELE1	NA	NA	1	NA	NA	NA	NA	NA	-0.314665	-0.268518	0.0227592	-0.011934	0.0239652	-0.365862	-0.211105	-0.114569	8.17235	8.73712	10.4507	12.3723	12.9416	6.59602	7.87525	9.03762	13.5448	16.9581
chrI:3053048-3053213	CELE1	NA	NA	NA	NA	NA	NA	NA	NA	0.43051	0.462434	0	0	0.322047	0	0	1.07325	8.37862	9.35882	0	0	5.84663	0	0	14.5705	0	0
chrI:3060968-3061126	CELE1	NA	NA	NA	NA	NA	NA	NA	NA	-0.457519	0.0177283	0.65391	-0.00592805	-0.493489	0.704999	0	0.273392	0	9.77084	10.7001	9.01017	0	12.3771	0	3.94448	0	12.3575
chrI:3079788-3080036	CELE1	NA	NA	NA	NA	NA	NA	NA	NA	-0.164383	0.158786	0.174279	-0.313519	0.102238	-0.124177	-0.0123285	0.361751	8.37862	15.598	7.52143	5.75348	13.8774	4.5298	5.46475	9.71367	7.30557	15.7819
chrI:3118009-3118358	CELE1	NA	NA	1	NA	NA	NA	NA	NA	-0.0114183	0.0193227	1.18715	-0.0124184	0.516279	1.03977	0.230934	-0.0992337	5.96079	6.31803	17.9182	5.85472	13.9764	15.0614	5.87182	3.45529	5.19739	8.14974
chrI:3136492-3136832	CELE1	NA	NA	NA	NA	NA	NA	NA	NA	1.26991	0.77055	0.3685	0.864911	0.325234	0.456962	-0.02616	0.900628	20.4326	11.2152	7.65825	12.6037	5.57778	8.53909	3.90796	14.3179	5.45859	2.88101
chrI:3141279-3141632	CELE1	NA	NA	NA	NA	NA	NA	NA	NA	-0.2239	0.194299	0.638845	-0.475496	0.00204487	-0.419216	-0.0201987	0.222982	1.96448	6.24664	7.13475	0	3.94696	0	1.88222	3.54334	2.68881	5.4611
chrI:3142469-3142628	CELE1	NA	NA	NA	NA	NA	NA	NA	NA	-0.213083	0.00155937	0.580657	-0.458541	-0.491712	0.314871	0.630328	0.318452	4.38779	8.96581	7.62482	0	0	4.09993	8.50451	3.91982	0	12.0827
chrI:3143836-3144177	CELE1	NA	NA	NA	NA	NA	NA	NA	NA	-0.0126557	0.881903	0	0.221136	0.0717738	0.769388	0.352475	0.989191	2.03341	13.1057	0	4.18894	2.95204	5.21611	2.03045	7.33534	0	2.87259
chrI:3149600-3149765	CELE1	NA	NA	NA	NA	NA	NA	NA	NA	0.41673	0.912685	0	0.611149	0.366971	0.510878	0.324997	0.529672	12.6477	26.6423	0	17.6611	11.6933	6.7947	4.01389	7.01421	0	5.72773
chrI:3166986-3167176	CELE1	NA	NA	NA	NA	NA	NA	NA	NA	-0.622484	-0.17165	0.579138	-0.619947	-0.288479	0	0.62708	0.587594	0	7.51063	6.38728	0	5.28585	0	7.1242	6.56724	0	15.2652
chrI:3184781-3184845	CELE1	NA	NA	NA	NA	NA	NA	NA	NA	0.260739	0.275501	-0.269023	0.67641	0.89414	-0.0393477	-0.43589	-0.76858	10.6989	11.0348	28.8129	32.5487	45.395	39.1341	21.3666	9.6488	56.6226	0
chrI:3191437-3191599	CELE1	NA	NA	NA	NA	NA	NA	NA	NA	-1.1171	-0.295636	-0.104181	-0.919927	-1.31302	-0.921683	-0.238695	0.0712019	8.57345	31.5331	14.969	12.5715	5.95423	2.89528	12.4358	18.6863	22.839	59.4955
chrI:3195322-3195740	CELE1	NA	NA	NA	NA	NA	NA	NA	NA	0.173617	0.992579	-0.362615	0.356581	0.258544	0.670667	-0.31609	0.525481	4.97918	15.8328	1.55815	6.83827	5.93063	8.32357	1.65732	7.26939	4.44244	4.61391
chrI:3206985-3207295	CELE1	NA	NA	NA	NA	NA	NA	NA	NA	-0.374186	-0.154097	0.29026	-0.584878	-0.536204	-0.125876	-0.255574	-0.103527	4.49348	7.11033	10.2205	2.41018	2.99512	5.73604	4.46569	5.76055	9.04572	12.4323
chrI:3208358-3208680	CELE1	NA	NA	NA	NA	NA	NA	NA	NA	-0.427109	0.334311	-0.719564	-0.206283	-0.549684	-1.41682	-0.96497	-0.10161	2.15302	11.656	3.777	4.22942	1.44192	0	2.06287	9.42995	14.2106	9.02679
chrI:3255101-3255395	CELE1	NA	NA	NA	NA	NA	NA	NA	NA	-1.25036	-0.722699	-0.0626379	-1.24646	-1.08795	-0.546108	-0.0310118	-0.108962	0	5.26632	6.63931	0	1.57879	2.22369	6.87128	5.92047	9.6797	22.883
chrI:3276932-3277276	CELE1	NA	NA	NA	NA	NA	NA	NA	NA	-0.192083	-0.38495	0.425104	-0.396677	-0.49154	0.569914	0.272758	-0.0689885	4.05065	2.07903	5.17993	1.97986	1.34998	6.53867	4.02559	1.68748	2.75895	8.54283
chrI:3286608-3286946	CELE1	NA	NA	NA	NA	NA	NA	NA	NA	0.202439	0.571869	0.12609	0.407757	0.0700225	-0.382772	-0.00874466	-0.0636564	4.12234	8.81444	5.01863	6.63333	2.97816	1.39213	4.01393	3.56741	5.36604	2.80473
chrI:3304331-3304639	CELE1	NA	NA	NA	NA	NA	NA	NA	NA	-0.430196	0.176878	0.52935	-0.427652	-0.0415947	-0.14055	0.438948	-0.0920421	2.25057	9.47759	10.0091	2.21052	6.40821	3.65023	8.98919	3.91376	6.02389	9.43577
chrI:3309893-3309955	CELE1	NA	NA	NA	NA	NA	NA	NA	NA	-0.191856	0.193237	0.94672	-0.414136	-0.264086	-0.115548	-0.680133	-0.0737452	11.1436	36.9896	80.181	0	8.01267	17.9035	0	19.1961	28.8744	30.1842
chrI:3316098-3316410	CELE1	NA	NA	NA	NA	NA	NA	NA	NA	-0.403488	-0.526915	0.380101	-0.100106	-0.0963709	-1.00587	0.114761	-1.1891	8.95069	7.06489	20.0363	14.3687	14.1406	3.01553	15.2606	2.00374	17.8407	21.7691
chrI:3317226-3317573	CELE1	NA	NA	NA	NA	NA	NA	NA	NA	0.567987	-0.264268	-0.490975	-0.00590194	0.240575	-0.513565	-0.964204	-0.481036	8.03145	0	5.13528	1.96279	4.12725	5.12617	1.99545	5.27737	13.3112	2.73219
chrI:3336844-3337217	CELE1	NA	NA	NA	NA	NA	NA	NA	NA	-0.274477	0.240113	0.613116	0.225281	-0.0998	-0.1133	0.502404	-0.0471911	0	3.99478	6.2946	3.83053	1.2453	1.26185	5.41986	1.67693	2.43194	2.54226
chrI:3350879-3351254	CELE1	NA	NA	NA	NA	NA	NA	NA	NA	0.421685	0	-0.674527	0	0.323771	-0.686791	-0.0145265	0.137494	3.69907	0	0	0	2.58122	0	3.61894	4.64505	4.95048	0
chrI:3374303-3374513	CELE1	NA	NA	NA	NA	NA	NA	NA	NA	-0.0045237	-0.24861	-0.0317904	0.209668	-0.279528	-0.0438073	0.509827	0.226751	3.29586	0	3.09415	6.78966	0	3.10895	9.60677	5.73152	4.31063	4.50618
chrI:3397199-3397244	CELE1	NA	NA	NA	NA	NA	NA	NA	NA	0.185563	0.0152874	-0.316482	-0.245288	-0.163614	-0.0878592	-0.266054	-0.62379	45.4978	32.4793	12.3284	14.8489	21.0987	24.52	15.096	0	39.5454	42.0267
chrI:3408585-3408901	CELE1	NA	NA	NA	NA	NA	NA	NA	NA	-0.20633	0.00698802	0.755178	-0.193163	0.0116809	0.554891	0.331489	0.296796	2.19377	4.52533	5.908	2.36456	4.53086	4.13873	2.19058	1.97846	0	5.99876
chrI:3417021-3417344	CELE1	NA	NA	NA	NA	NA	NA	NA	NA	0.357615	0.536904	0.960872	0.791159	0.176151	0.763519	0.864191	0.555056	6.43913	9.03882	7.26599	13.6756	4.31242	5.50589	6.42977	3.5937	0	3.03218
chrI:3429716-3429779	CELE1	NA	NA	NA	NA	NA	NA	NA	NA	0	0.326125	0	0	0	0	0	0	0	11.2073	0	0	0	0	0	0	0	0
chrI:3429856-3429953	CELE1	NA	NA	NA	NA	NA	NA	NA	NA	0.200147	0	-0.051641	0	0.275566	-0.33804	-0.0163071	-0.332625	7.09618	0	5.78679	0	9.50493	0	6.79905	0	9.71262	0
chrI:3431166-3431445	CELE1	NA	NA	NA	NA	NA	NA	NA	NA	0.349029	0.396094	0.6272	0.372346	-0.180105	1.26235	0	1.04249	9.98195	10.8843	4.66333	10.4705	3.46621	11.4275	0	8.79891	0	6.79145
chrI:3431771-3431828	CELE1	NA	NA	NA	NA	NA	NA	NA	NA	0	0.233093	0.223569	0.214029	0.15278	-0.089895	-0.0018224	-0.0458931	0	13.3928	22.5126	11.7767	8.03003	8.13675	11.9727	10.0376	15.6818	0
chrI:3434386-3434676	CELE1	NA	NA	NA	NA	NA	NA	NA	NA	-0.763578	-0.13657	1.23467	-1.03249	-0.243183	1.42165	1.30323	2.0505	2.38978	10.0638	10.9229	0	8.27087	13.2498	11.6418	25.2443	0	16.5542
chrI:3448325-3448647	CELE1	NA	NA	NA	NA	NA	NA	NA	NA	-0.715076	-0.213627	0.123343	-0.90717	-0.132226	0.199294	0.189958	0.282296	6.50006	13.6923	7.81951	4.22942	14.9029	8.44511	8.42552	9.42995	8.57871	23.843
chrI:3484660-3485061	CELE1	NA	NA	NA	NA	NA	NA	NA	NA	0	0.50068	0.561325	0.259155	0.781697	0.573149	0	0.930451	0	3.71653	3.03475	1.69913	6.18143	3.26363	0	5.79283	0	0
chrI:3507498-3507813	CELE1	NA	NA	1	NA	NA	0.999728	NA	NA	0.50721	0.452669	0.464499	0.289596	0.696059	-0.310139	-0.135352	0.114546	17.6476	16.6422	33.9318	13.6008	21.4993	16.9358	19.5997	24.8047	29.4522	12.1356
chrI:3537170-3537241	CELE1	0.98709	0.992938	1	0.845419	0.215589	0.999728	0.945372	0.570337	0.114684	-0.0347825	0.773331	-0.349438	-0.901001	-0.0813188	0.240394	0.724479	523.684	467.303	628.85	363.022	235.624	332.975	421.126	608.425	464.758	643.531
chrI:3540177-3540571	CELE1	NA	NA	NA	NA	NA	NA	NA	NA	-0.920294	0.149089	1.13546	-0.91472	-0.163615	0.169845	0.282201	0.829436	1.76057	13.1631	10.9184	1.72924	8.64916	2.85549	3.3737	7.59717	2.30264	14.6827
chrI:3560310-3560625	CELE1	NA	NA	1	NA	NA	NA	NA	NA	-0.288854	-0.254416	0.424687	-0.596535	0.242646	-0.416164	0.402773	-0.320451	8.80286	9.26765	17.5087	4.74409	18.5516	6.55627	17.0464	7.51174	14.6592	18.5536
chrI:3562214-3562499	CELE1	NA	NA	NA	NA	NA	NA	NA	NA	-0.565774	-0.128879	-0.0948108	-0.816868	-0.193101	0.660349	-0.0272603	0.3379	2.45471	8.14806	4.26563	0	6.92356	12.1943	4.75777	8.457	6.6562	13.5191
chrI:3563061-3563110	CELE1	NA	NA	NA	NA	NA	NA	NA	NA	0	0	-0.338517	0	0.396367	-0.341689	-0.334306	-0.0306394	0	0	0	0	20.1919	0	0	12.5434	19.0367	0
chrI:3610641-3611313	CELE1	0.98709	NA	NA	NA	NA	NA	NA	NA	-0.646591	-0.469797	0.525482	-0.103504	-0.475763	0.462585	0.220814	0.675939	5.18629	6.65994	4.59555	10.4459	6.75065	4.32664	3.05369	5.45772	2.82864	15.8695
chrI:3614472-3614618	CELE1	NA	NA	NA	NA	NA	NA	NA	NA	0.886033	0.0241407	0.566054	-0.0100664	-0.232632	-0.0376305	0.178781	-0.334552	47.6232	15.4478	29.3386	14.3923	10.0363	12.8417	18.322	8.22688	18.8498	19.8344
chrI:3619891-3620220	CELE1	NA	NA	NA	NA	NA	NA	NA	NA	-0.00349439	-0.216067	-0.36404	-0.217766	-0.0656952	-0.372972	-0.00903534	-0.0445205	2.10735	0	0	0	1.41134	0	2.01911	1.76418	2.75619	2.88122
chrI:3678410-3678593	CELE1	NA	NA	NA	NA	NA	NA	NA	NA	-0.611497	-0.606183	0.287806	-0.609579	-0.15514	0	0	0	0	0	3.54818	0	7.59361	0	0	0	0	15.6741
chrI:3681453-3681741	CELE1	0.98709	NA	1	NA	NA	NA	NA	NA	-0.349367	-0.180332	1.11951	-0.108965	-0.374071	0.0926065	0.125422	0.711494	16.913	20.4729	36.3266	22.1921	16.5211	13.9784	13.9306	25.1076	16.0287	33.5563
chrI:3686094-3686473	CELE1	NA	NA	NA	NA	NA	NA	NA	NA	0.157653	0.72969	-0.424678	-0.439566	-0.076637	0.566548	0.910397	0.66713	7.37254	15.7268	0	1.7975	5.00532	5.45206	8.91513	6.48341	2.39354	7.58956
chrI:3706831-3707158	CELE1	NA	NA	NA	NA	NA	NA	NA	NA	-0.00772355	1.01198	0.627526	-0.00601736	-0.113484	0.120623	0.272106	0.428877	2.1202	15.8518	7.70031	2.08247	1.53902	2.87763	4.23424	5.59916	2.773	2.89879
chrI:3722110-3722436	CELE1	NA	NA	1	NA	NA	NA	NA	NA	0.641989	0.395917	1.14059	0.190537	0.584501	1.26186	1.4821	0.644318	12.8411	9.1379	13.1889	6.46993	11.6332	14.6775	18.5966	7.39664	2.91082	5.91201
chrI:3748941-3749124	CELE1	0.98709	NA	1	NA	NA	0.999728	0.740115	NA	-0.279026	-0.506341	1.16452	-0.0143517	-0.185386	0.0792997	0.682899	0.352064	60.6877	49.0424	119.345	76.7752	66.2518	48.6039	81.653	62.0726	60.6972	104.723
chrI:3794069-3794390	CELE1	NA	NA	NA	NA	NA	NA	NA	NA	0.24547	0.264863	-0.0254537	0.256561	0.33914	-0.0336818	-0.00207259	0.376342	2.18027	2.41237	2.02753	2.32785	3.0141	2.03723	2.15657	5.42403	2.82467	0
chrI:3834779-3835082	CELE1	NA	NA	NA	NA	NA	NA	NA	NA	-0.216819	-0.19708	1.16554	-0.466859	-0.300469	0	0.3598	0.328017	2.30936	2.5552	10.4558	0	1.53204	0	2.28426	2.06306	0	6.3593
chrI:3855055-3855350	CELE1	0.98709	NA	NA	NA	NA	NA	NA	NA	-0.342111	-0.87829	-0.348153	0.0925736	-0.187254	0.631558	-0.024784	0.0890963	16.4906	7.67172	4.12152	26.7319	19.6731	15.2422	6.84807	8.01929	9.36123	32.4422
chrI:3858830-3859089	CELE1	NA	NA	NA	NA	NA	NA	NA	NA	0.865259	0.191332	-0.707864	-0.192725	0.473008	0.0881504	-0.0140326	0.392646	26.8745	11.2638	4.6922	5.51007	16.5725	14.8296	13.246	20.6715	17.6539	10.9708
chrI:3870174-3870250	CELE1	NA	NA	NA	NA	NA	NA	NA	NA	0	0	-0.444306	0	0.271038	-0.450092	-0.434691	-0.444906	0	0	0	0	6.55582	0	0	0	12.3615	0
chrI:3870289-3870582	CELE1	NA	NA	NA	NA	NA	NA	NA	NA	0	0.218292	-0.836745	0.209713	0.409589	-0.844164	-0.82704	-0.259016	0	2.43968	0	2.3233	4.75247	0	0	4.26647	9.42491	0
chrI:4207631-4207994	CELE1	NA	NA	NA	NA	NA	NA	NA	NA	0.116484	0.0298289	0.462824	-0.750283	-0.275412	0.417732	0.732835	0.224017	11.5176	10.3431	5.14516	2.05925	6.50485	4.90085	7.47649	3.446	2.49875	13.2342
chrI:4277537-4277794	CELE1	NA	NA	NA	NA	NA	NA	NA	NA	0	0	0	0.248162	0.183828	0.28751	0.745437	0.285157	0	0	0	2.9053	1.95658	2.54259	7.74775	2.4309	0	0
chrI:4376972-4377193	CELE1	NA	NA	NA	NA	NA	NA	NA	NA	-0.167891	0.161821	1.05252	-0.327415	-0.534064	0.564159	0.668499	1.21607	12.5898	20.1898	10.9907	9.53004	6.8216	5.08072	6.00276	13.5175	0	21.6994
chrI:4443037-4443338	CELE1	NA	NA	NA	NA	NA	NA	NA	NA	-0.26041	0.14358	0.742194	-1.15048	-1.14179	-0.129946	0.6847	-0.410136	13.8822	22.3608	9.38916	2.48201	3.21371	1.56269	8.91833	0	3.15178	25.3963
chrI:4734183-4734536	CELE1	NA	NA	1	NA	NA	NA	NA	NA	-0.266769	-0.357389	-0.429376	-0.390321	-0.147501	-0.3238	0.104211	-1.72303	11.8243	10.4671	8.73674	10.0234	13.5979	10.0786	15.5342	0	18.4632	21.8444
chrI:4792774-4792906	CELE1	NA	NA	NA	NA	NA	NA	NA	NA	0	0.326125	-0.444306	0	0	-0.450092	-0.434691	-0.444906	0	5.39297	0	0	0	0	0	0	7.15667	0
chrI:4833055-4833435	CELE1	0.98709	NA	1	NA	NA	0.999728	NA	NA	-0.500438	-0.357599	0.875364	-0.132263	-0.142374	0.130378	-0.56111	0.439963	23.8675	27.2935	50.4192	33.6668	33.4231	26.9163	14.2858	35.2699	32.0334	51.0729
chrI:4895648-4895791	CELE1	NA	NA	NA	NA	NA	NA	NA	NA	0	0.326125	0	0	0	0	0.422173	0	0	4.98101	0	0	0	0	4.62713	0	0	0
chrI:4919030-4919372	CELE1	NA	NA	NA	NA	NA	NA	NA	NA	-0.669484	-0.269657	-0.139366	-0.124593	-0.67853	0.464547	-0.952679	0.394595	4.07426	8.53812	8.51687	10.7327	4.30128	16.9786	2.02453	15.5382	13.5053	16.8165
chrI:4937432-4937546	CELE1	NA	NA	NA	NA	NA	NA	NA	NA	-0.225598	-0.221248	0.598353	0.333624	-0.0747448	0.241329	1.22767	0.982497	0	0	11.3542	17.8187	4.04993	4.10375	29.7031	21.0322	0	8.26786
chrI:5080470-5080769	CELE1	0.98709	NA	1	NA	NA	0.999728	NA	NA	-0.123243	0.294025	0.611532	-0.327626	-0.122095	-0.142435	0.276702	0.313442	20.9731	32.0734	36.3133	16.603	21.0935	18.7987	27.2144	28.0682	27.8502	32.0097
chrI:5186295-5186669	CELE1	NA	NA	NA	NA	NA	NA	NA	NA	-0.00727502	0.593913	-0.0403675	0.218242	0.080744	0.123325	-0.612471	0.311746	1.85447	8.12696	3.48195	3.82031	2.69226	4.75709	0	6.3299	4.8509	2.53548
chrI:5621323-5621466	CELE1	NA	NA	NA	NA	NA	NA	NA	NA	-0.0096333	0.0111281	-0.0417953	0.161315	-0.0540257	0.332228	0.278431	0.218693	14.58	14.943	4.53379	19.8975	13.4797	9.8319	9.44946	8.39827	6.31628	19.8084
chrI:5621797-5622005	CELE1	NA	NA	NA	NA	NA	NA	NA	NA	-0.0243091	-0.127285	0.126546	-0.302392	-0.379346	0.0462386	-1.0017	-1.04786	16.7003	14.2971	12.0847	10.7593	9.47434	10.7935	0	0	13.4604	23.3517
chrI:5746184-5746348	CELE1	NA	NA	NA	NA	NA	NA	NA	NA	NA	NA	0	NA	NA	0	0	0	0	0	0	0	0	0	0	0	0	0
chrI:5918722-5918883	CELE1	NA	NA	NA	NA	NA	NA	NA	NA	0	0	NA	0	0.261956	NA	NA	NA	0	0	0	0	2.87495	0	0	0	0	0
chrI:6321226-6321376	CELE1	NA	NA	NA	NA	NA	NA	NA	NA	NA	NA	0.250407	NA	NA	0	0.289384	0.254563	0	0	3.75566	0	0	0	4.59878	3.85549	0	0
chrI:6805193-6805356	CELE1	0.98709	NA	1	NA	NA	0.999728	NA	NA	0.0755851	-0.379307	-0.0122124	0.0962151	0.435778	-0.122478	-0.13273	-0.0529735	34.0443	18.2201	42.7439	34.9419	50.4215	38.3877	37.4226	40.4203	55.9758	41.9328
chrI:6971463-6971616	CELE1	NA	NA	NA	NA	NA	NA	NA	NA	-0.00466668	-0.194465	0	-0.440776	-0.120439	0	0	0.287823	9.11749	4.65756	0	0	6.30221	0	0	3.78039	0	12.3481
chrI:7239395-7239733	CELE1	0.98709	NA	1	NA	NA	NA	NA	NA	-0.196682	-0.148211	-0.442802	-0.888557	0.0265226	-1.43992	-0.615322	-1.98371	20.6898	21.685	27.7779	8.45202	25.997	10.2878	24.1665	5.41747	54.6585	34.2164
chrI:7527497-7527851	CELE1	NA	NA	NA	NA	NA	NA	NA	NA	-0.407586	-0.389009	0.492861	0.00734439	0.542151	0.0618904	0.410011	-0.0945094	1.95895	2.02046	8.47055	6.147	13.4495	4.50662	7.66604	3.40662	5.36246	8.03496
chrI:7588537-7588678	CELE1	NA	NA	NA	NA	NA	NA	NA	NA	0	0.228678	0	0.233633	0	0	0	0	0	5.05116	0	5.27864	0	0	0	0	0	0
chrI:7729926-7730201	CELE1	NA	NA	NA	NA	NA	NA	NA	NA	-0.251879	0.396996	0.197271	-0.00562266	0.0912284	0.223761	0.276605	1.18389	0	8.012	4.10946	2.47482	3.65796	4.75354	4.93015	17.5268	3.29545	3.44494
chrI:7970104-7970434	CELE1	NA	NA	1	NA	NA	NA	NA	NA	-0.126406	-0.0689962	-0.130086	-0.81295	-0.160367	-0.456818	-0.427005	-0.699763	16.8679	18.0549	16.9744	6.39175	16.1858	12.2047	12.4177	9.06611	25.4974	26.0437
chrI:8086600-8086923	CELE1	0.98709	NA	1	NA	NA	NA	NA	NA	-0.323867	0.120017	-0.830362	-0.842548	-0.362707	0.648544	-1.29865	-0.0179161	17.2527	27.4838	5.78036	8.84332	16.656	27.8499	2.14326	14.7914	20.0422	32.6708
chrI:8213293-8213430	CELE1	NA	NA	NA	NA	NA	NA	NA	NA	-0.513217	-0.714085	0.194243	-0.729944	-0.0105132	-0.399328	-0.0261722	-0.125553	10.0786	5.19757	25.2782	4.94965	24.7567	11.5931	19.7206	17.2008	26.9765	34.9077
chrI:8769487-8769663	CELE1	NA	NA	1	NA	NA	NA	NA	NA	-0.65711	-0.602415	0.245622	-0.228034	-0.0983899	-0.429153	-0.18736	0.241	15.7907	17.2181	30.7739	28.1407	32.2377	13.3314	18.981	30.6191	31.3099	49.2392
chrI:9241172-9241459	CELE1	NA	NA	NA	NA	NA	NA	NA	NA	0.331831	0.636632	0.912412	0.00768885	0.573803	-0.138879	0.850099	0.602865	9.68168	15.1497	12.4102	5.20532	13.751	1.63865	11.5678	8.24205	3.30499	6.7126
chrI:9903551-9903834	CELE1	NA	NA	NA	NA	NA	NA	NA	NA	-0.320836	0.659367	-0.0990068	0.239229	0.00384824	0.811245	1.26141	0.331725	9.81804	31.3548	4.29567	20.1777	15.447	14.59	24.0553	8.35814	6.70308	20.4214
chrI:9970620-9970863	CELE1	NA	NA	NA	NA	NA	NA	NA	NA	-0.214946	-0.452579	0.298143	-0.203692	-0.12653	0.258572	0.607621	0	2.87724	0	2.3242	3.07199	3.97762	1.93414	5.57673	0	0	8.05266
chrI:10128125-10128406	CELE1	NA	NA	NA	NA	NA	NA	NA	NA	-0.314977	-0.286888	0.235467	-0.714365	-0.357156	-1.25798	-0.797184	0.0700718	7.46858	7.84153	12.9784	2.42217	6.88326	0	2.36279	10.6414	13.0513	16.9704
chrI:10487316-10487446	CELE1	NA	NA	1	NA	NA	0.00509235	0.000300636	NA	0.857831	0.44786	1.16389	0.581526	0.35125	2.71642	3.12474	-1.00335	31.9526	17.3346	57.1859	21.3643	14.5193	196.014	270.067	0	21.4749	7.49943
chrI:10635414-10635517	CELE1	0.98709	NA	1	NA	NA	0.999728	NA	NA	-0.183598	-0.698095	0.269442	-0.42454	0.0341833	-0.134853	-0.991373	-0.151276	87.4375	50.5666	94.6685	68.2363	106.756	66.8421	26.1677	65.0376	98.2351	140.48
chrI:10929536-10929887	CELE1	NA	NA	NA	NA	NA	NA	NA	NA	-0.150843	-0.570648	-0.367261	-0.800434	-0.82479	0.124729	-0.0241705	-0.364399	11.8915	6.45122	1.61109	4.06994	4.1913	5.06792	3.78583	1.65392	5.28801	19.3572
chrI:11067846-11068191	CELE1	NA	NA	NA	NA	NA	NA	NA	NA	0	0.286451	0.650227	0.285599	1.52459	1.27472	1.3709	1.13754	0	2.07302	6.80399	2.16638	18.5149	13.8715	15.6496	12.1683	2.75097	0
chrI:11083044-11083326	CELE1	NA	NA	NA	NA	NA	NA	NA	NA	0.204761	0.229459	0.298863	0.0023239	0.480843	0	0.342029	0.958666	4.96146	5.27932	2.0039	2.64864	8.50467	0	2.35444	8.54665	0	3.47147
chrI:11169087-11169130	CELE1	NA	NA	NA	NA	NA	NA	NA	NA	NA	NA	NA	NA	NA	NA	NA	NA	0	0	0	0	0	0	0	0	0	0
chrI:11448532-11448691	CELE1	NA	NA	NA	NA	NA	NA	NA	NA	-0.206722	-0.204707	0.255584	-0.205993	0.0671299	0.4103	0	0	0	0	3.54441	0	5.82177	5.89914	0	0	0	6.14016
chrI:11930469-11930610	CELE1	NA	NA	NA	NA	NA	NA	NA	NA	-0.0154205	-0.207171	-0.41093	0.174239	-0.339416	0.693062	0.511876	-0.0641337	9.84136	5.4703	0	14.8991	3.27987	17.9135	14.4728	4.09986	6.70308	13.837
chrI:12009966-12010291	CELE1	NA	NA	NA	NA	NA	NA	NA	NA	0.619127	0.466947	0	0.253622	0.162073	0	0.295825	0.260167	6.46055	4.58297	0	2.29928	1.54846	0	2.13011	1.78583	0	0
chrI:12261214-12261580	CELE1	NA	NA	NA	NA	NA	NA	NA	NA	0	0	0	0	0.261956	0	0.321711	0.306692	0	0	0	0	1.26905	0	1.81555	1.70891	0	0
chrI:12270553-12270922	CELE1	NA	NA	NA	NA	NA	NA	NA	NA	NA	NA	NA	NA	NA	NA	NA	NA	0	0	0	0	0	0	0	0	0	0
chrI:12852453-12852630	CELE1	NA	NA	NA	NA	NA	NA	NA	NA	0.582039	0.617794	0.223651	-0.0105398	-0.360469	0.884585	-0.375452	-0.0608263	15.7019	16.787	6.85377	3.83737	0	19.0099	0	3.27067	5.1098	5.51924
chrI:12863804-12864106	CELE1	NA	NA	NA	NA	NA	NA	NA	NA	-0.206623	-0.444157	-0.343379	-0.208388	-0.117896	-0.0347649	-0.0170136	-0.0505862	2.31699	0	0	2.25429	3.2031	2.16498	2.19903	1.92139	3.14138	6.27593
chrI:12882660-12882728	CELE1	NA	NA	NA	NA	NA	NA	NA	NA	0.59991	0.190369	-0.311184	0.468009	0.509246	-0.58287	-0.980209	-0.750496	50.873	20.7903	34.1186	39.5972	42.7634	23.1863	10.064	17.5268	67.7478	14.238
chrI:12882800-12883118	CELE1	0.98709	NA	1	NA	NA	NA	NA	NA	0.89512	1.10277	-1.2111	-0.374507	0.392423	-0.338247	-0.029916	0.16742	26.2432	32.225	3.55552	4.49096	15.2122	12.6638	17.0623	20.4983	23.2076	12.0214
chrI:12924194-12924545	CELE1	NA	NA	NA	NA	NA	NA	NA	NA	-0.756775	-1.08537	0.282385	-0.455516	-0.517986	0.626335	-0.280182	0.704925	7.92138	4.24445	8.78639	12.0208	11.1398	12.8173	3.86569	13.8704	7.9921	27.6403
chrI:12974377-12974720	CELE1	0.98709	NA	1	NA	NA	NA	NA	NA	-0.554333	0.0293295	-0.26656	-1.2229	-1.00438	0.168668	0.300212	0.0721181	22.3144	38.7424	12.5371	10.3148	14.1067	19.138	21.7149	17.447	21.521	50.7625
chrI:13336338-13336688	CELE1	NA	NA	NA	NA	NA	NA	NA	NA	0.411205	0.564018	0.839075	0.640495	0.456749	0.523085	0.387192	-0.105827	11.9065	14.474	13.4141	15.9471	12.721	9.11596	7.67332	3.31726	5.42357	8.21662
chrI:13530831-13531184	CELE1	NA	NA	NA	NA	NA	NA	NA	NA	0.0633237	-0.233376	0.43364	-0.14454	-0.239383	0.580996	-0.0208043	-0.0683216	7.93273	0	5.04824	2.11742	0	6.37243	1.88222	1.64458	2.68881	8.05766
chrI:14162996-14163246	CELE1	NA	NA	NA	NA	NA	NA	NA	NA	-0.217942	-0.208302	0.166856	-0.466454	-0.299886	-0.334298	-0.319177	-0.0348055	2.77062	2.85763	4.51876	0	1.85554	0	0	2.49869	3.79218	7.70211
chrI:14350513-14350650	CELE1	NA	NA	NA	NA	NA	NA	NA	NA	-0.145901	-0.381731	-0.671437	-0.417471	-0.668491	-0.222155	-0.181963	-0.894465	30.3319	22.0841	12.3284	20.7626	14.3488	23.1863	24.7526	8.43739	40.4648	48.9166
chrI:14403693-14403849	CELE1	NA	NA	NA	NA	NA	NA	NA	NA	0.447706	0.458679	0	0.242475	0	0.758797	0.647254	0	8.9011	9.13713	0	4.35064	0	10.1901	8.66702	0	0	0
chrI:14479546-14479635	CELE1	NA	NA	NA	NA	NA	NA	NA	NA	-0.0131745	-0.992203	0.46072	-0.138195	-0.51502	0.193857	-0.00477603	0.312336	38.929	0	32.4587	32.575	16.3927	20.9747	15.4314	26.3746	20.2121	53.1738
chrI:14501597-14501645	CELE1	NA	NA	NA	NA	NA	NA	NA	NA	-0.162292	-1.00305	-0.444682	-0.500356	-0.676068	-1.00279	-0.893975	-0.949929	57.1748	0	38.2212	30.5945	19.8069	9.63125	14.1717	11.8812	97.1262	98.3114
chrI:14600301-14600349	CELE1	NA	NA	NA	NA	NA	NA	NA	NA	-0.221884	-0.00110946	-0.302868	-0.220671	0.0855855	-0.589638	-0.573738	-0.285551	0	14.6381	11.5736	0	20.604	0	0	12.7994	38.8505	20.0495
chrI:14661979-14662074	CELE1	NA	NA	NA	NA	NA	NA	NA	NA	-0.417912	-0.376893	1.05052	-0.404203	-0.405754	0.630558	1.28049	-0.0789507	29.252	31.126	43.1381	29.8462	29.9225	27.3329	56.4039	6.53304	9.91497	70.3176
chrI:14734604-14734786	CELE1	NA	NA	NA	NA	NA	NA	NA	NA	-0.81335	-0.806733	-0.400894	-0.351188	-0.848642	0.3793	-0.384631	0.220082	0	0	0	7.46504	0	8.74236	0	6.60848	5.2013	21.1282
chrI:15018227-15018410	CELE1	NA	NA	NA	NA	NA	NA	NA	NA	-0.41654	0.0039562	-0.938347	0.312701	-0.0580055	-0.308456	-0.259126	0.271162	3.81547	11.6945	0	20.0072	10.5493	7.13031	7.24246	16.5537	15.0594	15.8459
chrI:15035509-15035867	CELE1	NA	NA	NA	NA	NA	NA	NA	NA	0.352347	0.223494	0.566589	0.357932	0.780278	-1.25458	-0.027129	0.208273	7.80381	6.32543	14.6949	7.79588	13.6261	0	7.65892	10.106	10.4876	5.38504
chrI:15042277-15042449	CELE1	NA	NA	NA	NA	NA	NA	NA	NA	0.117321	-0.308892	-0.390297	0.127617	-0.406899	-0.52337	-0.148073	-1.04989	24.2336	12.7821	14.1037	24.4586	11.4459	10.9117	19.9073	3.3652	31.5449	27.8454
chrI:10339-10432	CELE1	NA	NA	NA	NA	NA	NA	NA	NA	-0.229219	-0.217371	0.23263	-0.48943	0.0190889	-0.116581	-0.0129892	0.646593	7.39815	7.63048	12.9784	0	15.2796	5.02054	7.08837	25.2522	9.676	20.5663
chrI:10442-10603	CELE1	NA	NA	NA	NA	NA	NA	NA	NA	0.487484	0.213024	-0.643371	-0.505508	0.271814	-0.691266	-0.573226	-0.908017	21.5455	14.0175	11.5607	0	15.098	11.0118	12.686	7.1874	34.47	12.1287
chrI:30745-31105	CELE1	NA	NA	1	NA	NA	NA	NA	NA	0.355694	0.561211	0.803515	0.379875	1.38797	-0.25254	-0.385233	0.00149434	7.76057	10.429	24.9893	8.12119	25.7028	8.86344	7.53862	11.7873	15.4685	5.3552
chrI:70485-70802	CELE1	NA	NA	1	NA	NA	NA	NA	NA	-0.177651	0.282806	0.467314	0.248738	-0.045023	-0.734595	0.352379	0.341831	8.78914	16.3503	21.5047	15.6632	10.8663	5.60978	19.1229	18.8735	17.6932	15.3475
chrI:70898-71171	CELE1	NA	NA	NA	NA	NA	NA	NA	NA	-0.0165086	0.490382	0.121358	0.324103	-0.226053	-0.988068	-0.211914	0.378802	7.63832	16.141	14.8011	12.9499	5.38445	2.39412	9.82969	20.1079	17.3693	10.5257
chrI:100693-100823	CELE1	NA	NA	1	NA	NA	NA	NA	NA	0.288662	0.580557	0.339501	0.166179	0.615781	0.976442	0.825447	1.14087	26.6946	39.2358	32.2673	22.3798	40.3007	60.2705	52.3651	69.4094	28.7409	22.4983
chrI:115082-115412	CELE1	NA	NA	NA	NA	NA	NA	NA	NA	-0.309443	-0.646299	1.44602	-0.906813	-0.396005	0.602261	0.93174	0.451689	8.42394	4.51374	17.6513	2.0636	7.27137	6.81523	10.3198	5.41248	2.74787	17.5217
chrI:192308-192573	CELE1	NA	NA	NA	NA	NA	NA	NA	NA	-1.01037	-0.992657	0.710848	-1.0079	-0.760572	0.0667208	0.770968	0.148235	2.61438	2.69648	14.4039	2.56786	5.54639	6.01448	15.2408	6.90422	6.99767	25.3778
chrI:203734-204076	CELE1	NA	NA	NA	NA	NA	NA	NA	NA	0.413887	0.452729	-0.267332	0.230495	0.387789	-0.342415	-1.06504	-0.622697	6.10174	6.62049	8.7669	4.17673	5.77299	7.95269	2.02453	5.35429	16.157	2.77202
chrI:205636-205778	CELE1	NA	NA	NA	NA	NA	NA	NA	NA	0.425917	0.449111	-0.0642406	0.243535	0.440578	-0.0509275	-0.298932	-0.327382	9.72623	10.4479	8.53127	5.24172	9.7708	9.17467	4.65949	4.38582	13.0166	0
chrI:205935-206089	CELE1	NA	NA	NA	NA	NA	NA	NA	NA	-0.429905	0.0151089	0.230187	-0.416462	-0.182077	0.185491	-0.0143852	1.13214	4.52933	14.2665	7.87078	4.83591	9.51831	7.2769	4.4801	27.7433	6.14088	18.6067
chrI:247804-248082	CELE1	NA	NA	NA	NA	NA	NA	NA	NA	-0.220843	0.0140039	0	-0.219839	-0.0665699	0.245076	0.565977	0	0	2.78417	0	0	1.66932	1.69151	4.87714	0	0	3.4079
chrI:250418-250696	CELE1	NA	NA	1	NA	NA	0.003757	0.00441878	NA	-0.942796	-0.748445	0.181981	-1.30401	-0.814341	2.75279	2.63758	0.918826	10.0177	13.0675	12.5032	5.13483	12.1052	116.579	106.793	26.4913	13.1916	41.6881
chrI:289931-290268	CELE1	NA	NA	NA	NA	NA	NA	NA	NA	0.177732	-0.489345	-1.15596	0.00888677	0.273787	-0.558511	-0.463245	-0.277299	6.2116	0	0	4.4353	7.12077	3.33704	4.0258	5.56661	11.1392	5.71961
chrI:318262-318518	CELE1	0.98709	0.97982	1	0.796229	0.301476	0.999728	0.972953	0.294035	0.12975	0.120754	-0.0153607	0.294509	0.543656	0.296459	-0.100489	0.708068	280	277.886	269.91	315.411	378.858	337.092	253.268	453.297	359.832	341.341
chrI:333414-333697	CELE1	NA	NA	1	NA	NA	NA	NA	NA	-0.773887	-0.740097	0.0835351	-0.0095621	0.166644	0.581202	0.657325	0.985402	2.44868	2.73515	8.28937	12.494	15.3095	15.2381	16.72	23.3413	9.60786	17.0735
chrI:342236-342400	CELE1	NA	NA	NA	NA	NA	NA	NA	NA	-0.346231	0.146382	0.447064	-0.336693	-0.0944513	0.420498	0.532622	0.645119	8.50966	21.7353	10.8308	8.68253	14.5868	10.8116	12.4554	14.3861	5.76871	23.2414
chrI:344476-344785	CELE1	NA	NA	1	NA	NA	NA	NA	NA	1.18051	0.690448	0.704159	0	0.944211	-0.457463	0.373769	0.259379	15.7245	7.51725	15.7416	0	10.8947	3.04472	11.0189	9.53513	8.93847	0
chrI:359530-359672	CELE1	NA	NA	NA	NA	NA	NA	NA	NA	0.705638	0.236181	-0.0924007	0.00231909	-0.11404	-0.111499	-0.310989	-0.073782	24.5008	10.4479	7.93154	5.24172	3.53006	7.88755	4.65949	8.457	13.0166	6.87011
chrI:367478-367605	CELE1	NA	NA	NA	NA	NA	NA	NA	NA	-0.0178053	-0.821193	-0.280776	0.0149356	-0.217637	-0.341819	-0.250737	-0.559629	21.7838	0	10.201	23.4239	15.1647	8.81188	10.6306	4.89978	22.3087	30.2067
chrI:396163-396523	CELE1	NA	NA	NA	NA	NA	NA	NA	NA	0.116621	0.0242175	0.0886195	0.244848	0.197547	-0.716163	-0.278316	-0.101328	9.68696	8.44214	6.52128	11.5369	10.8621	1.30729	3.76931	5.08732	7.79285	10.8856
chrI:408996-409357	CELE1	NA	NA	NA	NA	NA	NA	NA	NA	-0.56807	-0.376315	-1.16648	-0.752684	-0.747889	-0.147079	-0.0124511	-0.524762	5.79978	8.08999	0	3.77376	4.18341	6.2316	7.5178	3.34075	10.0502	18.7351
chrI:471509-471904	CELE1	NA	NA	NA	NA	NA	NA	NA	NA	-0.00785745	-0.253431	0.45857	0.205151	-0.284591	0.273086	0	0	1.77285	0	2.86417	3.61772	0	1.65654	0	0	0	2.48087
chrI:554456-554850	CELE1	0.98709	NA	1	NA	NA	0.999728	NA	NA	-0.120193	0.197888	0.707095	-0.845005	-0.0237246	0.829847	0.331504	0.644311	17.6728	24.3596	24.274	7.08537	19.3599	27.3602	17.4378	23.1332	16.5468	26.8783
chrI:617037-617088	CELE1	NA	NA	NA	NA	NA	NA	NA	NA	0.234577	0.620745	-0.0491287	0.77473	0.301142	-0.347557	-0.340105	-0.344632	13.3736	41.3807	10.9059	56.3798	17.9131	0	0	0	18.3046	0
chrI:622623-622765	CELE1	NA	NA	NA	NA	NA	NA	NA	NA	-0.0140742	0.0156958	0.0529607	0.186976	0.00495787	-0.592824	-0.778951	-0.841306	9.72623	10.4479	20.4286	14.7949	10.3171	7.88755	4.65949	4.07119	25.7375	13.5191
chrI:652631-652777	CELE1	NA	NA	NA	NA	NA	NA	NA	NA	0.373288	0.229185	0.473392	-0.256256	-0.295849	-0.45761	0.734687	0.464435	14.2824	10.5685	12.7404	0	0	0	18.5132	12.4934	6.47508	6.68316
chrI:653218-653270	CELE1	NA	NA	NA	NA	NA	NA	NA	NA	0	0	NA	0	0.388135	NA	NA	NA	0	0	0	0	17.5752	0	0	0	0	0
chrI:659684-659977	CELE1	0.98709	0.97982	1	0.948017	0.97327	0.999728	0.970899	0.979235	-0.342751	0.128317	-0.302565	0.120004	-0.0325783	-0.190727	0.115225	0.111829	159.247	226.241	141.264	223.986	200.573	153.266	192.409	192.117	233.536	275.96
chrI:663982-664095	CELE1	NA	NA	NA	NA	NA	NA	NA	NA	NA	NA	0.64992	NA	NA	0	0	0.261329	0	0	14.9238	0	0	0	0	5.10684	0	0
chrI:681818-682130	CELE1	NA	NA	NA	NA	NA	NA	NA	NA	0.197898	0.0052001	-0.720388	-0.24486	0.222796	-0.412525	-0.310304	-0.721661	4.48592	2.29158	0	0	4.58876	1.50777	2.21858	0	5.9469	3.03771
chrI:743608-743984	CELE1	NA	NA	NA	NA	NA	NA	NA	NA	-0.172521	0.0109289	0.259274	0.00361498	0.142925	0.732689	-0.278619	-0.121476	7.41365	9.67067	7.97625	9.76476	11.5329	13.7073	3.60934	4.75207	7.5743	12.9456
chrI:947731-947886	CELE1	NA	NA	NA	NA	NA	NA	NA	NA	-0.251219	0.221187	-0.335052	0.196168	-0.282245	-0.338255	-0.33081	-0.335333	0	9.57722	0	8.75707	0	0	0	0	5.83041	6.09489
chrI:947937-948055	CELE1	NA	NA	NA	NA	NA	NA	NA	NA	0	0.334987	NA	0	0	NA	NA	NA	0	6.52758	0	0	0	0	0	0	0	0
chrI:1025115-1025167	CELE1	NA	NA	NA	NA	NA	NA	NA	NA	-0.213405	-0.454808	-0.507439	-0.45771	-0.288085	-0.510578	-0.503186	-0.507728	13.1212	0	0	0	8.78758	0	0	0	34.3224	36.476
chrI:1110846-1110959	CELE1	NA	NA	NA	NA	NA	NA	NA	NA	0	0.539732	0	0	0	0.267805	0.337538	0	0	18.8754	0	0	0	4.13975	5.84479	0	0	0
chrI:1140643-1140798	CELE1	NA	NA	NA	NA	NA	NA	NA	NA	0.272515	-0.154651	-0.101693	-0.169137	-0.76273	-0.177816	0.599633	0.140309	26.8745	14.1751	7.27058	13.9884	3.23589	6.0504	22.0767	11.4842	11.9319	24.5823
chrI:1168226-1168663	CELE1	NA	NA	1	NA	NA	NA	NA	NA	-0.151939	0.150103	0.177111	-1.04867	0.591155	0.239414	0.748838	0.167399	9.57173	13.6443	9.84653	1.55948	20.9168	10.7209	17.1188	9.71513	10.576	15.4121
chrI:1177151-1177422	CELE1	NA	NA	NA	NA	NA	NA	NA	NA	-0.171242	0.394424	0.110143	-0.173151	-0.457586	-0.619512	-0.267915	-0.986136	5.13777	15.822	8.97037	5.02244	1.85588	2.41172	5.00265	0	10.3427	10.4868
chrI:1235952-1236067	CELE1	NA	NA	NA	NA	NA	NA	NA	NA	0.162296	0.0164229	-0.106519	-0.442202	-0.296998	-0.429409	0.213181	0.491564	17.9851	12.8797	9.77767	0	4.01501	4.06837	17.7167	25.8697	16.411	16.3932
chrI:1239833-1240128	CELE1	NA	NA	NA	NA	NA	NA	NA	NA	-0.263292	0.410003	-0.817833	-0.26115	-0.0810019	-1.22741	-0.0234297	0.0638959	0	7.67172	2.20563	0	1.7054	0	9.19406	10.1381	12.5769	3.319
chrI:1241267-1241388	CELE1	NA	NA	NA	NA	NA	NA	NA	NA	0.217117	0.409578	0.996635	0	0.150308	0.174347	-0.0168623	1.13929	5.70021	11.7584	29.2963	0	3.81755	9.24525	5.46153	34.5101	7.45528	0
chrI:1242595-1242720	CELE1	NA	NA	NA	NA	NA	NA	NA	NA	-0.244336	0.222404	0.228567	0.20117	0.148916	-0.0551528	-0.0123159	-0.0505394	5.5718	18.0225	10.363	17.3189	15.4054	5.20626	5.51123	4.97755	7.55426	15.3431
chrI:1370310-1370604	CELE1	NA	NA	1	NA	NA	NA	NA	NA	0.215521	-0.287975	-0.253151	0.208262	0.0495609	-0.901529	-1.7031	-1.06786	16.5914	7.29422	20.3868	16.208	13.1599	10.4945	2.35395	8.04648	35.0621	16.4369
chrI:1380102-1380255	CELE1	NA	NA	NA	NA	NA	NA	NA	NA	0.18045	-0.220588	-0.742623	-0.0137654	0.921619	-0.535358	-0.447956	-0.290108	13.6332	4.65756	4.23939	8.8708	37.5596	7.32416	8.65333	11.6333	24.723	12.5534
chrI:1400482-1400671	CELE1	NA	NA	NA	NA	NA	NA	NA	NA	-0.19521	-0.364606	0.418566	0.148431	-0.578445	0.0133784	-0.288756	0.297973	11.0153	7.86341	14.9238	18.6752	5.10811	7.45155	3.50688	12.73	10.0193	20.3498
chrI:1440197-1440351	CELE1	NA	NA	NA	NA	NA	NA	NA	NA	-0.569985	-0.82526	0.764248	-0.828984	-0.862233	0.31603	0	0.314953	4.48662	0	11.5295	0	0	4.23219	0	4.04627	0	24.9449
chrI:1526266-1526474	CELE1	NA	NA	NA	NA	NA	NA	NA	NA	0.202517	0.413878	-0.0708178	-0.0104022	0.486164	-0.429675	-0.721841	0.540414	6.65479	10.5804	5.83718	3.26819	11.7028	2.25804	0	14.5736	8.90613	4.7006
chrI:1541888-1542226	CELE1	NA	NA	1	NA	NA	NA	NA	NA	0.9179	0.64493	1.38543	0.918734	0.824885	1.28916	1.13959	1.14516	10.3351	6.34748	18.2467	10.2707	8.81927	15.8563	14.0073	14.0042	2.80778	0
chrI:1545852-1546307	CELE1	0.98709	NA	1	NA	NA	0.999728	NA	NA	-0.820607	0.182082	0.259819	0.064302	0.160489	0.151486	0.476456	0.204913	9.1939	26.0808	23.138	23.344	25.3692	21.6303	28.1943	22.1974	24.5846	29.5381
chrI:1553955-1554308	CELE1	0.98709	NA	1	NA	NA	0.999728	0.950896	0.901439	-0.196363	-0.255403	0.0268138	-0.587532	-0.438668	0.216917	0.242978	0.443205	37.5309	35.4537	47.13	26.0233	30.2684	53.7123	55.4579	64.9087	60.6478	59.8041
chrI:1572494-1572604	CELE1	NA	NA	NA	NA	NA	NA	NA	NA	-0.992693	-0.291937	0.0337395	0.00478678	0.0927363	-0.376692	-0.751856	-0.534919	0	19.9217	25.5453	32.5658	36.03	14.4131	6.25599	10.8951	33.1574	43.1139
chrI:1635026-1635334	CELE1	NA	NA	NA	NA	NA	NA	NA	NA	0.148178	-0.39673	-0.0613565	-0.197767	-0.516429	-0.359629	0.335128	-0.585827	9.06656	2.32125	6.3385	4.42104	1.63365	3.65023	10.8726	2.02968	9.10426	9.33344
chrI:1686134-1686210	CELE1	NA	NA	1	NA	NA	0.999728	NA	NA	0.115144	0.161581	0.0969504	0.134673	0.229015	-0.250064	-0.536658	0.09399	54.361	57.4367	100.2	55.8163	62.0076	73.2416	53.3802	100.043	122.517	62.5618
chrI:1686716-1687084	CELE1	NA	NA	NA	NA	NA	NA	NA	NA	-0.714573	-0.963912	0.853483	-0.476459	-0.632365	-0.478367	-0.0165403	0.655744	1.88462	0	8.38159	4.06269	2.63019	0	1.88188	6.43282	2.5795	12.9692
chrI:1718423-1718789	CELE1	NA	NA	NA	NA	NA	NA	NA	NA	-0.0184748	-0.416262	0.769872	0.318051	0.07997	0.314625	0.347716	0.315045	5.70272	1.9544	4.86942	9.84959	6.77094	1.78744	1.89214	1.70891	0	7.94456
chrI:1821088-1821317	CELE1	NA	NA	NA	NA	NA	NA	NA	NA	0.43668	0	0.562753	0.2485	0.585338	0.49281	0.358428	0.317082	6.10476	0	4.93135	3.25898	8.26967	4.10375	3.0192	2.72683	0	0
chrI:1847218-1847588	CELE1	NA	NA	NA	NA	NA	NA	NA	NA	-0.203732	0.0260515	0.148614	-0.43983	0.0235924	0.126127	-0.317727	0.530539	1.89231	4.1875	4.81692	0	3.97665	4.80838	1.87174	8.2099	5.0172	5.12562
chrI:1878256-1878545	CELE1	NA	NA	1	NA	NA	NA	NA	NA	0.211476	-0.442038	0.715063	0.129724	-0.184854	-0.268351	-0.186918	-0.298112	19.2298	7.62521	29.1518	17.6343	11.7808	10.3988	11.7788	10.3479	19.1098	19.9989
chrI:1932592-1932944	CELE1	NA	NA	NA	NA	NA	NA	NA	NA	-0.136223	-0.496661	0.969787	-0.533187	-0.530791	1.31965	0.283382	0.970051	13.8841	8.63346	10.1251	8.11681	8.35886	15.1607	3.85474	10.1503	2.57661	21.9063
chrI:1952588-1952722	CELE1	NA	NA	NA	NA	NA	NA	NA	NA	0.835477	0.227509	0.502075	-0.27404	0.23342	0.21929	0	0.256993	31.0549	10.6261	9.67209	0	10.9284	3.49579	0	4.31244	0	7.27722
chrI:1968035-1968216	CELE1	NA	NA	NA	NA	NA	NA	NA	NA	0.925124	1.07414	0.227956	-0.254499	0.58014	-0.044981	-0.00360085	-0.0548495	27.0018	32.8362	6.70314	0	16.2125	3.60433	3.81547	3.19879	4.99749	5.22419
chrI:2008037-2008424	CELE1	NA	NA	NA	NA	NA	NA	NA	NA	-1.15211	-1.41097	0.59059	-0.539892	-0.621504	0.311862	0.490511	-0.0480405	1.79233	0	6.06748	7.2132	6.30381	3.64895	5.29674	1.61642	2.34419	19.9302
chrI:2033825-2034121	CELE1	0.98709	0.927866	1	0.951014	0.518976	0.999728	0.948934	0.893535	0.43295	-0.44037	1.02654	0.168996	0.636853	-0.0747058	-0.245625	0.425138	103.316	49.503	139.949	83.1817	121.172	59.8735	52.262	88.3697	84.1098	97.5313
chrI:2082383-2082767	CELE1	0.98709	0.652075	1	0.576412	0.323656	0.999728	0.9799	0.768138	-0.577019	-0.8471	-0.0195273	-0.749065	-0.858169	0.0305316	0.111427	0.556562	56.1845	44.8593	56.2329	48.8924	44.7749	58.5932	61.6685	86.5575	74.8838	120.513
chrI:2085894-2086243	CELE1	NA	NA	NA	NA	NA	NA	NA	NA	-0.161786	-0.289111	-0.625909	-0.737611	-0.670751	-1.00915	-0.569459	0.109746	8.00448	6.48808	1.6203	1.95157	2.88456	0	1.90373	6.91058	7.91693	13.7636
chrI:2087423-2087738	CELE1	NA	NA	NA	NA	NA	NA	NA	NA	0.197858	-0.253059	-0.0224711	-0.0101984	-0.0807744	-0.343992	0.250002	-0.0304223	4.42238	0	2.06603	2.16155	1.59746	0	4.39503	1.98472	2.8783	3.10894
chrI:2124256-2124792	CELE1	0.98709	NA	1	NA	NA	0.999728	0.994585	NA	-0.646058	0.255217	0.183302	0.258942	0.403802	0.0346632	0.0263578	0.121199	13.0242	30.2718	27.5813	30.3702	34.2667	24.1767	24.1509	26.1918	31.1963	32.636
chrI:2127184-2127724	CELE1	0.98709	NA	1	NA	NA	0.999728	NA	NA	0.0486779	-0.154218	0.315185	0.289356	0.113332	-0.0429259	-0.139636	0.219877	16.772	13.5882	19.0885	21.0618	17.7954	13.5735	12.524	17.3842	18.9626	21.4991
chrI:2127755-2127802	CELE1	NA	NA	NA	NA	NA	NA	NA	NA	0.608496	0.470461	0.209494	0.237012	0.309931	-0.377187	-0.00977223	-0.0389297	43.6021	32.3659	25.4161	14.2302	19.4059	0	14.467	13.0661	19.8299	0
chrI:2188477-2188615	CELE1	NA	NA	NA	NA	NA	NA	NA	NA	1.13221	0.712741	0.256676	1.01754	0.642267	-0.168506	-0.25417	0.416112	30.2565	15.9087	21.0164	26.0058	14.2456	11.5097	9.78936	25.7774	19.6304	0
chrI:2285287-2285410	CELE1	NA	NA	NA	NA	NA	NA	NA	NA	-0.0102339	0.226922	0.535291	-0.0101819	0.0756342	0.25113	0	0.754888	5.60827	12.5287	9.14685	5.50848	7.82694	3.8059	0	14.4478	0	7.92278
chrI:2323060-2323408	CELE1	NA	NA	NA	NA	NA	NA	NA	NA	-0.265868	0.413682	0.223315	-0.0102916	-0.299153	0.389317	1.09176	0.468385	0	6.50667	3.49562	1.95717	0	4.5841	11.6162	5.26224	2.72733	2.81497
chrI:2324789-2325109	CELE1	NA	NA	NA	NA	NA	NA	NA	NA	0.239032	0	-0.357593	0.236491	0.334668	-0.364125	-0.00906908	0.203694	2.18706	0	0	2.12789	3.02349	0	2.16329	3.76745	2.96522	0
chrI:2360837-2360960	CELE1	NA	NA	NA	NA	NA	NA	NA	NA	0.611108	0	0.570964	0	0	0	0	0	16.8782	0	9.14685	0	0	0	0	0	0	0
chrI:2361092-2361367	CELE1	NA	NA	NA	NA	NA	NA	NA	NA	0.439554	0.249289	-0.0687549	0.251431	0.466657	-0.0567896	-0.0201979	-0.0652546	5.03932	2.59879	2.05473	2.71582	5.20392	2.37677	2.41415	2.10935	3.44868	0
chrI:2373977-2374041	CELE1	NA	NA	NA	NA	NA	NA	NA	NA	0	0	NA	0.447599	0	NA	NA	NA	0	0	0	23.0636	0	0	0	0	0	0
chrI:2378072-2378385	CELE1	NA	NA	NA	NA	NA	NA	NA	NA	0.386777	0.409808	0.335349	-0.188128	0.266851	0.478342	0.227545	-0.101213	13.3727	13.7057	7.49739	4.35064	11.1291	9.27334	6.54502	3.70815	5.92796	9.28552
chrI:2395915-2396068	CELE1	0.98709	0.981742	1	0.718209	0.816289	0.999728	0.972953	0.939583	0.16931	0.0823221	-0.236029	0.391406	0.199673	0.0161604	0.107844	-0.247331	408.008	382.634	290.11	479.854	416.941	353.429	375.433	289.39	458.753	483.204
chrI:2415283-2415628	CELE1	NA	NA	NA	NA	NA	NA	NA	NA	0.461127	0.0352071	-0.111827	0.479428	0.138215	0.0853378	-0.668906	-0.740462	18.1657	10.8811	8.93875	18.5362	12.4533	11.1436	3.85148	3.49524	13.5104	13.8313
chrI:2435846-2436001	CELE1	NA	NA	NA	NA	NA	NA	NA	NA	-0.566585	-0.555228	0.188616	-0.554419	-0.655852	-0.0971783	-0.344392	0.417951	4.5003	4.59785	7.27058	4.80491	3.23589	3.0252	0	11.7726	5.83041	24.9877
chrI:2452752-2452914	CELE1	NA	NA	NA	NA	NA	NA	NA	NA	-0.00795141	-0.220958	0.612393	-0.222677	-0.0703583	0.122747	-0.361097	-0.377551	4.26642	0	15.4951	0	2.85731	5.79057	0	0	5.83949	6.02715
chrI:2453367-2453661	CELE1	NA	NA	NA	NA	NA	NA	NA	NA	-0.249202	-0.242404	0.303117	0.374746	0.232617	0	0	0	0	0	2.2131	7.39723	5.13354	0	0	0	0	3.33025
chrI:2465529-2465855	CELE1	NA	NA	NA	NA	NA	NA	NA	NA	-0.00790814	-0.000146143	0	0.0029227	-0.0766021	0	0.792636	0	2.14693	2.19347	0	2.29225	1.54373	0	6.28482	0	0	3.00436
chrI:2477795-2478073	CELE1	0.98709	NA	1	NA	NA	NA	NA	NA	-0.151732	0.433536	0.0999649	0.397091	0.194498	0.0123687	0.391819	0.356864	15.0503	28.9192	22.4781	27.884	22.5412	20.8733	29.1621	28.2555	26.5349	24.3086
chrI:2478864-2479022	CELE1	NA	NA	NA	NA	NA	NA	NA	NA	0.102232	-0.252696	0.222872	-0.855295	-0.397436	0.387843	0.748628	0.65631	30.6995	18.793	7.67277	4.71425	14.8916	10.062	17.116	14.929	5.9864	36.0783
chrI:2512174-2512505	CELE1	NA	NA	NA	NA	NA	NA	NA	NA	-0.457738	-0.204901	0	-0.203163	0.134214	0.230013	0.306901	0.269264	0	2.16044	0	2.25773	5.72899	1.42148	2.09161	1.75355	0	5.91822
chrI:2580539-2580890	CELE1	NA	NA	NA	NA	NA	NA	NA	NA	-0.720308	-0.390786	-1.00512	-0.87579	-0.827199	0.204793	-0.27078	0.808704	7.92138	12.7334	0	6.01042	6.83756	7.74935	3.86569	15.3965	7.87195	27.1013
chrI:2588019-2588240	CELE1	NA	NA	NA	NA	NA	NA	NA	NA	-0.616011	-0.351284	-0.313749	0.408386	0.0258084	0.333069	0.135826	-1.05328	3.13255	6.72994	10.6044	22.4365	13.2913	22.4487	18.3881	2.62243	20.8662	17.274
chrI:2617369-2617433	CELE1	NA	NA	NA	NA	NA	NA	NA	NA	0	0	0.511535	0	0.396367	0	0	0	0	0	17.4494	0	15.5323	0	0	0	0	0
chrI:2619573-2620007	CELE1	NA	NA	NA	NA	NA	NA	NA	NA	-0.245885	-0.241007	-0.0230512	-0.00544324	0.229772	-0.343351	-0.001489	0.375059	0	0	1.50084	1.57023	3.3018	0	1.59636	4.01503	2.09091	2.18575
chrI:2645394-2645476	CELE1	NA	NA	NA	NA	NA	NA	NA	NA	0	0	-0.729211	0.318963	0	0.0267092	0.212401	-0.380086	0	0	0	8.22953	0	17.0578	24.422	7.01421	22.9358	0
chrI:2711437-2711509	CELE1	NA	NA	NA	NA	NA	NA	NA	NA	-0.244773	0.0037861	0.466608	-0.243261	0.0930667	0	0.296795	0	0	9.82555	15.5371	0	13.2951	0	9.51254	0	0	13.0247
chrI:2715172-2715496	CELE1	NA	NA	NA	NA	NA	NA	NA	NA	-0.014113	0.00885615	0.686122	-0.193951	0.392612	-0.804299	-0.673319	-0.120289	6.46006	6.62091	21.7309	4.40805	11.9451	3.47052	4.10035	9.37192	14.2532	8.87394
chrI:2734003-2734461	CELE1	NA	NA	NA	NA	NA	NA	NA	NA	-0.665824	-0.271087	-0.421913	-0.655391	-0.665267	-1.72022	-0.720113	-1.03426	3.05903	6.38034	6.5513	3.12117	3.21425	0	4.41618	2.63475	14.3317	12.6355
chrI:2759996-2760315	CELE1	NA	NA	NA	NA	NA	NA	NA	NA	-0.0165036	0.0122358	1.09957	-0.207267	-0.824331	0.408964	0.51176	0.452861	6.561	6.91035	13.4774	4.47693	0	5.57472	6.33446	5.87973	2.97449	9.11142
chrI:2761671-2761785	CELE1	NA	NA	NA	NA	NA	NA	NA	NA	-0.0139732	0.504369	0.829881	0.181142	0.372017	0.804051	1.44532	0.829469	12.1519	31.1854	15.5398	18.3971	25.3184	15.5123	35.0082	15.5785	0	16.8107
chrI:2764410-2764752	CELE1	NA	NA	NA	NA	NA	NA	NA	NA	0.428575	0	-0.351197	0	0.594762	0.117564	0.24304	0.384855	4.05496	0	0	0	5.77299	2.75179	3.88517	5.09195	2.65173	0
chrI:2764781-2764982	CELE1	NA	NA	NA	NA	NA	NA	NA	NA	-0.00741882	-0.198423	-0.341441	-0.478925	0.393677	-0.0934823	-0.0171198	-0.0378891	6.91818	3.84546	0	0	14.6073	2.33629	3.29855	3.10481	4.71206	9.4139
chrI:2765020-2765096	CELE1	NA	NA	NA	NA	NA	NA	NA	NA	0.647535	0.55088	-0.308571	-0.231855	0.266632	0.228324	-0.565917	-0.105046	54.533	48.1215	16.9576	9.73463	31.2574	37.816	8.65333	23.2666	36.5353	25.1069
chrI:2767838-2768129	CELE1	NA	NA	NA	NA	NA	NA	NA	NA	-0.467495	-0.622177	-0.543956	-0.275965	-0.0712812	-0.871666	-0.757284	0.215837	7.14479	5.1166	3.88428	10.0402	13.1613	1.6162	2.37813	12.4248	12.7492	19.8619
chrI:2805652-2805805	CELE1	0.98709	0.75325	1	0.945256	0.648768	0.999728	0.635593	0.84378	0.330178	-0.539829	0.261287	-0.138538	0.370959	-0.0979892	-0.563537	-0.395436	394.891	205.28	326.468	277.786	406.366	250.37	176.535	200.98	354.778	414.469
chrI:2859080-2859364	CELE1	0.98709	NA	1	NA	NA	NA	NA	NA	-1.17069	-0.143674	-0.106823	-0.473366	-0.781445	-0.216326	-1.25041	-0.141289	7.36674	28.3104	15.4335	19.6401	13.8957	13.5287	2.33792	14.6149	22.6365	44.2576
chrI:2868131-2868321	CELE1	0.98709	NA	1	NA	NA	NA	NA	NA	-1.11421	0.106571	0.459597	-0.941687	-0.997587	0.166063	-0.182655	0.200435	14.5986	58.511	39.9458	18.5774	18.0915	30.0702	21.2254	31.6584	34.2198	70.8513
chrI:2990974-2991267	CELE1	NA	NA	1	NA	NA	NA	NA	NA	0.714975	1.11422	0.988667	0.85813	1.04684	-0.685619	0.155372	-0.873761	11.8945	19.7199	26.8263	14.3923	17.9571	3.21042	11.6186	2.13324	12.8063	3.23403
chrI:2991717-2992017	CELE1	NA	NA	NA	NA	NA	NA	NA	NA	0.570816	0.00847807	0.791368	-0.209428	-0.135854	1.13772	0.355836	0.810622	13.9503	4.76588	5.65221	2.26927	3.35414	9.67385	2.21364	5.95193	0	6.31763
chrI:3039945-3040221	CELE1	NA	NA	NA	NA	NA	NA	NA	NA	-0.375621	0.295466	0.0244368	0.140861	0.206907	-0.602267	0.443114	0.0433176	5.06893	15.7513	10.2366	12.8097	13.874	4.07191	17.1425	10.6711	13.4396	13.9583
chrI:3052357-3052653	CELE1	NA	NA	NA	NA	NA	NA	NA	NA	-0.43808	-0.423692	0.0968675	0.308764	-0.784348	-0.360572	-0.967453	-0.990687	2.36379	2.41503	7.92653	11.9471	0	3.79771	0	0	9.47211	9.81702
chrI:3077205-3077577	CELE1	0.98709	NA	1	NA	NA	NA	NA	NA	-0.696994	0.517736	0.891891	-0.994969	-0.214436	0.846475	0.556596	1.06868	9.33981	35.2516	13.5426	5.85036	16.8605	13.0826	8.93172	16.2111	4.87691	28.6332
chrI:3086137-3086465	CELE1	0.98709	NA	1	NA	NA	NA	NA	NA	-0.0254093	-0.316151	1.08199	0.000646276	0.119144	0.280727	0.824599	0.805773	19.0641	13.4426	26.2175	19.6962	22.1841	12.2789	20.6797	20.2855	11.3154	26.2982
chrI:3142328-3142374	CELE1	NA	NA	NA	NA	NA	NA	NA	NA	-0.328891	-0.324434	-0.307989	-0.327286	-0.344888	-0.31172	-0.0152289	-0.0431673	0	0	0	0	0	0	14.1767	12.3868	20.2519	20.9027
chrI:3143469-3143740	CELE1	NA	NA	NA	NA	NA	NA	NA	NA	0	0.245189	0	0	0.185678	0	0.571721	0.300843	0	2.637	0	0	1.85588	0	5.00265	2.30578	0	0
chrI:3148963-3149134	CELE1	0.98709	0.97982	1	0.961484	0.90034	0.999728	0.95472	NA	-0.554192	-0.20775	-0.0906578	0.132207	-0.173676	-0.296243	-0.244541	-0.0599527	81.0944	109.79	94.507	144.407	112.399	80.3658	83.8027	96.6045	134.66	174.491
chrI:3157543-3157911	CELE1	NA	NA	1	NA	NA	NA	NA	NA	0.114679	-0.31204	0.49725	-0.330408	0.337405	0.949497	0.861338	0.854034	11.3616	5.99271	10.9905	5.91378	14.6248	18.5576	16.5561	16.3869	7.73851	13.1406
chrI:3166544-3166746	CELE1	NA	NA	NA	NA	NA	NA	NA	NA	-0.00965153	0.309303	0.762266	0.139087	-0.05703	-0.187013	-0.31167	0.329412	10.3425	17.9598	20.4003	13.4591	9.56197	4.64957	3.42076	11.9148	9.3777	14.0513
chrI:3184872-3185256	CELE1	0.98709	NA	1	NA	NA	0.999728	NA	NA	1.01863	0.623694	0.180782	0.589077	0.824666	-0.0668063	0.132805	0.163161	36.3324	25.3015	23.877	24.619	30.352	19.2818	22.7177	23.3835	26.7559	17.6159
chrI:3191092-3191294	CELE1	NA	NA	NA	NA	NA	NA	NA	NA	0.195412	0.218698	-0.0911547	0.00281077	-0.296692	-0.605524	-0.559206	0.100252	6.85149	7.35984	8.80333	3.69244	0	3.23147	3.2823	11.6932	13.6499	4.83953
chrI:3221089-3221253	CELE1	NA	NA	NA	NA	NA	NA	NA	NA	-1.13471	-0.839897	0.307848	-0.865234	-0.364169	0.1277	-0.0167193	-0.341423	0	4.70777	13.748	4.1397	14.3501	10.8116	8.2468	3.80104	11.2811	34.958
chrI:3221741-3221911	CELE1	NA	NA	NA	NA	NA	NA	NA	NA	-0.0151757	-0.347875	0.0744351	-0.171661	-0.364912	-0.217124	-1.31115	-0.996531	16.306	8.38906	22.4061	12.3723	8.62771	14.8755	0	3.40456	27.0895	22.4259
chrI:3254487-3254775	CELE1	NA	NA	NA	NA	NA	NA	NA	NA	-0.264564	-0.0998274	0.271377	0.00413547	-0.475731	-0.00313339	-0.584652	0.0949305	9.62527	12.6154	10.405	14.8715	6.5814	7.1688	2.30556	8.36921	9.73432	19.7399
chrI:3260357-3260416	CELE1	NA	NA	NA	NA	NA	NA	NA	NA	0	0	NA	0.443001	0	NA	NA	NA	0	0	0	23.877	0	0	0	0	0	0
chrI:3263464-3263801	CELE1	NA	NA	NA	NA	NA	NA	NA	NA	-0.599463	-0.991869	0.628353	-0.249262	-0.654138	-0.172581	-0.304269	-0.0812057	6.2116	2.29817	10.5744	10.8915	5.74284	2.79249	1.97132	3.57796	5.50704	19.9719
chrI:3275823-3276164	CELE1	NA	NA	1	NA	NA	NA	NA	NA	-0.178538	0.297379	0.409381	-0.0183612	-0.372337	0.427826	0.342144	0.669116	6.11959	12.9316	10.7015	7.9889	4.31386	10.7358	9.82351	14.276	8.34945	11.213
chrI:3318624-3318678	CELE1	NA	NA	NA	NA	NA	NA	NA	NA	0.198117	0.221943	-0.977465	-0.257635	0.371137	-0.675286	-0.65311	-0.978356	25.4086	27.1645	0	0	36.7126	11.9271	12.1147	0	69.2245	17.8623
chrI:3331379-3331743	CELE1	NA	NA	1	NA	NA	NA	NA	NA	-0.600513	0.179461	0.800835	0.00224661	-0.110145	0.024851	0.275523	-0.712693	1.92342	10.4778	22.5479	8.03219	6.59403	10.2791	13.1635	3.31329	12.5754	10.6797
chrI:3335103-3335460	CELE1	NA	NA	NA	NA	NA	NA	NA	NA	-0.198041	-0.653274	0.343834	-0.396121	-0.168955	-0.69832	-0.294919	-0.0790704	3.90356	0	6.81548	2.09376	4.12106	0	1.86119	3.2524	5.08125	8.23261
chrI:3337755-3338123	CELE1	NA	NA	NA	NA	NA	NA	NA	NA	0.867282	0.726311	-0.753939	0.890104	0.151995	-0.360146	-0.656362	0.290281	7.57438	5.99271	3.07374	7.94512	1.36802	6.11339	3.76377	13.1095	12.6683	0
chrI:3366294-3366488	CELE1	NA	NA	NA	NA	NA	NA	NA	NA	-0.540381	-0.515277	-0.0816339	-0.527426	0.213871	-0.324328	-0.287836	-0.0631045	3.60024	3.9835	5.81646	3.84393	19.7082	3.36405	3.41696	6.2018	9.32866	19.5037
chrI:3412498-3412610	CELE1	NA	NA	NA	NA	NA	NA	NA	NA	0.299332	0.197265	-0.287943	-0.433122	-0.0638284	-0.445686	-0.888112	-0.669198	31.0054	26.97	20.8335	6.0447	17.1777	17.4156	6.14527	11.1004	41.7424	25.8022
chrI:3413880-3414213	CELE1	NA	NA	NA	NA	NA	NA	NA	NA	-0.0123911	-0.677631	-0.0997834	-0.203616	0.0881207	0.0711792	0.870822	0.501	6.28599	0	3.39584	4.09013	7.32299	4.78997	14.0487	8.98468	5.44637	8.63483
chrI:3463065-3463349	CELE1	NA	NA	NA	NA	NA	NA	NA	NA	0.284706	-0.64436	-0.121229	-0.00601462	-0.516735	0.317656	-0.249787	0.403202	12.3166	0	5.96953	7.4234	1.63418	11.227	4.87309	12.5721	9.72254	10.1194
chrI:3505547-3505843	CELE1	NA	NA	NA	NA	NA	NA	NA	NA	0.296828	0.33686	-0.516158	0.315877	0.269395	-0.339144	-0.478093	-0.82847	11.7967	12.476	4.3964	12.171	11.2401	6.00643	4.48691	1.9602	12.677	9.60407
chrI:3510837-3511168	CELE1	NA	NA	1	NA	NA	NA	NA	NA	-0.0187446	-0.107502	-0.661002	-0.673812	-0.552972	-0.739579	-0.589852	-1.97568	12.6477	11.34	9.574	4.31511	5.84663	8.77057	10.2041	0	25.1659	17.3737
chrI:3552187-3552340	CELE1	NA	NA	NA	NA	NA	NA	NA	NA	-0.758108	-0.305242	0.429618	-0.744136	-0.521277	0.161604	0.518003	0.617922	4.55875	14.3592	11.6044	4.86731	9.32651	7.32416	13.5276	15.4137	5.90613	31.2809
chrI:3557679-3557797	CELE1	NA	NA	NA	NA	NA	NA	NA	NA	0.252752	-0.159076	-0.501406	0.00183429	0.374005	-0.555613	-0.681135	0.418746	35.1748	18.0823	15.7381	24.6366	40.4508	14.9908	11.4346	45.5427	38.9269	32.757
chrI:3582509-3582647	CELE1	0.98709	NA	1	NA	NA	NA	NA	NA	0.112885	0.530238	0.340565	0.254939	1.12953	1.08186	1.30754	1.17914	30.2089	49.4389	17.5535	35.8338	87.1383	39.2485	49.149	43.1782	13.3912	34.884
chrI:3613794-3613936	CELE1	NA	NA	1	NA	NA	NA	NA	NA	0.131838	-0.131589	-0.447956	0.26836	0.116523	0.0375367	-0.958855	-0.124573	24.5008	15.8799	20.4286	29.5898	23.891	36.1375	9.51554	30.3861	45.7062	26.5959
chrI:3682332-3682705	CELE1	NA	NA	NA	NA	NA	NA	NA	NA	-0.149432	-0.780495	0.34642	-0.607229	-0.41136	0.501947	-0.00956844	1.2259	11.2097	3.99478	6.52391	5.65687	7.88951	8.27777	3.71345	17.7244	4.86387	18.134
chrI:3795724-3795991	CELE1	NA	NA	NA	NA	NA	NA	NA	NA	-0.3854	-0.373839	0.605343	-0.00221897	-0.474972	0.122451	-0.0132019	0.200259	2.61958	2.67636	8.78426	7.89429	1.88358	3.52187	2.48622	4.34462	3.39382	10.6433
chrI:3807024-3807369	CELE1	NA	NA	NA	NA	NA	NA	NA	NA	0.173662	0.499137	-0.0716069	0.00126843	0.13166	-0.425495	0.23408	0.16346	6.08711	10.5371	3.52593	4.14051	5.61006	1.36396	5.9397	5.30787	5.25748	5.49597
chrI:3853182-3853465	CELE1	NA	NA	NA	NA	NA	NA	NA	NA	0.177888	-0.220946	0.374736	-0.23527	0.144628	-1.25649	-0.794534	-0.844903	7.36936	2.52558	15.1858	2.40511	6.69727	0	2.44512	2.20835	13.1083	6.80714
chrI:3871644-3872016	CELE1	NA	NA	NA	NA	NA	NA	NA	NA	0.402197	0.239389	-0.0550218	0.00217876	0.368553	0.37803	0.904848	-0.431614	5.61099	4.00549	1.75031	2.00956	5.09926	4.28915	9.23316	0	2.55184	2.63385
chrI:3885012-3885360	CELE1	NA	NA	NA	NA	NA	NA	NA	NA	-0.367738	-0.149565	-1.43408	-0.345712	0.138077	-1.14832	-0.522035	-1.09633	4.00422	6.33614	0	4.29551	10.013	1.35224	5.96918	1.66814	16.0004	11.0787
chrI:3888645-3888925	CELE1	0.98709	0.941731	1	0.914462	0.899832	0.999728	0.950896	0.842268	0.0276866	-0.245128	0.0389237	-0.16055	-0.103286	-0.160569	-0.135578	-0.308033	305.676	250.953	290.459	266.121	277.968	252.022	256.549	227.147	373.887	402.188
chrI:3911057-3911430	CELE1	NA	NA	NA	NA	NA	NA	NA	NA	-0.19821	-0.41593	-0.317212	-0.199405	-0.440125	-0.0772819	-0.00762704	-0.0378809	1.85943	0	0	1.82634	0	1.26185	1.78157	1.55663	2.43194	5.25361
chrI:3982338-3982502	CELE1	NA	NA	NA	NA	NA	NA	NA	NA	0	0.519341	0.312619	0.872669	0.170953	0.310975	0	0	0	9.05483	3.95676	17.7682	2.82268	3.97569	0	0	0	0
chrI:4135447-4135793	CELE1	0.98709	NA	1	NA	NA	NA	NA	NA	0.168991	-0.19714	0.162851	-0.155965	-0.354195	0.174374	0.12475	0.755514	36.2457	25.8337	12.4288	26.9316	22.3756	12.4715	11.8452	22.1997	13.5933	41.7389
chrI:4142902-4143290	CELE1	NA	NA	NA	NA	NA	NA	NA	NA	-0.00732994	-0.000810001	0.31536	-0.234167	-0.0690654	0	0	0.30761	1.80475	1.84387	1.67832	0	1.29768	0	0	1.61227	0	2.52551
chrI:4204257-4204561	CELE1	NA	NA	NA	NA	NA	NA	NA	NA	0.956269	0.204172	-0.359367	0.159757	0.271006	0.000102159	-0.0286001	-0.100651	25.2546	9.99217	3.71872	9.17613	10.9453	6.79273	6.64599	6.02139	9.22367	9.45584
chrI:4586884-4587216	CELE1	0.98709	NA	1	NA	NA	NA	NA	NA	-1.03011	-0.640088	0.000798032	-0.77879	-1.47379	0.541208	-0.416443	0.484203	14.6981	22.4331	10.4756	19.4596	8.86089	18.6647	6.00276	17.8882	14.0378	55.1996
chrI:4587634-4587709	CELE1	NA	NA	NA	NA	NA	NA	NA	NA	0.135655	0.030667	0.324909	0.28226	-1.03265	0.0312425	-0.28143	0.320056	46.0131	40.1001	32.1045	55.6755	0	18.6289	8.76719	31.825	23.9354	50.8744
chrI:4610832-4611168	CELE1	NA	NA	1	NA	NA	NA	NA	NA	0.313423	-0.873527	-0.51755	0.337001	0.518625	0.350297	-0.0371387	0.501511	18.6704	2.12838	5.04841	19.2286	22.8077	15.8805	10.0527	18.3434	13.9967	17.3974
chrI:4696110-4696413	CELE1	NA	NA	NA	NA	NA	NA	NA	NA	-0.262467	0.422569	0.259773	0.413763	0.485885	0.206694	0.366061	-0.283939	0	7.46983	7.46191	7.39703	8.04565	6.81507	9.13704	2.06306	5.98384	3.12764
chrI:4703671-4704032	CELE1	NA	NA	1	NA	NA	NA	NA	NA	0.673583	0.19618	0.412885	0.98632	0.571393	0.528176	-0.0336888	-0.128122	15.46	8.2544	15.0469	21.8582	13.7289	16.8827	9.28078	8.41402	12.7964	8.05429
chrI:4706004-4706171	CELE1	NA	NA	NA	NA	NA	NA	NA	NA	0.185525	-0.22488	0.528529	-0.00529122	-0.0776495	0	0	0	8.3577	0	7.26173	4.06578	2.77227	0	0	0	0	5.65954
chrI:4751308-4751584	CELE1	NA	NA	NA	NA	NA	NA	NA	NA	0.696045	-0.195898	0.523707	0.455705	0.703475	0.954111	-0.017137	0.346464	17.6217	2.5894	10.8558	12.3294	17.3778	17.3269	5.01383	8.73178	6.71979	6.86501
chrI:4824312-4824677	CELE1	NA	NA	NA	NA	NA	NA	NA	NA	-0.00350241	0.00454421	0.325555	0.00733412	0.0699683	-0.701449	-0.666275	-0.0801724	1.91816	1.95974	6.43219	2.048	2.54504	0	0	3.18131	5.08574	2.59782
chrI:4910358-4910544	CELE1	NA	NA	NA	NA	NA	NA	NA	NA	-0.190908	-0.385624	0.939215	-0.642389	-0.486923	0.261674	0	0.305895	7.43771	3.83564	12.5892	0	2.4906	2.5237	0	3.11326	0	15.5917
chrI:4910853-4910933	CELE1	0.98709	NA	1	NA	NA	0.999728	0.957264	NA	-0.333251	-0.855474	0.568405	-0.689357	-0.719324	0.110999	-0.241959	-0.262479	206.788	128.38	259.868	150.747	146.158	180.034	135.433	132.151	218.571	369.353
chrI:4914686-4914785	CELE1	NA	NA	NA	NA	NA	NA	NA	NA	-0.372128	0.0181391	-0.063479	-0.000560228	0.215167	-0.2101	0.614549	0.0929326	14.0409	29.2858	19.586	28.6523	38.431	14.1579	46.9225	24.187	27.7092	38.3484
chrI:5745794-5745937	CELE1	NA	NA	NA	NA	NA	NA	NA	NA	0	0	NA	0	0.261956	NA	NA	NA	0	0	0	0	3.23432	0	0	0	0	0
chrI:5861852-5862150	CELE1	NA	NA	NA	NA	NA	NA	NA	NA	-0.0112836	0.35066	0.741832	-0.00245616	0.117096	0.75995	-0.0132801	0.404812	4.69597	9.79457	9.77019	4.79136	6.23066	10.3541	2.22845	5.84127	3.04195	6.46565
chrI:7059552-7059692	CELE1	NA	NA	NA	NA	NA	NA	NA	NA	0.654172	0.486651	0.822187	0.25548	0.75118	0.267647	0.370776	0.31859	14.8433	10.174	12.6743	4.84433	17.0697	3.34703	4.92493	4.12893	0	0
chrI:7553346-7553713	CELE1	NA	NA	NA	NA	NA	NA	NA	NA	0.362765	0.204551	0.217408	0.002564	0.0578415	-0.378782	0.243609	0.584086	5.70522	3.89818	3.54818	2.03686	2.5312	0	3.69761	6.81708	2.58651	2.66963
chrI:7728183-7728474	CELE1	0.98709	NA	1	NA	NA	0.999728	NA	NA	-0.0307576	0.402471	-0.414612	0.310382	0.111568	0.154863	0.158722	-0.711574	35.86	53.0109	27.01	49.0622	40.8114	44.1063	44.1257	20.554	51.2864	49.4924
chrI:8130406-8130539	CELE1	NA	NA	NA	NA	NA	NA	NA	NA	0.13085	-0.161905	-0.800169	-0.186532	-0.576075	-1.42064	-0.983686	0.198968	26.0475	16.5023	13.9764	15.7886	7.24284	3.52187	9.94487	44.4535	48.776	29.0901
chrI:8313769-8314034	CELE1	NA	NA	NA	NA	NA	NA	NA	NA	0.556974	0.00229218	0.294285	-0.271743	0.240591	0	0.748261	0.273181	10.5322	2.69648	2.45438	0	5.54639	0	7.51473	2.18865	0	3.69333
chrI:8360244-8360366	CELE1	NA	NA	NA	NA	NA	NA	NA	NA	0.121913	-0.553852	0.0954519	-0.1548	-0.0976115	-0.577299	-0.251951	0.133344	28.377	6.3153	13.8318	18.2821	19.8852	0	5.64565	15.2969	15.477	31.6917
chrI:8408548-8408850	CELE1	0.98709	NA	1	NA	NA	NA	NA	NA	-0.489611	-0.189945	-0.154339	-0.212886	0.132779	-0.575178	-1.58154	-0.761851	11.5631	16.9633	19.8485	16.6581	24.4744	12.7251	2.2918	10.3494	30.995	28.5548
chrI:8726169-8726492	CELE1	NA	NA	NA	NA	NA	NA	NA	NA	-0.479485	0.184776	0	-0.47632	0.0235332	0.278186	0.533012	0.273814	0	6.64134	0	0	4.55351	2.02466	4.28651	1.93572	0	5.96675
chrI:9545861-9546205	CELE1	NA	NA	NA	NA	NA	NA	NA	NA	-1.04447	-0.396151	-0.0843895	-0.433282	0.142203	-0.201825	-0.227378	-0.550555	2.01573	8.66114	7.32088	8.11223	16.7658	6.00517	5.87544	3.37495	10.668	19.6583
chrI:9605265-9605602	CELE1	NA	NA	1	NA	NA	NA	NA	NA	0.374663	0.178495	0.0354216	0.281701	0.518851	0.308239	0.12975	0.397572	14.5198	11.1387	11.0819	12.9123	17.113	14.7444	12.2437	16.1674	13.9553	11.2521
chrI:10032266-10032407	CELE1	0.98709	NA	1	NA	NA	NA	NA	NA	0.580287	0.634827	1.19998	0.823744	1.3022	-0.0300729	-0.488719	0.709629	34.4681	36.6155	66.9189	45.1656	71.6278	19.2097	9.3846	42.5828	25.9188	20.3101
chrI:10372907-10373186	CELE1	NA	NA	NA	NA	NA	NA	NA	NA	-1.06424	-0.134124	0.139884	-0.330513	-0.259793	-0.678498	-0.0219777	0.160602	0	10.6718	6.38241	7.79351	8.59579	0	4.75933	6.7197	6.64779	17.3174
chrI:10402969-10403251	CELE1	0.98709	NA	1	NA	NA	NA	NA	NA	-0.632289	-0.47376	0.709554	-0.857425	-1.16635	0.731568	0.525375	0.795046	19.7055	23.4415	17.8495	14.9517	10.4264	18.2603	14.5239	19.1505	9.9407	51.0664
chrI:10747795-10748124	CELE1	NA	NA	NA	NA	NA	NA	NA	NA	-0.232476	-0.00177455	0.591208	-0.231706	-0.243475	0	0	0	0	2.17353	3.69688	0	0	0	0	0	0	2.97705
chrI:10749183-10749450	CELE1	NA	NA	NA	NA	NA	NA	NA	NA	0.504156	0.724266	-0.393666	0	0.542101	0.228471	0.846078	-0.394878	5.21445	8.25116	0	0	5.50499	4.89544	12.7457	0	3.55163	0
chrI:10774340-10774715	CELE1	0.98709	NA	1	NA	NA	0.999728	NA	NA	-0.506854	-0.81854	0.851159	-0.498331	-0.0362299	0.0777633	0.28192	0.608087	22.3529	16.0524	33.7262	22.3302	34.7946	16.0407	20.1658	27.1596	20.1394	48.6346
chrI:10889531-10889888	CELE1	NA	NA	1	NA	NA	NA	NA	NA	-0.14444	-0.272691	-0.401941	-0.122509	0.234174	-0.822121	-1.08427	-0.937238	7.8256	6.0106	9.98366	8.18925	13.7732	5.7871	3.72238	4.8786	20.6794	13.2794
chrI:10939085-10939466	CELE1	0.98709	NA	1	NA	NA	0.999728	0.975691	NA	-1.05885	-0.661586	0.188529	-0.859178	-0.689092	0.487582	0.164905	0.260345	18.2915	26.9104	34.232	22.3277	26.3193	44.2901	33.8031	36.7016	38.8711	65.6249
chrI:11057013-11057395	CELE1	NA	NA	1	NA	NA	0.991162	NA	NA	-0.244729	0.129771	-0.536839	-0.820076	-0.551237	1.0068	0.57444	-0.358946	12.7793	19.3491	14.6697	5.69761	8.81818	54.5741	38.8606	17.073	31.4244	22.5903
chrI:11082843-11083042	CELE1	NA	NA	NA	NA	NA	NA	NA	NA	0.443674	-0.707925	-0.410624	-0.430135	-0.0471554	-0.427364	-0.389483	0.808251	20.9621	0	0	3.74783	9.7054	0	0	14.7795	4.54772	14.4202
chrI:11168902-11169085	CELE1	NA	NA	NA	NA	NA	NA	NA	NA	-0.40297	-0.174625	0.125681	-0.193467	0.192605	-0.169881	-0.290715	0.479003	3.77949	7.79636	9.71237	7.42447	16.0363	5.12969	3.774	16.7982	10.3461	15.6741
chrI:11333648-11333824	CELE1	NA	NA	NA	NA	NA	NA	NA	NA	-0.0033633	-0.228488	NA	-0.229856	-0.241704	NA	NA	NA	3.92896	0	0	0	0	0	0	0	0	5.37177
chrI:11832571-11832874	CELE1	NA	NA	NA	NA	NA	NA	NA	NA	0	0	-0.527328	0	0.447962	-0.538945	-0.49953	-0.274665	0	0	2.14759	0	4.72461	2.15786	2.28426	4.12613	9.11488	0
chrI:11969984-11970069	CELE1	NA	NA	NA	NA	NA	NA	NA	NA	-0.328891	-0.324434	NA	-0.327286	-0.344888	NA	NA	NA	0	0	0	0	0	0	0	0	0	11.4235
chrI:12180058-12180393	CELE1	NA	NA	NA	NA	NA	NA	NA	NA	-0.218651	-0.216003	0.580677	-0.00506352	-0.065622	0	0	0	0	0	3.37562	2.03289	1.38614	0	0	0	0	2.82977
chrI:12429511-12429796	CELE1	NA	NA	NA	NA	NA	NA	NA	NA	0	0.448462	0.391579	0	0	0	0	0	0	5.22394	1.98288	0	0	0	0	0	0	0
chrI:12646449-12646776	CELE1	NA	NA	NA	NA	NA	NA	NA	NA	0	0.248906	0.41165	0.252342	0.483216	-0.385351	-0.0180167	-0.054622	0	2.18678	5.4484	2.28526	4.49798	0	2.03142	1.77494	2.90194	0
chrI:12735466-12735519	CELE1	NA	NA	NA	NA	NA	NA	NA	NA	0.240229	0	NA	0	0.186852	NA	NA	NA	12.8783	0	0	0	9.34812	0	0	0	0	0
chrI:12778631-12779009	CELE1	NA	NA	NA	NA	NA	NA	NA	NA	-1.32618	0.250122	1.12313	-0.41788	-0.205744	0.896843	0.535549	0.658438	0	17.6608	10.9268	7.73549	10.1401	8.44249	5.34836	6.3818	2.39985	17.8113
chrI:12787557-12787720	CELE1	NA	NA	NA	NA	NA	NA	NA	NA	-0.647936	-0.642275	0.279363	-0.396744	-0.476471	0	0	0.472104	0	0	3.98089	4.16495	2.83989	0	0	7.09975	0	17.5856
chrI:12819943-12820309	CELE1	NA	NA	1	NA	NA	NA	NA	NA	-0.987481	-0.431955	-0.159584	-0.678853	-0.592737	-0.868931	-1.08213	-0.43533	7.6337	15.7974	23.2692	11.892	13.2226	11.7919	9.38411	18.0625	35.6184	34.1105
chrI:12822718-12823058	CELE1	0.98709	NA	1	NA	NA	0.999728	NA	NA	0.146692	0.292561	0.236392	-0.448641	0.336789	0.201889	-0.964479	-0.00166713	24.6472	28.5662	28.118	12.6037	29.3693	27.3057	8.14563	22.5904	30.2083	28.4392
chrI:12852063-12852228	CELE1	NA	NA	NA	NA	NA	NA	NA	NA	-0.203096	-0.413452	0.835502	-0.691056	-0.513938	1.20457	0	0.330496	8.41851	4.32087	10.7655	0	3.04095	18.6499	0	3.77814	0	17.5642
chrI:12912293-12912388	CELE1	NA	NA	NA	NA	NA	NA	NA	NA	-0.328891	-0.324434	0	-0.327286	-0.344888	0	0	0	0	0	0	0	0	0	0	0	0	10.2336
chrI:12960079-12960161	CELE1	NA	NA	NA	NA	NA	NA	NA	NA	-0.193623	-0.363565	0.828281	-0.185103	-0.567477	0.505246	0	0.313062	25.2156	18.0006	22.5643	25.49	11.6933	11.3718	0	7.01421	0	46.5838
chrI:13021996-13022304	CELE1	NA	NA	NA	NA	NA	NA	NA	NA	-0.19087	0.015794	-0.294672	-0.0228961	-0.327356	-0.253986	-0.198643	-0.276275	4.50114	7.34896	5.50587	6.63157	3.14091	6.36882	6.65093	5.79784	11.9109	9.53811
chrI:13296035-13296288	CELE1	NA	NA	NA	NA	NA	NA	NA	NA	-0.393272	-0.500309	0.136763	-0.389387	-0.64824	-1.02364	0.132896	0.270824	13.7938	11.7641	15.9665	13.7078	9.62944	2.58263	16.2928	18.6906	18.4039	30.569
chrI:13373397-13373690	CELE1	NA	NA	NA	NA	NA	NA	NA	NA	-0.00242366	-0.212794	-0.264151	-0.214844	0.0730785	-0.571168	0.196416	-0.065063	2.38791	0	2.22063	0	3.16831	0	7.08587	3.96041	6.18737	3.23403
chrI:14350053-14350238	CELE1	NA	NA	NA	NA	NA	NA	NA	NA	-0.0260686	-0.266442	0.0587312	-0.147409	-0.0720205	0.141349	0.499329	-0.102055	22.5043	16.065	12.1958	19.0768	21.2918	13.6759	22.0982	9.87378	15.1248	31.3511
chrI:14430611-14430886	CELE1	NA	NA	NA	NA	NA	NA	NA	NA	-0.386425	-0.149001	-0.259569	-0.602239	0.0186113	-0.366205	-0.473959	-0.283719	5.06331	8.22764	4.73091	2.71582	10.4078	3.41979	2.516	4.38171	10.3461	14.0089
chrI:14479707-14480011	CELE1	0.98709	NA	1	NA	NA	0.999728	NA	NA	1.05895	0.754945	-0.402686	0.646556	0.498493	-0.511149	-0.638629	-0.493542	57.3712	44.0866	27.7181	40.0344	35.0031	25.2832	22.4912	25.5518	52.0825	28.5749
chrI:14519429-14519779	CELE1	NA	NA	1	NA	NA	NA	NA	NA	-0.729457	-0.407534	0.507905	-0.302285	-0.725183	1.3304	0.776977	0.65923	8.00053	12.6001	8.56708	14.5696	8.29521	20.8538	11.7102	10.2082	5.30308	27.629
chrI:14600540-14600845	CELE1	0.98709	NA	1	NA	NA	NA	NA	NA	0.0692434	0.0187289	0.16955	-0.813544	-0.0942059	-0.393516	-1.42764	-0.274922	22.8129	21.485	21.5072	7.13132	19.0302	11.9988	2.17747	13.906	24.47	28.4815
chrI:14662114-14662392	CELE1	NA	NA	1	NA	NA	NA	NA	NA	0.177838	-0.672843	0.288704	-0.374461	0.0972942	-0.367645	-0.764497	-0.545011	25.068	7.71252	29.379	12.7179	22.6811	15.5112	9.65353	12.6813	29.9465	27.4899
chrI:14748089-14748348	CELE1	NA	NA	NA	NA	NA	NA	NA	NA	0.554376	0.232941	0.440905	-0.270708	0.0837012	0.362846	-0.00483758	0.412088	10.7498	5.74633	7.20322	0	3.88307	6.15327	2.67083	6.71746	3.49825	3.77856
chrI:14754253-14754557	CELE1	NA	NA	NA	NA	NA	NA	NA	NA	-1.03133	-0.308999	0.64574	-0.521762	-0.25473	0.528727	0.419955	0.155456	0	7.2502	11.7185	4.69711	7.76316	9.88736	8.92276	6.1689	6.10289	16.0017
chrI:14800916-14801096	CELE1	NA	NA	NA	NA	NA	NA	NA	NA	-0.91255	-0.362542	0.303769	0.146098	-0.759822	0.88385	0.653833	1.33321	0	8.2544	3.13318	19.6038	2.57316	10.4294	7.5178	20.2931	0	21.3616
chrI:15006409-15006586	CELE1	NA	NA	NA	NA	NA	NA	NA	NA	-0.011582	1.01436	-0.319868	0.0111487	0.59304	0.679339	-0.0171671	0.318478	7.85097	37.938	3.66779	8.42209	22.0293	21.6612	7.48659	13.3355	10.2196	10.6832
chrI:15006917-15007001	CELE1	NA	NA	NA	NA	NA	NA	NA	NA	-0.18746	0.00614376	-0.980136	-0.187446	0.0252179	-0.333114	-0.646799	-0.699486	8.18148	16.8768	7.68078	8.0359	17.8164	26.5393	16.0085	14.757	54.9953	22.3718
chrI:15017782-15017960	CELE1	NA	NA	NA	NA	NA	NA	NA	NA	-0.0152329	0.299381	0.463835	-0.174005	0.113646	0.617485	0.547451	1.00822	15.6512	24.3749	9.98366	11.8194	18.8679	12.6025	11.4812	20.5198	5.08125	21.4237
chrII:29185-29552	CELE1	NA	NA	NA	NA	NA	NA	NA	NA	-0.0158354	-0.204487	-0.421096	-0.216578	0.379977	-1.15324	-0.794691	-0.121007	3.79748	2.11082	6.86332	2.03686	8.01814	1.78258	3.69761	9.9811	15.4042	5.33927
chrII:267972-268280	CELE1	NA	NA	NA	NA	NA	NA	NA	NA	0.402427	0.43903	0.53375	0.00640303	0.508092	0.467782	0.340349	0.30368	6.79456	7.34896	3.67058	2.42578	8.04186	3.05457	2.2473	2.02968	0	3.07703
chrII:537147-537210	CELE1	NA	NA	NA	NA	NA	NA	NA	NA	-0.0036667	0.00317386	0.413557	-0.223132	-0.239886	0	0	0	10.866	11.2073	10.201	0	0	0	0	0	0	14.8563
chrII:576812-577152	CELE1	NA	NA	NA	NA	NA	NA	NA	NA	0.224717	0	0.147096	0.234482	0	-0.111792	-0.679045	-0.358448	2.05879	0	5.24069	2.19814	0	3.30768	0	1.70727	5.45859	0
chrII:714095-714472	CELE1	NA	NA	NA	NA	NA	NA	NA	NA	-0.0200549	0.542141	-0.544361	0.623694	0.736802	-1.41696	-0.581706	-0.509224	7.359	15.6526	7.50139	17.3189	19.2051	1.2485	7.34831	8.05787	19.5853	10.1451
chrII:1808439-1808534	CELE1	NA	NA	NA	NA	NA	NA	NA	NA	0	0	-0.0146315	0.4402	0.168923	-0.302693	-0.294044	-0.299342	0	0	6.80069	14.9231	4.85148	0	0	0	9.47442	0
chrII:1892926-1892983	CELE1	NA	NA	NA	NA	NA	NA	NA	NA	-0.325255	-0.320798	0	-0.323651	-0.341653	0.564928	0.639479	0	0	0	0	0	0	19.4469	23.4607	0	0	16.3932
chrII:1893151-1893222	CELE1	NA	NA	NA	NA	NA	NA	NA	NA	-0.217557	0.203652	-0.0380125	-0.216544	-0.231926	-0.0702444	-0.287614	-0.29229	0	21.5773	7.87646	0	0	6.5546	0	0	12.6326	13.2056
chrII:1893360-1893419	CELE1	NA	NA	NA	NA	NA	NA	NA	NA	-0.227376	-0.225246	-0.332577	0.00771989	-0.238359	-0.335765	-0.328349	-0.0220819	0	0	0	12.4928	0	0	0	10.4529	15.1591	15.8467
chrII:1893461-1893545	CELE1	NA	NA	NA	NA	NA	NA	NA	NA	0	0.326125	0.391579	0	0	0	0	0	0	8.43841	6.67182	0	0	0	0	0	0	0
chrII:2592878-2593024	CELE1	NA	NA	NA	NA	NA	NA	NA	NA	-0.325255	-0.320798	NA	-0.323651	-0.341653	NA	NA	NA	0	0	0	0	0	0	0	0	0	6.46805
chrII:2639172-2639512	CELE1	NA	NA	NA	NA	NA	NA	NA	NA	0.431164	0	0.297141	0	0.178002	0.727575	0.353672	0.573672	4.09816	0	1.66306	0	1.48035	4.69165	2.03641	3.54649	0	0
chrII:3459207-3459345	CELE1	NA	NA	NA	NA	NA	NA	NA	NA	NA	NA	0	NA	NA	0	0	0.395186	0	0	0	0	0	0	0	4.18834	0	0
chrII:3926557-3926675	CELE1	NA	NA	NA	NA	NA	NA	NA	NA	-0.0149038	-0.473338	0.655445	-0.227184	0.139409	-0.0464498	0.520966	-0.409095	11.7435	0	20.5037	5.73993	15.9834	5.51251	17.0338	0	7.64323	16.5113
chrII:4049996-4050051	CELE1	NA	NA	NA	NA	NA	NA	NA	NA	0	0.334987	-0.0405809	0	0	-0.341611	-0.334127	-0.33867	0	13.8711	10.1269	0	0	0	0	0	16.2419	0
chrII:4232673-4232949	CELE1	NA	NA	NA	NA	NA	NA	NA	NA	-0.0156967	0.197565	-0.770945	0.310196	0.389635	-0.263569	-0.706941	-1.01874	7.57949	10.7873	6.76114	12.5696	13.874	13.5447	7.31779	4.36589	23.5956	10.4117
chrII:4522046-4522172	CELE1	NA	NA	NA	NA	NA	NA	NA	NA	0.212573	0	0.433332	0.222428	0.288132	0	0	0	5.52793	0	8.93079	5.9021	7.33451	0	0	0	0	0
chrII:4591700-4592057	CELE1	NA	NA	NA	NA	NA	NA	NA	NA	0.260712	0.300092	0.81073	-0.353452	-0.547611	-0.077471	0.901746	0.65235	11.7107	12.3537	8.39957	4.18752	2.8201	1.83237	9.5415	6.88183	2.54063	10.8002
chrII:5179967-5180287	CELE1	0.98709	NA	1	NA	NA	NA	NA	NA	-0.953499	-1.00527	0.504121	-0.736406	-0.586993	-0.207867	0.0869809	0.263949	19.5392	18.2466	27.8361	24.65	28.419	14.6285	19.0318	22.4645	23.063	66.2477
chrII:6110134-6110199	CELE1	NA	NA	NA	NA	NA	NA	NA	NA	0.441298	0	0.580677	0.252055	0	0	0	0	21.1738	0	17.185	11.3571	0	0	0	0	0	0
chrII:6268342-6268460	CELE1	NA	NA	NA	NA	NA	NA	NA	NA	0.463162	0.956062	-0.355998	0	0.49203	0.405963	0.595244	-0.698312	11.7435	30.1372	4.76559	0	12.3978	21.3757	28.7047	0	15.2865	0
chrII:8111645-8111950	CELE1	NA	NA	NA	NA	NA	NA	NA	NA	-0.392875	-0.160058	1.00066	-0.00237401	-0.330975	0.932768	0.624841	0	2.29427	4.88251	8.25393	6.91395	3.04406	7.37203	4.35494	0	0	9.3216
chrII:8696293-8696483	CELE1	NA	NA	NA	NA	NA	NA	NA	NA	-0.908533	-0.160414	0.152442	-0.380275	-0.0935908	-0.70239	-0.676831	-0.345173	0	11.5775	9.35642	7.50061	12.6012	0	0	3.04806	9.74545	20.2432
chrII:8713607-8713915	CELE1	NA	NA	NA	NA	NA	NA	NA	NA	-0.634129	-0.369732	0.841401	-0.631391	-0.0325758	-0.434755	-0.398699	-0.420102	0	2.51386	10.2866	0	6.28181	0	0	0	3.08038	9.53811
chrII:9103402-9103774	CELE1	NA	NA	NA	NA	NA	NA	NA	NA	-0.645586	-0.385775	-0.302941	-0.643913	-0.670139	-0.65412	-0.0209384	-0.311263	0	1.92296	1.75031	0	0	0	3.57269	1.68143	4.9903	7.73199
chrII:9173881-9174216	CELE1	NA	NA	NA	NA	NA	NA	NA	NA	0.550361	0.59452	0.117564	0.205603	0.464865	-0.371896	-0.271356	0.308949	8.338	9.07027	5.31868	4.06578	7.04692	1.40456	2.06671	7.46633	5.6657	2.82977
chrII:9382367-9382758	CELE1	NA	NA	1	NA	NA	NA	NA	NA	-0.557144	-0.509657	0.460084	-0.121518	-0.23586	-0.0810892	-0.846127	-0.68653	7.12996	7.62269	16.7888	12.7064	10.992	9.83595	3.47123	4.68501	14.1374	19.6462
chrII:9418656-9418814	CELE1	NA	NA	NA	NA	NA	NA	NA	NA	0.209892	0.597204	-0.52238	-0.26429	0.078355	-0.325638	-0.0333708	-0.113399	8.74749	19.1674	7.67277	0	6.10403	11.2196	16.7624	14.929	23.4136	5.9799
chrII:9746115-9746235	CELE1	NA	NA	NA	NA	NA	NA	NA	NA	NA	NA	NA	NA	NA	NA	NA	NA	0	0	0	0	0	0	0	0	0	0
chrII:9944450-9944765	CELE1	NA	NA	NA	NA	NA	NA	NA	NA	0.217365	0.244174	-0.780978	-0.283101	0.642665	-1.12945	-0.440239	-0.289529	4.42238	4.728	1.79464	0	9.33759	0	4.39503	5.6694	11.9147	3.10894
chrII:10556054-10556370	CELE1	0.98709	0.620385	1	0.913629	0.652737	0.999728	0.94925	0.547355	-0.434859	-0.822525	0.442329	-0.249967	-0.47811	0.639754	0.238647	0.838107	77.158	55.6182	75.7219	89.127	74.4558	86.7046	64.2988	102.304	70.329	146.364
chrII:10812166-10812255	CELE1	NA	NA	NA	NA	NA	NA	NA	NA	NA	NA	NA	NA	NA	NA	NA	NA	0	0	0	0	0	0	0	0	0	0
chrII:10832048-10832314	CELE1	NA	NA	NA	NA	NA	NA	NA	NA	0.354738	-0.225222	-0.328808	0.35969	0.143144	-0.588607	-0.243449	-0.0921542	10.468	2.68639	4.24798	10.4821	7.26996	2.45689	5.20161	6.70985	10.378	7.24056
chrII:11229338-11229464	CELE1	NA	NA	NA	NA	NA	NA	NA	NA	-0.24701	-0.244826	0	-0.246222	-0.0612126	0	0.281789	0	0	0	0	0	3.97479	0	5.24651	0	0	7.73563
chrII:11231998-11232166	CELE1	NA	NA	NA	NA	NA	NA	NA	NA	-0.254708	-0.250141	0	0.382745	-0.278863	0	0.340394	0.313406	0	0	0	12.5187	0	0	4.10897	3.71108	0	5.62606
chrII:11445434-11445800	CELE1	NA	NA	NA	NA	NA	NA	NA	NA	-0.426283	-0.397828	0	0.155606	-0.052946	0.990191	0.698407	0.638294	1.89489	2.11657	0	7.62594	5.18263	5.64518	3.70769	3.29524	0	7.8584
chrII:11654535-11654830	CELE1	NA	NA	NA	NA	NA	NA	NA	NA	-0.575258	-0.152883	0.633286	-0.35285	-0.208777	0.37524	-0.0126463	-0.0607236	2.37178	7.47065	8.24305	4.83992	6.68965	5.4049	2.25104	1.96682	3.07278	13.276
chrII:11711187-11711315	CELE1	NA	NA	NA	NA	NA	NA	NA	NA	0.597944	0.789647	0.222271	0.236031	0.233354	-0.445193	1.17803	0.454398	21.6662	28.7237	9.45714	11.1056	11.4367	0	36.592	14.2366	7.05073	7.37057
chrII:11911981-11912335	CELE1	0.98709	NA	1	NA	NA	NA	NA	NA	-0.837917	-0.0257587	0.474138	-0.671277	-0.172434	0.0466447	0.246405	0.785956	9.83203	25.9221	19.2633	12.4814	21.8713	12.709	15.3321	25.3596	15.6108	35.3526
chrII:11983582-11983660	CELE1	NA	NA	NA	NA	NA	NA	NA	NA	-0.328891	-0.324434	0	-0.327286	-0.344888	0.223137	0.533255	0	0	0	0	0	0	5.97381	17.5801	0	0	12.4358
chrII:11998476-11998739	CELE1	NA	NA	NA	NA	NA	NA	NA	NA	0	0	0.250407	0	0.261956	0	0.289384	0.254563	0	0	2.14812	0	1.76417	0	2.63036	2.20523	0	0
chrII:12033289-12033405	CELE1	NA	NA	NA	NA	NA	NA	NA	NA	0.248906	0.267771	0	0.462444	0	0.285544	0.892878	0	6.0004	6.63916	0	12.2446	0	5.60674	22.7797	0	0	0
chrII:12186061-12186129	CELE1	NA	NA	1	NA	NA	NA	NA	NA	0.896375	0.0191759	-0.146912	-0.24672	0.796462	-1.0833	-1.19179	-0.506056	81.0129	21.6529	78.9419	9.89929	69.763	25.8538	20.128	53.8846	122.927	28.0178
chrII:12189560-12189676	CELE1	NA	NA	NA	NA	NA	NA	NA	NA	0	0.326125	-0.0143157	0	0	-0.333434	-0.326046	-0.33054	0	6.13047	5.58005	0	0	0	0	0	7.77388	0
chrII:12199968-12200322	CELE1	0.98709	NA	1	NA	NA	NA	NA	NA	0.216831	-0.288943	0.0751034	-0.292991	-0.439785	0.176457	-0.0278055	-0.0361527	25.5409	14.3109	17.1827	14.5928	12.1376	19.0634	15.5696	15.3932	21.0924	27.2286
chrII:12462009-12462348	CELE1	NA	NA	NA	NA	NA	NA	NA	NA	-0.00669806	-0.221148	-0.332822	-0.222901	-0.0610936	-0.33596	-0.00786683	-0.3331	2.06484	0	0	0	1.4847	0	2.0424	0	2.79952	2.88949
chrII:12744170-12744248	CELE1	NA	NA	1	NA	NA	0.999728	NA	NA	-0.467221	-0.179543	-0.439328	-0.461962	-0.353859	0.653885	1.46175	0.297373	53.0686	74.8946	40.235	52.7193	61.4266	115.534	232.35	84.4801	83.8046	123.157
chrII:13034253-13034626	CELE1	NA	NA	NA	NA	NA	NA	NA	NA	-0.420143	-0.174442	-0.0344372	-0.407574	-0.51603	-0.385135	-0.358921	0.216415	1.87713	3.99478	1.74563	2.00419	1.34973	0	0	3.35386	2.54502	7.71132
chrII:13091865-13092223	CELE1	NA	NA	NA	NA	NA	NA	NA	NA	-0.0045456	-0.179986	0.623223	-0.178025	-0.124652	-0.043164	-0.368167	-0.383996	3.91112	1.99795	7.03538	2.08793	2.59466	1.82727	0	0	2.65136	5.29695
chrII:13105157-13105388	CELE1	NA	NA	NA	NA	NA	NA	NA	NA	0.430484	0	0.799636	0.232739	0.475167	-0.11626	0.513893	0.616039	6.02359	0	13.3311	2.94419	6.52757	2.03419	8.97951	10.2315	3.92045	0
chrII:13115068-13115200	CELE1	0.98709	NA	1	NA	NA	0.999728	0.536625	NA	0.773992	0.523047	0.23586	0.42211	0.474114	0.667223	1.07445	1.18011	131.366	105.151	59.945	96.4439	100.694	86.3672	124.463	134.702	62.5021	87.2133
chrII:13261922-13262242	CELE1	NA	NA	1	NA	NA	NA	NA	NA	-0.677654	-0.644592	-0.116328	-0.00134883	-0.867626	0.760221	1.00449	0.0962687	4.3535	4.65435	5.56721	13.3889	2.90182	16.672	20.9323	7.67506	8.63216	17.969
chrII:13262420-13262712	CELE1	NA	NA	1	NA	NA	NA	NA	NA	-1.03994	-0.23485	0.00178094	-0.599927	-0.67125	0.199381	-0.177481	-0.0161168	2.37347	12.8494	16.9476	7.22071	6.49155	20.2303	13.9323	16.5099	22.1628	23.1471
chrII:13271220-13271271	CELE1	NA	NA	NA	NA	NA	NA	NA	NA	NA	NA	0.299482	NA	NA	0	0	0	0	0	10.9059	0	0	0	0	0	0	0
chrII:13271354-13271415	CELE1	NA	NA	NA	NA	NA	NA	NA	NA	NA	NA	0	NA	NA	0.359866	0	0	0	0	0	0	0	7.61179	0	0	0	0
chrII:13667659-13667782	CELE1	NA	NA	NA	NA	NA	NA	NA	NA	0.218798	0.225606	-0.0491287	0.217311	0	-0.347557	-0.340105	-0.344632	5.60827	5.78439	4.57343	5.50848	0	0	0	0	7.6761	0
chrII:13737182-13737362	CELE1	0.98709	NA	1	NA	NA	NA	NA	NA	0.489807	-0.269259	0.200939	0.457847	-0.167508	0.350347	1.42836	0.98521	69.5242	33.0176	19.7467	67.8288	37.3189	22.8926	64.1342	43.0569	20.3341	58.8319
chrII:14114620-14114735	CELE1	NA	NA	NA	NA	NA	NA	NA	NA	NA	NA	0	NA	NA	0	0	0.395186	0	0	0	0	0	0	0	5.01879	0	0
chrII:14123741-14123860	CELE1	NA	NA	NA	NA	NA	NA	NA	NA	-0.00476525	0.00451259	0	-0.00536413	0.0702319	0	0	0	5.79521	5.97721	0	5.69209	7.76236	0	0	0	0	7.92336
chrII:14172420-14172640	CELE1	NA	NA	NA	NA	NA	NA	NA	NA	0.626151	0.463943	0.767855	0.25749	0.154531	-0.184888	-0.314191	-0.091512	9.47013	6.49108	18.7387	3.3917	2.10743	4.27087	3.14215	5.47218	8.61391	0
chrII:14219903-14220222	CELE1	NA	NA	NA	NA	NA	NA	NA	NA	0.535024	0.405218	0.741654	-0.259591	0.366584	1.25261	0.61638	1.10126	8.7342	6.91035	5.31661	0	6.30998	11.7246	4.34009	9.37776	0	3.07008
chrII:14221903-14222170	CELE1	NA	NA	NA	NA	NA	NA	NA	NA	0.501108	-0.235845	0.0438992	0.183838	0.345505	-0.168776	-0.466329	-0.102801	10.4289	0	10.9003	5.0974	7.53431	8.41731	5.1822	9.19289	13.8909	3.66577
chrII:14266252-14266436	CELE1	NA	NA	NA	NA	NA	NA	NA	NA	-0.405282	-0.401698	-0.0262525	-0.188618	-0.244388	-0.0300567	-0.00864576	-0.329457	0	0	3.529	3.69217	2.72864	3.54589	3.7536	0	5.14506	10.279
chrII:14284174-14284508	CELE1	NA	NA	NA	NA	NA	NA	NA	NA	0.431164	0	-0.338335	0	0.178002	0.27977	-0.0171714	-0.0515767	4.17156	0	0	0	1.50686	4.22625	1.98897	1.73785	2.8413	0
chrII:14311094-14311386	CELE1	NA	NA	NA	NA	NA	NA	NA	NA	-0.209741	-0.197982	0.13751	-0.196657	0.0237839	-0.174553	-0.0243958	0.333912	2.37347	2.448	6.09924	2.55825	5.03529	3.22137	4.6441	8.25496	6.49718	6.49013
chrII:14313217-14313556	CELE1	0.98709	NA	1	NA	NA	0.472922	NA	NA	-0.172248	-0.555204	0.454152	-0.690101	-1.27704	1.52783	1.40876	-0.322921	28.7715	19.5116	19.3565	17.05	8.67846	48.1371	44.106	8.82613	16.4239	45.4877
chrII:14313732-14314024	CELE1	NA	NA	1	NA	NA	NA	NA	NA	-0.018333	0.45019	-0.486593	-0.169515	0.486346	0.24753	-1.06758	0.045628	9.51647	17.9485	14.4267	7.44773	18.285	29.5401	6.91818	24.6113	31.1868	13.0882
chrII:14322120-14322202	CELE1	NA	NA	NA	NA	NA	NA	NA	NA	-0.00750442	0.193251	0.531922	-0.43436	-0.118087	0.466736	0.997253	0.303565	16.7572	27.3594	13.6652	0	12.1638	11.3718	32.4498	7.55629	0	22.9109
chrII:14469666-14469815	CELE1	NA	NA	NA	NA	NA	NA	NA	NA	-0.229369	0.00277084	0	-0.228597	-0.240408	0	0	0	0	4.78177	0	0	0	0	0	0	0	6.33869
chrII:14494688-14494874	CELE1	0.271346	NA	NA	NA	NA	NA	NA	NA	-1.88392	-0.12058	-0.121183	-1.01916	-1.86486	-0.377424	-0.551831	0.987617	11.192	79.8956	9.09794	34.2969	13.0796	6.03166	3.56314	36.4113	14.8178	118.635
chrII:14881295-14881552	CELE1	NA	NA	NA	NA	NA	NA	NA	NA	-0.657524	0.428084	-0.0813445	0.306729	0.269476	0.126155	-0.0190864	0.517127	0	16.6806	4.72857	14.2687	13.0906	6.91438	5.27411	11.4569	7.21465	11.301
chrII:15102538-15102930	CELE1	0.98709	NA	1	NA	NA	NA	NA	NA	-0.228805	-0.298069	0.418296	0.0879004	0.0155193	1.31132	0.165421	1.06134	14.2405	12.9272	9.53098	20.3032	18.6708	23.4285	6.85327	18.3489	7.26593	24.7567
chrII:15110613-15110785	CELE1	NA	NA	NA	NA	NA	NA	NA	NA	-0.0141619	0.0244022	0.797863	-0.373782	-0.740115	0.981185	0.873335	1.17277	16.1558	17.2722	10.3299	7.89655	2.69215	14.1035	11.7169	17.8663	0	22.1667
chrII:15111873-15112029	CELE1	NA	NA	NA	NA	NA	NA	NA	NA	-0.387115	1.01045	0.100948	0.388093	0.552435	-0.222377	0.355314	0.272108	8.9011	62.045	15.541	30.8782	37.5882	9.01779	21.399	19.4005	17.6492	24.8285
chrII:15213262-15213398	CELE1	NA	NA	1	NA	NA	NA	NA	NA	-0.0180359	-0.106905	0.154079	-0.277452	0.458169	-0.12551	-0.151152	-0.279935	30.6016	27.0464	53.4294	21.3996	52.419	41.165	39.7291	34.6527	60.9859	41.8718
chrII:15229773-15229944	CELE1	NA	NA	NA	NA	NA	NA	NA	NA	-0.420201	-0.17538	-0.260103	-0.192474	-0.197239	-0.562897	-1.02579	-0.722889	4.08167	8.68632	10.8886	8.32917	8.1234	5.48757	0	3.64635	22.1357	16.9515
chrII:15245964-15246188	CELE1	NA	NA	NA	NA	NA	NA	NA	NA	-0.577327	-0.551638	-0.103722	-0.351883	-0.507385	-1.05143	-0.278433	-0.10378	3.09078	3.45237	7.94256	6.36719	4.13993	0	6.04765	7.96236	12.5032	17.3248
chrII:40831-41219	CELE1	0.98709	NA	1	NA	NA	NA	NA	NA	-0.567566	-0.651094	0.212602	0.167257	-0.995067	0.310581	0.467019	0.708089	10.7604	9.67834	9.40852	24.0238	6.28761	10.8581	12.2791	15.5444	9.57008	27.2116
chrII:153319-153601	CELE1	NA	NA	1	NA	NA	NA	NA	NA	-0.197329	0.313506	-0.128059	-0.186795	0.895323	-0.11436	-1.23423	0.175921	7.4188	15.6276	15.2395	7.47586	29.2195	15.292	2.45376	20.7307	23.2448	13.7741
chrII:405750-406049	CELE1	NA	NA	NA	NA	NA	NA	NA	NA	-0.237393	-0.211877	-0.324347	0.186022	0.0144114	-0.309035	-0.00748365	-0.320613	2.34016	2.58927	1.89035	7.05223	4.9178	2.18663	4.53574	1.9406	6.06363	6.4441
chrII:2038283-2038420	CELE1	NA	NA	NA	NA	NA	NA	NA	NA	-0.25631	0.0112493	0.597879	-0.010156	0.0857416	0.561141	0.357793	0.330689	0	5.62886	8.84037	4.94965	7.0329	8.17333	4.82831	4.54472	0	7.11902
chrII:2513133-2513219	CELE1	NA	NA	NA	NA	NA	NA	NA	NA	-0.516973	0.208533	-0.281652	-0.239879	0.0121551	-0.284675	-0.277547	0.187688	0	25.4174	0	7.85116	16.509	0	0	14.4177	10.4545	22.221
chrII:3806043-3806348	CELE1	NA	NA	NA	NA	NA	NA	NA	NA	-0.154502	-0.435894	0.449033	-0.898929	-0.529377	0.752528	-0.382943	-0.0548462	11.4497	7.42101	6.12038	2.23219	6.3434	9.51578	0	2.04958	3.11058	18.9532
chrII:4040634-4040809	CELE1	NA	NA	NA	NA	NA	NA	NA	NA	-0.226508	0.00391691	0.255584	0.00741131	0.0725353	0.4103	0	0	0	4.07537	3.22219	4.2589	5.29252	5.36285	0	0	0	5.40229
chrII:4047673-4047993	CELE1	NA	NA	NA	NA	NA	NA	NA	NA	-0.00872085	-0.225585	0	-0.00969536	0.0848858	0	0	0	2.16644	0	0	2.12789	3.14516	0	0	0	0	3.06051
chrII:4468775-4468901	CELE1	NA	NA	NA	NA	NA	NA	NA	NA	-0.424984	-0.177299	0.566285	-0.205964	-0.182566	0.947102	0	0.573196	5.52793	11.7641	8.93079	10.7567	11.6168	17.7625	0	9.16818	0	22.9579
chrII:6585613-6585952	CELE1	0.652252	NA	NA	NA	NA	NA	NA	NA	-1.50188	-0.676028	0.802803	-1.08579	-1.0979	0.485841	0.669107	-0.120477	10.2658	26.0154	15.7683	17.2456	17.0123	11.3403	13.8834	5.26921	8.27417	65.4351
chrII:6903408-6903568	CELE1	NA	NA	NA	NA	NA	NA	NA	NA	-0.720218	-0.488146	-0.313592	-0.974498	-0.479602	-0.993528	-0.260021	-0.598831	4.31941	8.91012	7.57746	0	9.16359	0	8.45169	3.89548	17.2107	30.3137
chrII:7471707-7472050	CELE1	NA	NA	NA	NA	NA	NA	NA	NA	0.376333	0.214609	0.219589	-0.0057077	-0.0915771	0.42466	0.913628	0.446414	6.08401	4.17014	3.54643	1.98561	1.46744	5.18578	10.0115	5.20794	2.76697	2.76396
chrII:7785724-7786084	CELE1	NA	NA	NA	NA	NA	NA	NA	NA	-0.456939	-0.258113	-0.283096	-1.11453	-0.378308	-0.162251	-0.725051	-0.613945	5.83418	8.27727	9.9007	0	6.6671	11.7003	5.61504	6.57538	18.2224	16.2408
chrII:7941904-7942223	CELE1	NA	NA	1	NA	NA	NA	NA	NA	-0.362135	-0.614708	-0.258084	-1.00829	-0.413287	-0.706637	-0.518764	-0.284388	13.122	9.1518	11.7052	4.47693	12.2538	6.47432	8.32883	11.1971	20.4249	27.0378
chrII:8015202-8015364	CELE1	NA	NA	NA	NA	NA	NA	NA	NA	-1.00306	-0.375273	0.899292	-1.31516	-1.14406	0.394771	0.703193	1.06315	21.4133	45.0994	20.875	12.9796	18.3419	10.9442	16.696	25.8297	5.83949	88.6612
chrII:9274359-9274696	CELE1	0.98709	NA	1	NA	NA	0.999728	NA	NA	-0.386972	0.445625	0.17129	-0.0016656	0.366575	-0.666374	-0.403993	-0.255471	18.6544	41.7283	33.4011	27.6487	38.5908	15.5961	20.2953	23.1902	38.4242	37.0371
chrII:9365108-9365254	CELE1	0.98709	NA	1	NA	NA	NA	NA	NA	-0.195216	-0.586747	0.746126	-1.07147	-0.358163	0.192398	0.765723	0.84558	47.6232	30.0859	36.4709	14.8448	39.6139	19.8084	37.7913	40.5223	19.1375	78.2619
chrII:9391157-9391456	CELE1	NA	NA	NA	NA	NA	NA	NA	NA	0.226568	0.233106	1.29217	0.236926	0.164733	0.250009	0.343078	0.313175	2.34016	2.39088	12.7714	2.49855	1.68266	1.5731	2.22102	2.09057	0	0
chrII:9668671-9668992	CELE1	NA	NA	NA	NA	NA	NA	NA	NA	-0.246988	0.918369	-0.0416932	-0.245525	-0.368737	-0.418734	0.500983	0.213677	2.18027	18.3748	2.02753	2.12128	1.5677	0	6.38241	3.75575	2.95602	6.00382
chrII:10170260-10170520	CELE1	NA	NA	NA	NA	NA	NA	NA	NA	0.622393	0	0.283264	0	0.171463	0	0	0	8.04414	0	2.17282	0	1.78445	0	0	0	0	0
chrII:10594355-10594422	CELE1	NA	NA	NA	NA	NA	NA	NA	NA	NA	NA	NA	NA	NA	NA	NA	NA	0	0	0	0	0	0	0	0	0	0
chrII:10594427-10594565	CELE1	NA	NA	NA	NA	NA	NA	NA	NA	0.183346	-0.50844	0.307471	-0.514956	0.0182692	0	0	0	15.1045	0	4.07989	0	10.333	0	0	0	0	13.9081
chrII:10654652-10654920	CELE1	NA	NA	NA	NA	NA	NA	NA	NA	0.346176	0.793134	-0.296849	0.362162	0.244018	-0.397846	-0.179275	-0.661576	10.3655	19.3286	8.43279	10.6514	8.8021	7.01756	10.3259	4.49573	17.3777	7.06917
chrII:10812717-10812794	CELE1	NA	NA	NA	NA	NA	NA	NA	NA	-0.325255	-0.320798	0.391579	-0.323651	-0.341653	0	0	0	0	0	7.27058	0	0	0	0	0	0	12.1898
chrII:11099468-11099794	CELE1	NA	NA	NA	NA	NA	NA	NA	NA	0.593377	0.190044	-0.28373	0.00817622	0.238428	0.195287	-0.617759	0.293974	12.8209	6.58041	7.19933	4.5845	7.24087	13.2343	4.07527	14.9309	13.9074	5.91201
chrII:11179175-11179263	CELE1	NA	NA	NA	NA	NA	NA	NA	NA	0	0	NA	0	0.271038	NA	NA	NA	0	0	0	0	5.67189	0	0	0	0	0
chrII:11297090-11297215	CELE1	NA	NA	NA	NA	NA	NA	NA	NA	0	0.203575	0.309802	0	0.287901	0	0.32482	0	0	5.69258	5.18148	0	8.01267	0	5.51123	0	0	0
chrII:11867582-11867922	CELE1	0.98709	NA	1	NA	NA	NA	NA	NA	-0.433859	0.0413223	0.0341277	-0.41507	-0.139716	-0.571472	-0.213876	0.953527	14.3144	24.1848	10.7329	14.6068	19.9231	5.2314	7.98077	26.2688	13.5845	30.9493
chrII:11989439-11989539	CELE1	NA	NA	NA	NA	NA	NA	NA	NA	-0.389024	-0.173307	0.467011	-0.190008	-0.478116	-0.102023	-0.379902	0.458419	6.95096	14.2033	18.5429	13.5258	4.998	4.67259	0	18.1834	9.00539	28.8679
chrII:12032414-12032702	CELE1	NA	NA	NA	NA	NA	NA	NA	NA	0.158471	-0.181699	-0.109171	0.00317852	0.19608	0.120369	-0.477714	-0.114687	9.67109	5.16971	8.44271	7.55081	10.0748	11.0716	4.80564	8.36921	12.8815	9.97935
chrII:12040442-12040749	CELE1	0.98709	NA	1	NA	NA	0.999728	NA	NA	-0.0347915	0.610567	0.896404	0.414684	0.125318	0.493188	-0.359877	0.931026	34.0401	59.9587	32.415	50.733	39.579	23.1676	8.83585	33.8862	17.8557	47.2294
chrII:12054978-12055307	CELE1	0.98709	0.992938	1	0.945196	0.977247	0.999728	0.855172	NA	-0.663249	0.0378143	-0.481086	-0.182373	0.0385016	0.29669	0.482808	0.426594	50.8974	90.0072	24.4196	75.4682	90.1157	46.1779	53.8597	51.4422	48.1369	117.549
chrII:12116580-12116729	CELE1	NA	NA	NA	NA	NA	NA	NA	NA	-0.436175	-0.417774	0.684792	-1.06695	-0.358631	-0.391515	-0.57208	-0.0913504	14.0409	14.3453	32.5326	0	16.0455	7.51947	4.44204	12.5434	18.7548	38.8754
chrII:12147894-12148034	CELE1	0.73928	0.956165	1	0.648588	0.531827	0.999728	0.994233	0.979235	0.842867	0.286144	0.53874	0.513253	0.493077	-0.147279	-0.0279143	-0.113174	435.856	287.36	428.964	341.081	334.787	261.371	282.995	266.843	382.837	309.279
chrII:12163483-12163791	CELE1	NA	NA	NA	NA	NA	NA	NA	NA	0.292799	0.605801	0.10946	0.152055	0.165607	0.971575	0.417106	0.504005	11.3386	17.4044	5.50587	9.05735	9.42272	17.3195	8.89823	10.0028	6.02389	9.43577
chrII:12166815-12166950	CELE1	NA	NA	NA	NA	NA	NA	NA	NA	0	0.234941	0.335977	0.395484	0.159348	-0.322712	-0.307695	0.167428	0	5.71163	12.5097	10.0449	3.71175	0	0	8.56147	6.9988	0
chrII:12167139-12167423	CELE1	NA	NA	1	NA	NA	NA	NA	NA	-0.0175968	0.312191	0.117822	-0.168108	0.219901	-0.671918	-0.966506	-0.027295	9.78359	15.518	19.4132	7.65678	13.6216	7.91523	4.77446	16.4998	22.7849	13.4556
chrII:12187060-12187410	CELE1	0.98709	NA	1	NA	NA	0.999728	NA	NA	-0.357045	-1.20768	0.232823	-1.2572	-0.935945	-0.137123	-0.754175	0.229056	35.8704	15.1523	29.4213	14.1906	20.4599	20.921	11.55	29.3504	31.8185	66.5437
chrII:12187899-12188233	CELE1	NA	NA	1	NA	NA	NA	NA	NA	-0.92877	-1.35718	0.749396	-1.20979	-0.988696	0.0700214	-0.030415	0.850475	12.5147	6.42327	22.5191	8.35439	11.7051	11.5095	10.1966	25.0014	13.954	46.0723
chrII:12713090-12713206	CELE1	NA	NA	NA	NA	NA	NA	NA	NA	-0.276716	0.420598	-0.0612184	-0.273732	0.241674	0.039056	0.403081	-0.64964	0	18.9001	10.4271	0	12.2759	12.1008	23.5004	0	15.5478	8.3968
chrII:12785615-12785938	CELE1	NA	NA	NA	NA	NA	NA	NA	NA	-0.234478	0.0142439	-0.0462483	-0.0138556	-0.150988	0.119276	-0.318378	-0.029008	2.16681	4.61126	1.75032	4.21637	2.99549	2.91316	0	1.93572	2.80723	5.96675
chrII:12794424-12794776	CELE1	0.98709	NA	1	NA	NA	NA	NA	NA	-0.877969	-0.561518	-0.029305	0.135451	-0.938014	0.0150717	0.572141	0.544129	9.88774	14.5606	11.4887	30.1554	9.45696	12.2596	21.2409	20.683	15.9389	35.6425
chrII:12902495-12902835	CELE1	NA	NA	1	NA	NA	NA	NA	NA	-0.213939	0.00895231	0.0657572	0.323896	0.263744	-0.187391	-0.237006	1.32372	2.03937	4.20683	9.06982	8.20739	7.2872	6.61537	5.94436	32.4461	10.9172	5.57656
chrII:13104813-13105079	CELE1	NA	NA	NA	NA	NA	NA	NA	NA	0.539177	0.217444	0.862096	0.38197	0.416499	1.22019	0.676507	0.852923	7.88817	2.68639	7.01437	5.11649	5.67189	11.5951	5.09634	6.87836	0	0
chrII:13105512-13105820	CELE1	NA	NA	NA	NA	NA	NA	NA	NA	1.14662	0.909231	0.63426	0.883971	1.0075	0.205583	0.256657	0.407895	13.5677	9.86282	8.45134	9.48786	11.0564	4.24588	4.40363	5.79784	3.08038	0
chrII:13160971-13161134	CELE1	NA	NA	NA	NA	NA	NA	NA	NA	-0.192335	0.319389	1.45892	0.398626	0.271383	0.808267	1.40346	0.793639	8.56155	22.5937	26.2974	24.9897	20.8318	11.9998	24.7199	10.924	0	17.5856
chrII:13161541-13161687	CELE1	NA	NA	1	NA	NA	NA	NA	NA	-0.120379	-0.0765071	-0.120262	-0.437441	-1.17193	0.561907	0.278701	0.60193	42.8473	44.7239	20.4561	29.6896	10.0363	44.0792	32.4937	45.0948	30.9369	65.541
chrII:13202159-13202532	CELE1	NA	NA	NA	NA	NA	NA	NA	NA	-0.0190264	-0.869392	0.451098	-0.00918347	-0.392085	0.126176	0.736026	0.450889	11.2097	1.91782	4.77828	11.3137	6.64421	2.5237	7.27659	4.79019	2.43194	15.4226
chrII:13336515-13336621	CELE1	NA	NA	NA	NA	NA	NA	NA	NA	0.446781	0.252548	-0.323864	0.44311	0.167856	-0.339936	-0.538229	-0.581792	13.0605	6.70341	10.6001	12.7673	4.71774	10.5413	6.22716	5.44093	26.2918	0
chrII:13522257-13522375	CELE1	NA	NA	NA	NA	NA	NA	NA	NA	-0.255794	0.3822	0.167181	0.203017	-0.291614	-0.0731638	-0.293183	-0.299338	0	18.0823	9.53118	12.0388	0	3.96581	0	0	7.64323	8.25567
chrII:14267208-14267536	CELE1	NA	NA	NA	NA	NA	NA	NA	NA	0.348639	0.20959	-0.302555	-0.0138305	-0.172228	-0.639309	-0.0285593	0.27882	8.5154	6.72131	1.98439	4.15229	2.94997	0	4.0505	7.07817	5.78624	5.87607
chrII:14267537-14267827	CELE1	NA	NA	NA	NA	NA	NA	NA	NA	-0.679298	0.00961034	0.119501	-0.675899	-0.317753	-0.122053	0.222977	-0.0805897	0	7.59901	5.84644	0	3.46941	3.87601	7.15892	4.15585	6.3965	10.0194
chrII:14343802-14344170	CELE1	NA	NA	1	NA	NA	NA	NA	NA	0.381653	0.564668	0.259065	0.51335	0.091419	-0.355622	-0.19129	-0.00178591	13.2282	16.6795	14.9939	15.5297	9.15274	7.89114	9.25707	11.4098	15.1332	10.4782
chrII:14346610-14347007	CELE1	0.98709	0.964304	1	0.40509	0.739887	0.999728	0.994233	0.226783	0.156161	-0.146511	-0.538969	0.413944	-0.18176	-0.128138	-0.0339473	-0.687413	454.73	365.937	294.097	546.295	357.786	393.412	422.248	265.034	572.912	546.095
chrII:14712772-14712921	CELE1	NA	NA	NA	NA	NA	NA	NA	NA	0	0.294508	0.415334	1.25201	0.167593	0.118315	-0.369641	0.415757	0	5.17855	11.9138	32.7626	3.10494	6.29242	0	11.9435	6.34558	0
chrII:14719842-14719991	CELE1	NA	NA	NA	NA	NA	NA	NA	NA	-0.00968227	-0.2493	0.835537	0.00289289	0.225152	0.400148	0.288558	-0.438518	4.63617	0	20.047	4.99711	9.57521	10.6657	9.07148	0	6.34558	6.5495
chrII:14731924-14732233	CELE1	NA	NA	NA	NA	NA	NA	NA	NA	-0.391939	-0.368635	0.435525	0.0146295	-0.686786	0.215292	-0.022782	0.799545	2.24331	2.50575	5.76476	7.25387	0	4.23219	2.14938	9.68027	3.07044	9.30333
chrII:15074986-15075260	CELE1	NA	NA	1	NA	NA	NA	NA	NA	0.386765	0.553355	0.034863	0.523789	0.687612	0.390438	0.397936	-0.508498	17.8462	21.7316	13.3088	21.0799	24.9887	19.169	19.6901	6.51466	16.8447	14.0598
chrIII:648926-649287	CELE1	0.98709	NA	1	NA	NA	NA	NA	NA	-0.349856	-0.289106	-0.299338	-0.206077	-0.196852	-0.202022	-0.176232	-0.0265697	13.5023	14.5274	9.63644	16.0138	16.0863	11.1595	11.1991	13.1144	17.9384	26.7021
chrIII:893049-893190	CELE1	NA	NA	NA	NA	NA	NA	NA	NA	0.150113	0.0135977	0.232951	0.155238	-0.391029	-0.367364	-0.016058	0.404794	19.6827	15.5726	19.9685	19.7093	6.55974	7.9431	14.4728	25.2328	19.5136	20.5328
chrIII:1063248-1063502	CELE1	NA	NA	NA	NA	NA	NA	NA	NA	0.41042	0.978314	0.386044	0.222105	0.945586	0.296953	0.490133	0.600467	5.45432	16.8768	6.67182	2.67863	15.6837	5.55213	8.16959	9.66155	3.56684	0
chrIII:1715715-1716057	CELE1	NA	NA	NA	NA	NA	NA	NA	NA	-0.503307	-0.49537	0.248768	-0.500447	0.398133	0.270988	0	0.265637	0	0	1.65337	0	8.37482	1.9125	0	1.82849	0	5.63623
chrIII:2490188-2490397	CELE1	NA	NA	NA	NA	NA	NA	NA	NA	0.159237	-0.195667	-0.382698	-0.00619462	0.0128384	-0.178753	0.432768	-0.380225	9.96618	3.69896	2.7005	6.82199	7.21141	4.49458	12.9593	2.77228	8.86372	9.35643
chrIII:2565499-2565840	CELE1	NA	NA	NA	NA	NA	NA	NA	NA	-0.0129302	-0.445326	-0.0232075	-0.450438	0.249045	-0.345332	-0.00908491	-0.0444641	4.10554	0	1.90896	0	7.03749	0	1.94826	1.70228	2.65949	5.74518
chrIII:2680017-2680079	CELE1	NA	NA	NA	NA	NA	NA	NA	NA	0	0	0.725307	0.242853	0.732164	0	0	0	0	0	27.005	10.8421	38.8235	0	0	0	0	0
chrIII:2689104-2689472	CELE1	NA	NA	NA	NA	NA	NA	NA	NA	-0.0168964	-0.153655	0.638677	0.524433	-0.115205	0.356487	0.688192	0.793095	7.57438	5.99271	6.84472	15.3495	6.6284	4.33564	7.22283	8.37633	2.46489	10.3925
chrIII:2713254-2713304	CELE1	NA	NA	NA	NA	NA	NA	NA	NA	-0.00721452	0.186855	NA	-0.229095	-0.251001	NA	NA	NA	13.7656	28.128	0	0	0	0	0	0	0	19.2632
chrIII:2716755-2717049	CELE1	NA	NA	NA	NA	NA	NA	NA	NA	-0.684676	-0.677954	0.575901	-0.682253	-0.163378	0	0.877688	0.314978	0	0	3.84478	0	4.86875	0	6.87128	1.97349	0	9.88357
chrIII:2735113-2735467	CELE1	0.98709	NA	1	NA	NA	0.999728	NA	NA	1.07213	0.2699	1.00042	-0.144842	0.644423	0.708517	0.807827	0.790209	37.4438	16.8343	18.297	10.1825	24.7153	14.0383	15.4113	15.013	7.92456	16.5153
chrIII:3006270-3006706	CELE1	NA	NA	1	NA	NA	NA	NA	NA	0.407004	0.0270708	-0.0634242	-0.144711	0.101499	-0.255246	0.365332	-0.0265486	15.9591	10.1204	12.072	7.96744	11.194	9.90303	18.8756	12.8136	17.3282	13.1269
chrIII:3043338-3043463	CELE1	NA	NA	NA	NA	NA	NA	NA	NA	-0.232476	-0.00177455	NA	-0.231706	-0.243475	NA	NA	NA	0	5.69258	0	0	0	0	0	0	0	7.79702
chrIII:3290712-3290762	CELE1	NA	NA	NA	NA	NA	NA	NA	NA	-0.618645	-0.356853	-0.29511	-0.616442	-0.287334	0.111967	-0.289584	-0.0352013	0	15.231	0	0	19.0302	18.5071	0	11.4153	17.8342	55.9296
chrIII:3428645-3429028	CELE1	NA	NA	NA	NA	NA	NA	NA	NA	0.149205	-0.184522	0.636002	-0.0059544	-0.128581	0.595049	0.381198	0	5.43301	2.02287	3.17701	3.73077	2.62916	2.93729	1.73517	0	0	5.1168
chrIII:3617346-3617652	CELE1	NA	NA	NA	NA	NA	NA	NA	NA	-0.676983	-0.448096	0.9932	-0.47276	-0.401873	0.685435	0.636463	1.14811	4.55203	7.20297	7.94769	6.89143	7.83981	4.61171	4.43232	9.77486	0	19.0975
chrIII:3655988-3656245	CELE1	NA	NA	NA	NA	NA	NA	NA	NA	0.133887	0.552836	1.14357	-0.00403574	-0.424398	0.766637	0.291542	0.66769	13.5286	22.7021	16.3838	11.1056	5.56698	10.5728	5.27411	9.37482	3.52536	14.9863
chrIII:3802343-3802496	CELE1	NA	NA	1	NA	NA	NA	NA	NA	0.4146	0.0202242	0.269896	-0.291911	0.00172074	-0.226217	0.723058	0.686919	45.3725	28.7183	30.5738	19.0373	28.2331	17.7128	48.5059	46.5333	30.3545	37.8656
chrIII:3870433-3870557	CELE1	NA	NA	NA	NA	NA	NA	NA	NA	0.139818	0.193444	0.11531	-0.197248	0.176977	-1.06061	0.382431	-0.346383	22.3596	24.857	19.5195	10.9288	23.6054	0	27.3269	9.67481	22.1674	23.3252
chrIII:4096585-4096650	CELE1	NA	NA	NA	NA	NA	NA	NA	NA	-0.395147	-0.169582	0.239251	-0.640201	-0.67887	0	0	0	10.6371	22.6371	8.5925	0	0	0	0	0	0	44.6557
chrIII:4350365-4350714	CELE1	NA	NA	NA	NA	NA	NA	NA	NA	0	0	0	0	0.396367	0	0	0.736958	0	0	0	0	2.88456	0	0	5.11866	0	0
chrIII:5344706-5345005	CELE1	NA	NA	NA	NA	NA	NA	NA	NA	-0.00885202	-0.352898	-0.340619	-0.591718	-0.0237576	-0.984593	-0.56078	-0.0971247	6.95426	2.39088	3.7807	0	6.60046	0	2.22102	5.97177	9.37739	9.50803
chrIII:5455969-5456052	CELE1	NA	NA	NA	NA	NA	NA	NA	NA	0.846466	-0.203692	0.373941	-0.217729	0.00426664	-0.429153	-0.474703	-0.838815	66.6251	9.24741	52.3636	8.92341	17.5636	16.8547	16.1991	6.93071	44.3186	22.6382
chrIII:5534291-5534647	CELE1	NA	NA	NA	NA	NA	NA	NA	NA	0.440346	0	-0.0238389	0	0	-0.376407	-0.353606	0.420955	3.93304	0	1.82876	0	0	0	0	5.01829	2.54774	0
chrIII:5682924-5683282	CELE1	0.98709	NA	1	NA	NA	NA	NA	NA	-0.715037	-0.233607	1.64464	-0.974241	-0.160719	0.995098	0.905963	1.7374	11.678	20.3111	20.1506	8.16643	21.954	10.2274	9.35833	22.0843	2.65136	34.9587
chrIII:5717628-5717973	CELE1	NA	NA	NA	NA	NA	NA	NA	NA	-0.590939	0.00757014	0.205423	-0.151596	-0.29136	-0.399683	-0.370192	0.224757	0	6.21906	3.27806	4.33275	2.80503	0	0	3.49524	2.62874	8.24396
chrIII:6703279-6703427	CELE1	NA	NA	NA	NA	NA	NA	NA	NA	-0.0906093	-0.186828	1.0241	-0.187594	0.128045	0.310406	0.362562	0.576072	4.66729	0	16.951	0	16.9395	4.40261	4.6605	7.81449	0	12.7625
chrIII:8428628-8428746	CELE1	NA	NA	NA	NA	NA	NA	NA	NA	0	0.387329	0	0	0.155142	0	0	0.395186	0	12.0549	0	0	4.242	0	0	4.89227	0	0
chrIII:9233633-9233827	CELE1	NA	NA	NA	NA	NA	NA	NA	NA	-0.0117406	-0.543902	-0.532023	-0.559939	0.304904	-0.12843	-0.818253	-0.284153	14.401	3.67828	2.90823	3.50283	22.4972	8.20437	0	5.97107	13.993	19.6658
chrIII:9836884-9836943	CELE1	NA	NA	NA	NA	NA	NA	NA	NA	0.842273	0.504826	1.39055	0.495971	1.00327	1.78186	1.32171	1.0342	46.5824	23.9088	60.9985	23.877	57.5913	90.9257	56.4625	39.5618	0	0
chrIII:9845912-9846212	CELE1	NA	NA	NA	NA	NA	NA	NA	NA	NA	NA	0	NA	NA	0.270863	0	0.325537	0	0	0	0	0	1.56788	0	2.08363	0	0
chrIII:9907105-9907233	CELE1	NA	NA	NA	NA	NA	NA	NA	NA	-0.868197	0.0205463	0.795098	-0.352787	-0.225711	0.629409	0.202138	-0.0977442	0	23.1635	34.762	11.6212	14.7444	29.0843	15.7134	9.37482	14.7572	29.9725
chrIII:10111388-10111717	CELE1	NA	NA	NA	NA	NA	NA	NA	NA	-0.383894	0.178771	-0.0764636	-0.179434	-0.102697	0.358467	0.498197	0.755443	4.2147	11.4087	1.7185	6.41112	7.41175	4.84803	6.22769	8.8209	2.88435	11.7165
chrIII:10127978-10128351	CELE1	0.992885	NA	1	NA	NA	0.999728	0.994585	NA	0.00785726	-0.87233	-0.40646	-0.528985	-0.552628	0.250921	0.0304948	0.338838	52.3118	23.4913	22.6044	33.0041	32.1768	39.6979	32.8198	42.1566	42.2476	69.8246
chrIII:10133536-10133876	CELE1	NA	NA	1	NA	NA	NA	NA	NA	0.299914	0.202344	0.868944	0.676341	0.699527	0.362782	-0.429206	0.872365	10.2745	8.93728	24.5404	16.6098	16.7333	15.6942	5.94436	24.6935	13.7085	8.45757
chrIII:10212116-10212228	CELE1	NA	NA	NA	NA	NA	NA	NA	NA	0	1.02277	0.497186	0.688805	0.773212	0.0233825	0.214842	-0.0912366	0	32.2641	26.611	18.7227	20.9537	12.5291	18.1871	10.7022	16.8467	0
chrIII:10276813-10277144	CELE1	NA	NA	NA	NA	NA	NA	NA	NA	-0.360301	-0.142586	-0.0861726	-0.00613166	-0.0960286	-0.373313	0.406896	0.121142	4.20926	6.66058	3.67461	8.42988	7.24946	1.97587	8.19712	5.26066	5.73396	11.4555
chrIII:10279459-10279572	CELE1	NA	NA	NA	NA	NA	NA	NA	NA	0.955169	0	1.1749	0.258524	0	0.256087	0	0.827287	30.5592	0	27.1299	5.99168	0	4.13975	0	16.5045	0	0
chrIII:10336481-10336756	CELE1	NA	NA	NA	NA	NA	NA	NA	NA	-0.0291765	-0.421564	0.607304	-0.473094	-0.332157	0.26008	0.603774	-0.325704	22.7489	14.0721	17.37	12.8561	15.7533	11.8839	17.5101	4.21869	10.1928	31.6919
chrIII:10339347-10339657	CELE1	3.12928e-05	NA	NA	NA	NA	NA	NA	NA	-3.54866	-0.902052	0.637316	-3.53551	-3.58707	0.331522	-0.375486	0.791635	2.25739	62.2608	7.84547	2.19631	3.24629	4.55239	0	9.64914	2.92458	170.487
chrIII:10358182-10358522	CELE1	NA	NA	NA	NA	NA	NA	NA	NA	0	0	-0.444306	0.329288	0	-0.450092	-0.434691	-0.444906	0	0	0	2.19814	0	0	0	0	2.79131	0
chrIII:10403474-10403816	CELE1	0.98709	NA	1	NA	NA	0.999728	0.960585	NA	0.0334032	-0.503861	-0.298988	0.560607	0.0277228	-0.68344	-0.233173	-0.518317	36.7456	21.9526	45.0847	58.0863	36.4427	32.884	47.1957	37.6112	75.4815	47.7697
chrIII:10445383-10445673	CELE1	0.98709	NA	NA	NA	NA	NA	NA	NA	-0.132894	0.128673	-0.95528	-0.229966	-0.272514	0.410157	0.877109	0.649956	19.1865	25.4664	0	17.1165	16.4075	11.9848	20.8972	16.1596	9.52208	29.841
chrIII:10558789-10558989	CELE1	NA	NA	NA	NA	NA	NA	NA	NA	-0.219418	0.178157	0	-0.218451	-0.233111	0	0	0	0	7.13696	0	0	0	0	0	0	0	4.88769
chrIII:10559698-10560039	CELE1	NA	NA	NA	NA	NA	NA	NA	NA	0	0	-0.336981	0	0.271038	-0.341202	-0.331379	0.195347	0	0	0	0	1.47602	0	0	3.53612	2.78315	0
chrIII:10595833-10595974	CELE1	NA	NA	NA	NA	NA	NA	NA	NA	0.198115	-0.240817	-0.302806	-0.245032	0.356324	-0.870257	-0.848168	-0.861468	9.88798	0	7.98739	0	13.6696	0	0	0	19.8114	6.6958
chrIII:10603863-10604039	CELE1	NA	NA	NA	NA	NA	NA	NA	NA	-0.172626	-0.323051	0.147755	-0.330564	-0.0844736	0.0764546	0.235077	0.156878	11.7869	8.44094	10.0965	8.46967	13.8185	9.03871	11.6109	10.3758	10.5163	21.6657
chrIII:10627065-10627429	CELE1	NA	NA	NA	NA	NA	NA	NA	NA	0.57469	0.490115	0.818029	-0.719619	-0.068142	0.552419	0.277094	0.443133	13.4276	12.1168	8.23848	0	5.31803	5.67612	3.65099	4.9083	2.4919	7.90146
chrIII:10635907-10636229	CELE1	NA	NA	NA	NA	NA	NA	NA	NA	0.468922	0.27898	0.235289	0.47911	0.758376	0.180594	-0.342972	-0.356484	4.30604	2.4049	4.04251	4.43535	7.57238	3.49201	0	0	2.81593	0
chrIII:10639931-10640206	CELE1	NA	NA	NA	NA	NA	NA	NA	NA	-0.00317468	-0.241155	0.647714	-0.244316	0.237844	0	0.941561	0	2.54365	0	4.42018	0	5.34543	0	7.3443	0	0	3.44494
chrIII:10641525-10641815	CELE1	NA	NA	NA	NA	NA	NA	NA	NA	-0.0173186	0.194001	-0.345245	-0.0100082	-0.594854	0.847736	0.222452	0.515645	7.21484	10.2684	2.24353	7.27034	1.60049	15.5041	6.96573	10.4669	6.25116	10.0194
chrIII:10654434-10654665	CELE1	NA	NA	NA	NA	NA	NA	NA	NA	0.444556	0.0274829	0.388132	-0.20038	0.590438	0.117902	-0.00446471	0.738471	18.0993	9.78806	7.33325	6.17508	21.2535	4.06837	2.99317	12.9348	3.92045	12.4312
chrIII:10710859-10711139	CELE1	NA	NA	1	NA	NA	NA	NA	NA	-0.608549	-0.564076	-0.137911	-0.263362	-0.293167	0.610812	0.133999	0.154934	7.4716	8.08124	10.7012	12.8641	12.2971	23.4287	14.6273	14.8229	16.6356	24.1356
chrIII:10754003-10754330	CELE1	0.98709	NA	1	NA	NA	NA	NA	NA	-0.561893	0.429087	0.341679	-0.0693107	-0.323393	-0.0189601	0.0861415	0.0765369	17.0423	45.5502	23.5226	28.6945	22.3708	16.6328	18.4542	18.2981	22.3129	40.8723
chrIII:10767951-10768238	CELE1	NA	NA	NA	NA	NA	NA	NA	NA	-0.0145669	-0.175185	-0.095671	-0.397921	0.171146	0.343502	-0.29843	0.145338	7.31299	4.98101	3.93823	2.37171	9.97418	8.19325	2.31356	6.37682	6.46313	10.1238
chrIII:10802973-10803092	CELE1	NA	NA	NA	NA	NA	NA	NA	NA	0.431108	0	1.23036	0	0.168088	0	0	0.628078	11.6456	0	25.7734	0	3.88118	0	0	10.0779	0	0
chrIII:10804235-10804603	CELE1	NA	NA	NA	NA	NA	NA	NA	NA	-0.243866	-0.241678	2.04132	-0.243076	-0.0567337	0.572987	-0.0176969	0.206088	0	0	27.9861	0	1.36802	5.61459	1.88188	3.15545	2.5795	2.5767
chrIII:10806272-10806580	CELE1	NA	NA	NA	NA	NA	NA	NA	NA	0	0	0.77833	0	0.271038	0	0	0	0	0	6.06096	0	1.63365	0	0	0	0	0
chrIII:10830316-10830368	CELE1	NA	NA	NA	NA	NA	NA	NA	NA	NA	NA	NA	NA	NA	NA	NA	NA	0	0	0	0	0	0	0	0	0	0
chrIII:10863817-10863982	CELE1	NA	NA	NA	NA	NA	NA	NA	NA	0.171247	-0.476068	-0.046896	-0.226014	-0.129163	-0.399992	-0.658647	-0.0607146	12.6078	0	7.86585	4.11477	6.08191	2.84296	0	7.55629	11.2131	11.646
chrIII:10935043-10935340	CELE1	NA	NA	NA	NA	NA	NA	NA	NA	-0.885218	-0.356247	0.286183	-0.515864	-0.123993	0.361859	0.376152	0.576841	4.68951	12.0346	10.3785	9.61488	16.4153	11.3549	11.4626	14.2793	9.29841	26.0555
chrIII:10940993-10941377	CELE1	NA	NA	1	NA	NA	NA	NA	NA	0.119418	0.503379	-0.133967	-0.16719	0.0123225	0.0560788	-1.3674	0.305855	9.0315	15.2134	7.81051	5.49524	7.76554	9.53671	0	12.6816	12.1418	10.0427
chrIII:11071010-11071366	CELE1	NA	NA	NA	NA	NA	NA	NA	NA	-0.183229	-0.349947	1.00786	-0.16549	0.322572	0.114636	-0.0206958	-0.0680142	5.88101	4.01829	11.6002	6.11256	12.5072	2.64387	1.8664	1.63076	2.66621	10.8304
chrIII:11136042-11136386	CELE1	0.98709	0.910139	1	0.976167	0.445385	0.999728	0.946337	0.756823	-0.275244	-0.438725	0.329051	0.0691618	0.598969	0.0244066	-0.254241	0.579224	81.0321	70.8506	88.7083	106.178	158.094	71.3918	56.9046	108.014	92.088	135.127
chrIII:11154110-11154299	CELE1	NA	NA	NA	NA	NA	NA	NA	NA	0.471801	0.495106	-1.57334	0.25604	0.338649	-0.317251	-0.185491	-0.654407	7.35512	7.86341	0	3.59501	4.90254	15.3254	17.8303	9.66591	29.1676	0
chrIII:11179598-11179895	CELE1	NA	NA	NA	NA	NA	NA	NA	NA	-0.705856	-0.404691	0.181778	-0.31025	-0.486215	0.0953917	-0.231209	0.428834	9.37901	14.4416	11.9938	16.4912	13.2895	10.7373	6.70778	16.0819	12.6344	32.3306
chrIII:11271953-11272124	CELE1	NA	NA	NA	NA	NA	NA	NA	NA	-0.707184	-0.280079	-1.43501	-0.476487	0.0498056	-0.94281	-0.448895	-0.912904	4.08167	13.2025	3.29712	8.71589	21.8895	10.3716	19.5328	10.4159	42.7961	28.375
chrIII:11513832-11514190	CELE1	NA	NA	NA	NA	NA	NA	NA	NA	-0.795141	-0.556517	1.50651	-0.394863	-0.127006	0.990461	0.66678	0.320031	1.95556	4.32748	11.7744	6.26378	9.73407	6.28368	3.71201	1.747	0	16.067
chrIII:11519637-11519931	CELE1	NA	NA	NA	NA	NA	NA	NA	NA	-0.165024	0.590371	0.214659	-0.507509	-0.53611	-0.182123	0.146819	-0.12162	9.4295	25.3228	12.4065	4.85633	5.00115	7.64692	11.4839	8.19899	12.7629	16.2225
chrIII:11530203-11530583	CELE1	0.98709	NA	1	NA	NA	NA	NA	NA	0.182125	0.0129817	0.529949	0.305236	0.382541	0.399994	-0.461041	0.0371195	16.4621	13.3343	13.8464	18.9753	20.3788	12.3248	3.64522	7.87633	9.99304	17.8838
chrIII:11591799-11592108	CELE1	NA	NA	1	NA	NA	NA	NA	NA	0.15748	1.51705	0.618221	0.599634	0.379197	-0.0779045	0.402345	0.69768	9.03731	41.2538	21.5063	16.0674	12.3971	10.3216	17.3764	23.1165	14.8065	9.30333
chrIII:11610302-11610616	CELE1	NA	NA	NA	NA	NA	NA	NA	NA	-0.00790585	0.219293	0.516925	-0.257926	-0.286524	0.246497	0	0.535998	2.22872	4.74301	3.60067	0	0	1.49819	0	3.83921	0	3.11881
chrIII:11613343-11613406	CELE1	NA	NA	NA	NA	NA	NA	NA	NA	0.216223	-0.264976	0.869047	0.409254	-0.0937091	-0.824086	-0.461243	-0.292301	21.8355	0	114.372	33.0573	7.88748	10.2498	20.8221	28.6957	56.8465	14.8563
chrIII:11619308-11619541	CELE1	NA	NA	NA	NA	NA	NA	NA	NA	0.258102	0	-0.322943	0.0928532	0.252427	-0.394046	-0.653876	-0.331452	9.0006	0	2.79003	2.91902	8.62903	2.0168	0	2.68022	8.13536	0
chrIII:11745272-11745565	CELE1	NA	NA	NA	NA	NA	NA	NA	NA	-0.0162379	-0.206645	0.198124	0.836958	0.128721	-1.20773	0.155512	-0.522883	4.77583	2.64212	11.8653	19.2652	6.60231	0	11.523	4.26647	12.5186	6.68316
chrIII:11750712-11751029	CELE1	NA	NA	NA	NA	NA	NA	NA	NA	-0.611795	-0.870936	0.579284	-0.17913	0.0262847	0.355259	0.259999	0.42789	2.18687	0	7.1334	6.65305	9.03322	5.03098	4.19061	5.77523	2.8602	12.1587
chrIII:11781202-11781563	CELE1	NA	NA	NA	NA	NA	NA	NA	NA	0.471107	0.483271	0.613549	0	0.3531	-0.103847	-0.0107194	-0.388923	3.86042	3.96279	6.74017	0	2.68105	1.30368	1.91827	0	2.62938	0
chrIII:11891709-11892010	CELE1	NA	NA	NA	NA	NA	NA	NA	NA	0.173437	-0.222649	-0.608278	-0.224925	-0.0748763	-0.371942	0.376188	-0.329623	4.60547	0	2.16181	0	1.54219	3.73483	11.4039	4.00447	9.17525	3.25306
chrIII:11893886-11893948	CELE1	NA	NA	NA	NA	NA	NA	NA	NA	0.240116	0	0.302058	0	0.704343	0.32092	0.836625	0	11.1436	0	9.00167	0	37.5836	10.4125	32.175	0	0	0
chrIII:11901801-11901976	CELE1	0.98709	NA	1	NA	NA	NA	NA	NA	-0.431851	-0.206778	0.0440343	-0.420975	-0.611081	0.0578008	0.0591541	-0.526208	39.7762	49.9189	42.0772	39.9435	33.0866	43.2248	42.4427	23.9218	53.3607	82.8311
chrIII:11934813-11934962	CELE1	NA	NA	NA	NA	NA	NA	NA	NA	-0.469509	0.000626933	0.517726	0.335816	0.240401	-0.751735	-0.0241686	-0.371859	0	9.56353	20.047	19.545	15.7851	0	8.88409	3.8812	12.4092	13.099
chrIII:11957257-11957337	CELE1	NA	NA	1	NA	NA	NA	NA	NA	0.578068	0.413814	-0.159359	0.261564	0.711325	-0.11177	-0.332198	0.203763	77.5148	63.4554	50.0678	52.2387	88.6594	53.4274	41.477	74.0959	79.6468	48.5148
chrIII:11981245-11981375	CELE1	NA	NA	NA	NA	NA	NA	NA	NA	-0.0140513	0.188767	-0.358395	-0.47346	0.0018271	-0.0872397	-0.000978495	0.21502	10.7183	16.8802	0	0	10.964	3.60253	5.30088	9.23169	6.94308	14.9989
chrIII:11988251-11988589	CELE1	NA	NA	NA	NA	NA	NA	NA	NA	-0.184174	-0.15181	0.0439568	-0.185934	0.118388	-0.40341	-0.734316	-0.501796	6.19327	6.52304	8.61736	6.0447	9.96272	4.17638	1.96551	3.70013	10.9816	11.4055
chrIII:12013352-12013649	CELE1	NA	NA	NA	NA	NA	NA	NA	NA	0.184753	0.207985	0.199578	-0.241061	0.222917	0.214321	-0.347224	0.184973	4.66729	5.01358	4.09386	0	5.08186	4.40261	0	3.90725	3.19408	3.29673
chrIII:12015864-12016133	CELE1	NA	NA	1	NA	NA	NA	NA	NA	-0.0289301	-0.486039	-0.303576	-0.157025	0.634856	0.153596	0.347527	0.0174757	12.9028	5.53351	10.8196	10.612	28.7567	18.4578	22.5225	16.0934	20.682	18.1931
chrIII:12043193-12043454	CELE1	NA	NA	1	NA	NA	NA	NA	NA	-0.378243	-0.343424	1.12792	0.501471	0.0230081	0.999998	1.07625	0.625996	5.30859	5.70247	16.461	21.6181	11.4112	14.0139	15.4735	9.05997	3.63297	14.7575
chrIII:12048104-12048324	CELE1	0.98709	NA	1	NA	NA	0.999728	NA	NA	-0.955072	0.177556	0.0318375	0.463553	-0.239296	0.0727489	-0.0452707	0.670336	18.9403	61.3822	33.1214	78.9931	41.6317	34.0603	30.6584	57.3561	42.4954	69.695
chrIII:12062598-12062808	CELE1	NA	NA	NA	NA	NA	NA	NA	NA	0.491586	0.713514	1.17038	0	0.18501	0.327267	0.365242	1.02439	6.62309	10.7622	13.845	0	2.39241	3.10895	3.15785	11.463	0	0
chrIII:12074606-12074761	CELE1	NA	NA	NA	NA	NA	NA	NA	NA	-0.443616	-0.438523	0.198725	-0.205332	-0.11131	-0.0492304	0.239878	0.184034	0	0	7.82033	4.37853	6.22141	4.20506	8.54239	7.46384	6.10152	12.1898
chrIII:12130310-12130409	CELE1	NA	NA	NA	NA	NA	NA	NA	NA	0.633766	0	1.16038	0.260927	0.168144	0.306476	0	0.795147	20.9952	0	31.7857	7.49566	4.65742	6.55989	0	18.3652	0	0
chrIII:12149158-12149318	CELE1	NA	NA	NA	NA	NA	NA	NA	NA	-0.515784	-0.226442	NA	-0.00225604	0.0161804	NA	NA	NA	0	4.45506	0	8.89824	8.921	0	0	0	0	12.0076
chrIII:12159997-12160151	CELE1	0.98709	0.992938	1	0.450089	0.099656	0.636187	0.238432	0.163528	-0.0656374	-0.0359476	0.273538	0.685687	0.951143	0.720516	0.807054	0.921101	207.153	212.058	294.324	366.275	446.586	405.436	433.012	470.15	317.281	292.388
chrIII:12171781-12172105	CELE1	NA	NA	NA	NA	NA	NA	NA	NA	0.1316	0.0299818	0.33555	-0.601025	-0.100861	-0.634334	-0.233616	-0.323631	10.7803	9.37727	13.0062	2.1017	7.52578	2.90419	6.23701	5.37397	11.5848	11.8968
chrIII:12213904-12214083	CELE1	NA	NA	NA	NA	NA	NA	NA	NA	-0.275474	0.747594	0.289877	0.225609	0.0676312	0.229752	0.306886	0.282259	0	20.5853	3.62703	7.95899	5.17491	2.62184	3.85786	3.48429	0	5.28224
chrIII:12214378-12214617	CELE1	NA	NA	NA	NA	NA	NA	NA	NA	-0.19247	-0.647001	-0.31727	-0.172683	0.293246	-0.361451	-0.00782501	-0.0479051	5.85039	0	2.36294	6.24638	14.2351	1.96638	5.66967	5.22643	7.57953	12.0168
chrIII:12238866-12238977	CELE1	NA	NA	NA	NA	NA	NA	NA	NA	-0.00891344	0.190383	-0.859706	-0.232995	-0.0729613	-0.531002	-0.241281	-0.86052	6.20916	12.8083	0	0	4.50713	5.85704	12.1493	0	25.4956	8.77165
chrIII:12282887-12283042	CELE1	NA	NA	NA	NA	NA	NA	NA	NA	0	0.334987	0	0	0	0.692133	0	0	0	4.97937	0	0	0	11.4353	0	0	0	0
chrIII:12365691-12366030	CELE1	NA	NA	NA	NA	NA	NA	NA	NA	-0.00946266	0.406718	0.936631	0.217208	-0.107796	0.246613	1.16627	0	2.06484	6.67891	6.92406	4.40921	1.36983	1.38803	9.79862	0	0	2.88949
chrIII:12406131-12406437	CELE1	NA	NA	NA	NA	NA	NA	NA	NA	-0.00472843	0.224005	0.371701	0.199667	0.20102	0.447752	-0.329012	0.67789	2.2868	5.06047	8.22704	4.66651	4.55122	8.88525	2.17038	11.6712	6.06313	3.09708
chrIII:12455103-12455252	CELE1	0.98709	NA	1	NA	NA	NA	NA	NA	-0.475348	-0.691348	-0.471194	-0.916157	-0.718874	0.0605126	-0.249661	-0.495338	70.0281	56.5672	32.5326	44.0871	54.6067	56.3174	40.728	31.3495	69.2375	148.741
chrIII:12461901-12462198	CELE1	NA	NA	NA	NA	NA	NA	NA	NA	0.424081	-0.178894	0.0242342	0.296849	0.0502926	0.0579333	-0.421911	0.03092	14.0907	4.81386	11.9938	11.6838	7.94552	12.3209	6.80211	12.1747	15.5446	9.67796
chrIII:12462599-12462757	CELE1	NA	NA	NA	NA	NA	NA	NA	NA	0.568165	0.197609	-0.0804057	0.160569	0.286089	0.447939	0.907559	0.146928	30.7412	18.793	7.67277	17.602	21.2413	17.1558	29.8646	11.2675	11.4408	18.3374
chrIII:12474901-12475201	CELE1	NA	NA	NA	NA	NA	NA	NA	NA	0.646634	0.488917	-1.20653	0.251646	0.623437	-0.897241	-0.475454	-0.105512	6.99715	4.96361	0	2.26927	6.44877	1.56788	4.52067	7.88608	12.2275	0
chrIII:12558496-12558608	CELE1	NA	NA	NA	NA	NA	NA	NA	NA	0	0.334987	NA	0	0	NA	NA	NA	0	6.87418	0	0	0	0	0	0	0	0
chrIII:12580194-12580420	CELE1	NA	NA	NA	NA	NA	NA	NA	NA	-0.282036	-0.587389	0.22387	-0.595558	-0.489465	0.803853	-0.0166824	-0.0834201	12.2542	6.5817	5.37432	6.60411	8.37896	12.8274	3.0591	2.56467	4.19311	25.41
chrIII:12651222-12651561	CELE1	0.984402	NA	1	NA	NA	NA	NA	NA	-1.2769	0.0386702	-0.712629	-0.357231	0.754642	-0.446033	-1.24334	-0.511595	2.06484	19.8617	14.8571	12.6407	38.8233	18.8218	7.92157	17.9169	38.0738	25.4473
chrIII:12661438-12661665	CELE1	NA	NA	NA	NA	NA	NA	NA	NA	0.223158	0.637595	0.363342	0.612836	0.0571795	-0.420888	-0.02422	-0.364971	6.12927	13.1057	11.0776	12.5668	4.25675	2.06987	5.84479	2.55342	8.16395	4.30888
chrIII:12662984-12663150	CELE1	NA	NA	NA	NA	NA	NA	NA	NA	-0.171469	-0.786839	0.274508	-0.794159	0.00865896	0.754687	0	0.743704	12.5323	0	3.39584	0	16.7332	11.7842	0	11.2666	0	23.3418
chrIII:12670703-12670808	CELE1	0.98709	0.981742	1	0.906529	0.624822	0.999728	0.967142	0.837265	-0.0326892	-0.0954748	-0.290886	-0.191739	-0.352303	-0.363156	-0.119998	-0.339873	777.276	740.847	566.872	690.075	615.297	537.692	641.585	547.206	926.898	1070.06
chrIII:12671285-12671401	CELE1	0.98709	0.922151	1	0.940427	0.718617	0.999728	0.994585	0.979235	-0.0100017	-0.232212	-0.250402	0.114837	-0.217664	-0.102647	-0.0105364	0.0790207	1426.46	1217.69	899.828	1559.35	1230.03	1003	1067.33	1136.97	1422.61	1930.51
chrIII:12684106-12684255	CELE1	NA	NA	NA	NA	NA	NA	NA	NA	0	0.644664	0.33824	0	0.474433	0.518381	0.673449	1.21859	0	15.5356	4.35244	0	9.83559	6.29242	9.07148	20.3058	0	0
chrIII:12684509-12684671	CELE1	NA	NA	NA	NA	NA	NA	NA	NA	0.156284	-0.19252	-0.0941524	-0.215439	-0.147475	0.619261	0.620951	0.341413	12.8399	4.76553	7.48448	4.1905	5.71462	20.7593	20.7837	14.5626	11.4195	12.0543
chrIII:12710538-12710977	CELE1	0.98709	0.957752	1	0.613968	0.35634	0.999728	0.943049	0.792883	0.163415	0.178256	-0.388553	0.359389	-0.429471	-0.321735	0.18084	-0.382531	314.386	317.424	188.314	361.189	205.403	197.6	285.582	190.057	331.798	375.122
chrIII:12730237-12730592	CELE1	NA	NA	NA	NA	NA	NA	NA	NA	-0.260625	-0.721726	1.20269	-0.242754	-0.383792	1.42879	0.904463	1.59831	9.86021	4.02958	8.68766	10.1539	8.17871	11.3476	5.85181	13.4618	0	18.962
chrIII:12733393-12733853	CELE1	0.98709	NA	1	NA	NA	NA	NA	NA	-0.255592	-0.504347	0.799354	-0.124755	0.556691	0.991379	-0.224477	0.975302	9.10854	6.22356	14.462	10.6603	22.1479	17.526	4.458	17.1004	7.89192	16.7056
chrIII:12774626-12774753	CELE1	NA	NA	NA	NA	NA	NA	NA	NA	NA	NA	0.413557	NA	NA	0	0	0	0	0	5.10051	0	0	0	0	0	0	0
chrIII:12816603-12816698	CELE1	0.98709	0.731829	1	0.639286	0.718234	0.999728	0.968964	0.823762	0.324707	0.525669	-0.0478642	0.47957	0.308633	0.207911	0.124876	0.385966	603.943	699.126	417.578	677.962	597.291	503.542	473.225	573.417	571.326	635.823
chrIII:12825187-12825401	CELE1	NA	NA	NA	NA	NA	NA	NA	NA	0.208686	0.00279303	-1.19126	-0.0104456	0.502388	-0.187321	-0.82871	-0.649729	6.49987	3.33612	2.6377	3.17698	11.3762	15.7384	6.1982	8.54197	26.1695	4.56942
chrIII:12870305-12870387	CELE1	NA	NA	NA	NA	NA	NA	NA	NA	-0.00281779	0.0148181	0.545833	-0.230246	-0.0745371	0.251812	0.325078	0	8.4584	9.35882	14.6984	0	5.61135	5.68592	8.02779	0	0	11.4555
chrIII:12870666-12870950	CELE1	NA	NA	NA	NA	NA	NA	NA	NA	0.154631	0.612473	0.174426	-0.209003	-0.0777323	-0.127061	0.231131	0.165335	9.80683	18.4524	6.57136	4.79334	6.67377	3.95761	7.11238	6.44394	6.53116	10.1194
chrIII:12889935-12890058	CELE1	0.98709	NA	1	NA	NA	NA	NA	NA	-0.629296	-0.686678	0.154905	-0.103044	-0.765226	0.152907	-0.0356305	-0.0109738	45.0798	41.9307	40.7371	78.1915	39.1347	40.1904	32.694	33.5907	45.0334	117.567
chrIII:12918109-12918384	CELE1	NA	NA	NA	NA	NA	NA	NA	NA	0.847982	-0.271639	0.71869	-0.0105115	0.242723	-1.44268	-0.983096	-1.03073	15.1659	0	26.8318	2.47482	5.34543	0	2.41415	2.27236	16.7837	3.55951
chrIII:12935205-12935545	CELE1	NA	NA	NA	NA	NA	NA	NA	NA	-1.10725	-0.554681	-0.0969677	-1.59972	-0.695129	-0.156553	0.455169	0.370868	4.09816	10.6916	3.57763	0	8.76755	3.30768	7.98077	7.22491	5.45859	28.3465
chrIII:12990766-12990840	CELE1	NA	NA	NA	NA	NA	NA	NA	NA	0	0	1.1531	0	0.261956	0	0	0	0	0	41.2374	0	6.20989	0	0	0	0	0
chrIII:13016217-13016551	CELE1	NA	NA	NA	NA	NA	NA	NA	NA	0.773414	0.637261	0.265216	0	0.161876	0	0.555764	0.269179	8.32336	6.42327	1.69285	0	1.50686	0	4.14576	1.73785	0	0
chrIII:13066369-13066743	CELE1	NA	NA	1	NA	NA	NA	NA	NA	0.570125	0.191831	0.54136	-0.708367	0.746924	-0.253642	-0.428204	0.626502	13.0696	7.80954	16.495	0	15.6328	6.78324	5.40541	17.7971	12.3528	7.69075
chrIII:13097101-13097349	CELE1	NA	NA	NA	NA	NA	NA	NA	NA	0.104654	-0.274743	0.182849	0.0980564	-0.377877	0.561084	0.257388	0.188954	16.837	8.88077	4.55506	16.4591	7.48179	9.0596	5.35186	4.67614	3.82264	19.3464
chrIII:13114680-13114890	CELE1	NA	NA	NA	NA	NA	NA	NA	NA	0.319981	0	0	0	0	0.274905	0	0.315785	3.29586	0	0	0	0	2.23664	0	2.75915	0	0
chrIII:13140756-13140893	CELE1	NA	NA	NA	NA	NA	NA	NA	NA	0.243455	0	0.455254	0.454783	0.179047	-0.120627	0.52764	-0.0651097	5.03932	0	12.9498	10.3813	3.65796	3.41979	14.6886	4.21869	6.5909	0
chrIII:13144137-13144516	CELE1	NA	NA	NA	NA	NA	NA	NA	NA	0.244994	0.764069	1.62887	0.252867	0.336489	0.250271	1.13609	0.858654	11.085	21.0762	12.3904	11.1351	12.4619	1.24192	7.08772	4.83296	0	10.1749
chrIII:13176537-13176879	CELE1	NA	NA	NA	NA	NA	NA	NA	NA	-0.197221	-0.160232	-0.0707326	0.145684	-0.0625008	0.120766	0.49773	0.434294	4.09357	4.52934	1.65337	8.15953	5.54526	2.75179	5.99165	5.35429	2.77503	8.50045
chrIII:13182546-13182912	CELE1	NA	NA	NA	NA	NA	NA	NA	NA	-0.600334	0.16467	-0.300485	-0.3774	0.11881	-0.522917	-0.189981	-0.892445	1.91293	10.0963	7.95991	3.72235	9.20262	6.1467	9.23093	3.41783	15.2156	10.6215
chrIII:13183281-13183557	CELE1	NA	NA	NA	NA	NA	NA	NA	NA	-0.202608	-0.183006	1.11664	-0.427338	-0.27679	0.245625	0.352819	0.805674	2.51056	2.80427	10.5462	0	1.68138	1.70372	2.50691	6.79247	0	7.09332
chrIII:13223166-13223523	CELE1	NA	NA	NA	NA	NA	NA	NA	NA	-0.232073	0.0148658	0	0.00753774	-0.0651587	0.307086	0.82235	1.06625	0	2.16978	0	2.09376	1.41005	1.83237	5.74061	8.131	0	2.65588
chrIII:13225746-13226102	CELE1	NA	NA	NA	NA	NA	NA	NA	NA	-0.201853	-0.393994	-0.347616	-0.192185	-0.196935	0.439472	0.238417	0.386216	3.91449	2.17586	0	4.01293	3.9138	5.28774	3.73281	5.01829	2.54774	8.1671
chrIII:13265429-13265742	CELE1	0.98709	NA	1	NA	NA	NA	NA	NA	0.346851	0.125283	-0.305693	0.090103	0.277116	0.106925	-0.0338623	0.420286	24.5518	18.8429	7.77052	18.0381	22.3732	12.8654	10.6995	17.5464	14.7526	21.6998
chrIII:13269773-13270093	CELE1	NA	NA	NA	NA	NA	NA	NA	NA	0.345139	-0.71051	0.673926	-0.727097	-0.135468	0.391151	1.09578	0.459994	17.4552	2.41988	7.60106	2.3351	8.9488	4.98396	12.8046	5.58109	2.83347	14.9085
chrIII:13273125-13273297	CELE1	NA	NA	NA	NA	NA	NA	NA	NA	0	0	0	0	0.261956	0.284288	0.307404	0.490159	0	0	0	0	2.69215	3.79184	4.01396	6.7304	0	0
chrIII:13277691-13278027	CELE1	0.98709	NA	1	NA	NA	NA	NA	NA	-0.317618	-1.16953	0.72079	-1.35041	-1.10891	-0.429083	0.314469	0.810819	24.9201	8.69014	18.3549	6.6727	9.90595	4.74733	12.1132	19.9375	11.1723	46.0803
chrIII:13281665-13281944	CELE1	0.98709	NA	1	NA	NA	0.999728	NA	NA	0.110253	-0.494449	0.23551	-0.533262	0.24298	0.73278	1.05481	1.00656	39.8332	21.5561	19.4535	20.7035	44.6423	30.9116	41.3578	39.8361	19.9434	48.1048
chrIII:13337335-13337657	CELE1	NA	NA	NA	NA	NA	NA	NA	NA	-0.182887	-0.604428	1.19877	-0.184729	-0.310523	0.271904	0	0.32552	4.30604	0	9.04423	4.22942	2.88385	1.46109	0	1.80241	0	9.02679
chrIII:13337693-13337972	CELE1	NA	NA	NA	NA	NA	NA	NA	NA	0.439397	0	0	0	0	0	0	0.599599	4.96733	0	0	0	0	0	0	4.31911	0	0
chrIII:13349536-13349824	CELE1	NA	NA	NA	NA	NA	NA	NA	NA	-0.0178057	-0.577261	1.72729	-0.784375	-0.452522	1.39437	0.894632	0.991376	14.4608	4.96377	19.1445	2.59365	6.98683	13.3415	7.1112	8.05785	0	19.9587
chrIII:13354435-13354557	CELE1	NA	NA	NA	NA	NA	NA	NA	NA	0.747018	0.255108	-0.0258143	0.613526	0.297385	-0.376566	-0.350443	0.22509	22.8308	6.3153	5.30785	17.7413	7.57304	0	0	10.1979	7.39467	0
chrIII:13431992-13432127	CELE1	NA	NA	NA	NA	NA	NA	NA	NA	NA	NA	NA	NA	NA	NA	NA	NA	0	0	0	0	0	0	0	0	0	0
chrIII:13468516-13468682	CELE1	NA	NA	NA	NA	NA	NA	NA	NA	-0.471906	-0.264242	-0.501439	-0.642458	-1.0261	-0.16158	-0.663972	-0.121355	12.5323	17.8928	10.7011	8.97684	3.02275	17.4361	8.14803	17.9694	27.7384	34.918
chrIII:13505506-13505768	CELE1	NA	NA	NA	NA	NA	NA	NA	NA	1.19698	0.775065	0.351877	0.589466	1.05446	-0.789165	0.78149	-0.377259	23.9237	14.3151	8.95126	10.8944	19.7767	0	15.4147	2.38468	7.07749	3.73546
chrIII:13549333-13549703	CELE1	0.98709	NA	1	NA	NA	NA	NA	NA	0.154362	-0.212124	1.01704	0.337253	0.509796	1.43135	0.879361	1.70143	18.7625	11.7604	14.6819	22.9897	27.3102	22.2737	12.6476	28.0107	5.1312	21.0991
chrIII:13576385-13576719	CELE1	NA	NA	NA	NA	NA	NA	NA	NA	-0.328011	-0.293488	0.511814	-0.751352	-0.298443	-0.365852	-0.31625	-0.0788588	4.1518	4.63751	8.97626	0	4.52058	1.95818	1.98897	3.61	5.55636	11.5417
chrIII:13609624-13609729	CELE1	NA	NA	NA	NA	NA	NA	NA	NA	0.319981	0	-0.0224722	0	0	-0.0793503	-0.299194	-0.30419	6.56062	0	6.15911	0	0	4.45218	0	0	8.97959	0
chrIII:13627149-13627503	CELE1	NA	NA	1	NA	NA	NA	NA	NA	-0.129757	-0.78618	0.03778	-0.821756	-0.771625	-0.112268	-0.825158	-0.297216	15.7089	6.3967	12.6318	5.95963	6.77978	10.3426	3.83302	8.45319	15.8491	24.4612
chrIII:13686728-13686835	CELE1	NA	NA	NA	NA	NA	NA	NA	NA	0	0.466736	0.779261	0.431529	0.58914	0	0.343198	0.310916	0	14.3849	17.3411	12.6491	17.973	0	6.42977	5.80715	0	0
chrIII:13779391-13779568	CELE1	NA	NA	NA	NA	NA	NA	NA	NA	-0.377938	-0.578355	-0.387763	0.402061	-0.232659	0.450588	-0.0258812	0.678784	7.81377	4.02958	3.18598	28.73	10.9049	15.3246	7.48659	20.3823	10.4572	21.8993
chrIII:335171-335540	CELE1	NA	NA	NA	NA	NA	NA	NA	NA	-0.182294	-0.155941	-0.299519	0.257077	0.290912	0.335402	-0.255124	0.103934	5.65648	5.81566	3.529	11.2563	11.6455	9.1453	3.67763	6.78023	7.60329	10.4499
chrIII:556043-556146	CELE1	NA	NA	NA	NA	NA	NA	NA	NA	0.399308	0.235281	-0.444306	0	0.150065	-0.450092	-0.434691	-0.444906	13.3736	7.46906	0	0	4.47829	0	0	0	9.15228	0
chrIII:556331-556414	CELE1	NA	NA	NA	NA	NA	NA	NA	NA	0.217666	0.226334	-0.0683049	0.229459	0.442813	-0.0573327	-0.303528	-0.0717815	8.27888	8.53887	14.5235	8.92341	18.0285	15.6188	8.26685	14.397	22.1593	0
chrIII:639332-639405	CELE1	NA	NA	NA	NA	NA	NA	NA	NA	0	0	0	0	0.271038	0	0.335694	0.752617	0	0	0	0	6.8216	0	9.38399	24.8179	0	0
chrIII:1063517-1063657	CELE1	NA	NA	NA	NA	NA	NA	NA	NA	-0.280605	-0.27049	0.129957	0.221644	0.736713	-0.399453	-0.293817	-0.0794328	0	0	12.6743	10.1604	24.5069	3.34703	4.92493	8.57696	13.5012	6.96755
chrIII:1063833-1064071	CELE1	NA	NA	NA	NA	NA	NA	NA	NA	-0.182746	0.0380928	0.793015	0.266693	0.113994	-0.390398	0.180083	-0.117866	8.7846	13.0005	22.7907	17.7043	14.2946	4.71933	11.2692	7.3077	11.5938	16.1776
chrIII:1396632-1397027	CELE1	NA	NA	1	NA	NA	NA	NA	NA	0.225391	-0.411062	-0.386891	-0.881308	-1.32821	-1.19462	-0.76972	-0.867132	22.9634	11.1682	10.6743	5.67853	2.35223	3.57524	6.87233	6.10784	21.0987	24.3296
chrIII:1962235-1962286	CELE1	NA	NA	NA	NA	NA	NA	NA	NA	-0.221221	-0.21791	0.770801	-0.00948147	0.0854264	0.297307	0.592185	0	0	0	37.6653	13.1356	19.4153	12.6152	26.7083	0	0	18.8928
chrIII:2359794-2359912	CELE1	NA	NA	NA	NA	NA	NA	NA	NA	0.39338	0.0323026	0.392083	0.719707	-0.263761	-0.134758	-0.264265	0.252106	41.1856	25.6102	29.3142	59.6351	16.6398	14.9908	11.1984	24.8394	23.2851	32.4912
chrIII:2360097-2360272	CELE1	NA	NA	NA	NA	NA	NA	NA	NA	0.575474	0.020732	0.381465	-0.00618956	1.15528	0.0807763	0.396889	-0.743944	15.918	4.41353	25.7775	3.88097	33.5304	18.636	26.8202	3.30784	21.1521	5.40229
chrIII:2489864-2490082	CELE1	NA	NA	NA	NA	NA	NA	NA	NA	0.259523	0.854706	0.140999	0.840443	0.327854	-0.384335	0.654949	-0.320936	3.20569	13.3725	8.55177	13.0833	4.25335	2.15494	18.255	2.8638	8.69258	0
chrIII:2490661-2490828	CELE1	NA	NA	NA	NA	NA	NA	NA	NA	-0.561307	-0.335345	-0.522739	-0.560475	-0.652931	-1.18157	-0.234408	-0.526316	4.13944	8.53887	7.26173	4.06578	3.00475	0	12.0656	7.19852	22.6628	23.0146
chrIII:2528731-2528791	CELE1	NA	NA	NA	NA	NA	NA	NA	NA	-0.247224	-0.245026	0	-0.24643	-0.0674595	0	0	0	0	0	0	0	7.63511	0	0	0	0	15.5869
chrIII:2543981-2544333	CELE1	NA	NA	1	NA	NA	NA	NA	NA	-0.13702	-0.499567	-0.142926	-0.244205	-0.217168	-0.521884	-0.339718	-0.426995	13.8466	8.12765	11.9746	11.9868	12.5383	7.7274	9.59702	8.756	18.6353	22.0854
chrIII:2617490-2617608	CELE1	NA	NA	NA	NA	NA	NA	NA	NA	-0.148454	-0.62502	0.175723	-0.656274	-0.665814	0.796992	-0.0201374	0.661969	29.4421	12.555	16.4588	11.4799	12.0696	34.8199	11.4346	30.4879	15.6419	48.4711
chrIII:2617685-2617738	CELE1	NA	NA	NA	NA	NA	NA	NA	NA	-0.00790261	-0.231604	0.248768	-0.232969	-0.244775	0.270988	0	0.265637	12.8783	0	10.5019	0	0	12.1479	0	11.6143	0	18.1931
chrIII:2681789-2681844	CELE1	NA	NA	NA	NA	NA	NA	NA	NA	-0.416546	-0.403424	0.96049	-0.416644	-0.0453552	0.241823	0.333055	0.290509	12.5366	12.8083	45.1018	12.1973	33.9647	8.42734	11.8983	10.3961	0	52.0652
chrIII:2685241-2685298	CELE1	NA	NA	NA	NA	NA	NA	NA	NA	-0.0114051	-0.40756	1.05421	-0.408008	-0.53141	0.282248	0	0	36.1986	12.3666	42.068	12.9236	8.03003	8.13675	0	0	0	49.7247
chrIII:2685337-2685398	CELE1	NA	NA	NA	NA	NA	NA	NA	NA	0	0	0.391579	0	0.388135	0	0	0	0	0	9.14685	0	15.0239	0	0	0	0	0
chrIII:2702756-2703151	CELE1	NA	NA	NA	NA	NA	NA	NA	NA	-0.216989	-0.455836	-0.093225	-0.460553	0.263931	-0.676214	-0.641374	-0.339724	1.77285	0	2.86417	0	6.17646	0	0	1.47015	4.80726	4.96174
chrIII:2717873-2717944	CELE1	NA	NA	NA	NA	NA	NA	NA	NA	NA	NA	NA	NA	NA	NA	NA	NA	0	0	0	0	0	0	0	0	0	0
chrIII:2732667-2732939	CELE1	NA	NA	NA	NA	NA	NA	NA	NA	-0.270135	0.218574	0.773034	0.21372	0.081259	0.455896	0.331266	0.284017	0	5.25469	7.17435	5.24768	3.55509	3.45737	2.54365	2.13253	0	3.59863
chrIII:2738907-2738979	CELE1	NA	NA	1	NA	NA	NA	NA	NA	0.0936124	-0.625888	0.0686648	-0.299691	0.107708	-0.208326	0.312125	1.05879	67.1382	20.4664	43.542	38.3386	67.5454	30.9019	55.9201	115.965	51.5761	80.3141
chrIII:2809531-2809818	CELE1	NA	NA	NA	NA	NA	NA	NA	NA	0.369516	0.0182026	0.189431	-0.00579871	0.671929	0.120817	0.263158	-0.399023	7.24402	2.69716	3.93823	2.37171	11.9982	3.2773	4.72473	0	3.30499	3.3014
chrIII:2822495-2822774	CELE1	NA	NA	NA	NA	NA	NA	NA	NA	-0.228285	-0.480841	-0.042221	-0.227904	0.150722	-0.143661	-0.258237	-0.583311	2.48366	0	4.66333	2.43947	6.79294	3.37094	2.48005	0	6.79884	6.90439
chrIII:2834062-2834369	CELE1	NA	NA	NA	NA	NA	NA	NA	NA	0.580712	0.245888	0.60721	0.226868	0.49775	0.212789	-0.0110955	0.19768	9.0745	4.8508	8.47878	4.65136	7.68755	4.25967	2.16333	3.92647	2.95306	3.18969
chrIII:3036578-3036857	CELE1	NA	NA	1	NA	NA	NA	NA	NA	0.104502	0.00883555	0.0318459	-0.1576	0.622094	-0.685601	-0.261006	-0.366481	14.9729	12.8083	25.5297	9.75787	28.2877	12.7422	19.3385	17.4371	33.0879	17.2045
chrIII:3442899-3442958	CELE1	NA	NA	NA	NA	NA	NA	NA	NA	-0.00169006	-0.182447	-0.0503721	-0.183196	0.0550876	1.2265	0.90707	-0.0720597	23.4016	0	10.8811	0	31.0494	79.9926	56.931	9.703	15.1591	31.6934
chrIII:3512888-3513209	CELE1	NA	NA	1	NA	NA	NA	NA	NA	-0.998738	-1.38259	-0.133454	-0.8143	-0.339953	-1.39016	-0.781612	-0.153615	6.54081	2.41237	17.4488	8.89824	16.3956	3.50286	8.45169	16.9707	26.3414	33.0701
chrIII:3615915-3616251	CELE1	NA	NA	NA	NA	NA	NA	NA	NA	-0.451239	-0.679145	-0.304588	-0.446112	-0.26338	-0.185984	0.130822	-0.682186	12.4011	8.86675	6.73122	12.3585	15.6658	8.09428	12.1967	3.72209	13.7457	28.9644
chrIII:3794358-3794682	CELE1	0.98709	NA	1	NA	NA	0.999728	NA	NA	-0.174788	-1.05874	0.544401	-0.418429	-0.80673	-0.737736	-0.133078	0.453659	51.5786	22.6191	47.7433	41.7742	29.5022	15.9005	26.9982	44.5145	40.3515	80.352
chrIII:4154822-4155163	CELE1	NA	NA	NA	NA	NA	NA	NA	NA	0	0.464268	-0.347842	0.240929	0	-0.35425	-0.00818364	0.211926	0	4.36856	0	1.99723	0	0	1.94826	3.53612	2.65949	0
chrIII:4199283-4199634	CELE1	0.98709	NA	1	NA	NA	0.999728	NA	NA	-0.102739	-0.254334	-0.601133	-0.215576	0.152797	-0.0895057	-0.568809	0.127163	31.7419	27.5044	18.6966	28.6785	39.7022	29.6567	19.3284	35.4992	42.5444	46.9077
chrIII:4286331-4286604	CELE1	NA	NA	NA	NA	NA	NA	NA	NA	-0.220921	0.0140241	-0.565791	-0.219901	-0.0571931	-0.323663	-0.251364	-0.283152	0	2.83497	0	0	1.84233	1.72238	2.43178	2.12474	6.63901	3.47009
chrIII:4521292-4521548	CELE1	NA	NA	NA	NA	NA	NA	NA	NA	0.366022	0.0172297	-0.326205	0.191835	0.0799267	0.109347	-0.317682	-0.0346336	8.16934	3.0225	0	5.31557	3.92839	3.67262	0	2.44036	3.70365	3.69962
chrIII:5501258-5501337	CELE1	NA	NA	NA	NA	NA	NA	NA	NA	-0.247224	-0.245026	-0.0468244	-0.24643	-0.0674595	-0.307945	-0.299673	-0.0426633	0	0	7.08881	0	5.82177	0	0	7.27725	11.898	11.885
chrIII:7221163-7221338	CELE1	NA	NA	NA	NA	NA	NA	NA	NA	0.143196	0.00752003	-0.551998	-0.172771	0.0638426	-0.932267	-1.0647	-0.696018	15.8428	12.2261	16.5982	8.5178	13.6751	10.1358	7.57166	13.9983	42.5444	16.3865
chrIII:7377093-7377297	CELE1	NA	NA	NA	NA	NA	NA	NA	NA	0	0.644892	-0.0295408	0.616917	0	0.558448	-0.354286	-0.0379601	0	10.7869	3.18471	9.99587	0	11.0041	0	3.05937	4.4368	0
chrIII:7893094-7893423	CELE1	0.98709	NA	1	NA	NA	NA	NA	NA	-0.552181	-0.710245	-0.311433	-1.11165	-1.06568	0.653175	0.324249	-0.128129	21.214	17.5686	5.67526	10.5508	11.7641	17.6474	12.4554	7.19306	11.1529	49.939
chrIII:8128653-8129015	CELE1	NA	NA	NA	NA	NA	NA	NA	NA	-0.799942	-0.540901	-0.551226	-0.797343	-0.470159	-0.557456	0.00109693	-0.551783	0	1.97594	0	0	2.56607	0	3.82598	0	5.01126	10.7385
chrIII:8369009-8369390	CELE1	NA	NA	NA	NA	NA	NA	NA	NA	0.196919	0	0	0	0.286674	0.27358	0.290566	0.255515	1.82049	0	0	0	2.64292	1.71725	1.81784	1.52403	0	0
chrIII:9538256-9538470	CELE1	NA	NA	NA	NA	NA	NA	NA	NA	0.823616	0.283246	-0.087641	0.84564	0.326015	-0.154568	0.212691	-0.0692237	12.9997	3.61294	5.2754	13.636	4.33248	4.39006	9.68951	5.62489	8.65759	0
chrIII:9598672-9599009	CELE1	NA	NA	NA	NA	NA	NA	NA	NA	0	0.444464	0.473012	0	0	0	0	0.2418	0	4.24417	3.86311	0	0	0	0	1.72243	0	0
chrIII:9724692-9724979	CELE1	NA	NA	NA	NA	NA	NA	NA	NA	-0.445125	-0.615173	-0.0281539	-0.865048	-0.415663	-0.0972261	-0.35227	0.224385	4.85234	2.69716	2.2669	0	5.25832	1.63865	0	4.35536	3.15814	16.507
chrIII:9836979-9837135	CELE1	NA	NA	1	NA	NA	NA	NA	NA	0.966564	0.31784	-0.167295	0.141904	0.726229	0.122589	0.0835172	-0.958543	53.1957	23.601	29.9896	17.8262	39.8084	41.2716	39.0911	11.6976	47.6931	18.7725
chrIII:9905920-9906002	CELE1	NA	NA	NA	NA	NA	NA	NA	NA	0.413781	0.00772874	-1.35632	0.230582	0.0797915	-1.38123	-0.407422	-0.470413	25.2156	8.64174	0	17.2605	11.6933	0	24.422	22.1268	56.3205	11.4555
chrIII:9919434-9919520	CELE1	NA	NA	NA	NA	NA	NA	NA	NA	0.431164	0	0.260834	0	0.178002	0	0	0.46056	16.0629	0	7.50421	0	5.80228	0	0	14.4177	0	0
chrIII:10080358-10080710	CELE1	NA	NA	NA	NA	NA	NA	NA	NA	-0.486366	-0.48087	0.263322	-0.484384	0.0287613	0.520721	0.298995	0.280509	0	0	1.60653	0	4.06879	3.71665	1.88755	1.77669	0	5.47657
chrIII:10212552-10212674	CELE1	NA	NA	NA	NA	NA	NA	NA	NA	0.471195	0.506442	-0.844738	0.255645	0.860131	-0.903214	-0.782676	0.0780806	11.3616	12.6306	4.61061	5.55326	23.3542	3.83684	5.41713	25.129	30.2664	0
chrIII:10260343-10260544	CELE1	NA	NA	NA	NA	NA	NA	NA	NA	0.204773	0.0162347	-0.368104	-0.00560696	-0.291624	-0.0371415	-0.356625	0.206056	6.91818	3.84546	0	3.38144	0	3.24747	0	5.98689	4.71206	4.70695
chrIII:10261143-10261362	CELE1	NA	NA	NA	NA	NA	NA	NA	NA	-0.239647	0.208363	0.286578	-0.51228	0.0120419	-0.312028	-0.275834	-0.637709	3.19112	10.0514	10.311	0	6.52855	2.98177	3.15643	0	8.46082	8.7874
chrIII:10416679-10416964	CELE1	NA	NA	NA	NA	NA	NA	NA	NA	-0.502808	-0.804742	-0.360855	-0.812825	-0.835022	0.365834	0.191983	0.627284	9.77254	5.22394	1.98288	5.24172	5.15853	8.8941	6.98923	13.0001	6.6562	27.4804
chrIII:10499109-10499494	CELE1	NA	NA	NA	NA	NA	NA	NA	NA	0.206945	0.413816	0.761149	-0.267777	0.0772965	0	0	0	3.63755	5.72879	4.85191	0	2.51435	0	0	0	0	2.54514
chrIII:10563710-10563909	CELE1	NA	NA	NA	NA	NA	NA	NA	NA	0	0.539732	0	0	0	0.225955	0.536846	0.266781	0	10.759	0	0	0	2.35966	6.66306	2.9109	0	0
chrIII:10567759-10567935	CELE1	NA	NA	NA	NA	NA	NA	NA	NA	-0.150042	0.254328	0.292545	0.318125	-0.443735	0.02162	-0.41621	0.0393459	23.7234	37.8161	27.57	40.4694	16.6705	19.7038	11.4521	21.0059	26.4102	38.1384
chrIII:10567996-10568199	CELE1	NA	NA	NA	NA	NA	NA	NA	NA	0.444732	0.482084	-0.414966	-0.424847	1.06205	-0.624307	0.243369	-0.128613	20.5511	21.3878	12.3809	3.67434	40.3434	9.64689	27.0942	17.564	27.1659	14.1374
chrIII:10603561-10603738	CELE1	NA	NA	NA	NA	NA	NA	NA	NA	-0.0113024	0.343521	0.0669327	-0.00288477	0.0561242	-0.544542	-0.239771	-0.108585	11.7579	21.4854	13.2257	11.8858	13.3021	3.68533	7.6445	9.81202	16.0422	16.0248
chrIII:10652700-10653040	CELE1	NA	NA	1	NA	NA	NA	NA	NA	0.304059	0.0161743	0.198551	-0.000583988	0.644782	0.134554	-0.019274	0.474969	10.2551	6.48479	10.4814	6.39937	15.3675	9.92305	8.14563	14.3179	10.9172	8.5503
chrIII:10771441-10771790	CELE1	0.98709	NA	1	NA	NA	NA	NA	NA	0.314194	0.138369	-0.502426	-0.195144	-0.236474	-0.95189	-0.410468	-0.84333	25.9814	21.6836	10.7019	14.8013	14.1996	5.91938	11.8239	7.03913	23.9925	24.7203
chrIII:10777685-10778034	CELE1	NA	NA	NA	NA	NA	NA	NA	NA	-0.0069505	-0.435706	-0.0254391	-0.205007	-0.120136	-0.0855793	-0.317844	-0.0462257	3.97386	0	1.86533	1.95157	2.77297	1.34837	0	1.66337	2.71953	5.43316
chrIII:10839117-10839444	CELE1	0.98709	0.983073	1	0.787718	0.982735	0.999728	0.910154	0.961998	-0.110754	-0.0780766	-0.170141	-0.341432	-0.0245539	0.247663	0.244157	0.213804	155.481	159.426	119.182	130.829	165.821	161.766	162.222	158.543	179.47	226.581
chrIII:10901931-10902208	CELE1	NA	NA	NA	NA	NA	NA	NA	NA	0.216249	0	1.72693	0.226036	0.16172	0	0	0.866349	2.52535	0	18.668	2.69628	1.81582	0	0	6.44436	0	0
chrIII:10930196-10930532	CELE1	NA	NA	NA	NA	NA	NA	NA	NA	0.476486	0	0	0.258719	0.510721	0.307705	0.324345	0	4.1468	0	0	2.02686	4.26196	1.94655	2.06058	0	0	0
chrIII:11034136-11034439	CELE1	NA	NA	NA	NA	NA	NA	NA	NA	0.754518	0.0197131	1.20213	0.511968	0.772359	0.524646	-0.0159472	0.441176	16.0349	4.91463	16.6165	11.672	16.0913	6.81507	2.1918	6.18919	2.99192	6.3593
chrIII:11077040-11077196	CELE1	NA	NA	NA	NA	NA	NA	NA	NA	NA	NA	0	NA	NA	0	0	0.395186	0	0	0	0	0	0	0	3.70815	0	0
chrIII:11105719-11105977	CELE1	NA	NA	NA	NA	NA	NA	NA	NA	-0.486616	-0.440316	0.376949	-0.305477	0.349978	-0.166229	-0.0200299	-0.321266	8.08069	8.76768	16.9828	10.8059	24.5834	8.70981	10.5075	6.74339	14.2103	22.3926
chrIII:11118418-11118674	CELE1	0.98709	NA	1	NA	NA	NA	NA	NA	-0.32658	-0.161879	-0.776056	0.0724916	-0.310608	-0.579876	-0.431864	-0.424199	21.7505	26.0446	16.4475	33.1875	22.2026	19.7954	23.4431	23.8784	47.3246	41.5572
chrIII:11158510-11158900	CELE1	NA	NA	NA	NA	NA	NA	NA	NA	-0.170081	0.621859	-0.556215	-0.329509	0.482286	-0.180908	0.460249	0.367376	7.1482	19.4099	3.12013	5.41092	16.2841	5.76941	12.2882	11.1131	9.52113	12.2395
chrIII:11256755-11257052	CELE1	NA	NA	NA	NA	NA	NA	NA	NA	-0.850912	-0.841161	0.552461	-0.585433	-0.203399	0.250229	0	0.561058	0	0	4.09386	2.29212	6.38263	1.58366	0	4.20921	0	13.0808
chrIII:11310609-11310950	CELE1	NA	NA	NA	NA	NA	NA	NA	NA	-0.34379	-0.504547	1.65093	-0.149021	0.258715	0.257842	-0.337254	0.537716	6.13895	4.36856	27.1299	8.57237	14.4176	6.05784	1.94826	8.77451	5.44263	14.178
chrIII:11448859-11449145	CELE1	NA	NA	NA	NA	NA	NA	NA	NA	-1.00965	-0.633827	-0.642348	-0.836185	-1.03329	0.033244	-0.170421	-0.14055	4.89231	10.6189	6.22675	7.13991	4.86838	15.0788	12.0978	12.3278	19.4569	33.9003
chrIII:11469348-11469681	CELE1	NA	NA	NA	NA	NA	NA	NA	NA	0.161687	-0.178867	0.754864	-0.431434	0.145927	0.744509	0.785115	0.904498	6.30581	2.3257	5.86407	0	5.92855	5.89212	6.06895	7.37633	0	5.69343
chrIII:11591527-11591594	CELE1	NA	NA	1	NA	NA	NA	NA	NA	0.144181	0.468018	0.158631	0.823292	-0.201524	-0.177451	-0.0410265	0.831969	41.0048	67.6643	62.162	104.361	22.2705	42.821	48.9931	123.83	68.7441	41.9472
chrIII:11612720-11613041	CELE1	NA	NA	NA	NA	NA	NA	NA	NA	0.196437	0.0169248	1.4514	-0.0056422	0.219748	0.195151	0.912967	0.816851	4.31941	2.41237	18.6773	2.12128	4.4605	4.07446	10.521	9.31951	2.95602	2.95281
chrIII:11613974-11614032	CELE1	NA	NA	NA	NA	NA	NA	NA	NA	NA	NA	0.742184	NA	NA	0	0	0	0	0	30.2894	0	0	0	0	0	0	0
chrIII:11621690-11621971	CELE1	NA	NA	NA	NA	NA	NA	NA	NA	0.113194	-0.475691	0.463438	-0.294408	-0.126637	-0.428222	-0.393999	-0.414306	14.8433	5.29804	6.33715	7.97411	10.4634	0	0	0	3.22533	16.9704
chrIII:11743484-11743647	CELE1	NA	NA	NA	NA	NA	NA	NA	NA	0.378204	3.60127e-05	0.526519	-0.26094	-0.295138	-0.163583	-0.0107065	-0.357135	12.7616	4.37357	18.8586	0	0	5.75526	8.29708	3.54988	11.092	5.9904
chrIII:11858638-11859012	CELE1	0.98709	NA	1	NA	NA	NA	NA	NA	0.146903	-0.0907231	-1.15454	-0.599372	0.17914	-0.362189	-1.63532	-1.4788	20.4698	15.3016	7.5614	7.46325	21.1215	18.3236	3.62859	5.01737	35.0841	23.2409
chrIII:11879240-11879323	CELE1	NA	NA	NA	NA	NA	NA	NA	NA	0	0	0	0	0.396367	0.410642	0	0	0	0	0	0	12.019	7.80939	0	0	0	0
chrIII:11890954-11891003	CELE1	NA	NA	NA	NA	NA	NA	NA	NA	NA	NA	0	NA	NA	0.267805	0.337538	0	0	0	0	0	0	9.43862	13.3261	0	0	0
chrIII:11927304-11927633	CELE1	NA	NA	NA	NA	NA	NA	NA	NA	-0.45542	-1.1178	0.400335	-0.635954	-0.362573	0.668658	-0.0150765	0.429165	6.38224	0	5.1555	4.34126	7.41175	7.70822	2.10429	5.56522	2.88435	17.479
chrIII:11934432-11934586	CELE1	NA	NA	NA	NA	NA	NA	NA	NA	-0.199869	-0.185496	-1.17955	-0.677132	-0.519671	-0.878151	-0.468753	-0.541007	9.01595	9.25503	0	0	3.00478	3.04472	8.77885	7.512	24.0178	18.8107
chrIII:11949494-11949657	CELE1	NA	NA	NA	NA	NA	NA	NA	NA	0	0.234069	0.701108	0	0.323497	0.276016	0	0	0	4.37357	11.9427	0	5.91793	3.99993	0	0	0	0
chrIII:11954539-11954679	CELE1	NA	NA	NA	NA	NA	NA	NA	NA	-0.00793691	0.356303	0.636577	-0.234807	-0.0869679	0.848915	0.692172	0.632929	4.97906	15.261	8.65228	0	3.30313	12.6518	9.65051	8.57696	0	6.96755
chrIII:11981101-11981234	CELE1	NA	NA	NA	NA	NA	NA	NA	NA	-0.0120836	-0.225904	0.215848	-0.512551	0.413289	0.0817969	-0.781251	-0.32641	10.4289	5.35272	27.3128	0	22.02	22.5048	5.1822	13.3696	28.0974	14.4271
chrIII:12047633-12047846	CELE1	NA	NA	NA	NA	NA	NA	NA	NA	0.629137	0.390233	0.579223	0.500294	0.664739	-0.176656	-0.229653	-0.323687	19.5907	13.9631	24.6517	16.27	20.1348	10.5413	9.60344	8.37164	17.1985	8.88601
chrIII:12074996-12075086	CELE1	NA	NA	NA	NA	NA	NA	NA	NA	-0.0106791	0.0230225	0.276304	-0.486269	-0.314515	0	0.291269	0.256164	15.3568	17.0721	7.17435	0	5.54724	0	7.63094	6.39758	0	21.2443
chrIII:12079971-12080195	CELE1	NA	NA	NA	NA	NA	NA	NA	NA	0.396818	0.0181487	0.29907	-0.00588217	0.233488	0.236436	0.310554	0.277862	9.30177	3.45237	2.90163	3.03578	6.38347	2.09747	2.96136	2.58747	0	4.22579
chrIII:12081133-12081292	CELE1	NA	NA	NA	NA	NA	NA	NA	NA	0.158533	0.0180665	-0.0759621	-0.456746	-0.500202	0.310917	-0.321609	0.155353	13.122	9.70978	7.62482	0	0	14.099	4.34009	11.1971	11.6336	12.2803
chrIII:12084276-12084359	CELE1	NA	NA	NA	NA	NA	NA	NA	NA	0.208984	0	0.792487	0.378955	0	0.309911	0	0	8.3577	0	23.3166	16.2631	0	7.80939	0	0	0	0
chrIII:12130545-12130699	CELE1	NA	NA	NA	NA	NA	NA	NA	NA	-0.010139	0.0277388	-0.279223	-0.39893	0.198183	-0.339791	-0.896554	-0.567423	13.5026	14.6505	8.42408	4.40678	19.2886	7.2769	0	4.04627	18.1498	18.4026
chrIII:12159551-12159696	CELE1	0.98709	0.956165	1	0.0798361	0.0353264	0.999728	0.910154	0.824349	0.856075	0.362384	-0.121895	1.39109	1.41235	0.384768	0.285657	0.455553	191.344	128.119	171.591	289.818	294.899	249.349	232.23	263.214	247.595	126.117
chrIII:12262548-12262699	CELE1	NA	NA	NA	NA	NA	NA	NA	NA	0.326625	0.183773	-0.0480341	0.0999196	0	-0.743479	-0.699117	0.353319	18.3007	9.4377	8.59034	4.93136	0	0	0	15.9125	12.2459	0
chrIII:12372818-12372960	CELE1	NA	NA	NA	NA	NA	NA	NA	NA	-0.483991	-0.450007	0.755911	-0.691938	-0.791429	0.236	0.331755	0.757483	9.81884	10.8641	13.0968	4.77658	3.53006	3.30022	4.85605	13.1574	0	33.9083
chrIII:12408009-12408177	CELE1	NA	NA	NA	NA	NA	NA	NA	NA	0.34551	-0.221853	-0.105365	0.36913	-0.355827	-0.416875	0.702051	-0.0992864	16.499	4.24417	6.7113	17.3476	2.98697	2.79249	23.9885	6.8897	11.2643	11.4392
chrIII:12408549-12408719	CELE1	NA	NA	NA	NA	NA	NA	NA	NA	-0.603274	-0.584152	0.0606137	-0.000199086	0.0288256	-0.191038	-0.217788	0.0551901	4.10554	4.19453	13.7671	16.7558	17.027	8.2795	8.12181	13.6182	16.6989	22.4259
chrIII:12424444-12424650	CELE1	NA	NA	1	NA	NA	NA	NA	NA	-0.2736	0.233485	0.857248	-0.114807	-0.42776	0.0975046	0.383948	0.562716	16.8617	31.7605	42.498	21.0839	13.6884	18.2389	26.2941	31.3718	22.3783	32.4583
chrIII:12444360-12444699	CELE1	NA	NA	NA	NA	NA	NA	NA	NA	-0.742306	-0.553799	-0.115241	-0.902038	-0.974545	-0.331241	0.268139	-0.755344	8.20095	10.7231	9.09649	6.22255	5.82393	7.17617	13.9661	3.42459	13.7488	28.3368
chrIII:12460095-12460246	CELE1	NA	NA	NA	NA	NA	NA	NA	NA	-0.247355	-0.313139	-0.561059	-0.117106	-0.5559	0.360215	0.591896	-0.110642	32.1569	29.8793	8.02612	37.2629	22.2195	27.2603	35.6235	16.2085	24.2136	57.1297
chrIII:12466032-12466184	CELE1	0.98709	0.726137	1	0.807221	0.57169	0.999728	0.95472	0.88722	-0.454758	-0.746363	-0.486359	-0.439616	-0.581091	0.109525	-0.229082	-0.487692	137.007	107.415	90.2958	137.844	123.824	144.51	111.629	90.4579	176.82	265.138
chrIII:12467573-12467895	CELE1	NA	NA	1	NA	NA	NA	NA	NA	-0.773518	0.126153	-0.181897	-0.106056	-1.04341	-0.88528	-1.07951	-0.496143	8.65308	25.3483	18.0885	19.8561	6.13046	8.44511	6.27563	13.3134	29.2068	29.8282
chrIII:12522892-12523200	CELE1	NA	NA	NA	NA	NA	NA	NA	NA	0.122955	0.15119	0.23494	-0.176207	0.66427	0.0222096	0.863019	-0.345635	11.3171	11.6062	9.454	6.84682	21.9863	7.30045	19.5889	3.91376	9.24114	12.6151
chrIII:12523772-12523995	CELE1	NA	NA	1	NA	NA	NA	NA	NA	0.763155	-0.110051	0.716195	-0.00498232	-0.203533	0.411472	0.740998	0.500499	43.671	16.8075	32.6778	19.1868	15.2519	24.3551	33.4733	26.3919	20.4911	25.8915
chrIII:12556902-12556985	CELE1	NA	NA	NA	NA	NA	NA	NA	NA	-0.184871	-0.577274	0.27929	-0.374791	0.465198	-0.381356	-0.261362	-0.997628	24.9155	8.53887	35.7982	16.2631	62.3849	13.4276	16.5337	0	32.9872	46.0293
chrIII:12579711-12579996	CELE1	NA	NA	NA	NA	NA	NA	NA	NA	-0.153609	-0.431712	0.979389	-0.288696	-0.847981	0.123094	-0.00802135	0.216407	12.2041	7.93996	13.0968	10.0183	3.53006	3.30022	2.42802	4.2285	3.18022	20.1681
chrIII:12652100-12652165	CELE1	NA	NA	NA	NA	NA	NA	NA	NA	0	0	0	0	0.271038	0	0	0.395186	0	0	0	0	7.64846	0	0	8.8209	0	0
chrIII:12653265-12653578	CELE1	0.98709	NA	1	NA	NA	0.999728	NA	NA	-0.709479	0.0957396	1.01985	-1.22999	-0.398475	0.590294	0.706613	0.825155	17.8444	39.9701	32.1746	8.91312	24.8515	20.7109	23.8791	26.5302	15.0219	49.1535
chrIII:12660654-12660698	CELE1	NA	NA	NA	NA	NA	NA	NA	NA	-0.218073	0.00766626	0.490024	0.00184024	-0.137734	0.227682	0.559839	0.270132	15.4539	31.8784	25.2047	31.8359	21.5676	10.4874	30.8629	12.9373	0	42.2579
chrIII:12661663-12661892	CELE1	NA	NA	NA	NA	NA	NA	NA	NA	-0.0222844	0.172459	0.347347	-0.184176	0.55969	-0.316445	-0.230357	0.0601696	12.1807	16.1103	18.3783	9.19856	25.4883	8.55638	8.93538	13.2429	16.1859	16.9482
chrIII:12684933-12685102	CELE1	NA	NA	NA	NA	NA	NA	NA	NA	-0.476441	0.00393091	-0.537483	0.346144	-0.135525	-0.893064	-0.236208	-0.541408	0	8.43841	7.1763	17.2456	5.93881	2.77607	11.9237	7.11383	22.1474	11.3719
chrIII:12732756-12732901	CELE1	NA	NA	NA	NA	NA	NA	NA	NA	-0.179169	-0.550706	0.953259	-0.152674	-0.360584	0.1062	0.260999	0.790988	14.3803	5.32043	25.6553	15.402	9.83755	6.46481	9.12749	20.8622	6.51943	26.6992
chrIII:12774032-12774384	CELE1	NA	NA	NA	NA	NA	NA	NA	NA	-0.186182	-0.402025	0.279372	-0.404301	-0.25407	0	0	0.27199	1.9888	0	1.84948	0	1.31938	0	0	1.77669	0	5.38699
chrIII:12777530-12777829	CELE1	NA	NA	NA	NA	NA	NA	NA	NA	-0.402159	-0.15615	1.38989	-0.401851	0.0712115	0	0.377413	0.331529	2.34016	5.17855	12.4856	2.27684	7.89255	0	2.22102	1.9406	0	9.61344
chrIII:12869620-12869895	CELE1	NA	NA	NA	NA	NA	NA	NA	NA	-0.19057	-0.630684	0.212667	-0.381439	-0.472878	-0.352971	-0.473217	-0.51708	5.06331	0	10.2736	2.71582	1.82898	3.41979	2.41415	2.10935	9.88635	10.6785
chrIII:12886576-12886794	CELE1	0.98709	NA	1	NA	NA	0.999728	0.73396	NA	0.473211	0.193171	0.226366	0.142858	-0.101508	0.42879	0.677641	-0.0325211	95.7778	75.0435	58.296	71.6542	57.7903	69.1091	83.9443	47.041	63.6494	84.9444
chrIII:12890311-12890484	CELE1	0.98709	NA	1	NA	NA	NA	NA	NA	0.214892	0.265944	-0.281084	0.748855	0.00308639	-0.206842	0.327964	-0.00572657	32.2019	34.0039	21.034	56.4872	25.4369	23.2169	39.2627	28.3183	37.5631	33.1498
chrIII:12890511-12890744	CELE1	NA	NA	NA	NA	NA	NA	NA	NA	-0.355115	0.0245687	0.7082	0.12071	-0.0884068	0.540046	-0.346538	0.404155	5.97211	12.7696	12.1176	14.5951	10.6194	9.64034	0	7.65612	3.88694	16.3882
chrIII:12916891-12917158	CELE1	NA	NA	NA	NA	NA	NA	NA	NA	0.252596	0.671038	0.602403	0	0.169639	0.274363	0	0.599275	2.61958	8.47324	4.55213	0	1.73784	1.76094	0	4.51251	0	0
chrIII:12917497-12917827	CELE1	NA	NA	NA	NA	NA	NA	NA	NA	0.452131	0.355268	-0.140219	-0.204167	-0.0734887	-1.06557	-0.42134	-0.660034	12.6859	11.1944	11.9932	4.32815	5.86429	1.98184	8.05204	5.27655	19.4906	8.71309
chrIII:12961639-12961850	CELE1	NA	NA	NA	NA	NA	NA	NA	NA	-0.746127	-0.482926	0.00886767	0.23525	-0.389617	-0.712277	-0.831792	0.349384	3.31154	7.32813	19.9388	23.1811	8.97181	8.41466	6.4185	28.3102	26.3403	22.8721
chrIII:12969063-12969119	CELE1	NA	NA	NA	NA	NA	NA	NA	NA	NA	NA	-0.0228763	NA	NA	-0.339349	-0.331993	-0.33647	0	0	11.4538	0	0	0	0	0	16.6989	0
chrIII:12974691-12974797	CELE1	NA	NA	NA	NA	NA	NA	NA	NA	-0.601919	0.159655	0.987708	-0.868006	-0.209916	1.37285	0.844466	0	6.56119	34.0733	24.4062	0	18.506	38.7249	19.4696	0	0	36.1351
chrIII:12981433-12981790	CELE1	NA	NA	NA	NA	NA	NA	NA	NA	0.322704	-0.454356	1.25067	-0.459082	-0.290695	-0.415218	-0.551147	-0.320966	7.8256	0	24.5728	0	1.41005	2.63649	1.86119	3.37808	7.62188	5.31175
chrIII:12982743-12983084	CELE1	NA	NA	NA	NA	NA	NA	NA	NA	-0.00668032	-0.221074	2.68274	-0.222799	-0.0704191	0.348538	0	0	2.05277	0	31.8537	0	1.36182	1.9181	0	0	0	2.87259
chrIII:12989713-12990058	CELE1	NA	NA	NA	NA	NA	NA	NA	NA	0	0.326125	0.505858	0	0	0	0	0.270846	0	2.07302	3.77379	0	0	0	0	1.81264	0	0
chrIII:12990569-12990685	CELE1	NA	NA	NA	NA	NA	NA	NA	NA	0	0.326125	1.13956	0	0	0.275029	0	0	0	6.13047	25.7013	0	0	4.0336	0	0	0	0
chrIII:12994503-12994669	CELE1	NA	NA	NA	NA	NA	NA	NA	NA	0	0.334987	0	0	0	0	0	0	0	4.65139	0	0	0	0	0	0	0	0
chrIII:13009003-13009151	CELE1	NA	NA	NA	NA	NA	NA	NA	NA	-0.328891	-0.324434	NA	-0.327286	-0.344888	NA	NA	NA	0	0	0	0	0	0	0	0	0	6.59346
chrIII:13072383-13072556	CELE1	NA	NA	1	NA	NA	NA	NA	NA	-0.0160831	0.336394	0.314813	0.452381	-0.566679	0.151591	-0.374347	-0.142351	11.9901	21.2952	33.578	25.0826	2.90114	28.6414	15.3174	20.5923	32.3358	16.5749
chrIII:13097655-13097825	CELE1	NA	NA	NA	NA	NA	NA	NA	NA	0.0865061	-0.10862	0.578037	-0.002524	-0.541872	0.681773	-0.0302666	-0.360825	32.6894	25.5152	25.7225	29.5171	14.5318	28.0676	11.854	6.80912	16.4516	39.6615
chrIII:13115117-13115231	CELE1	NA	NA	NA	NA	NA	NA	NA	NA	0.421685	0	-0.293747	0	0.323771	-1.07613	-1.04904	-1.06531	12.0944	0	14.794	0	8.43948	0	0	0	32.7396	0
chrIII:13125514-13125755	CELE1	NA	NA	NA	NA	NA	NA	NA	NA	-0.220843	0.0140039	0.39783	-0.219839	-0.0665699	-0.044946	-0.0112215	0.38835	0	3.20984	7.38461	0	1.92455	2.7107	2.75333	7.2171	3.75845	3.92894
chrIII:13139551-13139737	CELE1	NA	NA	NA	NA	NA	NA	NA	NA	-0.231081	-0.492038	0.175091	-0.0020619	-0.325775	-0.325536	-0.310536	-0.0263718	3.75426	0	6.06529	7.66106	2.4906	0	0	3.35386	4.86387	10.3381
chrIII:13181833-13181973	CELE1	NA	NA	NA	NA	NA	NA	NA	NA	-0.250432	0.0105685	-0.304108	-0.248878	0.0885362	0.208935	-0.29769	-0.0365854	0	5.50909	0	0	6.88326	9.30481	0	4.12893	6.45067	6.96755
chrIII:13183595-13183716	CELE1	NA	NA	NA	NA	NA	NA	NA	NA	-0.00790261	-0.231604	-0.329152	-0.232969	-0.244775	-0.40077	-0.669026	-0.0751921	5.70021	0	5.35136	0	0	3.86829	0	9.91272	15.6039	8.05266
chrIII:13203519-13203632	CELE1	NA	NA	NA	NA	NA	NA	NA	NA	-0.24807	0.00525535	0.321721	0.216532	0.223062	0.273746	1.109	0.325315	0	6.2918	4.97461	13.1503	12.599	4.13975	23.8723	5.10684	0	8.34038
chrIII:13216181-13216533	CELE1	NA	NA	NA	NA	NA	NA	NA	NA	-0.00545122	-0.251084	0.208825	-0.255737	0.601816	-0.434847	0.730989	0.227355	1.97004	0	3.21306	0	8.35886	0	7.7891	3.42592	2.57661	2.69349
chrIII:13226530-13226898	CELE1	NA	NA	NA	NA	NA	NA	NA	NA	-0.230456	0.35151	0.432441	-0.216227	-0.00198338	0.700574	0.649326	0.200543	1.88462	7.93652	5.30785	2.03134	3.89236	7.89114	7.29901	3.3993	2.5795	5.3248
chrIII:13260845-13261060	CELE1	NA	NA	1	NA	NA	NA	NA	NA	-0.286725	-0.242543	0.0426408	-0.265789	-0.845336	-0.646807	0.304337	0.574509	16.1898	17.1544	13.5245	16.7352	6.83027	4.36973	18.6386	24.8824	17.0392	31.2523
chrIII:13274196-13274343	CELE1	NA	NA	NA	NA	NA	NA	NA	NA	0.505079	0.532918	-0.288759	0.708657	0.683733	-0.575578	-0.559468	-0.284684	9.44238	10.0949	3.83179	14.2951	13.3793	0	0	3.93365	12.2911	0
chrIII:13317794-13317919	CELE1	NA	NA	NA	NA	NA	NA	NA	NA	-0.17255	-0.755176	0.72363	0.372179	-0.938091	0.6899	0	0.303225	22.1296	5.69258	13.5025	45.4799	3.69636	12.6972	0	4.97755	0	38.2322
chrIII:13355703-13356029	CELE1	0.98709	0.97982	1	0.844085	0.97327	0.999728	0.784198	0.93105	-0.372207	-0.184861	-0.410194	-0.379407	-0.043892	-0.122006	-0.549823	0.371091	68.2969	79.3196	41.4617	68.0086	88.8015	52.3744	37.2791	77.3896	76.9107	123.475
chrIII:13389935-13390117	CELE1	NA	NA	NA	NA	NA	NA	NA	NA	-0.603618	-0.396301	0.0952162	-0.252821	-0.412004	0.183882	0.184237	0.768361	11.4366	16.0032	13.333	20.1165	15.9105	14.9059	15.0249	28.8776	15.3728	37.0607
chrIII:13432337-13432455	CELE1	NA	NA	NA	NA	NA	NA	NA	NA	-0.571731	-0.143139	-0.329172	-0.570125	-0.594688	-0.0867886	-0.321658	-0.0336976	0	13.0552	0	0	0	3.96581	0	5.27035	7.99863	24.767
chrIII:13639133-13639495	CELE1	0.98709	NA	1	NA	NA	NA	NA	NA	0.177821	-0.306652	-0.11682	-0.445926	-0.257883	0.721527	-0.372339	0.608124	32.7141	20.2512	10.5549	17.4849	21.6045	23.8437	7.57452	21.5931	15.6163	37.1057
chrIII:13752545-13752714	CELE1	NA	NA	NA	NA	NA	NA	NA	NA	0.171956	0.361815	1.02555	-0.46544	-0.00474918	1.02815	0.375989	0	12.3501	17.577	13.8481	0	8.21897	14.3523	4.08479	0	0	11.1859
chrIII:13754903-13755080	CELE1	NA	NA	NA	NA	NA	NA	NA	NA	0.199871	0.012045	0.293739	-0.0102648	-0.0987336	0	0.612847	0.760303	7.85097	4.36394	3.18598	3.83737	2.61653	0	7.80242	10.0648	0	5.51924
chrIV:181396-181762	CELE1	NA	NA	NA	NA	NA	NA	NA	NA	0.164448	0.180472	0.625085	0.178953	-0.145218	0.445389	0.498964	0.781195	5.7388	5.8632	6.64834	5.946	2.64452	5.36231	5.52324	8.17679	2.59356	5.18149
chrIV:184949-185247	CELE1	NA	NA	NA	NA	NA	NA	NA	NA	-0.278895	0.605233	-0.0913714	-0.0104717	0.378318	-0.333484	-0.0228981	-0.0847383	0	10.1927	3.79334	2.28445	6.49191	2.19394	4.4569	3.89418	6.22535	3.2857
chrIV:244126-244493	CELE1	0.98709	NA	1	NA	NA	NA	NA	NA	0.191114	-0.317248	-0.85358	-0.351616	-0.248047	0.127106	0.331908	0.493715	30.4158	18.3505	4.62314	17.7895	19.8331	15.325	18.4881	21.422	17.6459	33.9319
chrIV:259584-259910	CELE1	NA	NA	NA	NA	NA	NA	NA	NA	-0.248327	0.218272	-0.0177529	-0.247039	-0.267068	-0.32639	-0.000221515	-0.0254364	0	4.56895	1.99653	0	0	0	2.12359	1.91796	2.78148	2.90766
chrIV:437802-437986	CELE1	NA	NA	1	NA	NA	NA	NA	NA	-0.135652	-0.531682	0.792522	-0.402937	-0.008049	1.17885	0.434451	0.510804	22.6259	11.6313	21.9216	14.7687	26.6531	33.0353	14.7105	16.221	10.0615	36.4891
chrIV:454471-454820	CELE1	NA	NA	NA	NA	NA	NA	NA	NA	0.218853	-0.278724	0.173923	0.227735	0.0871297	-0.022797	-0.30845	-0.0393199	3.99278	0	3.2406	4.09319	2.77297	1.87425	0	1.66337	2.5987	2.80693
chrIV:514737-515004	CELE1	NA	NA	NA	NA	NA	NA	NA	NA	-0.495715	0.194615	-0.0532691	-0.00625352	-0.324841	-0.404672	0.280649	0.230667	0	8.25116	2.11606	5.34559	1.88358	0	5.07732	4.51251	3.39382	7.33153
chrIV:515064-515211	CELE1	NA	NA	NA	NA	NA	NA	NA	NA	-0.600662	-0.257923	-0.322505	-0.590053	-0.146693	-0.156394	-0.653015	0.497474	9.44238	19.3855	4.41126	9.67985	23.3478	6.37745	0	20.2762	12.2911	39.828
chrIV:652425-652570	CELE1	NA	NA	NA	NA	NA	NA	NA	NA	0.203597	0.00234747	0.143921	0.211364	0.230672	0.126462	-0.301968	-0.346404	9.61708	4.91277	12.2402	9.81245	10.1051	12.2186	4.75627	4.2957	12.7492	6.72894
chrIV:659148-659499	CELE1	NA	NA	NA	NA	NA	NA	NA	NA	-0.137774	-0.870252	-0.425553	-0.122172	-0.235666	-0.504274	-0.331432	-1.05854	13.9047	4.41353	8.54275	14.1503	12.241	7.74935	9.62429	3.30784	18.448	21.9685
chrIV:815453-815784	CELE1	0.98709	NA	1	NA	NA	0.999728	NA	NA	0.13554	-0.511991	0.16849	-0.194173	0.312034	0.0996401	-0.562714	-0.262886	27.3701	12.9626	38.8708	19.3178	32.2741	36.5748	20.4081	26.8454	45.1073	31.9788
chrIV:815822-815888	CELE1	NA	NA	1	NA	NA	NA	NA	NA	-0.871061	-0.847265	0.335809	-0.673568	-0.377536	0.440345	-0.577523	-0.293602	20.8578	21.4109	89.7626	31.5771	50.9913	97.063	29.8346	44.7893	83.9767	114.001
chrIV:1502577-1502710	CELE1	NA	NA	NA	NA	NA	NA	NA	NA	0.531933	0.215707	-0.0875081	0.378784	0.499518	-0.652326	-0.0381823	0.0852573	15.5692	5.35272	13.9764	10.1948	13.9027	3.52187	14.9173	18.05	21.3098	0
chrIV:1576233-1576594	CELE1	NA	NA	1	NA	NA	NA	NA	NA	-0.0263196	0.159424	-0.268244	0.317459	0.0932451	-0.63123	-0.602809	0.155425	11.5813	14.6918	13.4803	17.3494	13.5131	9.3474	9.35842	20.1688	23.0803	16.1086
chrIV:1600986-1601061	CELE1	NA	NA	NA	NA	NA	NA	NA	NA	-0.183927	-0.160403	-0.0335766	-0.628415	-0.0217263	-0.365656	-0.613531	-0.318106	18.4749	19.6585	17.1807	0	26.5683	6.20962	0	7.66026	23.9354	37.9478
chrIV:1609130-1609467	CELE1	0.98709	NA	1	NA	NA	NA	NA	NA	-0.700656	-0.539511	-0.628973	-0.0846605	-0.461439	-0.596437	-0.149907	-0.16762	16.5185	19.627	12.2522	31.1001	21.5934	12.8036	19.8795	19.6122	30.4764	45.4762
chrIV:1652146-1652314	CELE1	NA	NA	1	NA	NA	NA	NA	NA	0.761863	0.928837	0.14323	1.18497	1.06078	-0.180233	-0.592845	-0.537867	28.9222	35.0099	42.8051	46.0333	39.9688	32.7561	20.0459	21.734	49.6885	11.6263
chrIV:1733493-1733741	CELE1	0.98709	NA	1	NA	NA	0.979547	0.864765	NA	-0.0370956	-0.255659	-0.546344	0.25125	-0.187484	-0.888507	-0.461032	-0.506616	61.7623	50.6431	58.4494	78.6789	54.098	42.7582	62.5624	60.2587	119.777	85.7847
chrIV:1848779-1848879	CELE1	0.98709	NA	1	NA	NA	0.638786	NA	NA	0.217485	0.15621	-0.86349	0.711651	0.256509	-1.50258	-0.772577	-0.221462	55.411	51.4793	55.6288	93.186	58.0426	27.0076	59.9305	101.109	162.934	57.4226
chrIV:1848911-1849046	CELE1	0.98709	NA	1	NA	NA	0.959337	NA	NA	0.0882156	0.027943	1.53047	0.308669	0.530529	1.20115	1.72244	1.43007	41.1508	38.2309	63.4232	52.1807	65.0885	45.7011	74.9365	57.6345	13.3756	49.8685
chrIV:1940929-1941283	CELE1	NA	NA	1	NA	NA	NA	NA	NA	0.491729	0.53455	-0.473339	0.870424	0.750938	0.252292	-0.372791	0.235929	9.86933	10.4376	6.6315	15.9548	13.6696	15.3677	7.58686	15.1397	15.73	5.53479
chrIV:1977617-1977785	CELE1	NA	NA	1	NA	NA	NA	NA	NA	-0.700252	-0.40327	0.122761	-0.696164	0.318099	1.00452	1.10267	0.0775753	0	4.59634	15.4524	0	20.2155	40.0445	44.367	14.0456	16.6463	17.0653
chrIV:2190725-2190818	CELE1	NA	NA	NA	NA	NA	NA	NA	NA	0.162203	0.196434	-0.328722	-0.46488	0.462595	-0.172027	0.168202	-0.0953041	22.4058	24.1578	12.9784	0	36.7604	17.0197	28.3535	19.5375	29.9278	20.9027
chrIV:2209912-2210231	CELE1	NA	NA	NA	NA	NA	NA	NA	NA	0.461875	0.48565	-0.111905	-0.0135412	0.359447	-0.0426766	0.513794	-0.112656	10.9074	11.2073	5.58461	4.26907	9.22087	5.89914	12.7568	5.59853	8.79131	6.04134
chrIV:2287578-2287819	CELE1	NA	NA	NA	NA	NA	NA	NA	NA	-0.348433	-0.797112	0.169916	-0.350602	-0.317687	0.328112	0.233788	0.373899	5.77468	0	4.68682	5.64505	6.25783	6.61096	5.50666	7.2171	3.93321	15.9771
chrIV:2545648-2545761	CELE1	NA	NA	NA	NA	NA	NA	NA	NA	0.213734	0.419405	0.301245	0	0	0	0	0.30586	6.15831	13.6278	4.97461	0	0	0	0	5.10684	0	0
chrIV:2685748-2686056	CELE1	NA	NA	NA	NA	NA	NA	NA	NA	-0.144767	0.210074	-0.127802	-0.0163107	-0.65401	0.140463	-0.665631	0.176541	13.5891	21.2764	9.73154	16.1194	6.15542	12.8139	4.40363	13.9166	15.1282	22.2556
chrIV:2687132-2687487	CELE1	NA	NA	NA	NA	NA	NA	NA	NA	-0.601754	-0.553956	-0.973381	0.0688619	-1.00538	-0.619555	-0.305576	-0.140533	9.78581	10.4083	3.42688	21.666	5.56218	6.33663	9.51615	11.4474	18.0031	27.2409
chrIV:2984803-2985160	CELE1	NA	NA	NA	NA	NA	NA	NA	NA	0	0	0.587693	0	0.271038	0.32047	0.630179	0.30966	0	0	3.40774	0	1.41005	1.83237	3.72238	1.6262	0	0
chrIV:3003233-3003526	CELE1	NA	NA	NA	NA	NA	NA	NA	NA	-0.449527	-0.244847	0.221689	-0.291296	-0.577323	0.0138	-1.1435	-0.545592	4.77583	7.92635	12.7404	6.96991	3.434	9.90418	0	4.11344	12.9502	16.4928
chrIV:3100321-3100670	CELE1	NA	NA	NA	NA	NA	NA	NA	NA	0.17874	-0.229324	0	-0.0097763	-0.0821719	0.339819	0	0.832617	3.97386	0	0	1.95157	1.33069	1.87425	0	5.24721	0	2.80693
chrIV:3133764-3134062	CELE1	NA	NA	NA	NA	NA	NA	NA	NA	0.154283	0.187495	-0.506092	-0.718928	0.497592	-0.326475	-0.0195125	0.516462	9.34764	9.79457	5.97684	0	14.5415	8.16019	11.4243	20.0728	15.3512	9.75135
chrIV:3224031-3224422	CELE1	NA	NA	1	NA	NA	NA	NA	NA	0.0925114	0.138051	0.0882301	0.116234	0.25957	0.378195	0.924784	0.691434	12.4521	13.112	6.22434	12.8761	15.2537	9.10158	15.6564	12.3403	7.17658	14.8758
chrIV:3237184-3237309	CELE1	NA	NA	1	NA	NA	NA	NA	NA	0.323546	-0.435267	-0.269957	0.244858	0.463207	-0.252165	0.266559	-0.398548	49.936	18.0225	38.7292	46.0078	56.9953	39.5525	64.3501	34.1287	66.6457	45.7783
chrIV:3237547-3237721	CELE1	NA	NA	NA	NA	NA	NA	NA	NA	0.400868	-0.257799	-0.342813	0.233945	0.894362	-0.389251	-0.00822501	0.15351	11.9973	0	3.2406	8.56647	24.8452	2.69675	7.77555	10.2373	10.3948	5.43316
chrIV:3239738-3239879	CELE1	NA	NA	NA	NA	NA	NA	NA	NA	-0.774522	0.166747	-0.876092	-0.165888	0.253021	-0.401124	-0.800835	0.366718	4.94399	31.5644	3.9937	19.7093	34.1739	11.2666	4.89025	29.9664	26.2166	33.9244
chrIV:3260197-3260440	CELE1	NA	NA	NA	NA	NA	NA	NA	NA	-0.504313	-0.496568	-0.0677049	0.183125	-0.326257	0.152394	0.38258	-0.622826	0	0	4.99988	8.67077	1.90878	8.06544	11.3839	0	7.62861	7.92307
chrIV:3268632-3268777	CELE1	NA	NA	NA	NA	NA	NA	NA	NA	NA	NA	0	NA	NA	0	0	0	0	0	0	0	0	0	0	0	0	0
chrIV:3293727-3294051	CELE1	NA	NA	NA	NA	NA	NA	NA	NA	-0.354136	-0.950262	-0.791064	-0.79368	-0.602465	-1.41033	-1.27443	-0.435702	12.8997	4.7802	5.76257	6.50975	9.19918	1.4521	2.13666	9.09505	20.1107	26.7191
chrIV:3720034-3720310	CELE1	NA	NA	NA	NA	NA	NA	NA	NA	-0.0214038	-0.306192	0.583492	-0.0176311	-0.036227	-0.163366	0.536979	0.0883035	12.6245	7.76821	15.5696	12.5696	12.3336	6.4401	14.8385	8.73178	10.156	17.505
chrIV:4151452-4151849	CELE1	NA	NA	NA	NA	NA	NA	NA	NA	0.179957	-0.217963	0.646211	-0.220256	-0.0609122	0.125876	0.27689	-0.0722013	3.52787	0	6.13051	0	1.26834	2.37151	3.4189	1.46276	2.39155	2.38895
chrIV:4356013-4356299	CELE1	NA	NA	NA	NA	NA	NA	NA	NA	-0.235527	0.190952	0.245652	0.00293667	-0.0830664	0.213759	0	0	0	4.99836	1.97598	2.61173	1.62279	1.64436	0	0	0	3.42308
chrIV:4425765-4425959	CELE1	NA	NA	NA	NA	NA	NA	NA	NA	0.44878	0.263965	0	0	0.169222	0.265548	0.342992	0	7.16653	3.9835	0	0	2.38842	2.42016	3.5611	0	0	0
chrIV:4453924-4454067	CELE1	NA	NA	NA	NA	NA	NA	NA	NA	-0.882077	-1.07765	-0.739864	-0.860133	-0.88146	-0.372228	0.232101	-0.375962	9.70467	5.39432	0	10.4106	9.97418	4.55548	14.2718	4.04291	12.9263	53.2616
chrIV:4695256-4695356	CELE1	NA	NA	NA	NA	NA	NA	NA	NA	0	0.222272	-0.026198	0.226755	0.162203	-0.335981	-0.0162261	-0.330725	0	7.10163	6.46402	7.42145	4.998	0	6.59709	0	9.42413	0
chrIV:5210709-5210918	CELE1	0.98709	NA	1	NA	NA	0.999728	NA	NA	-0.286002	-0.45872	0.0379091	-0.750005	-0.133397	-0.657709	-0.194077	-0.11221	49.957	41.8368	55.3934	31.4908	57.3053	28.7204	45.2235	48.4143	70.9097	87.6814
chrIV:5359425-5359766	CELE1	0.98709	NA	1	NA	NA	0.999728	0.994585	NA	-0.290094	-0.544633	0.339588	-0.18133	0.337332	-0.122271	0.0303043	-0.332478	20.3922	15.377	46.1224	22.7474	37.3487	31.3656	35.9728	26.4551	46.3242	36.7889
chrIV:5375276-5375575	CELE1	0.98709	0.929142	0.158031	0.294378	0.370567	0.999728	0.441321	NA	-0.9171	-0.447381	2.11594	-1.15026	-0.852142	0.421572	1.17265	0.309378	44.1981	65.9426	100.235	35.7046	47.1047	24.4776	47.2973	22.6963	21.5046	128.566
chrIV:5433083-5433412	CELE1	NA	NA	NA	NA	NA	NA	NA	NA	-0.218145	-0.197075	-0.0535629	-0.466842	-0.300424	0.223452	0.255728	-0.359985	2.10735	2.35389	1.7185	0	1.41134	3.97569	4.1234	0	2.75619	5.85827
chrIV:5535270-5535583	CELE1	0.98709	NA	1	NA	NA	NA	NA	NA	0.434307	-0.216043	-0.408145	0.445075	-0.171628	-0.487825	-0.461295	0.172875	28.9602	14.0848	11.6558	29.1265	15.2057	10.7763	10.968	21.1113	23.7119	24.6271
chrIV:5851143-5851460	CELE1	NA	NA	NA	NA	NA	NA	NA	NA	-0.686487	-0.406805	0.641117	-0.182043	0.392047	-0.0548316	-0.00514313	0.202868	0	2.25555	7.94246	4.71425	12.2081	2.06286	2.1837	3.66151	2.8602	9.16872
chrIV:6116563-6116736	CELE1	NA	NA	NA	NA	NA	NA	NA	NA	-0.328891	-0.324434	NA	-0.327286	-0.344888	NA	NA	NA	0	0	0	0	0	0	0	0	0	5.64612
chrIV:6353545-6353861	CELE1	NA	NA	NA	NA	NA	NA	NA	NA	-0.804131	-0.563518	0.442842	-1.02056	-0.388481	0.607768	0.374259	-0.106622	4.40843	7.1635	11.5455	2.36456	9.30813	13.6518	10.6869	5.79345	8.74109	21.2949
chrIV:8020230-8020613	CELE1	NA	NA	NA	NA	NA	NA	NA	NA	0	0	0.312167	0.443001	0	0	0.319421	0	0	0	1.70017	3.73077	0	0	1.73517	0	0	0
chrIV:8119845-8120042	CELE1	NA	NA	NA	NA	NA	NA	NA	NA	0	0.334987	0.270482	0	0	0.21443	0	0.250613	0	3.92314	3.2973	0	0	2.38349	0	2.9403	0	0
chrIV:10166786-10166940	CELE1	NA	NA	NA	NA	NA	NA	NA	NA	-0.418409	0.00693632	-0.0733335	-0.00622692	-0.049055	0.400442	0.25521	0.191885	4.48662	13.8825	3.65874	13.6495	12.5231	11.5091	8.5975	7.512	6.14088	18.6067
chrIV:11346821-11346983	CELE1	NA	NA	NA	NA	NA	NA	NA	NA	-0.379564	0.176551	-0.127465	0.4052	0.119912	-0.366173	-0.208661	-0.515779	8.61407	22.7323	18.4481	30.5577	20.9596	13.8395	16.8684	10.991	28.6785	23.5266
chrIV:11861301-11861631	CELE1	NA	NA	NA	NA	NA	NA	NA	NA	-0.740737	-0.307661	0.178614	-0.313438	0.163297	-0.125794	-0.294981	1.00899	2.12099	6.50089	5.91721	6.5927	13.2537	3.40761	2.09793	16.5093	5.49573	14.6492
chrIV:12101289-12101530	CELE1	NA	NA	NA	NA	NA	NA	NA	NA	-0.0177524	0.186315	0.513461	-0.179712	-0.390669	-0.440141	0.232777	-0.748165	11.5767	15.8033	12.0714	8.74243	6.09644	1.95013	8.4923	0	7.69166	15.9771
chrIV:12512463-12512775	CELE1	NA	NA	NA	NA	NA	NA	NA	NA	-0.214946	-0.452579	0.20965	-0.203692	-0.12653	0.771375	0.256401	-0.0547258	2.24296	0	3.89767	2.39478	3.10077	9.89101	4.25755	2.00374	3.04101	6.27748
chrIV:12654048-12654311	CELE1	NA	NA	NA	NA	NA	NA	NA	NA	0.24409	0.634466	-0.0454072	0.455427	0	-0.0829574	-0.000720521	-0.33416	2.65927	8.15074	2.14812	5.42658	0	1.78762	2.63036	0	3.44524	0
chrIV:12654956-12655162	CELE1	NA	NA	NA	NA	NA	NA	NA	NA	0.181823	-0.225352	0.984243	-0.510304	0.0205812	0	0.643865	0	10.1426	3.46505	11.3729	0	7.12724	0	6.57353	0	0	9.33927
chrIV:12664231-12664411	CELE1	NA	NA	NA	NA	NA	NA	NA	NA	0.158953	-0.192292	-0.0372802	-0.216818	0.533852	0.320694	-0.0123401	-0.0592852	11.6361	4.29161	3.60699	3.77376	21.4484	7.82206	3.68125	3.21646	5.0251	10.8555
chrIV:12705953-12706303	CELE1	NA	NA	NA	NA	NA	NA	NA	NA	-0.252187	-0.0951738	0.465972	-0.66142	0.208923	0.00719894	0.397924	0.891225	11.9253	14.474	8.32275	6.40655	20.4599	4.0336	7.67332	14.0381	5.42357	22.0311
chrIV:13151460-13151785	CELE1	0.98709	NA	1	NA	NA	NA	NA	NA	-0.346023	0.0242861	-0.14744	0.239292	-0.560032	0.103434	-0.316209	-0.287847	14.9731	22.5497	14.969	28.0544	11.7887	19.3116	12.522	12.9148	22.9688	29.6507
chrIV:13178605-13178658	CELE1	NA	NA	NA	NA	NA	NA	NA	NA	NA	NA	0	NA	NA	0.258675	0	0.459505	0	0	0	0	0	12.1479	0	23.2286	0	0
chrIV:13202852-13203161	CELE1	0.98709	0.999604	1	0.974418	0.247492	0.999728	0.979137	NA	-0.772563	0.00415274	-0.464548	-0.0830716	-0.949869	-0.67462	-0.149668	-0.138794	51.8524	98.1279	35.6952	91.3541	44.8293	29.4425	46.4063	46.6685	69.3923	131.675
chrIV:13204644-13204934	CELE1	NA	NA	NA	NA	NA	NA	NA	NA	0.202552	0.00231935	-0.820034	0.199992	0.231033	-0.190472	-1.13788	-0.538461	4.80231	2.46483	1.94881	4.69451	5.06989	7.11953	0	4.00124	12.793	3.37603
chrIV:13273039-13273336	CELE1	0.98709	NA	1	NA	NA	NA	NA	NA	0.382565	0.605976	0.194811	0.211917	0.0469392	0.304195	0.243767	-0.994525	25.8256	32.2887	28.3692	21.5219	18.2403	31.2458	29.8217	8.26743	31.657	22.7588
chrIV:13356776-13357114	CELE1	NA	NA	NA	NA	NA	NA	NA	NA	0.243977	1.17189	-0.439683	0.243813	0.481294	0.190159	0.298446	0.671381	2.07093	14.9863	0	2.0149	4.46724	3.3272	4.01393	7.0021	2.68302	0
chrIV:13382593-13382736	CELE1	NA	NA	NA	NA	NA	NA	NA	NA	-0.543492	0.176607	0.651543	-0.318199	0.376633	-0.343937	-0.655962	-0.0807886	4.87533	26.5583	25.4161	10.4106	33.9705	4.55548	0	8.08583	12.6326	26.4112
chrIV:13402750-13402870	CELE1	0.98709	0.913706	1	0.945256	0.663446	0.999728	0.355953	0.979235	-0.0274155	0.230111	-0.569534	0.0926007	-0.244626	-0.127982	-0.509686	-0.0799906	1143.44	1375.02	812.422	1243.48	978.214	1112.24	847.303	1151.61	1611.93	1565.49
chrIV:13405785-13406361	CELE1	0.98709	NA	1	NA	NA	0.999728	NA	NA	-0.687173	-0.9593	-0.487558	-0.00985289	-0.0966899	0.372238	-1.38002	0.101742	16.9308	12.8435	14.3544	31.0935	28.7301	29.8209	5.92003	23.8303	29.1803	42.1276
chrIV:13428449-13428671	CELE1	0.98709	NA	1	NA	NA	0.999728	NA	NA	-0.175591	-0.359938	-0.495277	0.0627967	-0.34685	-0.28685	-0.948964	-0.246947	40.8374	34.0326	41.9919	51.3943	34.4673	49.754	27.5215	51.2168	83.47	64.948
chrIV:13509599-13509944	CELE1	NA	NA	NA	NA	NA	NA	NA	NA	-0.421517	0.00422119	0.0995967	0.000156699	0.284996	-0.577238	-0.532729	-0.297187	2.02904	6.21906	7.05185	6.30689	9.76116	1.89592	1.92574	3.62527	8.13069	8.42674
chrIV:13515915-13516252	CELE1	0.98709	NA	1	NA	NA	0.999728	NA	NA	-0.0251468	-0.49392	-0.0774093	-0.777044	-0.148467	-0.811505	-0.623034	-0.753012	28.9417	17.8571	27.1972	12.7155	25.3806	13.8927	16.3527	14.3119	38.5493	39.7566
chrIV:13533933-13534099	CELE1	0.98709	NA	1	NA	NA	NA	NA	NA	0.068854	-0.564993	-0.0140775	0.0859612	-0.243901	-0.553292	-0.507181	0.558896	41.7216	18.6056	28.7073	42.4944	29.0581	15.2318	16.4644	50.1526	38.6311	51.809
chrIV:14901653-14901724	CELE1	NA	NA	NA	NA	NA	NA	NA	NA	NA	NA	-0.341002	NA	NA	-0.344189	-0.336776	-0.341283	0	0	0	0	0	0	0	0	13.22	0
chrIV:16442970-16443083	CELE1	NA	NA	NA	NA	NA	NA	NA	NA	NA	NA	NA	NA	NA	NA	NA	NA	0	0	0	0	0	0	0	0	0	0
chrIV:16490793-16490940	CELE1	0.98709	NA	1	NA	NA	NA	NA	NA	-0.657607	-0.144248	0.219494	-0.934294	-0.300144	0.0877586	-0.520612	0.100822	28.2824	50.4746	41.2152	19.3597	42.4931	35.6181	18.5781	36.6188	43.8763	78.1605
chrIV:16843119-16843232	CELE1	NA	NA	NA	NA	NA	NA	NA	NA	-0.00205078	-0.228075	-0.027369	-0.229443	-0.241279	-0.335323	-0.0164305	0.174323	6.15831	0	5.72689	0	0	0	5.84479	10.2137	8.34945	8.34038
chrIV:17053996-17054111	CELE1	NA	NA	NA	NA	NA	NA	NA	NA	0	0	0	0	0.261956	0.313235	0	0.307142	0	0	0	0	4.01501	5.65508	0	5.40665	0	0
chrIV:17054552-17054617	CELE1	NA	NA	NA	NA	NA	NA	NA	NA	NA	NA	NA	NA	NA	NA	NA	NA	0	0	0	0	0	0	0	0	0	0
chrIV:17136061-17136163	CELE1	NA	NA	NA	NA	NA	NA	NA	NA	-0.267465	0.0167582	-0.286073	0.56544	-0.306883	-0.292588	-0.264868	-0.598739	0	7.54157	6.3385	27.8178	0	6.36882	6.74189	0	18.4823	9.2311
chrIV:203262-203595	CELE1	0.98709	NA	1	NA	NA	0.999728	NA	NA	0.237698	-0.408418	-0.558273	-0.0919653	0.371457	0.737163	0.659079	0.149554	37.597	20.0403	10.7011	27.5816	42.0758	36.3558	34.5029	22.129	25.2684	40.6114
chrIV:229081-229449	CELE1	NA	NA	1	NA	NA	NA	NA	NA	0.377032	-0.143464	-0.860599	0.274105	0.475053	-0.887074	-0.44021	-0.0291827	13.2821	6.15401	5.30785	11.6473	14.8365	5.33324	9.25707	14.8092	20.4068	10.5639
chrIV:242628-242993	CELE1	NA	NA	NA	NA	NA	NA	NA	NA	0.131003	0.171657	0.518903	-0.899082	-0.243688	0.728118	0.766437	0.16593	9.53653	10.1239	6.19787	0	5.3035	8.9616	9.17935	3.18131	2.60065	10.6505
chrIV:427520-427678	CELE1	0.98709	0.992938	1	0.261902	0.933968	0.999728	0.989634	0.326701	0.287649	0.0466826	-0.498026	1.07476	0.127915	-0.698737	0.069802	-1.08838	131.837	107.873	186.426	245.897	115.976	158.676	289.558	118.034	363.709	138.93
chrIV:429654-429742	CELE1	NA	NA	NA	NA	NA	NA	NA	NA	-0.00242366	-0.212794	-0.0580295	-0.214844	0.0730785	-0.171169	-0.0240512	-0.0717298	7.88817	0	14.6711	0	10.4661	10.6052	15.289	14.0937	21.3896	10.6832
chrIV:584477-584819	CELE1	NA	NA	NA	NA	NA	NA	NA	NA	0.484778	0	0	0	0.789609	0	0.34301	0	4.07426	0	0	0	7.13084	0	2.02453	0	0	0
chrIV:794358-794427	CELE1	NA	NA	1	NA	NA	NA	NA	NA	-1.03916	-0.573165	0.391336	-0.12124	0.297005	-0.0145706	-0.0214328	0.171344	9.93465	31.5902	75.3638	62.3481	98.1699	50.9688	48.798	60.7889	65.5716	96.4356
chrIV:1503169-1503375	CELE1	NA	NA	NA	NA	NA	NA	NA	NA	0.416881	0.77287	0.194749	0.00607164	0.380426	0.158946	1.48069	0.661583	10.1426	17.9003	5.47928	3.62109	9.3772	5.44889	29.513	11.6846	4.59825	4.59325
chrIV:1577560-1577914	CELE1	0.98709	NA	1	NA	NA	NA	NA	NA	0.0329568	0.0222078	-0.393273	-0.51913	0.218012	-0.590879	-0.403673	0.671791	31.4737	30.9776	13.5046	18.0663	37.1829	11.3796	13.376	35.5794	26.2166	41.0655
chrIV:1599871-1599956	CELE1	NA	NA	NA	NA	NA	NA	NA	NA	1.35191	1.19504	1.24471	0.237845	0.362509	1.00232	0.371846	0.858996	81.3254	68.7985	35.9629	16.6583	22.5707	26.2307	7.74775	21.3549	0	11.0559
chrIV:1734896-1735242	CELE1	0.98709	NA	1	NA	NA	0.86627	NA	NA	-0.0849099	-0.48264	-0.395821	-0.390469	-0.434302	-1.08235	-1.01147	-0.806423	40.273	27.7292	36.792	30.1018	29.3117	20.3325	21.6891	25.9442	67.3573	58.2704
chrIV:1949922-1950013	CELE1	NA	NA	NA	NA	NA	NA	NA	NA	0.200181	0	0.564735	0	0.388478	0	0	0.905016	7.63094	0	14.1927	0	15.1872	0	0	25.8012	0	0
chrIV:1979096-1979236	CELE1	NA	NA	NA	NA	NA	NA	NA	NA	-0.430372	-0.177823	-0.417934	-0.417172	-0.186603	0.449084	-0.39526	0.464013	4.97906	10.5961	0	5.31607	10.1864	12.6518	0	12.7059	6.45067	20.4541
chrIV:2137543-2137676	CELE1	NA	NA	NA	NA	NA	NA	NA	NA	-0.840904	-0.155415	1.20516	-0.15784	-0.352526	0.569878	0.92684	0.328772	0	16.0582	21.8006	16.285	10.7185	8.41731	15.3368	4.68039	0	28.6182
chrIV:2143196-2143546	CELE1	NA	NA	NA	NA	NA	NA	NA	NA	-0.0158772	0.0185629	0.133473	-0.167025	0.0193713	-1.29151	-0.607914	-0.944473	7.96281	8.34352	11.7985	6.21705	8.40649	0	3.95678	1.65863	13.5589	10.9255
chrIV:2790285-2790460	CELE1	NA	NA	NA	NA	NA	NA	NA	NA	0.179631	0.193369	0.570232	0.177038	0.331544	0.92463	0.859674	0.577743	7.94019	8.15074	6.93165	7.76195	11.4727	12.8173	11.6769	7.12695	0	5.58196
chrIV:2882440-2882594	CELE1	NA	NA	NA	NA	NA	NA	NA	NA	0.555108	0.432004	0.517997	0.390046	0.972562	0.627267	0.414329	-0.0697306	18.0319	14.6505	20.5069	13.2203	31.8117	22.5005	17.739	8.09254	11.7361	6.33823
chrIV:2915888-2916082	CELE1	NA	NA	NA	NA	NA	NA	NA	NA	0.316001	-0.200485	0.446192	0.321108	0.429831	0.155215	0.529759	-0.35375	14.2991	3.67828	19.2086	14.3524	16.7189	13.0447	21.0783	6.2018	14.4268	9.91399
chrIV:2984169-2984517	CELE1	NA	NA	NA	NA	NA	NA	NA	NA	-0.629341	-0.375688	-0.0522383	-0.627083	-0.284925	-0.335858	-0.320525	-0.0349816	0	2.0552	1.62494	0	2.89283	0	0	1.79705	2.72733	8.2637
chrIV:3110609-3110954	CELE1	0.98709	NA	1	NA	NA	0.999728	NA	NA	-0.0987031	-0.176753	0.568031	-0.796017	0.0185987	-0.082665	-0.37051	0.32415	30.2442	28.1534	37.1462	14.7802	33.5475	20.9233	15.5684	30.1646	29.6495	44.5161
chrIV:3237722-3238035	CELE1	0.98709	NA	1	NA	NA	0.999728	NA	NA	-0.123021	-0.294761	0.384877	-0.456075	0.199197	-0.170374	-0.383694	0.277216	20.0591	16.3691	31.9014	13.4756	27.6936	18.8773	15.3016	28.6709	29.3704	30.6832
chrIV:3262566-3262934	CELE1	NA	NA	NA	NA	NA	NA	NA	NA	-0.460771	-0.427008	-0.830722	-0.733359	-0.293874	0.0206398	-1.16258	0.202968	9.49489	9.88033	1.76928	6.09403	11.9946	7.89114	0	9.58827	10.0888	23.3617
chrIV:3354684-3354757	CELE1	NA	NA	NA	NA	NA	NA	NA	NA	-0.325255	-0.320798	NA	-0.323651	-0.341653	NA	NA	NA	0	0	0	0	0	0	0	0	0	12.8487
chrIV:3600611-3600972	CELE1	NA	NA	NA	NA	NA	NA	NA	NA	-0.25335	0.213892	0	-0.25205	-0.272271	0.265548	0.342992	0	0	4.1272	0	0	0	1.30368	1.91827	0	0	2.71388
chrIV:3653210-3653293	CELE1	NA	NA	NA	NA	NA	NA	NA	NA	0	0.222177	0	0.226685	0.152769	0.692133	0	0	0	8.53887	0	8.92341	5.54454	21.237	0	0	0	0
chrIV:3899166-3899448	CELE1	NA	NA	NA	NA	NA	NA	NA	NA	0.227868	0	-0.338517	0.226059	0	-0.341689	-0.334306	-0.0306394	2.45733	0	0	2.41361	0	0	0	2.21615	3.36338	0
chrIV:4158516-4158872	CELE1	NA	NA	1	NA	NA	NA	NA	NA	-0.163001	-0.656416	0.580394	-0.474436	0.415262	0.290771	-0.47752	-0.13707	9.77695	4.18501	15.0174	6.11256	18.9208	11.3158	3.73281	6.52302	10.3094	16.2456
chrIV:4425195-4425356	CELE1	NA	NA	NA	NA	NA	NA	NA	NA	NA	NA	NA	NA	NA	NA	NA	NA	0	0	0	0	0	0	0	0	0	0
chrIV:4441879-4442223	CELE1	NA	NA	NA	NA	NA	NA	NA	NA	-0.901059	-0.36027	-0.696524	0.00295405	-0.973537	-0.405816	0.205811	0.150644	0	4.33057	0	8.49783	0	1.36792	5.87544	5.32326	5.5179	11.2988
chrIV:4450442-4450751	CELE1	0.98709	NA	1	NA	NA	NA	NA	NA	-0.536356	-1.01701	-0.673896	-0.704861	-0.411128	-0.240199	-0.270723	-0.517518	24.7405	14.2665	11.2529	20.6888	27.925	18.1923	17.467	13.5814	30.1587	55.82
chrIV:4451171-4451515	CELE1	0.98709	NA	1	NA	NA	NA	NA	NA	-0.89425	-1.84689	-0.568401	-0.886403	-1.4231	-0.125863	-0.172558	-0.0437377	18.1991	4.50308	8.96466	18.2043	9.90266	14.4453	13.6822	15.5785	21.7038	58.9749
chrIV:4471815-4472151	CELE1	0.939006	0.722558	1	0.499744	0.67434	0.999728	0.739636	0.756823	-0.861099	-0.668815	0.241213	-0.720002	-0.418304	0.355212	0.581216	0.63233	68.3535	79.8007	68.2728	76.717	97.3472	74.0108	89.0807	92.9106	74.503	180.186
chrIV:4696256-4696531	CELE1	NA	NA	NA	NA	NA	NA	NA	NA	-0.22813	-0.485576	0.190121	-0.489553	-0.124826	0.399895	-0.00316189	-0.0522195	2.51966	0	4.10946	0	3.51645	6.46344	2.516	2.10935	3.29545	7.00445
chrIV:4763451-4763836	CELE1	NA	NA	NA	NA	NA	NA	NA	NA	0.835775	0.0219884	0.619566	0.360944	0.56049	0.105029	0.277628	0.639452	14.533	3.87059	6.09891	7.59521	9.95623	2.44524	3.59801	6.38263	2.4659	4.92644
chrIV:5186947-5187036	CELE1	NA	NA	NA	NA	NA	NA	NA	NA	-0.0120428	0.437559	0.868538	0.226595	0.0750294	0.594986	0.69422	0.346832	7.72695	24.5701	19.8564	15.918	10.7838	12.5324	15.1191	6.96857	0	10.9158
chrIV:6304216-6304508	CELE1	NA	NA	NA	NA	NA	NA	NA	NA	0	0	0.462447	0.318963	0	0	0.294105	0	0	0	3.87102	2.33123	0	0	2.37002	0	0	0
chrIV:6304836-6305194	CELE1	NA	NA	NA	NA	NA	NA	NA	NA	0.225802	0.231937	0	0	0	0.410642	0	0	1.93712	1.99795	0	0	0	1.82727	0	0	0	0
chrIV:6763153-6763513	CELE1	NA	NA	NA	NA	NA	NA	NA	NA	-0.276964	-0.55458	0.323224	-0.018227	0.281989	0.723448	0.771437	0.667864	9.66862	6.12552	6.52128	13.429	18.9275	10.6806	11.3079	10.05	5.27334	18.6118
chrIV:8136991-8137222	CELE1	NA	NA	NA	NA	NA	NA	NA	NA	-1.5233	-0.877016	0.483455	-0.747156	-0.895404	-0.143743	0.214231	0.489152	2.99752	12.8797	12.9614	15.581	12.7184	4.86172	8.97951	13.1288	8.20549	49.5884
chrIV:8422422-8422518	CELE1	NA	NA	NA	NA	NA	NA	NA	NA	NA	NA	NA	NA	NA	NA	NA	NA	0	0	0	0	0	0	0	0	0	0
chrIV:11131901-11132264	CELE1	NA	NA	1	NA	NA	NA	NA	NA	-0.282556	0.014382	0.40375	-0.261292	0.250151	0.398921	0.511759	0.668335	9.60712	14.1206	9.8191	9.93077	18.3423	10.3073	11.1375	13.166	7.72862	18.8059
chrIV:11176672-11177069	CELE1	NA	NA	NA	NA	NA	NA	NA	NA	0.763681	-0.417064	-0.665785	-0.433507	-0.380452	0.48346	-0.287067	0.306265	15.7923	1.80217	0	1.71621	2.34041	7.77861	1.74476	5.85105	4.67684	7.24631
chrIV:11850324-11850591	CELE1	NA	NA	NA	NA	NA	NA	NA	NA	-0.328891	-0.324434	0	-0.327286	-0.344888	0.238292	0	0.511707	0	0	0	0	0	1.76094	0	4.51251	0	3.66577
chrIV:12106535-12106936	CELE1	NA	NA	NA	NA	NA	NA	NA	NA	0.108973	0.0136179	0.233619	-0.743225	0.470551	-0.222445	-0.0362713	0.327102	10.396	9.06926	9.53093	1.69913	15.8385	5.15369	6.69984	10.3613	9.36581	12.0619
chrIV:12393042-12393414	CELE1	NA	NA	NA	NA	NA	NA	NA	NA	-0.560531	-0.550388	0.111503	-0.815761	-0.654006	-0.394768	-0.540727	-0.931383	1.88216	1.92296	6.5414	0	1.24864	2.53046	1.78634	0	7.42875	10.2811
chrIV:12419868-12419966	CELE1	NA	NA	NA	NA	NA	NA	NA	NA	-0.440105	-0.185006	0.942158	-0.715479	-0.347441	0	0.342024	0.306445	7.09138	15.0914	23.7796	0	9.80344	0	6.73037	5.8806	0	29.451
chrIV:12419964-12420014	CELE1	NA	NA	NA	NA	NA	NA	NA	NA	NA	NA	0	NA	NA	0	0.5701	0.286486	0	0	0	0	0	0	26.6808	11.4153	0	0
chrIV:12650874-12651212	CELE1	NA	NA	NA	NA	NA	NA	NA	NA	-0.220843	0.0140039	0	-0.219839	-0.0665699	0.270863	0	0.325537	0	2.29139	0	0	1.37387	1.39213	0	1.85006	0	2.80473
chrIV:12851995-12852130	CELE1	NA	NA	NA	NA	NA	NA	NA	NA	0.331298	0.00186119	0.858378	-0.00646949	-0.0103297	0.837201	0.376943	1.23505	20.5511	10.548	13.1403	10.534	10.5609	13.117	4.89931	22.0653	0	14.4474
chrIV:13037312-13037399	CELE1	NA	NA	NA	NA	NA	NA	NA	NA	0	0	0.391579	0.329288	0	0	0	0	0	0	6.44437	8.5178	0	0	0	0	0	0
chrIV:13106958-13107355	CELE1	NA	NA	NA	NA	NA	NA	NA	NA	-0.725569	-1.047	0.28739	-0.693491	-0.600715	0.192254	-0.568496	0.43781	7.03911	3.75389	7.77087	7.53333	8.48583	6.8537	1.74476	9.22876	6.96212	24.2868
chrIV:13197684-13198080	CELE1	NA	NA	NA	NA	NA	NA	NA	NA	-0.00242366	-0.212794	-0.0589057	-0.214844	0.0730785	0.17623	-0.359956	-0.054849	1.76838	0	1.42848	0	2.34631	2.84111	0	1.46645	2.39757	2.39497
chrIV:13286785-13287113	CELE1	0.98709	NA	1	NA	NA	NA	NA	NA	0.0746682	0.39968	0.610682	-0.00541596	-0.107771	0.26321	-0.0290478	1.20149	21.2784	29.6081	16.8169	19.494	17.5811	11.7194	8.18643	28.9965	11.1868	26.2982
chrIV:13314752-13315003	CELE1	NA	NA	1	NA	NA	NA	NA	NA	0.120995	0.283738	0.780236	0.358385	-0.539088	0.153283	0.299893	0.838626	13.9295	17.5501	26.7965	19.2376	3.85135	14.158	16.1991	28.0799	14.9407	15.4686
chrIV:13319089-13319463	CELE1	0.98709	0.99193	1	0.913629	0.993748	0.388124	0.809049	0.161162	-0.0600513	0.0508477	-0.511799	-0.218061	-0.00942326	-1.01735	-0.400453	-1.14652	100.653	109.643	82.9838	88.8018	104.558	56.934	90.6398	51.599	161.263	141.306
chrIV:13406976-13407135	CELE1	0.98709	NA	1	NA	NA	0.999728	NA	NA	-0.637872	-0.405349	-0.002602	-1.35976	-0.35445	-0.73142	-0.409654	-0.416428	43.7124	54.9108	62.0706	17.9077	57.7479	31.1476	42.3469	42.5557	82.2284	108.744
chrIV:13407373-13407546	CELE1	NA	NA	NA	NA	NA	NA	NA	NA	-0.678574	-0.892165	-0.0716367	-1.18587	0.0427845	0.179715	0.274673	0.217449	8.03145	4.12221	3.25922	0	24.9879	6.4823	7.82024	6.9503	5.47033	33.1498
chrIV:13428983-13429110	CELE1	NA	NA	NA	NA	NA	NA	NA	NA	0.244125	0.264843	0.260834	0.256545	0.339144	0	0	0.46056	5.43301	6.06861	5.10051	5.85599	7.58234	0	0	9.79956	0	0
chrIV:13475534-13475865	CELE1	NA	NA	NA	NA	NA	NA	NA	NA	NA	NA	-0.441721	NA	NA	-0.447625	-0.432106	-0.442321	0	0	0	0	0	0	0	0	2.73959	0
chrIV:13477780-13477904	CELE1	NA	NA	NA	NA	NA	NA	NA	NA	0.153724	-0.387299	1.12651	0.166243	-0.35242	0.719445	-0.0182107	1.46171	22.4125	6.21426	33.8161	22.9219	7.76432	20.3497	5.55532	48.0141	7.6147	22.8193
chrIV:13484727-13485005	CELE1	NA	NA	NA	NA	NA	NA	NA	NA	0.294193	0.482235	0.274727	-0.405479	0.190948	-0.182754	-0.274922	-0.344578	12.534	16.4917	11.0853	2.68662	10.7159	5.73423	4.87714	4.33459	10.2348	10.337
chrIV:13852133-13852488	CELE1	NA	NA	NA	NA	NA	NA	NA	NA	-0.624827	-0.818463	1.21716	-0.602189	-0.238541	0	0	0.632882	3.90689	2.01479	8.44676	4.21105	8.28842	0	0	3.39705	0	16.2024
chrIV:14499569-14499766	CELE1	NA	NA	NA	NA	NA	NA	NA	NA	0	0	0	0.318963	0	0.276407	0	0.271277	0	0	0	3.44975	0	3.31307	0	3.16753	0	0
chrIV:15044981-15045229	CELE1	0.98709	NA	1	NA	NA	0.999728	NA	NA	-0.552445	-0.973498	-0.701224	-0.665769	0.499352	-0.725274	-0.567127	-0.319547	16.8104	8.64174	23.8086	14.5173	50.6708	23.0659	27.2108	34.1785	59.8034	42.3843
chrIV:15514806-15515154	CELE1	NA	NA	1	NA	NA	NA	NA	NA	0.234997	0.279145	-0.275614	0.258371	-0.268916	-0.382025	-0.0407311	-1.17721	13.9863	14.7275	15.3617	14.4625	7.12016	13.7523	19.4946	5.39116	26.9097	13.7124
chrIV:16815125-16815447	CELE1	NA	NA	NA	NA	NA	NA	NA	NA	-0.571623	-0.548859	-0.0535911	-0.572334	-0.672916	0.363493	0.690088	0.206238	2.17352	2.4049	2.02126	2.11471	1.44192	4.9531	8.25147	3.74412	2.94686	11.9705
chrIV:17000200-17000360	CELE1	NA	NA	NA	NA	NA	NA	NA	NA	-0.567974	-0.37062	-0.317269	-0.398942	0.051336	-0.368338	-0.220218	-0.514823	12.9994	18.1899	14.6222	17.3834	32.306	14.0114	16.7288	11.1275	29.2975	41.5357
chrIV:17456457-17456768	CELE1	NA	NA	NA	NA	NA	NA	NA	NA	0.416612	0.45031	0	0.607109	0.432473	0.305718	0.571402	0	4.45786	4.97937	0	7.20737	4.60347	2.10253	4.36129	0	0	0
chrV:175693-176046	CELE1	NA	NA	NA	NA	NA	NA	NA	NA	0.750665	0.38958	-0.0396996	-0.237101	0.59028	-0.11413	0.477432	1.0145	13.7701	8.44094	1.84425	1.92952	10.9666	1.33314	5.64666	11.8933	2.56933	5.4611
chrV:205579-205734	CELE1	0.98709	NA	1	NA	NA	NA	NA	NA	-0.587742	-1.00895	0.178233	-1.57361	-0.648706	0.399295	-0.209543	0.679768	40.3754	24.5153	28.1958	9.18344	37.5788	36.6657	17.4451	46.2251	29.9654	98.5318
chrV:312304-312469	CELE1	NA	NA	NA	NA	NA	NA	NA	NA	0.44878	0.263965	-0.0508861	0	0.169222	0.886451	0.28355	0.463521	8.41851	4.67941	3.93293	0	2.80567	19.2753	8.19712	11.0634	5.73396	0
chrV:686776-687077	CELE1	0.98709	NA	1	NA	NA	0.999728	0.994233	NA	-0.217432	-0.22106	-0.392053	-0.0695066	-0.548657	-0.512181	0.0785996	-0.693119	39.3219	38.9862	31.1812	44.9557	29.182	28.0503	46.9841	24.1758	58.2033	64.3283
chrV:903182-903341	CELE1	NA	NA	NA	NA	NA	NA	NA	NA	-0.190077	-0.172001	-0.0707856	-0.0128841	0.0510989	-0.616898	-0.0060739	-0.608768	8.69282	8.96581	7.08881	13.2229	14.7985	0	8.50451	0	11.3693	18.4205
chrV:906518-906857	CELE1	NA	NA	1	NA	NA	NA	NA	NA	-0.0236336	-0.676213	-0.837288	-0.713068	-0.224166	-0.750925	-0.591828	-1.69937	16.4603	6.50386	12.1802	6.02692	12.7879	13.0336	16.0912	3.68925	38.0738	22.7439
chrV:914138-914435	CELE1	NA	NA	NA	NA	NA	NA	NA	NA	0.334955	0.0193351	-0.296669	-0.222875	0.276866	-0.62697	0.186677	-0.575585	9.35679	5.01358	4.09386	2.29212	8.33871	1.58366	9.32101	1.95362	9.29841	6.38123
chrV:940178-940425	CELE1	NA	NA	NA	NA	NA	NA	NA	NA	0.410474	0.243992	-0.0795888	-0.282573	0.513834	-0.141296	-0.26942	-0.620558	8.43911	6.02438	4.57343	0	9.70493	3.8059	2.80006	0	7.50557	3.96139
chrV:943784-944091	CELE1	NA	NA	NA	NA	NA	NA	NA	NA	-0.814972	-0.103307	-0.113741	0.111635	-0.322425	-0.374865	-0.227352	-0.537969	4.53725	14.3592	7.64344	18.6054	10.8387	5.19432	6.58126	3.92647	11.9496	21.9172
chrV:980291-980447	CELE1	NA	NA	NA	NA	NA	NA	NA	NA	0.185741	0.365456	0.31997	0.374136	0.431591	0.480116	0.340619	1.23567	8.94327	13.7057	4.15838	14.3229	15.5788	6.01186	4.24399	22.5355	0	6.05607
chrV:983016-983110	CELE1	NA	NA	NA	NA	NA	NA	NA	NA	-0.393521	-0.150358	0.432317	-0.174575	0.323586	0.370065	0.268091	0.432425	14.7102	23.9035	18.8113	22.9704	45.7674	16.8405	14.0275	18.8582	9.57415	40.6995
chrV:984900-985073	CELE1	NA	NA	NA	NA	NA	NA	NA	NA	-0.534677	-0.307061	0.497674	-0.533406	0.0791718	-0.211005	-0.478307	-0.318008	8.03145	12.7087	29.0311	7.85116	22.5357	11.9068	7.65869	10.2962	21.3952	27.8671
chrV:986634-986985	CELE1	NA	NA	1	NA	NA	NA	NA	NA	0.103999	-0.256632	-0.270713	-0.278008	0.396311	0.424536	-0.305126	-0.56471	13.8859	8.4889	12.0086	8.32883	19.0786	24.5218	11.5172	8.65305	21.0319	16.2967
chrV:1011198-1011353	CELE1	NA	NA	NA	NA	NA	NA	NA	NA	-0.662921	-0.85211	-0.0732894	-0.288498	0.0350221	0.727778	0.28401	0.625089	8.91572	4.97937	3.63529	18.3669	28.3719	17.4857	8.90276	15.2161	5.83041	37.3802
chrV:1011544-1011714	CELE1	NA	NA	NA	NA	NA	NA	NA	NA	-0.660785	-0.170438	1.03418	-0.393174	-0.157701	0.768401	0.365541	0.605206	0	8.73712	14.2687	4.38343	8.85611	9.35586	3.89653	7.07223	0	17.0506
chrV:1014849-1015058	CELE1	NA	NA	1	NA	NA	NA	NA	NA	-0.160059	-0.10934	-0.153492	-0.909861	-0.0657784	-0.804262	-0.849727	-0.57227	16.6208	17.928	22.4208	3.25262	18.6725	10.7421	9.78637	14.0757	35.2535	27.6176
chrV:1051123-1051484	CELE1	NA	NA	NA	NA	NA	NA	NA	NA	0.232234	0	0.546598	0	0.459675	0.252134	0.333365	0	1.93936	0	3.37009	0	3.96763	1.30368	1.91827	0	0	0
chrV:1186839-1187155	CELE1	NA	NA	NA	NA	NA	NA	NA	NA	0.334427	-0.481361	-0.507663	-0.317412	-0.0317966	-0.209635	-0.0282929	0.012309	17.6546	4.90083	5.63746	6.88386	10.9006	8.60496	10.7756	11.1611	14.7464	15.3959
chrV:1199056-1199196	CELE1	NA	NA	NA	NA	NA	NA	NA	NA	-0.00651533	0.0177769	0.624083	0.220601	0.244627	0.712209	0.490667	-0.410561	4.9321	5.50909	17.3046	10.1604	10.4634	19.3459	14.1767	0	6.75062	6.74329
chrV:1205983-1206295	CELE1	NA	NA	NA	NA	NA	NA	NA	NA	-0.628503	-0.472147	0.495191	-1.07212	-1.43844	0.559761	0.171878	-0.586838	11.109	13.9396	12.6829	4.78956	1.61277	13.8263	8.6049	2.00374	8.85279	34.223
chrV:1208779-1208967	CELE1	NA	NA	NA	NA	NA	NA	NA	NA	-0.152981	-0.873708	-0.577637	-0.457539	-1.05267	-0.200651	-0.547181	0.104355	18.4676	4.10996	3.45432	11.5459	2.46424	7.49097	3.52543	12.7974	14.661	30.5189
chrV:1214497-1214776	CELE1	NA	NA	NA	NA	NA	NA	NA	NA	-0.441359	0.190755	0.181483	-0.439037	0.30784	0.592466	0.25971	0.432818	2.50731	10.6718	4.05075	2.43947	12.2015	8.71392	4.85972	6.7197	3.39942	10.413
chrV:1220642-1220954	CELE1	NA	NA	1	NA	NA	NA	NA	NA	-0.645345	-0.770913	0.0600764	-0.474747	-1.04359	0.595713	0.16646	0.490314	8.92954	7.25505	7.24735	11.5489	4.46398	14.746	8.6049	13.1637	8.71767	27.9456
chrV:1265146-1265442	CELE1	NA	NA	NA	NA	NA	NA	NA	NA	-0.540377	-0.312084	-0.793492	-0.168731	-0.548138	-1.18448	-0.469131	-0.297711	4.7053	7.44549	2.1982	9.4233	4.83597	0	4.58155	6.18358	12.8194	16.4327
chrV:1374733-1374860	CELE1	0.98709	NA	1	NA	NA	0.999728	NA	NA	0.659312	0.29698	1.07541	0.262755	0.340196	0.588658	0.76456	0.877524	98.0012	68.6385	90.8797	66.6343	72.1848	58.8072	69.4285	76.9905	43.2957	67.8415
chrV:1384356-1384651	CELE1	NA	NA	NA	NA	NA	NA	NA	NA	-1.26607	-0.622555	0.443621	-1.53919	-0.615816	-0.43646	-0.0180795	0.097662	2.37178	9.89384	12.6543	0	9.83656	3.18872	6.94303	8.17129	9.36123	29.4437
chrV:1384892-1385143	CELE1	NA	NA	NA	NA	NA	NA	NA	NA	-0.329268	0.023724	-0.298378	-0.167551	-0.21825	-0.33322	0.278699	-0.137668	5.5718	12.0937	9.68231	8.13156	7.39272	9.68213	18.9547	11.7297	18.3822	15.4686
chrV:1470547-1470879	CELE1	NA	NA	1	NA	NA	NA	NA	NA	-0.0175416	0.293323	0.348019	-0.154083	0.159137	-0.556197	0.10545	-0.640198	10.5015	15.6138	18.5754	8.60431	13.1741	6.22157	14.4285	5.6502	17.0232	14.3713
chrV:1761440-1761772	CELE1	NA	NA	NA	NA	NA	NA	NA	NA	0	0	0.824436	0	0.271038	0.280378	0	0	0	0	5.36659	0	1.51591	1.41721	0	0	0	0
chrV:1764493-1764558	CELE1	NA	NA	NA	NA	NA	NA	NA	NA	-0.190638	-0.171985	0.278037	-0.411189	-0.433193	0	0.294159	0.469747	10.5368	11.7694	9.89191	0	0	0	10.5214	17.6418	0	28.8122
chrV:1771231-1771417	CELE1	NA	NA	1	NA	NA	NA	NA	NA	-0.632999	-0.877424	-0.305647	-0.900033	-0.589038	-0.234318	-0.18793	-0.476022	22.4193	15.6608	15.6218	15.3221	23.8774	17.1107	18.2666	12.6936	29.8617	62.536
chrV:1866157-1866350	CELE1	NA	NA	1	NA	NA	NA	NA	NA	0.445311	0.171814	0.088651	0.345022	0.143324	-0.497108	-0.313037	-0.96777	32.3985	23.4106	31.4425	28.5099	22.6132	17.4421	20.8972	9.46661	38.161	24.6682
chrV:1878702-1879075	CELE1	NA	NA	NA	NA	NA	NA	NA	NA	-0.347627	0.509984	-0.00302933	0.251252	0.0547035	-0.0730344	-0.403453	-0.973811	5.61369	17.7378	9.32725	13.1401	10.3801	8.55535	5.41986	1.55663	12.7251	12.8804
chrV:1884006-1884205	CELE1	NA	NA	NA	NA	NA	NA	NA	NA	-0.809427	-0.566828	0.82436	-0.591985	-0.0016149	-0.143992	0.217595	0.517427	6.98736	11.3541	21.5639	10.9109	24.6541	5.6396	9.9946	15.0044	9.3069	33.9106
chrV:2056593-2056658	CELE1	NA	NA	NA	NA	NA	NA	NA	NA	-0.00965592	-0.249251	0	-0.0101559	0.225285	0	0	0	10.5368	0	0	10.3493	21.7618	0	0	0	0	14.8852
chrV:2060322-2060463	CELE1	NA	NA	NA	NA	NA	NA	NA	NA	0.403719	0.237869	0.127303	-0.2793	-0.326541	-0.303383	-0.913314	-0.584858	14.7387	10.5215	17.7866	0	0	9.23928	0	4.4167	19.5136	6.91849
chrV:2086971-2087012	CELE1	NA	NA	NA	NA	NA	NA	NA	NA	0.22382	0	-0.356624	0.234898	0	0.1754	-0.348099	-0.357185	16.5578	0	0	17.8468	0	26.8552	0	0	22.6628	0
chrV:2377210-2377566	CELE1	0.98709	NA	NA	NA	NA	NA	NA	NA	-0.26904	-1.06451	-0.156116	-1.97574	0.0348721	-1.45402	-1.37194	-0.917677	21.539	8.37001	12.9485	0	28.3812	1.8375	1.94514	5.01829	20.7373	37.6407
chrV:2378980-2379223	CELE1	NA	NA	NA	NA	NA	NA	NA	NA	-0.284681	-0.57436	-0.623464	-0.79568	-0.208441	-0.88163	-1.06466	-0.62346	14.3319	9.06275	7.32408	5.87138	15.5904	4.62262	2.73076	7.34234	23.4058	27.7955
chrV:2380187-2380381	CELE1	NA	NA	NA	NA	NA	NA	NA	NA	0.411904	0.780566	-0.74697	-0.28131	1.18087	-0.796345	-0.424439	-0.750998	10.7328	19.3071	6.25626	0	30.4636	5.78421	10.5392	6.2018	23.9723	5.03808
chrV:2485171-2485527	CELE1	0.98709	NA	1	NA	NA	NA	NA	NA	-0.127625	-0.886604	-0.888896	-0.596798	0.599179	-0.72108	-0.774951	-1.22213	17.5688	6.36087	10.0116	9.93918	35.5606	12.1222	11.5134	6.52302	33.4761	27.076
chrV:2487260-2487503	CELE1	NA	NA	NA	NA	NA	NA	NA	NA	-0.027882	-0.544639	0.147584	-0.396794	-0.0145539	0.127879	-0.318761	-0.0803543	19.9779	8.81883	7.32408	11.7428	20.2083	7.3111	2.73076	4.95636	7.62861	27.9251
chrV:2488467-2488661	CELE1	NA	NA	NA	NA	NA	NA	NA	NA	-0.00881098	-0.385934	-0.300295	-0.185226	-0.0422005	-0.578478	-1.05531	-0.280984	10.7668	3.9835	8.72469	7.34676	9.95426	4.84032	0	9.18734	19.0911	14.6277
chrV:2630613-2630720	CELE1	NA	NA	NA	NA	NA	NA	NA	NA	0.216184	0	-0.0440827	0.225958	0.152299	-0.329106	-0.000543411	-0.323009	6.50043	0	5.25097	6.94043	4.31242	0	6.42977	0	8.4217	0
chrV:2652266-2652419	CELE1	NA	NA	NA	NA	NA	NA	NA	NA	-1.24566	-0.491659	0.947752	-0.687572	-0.774892	0.397402	0.601969	0.905656	4.51575	25.2202	32.8013	18.1735	16.1359	16.5176	21.9984	30.8274	11.8123	62.5618
chrV:2663750-2663863	CELE1	NA	NA	NA	NA	NA	NA	NA	NA	0	0.510869	0.193902	0.496701	0.178765	0.541746	0.505798	-0.0726407	0	13.1057	9.94921	12.5668	4.08545	18.1735	17.7809	5.10684	8.34945	0
chrV:2675061-2675380	CELE1	NA	NA	NA	NA	NA	NA	NA	NA	-0.749432	-0.494316	0.463589	-0.501123	-0.675503	0	0	0.271229	2.17321	4.6689	3.54441	4.68479	3.03294	0	0	1.95991	0	15.0539
chrV:2704614-2704911	CELE1	NA	NA	NA	NA	NA	NA	NA	NA	-0.0238963	-0.684718	0.828774	-0.323333	-0.498528	-0.150541	0.421592	-0.100681	11.6904	2.60665	14.7602	6.87635	4.9508	3.78497	9.03804	4.05823	6.38817	16.3775
chrV:3190608-3190741	CELE1	NA	NA	NA	NA	NA	NA	NA	NA	0.180618	0.014605	NA	-0.224236	-0.246124	NA	NA	NA	10.3795	5.79688	0	0	0	0	0	0	0	7.09555
chrV:3212391-3212495	CELE1	NA	NA	1	NA	NA	NA	NA	NA	0.402026	0.438329	1.25232	0.212044	0.223341	1.45774	1.22486	0.97607	19.9954	21.6269	46.4751	13.0105	13.6789	56.4521	45.2235	34.5529	8.66232	9.05527
chrV:3577909-3578213	CELE1	NA	NA	NA	NA	NA	NA	NA	NA	-0.00967006	-0.167157	-0.318728	-0.368052	-0.471507	0.0159687	-0.935391	-0.0943496	6.90538	4.70338	3.9999	2.45759	1.65508	6.79273	0	5.87387	9.085	9.45584
chrV:3589410-3589713	CELE1	NA	NA	NA	NA	NA	NA	NA	NA	0	0.484168	-0.550541	0.480041	0.353642	-0.370934	-0.23054	-0.533363	0	4.71885	1.86548	4.71256	3.19257	3.10481	4.56852	2.06306	9.25401	0
chrV:3591881-3592043	CELE1	NA	NA	NA	NA	NA	NA	NA	NA	-0.22259	0.00978306	-0.0488719	-0.221351	0.0856752	-0.317631	-0.306629	-0.313356	0	4.76553	3.47917	0	6.19385	0	0	0	5.83949	6.02715
chrV:3694457-3694500	CELE1	NA	NA	NA	NA	NA	NA	NA	NA	-0.242284	0.21421	0.218089	-0.24017	0.238098	-0.367255	-0.347936	-0.0436359	0	33.9556	27.7266	0	34.4181	0	0	13.2314	20.6715	21.6092
chrV:3694912-3695045	CELE1	NA	NA	NA	NA	NA	NA	NA	NA	-0.287681	0.24529	0.156497	0.603124	0.735075	-0.365442	-0.0244742	-0.355573	0	11.1496	13.9764	21.8787	25.2042	4.89544	10.1546	4.68039	14.2065	7.33153
chrV:3709720-3710021	CELE1	NA	NA	NA	NA	NA	NA	NA	NA	-0.218824	0.197716	1.06223	0.688309	0.493361	0.549872	1.46718	1.04908	4.62739	9.89435	8.36325	18.5346	14.5264	3.73483	13.6102	8.15793	0	9.65448
chrV:3738918-3739159	CELE1	NA	NA	NA	NA	NA	NA	NA	NA	0.198165	5.50379e-05	0.295499	-0.257302	-0.0810772	0.528469	0.342326	0	5.77468	2.9639	2.34341	0	2.08594	4.66083	2.86948	0	0	4.05961
chrV:3742038-3742381	CELE1	NA	NA	NA	NA	NA	NA	NA	NA	0	0.452395	0.438372	0	0	0	0	0	0	4.51618	3.29712	0	0	0	0	0	0	0
chrV:3750784-3751031	CELE1	NA	NA	NA	NA	NA	NA	NA	NA	-0.213786	-0.190497	0.215445	0.316136	0.0134085	-0.39972	0.260127	0.431641	2.83083	3.13219	4.91924	11.5534	6.10643	0	5.37344	7.40534	3.66752	7.92278
chrV:3752584-3752893	CELE1	NA	NA	NA	NA	NA	NA	NA	NA	-0.00409752	0.00368829	0.310621	-0.229408	-0.0643481	-0.636441	-0.609671	-0.625784	2.24331	2.31376	7.59413	0	1.62838	0	0	0	5.86803	3.06711
chrV:3756389-3756537	CELE1	NA	NA	NA	NA	NA	NA	NA	NA	-0.360984	-0.825637	-0.327044	0.135548	-0.500518	0.195491	0.205696	0.134296	9.42345	0	4.38165	23.814	6.77582	12.6693	13.6042	12.0237	12.4925	25.9494
chrV:3778037-3778198	CELE1	NA	NA	NA	NA	NA	NA	NA	NA	-0.224627	-0.00141304	0.792669	-0.223624	-0.0613275	0.48958	0.356357	0.566181	0	4.42756	11.0313	0	3.11604	5.82631	4.28651	7.1874	0	6.06435
chrV:3778931-3779103	CELE1	NA	NA	NA	NA	NA	NA	NA	NA	-0.234003	0.202503	0.610136	-0.220107	-0.33932	0.324338	0.635161	0.584673	4.0198	12.7821	7.54758	4.33275	2.69215	3.79184	7.86544	6.99047	0	11.1747
chrV:4164043-4164349	CELE1	NA	NA	NA	NA	NA	NA	NA	NA	-0.393923	-0.164825	0	-0.392946	-0.407769	0	0.485485	0.243855	0	2.53023	0	0	0	0	4.34076	1.89635	0	6.19416
chrV:4178750-4178942	CELE1	0.98709	NA	1	NA	NA	NA	NA	NA	-1.05883	-0.33726	-0.0081632	-0.228007	-0.832441	0.404005	0.214581	0.203123	18.1877	42.7307	25.7287	47.3872	24.9412	38.4638	31.9451	31.5635	34.0843	79.97
chrV:4192011-4192371	CELE1	NA	NA	NA	NA	NA	NA	NA	NA	0.173249	0.374558	0.280341	0.188879	0.130293	-0.075373	0.180917	-0.590059	5.83418	8.44214	8.56733	6.04483	5.37695	5.45143	7.53862	1.73732	7.67569	5.26761
chrV:4201103-4201211	CELE1	NA	NA	NA	NA	NA	NA	NA	NA	0.14447	-0.652585	0.897807	-0.661804	0.560243	0.596098	0.702597	0.63898	25.5202	0	17.182	0	45.2368	10.3479	12.4837	11.095	0	26.459
chrV:4337349-4337550	CELE1	NA	NA	NA	NA	NA	NA	NA	NA	0.225802	0.231937	0	0	0	0	0.694996	1.06515	3.4427	3.55082	0	0	0	0	6.73625	11.751	0	0
chrV:4345192-4345394	CELE1	0.98709	NA	1	NA	NA	NA	NA	NA	-0.640538	-0.402256	-0.0583551	-0.940876	-1.08537	-1.16997	-1.21273	-0.922014	34.4205	43.5726	36.0583	24.8641	21.6106	11.1125	9.98536	14.7827	50.744	85.5539
chrV:4368345-4368507	CELE1	NA	NA	NA	NA	NA	NA	NA	NA	NA	NA	-0.349169	NA	NA	0.170462	-0.654263	0.331274	0	0	3.47917	0	0	12.0734	0	14.8387	11.4195	0
chrV:4368674-4368810	CELE1	NA	NA	NA	NA	NA	NA	NA	NA	0	0.334987	NA	0	0	NA	NA	NA	0	5.66994	0	0	0	0	0	0	0	0
chrV:4449588-4449873	CELE1	NA	NA	NA	NA	NA	NA	NA	NA	-0.177006	-0.133994	-0.352138	0.286078	0.213834	-0.344189	-0.661675	0.150717	7.29468	7.93996	1.98288	15.4926	13.7106	2.29367	0	6.26409	6.36045	13.4085
chrV:4518065-4518301	CELE1	NA	NA	NA	NA	NA	NA	NA	NA	0.283063	0.188492	-1.17667	-0.0132669	0.443191	0.147138	-0.229743	-0.121239	14.7273	12.8591	0	8.92687	18.016	14.2775	8.67146	10.0157	15.8863	12.4358
chrV:4527906-4528140	CELE1	NA	NA	1	NA	NA	NA	NA	NA	0.237213	-0.132448	0.33775	-0.507909	0.468834	-0.0033623	0.110846	-0.30141	20.8557	12.462	25.2269	6.37929	26.7616	17.6322	20.3259	12.9612	23.9423	20.499
chrV:4596743-4597118	CELE1	NA	NA	NA	NA	NA	NA	NA	NA	0.136872	0.159173	0.115004	-0.0159219	0.0497706	-0.624774	-0.563973	0.27776	7.41576	7.63048	6.48921	5.44988	6.29725	1.74465	1.84685	7.98107	7.36948	7.6703
chrV:4621541-4621805	CELE1	NA	NA	NA	NA	NA	NA	NA	NA	0.829398	0.515582	0.207918	1.12746	0.980011	0.389862	0.286499	0.816351	10.5719	5.86251	4.28004	16.4693	13.0395	6.03717	5.1348	11.3241	3.43224	0
chrV:4627620-4627757	CELE1	0.98709	0.430278	1	0.332071	0.00050637	0.17487	0.101618	0.0266631	0.774702	0.878969	0.56626	0.842603	1.7851	1.01919	1.01327	1.25034	344.689	373.296	295.842	361.065	736.799	410.924	408.897	484.902	255.971	251.244
chrV:4709240-4709515	CELE1	NA	NA	NA	NA	NA	NA	NA	NA	NA	NA	0.331078	NA	NA	0.268688	0	0	0	0	2.36546	0	0	1.7099	0	0	0	0
chrV:4730476-4730794	CELE1	NA	NA	NA	NA	NA	NA	NA	NA	-0.606533	-0.599732	0.388559	-0.154901	-0.286322	0.176589	-0.00241452	-0.361398	0	0	5.33328	4.69947	3.04245	3.5358	2.17685	0	2.85123	8.94172
chrV:4735905-4736256	CELE1	NA	NA	NA	NA	NA	NA	NA	NA	0	0.47132	-0.620325	0.257576	0.17999	0.137806	-0.273349	-0.621099	0	4.24445	0	2.12945	1.43409	5.06792	1.89292	0	5.16786	0
chrV:4738373-4738764	CELE1	NA	NA	NA	NA	NA	NA	NA	NA	-0.415325	-0.411609	-0.33687	-0.184783	-0.253946	-0.340084	-0.332618	-0.0359571	0	0	0	1.91216	1.28775	0	0	1.48515	2.32027	5.01237
chrV:4753280-4753602	CELE1	NA	NA	NA	NA	NA	NA	NA	NA	0.383438	0.0051963	0.294388	-0.255734	-0.0819269	0.31891	0	0	6.50006	2.22063	1.75574	0	1.56284	2.03093	0	0	0	2.94366
chrV:4761035-4761105	CELE1	NA	NA	NA	NA	NA	NA	NA	NA	0.22321	0.239121	NA	0	0	NA	NA	NA	9.88798	10.9406	0	0	0	0	0	0	0	0
chrV:5111061-5111371	CELE1	NA	NA	NA	NA	NA	NA	NA	NA	-0.00861443	-0.000833568	-0.0305092	-0.234344	-0.0787456	-0.0364799	-0.354487	0.205014	2.2361	2.30632	2.09925	0	1.49756	2.10929	0	3.88859	3.06057	3.15892
chrV:5112631-5112968	CELE1	NA	NA	1	NA	NA	NA	NA	NA	0.130122	0.565889	-0.456884	-0.185842	0.39619	0.216626	-0.336597	-0.134938	10.3461	17.8571	8.64286	6.25937	14.3571	18.0815	10.1061	12.7225	19.3372	11.5328
chrV:5123038-5123329	CELE1	NA	NA	NA	NA	NA	NA	NA	NA	-0.671777	-0.46168	-0.347112	-0.372122	-0.732129	-0.131719	0.216104	0.140338	7.16746	10.437	2.23584	11.6961	6.64754	3.86274	7.1344	6.28946	6.51943	26.266
chrV:5124049-5124345	CELE1	NA	NA	1	NA	NA	NA	NA	NA	-0.441475	-0.273426	-0.571093	-0.845809	-0.857529	-0.513015	-0.647678	-1.18494	16.4574	19.9214	10.1247	9.64726	9.93494	10.7734	9.25775	4.22338	25.2115	35.8538
chrV:5212867-5213003	CELE1	NA	NA	NA	NA	NA	NA	NA	NA	0.243574	0	0	0	0.179471	0.359866	0	0	5.0761	0	0	0	3.39957	3.44475	0	0	0	0
chrV:5227744-5228084	CELE1	NA	NA	1	NA	NA	NA	NA	NA	-0.291038	-0.783066	0.413896	-0.27748	0.143558	-0.63886	-0.723214	-0.443019	10.2551	4.38137	21.7173	10.4055	17.077	7.15513	5.94436	8.6683	19.0431	19.8889
chrV:5273853-5273978	CELE1	NA	NA	NA	NA	NA	NA	NA	NA	-0.244635	0.222964	1.55061	0.191099	0.399985	0.707662	0.27814	0.817663	5.5718	18.0225	52.9124	16.791	23.1081	20.1882	10.7994	23.8165	7.55426	15.3431
chrV:5434960-5435150	CELE1	NA	NA	NA	NA	NA	NA	NA	NA	-0.535114	-0.624455	-0.0673477	-1.15284	-0.933287	0.752915	0.334033	0.231433	21.9152	19.3998	10.2544	7.84886	12.3967	28.5631	17.5897	15.2403	14.5075	55.255
chrV:5532911-5533231	CELE1	NA	NA	NA	NA	NA	NA	NA	NA	0	0.448462	-0.332822	0	0	-0.33596	-0.00786683	-0.3331	0	4.65435	0	0	0	0	2.16329	0	2.96522	0
chrV:5616888-5617225	CELE1	NA	NA	NA	NA	NA	NA	NA	NA	0.354866	-0.513307	-0.735366	-0.24357	-0.153471	-1.01659	-0.652271	-0.485792	8.26907	0	3.35565	2.02086	2.87142	1.9408	4.0258	5.30039	13.705	5.71961
chrV:5722156-5722511	CELE1	NA	NA	NA	NA	NA	NA	NA	NA	0.389528	0.574508	0.306944	-0.267157	0.0785501	0.264644	0	0.974828	5.89753	8.22634	1.59299	0	2.83595	1.32565	0	6.79411	0	2.75962
chrV:5792572-5792882	CELE1	NA	NA	NA	NA	NA	NA	NA	NA	-0.0225538	0.0205083	0.238162	-0.18563	0.120943	-0.179174	-0.555077	0.410337	8.98696	9.60802	9.3932	6.80279	10.9853	5.14422	2.23285	11.8104	9.18171	12.534
chrV:6113413-6113767	CELE1	NA	NA	NA	NA	NA	NA	NA	NA	-0.166654	-0.73355	0.198463	-0.751484	0.15728	-0.39629	-0.0213469	-0.312756	7.87309	2.02046	9.82645	1.92409	12.0276	4.50662	7.66604	5.1733	10.3675	13.5697
chrV:6114913-6115152	CELE1	NA	NA	NA	NA	NA	NA	NA	NA	0	0.696118	0.265115	0	0.372087	0	0.308423	0.514169	0	9.2138	2.36294	0	4.04392	0	2.8934	5.22643	0	0
chrV:6416774-6417082	CELE1	NA	NA	NA	NA	NA	NA	NA	NA	-0.00790261	-0.231604	0.294717	-0.232969	-0.244775	0.314853	0	0.556409	2.25057	0	1.83529	0	0	2.12294	0	3.91376	0	3.17937
chrV:6455095-6455418	CELE1	NA	NA	NA	NA	NA	NA	NA	NA	-0.477926	-0.133957	0	-0.91969	-0.777632	0.265548	0.342992	0	4.29275	8.85512	0	0	1.55802	1.45658	2.14326	0	0	14.9657
chrV:6605782-6606145	CELE1	0.851811	NA	1	NA	NA	NA	NA	NA	-1.36188	-1.61911	0.513521	-1.63661	-1.79668	0.599471	1.21511	1.00518	11.5358	8.04554	8.73233	8.05426	6.61215	9.8017	18.6912	15.0126	5.11368	61.2945
chrV:6782217-6782571	CELE1	NA	NA	NA	NA	NA	NA	NA	NA	-0.222936	0.188857	0.31529	-0.221631	-0.070826	0	0	0.557933	0	4.04093	1.83906	0	1.31195	0	0	3.53336	0	2.67832
chrV:7056249-7056605	CELE1	NA	NA	NA	NA	NA	NA	NA	NA	NA	NA	0.413557	NA	NA	0	0	0	0	0	1.82876	0	0	0	0	0	0	0
chrV:7183389-7183723	CELE1	NA	NA	NA	NA	NA	NA	NA	NA	0	0	0.217177	0	0.392283	-0.0866142	-0.345991	-0.0431286	0	0	3.6417	0	2.89713	1.40875	0	1.73785	2.71506	0
chrV:7187615-7187952	CELE1	NA	NA	NA	NA	NA	NA	NA	NA	-0.0120089	-0.192128	-0.0362043	-0.202028	-0.456867	-0.0456665	-0.0187447	0.206069	4.15412	2.12209	1.93156	2.02086	0	1.9408	1.97132	3.57796	2.81609	5.81317
chrV:7192288-7192611	CELE1	0.98709	NA	1	NA	NA	NA	NA	NA	-0.398442	-0.107235	0.680037	-0.751217	0.046354	-0.219699	-0.382121	0.712104	25.8383	34.1252	25.2986	17.8919	39.3031	10.4437	8.31276	26.4057	17.3655	50.8638
chrV:7213353-7213670	CELE1	NA	NA	1	NA	NA	NA	NA	NA	-0.517709	-0.718121	0.789067	-1.28097	-0.529468	-0.814408	-0.211294	0.30272	15.3706	12.0264	24.2623	4.50509	15.0144	3.54692	8.46961	15.212	14.434	36.6749
chrV:7215277-7215650	CELE1	NA	NA	NA	NA	NA	NA	NA	NA	0.425615	-0.179825	0.698877	-0.192129	0.653193	0.0211169	0.536521	0.0880479	11.192	3.83564	12.8185	3.83053	14.6382	6.03166	10.9149	6.46712	7.52197	7.71132
chrV:7217120-7217497	CELE1	NA	NA	1	NA	NA	NA	NA	NA	-0.265226	-0.516204	0.509755	-0.71962	0.528511	0.0480868	0.131726	0.295928	11.0735	7.74756	15.9103	5.59701	25.779	9.71332	10.7994	12.9164	12.2548	20.3738
chrV:7241402-7241566	CELE1	NA	NA	NA	NA	NA	NA	NA	NA	-0.733493	0.0380227	0.319228	-0.991796	-0.00529648	0	0.821411	0.569767	4.25483	23.1781	3.95676	0	20.9423	0	12.285	7.60208	0	29.0039
chrV:7780031-7780394	CELE1	NA	NA	NA	NA	NA	NA	NA	NA	-0.00669806	-0.221148	-0.382127	-0.222901	-0.0610936	-0.104114	-0.010814	0.426139	1.9287	0	0	0	1.38681	1.29651	1.90773	5.04539	2.61494	2.69897
chrV:7860159-7860472	CELE1	NA	NA	NA	NA	NA	NA	NA	NA	-0.00790261	-0.231604	0.437885	-0.232969	-0.244775	-0.417271	-0.38726	0.221352	2.21473	0	5.69132	0	0	0	0	3.85144	3.03133	3.12874
chrV:8037271-8037559	CELE1	NA	NA	NA	NA	NA	NA	NA	NA	-0.154231	-0.26497	0.300325	-0.631944	-0.064293	0.418021	-0.635998	0.477362	12.0545	10.1335	7.8492	5.18731	13.5682	9.43866	0	10.228	6.29442	20.0681
chrV:8037667-8037771	CELE1	NA	NA	NA	NA	NA	NA	NA	NA	-0.0136302	-0.193864	0.477167	-0.456701	0.355959	-0.314972	-0.620581	-0.0728239	13.3723	7.39793	28.6385	0	27.7297	6.24751	0	11.0891	17.3246	18.7129
chrV:8133886-8134197	CELE1	NA	NA	1	NA	NA	NA	NA	NA	-0.309629	-0.4411	0.823545	-0.128702	0.190053	0.376883	0.151872	0.894271	8.93694	7.08754	21.9182	11.7991	17.1715	13.8706	10.7681	23.2568	11.7964	18.5887
chrV:8300115-8300342	CELE1	0.98709	0.981821	1	0.922388	0.790317	0.999728	NA	NA	-0.685519	0.124664	0.63943	-0.271914	0.349624	0.792842	0.156132	0.182682	42.9629	87.8107	54.1141	62.5424	105.048	61.8894	35.8085	36.5372	41.0053	106.474
chrV:8711060-8711417	CELE1	NA	NA	NA	NA	NA	NA	NA	NA	0	0.334987	0	0	0	0.313235	0	0.307142	0	2.16978	0	0	0	1.83237	0	1.75188	0	0
chrV:9579409-9579563	CELE1	NA	NA	NA	NA	NA	NA	NA	NA	0	0	0.255853	0.318963	0	0	0.295654	0	0	0	3.65874	4.40678	0	0	4.4801	0	0	0
chrV:9927412-9927565	CELE1	NA	NA	NA	NA	NA	NA	NA	NA	0.532184	0.0086137	0.372701	0.0122555	0.241496	-1.24162	-1.15796	-1.21499	27.2665	9.31513	40.1663	9.73463	16.3896	4.25967	4.32667	4.07254	36.5353	12.3481
chrV:10125613-10125990	CELE1	NA	NA	NA	NA	NA	NA	NA	NA	0.435426	0.173797	0.802155	0.325431	-0.0054431	0.318048	-0.605027	0.275727	9.23379	5.69258	12.6829	7.75595	4.00634	6.94168	0	6.16063	5.03617	5.19802
chrV:10143419-10143580	CELE1	NA	NA	NA	NA	NA	NA	NA	NA	0	0.326125	0	0	0	0	0	0.406893	0	4.42756	0	0	0	0	0	3.87143	0	0
chrV:10436185-10436545	CELE1	NA	NA	NA	NA	NA	NA	NA	NA	-0.325255	-0.320798	-0.294021	-0.323651	-0.341653	-0.0706832	-0.289522	-0.294325	0	0	0	0	0	1.30729	0	0	2.51951	2.6338
chrV:10768834-10769108	CELE1	NA	NA	NA	NA	NA	NA	NA	NA	-0.289894	-0.256923	-0.0565753	-0.00903509	-0.267566	-0.197599	-0.853049	0.367891	10.2116	10.6494	7.12217	15.3867	10.7297	5.14834	0	12.8657	10.2299	20.9748
chrV:11685820-11686019	CELE1	NA	NA	NA	NA	NA	NA	NA	NA	0.260268	0.501116	-1.17144	0	0.521246	-1.1844	-1.15504	-0.288588	3.47713	7.47023	0	0	7.37669	0	0	8.95766	18.6138	0
chrV:12015836-12016118	CELE1	NA	NA	NA	NA	NA	NA	NA	NA	-0.00938824	0.0187042	0.0977373	0.162528	0.356564	-0.00484055	-0.2663	0.547123	4.91467	5.27932	8.6217	7.24083	10.2884	7.32079	4.90753	14.7182	9.9407	6.71946
chrV:12029818-12030169	CELE1	0.98709	NA	1	NA	NA	NA	NA	NA	-0.302502	-0.724698	-0.289026	-0.300345	0.311642	-0.0739596	0.199676	0.344812	17.856	10.5266	11.7649	17.6533	32.9756	14.4529	19.4881	22.14	21.1521	33.1324
chrV:12124024-12124280	CELE1	NA	NA	NA	NA	NA	NA	NA	NA	0.197485	0.00559815	-0.534247	-0.24754	0.356432	-0.545833	-0.506483	-0.304301	5.41187	2.79091	2.54033	0	7.55284	2.55249	2.702	4.53058	10.9464	3.69962
chrV:12199085-12199239	CELE1	NA	NA	1	NA	NA	NA	NA	NA	-0.636306	-0.719047	0.312501	-1.08373	-0.590869	-0.056217	-0.974139	-0.438559	27.0051	24.2895	43.0126	13.6495	28.8069	30.2951	8.77885	19.3605	41.8948	74.6306
chrV:12379594-12379965	CELE1	NA	NA	NA	NA	NA	NA	NA	NA	0	0	-0.0386623	0.329288	0	-0.300245	-0.291972	-0.297042	0	0	1.52448	2.01496	0	0	0	0	2.44501	0
chrV:12907089-12907453	CELE1	NA	NA	NA	NA	NA	NA	NA	NA	0	0	-0.312697	0.432055	0.334148	-0.317466	-0.0156068	0.168535	0	0	0	3.92498	2.76602	0	1.8255	3.19003	2.60777	0
chrV:13181741-13182048	CELE1	NA	NA	NA	NA	NA	NA	NA	NA	-0.535895	-0.531841	0.535562	-0.534429	-0.137721	0.629731	0	0.285738	0	0	3.96094	0	4.53644	4.59673	0	1.89019	0	9.26107
chrV:13966042-13966204	CELE1	NA	NA	NA	NA	NA	NA	NA	NA	0	0.24855	-0.303085	0	0.178311	-0.0791464	-0.298471	-0.0296688	0	4.4004	0	0	2.85731	2.89528	0	3.84768	5.83949	0
chrV:14192330-14192640	CELE1	NA	NA	NA	NA	NA	NA	NA	NA	0.541019	-0.255432	0.18055	-0.258992	-0.290654	-0.360901	-0.343921	0.199661	8.96567	0	3.64698	0	0	0	0	3.88859	3.06057	3.05725
chrV:14600330-14600447	CELE1	NA	NA	NA	NA	NA	NA	NA	NA	0.214934	0	0.294388	0.212084	0.151629	0.31891	0	0	5.94955	0	4.80597	5.78857	3.94696	5.55923	0	0	0	0
chrV:14609383-14609728	CELE1	NA	NA	NA	NA	NA	NA	NA	NA	0.197251	0.00550694	0.399339	-0.244143	0.358884	-0.0549087	0.261668	0.419216	4.05807	2.07302	4.9171	0	5.72294	1.89592	3.93272	5.17784	2.75097	2.74799
chrV:14997355-14997536	CELE1	NA	NA	NA	NA	NA	NA	NA	NA	0	0	0	0	0.261956	0	0.289684	0	0	0	0	0	2.55902	0	3.81547	0	0	0
chrV:15133097-15133408	CELE1	NA	NA	NA	NA	NA	NA	NA	NA	-0.0073396	-0.231465	0.294388	0.00301824	-0.0691941	0.31891	0	0	2.25015	0	1.81764	2.40246	1.61794	2.10253	0	0	0	3.1488
chrV:15537070-15537372	CELE1	NA	NA	NA	NA	NA	NA	NA	NA	NA	NA	0.30103	NA	NA	0.261758	0	0	0	0	1.87163	0	0	1.55753	0	0	0	0
chrV:15552052-15552381	CELE1	NA	NA	NA	NA	NA	NA	NA	NA	-0.0158158	-0.683078	0.828691	-0.207463	-0.0449202	0.634057	0.277209	-0.421552	6.36218	0	9.37214	4.1397	5.88206	7.39363	4.03822	0	2.75619	8.83531
chrV:15771237-15771387	CELE1	NA	NA	NA	NA	NA	NA	NA	NA	0.226846	0.24445	-0.330847	0.224379	0.155297	0.203824	-0.320082	-0.0502439	4.64932	5.14425	0	4.52352	3.08438	8.68859	0	3.85549	6.30356	0
chrV:16544098-16544402	CELE1	0.98709	NA	1	NA	NA	0.999728	0.40871	NA	0.0311602	0.222452	-0.472873	0.538213	-0.325035	-0.489269	-1.11001	-0.478358	41.2586	48.79	45.8583	64.1742	30.0379	45.321	26.7683	45.6723	88.4225	53.825
chrV:16552340-16552678	CELE1	NA	NA	NA	NA	NA	NA	NA	NA	-1.39532	-0.0950355	-0.0559855	-0.887584	-0.295201	0.826893	0.26367	-0.382968	0	14.9863	1.67288	4.22601	11.4518	9.43865	3.93101	0	2.68302	22.6244
chrV:16553143-16553208	CELE1	NA	NA	NA	NA	NA	NA	NA	NA	0.215411	-0.273861	0.468672	0.584527	-0.115962	0.411673	0.523544	0.258608	21.1738	0	17.185	43.4126	7.05669	14.3009	20.1911	8.8209	0	14.8852
chrV:16744211-16744532	CELE1	NA	NA	NA	NA	NA	NA	NA	NA	-0.449563	0.846301	-0.554855	0.18293	-0.230162	-0.269111	-0.546978	-0.0711151	2.18027	20.972	0	9.10481	4.4605	2.03723	0	3.61602	5.91203	8.95662
chrV:16767324-16767634	CELE1	NA	NA	NA	NA	NA	NA	NA	NA	0.344063	0.215945	-0.0584793	-0.498395	0.507445	0.186165	0.506682	0.232819	9.00825	7.3017	1.82349	0	11.2364	3.62675	6.60816	4.03326	2.92458	6.21617
chrV:16916599-16916870	CELE1	NA	NA	NA	NA	NA	NA	NA	NA	0.536384	-0.260121	-0.627674	-0.263697	-0.295505	-0.140481	-0.615647	-0.316219	10.2512	0	0	0	0	3.47008	0	2.14037	6.84331	3.61186
chrV:17241191-17241295	CELE1	NA	NA	NA	NA	NA	NA	NA	NA	NA	NA	NA	NA	NA	NA	NA	NA	0	0	0	0	0	0	0	0	0	0
chrV:18880833-18881030	CELE1	NA	NA	NA	NA	NA	NA	NA	NA	0.458658	0.744936	0.504708	-0.0172435	0.460035	-0.425811	-0.0118016	-0.0768316	17.695	26.5602	14.754	6.89951	17.6492	2.38349	6.87233	6.10784	9.18731	9.92349
chrV:20207879-20208024	CELE1	NA	NA	NA	NA	NA	NA	NA	NA	0	0.220854	0	0.212804	0.152107	0	0.325955	0.297065	0	4.91277	0	4.67843	3.19001	0	4.56374	3.98753	0	0
chrV:20432117-20432255	CELE1	NA	NA	NA	NA	NA	NA	NA	NA	-0.00943041	-0.249939	0.232386	0.00296501	0.0855283	-0.416917	0.520054	-0.0544284	5.00306	0	8.77677	5.39256	6.9823	0	14.7852	4.18834	6.54348	7.06781
chrV:20848244-20848594	CELE1	NA	NA	NA	NA	NA	NA	NA	NA	-0.988603	-0.0742211	0.406381	-0.0216492	-1.21751	0.901565	-0.26963	1.00088	5.98154	20.774	9.93844	21.9747	4.31452	16.8874	3.8767	18.7577	7.89437	30.4279
chrV:20849908-20850249	CELE1	NA	NA	1	NA	NA	NA	NA	NA	-0.936636	-0.397443	-0.812142	-0.923075	-1.36715	-1.09693	-0.70483	-0.377807	10.2445	19.5715	8.79253	10.3751	5.56147	6.05784	9.98789	14.1445	27.2132	39.3841
chrV:102126-102445	CELE1	NA	NA	NA	NA	NA	NA	NA	NA	-0.272306	-0.983423	-0.0570813	-0.987849	-0.932377	0.171658	-0.349271	0.189488	10.9074	2.24145	1.7722	2.34239	3.15499	3.52475	0	3.63862	2.97449	21.1941
chrV:121869-122161	CELE1	0.98709	NA	1	NA	NA	0.999728	NA	NA	-0.278158	0.111389	0.26473	-0.0956624	0.245955	0.132482	0.551821	0.646066	26.1759	38.3451	24.9823	31.2141	43.0615	21.841	32.2209	35.0068	25.7	46.2943
chrV:163464-163778	CELE1	0.98709	NA	1	NA	NA	NA	NA	NA	-0.738308	-0.67373	0.889119	0.061024	0.203572	0.394599	-0.186221	0.857743	13.2882	14.418	35.6731	31.4136	35.7424	22.9824	12.87	34.4101	20.7491	39.9422
chrV:197356-197723	CELE1	NA	NA	NA	NA	NA	NA	NA	NA	0.268606	0.0163117	-0.115961	0.144713	-0.249129	0.0636291	0.624799	1.17626	11.4104	7.95809	3.08209	9.64208	5.38081	4.34742	9.20584	16.4314	5.0581	10.5067
chrV:363142-363351	CELE1	0.98709	0.956165	1	0.991108	0.996996	0.999728	0.968224	0.979235	-0.0317775	-0.359682	0.141452	0.0339133	-0.00613448	0.0326076	0.192641	-0.159847	126.375	97.0378	90.658	133.504	128.847	83.6895	94.1554	70.3783	106.767	173.707
chrV:692048-692324	CELE1	NA	NA	NA	NA	NA	NA	NA	NA	0.248471	0.478552	-0.325571	0.24786	0.166306	-0.0498284	-0.00841895	-0.308627	2.51056	5.39367	2.04731	2.46589	1.68138	4.73638	5.01383	2.26416	6.71979	0
chrV:902856-903017	CELE1	NA	NA	NA	NA	NA	NA	NA	NA	0.265454	0.702867	0.413557	0.498029	0.166358	0	0	0	4.29275	13.6501	4.03004	8.84332	2.87495	0	0	0	0	0
chrV:907178-907470	CELE1	NA	NA	NA	NA	NA	NA	NA	NA	-0.0240293	0.0222702	-0.345585	0.140313	0.149025	0.277941	0.507889	0.250013	11.9125	12.6463	4.16372	14.8955	14.8393	10.2923	14.0282	10.2419	9.74577	16.5491
chrV:977388-977679	CELE1	NA	NA	1	NA	NA	NA	NA	NA	-0.0192103	0.286741	0.00908355	-0.535051	-0.155778	-1.38482	-0.333177	-0.284991	11.976	17.8062	17.0056	4.67843	9.83755	2.24654	11.6981	12.2708	22.2387	16.4975
chrV:991371-991706	CELE1	0.98709	NA	1	NA	NA	NA	NA	NA	0.466059	0.159753	-0.133576	-0.132503	0.710402	-0.668711	-1.53065	-0.143383	24.9746	18.1405	16.4665	12.5933	31.3087	8.97513	1.98305	16.2636	24.7404	19.9966
chrV:1014384-1014585	CELE1	NA	NA	NA	NA	NA	NA	NA	NA	-0.914603	-0.674477	0.279028	-0.699811	-0.0456566	-1.06201	-0.028736	0.43046	6.95096	11.2417	14.8864	10.8029	26.3289	0	10.0348	17.7379	13.9268	38.2818
chrV:1150219-1150316	CELE1	NA	NA	NA	NA	NA	NA	NA	NA	NA	NA	0.301245	NA	NA	0	0	0.30586	0	0	5.78679	0	0	0	0	5.94061	0	0
chrV:1158475-1158824	CELE1	NA	NA	NA	NA	NA	NA	NA	NA	0.163307	0.193858	0.973736	-0.00646846	0.354793	0.61932	0.723417	0.648801	5.96079	6.31803	10.4569	4.09319	8.20732	6.97114	7.69524	7.03913	2.71953	5.61386
chrV:1199193-1199303	CELE1	NA	NA	NA	NA	NA	NA	NA	NA	NA	NA	0	NA	NA	0	0	0.406893	0	0	0	0	0	0	0	5.6502	0	0
chrV:1208346-1208537	CELE1	NA	NA	1	NA	NA	NA	NA	NA	-0.690169	-0.630874	-0.43037	-1.00078	-0.263221	0.423836	-0.572202	0.779072	18.2135	19.9187	13.6014	11.0191	30.7362	33.3302	10.7038	47.1231	28.8638	55.626
chrV:1214104-1214208	CELE1	NA	NA	NA	NA	NA	NA	NA	NA	0.139727	-0.363782	0.77999	0.171395	-0.0471834	-0.417042	0.499718	0.203043	26.5555	6.83109	28.6385	28.5549	18.4865	0	19.305	11.0891	8.66232	27.1658
chrV:1259700-1260041	CELE1	NA	NA	NA	NA	NA	NA	NA	NA	-0.325255	-0.320798	-0.041984	-0.323651	-0.341653	-0.38385	-0.00320461	0.468507	0	0	3.81793	0	0	1.37992	4.06091	8.64295	5.31897	2.78013
chrV:1261156-1261477	CELE1	NA	NA	NA	NA	NA	NA	NA	NA	0.208824	-0.266742	-0.586643	0.00281487	0.0876274	-0.208698	-0.532426	-0.0930606	4.33998	0	1.7612	2.32785	3.0141	4.39687	2.06927	5.70349	8.86805	3.05101
chrV:1372097-1372382	CELE1	NA	NA	NA	NA	NA	NA	NA	NA	-0.192724	-0.414817	0.192674	-0.182179	-0.26769	-0.367318	0.258575	-0.0316563	2.45471	0	3.96577	2.62086	1.62847	0	4.75777	2.19291	3.18022	6.64897
chrV:1374207-1374426	CELE1	0.98709	NA	1	NA	NA	NA	NA	NA	-0.491992	0.266208	-0.15923	0.128952	0.809637	-0.656735	-0.994864	-0.0581876	9.54327	26.894	24.759	23.2452	46.2325	14.5441	9.34153	27.2808	38.5543	26.5059
chrV:1436566-1436708	CELE1	NA	NA	NA	NA	NA	NA	NA	NA	NA	NA	NA	NA	NA	NA	NA	NA	0	0	0	0	0	0	0	0	0	0
chrV:1476975-1477257	CELE1	NA	NA	NA	NA	NA	NA	NA	NA	0.413838	-0.100219	0.216548	-0.14659	-0.0823172	-0.373498	0.316501	-0.126407	24.7137	13.3034	12.9326	12.3031	13.7179	6.30356	14.5239	8.54665	13.3041	20.2701
chrV:1697141-1697428	CELE1	NA	NA	NA	NA	NA	NA	NA	NA	-0.495142	-0.218871	-0.0777247	-0.216978	-0.13193	0.946225	1.23829	0.227727	0	2.4905	1.96911	2.60266	3.36993	11.7492	16.4877	4.19914	3.15814	6.7126
chrV:1697693-1697851	CELE1	NA	NA	1	NA	NA	NA	NA	NA	-0.504234	-0.118813	-0.909676	-0.706142	-0.842815	0.614787	0.516849	-1.66095	8.83078	19.1674	14.8062	4.71425	2.92919	68.6232	63.743	3.66151	53.0796	30.695
chrV:1766432-1766802	CELE1	NA	NA	1	NA	NA	NA	NA	NA	-0.285249	0.256582	0.780672	-0.598613	-0.0270878	-0.182898	-0.406229	0.382229	9.4437	18.3625	21.4897	5.70261	13.0801	7.8486	5.61522	14.3655	12.6	18.2806
chrV:1769684-1770087	CELE1	NA	NA	NA	NA	NA	NA	NA	NA	-0.24636	0.396472	0.632027	0.184397	0.213989	-0.430119	-0.385502	0.627307	0	5.76818	6.03946	3.38144	3.65183	0	0	5.98689	2.35603	2.43175
chrV:1865674-1865855	CELE1	NA	NA	NA	NA	NA	NA	NA	NA	-0.00883236	0.767092	1.25986	0.19515	-0.00664596	0.388707	-0.0104871	0.842868	7.7148	28.2411	26.3413	11.99	8.10626	8.79039	3.81547	16.4884	4.99749	10.4484
chrV:1883532-1883726	CELE1	NA	NA	NA	NA	NA	NA	NA	NA	-0.00821567	1.04934	-0.314967	0.236112	0.240937	-0.093887	-0.657513	-0.677289	3.60024	26.6636	3.34803	7.34676	7.56584	5.78421	0	0	9.32866	4.87591
chrV:1893535-1893647	CELE1	NA	NA	NA	NA	NA	NA	NA	NA	NA	NA	0	NA	NA	0	0	0.395186	0	0	0	0	0	0	0	5.15203	0	0
chrV:1893777-1894060	CELE1	NA	NA	NA	NA	NA	NA	NA	NA	-0.43722	-0.700128	-0.338249	-0.199423	-0.176622	0.0856669	-0.0168604	-0.0868128	2.44868	0	2.29882	5.04443	5.19485	5.63328	4.79127	4.09986	6.55416	10.2664
chrV:2057016-2057287	CELE1	NA	NA	NA	NA	NA	NA	NA	NA	0.275739	0	1.10453	0	1.45957	-0.0615097	0.521277	-0.416899	2.55671	0	15.8558	0	21.409	2.41172	7.45231	0	3.34391	0
chrV:2139074-2139227	CELE1	NA	NA	NA	NA	NA	NA	NA	NA	0.500217	0.296456	0	0.509537	0.675452	0	0	0.527775	9.0745	5.04404	0	9.30271	12.6044	0	0	7.85293	0	0
chrV:2143424-2143681	CELE1	NA	NA	NA	NA	NA	NA	NA	NA	0.217061	0.233355	0.302128	0	0.162248	0	0	0.519448	2.72111	3.01078	2.53049	0	1.95658	0	0	4.68741	0	0
chrV:2379657-2379854	CELE1	NA	NA	NA	NA	NA	NA	NA	NA	-0.0201153	-0.611363	0.544312	-0.641906	-0.25827	0.460621	0	0.288338	21.2073	7.84628	6.16147	7.23544	15.0997	4.76698	0	2.9403	0	29.2913
chrV:2382383-2382560	CELE1	NA	NA	NA	NA	NA	NA	NA	NA	0.130641	-0.842965	-0.799938	-0.158244	0.863802	-0.552731	-0.737988	-0.289974	19.6832	0	3.18598	12.6331	46.2363	6.33663	3.90121	10.0648	20.6768	21.7217
chrV:2382827-2382995	CELE1	NA	NA	NA	NA	NA	NA	NA	NA	-1.37829	-1.11452	-0.848231	-0.796441	-0.313703	-0.204053	-0.788138	-0.110739	4.15412	9.19269	3.35565	16.5605	31.7012	12.2591	3.94264	14.3119	22.2784	62.2608
chrV:2487937-2488134	CELE1	NA	NA	NA	NA	NA	NA	NA	NA	-0.00698366	-0.183277	-0.255476	-0.440593	-0.120577	-0.552402	-0.443594	-1.12785	7.0245	3.92314	9.89191	0	4.90172	5.69657	7.01429	0	18.8018	9.60407
chrV:2490662-2490839	CELE1	NA	NA	NA	NA	NA	NA	NA	NA	0.228386	-0.491498	-0.895876	-0.319828	0.0701777	-0.94645	-1.53152	-0.911135	27.3854	8.05916	6.85377	11.8858	22.0293	6.33663	0	6.54135	31.3716	27.0633
chrV:2491106-2491274	CELE1	NA	NA	NA	NA	NA	NA	NA	NA	-0.734572	-0.684932	-0.302984	-0.238696	0.520915	-0.109516	-0.707415	0.0588887	12.384	13.4369	10.067	25.8247	56.9662	14.4373	3.94264	17.7567	21.7779	45.5698
chrV:2653682-2653993	CELE1	NA	NA	1	NA	NA	NA	NA	NA	-0.980279	-0.0532406	-0.458692	-0.0925625	-0.150525	-0.668746	-0.721026	-0.684974	4.47908	19.536	17.1834	18.5801	17.1715	13.8706	13.174	13.7828	35.6602	27.5284
chrV:2689862-2690168	CELE1	NA	NA	NA	NA	NA	NA	NA	NA	-0.651773	-0.388806	0.349456	-0.0130864	0.192286	-0.781875	0.442266	-0.373527	0	2.33637	7.66834	6.89143	9.73855	0	8.86464	2.0429	6.06313	9.60025
chrV:2692169-2692479	CELE1	0.98709	NA	1	NA	NA	NA	NA	NA	0.502186	0.147791	0.0299789	-0.470231	0.851891	-0.193268	-0.878769	-0.499556	24.7461	16.527	23.2607	6.58892	34.7045	18.4676	8.75062	13.8271	30.1977	18.5468
chrV:3208258-3208667	CELE1	NA	NA	NA	NA	NA	NA	NA	NA	-0.763629	-0.407253	-0.449284	-0.925951	-0.95805	-0.571092	-0.838793	0.24294	5.12078	9.32779	6.16025	3.65642	3.59839	5.05313	3.31883	13.1088	13.6199	20.9484
chrV:3211733-3212026	CELE1	0.98709	NA	1	NA	NA	NA	NA	NA	-0.0307188	-0.0678559	0.154112	-0.0990872	-0.304918	0.191855	0.829695	-0.719514	26.1094	25.0041	14.6693	24.3642	19.6741	15.3459	29.7494	3.96041	16.1877	36.2196
chrV:3212525-3212641	CELE1	NA	NA	NA	NA	NA	NA	NA	NA	0.212785	0.779395	0.0368328	0.425283	0.827902	0.383508	-0.447882	-0.09636	11.9442	32.6871	24.9683	18.6511	33.5147	38.5614	11.8703	21.4418	31.8185	8.3968
chrV:3593022-3593335	CELE1	NA	NA	NA	NA	NA	NA	NA	NA	-0.00278142	-0.226292	0.605857	-0.00525778	-0.06408	-0.053067	-0.0120157	0.210399	2.23582	0	8.04364	2.17532	1.60764	2.08914	2.21151	3.99472	3.03133	3.02804
chrV:3630508-3630862	CELE1	NA	NA	NA	NA	NA	NA	NA	NA	0.373541	0	0.189807	0	0.290729	0.352823	-0.33787	-0.349331	3.95519	0	3.19496	0	2.84394	4.50662	0	0	2.5621	0
chrV:3694284-3694455	CELE1	NA	NA	NA	NA	NA	NA	NA	NA	-0.398745	0.0228794	0.712056	-0.911082	0.508917	-0.143604	-0.715869	0.943788	8.12484	17.3726	21.7772	0	31.1483	6.55767	0	27.6013	10.822	22.4794
chrV:3694535-3694657	CELE1	NA	NA	NA	NA	NA	NA	NA	NA	-0.594036	-0.580619	-0.0496342	-0.861096	-0.200998	-0.322889	0.228912	-0.318295	5.7077	5.83142	4.61061	0	15.7811	0	11.2913	0	7.73851	31.4346
chrV:3694653-3694696	CELE1	NA	NA	NA	NA	NA	NA	NA	NA	0.443059	0.461863	NA	0	0	NA	NA	NA	31.9112	33.9556	0	0	0	0	0	0	0	0
chrV:3694725-3694879	CELE1	NA	NA	NA	NA	NA	NA	NA	NA	-0.810608	-0.316604	-0.30086	-0.808194	-0.846241	-0.876565	-0.506847	-0.86611	0	10.023	7.31748	0	0	0	4.29875	0	17.8769	25.1489
chrV:3709369-3709654	CELE1	NA	NA	1	NA	NA	NA	NA	NA	-0.286284	-0.244608	-0.758902	-0.000497573	0.474062	-1.08228	-0.671708	-0.760868	12.2272	12.7477	10.814	17.6483	29.0496	6.60044	11.9436	10.8072	32.3937	23.6031
chrV:3753945-3754214	CELE1	NA	NA	NA	NA	NA	NA	NA	NA	0.152654	-0.184726	-0.312714	-0.0170841	0.123594	-0.600677	-0.261136	-0.602208	7.80052	2.87697	4.51841	5.05964	7.18919	2.42959	4.9356	2.15622	10.2627	7.27722
chrV:4142642-4142972	CELE1	NA	NA	NA	NA	NA	NA	NA	NA	-0.269668	0.568162	0.616234	-0.0103489	-0.308171	0	0	0.590705	0	8.84766	3.94481	2.0636	0	0	0	3.65363	0	2.96805
chrV:4148601-4148955	CELE1	NA	NA	NA	NA	NA	NA	NA	NA	0.376628	0.711144	0.327501	-0.010338	0.581773	-0.131107	-0.317392	-0.0887357	5.93279	10.6053	6.6315	1.92409	8.42179	3.17724	1.9561	3.40662	5.36246	2.76739
chrV:4178299-4178513	CELE1	0.98709	NA	1	NA	NA	0.999728	NA	NA	-0.263561	-0.261745	-0.678273	-0.435032	-0.616744	0.334022	-0.0453002	-0.0274647	58.4989	58.3749	22.6971	50.1297	42.4302	56.4782	41.2035	41.6635	56.9628	99.2035
chrV:4207715-4208000	CELE1	NA	NA	NA	NA	NA	NA	NA	NA	0.566322	0.933131	-0.314915	-0.208908	0.391214	-0.0294002	0.176864	0.0899963	17.1367	26.1197	3.96577	4.77658	13.7106	6.60044	9.51554	8.29969	9.54067	10.084
chrV:4342081-4342352	CELE1	0.98709	NA	1	NA	NA	NA	NA	NA	0.387507	0.148526	0.174888	-0.133931	0.458826	-0.0625706	-0.28451	-0.0440802	28.2699	21.9713	27.857	15.8009	29.9704	21.7922	17.4576	22.3961	30.8726	24.9342
chrV:4344733-4344922	CELE1	NA	NA	NA	NA	NA	NA	NA	NA	-0.667555	-0.439184	-0.140291	-0.454166	-0.277827	-0.531471	-0.589499	-0.672785	7.32027	11.6385	18.8113	11.4852	15.1188	11.8728	10.8165	9.66591	29.6128	30.5247
chrV:4350564-4350906	CELE1	NA	NA	NA	NA	NA	NA	NA	NA	0.467216	0.49123	0.309527	0	0.505939	0.0750742	-0.0186649	-0.368043	4.05496	4.35582	6.61347	0	4.30128	4.66429	3.96712	1.69732	5.42677	0
chrV:4352760-4353088	CELE1	NA	NA	NA	NA	NA	NA	NA	NA	-0.223578	-0.220898	0.561587	-0.0095126	-0.0702859	0.315782	0.335129	0	0	0	3.70812	2.07614	1.41563	1.99389	2.02525	0	0	2.98609
chrV:4367937-4368280	CELE1	NA	NA	NA	NA	NA	NA	NA	NA	-0.810608	-0.316604	-0.0494603	-0.808194	-0.846241	-0.368277	-0.345889	0.2007	0	4.51618	1.64856	0	0	0	0	3.38477	2.64402	11.3316
chrV:4444911-4445431	CELE1	NA	NA	NA	NA	NA	NA	NA	NA	-0.826171	-0.614995	0.0699342	-0.344769	-0.631104	-0.990271	-0.252492	0.552235	4.01708	5.62107	4.35397	8.24924	5.66349	0	2.6657	8.16742	5.31847	16.6067
chrV:4447166-4447459	CELE1	NA	NA	1	NA	NA	NA	NA	NA	-0.263621	-0.512884	-0.287292	0.00153119	-0.540008	0.0754829	0.0782478	0.430063	14.2374	9.96114	14.3776	19.7176	10.0363	20.7875	20.684	28.641	25.4688	26.3024
chrV:4447963-4448076	CELE1	NA	NA	NA	NA	NA	NA	NA	NA	-0.309839	-0.648473	-0.297257	0.105027	-0.542831	-0.0497365	-0.771712	0.0508352	24.5171	12.5836	16.4284	43.1087	17.027	22.3133	6.09136	25.9289	32.6558	51.1518
chrV:4448280-4448418	CELE1	0.98709	NA	1	NA	NA	NA	NA	NA	0.879717	0.310026	-0.470786	1.12488	0.621689	-0.481196	-0.535475	-0.159718	60.3702	31.3893	32.2612	77.0602	46.0874	31.134	29.3681	43.1782	66.9561	27.5887
chrV:4517253-4517579	CELE1	0.98709	NA	1	NA	NA	0.999728	0.95452	NA	0.064782	0.835853	0.0235232	0.676374	1.32318	0.410835	0.257468	-0.567806	23.5555	47.883	39.829	41.7221	71.3517	54.063	47.8971	23.8327	51.36	29.4634
chrV:4521009-4521200	CELE1	NA	NA	NA	NA	NA	NA	NA	NA	-0.540274	-0.510573	-1.5844	-1.0457	-0.252667	-0.673208	-1.55565	-1.58617	7.2785	7.78149	0	0	12.3321	9.29119	0	0	29.0841	25.2546
chrV:4535470-4535555	CELE1	NA	NA	1	NA	NA	NA	NA	NA	0.743981	1.0397	0.33443	-0.286742	0.231005	-0.0701717	-1.13445	0.56086	40.5857	59.7661	49.1514	0	17.1551	29.5781	0	62.4953	44.2715	11.4235
chrV:4544765-4545054	CELE1	NA	NA	NA	NA	NA	NA	NA	NA	0.328197	0.0166827	-0.311725	0.343921	0.376838	0.102146	-0.245047	0.239862	9.59208	5.15189	4.2068	9.88012	10.3094	9.04812	4.78907	10.503	9.84659	6.66631
chrV:4548349-4548650	CELE1	NA	NA	NA	NA	NA	NA	NA	NA	0.202365	-0.245862	-0.371903	0.391656	-0.0956679	-0.422473	-0.312394	-0.0753071	4.64932	0	1.87783	7.22577	1.54219	1.56269	2.29939	4.00447	6.16351	3.14836
chrV:4567283-4567489	CELE1	NA	NA	1	NA	NA	NA	NA	NA	-0.55697	-0.31698	0.288884	0.13173	1.01069	1.46331	1.51239	2.33372	6.75108	10.6827	2.73964	20.7626	51.952	18.6265	19.8564	43.4911	0	23.5773
chrV:4569273-4569396	CELE1	NA	NA	NA	NA	NA	NA	NA	NA	-0.279481	-1.01025	-0.245013	-0.58619	-0.666688	-0.728948	-0.35829	-0.890029	28.2016	5.78439	25.6336	17.5983	15.3389	12.902	21.9471	9.75283	44.3513	54.4394
chrV:4582804-4583079	CELE1	NA	NA	NA	NA	NA	NA	NA	NA	0.172541	-0.203273	-0.0616541	-0.00239041	0.0175042	-0.0765123	-0.0259003	0.457731	7.58297	2.81443	7.09637	5.19064	5.48694	7.13031	7.3443	14.7654	10.1928	7.00445
chrV:4585942-4586299	CELE1	NA	NA	NA	NA	NA	NA	NA	NA	0.66716	0.699108	0.293319	0.989997	0.873692	-0.393518	-0.515584	-0.0873414	5.82759	6.17685	8.87868	9.91141	8.13302	2.63649	1.93971	5.00428	7.62188	0
chrV:4628240-4628395	CELE1	0.810608	0.731829	1	0.229868	0.000305048	0.045157	0.0228094	0.000333176	0.769382	0.545546	0.711476	0.842226	1.62707	1.17471	1.20049	1.67094	430.331	363.935	305.33	452.777	810.073	424.679	436.489	611.563	238.639	322.205
chrV:4758984-4759336	CELE1	NA	NA	NA	NA	NA	NA	NA	NA	-0.00946335	-0.249873	0.459131	-0.25357	0.360055	0	0	0.268782	1.97004	0	3.21306	0	5.49881	0	0	1.77669	0	2.78307
chrV:4817722-4818074	CELE1	0.98709	NA	1	NA	NA	0.999728	NA	NA	-0.290978	0.112692	-0.35463	-1.01626	0.0334447	-0.577269	-0.549568	-0.161877	19.7755	29.627	18.6436	7.92838	27.0515	14.9334	15.5782	22.4597	34.3346	35.6425
chrV:5113779-5114132	CELE1	0.98709	NA	1	NA	NA	0.999728	NA	NA	0.745393	0.815426	-0.225277	0.546114	0.686999	-0.638263	-0.461728	-0.803854	27.6523	29.7114	26.2102	22.9158	25.9904	17.5575	21.1015	15.3096	41.9456	16.294
chrV:5217083-5217444	CELE1	NA	NA	NA	NA	NA	NA	NA	NA	-0.545355	-0.533312	-0.298207	-0.545793	-0.308333	-0.582079	-0.489779	-0.268867	1.93936	1.98139	3.13318	1.88688	4.18341	1.30368	1.84063	3.46504	7.65449	10.6808
chrV:5423886-5423970	CELE1	NA	NA	NA	NA	NA	NA	NA	NA	-1.03085	-0.728546	-0.625769	-1.02622	-0.107019	-0.36074	-0.274906	-0.0452321	0	9.13861	0	0	34.2544	5.55213	7.8389	14.757	21.401	56.6737
chrV:5501809-5502162	CELE1	NA	NA	NA	NA	NA	NA	NA	NA	-0.250331	0.554767	-0.607857	-0.00570098	0.336049	0.289044	0.638105	-0.33945	0	8.44094	1.84425	1.92952	5.26262	8.51877	13.255	3.41625	7.94694	2.68589
chrV:5538231-5538506	CELE1	NA	NA	NA	NA	NA	NA	NA	NA	-0.249598	0.21219	-0.353219	0.00279642	0.207719	-0.707029	-0.00920155	-0.349662	0	5.41321	2.05473	2.71582	5.06241	0	5.03199	2.10935	6.74413	3.55951
chrV:5581594-5581742	CELE1	NA	NA	NA	NA	NA	NA	NA	NA	-0.399366	0.0148808	0.323046	-0.398641	-0.498835	-0.636383	-0.603155	-0.0471916	4.66729	15.2405	16.3754	4.58424	3.12578	0	0	8.41841	12.2086	19.7804
chrV:5669109-5669385	CELE1	NA	NA	NA	NA	NA	NA	NA	NA	NA	NA	0.294388	NA	NA	0.31891	0	0	0	0	2.04731	0	0	2.36819	0	0	0	0
chrV:5688337-5688658	CELE1	NA	NA	NA	NA	NA	NA	NA	NA	0.240661	0	-0.597208	0.251463	0.47355	-0.955336	0.168331	-0.593865	2.18027	0	1.7612	2.32785	4.4605	0	8.36439	1.80801	8.7367	0
chrV:5754012-5754352	CELE1	NA	NA	NA	NA	NA	NA	NA	NA	-0.220843	0.0140039	0	-0.219839	-0.0665699	0	0.610568	0	0	2.27795	0	0	1.36581	0	3.99039	0	0	2.78828
chrV:5825111-5825243	CELE1	NA	NA	NA	NA	NA	NA	NA	NA	NA	NA	NA	NA	NA	NA	NA	NA	0	0	0	0	0	0	0	0	0	0
chrV:5948583-5948852	CELE1	0.98709	NA	1	NA	NA	NA	NA	NA	-0.0335385	-0.0879865	-0.0124839	-0.598647	0.40214	-1.1762	-0.0363408	-1.33487	23.328	21.6932	23.2273	10.612	37.2369	5.92538	22.5225	4.47908	30.9447	32.7475
chrV:6050679-6050842	CELE1	NA	NA	NA	NA	NA	NA	NA	NA	-0.0135543	0.278258	-0.858154	-0.375628	-0.473287	-0.871422	-0.500489	-0.0911869	12.8423	21.8678	0	4.16495	3.07804	0	4.23424	10.924	17.4117	17.7784
chrV:6095196-6095402	CELE1	NA	NA	NA	NA	NA	NA	NA	NA	NA	NA	-0.338517	NA	NA	-0.341689	-0.334306	-0.0306394	0	0	0	0	0	0	0	3.02982	4.59825	0
chrV:6258081-6258449	CELE1	NA	NA	1	NA	NA	NA	NA	NA	-0.434757	-0.247201	0.354777	-0.0114541	0.118468	0.0169004	-0.383644	0.116776	5.67181	7.93652	14.7615	11.467	13.6802	10.1677	5.41713	11.0441	12.7829	15.7173
chrV:6705347-6705519	CELE1	0.98709	NA	1	NA	NA	0.999728	NA	NA	-0.10527	-0.112149	0.260977	-0.530758	-0.0401136	-0.299073	-0.129811	0.476282	52.2957	52.1607	60.9881	32.7396	55.6491	38.5185	43.3412	74.5703	64.5566	78.2231
chrV:6841076-6841234	CELE1	NA	NA	NA	NA	NA	NA	NA	NA	-0.214877	0.349538	0.545828	-0.465612	-0.51056	-0.0425777	-0.350432	0.199458	4.41539	18.4187	14.2668	0	0	4.12572	0	7.60598	5.9864	11.9598
chrV:6841437-6841565	CELE1	NA	NA	NA	NA	NA	NA	NA	NA	-0.229369	0.00277084	0	-0.228597	-0.240408	0.490611	0.308031	0	0	5.56019	0	0	0	8.74357	5.16517	0	0	7.37057
chrV:7064225-7064563	CELE1	NA	NA	NA	NA	NA	NA	NA	NA	-0.91996	-0.207403	0.159712	-0.247177	-0.417527	0.0759121	-0.702776	0.140606	4.12234	13.2217	5.52459	12.4818	10.0779	4.71933	0	5.28475	5.61556	22.6244
chrV:7216926-7217081	CELE1	NA	NA	1	NA	NA	NA	NA	NA	0.412999	0.921799	0.441868	0.592191	1.17674	0.476456	0.812668	0.692625	13.416	28.7317	24.0107	17.9405	37.8292	24.716	35.2507	31.009	17.7623	6.09489
chrV:7224524-7224659	CELE1	NA	NA	1	NA	NA	NA	NA	NA	-0.231406	-0.41846	0.64199	-0.740036	-0.541744	-0.021812	-0.0339084	0.284789	41.0535	32.9569	51.5441	21.557	28.5453	26.234	24.9099	35.5692	34.372	71.0746
chrV:7241799-7242192	CELE1	NA	NA	NA	NA	NA	NA	NA	NA	-0.497139	0.355218	0.796525	-0.493774	-0.142564	0.554416	0	0.598184	0	7.43294	4.53573	0	2.4633	2.86274	0	3.18361	0	4.98693
chrV:7571530-7571858	CELE1	NA	NA	NA	NA	NA	NA	NA	NA	-0.555014	-0.375592	1.48495	-0.709151	-0.0954427	0.736529	0.275696	1.33857	6.36139	8.72054	19.0619	4.55663	13.3342	8.2911	4.13593	16.1994	2.89312	20.8065
chrV:8134224-8134311	CELE1	NA	NA	NA	NA	NA	NA	NA	NA	0.195556	0.00519364	-0.0502026	-0.244829	0.222807	-0.0905105	0.236868	0.184966	15.8051	8.15074	6.44437	0	16.3214	5.36285	15.1433	13.2314	10.3357	10.8046
chrV:8183759-8184150	CELE1	NA	NA	NA	NA	NA	NA	NA	NA	0.367095	0.00201148	0.667146	0.393241	-0.0994522	0.385958	0.283234	-0.412502	5.33903	1.82976	6.44312	5.73648	1.28775	4.08125	3.47123	0	2.32027	2.50619
chrV:8298348-8298700	CELE1	NA	NA	NA	NA	NA	NA	NA	NA	0.562857	0.0145451	-0.0828567	0.00223606	0.373777	-0.63257	-0.0209831	-0.0530735	7.91769	2.20052	3.21306	2.12342	5.49881	0	3.77511	3.55338	5.27303	2.78307
chrV:8582888-8583047	CELE1	NA	NA	NA	NA	NA	NA	NA	NA	-0.701568	0.0148518	0	-0.41594	-0.0303155	0.317117	0.606638	0.31503	0	13.8207	0	4.68479	12.3759	4.09993	8.50451	3.91982	0	18.0252
chrV:8711604-8711700	CELE1	NA	NA	NA	NA	NA	NA	NA	NA	0	0	NA	0	0.261956	NA	NA	NA	0	0	0	0	4.80146	0	0	0	0	0
chrV:9556288-9556639	CELE1	0.98709	0.910139	1	0.528601	0.338798	0.999728	0.98883	0.982774	-0.394853	-0.491468	-0.238716	-0.791564	-0.835134	-0.234556	0.0862163	-0.110477	59.6078	55.0088	45.9359	42.8288	41.5802	47.4749	59.8782	51.0236	73.912	110.022
chrV:10007801-10008040	CELE1	NA	NA	NA	NA	NA	NA	NA	NA	0	0	NA	0	0.271038	NA	NA	NA	0	0	0	0	2.10333	0	0	0	0	0
chrV:10336167-10336496	CELE1	NA	NA	NA	NA	NA	NA	NA	NA	-0.184129	0.160958	0.171923	-0.184337	0.213363	0.650341	0.738818	0.144492	6.34212	11.048	5.93514	6.20956	11.7641	11.3693	12.3702	5.56522	5.64055	11.7165
chrV:10538195-10538341	CELE1	NA	NA	NA	NA	NA	NA	NA	NA	-0.4431	-0.440914	0	-0.442311	-0.454504	0	0	0	0	0	0	0	0	0	0	0	0	12.9361
chrV:10600961-10601100	CELE1	NA	NA	NA	NA	NA	NA	NA	NA	0.33429	0.0191776	0.817359	-0.00974743	-0.0021066	0.708932	0.904241	-0.068825	19.9166	10.6718	21.4789	9.75787	10.2592	18.1694	24.1982	4.4798	6.79884	13.5829
chrV:10968983-10969390	CELE1	NA	NA	NA	NA	NA	NA	NA	NA	-1.01962	-1.00992	1.37847	-1.01613	-0.347676	0.29292	0.329757	0.535078	0	0	10.9909	0	4.66182	1.60782	1.6331	2.85382	0	11.807
chrV:11129495-11129834	CELE1	0.98709	NA	1	NA	NA	NA	NA	NA	0.872091	0.278331	-0.82094	1.03464	0.936903	-0.00549284	-0.591364	-0.345961	28.7325	14.9423	11.0167	33.7086	30.4895	24.3739	13.8834	18.0492	33.2211	14.1684
chrV:11245166-11245551	CELE1	0.98709	NA	1	NA	NA	NA	NA	NA	-0.686616	-0.740187	-0.290198	-0.916564	-0.811075	-0.536429	-0.419229	-1.05311	14.4816	13.6242	11.9756	10.7897	12.6729	9.71988	10.5756	4.64127	21.8644	39.7392
chrV:11246154-11246536	CELE1	NA	NA	NA	NA	NA	NA	NA	NA	-0.602532	0.0235952	-0.0745881	-0.869524	-0.219815	-0.169549	-0.0240151	0.649743	1.81573	7.80181	3.1853	0	4.96612	2.46439	3.47941	9.35525	4.86	10.0126
chrV:11685423-11685533	CELE1	NA	NA	NA	NA	NA	NA	NA	NA	-0.24701	-0.244826	NA	-0.246222	-0.0612126	NA	NA	NA	0	0	0	0	4.54773	0	0	0	0	8.85068
chrV:11851327-11851500	CELE1	NA	NA	NA	NA	NA	NA	NA	NA	0.55151	0.00899162	0.311238	0.456051	0.557249	-0.219596	-0.236965	0.193634	28.0911	12.3666	23.3074	25.0826	27.8891	11.9068	11.6496	20.5923	21.6382	16.7566
chrV:11937076-11937385	CELE1	NA	NA	NA	NA	NA	NA	NA	NA	-0.737069	-0.702344	0.430567	-1.2051	-1.05528	-0.417866	-0.38192	0.203499	4.52933	5.0115	5.76476	0	1.62838	0	0	3.756	3.07044	21.8778
chrV:12286346-12286717	CELE1	NA	NA	NA	NA	NA	NA	NA	NA	-0.478987	-0.119883	-0.0963401	-0.66269	-0.278399	-0.300872	-0.404846	-0.121498	5.62607	9.80065	8.314	3.85112	7.82694	6.55886	5.449	7.94594	12.3387	15.5055
chrV:12973912-12974268	CELE1	NA	NA	NA	NA	NA	NA	NA	NA	0.173499	0.193229	0.062528	-0.22862	0.370519	-0.618552	-0.241638	-0.326788	5.88101	6.02744	8.4231	1.91331	8.0464	3.15944	5.67795	5.01829	10.4279	5.41521
chrV:13009364-13009486	CELE1	NA	NA	1	NA	NA	NA	NA	NA	-0.910214	-0.70173	0.133364	-0.732807	-1.24349	-0.519778	-0.160673	-0.10519	16.9616	25.2612	45.6789	23.8354	8.20811	20.6806	32.9598	35.3269	52.1065	86.8308
chrV:13620477-13620585	CELE1	NA	NA	NA	NA	NA	NA	NA	NA	-0.258313	0.41381	NA	-0.256578	-0.283834	NA	NA	NA	0	20.8333	0	0	0	0	0	0	0	8.72297
chrV:13651904-13652018	CELE1	0.496355	NA	1	NA	NA	NA	NA	NA	-1.56387	-0.432611	0.712028	-0.83582	-0.728642	0.501404	0.934618	0.561687	36.5134	115.89	43.1795	79.5281	88.7843	35.1283	53.6123	36.6107	24.095	226.532
chrV:13960550-13960724	CELE1	NA	NA	NA	NA	NA	NA	NA	NA	-0.225257	0.003212	0.278883	0.00757082	-0.241307	0	0	0.49297	0	4.09866	3.73066	4.28324	0	0	0	7.16768	0	5.43316
chrV:14125961-14126097	CELE1	0.98709	NA	1	NA	NA	NA	NA	NA	-0.132197	0.333529	-0.155929	0.207241	0.334808	-0.0807994	-0.435607	-0.0290416	35.726	60.1972	33.7416	52.7708	59.5033	37.7202	24.3178	39.2306	53.4208	55.7522
chrV:14600687-14600788	CELE1	NA	NA	NA	NA	NA	NA	NA	NA	-0.00278823	0.00367478	-0.350021	-0.229671	-0.0741059	-0.332578	-0.675281	-0.691971	6.88281	7.03201	5.55985	0	4.56609	6.43126	0	0	18.2488	9.3216
chrV:14631098-14631412	CELE1	NA	NA	NA	NA	NA	NA	NA	NA	0.462848	0.213784	0.0697381	0.193909	0.24815	0.830216	-0.263301	-0.119448	11.0805	7.39793	7.47359	7.13873	7.76469	18.2331	4.40898	5.6874	9.06511	6.13723
chrV:14697765-14698082	CELE1	NA	NA	NA	NA	NA	NA	NA	NA	0	0	NA	0	0.261956	NA	NA	NA	0	0	0	0	1.4646	0	0	0	0	0
chrV:15392276-15392650	CELE1	NA	NA	NA	NA	NA	NA	NA	NA	0.196327	0.209786	0.614971	0.00689499	0.461519	-0.0573819	-0.0129661	0.80142	3.74425	3.82541	6.27782	1.99884	6.52234	1.7493	1.77682	8.24231	2.42545	2.53548
chrV:15514200-15514486	CELE1	NA	NA	NA	NA	NA	NA	NA	NA	0.210857	0.397464	1.19726	0	0.404869	0.719388	1.11434	0	2.44616	4.99836	10.4775	0	4.86838	4.93308	9.58032	0	0	0
chrV:15545873-15546215	CELE1	NA	NA	1	NA	NA	NA	NA	NA	0.265114	0.0244226	-0.289853	-0.358691	0.799558	-0.599399	1.0026	-0.128424	12.2421	8.71164	7.36356	4.37065	22.181	4.66429	28.0157	8.8801	13.5053	11.2725
chrV:15652080-15652177	CELE1	NA	NA	NA	NA	NA	NA	NA	NA	-0.690615	-0.412031	0.524106	-0.687923	-0.322045	0	0	0.510031	0	7.31903	12.4487	0	9.90347	0	0	11.8812	0	29.7516
chrV:15770768-15770911	CELE1	NA	NA	NA	NA	NA	NA	NA	NA	-0.640869	-0.636559	-0.441721	-0.639314	-0.456414	-0.447625	-0.432106	-0.442321	0	0	0	0	3.50554	0	0	0	6.31628	20.2476
chrV:16503407-16503561	CELE1	NA	NA	NA	NA	NA	NA	NA	NA	0	0.326125	NA	0	0	NA	NA	NA	0	4.62751	0	0	0	0	0	0	0	0
chrV:17640031-17640365	CELE1	NA	NA	NA	NA	NA	NA	NA	NA	-0.501111	-0.77788	-1.43959	-0.644289	-0.752807	-0.99483	-1.13485	-0.314049	10.3993	6.77859	3.6417	8.35439	7.30113	7.04375	6.05083	16.7151	30.6231	26.0159
chrV:17789274-17789351	CELE1	NA	NA	NA	NA	NA	NA	NA	NA	NA	NA	NA	NA	NA	NA	NA	NA	0	0	0	0	0	0	0	0	0	0
chrV:18879544-18879587	CELE1	NA	NA	NA	NA	NA	NA	NA	NA	-0.166523	-0.132013	0.0650838	-0.324102	-0.0179729	0.237978	-0.793625	0.055577	63.5215	66.5586	70.2911	48.0834	79.4212	83.4462	15.7822	69.2244	85.5694	109.483
chrV:18879987-18880195	CELE1	0.98709	NA	1	NA	NA	0.999728	NA	NA	0.745598	-0.0788644	0.732306	0.288133	-0.321662	-0.462003	-0.821043	0.25396	60.1466	24.5928	69.2255	37.8596	18.7618	24.7257	16.3438	46.5062	49.2872	36.3944
chrV:19361093-19361193	CELE1	NA	NA	NA	NA	NA	NA	NA	NA	0	0.252868	0.247162	0	0.182426	0.398033	0	0.458969	0	7.69091	5.6149	0	4.998	9.34517	0	11.5283	0	0
chrV:20839377-20839457	CELE1	NA	NA	NA	NA	NA	NA	NA	NA	-0.337248	-1.01121	0.167276	-0.753384	-0.235355	-0.346714	-0.0172872	0.196789	25.8383	0	14.0026	8.43273	30.196	0	8.22601	15.4857	11.7511	60.2531
chrV:20839808-20840069	CELE1	NA	NA	NA	NA	NA	NA	NA	NA	-0.00517934	0.214363	-0.414021	-0.00574335	0.475356	-0.111771	0.72936	-0.0591105	2.67957	5.4753	0	2.60707	9.33542	1.80126	10.3872	2.22206	3.47154	3.62902
chrV:20842710-20843053	CELE1	NA	NA	NA	NA	NA	NA	NA	NA	-0.277376	-0.989696	0.0815131	-0.76633	-0.103476	0.557179	0.356486	0.546868	10.1657	2.08507	6.84355	4.35794	12.5257	12.0452	9.7664	12.1083	8.05501	19.7154
chrX:15599-15666	CELE1	NA	NA	NA	NA	NA	NA	NA	NA	NA	NA	0	NA	NA	0	0.422173	0	0	0	0	0	0	0	9.79862	0	0	0
chrX:203549-203744	CELE1	NA	NA	NA	NA	NA	NA	NA	NA	-0.384122	-0.360761	-0.108008	-0.383618	-0.147673	-0.932369	-0.90077	-0.919633	3.54809	3.96317	8.68018	3.48496	7.72651	0	0	0	14.3532	14.7144
chrX:1252287-1252664	CELE1	NA	NA	NA	NA	NA	NA	NA	NA	0.512797	0.00144304	0.228828	-0.249456	0.204767	0.428997	-0.0032449	-0.0396659	7.37652	1.89753	3.22744	0	3.69636	4.71934	1.83708	1.65918	2.4062	2.59901
chrX:2158636-2158950	CELE1	NA	NA	NA	NA	NA	NA	NA	NA	NA	NA	NA	NA	NA	NA	NA	NA	0	0	0	0	0	0	0	0	0	0
chrX:2788802-2789101	CELE1	NA	NA	NA	NA	NA	NA	NA	NA	0.241214	0.259893	-0.292699	0	0.4746	-0.356739	-0.026191	-0.0918518	2.34016	2.58927	4.35244	0	4.78761	3.75973	6.85046	6.12174	9.51837	0
chrX:3411265-3411388	CELE1	NA	NA	NA	NA	NA	NA	NA	NA	0	0.21561	NA	0	0.289803	NA	NA	NA	0	6.26437	0	0	8.14191	0	0	0	0	0
chrX:7607425-7607541	CELE1	NA	NA	NA	NA	NA	NA	NA	NA	0	0	0.602096	0	0.271038	0.757463	0.367803	0	0	0	10.4271	0	4.31452	13.6739	5.93517	0	0	0
chrX:15794465-15794618	CELE1	NA	NA	NA	NA	NA	NA	NA	NA	0.22382	0	0.789102	0.234898	0	0	0	0	4.51575	0	12.7182	4.86731	0	0	0	0	0	0
chrX:78767-78914	CELE1	NA	NA	NA	NA	NA	NA	NA	NA	-0.0107272	-0.689407	0.31536	-0.426433	-0.74812	0	0	0.30761	14.1859	0	4.41126	4.61521	0	0	0	4.23765	0	19.4867
chrX:202793-203000	CELE1	NA	NA	NA	NA	NA	NA	NA	NA	-0.543856	0.390015	0.48328	-0.531299	-0.280169	-0.428563	-0.394049	-0.414527	6.71862	28.4455	9.00402	6.88758	11.3835	0	0	0	4.37281	23.464
chrX:7607573-7607833	CELE1	NA	NA	NA	NA	NA	NA	NA	NA	0.217017	0.233273	-0.0982979	0	0.152819	-0.0681248	0.200843	-0.666388	2.68983	2.97618	4.34563	0	1.78445	5.02673	7.87409	0	7.29377	0
chrX:7860118-7860498	CELE1	NA	NA	NA	NA	NA	NA	NA	NA	-0.74636	-1.01035	0.380764	-0.733616	-0.656788	-0.199776	-0.857063	-0.551891	1.84264	0	9.60607	1.96737	2.54735	3.71599	0	1.64612	7.49478	12.6437
chrX:13316513-13316711	CELE1	NA	NA	NA	NA	NA	NA	NA	NA	0.321033	0	0.301245	0	0	0	0	0.30586	3.52787	0	2.84977	0	0	0	0	2.92553	0	0
chrX:13788001-13788160	CELE1	NA	NA	NA	NA	NA	NA	NA	NA	0	0	NA	0	0.271038	NA	NA	NA	0	0	0	0	3.15499	0	0	0	0	0
chrX:14154780-14154865	CELE1	NA	NA	NA	NA	NA	NA	NA	NA	0.244486	0	NA	0	0.17909	NA	NA	NA	8.16334	0	0	0	5.4156	0	0	0	0	0
chrX:15640005-15640278	CELE1	NA	NA	NA	NA	NA	NA	NA	NA	NA	NA	NA	NA	NA	NA	NA	NA	0	0	0	0	0	0	0	0	0	0
chrI:121285-121431	CELE11	NA	NA	NA	NA	NA	NA	NA	NA	NA	NA	NA	NA	NA	NA	NA	NA	0	0	0	0	0	0	0	0	0	0
chrI:546377-546548	CELE11	NA	NA	NA	NA	NA	NA	NA	NA	0	0	-0.326841	0.673343	0.369562	-0.708867	-0.0151662	-0.335419	0	0	3.79573	12.3004	5.64268	0	7.91117	3.64635	10.822	0
chrI:760657-760830	CELE11	NA	NA	NA	NA	NA	NA	NA	NA	0.226701	0.231522	0.303117	0	0	0	0	0	4.03475	4.12221	3.7521	0	0	0	0	0	0	0
chrI:815091-815312	CELE11	NA	NA	NA	NA	NA	NA	NA	NA	0	0	0.926014	0	0.939578	0	0	0.317216	0	0	10.6044	0	15.0374	0	0	2.8251	0	0
chrI:820547-820702	CELE11	NA	NA	NA	NA	NA	NA	NA	NA	0.250345	0	0.999577	0.26189	0.842271	0.551043	0.64869	0.322431	4.5003	0	15.6407	4.80491	18.4139	7.23026	8.90276	4.02033	0	0
chrI:826817-827002	CELE11	NA	NA	NA	NA	NA	NA	NA	NA	0.919853	0.802072	-0.538366	0.47121	0.464295	-0.609213	-0.517824	-0.560358	18.801	15.425	3.51003	8.05985	7.93193	2.53726	3.58229	3.13	15.1248	0
chrI:827177-827378	CELE11	NA	NA	NA	NA	NA	NA	NA	NA	0.579303	0.24715	0.655558	0.0067118	0.0751821	0.189688	0.293137	-0.0533389	13.8036	7.39627	11.6544	3.71072	4.80465	5.58376	6.73625	3.10481	4.50269	4.70695
chrI:970481-970679	CELE11	NA	NA	NA	NA	NA	NA	NA	NA	0.24191	-0.756509	0.159339	-0.327737	-0.558399	-0.067245	-0.0237599	-0.355663	24.562	3.60435	9.41124	10.9657	7.2175	6.59285	6.69655	2.92553	9.35367	24.2073
chrI:970863-971038	CELE11	NA	NA	NA	NA	NA	NA	NA	NA	-0.56737	-0.156511	1.12881	-0.169939	0.00359736	0.650486	0.759512	-0.108065	3.9889	12.2261	34.171	12.0208	16.0995	21.3175	23.3538	6.87131	10.8163	22.1482
chrI:1101708-1101861	CELE11	NA	NA	NA	NA	NA	NA	NA	NA	0.444048	0.454745	0.22226	0	0.162647	-0.108802	-0.0113869	0.219017	9.0745	9.31513	7.92189	0	3.0243	3.06449	4.50919	7.85293	6.18076	0
chrI:1275013-1275197	CELE11	NA	NA	NA	NA	NA	NA	NA	NA	0	0.24855	0	0	0.178311	0.267805	0.337538	0	0	3.87711	0	0	2.51752	2.55098	3.60166	0	0	0
chrI:1289621-1289715	CELE11	NA	NA	NA	NA	NA	NA	NA	NA	0	0	NA	0	0.261956	NA	NA	NA	0	0	0	0	4.90254	0	0	0	0	0
chrI:1307404-1307591	CELE11	NA	NA	NA	NA	NA	NA	NA	NA	0.185831	0.00406237	0.643513	-0.228383	-0.0779363	0.602382	0.282865	-0.0666862	7.46858	3.81524	12.5222	0	2.47735	11.9991	7.23788	3.33602	5.06296	5.05746
chrI:1585653-1585880	CELE11	NA	NA	NA	NA	NA	NA	NA	NA	0.422608	0	0.208881	0	0.314886	-0.0368533	-0.00976654	-0.368275	6.12927	0	5.35075	0	4.08545	2.87714	3.04568	0	4.17472	0
chrI:2175144-2175254	CELE11	NA	NA	NA	NA	NA	NA	NA	NA	0.91437	0.642505	-0.0283693	0.445899	0.720044	0.602777	-0.00263102	-0.0504686	31.5044	19.3855	5.88167	12.3072	22.3868	21.9811	6.25599	5.24486	8.19409	0
chrI:2185232-2185400	CELE11	NA	NA	NA	NA	NA	NA	NA	NA	0.309107	0.177123	0.97345	-0.446331	0.261009	0.266525	0.355454	0	16.5381	12.7325	14.4375	0	14.9349	2.79249	4.10897	0	0	11.4392
chrI:2198103-2198186	CELE11	NA	NA	NA	NA	NA	NA	NA	NA	NA	NA	NA	NA	NA	NA	NA	NA	0	0	0	0	0	0	0	0	0	0
chrI:2702700-2702900	CELE11	NA	NA	NA	NA	NA	NA	NA	NA	NA	NA	NA	NA	NA	NA	NA	NA	0	0	0	0	0	0	0	0	0	0
chrI:2702906-2703087	CELE11	NA	NA	NA	NA	NA	NA	NA	NA	NA	NA	NA	NA	NA	NA	NA	NA	0	0	0	0	0	0	0	0	0	0
chrI:2745305-2745465	CELE11	NA	NA	NA	NA	NA	NA	NA	NA	-0.0054587	0.208267	0	0.00695901	0.40164	0.238292	0	0.511707	4.31941	9.64947	0	4.65569	14.464	2.93125	0	7.5115	0	5.90561
chrI:2745662-2745851	CELE11	NA	NA	NA	NA	NA	NA	NA	NA	0.455383	0.651836	0.758892	0.453548	0.835326	0	0.599124	0.297524	7.35512	11.3252	9.40566	7.19001	15.3243	0	7.01375	3.0641	0	0
chrI:2747234-2747423	CELE11	NA	NA	NA	NA	NA	NA	NA	NA	0.477113	0.282059	-0.053501	0.272158	0.514643	0.315806	-0.350819	-0.36839	7.35512	4.08833	2.98476	3.94509	7.76494	7.45155	0	0	4.78707	0
chrI:2779155-2779259	CELE11	NA	NA	NA	NA	NA	NA	NA	NA	NA	NA	0	NA	NA	0	0.428516	0	0	0	0	0	0	0	6.61348	0	0	0
chrI:2779303-2779480	CELE11	NA	NA	NA	NA	NA	NA	NA	NA	NA	NA	0.413557	NA	NA	0	0	0	0	0	3.66779	0	0	0	0	0	0	0
chrI:2779665-2779818	CELE11	NA	NA	NA	NA	NA	NA	NA	NA	NA	NA	0	NA	NA	0	0	0	0	0	0	0	0	0	0	0	0	0
chrI:2966081-2966184	CELE11	NA	NA	NA	NA	NA	NA	NA	NA	0	0.326125	NA	0	0	NA	NA	NA	0	6.89678	0	0	0	0	0	0	0	0
chrI:2977864-2978050	CELE11	NA	NA	NA	NA	NA	NA	NA	NA	NA	NA	0	NA	NA	0	0.309368	0	0	0	0	0	0	0	3.56314	0	0	0
chrI:3119533-3119746	CELE11	NA	NA	NA	NA	NA	NA	NA	NA	-0.229247	0.205175	-0.444306	-0.227867	-0.0668649	-0.450092	-0.434691	-0.444906	0	7.25965	0	0	2.35887	0	0	0	4.44784	4.59077
chrI:3278151-3278338	CELE11	NA	NA	NA	NA	NA	NA	NA	NA	-0.186238	-0.16082	0.0490211	-0.0036573	0.0124592	-0.495594	-0.0215308	-0.449203	11.1324	11.4457	19.9238	15.2406	15.4873	9.48888	18.1695	10.0081	24.6399	20.5663
chrI:3420743-3420926	CELE11	NA	NA	NA	NA	NA	NA	NA	NA	0.549663	0.40321	-0.345874	0	0	-0.692991	-0.0214823	-0.0656672	11.4464	7.79636	3.08209	0	0	0	7.24246	6.57256	10.1162	0
chrI:3422041-3422218	CELE11	NA	NA	NA	NA	NA	NA	NA	NA	-0.327484	-0.70197	1.35325	-0.300262	0.075841	1.32967	0.913145	1.49454	11.7951	4.36394	20.0795	12.6331	22.0293	20.0439	11.5457	23.653	0	27.2409
chrI:3496543-3496738	CELE11	NA	NA	NA	NA	NA	NA	NA	NA	NA	NA	0	NA	NA	0	0	0	0	0	0	0	0	0	0	0	0	0
chrI:3624208-3624351	CELE11	NA	NA	NA	NA	NA	NA	NA	NA	0	0	NA	0	0.261956	NA	NA	NA	0	0	0	0	3.23432	0	0	0	0	0
chrI:3624508-3624683	CELE11	NA	NA	NA	NA	NA	NA	NA	NA	NA	NA	0	NA	NA	0	0.324157	0	0	0	0	0	0	0	3.78583	0	0	0
chrI:3745029-3745249	CELE11	NA	NA	NA	NA	NA	NA	NA	NA	-0.24701	-0.244826	NA	-0.246222	-0.0612126	NA	NA	NA	0	0	0	0	2.28416	0	0	0	0	4.44536
chrI:3844594-3844763	CELE11	NA	NA	NA	NA	NA	NA	NA	NA	NA	NA	NA	NA	NA	NA	NA	NA	0	0	0	0	0	0	0	0	0	0
chrI:3900100-3900221	CELE11	NA	NA	NA	NA	NA	NA	NA	NA	0	0	0.391579	0	0.271038	0	0	0	0	0	4.6484	0	4.13769	0	0	0	0	0
chrI:3904069-3904271	CELE11	NA	NA	NA	NA	NA	NA	NA	NA	0	0	NA	0	0.271038	NA	NA	NA	0	0	0	0	2.48669	0	0	0	0	0
chrI:3978458-3978630	CELE11	NA	NA	NA	NA	NA	NA	NA	NA	-0.00281779	0.0148181	0	-0.230246	-0.0745371	0	0	0.395186	4.05807	4.49007	0	0	2.69215	0	0	3.3652	0	5.49597
chrI:4057500-4057620	CELE11	NA	NA	NA	NA	NA	NA	NA	NA	0	0.228678	0	0.233633	0	0.317427	0	0.297511	0	5.92781	0	6.19476	0	5.4214	0	4.8114	0	0
chrI:4164778-4164968	CELE11	0.98709	0.977996	1	0.973193	0.486171	0.999728	0.950896	0.766694	0.418975	-0.141815	0.534631	0.0554661	0.409195	0.0811918	0.120917	0.313875	614.422	406.772	673.286	469.846	609.339	485.695	502.624	576.89	609.644	607.959
chrI:4300488-4300576	CELE11	NA	NA	NA	NA	NA	NA	NA	NA	NA	NA	NA	NA	NA	NA	NA	NA	0	0	0	0	0	0	0	0	0	0
chrI:4328658-4328808	CELE11	NA	NA	NA	NA	NA	NA	NA	NA	0.499206	0.524328	-0.0793481	0.271411	0.535178	-0.177091	-0.0186292	-0.38222	9.25479	9.89435	8.07928	4.52352	9.77045	6.25074	9.0114	3.85549	12.327	0
chrI:4569294-4569428	CELE11	NA	NA	NA	NA	NA	NA	NA	NA	-0.328891	-0.324434	NA	-0.327286	-0.344888	NA	NA	NA	0	0	0	0	0	0	0	0	0	7.27722
chrI:4569479-4569565	CELE11	NA	NA	NA	NA	NA	NA	NA	NA	NA	NA	NA	NA	NA	NA	NA	NA	0	0	0	0	0	0	0	0	0	0
chrI:4571451-4571563	CELE11	NA	NA	NA	NA	NA	NA	NA	NA	0	0	0.391579	0	0.271038	0	0	0	0	0	5.01863	0	4.46724	0	0	0	0	0
chrI:5039982-5040131	CELE11	NA	NA	NA	NA	NA	NA	NA	NA	-0.629902	-1.05015	0.454673	-0.896004	-0.90031	0.00797799	-0.925585	-0.339589	27.9053	14.3453	25.5429	19.1016	19.4108	13.8119	0	7.7624	18.4728	77.9616
chrI:5072695-5072848	CELE11	NA	NA	NA	NA	NA	NA	NA	NA	0.619649	0.252826	-0.0507337	0.254804	0.32055	-0.0320444	0.490528	-0.371453	13.5902	4.65756	3.6825	4.86731	6.04859	4.25967	13.345	0	5.90613	0
chrI:5337660-5337881	CELE11	NA	NA	NA	NA	NA	NA	NA	NA	0	0	0	0	0.392283	0	0.422173	0	0	0	0	0	4.3718	0	3.00138	0	0	0
chrI:5355190-5355380	CELE11	NA	NA	NA	NA	NA	NA	NA	NA	-0.654786	-0.443845	-0.727689	-0.439538	-0.339001	-0.520024	-0.432251	-0.28418	3.64097	7.51063	3.41815	7.84886	9.75375	5.90534	6.97703	9.14418	19.2695	25.3868
chrI:5587419-5587558	CELE11	NA	NA	NA	NA	NA	NA	NA	NA	-0.212822	-0.447158	0	-0.450456	-0.119752	0.490611	0.308031	0	4.96733	0	0	0	6.93243	8.05657	4.75933	0	0	14.0346
chrI:5731453-5731567	CELE11	NA	NA	NA	NA	NA	NA	NA	NA	NA	NA	0.391579	NA	NA	0	0	0	0	0	4.93135	0	0	0	0	0	0	0
chrI:5880200-5880413	CELE11	NA	NA	NA	NA	NA	NA	NA	NA	NA	NA	0.391579	NA	NA	0	0	0	0	0	2.65002	0	0	0	0	0	0	0
chrI:5930097-5930194	CELE11	NA	NA	NA	NA	NA	NA	NA	NA	NA	NA	NA	NA	NA	NA	NA	NA	0	0	0	0	0	0	0	0	0	0
chrI:5953440-5953622	CELE11	NA	NA	NA	NA	NA	NA	NA	NA	0.386293	0.00537723	-0.0531224	0.00744125	-0.300234	-0.372826	0.263592	0.207683	11.4728	3.91948	3.09893	4.09599	0	0	7.58924	6.60848	4.97019	5.19565
chrI:6122458-6122626	CELE11	NA	NA	NA	NA	NA	NA	NA	NA	-0.200571	-0.40205	-0.0448314	-0.404646	0.38035	-0.435123	0.509587	0.637723	8.30825	4.24417	3.86311	4.4353	22.7403	0	11.9942	14.3119	5.63217	17.2524
chrI:6170028-6170164	CELE11	NA	NA	NA	NA	NA	NA	NA	NA	-0.328891	-0.324434	NA	-0.327286	-0.344888	NA	NA	NA	0	0	0	0	0	0	0	0	0	7.17099
chrI:6413347-6413525	CELE11	NA	NA	NA	NA	NA	NA	NA	NA	0.436091	-0.188809	-0.090291	0.321856	0.062185	0.179351	0.197719	0.144471	23.4213	8.01413	6.33637	20.1944	13.6641	10.5459	11.4812	10.5113	10.3988	16.2886
chrI:6424308-6424471	CELE11	NA	NA	NA	NA	NA	NA	NA	NA	0.188564	-0.521652	0.285356	-0.00244371	-0.158042	0.420038	0.2956	0.277737	12.8019	0	3.98089	8.73547	5.91793	5.75526	4.06284	3.82422	0	11.788
chrI:7046764-7046866	CELE11	NA	NA	NA	NA	NA	NA	NA	NA	-0.219418	0.178157	-0.288011	-0.218451	-0.233111	-0.573969	-0.24433	-0.28393	0	13.9275	5.50587	0	0	0	6.74189	5.65223	17.661	9.53811
chrI:7073789-7073980	CELE11	NA	NA	NA	NA	NA	NA	NA	NA	0.239066	0.249729	-0.302482	0.460749	0.475246	-0.0739536	-0.296482	-0.302886	3.62201	3.73575	0	7.80798	7.68406	2.45798	0	0	4.73721	0
chrI:7127179-7127274	CELE11	NA	NA	NA	NA	NA	NA	NA	NA	0.708161	0.292557	0.552554	0.518902	1.3974	0.242789	0.854755	1.14	21.87	7.47151	11.8147	14.9231	55.4004	4.91595	21.1149	31.7279	0	0
chrI:7214285-7214511	CELE11	NA	NA	NA	NA	NA	NA	NA	NA	0.200147	0	0.301245	0	0.275566	0	0	0.30586	3.06355	0	2.49826	0	4.10345	0	0	2.56467	0	0
chrI:7287011-7287126	CELE11	NA	NA	NA	NA	NA	NA	NA	NA	NA	NA	-0.0228763	NA	NA	-0.339349	-0.331993	-0.33647	0	0	5.62815	0	0	0	0	0	8.20549	0
chrI:7380751-7380860	CELE11	NA	NA	NA	NA	NA	NA	NA	NA	-0.00568729	0.017284	-0.429636	-0.464165	0.0214692	-0.206357	-0.395819	-0.268426	12.7645	13.5822	11.8703	0	13.4122	17.1611	12.3702	15.8776	33.0743	17.2873
chrI:7613686-7613860	CELE11	NA	NA	NA	NA	NA	NA	NA	NA	0.42198	0.601802	0.34849	0.240565	0.456035	1.00061	0.67758	0.619856	7.98556	12.296	3.73066	4.28324	8.65369	12.8905	7.77555	6.91058	0	0
chrI:7758717-7758848	CELE11	NA	NA	NA	NA	NA	NA	NA	NA	0	0	0	0.318963	0	0	0	0.395186	0	0	0	5.17463	0	0	0	4.41045	0	0
chrI:7901079-7901275	CELE11	NA	NA	NA	NA	NA	NA	NA	NA	0	0	0	0.443001	0	0	0	0	0	0	0	7.27217	0	0	0	0	0	0
chrI:7902722-7902874	CELE11	NA	NA	1	NA	NA	NA	NA	NA	-0.73183	0.0218586	-0.332848	-0.914764	0.2977	-0.952638	0.14032	-0.840938	13.6791	38.282	40.4289	9.36351	50.4919	20.9131	62.2552	24.0068	72.4425	50.3352
chrI:8238401-8238612	CELE11	NA	NA	NA	NA	NA	NA	NA	NA	-0.0108173	-0.459706	0.251015	0.161435	-0.147315	0.422824	-0.0174401	-0.0891946	6.59185	0	14.1842	9.66582	4.39379	17.319	9.82663	8.87507	13.2699	9.119
chrI:8262628-8262813	CELE11	NA	NA	NA	NA	NA	NA	NA	NA	0	0	0	0	0.271038	0.301054	0	0	0	0	0	0	2.71397	3.52682	0	0	0	0
chrI:8276072-8276283	CELE11	NA	NA	NA	NA	NA	NA	NA	NA	-0.72877	0.182376	0.450088	-0.00992071	-0.801819	-0.130426	0.51504	0.627652	0	13.814	8.83414	9.97957	0	2.22609	9.82663	11.409	4.4898	13.7531
chrI:8456582-8456744	CELE11	NA	NA	NA	NA	NA	NA	NA	NA	0	0	-0.0141824	0	0.261956	-0.0709026	-0.290001	-0.29491	0	0	4.00531	0	2.85731	2.89528	0	0	5.58002	0
chrI:8459532-8459743	CELE11	NA	NA	NA	NA	NA	NA	NA	NA	-0.641706	-0.176676	0.183672	-0.639319	-0.468206	-0.696382	-0.660363	-0.344523	0	6.76665	9.23867	0	2.38112	0	0	2.74613	8.7801	13.7531
chrI:8536900-8537108	CELE11	NA	NA	NA	NA	NA	NA	NA	NA	0	0.237212	0.248768	0.421537	0.150941	0.270988	0	0.265637	0	3.71666	2.71342	7.17288	2.22843	3.1387	0	3.00082	0	0
chrI:8675952-8676141	CELE11	NA	NA	NA	NA	NA	NA	NA	NA	0	0	0.505903	0	0.271038	0.276244	0	0	0	0	6.87227	0	2.65683	3.45257	0	0	0	0
chrI:8776293-8776464	CELE11	NA	NA	NA	NA	NA	NA	NA	NA	NA	NA	NA	NA	NA	NA	NA	NA	0	0	0	0	0	0	0	0	0	0
chrI:8780688-8780868	CELE11	NA	NA	NA	NA	NA	NA	NA	NA	0.138713	-0.654535	-0.115089	0.152347	0.292371	0.37937	0.425682	-0.0787051	15.4417	0	9.39953	15.83	19.3068	21.3022	23.0193	10.3951	15.7763	16.2833
chrI:8785814-8785966	CELE11	NA	NA	NA	NA	NA	NA	NA	NA	-0.434459	-0.426544	0.321623	0.185166	0.135176	0	0.375661	0.611057	0	0	3.70657	14.6974	12.4315	0	4.53866	7.90426	0	12.4288
chrI:8895070-8895278	CELE11	NA	NA	NA	NA	NA	NA	NA	NA	-0.485584	-0.480899	-0.0380105	-0.483894	-0.117693	0.21767	-0.0114096	0.593515	0	0	3.12376	0	4.64373	6.2774	3.32256	11.788	4.55424	9.2499
chrI:9191205-9191414	CELE11	NA	NA	1	NA	NA	NA	NA	NA	1.16834	0.813441	0.0885419	0.363263	1.14248	-0.232498	0.288074	0.435232	36.6162	24.7591	29.4553	13.644	35.1271	21.4842	35.3033	40.526	35.4549	9.35643
chrI:9206152-9206287	CELE11	NA	NA	NA	NA	NA	NA	NA	NA	0.355857	0.199618	0.814824	-0.242187	0.21344	-0.118386	-0.714529	-0.0896733	15.4863	10.548	31.081	0	10.8481	8.29353	0	8.56147	13.6866	7.22371
chrI:9443663-9443766	CELE11	NA	NA	NA	NA	NA	NA	NA	NA	0.188554	0.371613	-0.0563241	-0.244665	0.0621108	-0.0953023	-0.331077	-0.03911	13.4372	20.6903	5.45293	0	8.95657	4.5378	0	6.0305	9.15228	9.4464
chrI:9523451-9523649	CELE11	NA	NA	NA	NA	NA	NA	NA	NA	-0.0044169	0.194811	0	-0.228448	-0.0683535	0	0	0	3.4946	7.20869	0	0	2.53668	0	0	0	0	4.77791
chrI:9540516-9540734	CELE11	NA	NA	NA	NA	NA	NA	NA	NA	-0.22127	0.185835	-0.0706709	-0.209226	-0.31929	-0.420716	-0.700636	0.363172	3.20569	10.0973	5.57064	3.42268	2.12667	2.15494	0	11.2497	8.49946	8.97192
chrI:9561973-9562172	CELE11	NA	NA	NA	NA	NA	NA	NA	NA	0	0.222272	-0.444306	0.226755	0.162203	-0.450092	-0.434691	-0.444906	0	3.58632	0	3.74783	2.52399	0	0	0	4.75918	0
chrI:9597922-9597996	CELE11	NA	NA	NA	NA	NA	NA	NA	NA	0	0	-0.296632	0	0.271038	0.112543	-0.291019	-0.297012	0	0	0	0	6.73065	12.5848	0	0	12.1273	0
chrI:9760191-9760394	CELE11	NA	NA	NA	NA	NA	NA	NA	NA	-0.0142524	0.149691	-0.972213	-0.390502	0.0146407	-0.983178	-0.649592	-0.241264	6.8179	10.548	0	0	7.42351	0	3.26621	9.22311	18.6635	9.63162
chrI:9910071-9910215	CELE11	NA	NA	NA	NA	NA	NA	NA	NA	-0.251357	-0.247861	NA	0.200046	-0.269698	NA	NA	NA	0	0	0	9.88012	0	0	0	0	0	6.77535
chrI:9911969-9912157	CELE11	NA	NA	NA	NA	NA	NA	NA	NA	NA	NA	NA	NA	NA	NA	NA	NA	0	0	0	0	0	0	0	0	0	0
chrI:9916119-9916295	CELE11	NA	NA	NA	NA	NA	NA	NA	NA	NA	NA	NA	NA	NA	NA	NA	NA	0	0	0	0	0	0	0	0	0	0
chrI:9917910-9918053	CELE11	NA	NA	NA	NA	NA	NA	NA	NA	NA	NA	NA	NA	NA	NA	NA	NA	0	0	0	0	0	0	0	0	0	0
chrI:9919126-9919297	CELE11	NA	NA	NA	NA	NA	NA	NA	NA	NA	NA	NA	NA	NA	NA	NA	NA	0	0	0	0	0	0	0	0	0	0
chrI:9997171-9997382	CELE11	NA	NA	NA	NA	NA	NA	NA	NA	0.801808	0	-0.328341	0.25303	0	-0.0863742	-0.00853594	-0.328828	13.2149	0	0	3.22194	0	2.22609	3.27554	0	4.4898	0
chrI:10052584-10052739	CELE11	NA	NA	NA	NA	NA	NA	NA	NA	-0.582738	-0.549323	0.641196	-0.989957	-0.502117	0.273577	-0.0193639	-0.0904913	13.3736	14.1751	23.461	4.37853	15.4283	14.4605	8.90276	7.75225	12.203	43.2724
chrI:10064682-10064794	CELE11	NA	NA	NA	NA	NA	NA	NA	NA	NA	NA	0.281257	NA	NA	0.222572	0.532372	0	0	0	5.77757	0	0	4.17638	12.2905	0	0	0
chrI:10067180-10067283	CELE11	NA	NA	NA	NA	NA	NA	NA	NA	0	0.24855	0	0	0.178311	0	0	0	0	6.89678	0	0	4.47829	0	0	0	0	0
chrI:10110392-10110577	CELE11	NA	NA	NA	NA	NA	NA	NA	NA	0.223903	0.232473	0	0.431723	0.159594	0	0.422173	0	3.73885	3.85626	0	8.05985	2.71397	0	3.58229	0	0	0
chrI:10246143-10246349	CELE11	NA	NA	NA	NA	NA	NA	NA	NA	0.447289	0.251684	-0.825047	0	0.179007	-0.829275	-0.819473	-0.825415	6.75108	3.46505	0	0	2.43864	0	0	0	13.5904	0
chrI:10247853-10248058	CELE11	NA	NA	NA	NA	NA	NA	NA	NA	0	0	0	0	0.271038	0	0.422173	0	0	0	0	0	2.45048	0	3.2345	0	0	0
chrI:10355756-10355909	CELE11	NA	NA	NA	NA	NA	NA	NA	NA	-0.250373	-0.24818	0.312167	-0.249581	-0.0719264	0	0.319421	0	0	0	4.23939	0	3.0243	0	4.32667	0	0	6.37938
chrI:10411417-10411567	CELE11	NA	NA	NA	NA	NA	NA	NA	NA	-0.212252	-0.425737	-0.361994	-0.714204	0.316322	-0.393439	-0.582953	0.798197	9.25479	4.7501	7.51132	0	22.6253	7.46967	4.41263	35.8913	18.6306	19.309
chrI:10413048-10413247	CELE11	NA	NA	NA	NA	NA	NA	NA	NA	-0.0146842	-0.382713	0.349352	-0.657762	-0.185687	-0.777172	-0.718678	0.154245	10.4976	3.88391	11.7709	0	6.98612	0	0	8.95766	9.3069	14.5783
chrI:10459267-10459383	CELE11	NA	NA	NA	NA	NA	NA	NA	NA	0	0	-0.444306	0	0.445067	-0.450092	-0.434691	-0.444906	0	0	0	0	11.9421	0	0	0	8.13536	0
chrI:10502165-10502346	CELE11	NA	NA	NA	NA	NA	NA	NA	NA	-0.0133804	-0.454047	0.17075	-0.457549	-0.294687	-0.349946	-0.00961083	-0.051551	7.67842	0	6.23192	0	2.55902	0	3.81547	3.19879	5.22987	10.7959
chrI:10538379-10538586	CELE11	NA	NA	NA	NA	NA	NA	NA	NA	-0.0113807	-0.260859	-0.0636777	0.405522	0.502588	-0.0480345	-0.371062	0.605825	3.34339	0	2.72647	10.4913	11.9468	3.15379	0	11.6284	4.57614	4.7232
chrI:10542537-10542656	CELE11	NA	NA	NA	NA	NA	NA	NA	NA	-0.3978	-0.176585	0	-0.396335	-0.109954	0.335781	0.361355	0.601085	0	5.97721	0	0	7.76236	5.46657	5.55255	10.0779	0	15.8467
chrI:10586074-10586239	CELE11	NA	NA	NA	NA	NA	NA	NA	NA	0.48956	0.362976	-0.488744	0.750489	0.171929	-1.01955	-0.630112	-0.469973	16.9168	12.9626	10.2489	26.2914	8.41702	2.84296	8.02779	10.7924	28.415	5.72773
chrI:10669285-10669505	CELE11	NA	NA	NA	NA	NA	NA	NA	NA	NA	NA	NA	NA	NA	NA	NA	NA	0	0	0	0	0	0	0	0	0	0
chrI:10704684-10704840	CELE11	NA	NA	NA	NA	NA	NA	NA	NA	0	0.228678	0.309802	0.233633	0	0	0.32482	0	0	4.56857	4.15838	4.77431	0	0	4.42303	0	0	0
chrI:10813200-10813396	CELE11	NA	NA	NA	NA	NA	NA	NA	NA	NA	NA	NA	NA	NA	NA	NA	NA	0	0	0	0	0	0	0	0	0	0
chrI:10828952-10829133	CELE11	NA	NA	1	NA	NA	NA	NA	NA	0.545108	0.156069	-0.288003	0.135098	0.537122	0.195051	0.18782	-0.561487	38.3921	24.3001	22.7542	23.98	37.7577	36.7433	37.3825	16.9828	41.1418	26.816
chrI:11008829-11008946	CELE11	NA	NA	NA	NA	NA	NA	NA	NA	0	0	0.391579	0	0.271038	0	0	0	0	0	4.80597	0	4.27795	0	0	0	0	0
chrI:11014040-11014174	CELE11	NA	NA	NA	NA	NA	NA	NA	NA	0.507134	0	0	0.515646	0.381141	0.284372	0	0	10.3516	0	0	10.612	7.18919	3.49579	0	0	0	0
chrI:11027947-11028077	CELE11	NA	NA	NA	NA	NA	NA	NA	NA	NA	NA	NA	NA	NA	NA	NA	NA	0	0	0	0	0	0	0	0	0	0
chrI:11029329-11029505	CELE11	NA	NA	NA	NA	NA	NA	NA	NA	NA	NA	NA	NA	NA	NA	NA	NA	0	0	0	0	0	0	0	0	0	0
chrI:11030165-11030312	CELE11	NA	NA	NA	NA	NA	NA	NA	NA	NA	NA	NA	NA	NA	NA	NA	NA	0	0	0	0	0	0	0	0	0	0
chrI:11432367-11432550	CELE11	NA	NA	NA	NA	NA	NA	NA	NA	NA	NA	NA	NA	NA	NA	NA	NA	0	0	0	0	0	0	0	0	0	0
chrI:11455753-11455936	CELE11	NA	NA	NA	NA	NA	NA	NA	NA	NA	NA	NA	NA	NA	NA	NA	NA	0	0	0	0	0	0	0	0	0	0
chrI:11491715-11491884	CELE11	NA	NA	NA	NA	NA	NA	NA	NA	0	0.252868	-0.0146461	0	0.182426	-0.302131	-0.293442	-0.0219872	0	4.56931	3.84039	0	2.9694	0	0	3.68925	5.35026	0
chrI:11570230-11570413	CELE11	NA	NA	NA	NA	NA	NA	NA	NA	0.221144	0.23778	-0.105725	0.218391	0	-0.798183	0.13681	-0.786229	3.81547	4.22164	13.2606	3.71223	0	3.56516	18.5644	3.40854	20.6921	0
chrI:11570586-11570769	CELE11	NA	NA	NA	NA	NA	NA	NA	NA	-0.230425	-0.217951	0.998394	-0.216921	-0.137887	0.552499	1.09156	0.603564	3.77949	3.89818	12.7945	4.07373	5.27467	6.13	14.9432	6.81708	0	10.5067
chrI:11589574-11589735	CELE11	NA	NA	NA	NA	NA	NA	NA	NA	0.321033	0	0	0	0	0	0	0	4.33362	0	0	0	0	0	0	0	0	0
chrI:11781973-11782125	CELE11	NA	NA	NA	NA	NA	NA	NA	NA	0.19531	0.707938	-0.584718	0.398816	0.76265	-1.12532	-0.706204	-1.01742	9.17708	24.607	15.9473	14.6974	25.8841	6.16904	13.4323	8.19832	42.4424	6.42108
chrI:11848526-11848718	CELE11	NA	NA	NA	NA	NA	NA	NA	NA	0.331662	0.191521	0.194226	-0.214188	0.249306	-0.0544497	0.267069	-0.402373	14.4816	11.1492	5.87674	3.88376	12.2682	3.39891	7.05037	0	4.9318	10.0167
chrI:11988971-11989152	CELE11	NA	NA	NA	NA	NA	NA	NA	NA	0.439872	0	-0.994026	0	0	-0.623862	-0.966803	0.107228	7.67842	0	0	0	0	3.60433	0	13.2896	15.4572	0
chrI:12000464-12000656	CELE11	NA	NA	NA	NA	NA	NA	NA	NA	-0.424978	0.171478	-0.0751836	-0.196013	0.383746	-0.200843	-0.0258926	-0.317196	3.60324	15.174	9.70382	7.42289	20.3172	7.33572	10.3571	6.03295	14.3571	15.2709
chrI:12000818-12000987	CELE11	NA	NA	NA	NA	NA	NA	NA	NA	0.199996	0.225664	0	-0.261748	0.470782	0	0.428516	0	8.18148	8.78851	0	0	13.928	0	4.08479	0	0	5.77897
chrI:12000998-12001202	CELE11	NA	NA	NA	NA	NA	NA	NA	NA	-0.0093249	0.2366	-0.0365534	0.221581	-0.326712	0.741046	-0.018924	-0.393362	3.42462	7.28803	3.18471	6.98838	0	14.204	3.25028	0	4.64311	4.79232
chrI:12083732-12083959	CELE11	NA	NA	NA	NA	NA	NA	NA	NA	0	0.283111	0.220298	0.488454	0.364944	-0.11642	-0.0125366	-0.0515666	0	3.40694	5.35075	6.28341	4.25675	2.06987	3.04568	2.75075	4.17472	0
chrI:12318890-12319115	CELE11	NA	NA	NA	NA	NA	NA	NA	NA	0.321033	0	NA	0	0	NA	NA	NA	3.1064	0	0	0	0	0	0	0	0	0
chrI:12370980-12371198	CELE11	NA	NA	NA	NA	NA	NA	NA	NA	NA	NA	NA	NA	NA	NA	NA	NA	0	0	0	0	0	0	0	0	0	0
chrI:12602531-12602686	CELE11	NA	NA	NA	NA	NA	NA	NA	NA	0	0	NA	0.318963	0	NA	NA	NA	0	0	0	4.37853	0	0	0	0	0	0
chrI:12606748-12606912	CELE11	NA	NA	NA	NA	NA	NA	NA	NA	NA	NA	0	NA	NA	0.359866	0	0	0	0	0	0	0	2.86019	0	0	0	0
chrI:12607044-12607225	CELE11	NA	NA	NA	NA	NA	NA	NA	NA	NA	NA	0	NA	NA	0.359866	0	0	0	0	0	0	0	2.59303	0	0	0	0
chrI:12614186-12614355	CELE11	NA	NA	NA	NA	NA	NA	NA	NA	NA	NA	0	NA	NA	0	0	0	0	0	0	0	0	0	0	0	0	0
chrI:12644972-12645193	CELE11	NA	NA	NA	NA	NA	NA	NA	NA	-0.00790261	-0.231604	0.494458	-0.232969	-0.244775	0.232003	0.307308	0.27381	3.13255	0	5.10905	0	0	2.12582	3.00138	2.62243	0	4.42534
chrI:12684532-12684603	CELE11	NA	NA	NA	NA	NA	NA	NA	NA	NA	NA	NA	NA	NA	NA	NA	NA	0	0	0	0	0	0	0	0	0	0
chrI:12753789-12753921	CELE11	NA	NA	NA	NA	NA	NA	NA	NA	-0.00580316	-0.399458	-0.0818281	-0.40222	-0.25672	0.132482	-0.287816	0.14675	10.4575	0	8.52789	0	3.50182	13.4128	5.00982	13.4702	13.6774	14.2978
chrI:12934395-12934632	CELE11	NA	NA	NA	NA	NA	NA	NA	NA	NA	NA	NA	NA	NA	NA	NA	NA	0	0	0	0	0	0	0	0	0	0
chrI:13031988-13032181	CELE11	NA	NA	NA	NA	NA	NA	NA	NA	0.227868	0	-0.309681	0.226059	0	-0.31348	-0.0152848	-0.310025	3.58467	0	0	3.52088	0	0	3.43457	0	4.90638	0
chrI:13059913-13060105	CELE11	NA	NA	NA	NA	NA	NA	NA	NA	-0.80507	0.00322823	0.587967	-0.349558	-0.331292	0.60303	0.635178	0.311827	0	14.8656	6.32109	7.07825	7.64424	6.79781	7.05037	3.01648	0	20.0335
chrI:13327773-13327969	CELE11	NA	NA	NA	NA	NA	NA	NA	NA	-0.211794	-0.446646	0.823416	-0.45038	0.0159862	0.332632	0	0.321661	3.56369	0	9.07145	0	7.29077	3.32989	0	2.95523	0	9.97386
chrI:13377751-13377960	CELE11	NA	NA	NA	NA	NA	NA	NA	NA	NA	NA	0	NA	NA	0	0	0.395186	0	0	0	0	0	0	0	2.77228	0	0
chrI:13454485-13454579	CELE11	NA	NA	NA	NA	NA	NA	NA	NA	-0.229369	0.00277084	-0.0146461	-0.228597	-0.240408	-0.302131	-0.293442	-0.0219872	0	7.55016	6.87227	0	0	0	0	6.60181	9.57415	10.0085
chrI:13508381-13508600	CELE11	NA	NA	NA	NA	NA	NA	NA	NA	0.226701	0.231522	0.251738	0	0	0	0.290879	0	3.19112	3.26029	2.57775	0	0	0	3.15643	0	0	0
chrI:13511396-13511561	CELE11	NA	NA	NA	NA	NA	NA	NA	NA	0	0	0.29709	0	0.453611	0	0	0.315554	0	0	3.4163	0	9.12286	0	0	3.77814	0	0
chrI:13602730-13602941	CELE11	NA	NA	NA	NA	NA	NA	NA	NA	0.239725	0.791045	0.13041	0.240083	0.456335	-0.343666	-0.302714	0.130716	3.28031	13.814	8.4296	3.22194	6.59068	3.09429	3.14296	8.45062	8.97959	0
chrI:13843844-13843932	CELE11	NA	NA	NA	NA	NA	NA	NA	NA	0.244839	0.470216	-0.364783	0	0.179826	0.5411	-0.0112224	0.215175	7.81377	16.787	0	0	5.67189	25.3465	7.48659	14.0937	10.2196	0
chrI:13901768-13901972	CELE11	NA	NA	NA	NA	NA	NA	NA	NA	0	0.334987	0	0	0	0	0.428516	0	0	3.78918	0	0	0	0	3.38739	0	0	0
chrI:13918191-13918374	CELE11	NA	NA	NA	NA	NA	NA	NA	NA	0	0	0	0	0.396367	0	0	0.406893	0	0	0	0	5.48694	0	0	3.40854	0	0
chrI:14082131-14082283	CELE11	NA	NA	NA	NA	NA	NA	NA	NA	0	0.453411	-0.324852	0.238668	0.827065	-0.396248	-0.672475	-0.0669548	0	9.37601	4.2671	4.46439	19.5407	3.08452	0	7.90426	12.1659	0
chrI:14145384-14145570	CELE11	NA	NA	NA	NA	NA	NA	NA	NA	NA	NA	NA	NA	NA	NA	NA	NA	0	0	0	0	0	0	0	0	0	0
chrI:14145732-14145876	CELE11	NA	NA	NA	NA	NA	NA	NA	NA	NA	NA	NA	NA	NA	NA	NA	NA	0	0	0	0	0	0	0	0	0	0
chrI:14145881-14146072	CELE11	NA	NA	NA	NA	NA	NA	NA	NA	NA	NA	NA	NA	NA	NA	NA	NA	0	0	0	0	0	0	0	0	0	0
chrI:14191929-14192118	CELE11	NA	NA	NA	NA	NA	NA	NA	NA	-0.673034	-0.163806	0.222623	-0.669754	-0.171432	-0.108585	-0.384809	0.219386	0	8.17665	6.4209	0	7.55938	2.48385	0	6.36501	5.00967	15.3455
chrI:14217333-14217461	CELE11	NA	NA	NA	NA	NA	NA	NA	NA	0.832905	0	-0.0550865	0	0.519513	0.208467	-0.328082	-0.0511082	21.6149	0	4.39616	0	11.134	10.1704	0	4.51302	7.37858	0
chrI:14528367-14528560	CELE11	NA	NA	NA	NA	NA	NA	NA	NA	0	0	0	0	0.261956	0	0	0	0	0	0	0	2.40073	0	0	0	0	0
chrI:14677323-14677496	CELE11	NA	NA	NA	NA	NA	NA	NA	NA	0.247367	0.950876	-0.81929	0.247876	0.322397	-0.812776	-0.75795	-0.816236	3.9967	20.9531	3.25922	3.92558	5.35335	3.77005	3.99089	3.34586	21.3952	0
chrI:14717736-14717852	CELE11	NA	NA	NA	NA	NA	NA	NA	NA	-0.172035	-0.135808	0.60589	-0.334403	0.0739528	1.48789	1.50016	1.05035	23.8884	25.0306	10.4271	18.0826	33.5147	34.5278	34.8903	20.2881	0	41.1732
chrI:14730820-14730872	CELE11	NA	NA	NA	NA	NA	NA	NA	NA	-0.418174	-0.00278824	0	-0.186034	-0.443012	0.289154	0.913106	0.273041	0	27.0666	0	14.1428	0	12.3771	50.2873	10.9845	0	37.0726
chrI:15002347-15002502	CELE11	NA	NA	NA	NA	NA	NA	NA	NA	-0.495262	-0.207524	-0.547625	-0.230257	-0.131917	-0.0442326	-0.0311855	0.342511	0	4.97937	3.63529	4.37853	6.22141	12.1008	12.8136	22.3915	18.0334	12.3925
chrI:15004187-15004302	CELE11	NA	NA	NA	NA	NA	NA	NA	NA	0.238011	0.458676	0	0	0.322478	0.834385	0	0.994618	5.99505	12.8797	0	0	8.03003	16.9652	0	20.8509	0	0
chrI:266242-266361	CELE11	NA	NA	NA	NA	NA	NA	NA	NA	0.474207	0.00107046	1.21745	-0.00980677	0.0716989	0.29386	0.814015	0.560065	23.1809	5.97721	29.7846	5.69209	8.41331	5.46657	16.6577	10.4529	0	8.18688
chrI:734083-734246	CELE11	NA	NA	NA	NA	NA	NA	NA	NA	0	0	0	0	0.388135	0	0.422173	0	0	0	0	0	5.67978	0	4.06284	0	0	0
chrI:734279-734402	CELE11	NA	NA	NA	NA	NA	NA	NA	NA	NA	NA	NA	NA	NA	NA	NA	NA	0	0	0	0	0	0	0	0	0	0
chrI:813069-813288	CELE11	NA	NA	NA	NA	NA	NA	NA	NA	0	0	0	0	1.27809	0.960182	0.642469	0.823647	0	0	0	0	21.8802	10.2538	6.05733	8.34783	0	0
chrI:814864-815064	CELE11	NA	NA	NA	NA	NA	NA	NA	NA	0.232234	0	-0.0305092	0	0.459675	-0.0364799	-0.354487	0.205014	3.49277	0	3.24809	0	7.14568	3.26363	0	6.01667	4.73551	0
chrI:874883-875059	CELE11	NA	NA	NA	NA	NA	NA	NA	NA	0.107961	0.0182872	0.235939	-0.159108	0.0423485	-0.677593	-1.08067	-0.143233	23.6486	20.9342	30.7739	16.1878	21.4918	10.0786	3.92325	19.9891	31.7878	27.5735
chrI:875217-875419	CELE11	NA	NA	NA	NA	NA	NA	NA	NA	0.143133	-0.392985	0.573093	-0.657885	0.282114	0.0467262	-0.591227	-1.02161	13.8334	3.53332	20.8227	0	16.6373	11.1125	3.2823	0	13.8582	14.3628
chrI:954725-954886	CELE11	NA	NA	1	NA	NA	NA	NA	NA	0.689626	0	1.30783	0.506815	1.6382	1.36686	0.218689	0.491882	12.8783	0	44.6547	8.84332	45.053	48.0964	12.8595	18.524	11.7511	0
chrI:972190-972350	CELE11	NA	NA	NA	NA	NA	NA	NA	NA	-0.255556	0.0163062	-0.503436	-0.253156	0.488947	-0.54729	-0.729175	-0.788063	0	4.82473	7.57746	0	15.1918	7.00571	4.31314	3.61602	22.8601	5.90561
chrI:976034-976178	CELE11	NA	NA	NA	NA	NA	NA	NA	NA	-0.393215	-0.639259	0.305134	-0.642194	-0.668152	0.549451	0.637316	0	4.79604	0	3.91107	0	0	7.77876	9.38429	0	0	19.8899
chrI:980538-980763	CELE11	NA	NA	NA	NA	NA	NA	NA	NA	0	0	-0.0235459	0.318963	0	-0.317295	-0.307729	-0.313579	0	0	2.88879	3.02235	0	0	0	0	4.21167	0
chrI:998334-998524	CELE11	NA	NA	NA	NA	NA	NA	NA	NA	0.228769	0	0	0.225648	0	0	0	0.406893	3.67564	0	0	3.57618	0	0	0	3.28362	0	0
chrI:1071942-1072019	CELE11	NA	NA	NA	NA	NA	NA	NA	NA	-0.549933	-0.328079	-0.322122	-0.796676	-0.634099	-0.328784	-0.00808845	-0.0399531	8.91572	18.3914	0	0	6.47178	0	8.54239	7.46384	11.6608	49.1646
chrI:1112698-1112872	CELE11	NA	NA	NA	NA	NA	NA	NA	NA	NA	NA	NA	NA	NA	NA	NA	NA	0	0	0	0	0	0	0	0	0	0
chrI:1251029-1251255	CELE11	NA	NA	NA	NA	NA	NA	NA	NA	-0.0138411	0.361187	0.512945	-0.227321	0.273497	-0.0939862	0.230399	-0.0360847	6.1271	12.9012	9.99304	3.00904	10.9469	2.07899	5.87054	2.76287	4.0068	8.51643
chrI:1270544-1270736	CELE11	NA	NA	NA	NA	NA	NA	NA	NA	0.447983	0	0.574021	0.243271	0.835796	0.927959	0.895637	0.828941	7.20648	0	5.87674	3.53913	15.2885	10.7346	10.5027	9.51566	0	0
chrI:1302700-1302892	CELE11	NA	NA	NA	NA	NA	NA	NA	NA	0.201294	0.712342	0.119109	0.201355	0.458497	0.484236	-0.289246	0.137653	7.20648	19.1988	8.8151	7.07825	12.2682	16.0409	3.45237	9.28254	9.42533	4.92644
chrI:1307220-1307402	CELE11	NA	NA	NA	NA	NA	NA	NA	NA	0.391136	0.235175	0.819336	0.399896	0.703284	0.37676	0.279877	0.223419	11.4004	8.16419	16.4319	11.561	18.669	8.74236	7.43564	6.85434	5.2013	5.36844
chrI:1308280-1308448	CELE11	NA	NA	NA	NA	NA	NA	NA	NA	0.481221	0.66663	0.361308	0.189048	0.356581	0.206588	-1.13887	0.338686	20.6139	26.8737	25.5194	12.9123	16.9974	22.2004	0	24.6464	22.0282	11.6263
chrI:1308871-1309071	CELE11	NA	NA	NA	NA	NA	NA	NA	NA	-0.73526	-0.905798	0.472148	-0.927491	-0.940582	-0.0164924	-0.778885	0.458565	10.4454	7.43307	23.8514	7.12745	7.33999	13.571	3.4548	23.3952	18.5212	38.4722
chrI:1677664-1677844	CELE11	NA	NA	NA	NA	NA	NA	NA	NA	0	0	NA	0	0.261956	NA	NA	NA	0	0	0	0	2.57316	0	0	0	0	0
chrI:1808810-1809036	CELE11	NA	NA	NA	NA	NA	NA	NA	NA	1.05157	0.260769	-0.0528102	0.248008	0.467055	-0.33912	0.236489	-0.0355187	18.498	3.15976	2.49826	3.00904	6.15518	0	6.11819	2.76287	4.19311	0
chrI:1883563-1883728	CELE11	0.98709	0.731459	1	0.116144	0.301476	0.999728	0.931059	0.98205	0.362327	0.500934	0.1218	0.900021	0.592586	-0.0482728	0.224119	0.07722	341.009	378.012	269.338	505.577	404.358	236.364	290.744	260.643	326.71	348.998
chrI:2228049-2228146	CELE11	NA	NA	NA	NA	NA	NA	NA	NA	NA	NA	NA	NA	NA	NA	NA	NA	0	0	0	0	0	0	0	0	0	0
chrI:2244872-2245094	CELE11	NA	NA	NA	NA	NA	NA	NA	NA	NA	NA	0.274275	NA	NA	0	0	0.254229	0	0	2.92765	0	0	0	0	2.61067	0	0
chrI:2425358-2425556	CELE11	NA	NA	NA	NA	NA	NA	NA	NA	-0.190257	-0.182664	0.174318	-0.410382	-0.432013	-0.419137	-0.703196	-0.0727533	3.4946	3.60435	9.41124	0	0	2.37151	0	6.07714	9.35367	9.55581
chrI:2426096-2426219	CELE11	NA	NA	NA	NA	NA	NA	NA	NA	0	0.448462	-0.310526	0	0	-0.314381	-0.00787994	-0.310875	0	12.0488	0	0	0	0	5.60012	0	7.6761	0
chrI:2426253-2426442	CELE11	NA	NA	NA	NA	NA	NA	NA	NA	-0.00790585	0.219293	-0.825047	-0.257926	-0.286524	-0.829275	-0.819473	-0.825415	3.69498	7.86341	0	0	0	0	0	0	14.8064	5.17066
chrI:2427375-2427473	CELE11	NA	NA	NA	NA	NA	NA	NA	NA	-0.256857	0.216946	0.594902	-0.255166	-0.0846495	0.610331	0.867389	0	0	15.0914	12.3229	0	4.70446	13.2523	20.475	0	0	9.92349
chrI:2430196-2430287	CELE11	NA	NA	NA	NA	NA	NA	NA	NA	0	0.222272	0	0.226755	0.162203	0	0.428516	0	0	7.79636	0	8.14746	5.48694	0	7.54799	0	0	0
chrI:2430449-2430636	CELE11	NA	NA	NA	NA	NA	NA	NA	NA	-0.652311	-0.390683	-0.335052	-0.650227	-0.47067	-0.338255	-0.33081	-0.335333	0	3.81524	0	0	2.6851	0	0	0	4.838	15.5088
chrI:2430801-2430980	CELE11	NA	NA	NA	NA	NA	NA	NA	NA	NA	NA	0	NA	NA	0	0.422173	0	0	0	0	0	0	0	3.7017	0	0	0
chrI:2431169-2431387	CELE11	NA	NA	NA	NA	NA	NA	NA	NA	0.878967	0.536419	-0.348571	0.518488	0.525012	-0.336058	-0.0157274	-0.0583222	12.7925	6.82213	2.58952	6.54163	6.55836	2.99538	6.21334	5.7276	8.49946	0
chrI:2747964-2748147	CELE11	NA	NA	NA	NA	NA	NA	NA	NA	0	0.470915	0.287803	0.244193	0.170051	0.22572	0	0.51211	0	8.11982	3.54818	3.71223	2.5312	2.56484	0	6.81708	0	0
chrI:2748436-2748625	CELE11	NA	NA	NA	NA	NA	NA	NA	NA	0	0	0.770924	0	0.686315	0.308668	0	0.540765	0	0	9.85704	0	12.4619	3.45257	0	6.12821	0	0
chrI:2748744-2748924	CELE11	NA	NA	NA	NA	NA	NA	NA	NA	NA	NA	0	NA	NA	0.547552	0	0	0	0	0	0	0	5.21471	0	0	0	0
chrI:2846774-2846963	CELE11	NA	NA	NA	NA	NA	NA	NA	NA	-0.00301982	0.0149182	0	-0.224714	0.0893407	0	0.289684	0	3.69498	4.08833	0	0	5.31367	0	3.65482	0	0	5.00423
chrI:2888609-2888740	CELE11	NA	NA	NA	NA	NA	NA	NA	NA	0.210255	0.579894	0.166672	0.384915	0.396969	-0.409991	-0.721405	0.8402	5.31854	17.6541	14.1882	10.3493	10.585	4.96961	0	32.2366	14.1014	0
chrI:3401057-3401242	CELE11	NA	NA	NA	NA	NA	NA	NA	NA	0.631441	0	0.435665	0.260374	0.178001	-0.370511	-0.563741	-0.605184	11.2521	0	20.138	4.02993	2.71397	6.06409	3.58229	3.37189	15.1248	0
chrI:3419741-3419934	CELE11	NA	NA	NA	NA	NA	NA	NA	NA	0.215056	0	-0.633038	0.21222	0.161057	-0.363321	-0.620604	-0.318808	3.6188	0	0	3.52088	2.60205	2.43264	0	3.00093	9.59475	0
chrI:3420105-3420236	CELE11	NA	NA	NA	NA	NA	NA	NA	NA	-0.596666	-0.345952	0.5583	-0.363367	-0.529351	0.236603	0.617424	0.966276	5.26838	11.3185	9.2422	10.8532	7.05669	3.57524	10.5214	19.0052	0	29.5309
chrI:3495194-3495358	CELE11	NA	NA	NA	NA	NA	NA	NA	NA	NA	NA	0	NA	NA	0.410642	0	0	0	0	0	0	0	3.97569	0	0	0	0
chrI:3627445-3627623	CELE11	NA	NA	NA	NA	NA	NA	NA	NA	NA	NA	NA	NA	NA	NA	NA	NA	0	0	0	0	0	0	0	0	0	0
chrI:3636093-3636297	CELE11	NA	NA	NA	NA	NA	NA	NA	NA	-0.00959566	-0.495342	0	-0.498826	-0.530053	0	0	0.561111	6.81694	0	0	0	0	0	0	5.6798	0	9.43038
chrI:3637049-3637248	CELE11	NA	NA	NA	NA	NA	NA	NA	NA	0.21049	0	0.299091	0.209104	0.287191	0.236393	0.310653	0.291238	3.47713	0	3.26433	3.41526	4.65742	2.35966	3.33153	3.13586	0	0
chrI:3653260-3653430	CELE11	NA	NA	NA	NA	NA	NA	NA	NA	0	0	NA	0	0.271038	NA	NA	NA	0	0	0	0	2.95204	0	0	0	0	0
chrI:3653594-3653774	CELE11	NA	NA	NA	NA	NA	NA	NA	NA	0	0	NA	0	0.271038	NA	NA	NA	0	0	0	0	2.78894	0	0	0	0	0
chrI:3720375-3720584	CELE11	NA	NA	NA	NA	NA	NA	NA	NA	0.578246	0.440439	0.135119	0.417593	0.226758	-0.368028	0.637031	0.410275	13.2777	10.5301	12.4355	10.0746	7.02542	5.37105	22.6118	17.2764	12.9935	4.67821
chrI:3769544-3769689	CELE11	NA	NA	NA	NA	NA	NA	NA	NA	0.439872	0	0	0	0	0	0	0	9.57173	0	0	0	0	0	0	0	0	0
chrI:3779384-3779541	CELE11	NA	NA	NA	NA	NA	NA	NA	NA	0	0.256241	0.244265	0	0.175103	0.212528	0	0.248389	0	4.91634	3.58927	0	2.94773	2.98691	0	3.68468	0	0
chrI:3842182-3842359	CELE11	NA	NA	NA	NA	NA	NA	NA	NA	0.244794	0.460724	NA	0.456806	0.158175	NA	NA	NA	3.94408	8.05916	0	8.04841	2.61653	0	0	0	0	0
chrI:3955110-3955284	CELE11	NA	NA	NA	NA	NA	NA	NA	NA	-0.24814	0.0161249	-0.444306	0.1938	0.0848845	-0.450092	-0.434691	-0.444906	0	4.43876	0	7.8063	5.54594	0	0	0	5.43907	5.43316
chrI:4073236-4073445	CELE11	NA	NA	NA	NA	NA	NA	NA	NA	-0.0137695	-0.411479	-0.37262	-0.185185	-0.440628	0.395903	-0.018364	-0.373591	6.6231	0	0	3.56936	0	8.4948	3.17289	0	4.53256	9.35643
chrI:4145769-4145938	CELE11	NA	NA	NA	NA	NA	NA	NA	NA	0	0	0	0.318963	0	0	0.428516	0	0	0	0	4.01795	0	0	4.08479	0	0	0
chrI:4297351-4297562	CELE11	NA	NA	NA	NA	NA	NA	NA	NA	-0.230103	-0.00126466	0.150483	0.00308078	-0.246312	-0.423979	-0.311602	-0.355871	0	3.38332	8.4296	3.53569	0	2.22609	3.27554	2.95836	8.7801	4.63408
chrI:4310349-4310575	CELE11	NA	NA	NA	NA	NA	NA	NA	NA	NA	NA	0	NA	NA	0.215459	0.278812	0.251773	0	0	0	0	0	2.07899	2.93527	2.56467	0	0
chrI:4329896-4330012	CELE11	NA	NA	NA	NA	NA	NA	NA	NA	0.226701	0.231522	-0.441721	0	0	-0.447625	-0.432106	-0.442321	6.0004	6.13047	0	0	0	0	0	0	7.77388	0
chrI:4513915-4514102	CELE11	NA	NA	NA	NA	NA	NA	NA	NA	-0.189525	0.177445	0.130961	0.133632	-0.119921	-0.419887	0.203619	0.332973	3.73429	12.3955	9.50572	10.8998	5.3702	2.51027	10.7821	13.1048	10.1259	10.4513
chrI:4522170-4522387	CELE11	NA	NA	NA	NA	NA	NA	NA	NA	NA	NA	NA	NA	NA	NA	NA	NA	0	0	0	0	0	0	0	0	0	0
chrI:4567734-4567799	CELE11	NA	NA	NA	NA	NA	NA	NA	NA	NA	NA	NA	NA	NA	NA	NA	NA	0	0	0	0	0	0	0	0	0	0
chrI:4858686-4858839	CELE11	NA	NA	NA	NA	NA	NA	NA	NA	0	0	-0.298781	0	0.388135	-0.302451	-0.00696886	-0.034802	0	0	0	0	6.04859	0	4.32667	3.78039	5.90613	0
chrI:4987665-4987785	CELE11	NA	NA	NA	NA	NA	NA	NA	NA	NA	NA	NA	NA	NA	NA	NA	NA	0	0	0	0	0	0	0	0	0	0
chrI:5224550-5224664	CELE11	NA	NA	NA	NA	NA	NA	NA	NA	NA	NA	NA	NA	NA	NA	NA	NA	0	0	0	0	0	0	0	0	0	0
chrI:5237920-5238120	CELE11	NA	NA	NA	NA	NA	NA	NA	NA	0.397237	0	0.399174	0.21456	0.14961	0.361341	-0.0197923	0.208	6.91966	0	8.46425	3.39826	2.31712	7.95946	3.31496	6.01667	4.73551	0
chrI:5718722-5718852	CELE11	NA	NA	NA	NA	NA	NA	NA	NA	0	0	0	0	0.396367	0.287	0.300098	0.269683	0	0	0	0	7.70685	5.00755	5.08631	4.44412	0	0
chrI:5842411-5842614	CELE11	NA	NA	NA	NA	NA	NA	NA	NA	NA	NA	NA	NA	NA	NA	NA	NA	0	0	0	0	0	0	0	0	0	0
chrI:6048592-6048766	CELE11	NA	NA	NA	NA	NA	NA	NA	NA	0.163465	0.0232289	-0.802802	-0.461979	0.00556327	-0.555045	-0.791929	-0.49961	11.9216	8.87751	0	0	8.20732	2.69675	0	3.58384	16.3172	11.047
chrI:6127892-6128164	CELE11	NA	NA	NA	NA	NA	NA	NA	NA	-0.248722	0.219476	0	0.00743141	0.0935948	0	0	0.31229	0	5.4727	0	2.74566	3.69816	0	0	2.29733	0	3.4828
chrI:6323642-6323833	CELE11	NA	NA	NA	NA	NA	NA	NA	NA	NA	NA	0	NA	NA	0	0	0	0	0	0	0	0	0	0	0	0	0
chrI:6333149-6333272	CELE11	NA	NA	NA	NA	NA	NA	NA	NA	0.192223	-0.246752	0	-0.248948	-0.268198	0	0	0.406893	11.2699	0	0	0	0	0	0	5.05784	0	7.92278
chrI:6520525-6520593	CELE11	NA	NA	NA	NA	NA	NA	NA	NA	NA	NA	NA	NA	NA	NA	NA	NA	0	0	0	0	0	0	0	0	0	0
chrI:6624009-6624189	CELE11	NA	NA	NA	NA	NA	NA	NA	NA	NA	NA	0.281921	NA	NA	0	0.569716	0	0	0	3.13318	0	0	0	7.5178	0	0	0
chrI:6767575-6767692	CELE11	NA	NA	NA	NA	NA	NA	NA	NA	-0.637631	-0.172936	-0.0347919	-0.635253	-0.464161	0.222953	-0.358627	-0.374755	0	12.157	5.53276	0	4.27795	11.1185	0	0	8.06642	24.4409
chrI:6975454-6975674	CELE11	0.336047	0.501505	1	0.0301009	0.48845	0.999728	0.9799	0.93105	-1.04557	-0.71455	-0.419188	-1.28083	-0.486493	-0.30055	-0.081405	-0.264912	151.732	194.974	177.273	126.558	231.163	194.048	227.559	198.818	319.1	446.845
chrI:7032396-7032595	CELE11	NA	NA	NA	NA	NA	NA	NA	NA	-0.00792474	-0.22239	0.774267	-0.00969681	0.406373	0.308974	0.596288	0	3.51023	0	9.36418	3.41526	11.6435	3.27994	6.66306	0	0	4.91213
chrI:7033783-7033935	CELE11	NA	NA	NA	NA	NA	NA	NA	NA	0.196919	0	0.391579	0	0.286674	0	0	0	4.54527	0	3.70657	0	6.59867	0	0	0	0	0
chrI:7108862-7108961	CELE11	NA	NA	NA	NA	NA	NA	NA	NA	0.321033	0	NA	0	0	NA	NA	NA	7.02047	0	0	0	0	0	0	0	0	0
chrI:7215747-7215930	CELE11	NA	NA	NA	NA	NA	NA	NA	NA	0.225802	0.231937	0.391579	0	0	0	0	0	3.77949	3.89818	3.08209	0	0	0	0	0	0	0
chrI:7426159-7426292	CELE11	NA	NA	NA	NA	NA	NA	NA	NA	0	0.239636	0.466037	0	0.470242	0	0.288996	0	0	5.35272	8.46425	0	11.01	0	4.97244	0	0	0
chrI:7433680-7433778	CELE11	NA	NA	NA	NA	NA	NA	NA	NA	-0.260868	0.220564	0	0.00293268	-0.0820832	0	0.321711	0.306692	0	15.0914	0	7.57138	5.09897	0	6.73037	6.33507	0	9.92349
chrI:7477380-7477524	CELE11	NA	NA	1	NA	NA	NA	NA	NA	-0.394735	-0.342503	-0.101231	-0.241517	-0.409049	0.0214195	0.777959	0.528836	24.0715	25.9647	12.9161	29.6404	24.1002	15.5575	37.731	28.4155	19.4015	53.5485
chrI:7661665-7661725	CELE11	0.98709	NA	1	NA	NA	NA	NA	NA	-0.740377	-0.785834	0.361071	-1.04886	-1.39035	-0.161837	0.595643	1.13017	114.764	108.753	70.7013	80.5637	54.7263	39.9983	90.1492	149.06	60.3356	315.886
chrI:8006898-8007081	CELE11	NA	NA	NA	NA	NA	NA	NA	NA	-0.505589	0.0123618	0.192833	-0.234781	-0.543899	-0.376233	0.260743	-0.0348786	0	8.11982	6.16418	3.71223	0	0	7.39523	3.40854	4.94317	10.5067
chrI:8008634-8008775	CELE11	NA	NA	NA	NA	NA	NA	NA	NA	0.440346	0	0	0	0	0.521105	0.590588	0.294798	9.88798	0	0	0	0	7.9431	9.3846	4.09986	0	0
chrI:8148648-8148739	CELE11	NA	NA	NA	NA	NA	NA	NA	NA	0.321033	0	0.285727	0	0	0.510317	0	0.303661	7.63094	0	6.16418	0	0	12.26	0	6.81708	0	0
chrI:8348111-8348328	CELE11	NA	NA	NA	NA	NA	NA	NA	NA	-0.218886	0.361955	0	-0.218021	-0.311038	0.566021	0.367345	0.598053	3.19003	13.7069	0	3.13326	2.31559	5.17395	3.18539	5.54748	0	8.72297
chrI:8354507-8354710	CELE11	NA	NA	NA	NA	NA	NA	NA	NA	-0.228957	0.00932281	0	-0.228191	-0.239856	0	0	0	0	3.80776	0	0	0	0	0	0	0	4.81581
chrI:8456835-8457035	CELE11	NA	NA	NA	NA	NA	NA	NA	NA	0	0	NA	0.329288	0	NA	NA	NA	0	0	0	3.72919	0	0	0	0	0	0
chrI:8497668-8497907	CELE11	NA	NA	NA	NA	NA	NA	NA	NA	0.200743	0	-0.616898	0	0.413607	-0.353273	-0.603236	-0.0538486	2.89761	0	0	0	6.30998	1.96638	0	5.03896	7.57953	0
chrI:8502690-8502900	CELE11	NA	NA	NA	NA	NA	NA	NA	NA	0	0	0	0	0.261956	0	0	0.395186	0	0	0	0	2.20731	0	0	2.75915	0	0
chrI:8537315-8537485	CELE11	NA	NA	NA	NA	NA	NA	NA	NA	0	0	0	0.329288	0	0	0	0.395186	0	0	0	4.38343	0	0	0	3.40456	0	0
chrI:8617990-8618080	CELE11	NA	NA	NA	NA	NA	NA	NA	NA	NA	NA	-0.444306	NA	NA	-0.450092	-0.434691	-0.444906	0	0	0	0	0	0	0	0	10.4597	0
chrI:8634089-8634302	CELE11	NA	NA	NA	NA	NA	NA	NA	NA	0	0	NA	0.318963	0	NA	NA	NA	0	0	0	3.19183	0	0	0	0	0	0
chrI:8706484-8706685	CELE11	NA	NA	NA	NA	NA	NA	NA	NA	-0.00668032	-0.221074	-0.825047	-0.222799	-0.0704191	-0.829275	-0.819473	-0.825415	3.47548	0	0	0	2.30565	0	0	0	13.9268	4.86349
chrI:8706682-8706820	CELE11	NA	NA	NA	NA	NA	NA	NA	NA	0.17187	-0.217271	-0.361855	-0.219847	0.0656096	0.121211	-0.0176189	0.201531	10.1014	0	0	0	6.70132	6.79038	4.79357	8.70037	6.84775	7.06781
chrI:8984452-8984597	CELE11	NA	NA	NA	NA	NA	NA	NA	NA	-0.60924	-0.170346	0.333506	-0.186281	-0.302009	0	0	0.311267	0	9.82555	4.47168	9.35687	6.64754	0	0	3.98753	0	20.1868
chrI:8985435-8985624	CELE11	NA	NA	NA	NA	NA	NA	NA	NA	-0.749523	-1.01285	0.274275	-1.01956	-0.486362	0	0	0.254229	3.66014	0	3.43614	0	7.76494	0	0	3.0641	0	25.5204
chrI:9270422-9270497	CELE11	NA	NA	NA	NA	NA	NA	NA	NA	0	0	-0.711359	0.447104	0.460702	-0.354754	-0.0231665	0.149559	0	0	0	19.7254	18.8984	8.63143	17.5344	23.5728	24.4919	0
chrI:9333458-9333561	CELE11	NA	NA	NA	NA	NA	NA	NA	NA	-0.85407	-0.342602	0.88762	-0.36984	-0.907774	0	0	0.741962	0	14.3658	21.8117	13.1356	0	0	0	17.2263	0	37.4815
chrI:9467043-9467259	CELE11	NA	NA	NA	NA	NA	NA	NA	NA	0	0	0.391579	0	0.392283	0	0	0	0	0	2.61339	0	4.47254	0	0	0	0	0
chrI:9560580-9560735	CELE11	NA	NA	NA	NA	NA	NA	NA	NA	NA	NA	0	NA	NA	0	0	0.395186	0	0	0	0	0	0	0	3.73192	0	0
chrI:9564798-9564982	CELE11	NA	NA	NA	NA	NA	NA	NA	NA	NA	NA	0	NA	NA	0.410642	0	0	0	0	0	0	0	3.54589	0	0	0	0
chrI:9683952-9684175	CELE11	NA	NA	NA	NA	NA	NA	NA	NA	NA	NA	0	NA	NA	0.315651	0	0	0	0	0	0	0	2.92852	0	0	0	0
chrI:9840282-9840451	CELE11	NA	NA	NA	NA	NA	NA	NA	NA	-0.328891	-0.324434	0	-0.327286	-0.344888	0	0.276757	0.463787	0	0	0	0	0	0	4.08479	7.37849	0	5.77897
chrI:9846859-9847041	CELE11	NA	NA	NA	NA	NA	NA	NA	NA	0	0.234348	0.251748	0.227848	0.153372	0.218398	0	0	0	4.24471	3.09893	4.09599	2.54504	2.57886	0	0	0	0
chrI:9880464-9880646	CELE11	0.98709	0.981742	1	0.963087	0.7324	0.999728	0.908545	0.965138	-0.624481	0.136024	0.532331	-0.119369	-0.396482	0.0280964	0.326885	0.24528	91.7461	170.472	155.96	138.369	111.373	104.908	133.227	125.315	136.737	205.395
chrI:9909894-9910069	CELE11	NA	NA	NA	NA	NA	NA	NA	NA	-0.00409496	-0.226994	0	0.00754169	-0.0741977	0.516294	0	0.293448	3.95128	0	0	4.2589	2.64626	6.40864	0	3.30784	0	5.40229
chrI:9911197-9911360	CELE11	NA	NA	NA	NA	NA	NA	NA	NA	-0.231447	-0.229301	0	-0.00517491	-0.242543	0.274905	0	0.315785	0	0	0	4.16495	0	2.87763	0	3.54988	0	5.79758
chrI:9915457-9915561	CELE11	NA	NA	NA	NA	NA	NA	NA	NA	0	0.326125	NA	0	0	NA	NA	NA	0	6.83109	0	0	0	0	0	0	0	0
chrI:10001916-10001996	CELE11	NA	NA	NA	NA	NA	NA	NA	NA	0	0	0	0	0.271038	0	0.314723	0	0	0	0	0	6.23208	0	8.57303	0	0	0
chrI:10066921-10067107	CELE11	NA	NA	NA	NA	NA	NA	NA	NA	NA	NA	0	NA	NA	0	0.422173	0	0	0	0	0	0	0	3.56314	0	0	0
chrI:10150680-10150777	CELE11	NA	NA	NA	NA	NA	NA	NA	NA	0.21123	0.237018	-0.0939641	0.403255	-0.325046	-1.21461	-0.479494	-0.533273	14.1924	15.2454	24.8974	21.5885	0	0	13.5981	12.3403	37.9874	9.70208
chrI:10252036-10252193	CELE11	NA	NA	NA	NA	NA	NA	NA	NA	0	0	-0.0472959	0	0.392283	-0.311494	-0.0152179	-0.308123	0	0	3.58927	0	6.14266	0	4.21713	0	6.02428	0
chrI:10252391-10252511	CELE11	NA	NA	NA	NA	NA	NA	NA	NA	0.225802	0.231937	0	0	0	0.315651	0	0	5.74732	5.92781	0	0	0	5.4214	0	0	0	0
chrI:10254514-10254630	CELE11	NA	NA	NA	NA	NA	NA	NA	NA	-0.231751	-0.229077	-0.461485	-0.230785	0.0922795	-0.75751	-0.746629	-0.753278	0	0	5.58005	0	8.29521	0	0	0	24.4061	8.12652
chrI:10279604-10279724	CELE11	NA	NA	NA	NA	NA	NA	NA	NA	0	0.326125	0	0	0	0	0.327117	0.304338	0	5.92781	0	0	0	0	5.73897	5.18324	0	0
chrI:10363819-10363961	CELE11	NA	NA	NA	NA	NA	NA	NA	NA	NA	NA	NA	NA	NA	NA	NA	NA	0	0	0	0	0	0	0	0	0	0
chrI:10408482-10408690	CELE11	NA	NA	NA	NA	NA	NA	NA	NA	NA	NA	-0.441721	NA	NA	-0.447625	-0.432106	-0.442321	0	0	0	0	0	0	0	0	4.35188	0
chrI:10492393-10492539	CELE11	NA	NA	NA	NA	NA	NA	NA	NA	NA	NA	0.289519	NA	NA	0.229503	0.306436	0.268761	0	0	4.44126	0	0	3.21042	4.72391	3.96041	0	0
chrI:10493302-10493507	CELE11	NA	NA	NA	NA	NA	NA	NA	NA	0.246539	0.470811	-0.751988	0	0.169904	-0.46434	-1.05477	-1.07245	3.40799	7.25266	2.75294	0	2.26088	6.36882	0	0	18.277	0
chrI:10534686-10534840	CELE11	NA	NA	NA	NA	NA	NA	NA	NA	NA	NA	NA	NA	NA	NA	NA	NA	0	0	0	0	0	0	0	0	0	0
chrI:10535964-10536065	CELE11	NA	NA	NA	NA	NA	NA	NA	NA	0	0	-0.0382091	0.482158	0.521098	0.193677	-0.392335	0.469617	0	0	6.40065	14.0453	14.4641	11.058	0	18.0051	8.9171	0
chrI:10643290-10643496	CELE11	NA	NA	NA	NA	NA	NA	NA	NA	-0.328891	-0.324434	0	-0.327286	-0.344888	0	0	0	0	0	0	0	0	0	0	0	0	4.74601
chrI:10668023-10668231	CELE11	NA	NA	NA	NA	NA	NA	NA	NA	0.241139	0	0.261992	0	0.186466	0.473753	0	0	3.35908	0	3.12376	0	2.4153	6.2774	0	0	0	0
chrI:10705399-10705522	CELE11	NA	NA	NA	NA	NA	NA	NA	NA	-0.378293	-0.375009	0	-0.377106	0.0143109	0	0.428516	0	0	0	0	0	11.2679	0	5.60012	0	0	15.3355
chrI:10822955-10823152	CELE11	NA	NA	NA	NA	NA	NA	NA	NA	-0.226616	0.000437692	0	0.322829	-0.153176	0.307705	0.324345	0	3.51225	7.2451	0	14.1349	4.90172	3.31307	3.50715	0	0	9.92349
chrI:10823155-10823307	CELE11	NA	NA	NA	NA	NA	NA	NA	NA	-0.211861	0.180598	0	-0.715816	-0.551149	0	0	0.395186	9.13381	19.141	0	0	3.29934	0	0	3.8051	0	19.0566
chrI:11027625-11027809	CELE11	NA	NA	NA	NA	NA	NA	NA	NA	NA	NA	0	NA	NA	0.410642	0	0	0	0	0	0	0	3.54589	0	0	0	0
chrI:11255247-11255417	CELE11	NA	NA	NA	NA	NA	NA	NA	NA	NA	NA	-0.332822	NA	NA	-0.33596	-0.00786683	-0.3331	0	0	0	0	0	0	4.06091	0	5.5663	0
chrI:11485371-11485556	CELE11	NA	NA	1	NA	NA	NA	NA	NA	0.130292	-0.549091	-0.478275	-0.565834	0.311736	-0.904341	-0.533108	-0.623989	18.7654	3.85626	23.187	3.67232	23.5858	13.6759	21.6449	19.7476	49.8097	20.4474
chrI:11538366-11538546	CELE11	NA	NA	NA	NA	NA	NA	NA	NA	-0.223534	-0.219854	-0.306247	0.198158	-0.0712435	0.209899	-0.00743445	-0.306694	0	0	0	8.2825	2.57316	7.2485	3.68125	0	5.0251	5.25306
chrI:11591658-11591831	CELE11	NA	NA	NA	NA	NA	NA	NA	NA	0	0.454068	0.271522	0	0.72142	0.215269	0	0.264292	0	8.24442	3.7521	0	14.0568	2.71225	0	3.60444	0	0
chrI:11591833-11591998	CELE11	NA	NA	NA	NA	NA	NA	NA	NA	0	0.6427	0.331078	0	0	0.268688	0	0	0	13.3212	3.93293	0	0	2.84296	0	0	0	0
chrI:11592011-11592152	CELE11	NA	NA	NA	NA	NA	NA	NA	NA	-0.00723434	0.55626	0.284109	0.212724	0.217289	0.508485	0	0.547749	4.89736	20.2046	3.9937	10.0889	10.1147	7.9431	0	8.8334	0	6.6958
chrI:11782764-11782985	CELE11	NA	NA	NA	NA	NA	NA	NA	NA	0.498305	1.04874	1.51424	0.713296	1.02262	0.784278	-0.407377	1.28884	6.29492	16.4227	27.0905	9.82966	15.3893	12.2873	0	21.5874	4.09704	0
chrI:11848170-11848345	CELE11	NA	NA	NA	NA	NA	NA	NA	NA	-0.824147	-0.158628	0.184495	-0.568196	-0.341261	-0.421686	0.224156	-0.716988	0	12.2261	11.1284	3.88097	8.16069	2.68143	11.6769	0	10.576	22.1482
chrI:11944592-11944712	CELE11	NA	NA	NA	NA	NA	NA	NA	NA	-0.00481809	0.0158609	-0.0395337	-0.249367	0.0903083	-0.0471849	-0.0208952	-0.313971	5.74732	6.41969	10.7912	0	8.02099	10.8428	11.0133	4.8114	15.3833	7.85788
chrI:11979698-11979880	CELE11	NA	NA	NA	NA	NA	NA	NA	NA	NA	NA	-0.444306	NA	NA	-0.450092	-0.434691	-0.444906	0	0	0	0	0	0	0	0	5.2013	0
chrI:11980228-11980403	CELE11	NA	NA	NA	NA	NA	NA	NA	NA	0	0	-0.441721	0	0.271038	-0.447625	-0.432106	-0.442321	0	0	0	0	2.86817	0	0	0	5.16786	0
chrI:11998467-11998663	CELE11	NA	NA	NA	NA	NA	NA	NA	NA	0	0.474563	-0.782179	0.451745	0	-0.800123	-0.746865	-0.790978	0	7.88611	3.31404	7.27217	0	3.32989	3.52495	3.18361	18.8973	0
chrI:12316816-12317011	CELE11	NA	NA	NA	NA	NA	NA	NA	NA	NA	NA	NA	NA	NA	NA	NA	NA	0	0	0	0	0	0	0	0	0	0
chrI:12402896-12402963	CELE11	NA	NA	NA	NA	NA	NA	NA	NA	NA	NA	NA	NA	NA	NA	NA	NA	0	0	0	0	0	0	0	0	0	0
chrI:12591317-12591443	CELE11	NA	NA	NA	NA	NA	NA	NA	NA	0.203969	0.408863	0	0.201749	0.0786141	0	0	0.395186	11.0037	17.4119	0	10.7567	7.94958	0	0	4.58409	0	7.48664
chrI:12599593-12599743	CELE11	NA	NA	NA	NA	NA	NA	NA	NA	NA	NA	NA	NA	NA	NA	NA	NA	0	0	0	0	0	0	0	0	0	0
chrI:12613875-12613981	CELE11	NA	NA	NA	NA	NA	NA	NA	NA	0.321033	0	NA	0	0	NA	NA	NA	6.56119	0	0	0	0	0	0	0	0	0
chrI:12873461-12873674	CELE11	NA	NA	NA	NA	NA	NA	NA	NA	-0.00205078	-0.228075	0.311952	-0.229443	-0.241279	0.511037	0	0.290431	3.28059	0	3.05078	0	0	5.27065	0	2.72047	0	4.44301
chrI:13024669-13024867	CELE11	NA	NA	NA	NA	NA	NA	NA	NA	0	0.326125	0	0	0	0	0.428516	0	0	3.60435	0	0	0	0	3.48952	0	0	0
chrI:13025041-13025185	CELE11	NA	NA	NA	NA	NA	NA	NA	NA	NA	NA	NA	NA	NA	NA	NA	NA	0	0	0	0	0	0	0	0	0	0
chrI:13025292-13025453	CELE11	NA	NA	NA	NA	NA	NA	NA	NA	NA	NA	0.391579	NA	NA	0	0	0	0	0	3.50065	0	0	0	0	0	0	0
chrI:13032354-13032435	CELE11	NA	NA	NA	NA	NA	NA	NA	NA	0	0	NA	0.329288	0	NA	NA	NA	0	0	0	9.14105	0	0	0	0	0	0
chrI:13305851-13306047	CELE11	NA	NA	NA	NA	NA	NA	NA	NA	0	0.326125	0	0	0	0	0.504036	0	0	3.64094	0	0	0	0	7.0499	0	0	0
chrI:13377614-13377731	CELE11	NA	NA	NA	NA	NA	NA	NA	NA	NA	NA	0.391579	NA	NA	0	0	0	0	0	4.80597	0	0	0	0	0	0	0
chrI:13509127-13509247	CELE11	NA	NA	NA	NA	NA	NA	NA	NA	0	0.326125	-0.444306	0	0	-0.450092	-0.434691	-0.444906	0	5.92781	0	0	0	0	0	0	7.86642	0
chrI:13509252-13509424	CELE11	NA	NA	NA	NA	NA	NA	NA	NA	0.212487	0.218153	NA	0	0.288108	NA	NA	NA	4.05807	4.14604	0	0	5.3843	0	0	0	0	0
chrI:13510749-13510915	CELE11	NA	NA	NA	NA	NA	NA	NA	NA	NA	NA	0	NA	NA	0	0	0	0	0	0	0	0	0	0	0	0	0
chrI:13511068-13511246	CELE11	NA	NA	NA	NA	NA	NA	NA	NA	0	0	NA	0	0.271038	NA	NA	NA	0	0	0	0	2.8201	0	0	0	0	0
chrI:13519582-13519624	CELE11	NA	NA	NA	NA	NA	NA	NA	NA	-0.188281	-0.169827	0.289611	-0.407143	-0.100113	0	0	0.558139	16.3267	18.0647	13.1885	0	23.479	0	0	29.1708	0	44.2234
chrI:13680792-13681014	CELE11	NA	NA	NA	NA	NA	NA	NA	NA	NA	NA	NA	NA	NA	NA	NA	NA	0	0	0	0	0	0	0	0	0	0
chrI:13681634-13681830	CELE11	NA	NA	NA	NA	NA	NA	NA	NA	NA	NA	NA	NA	NA	NA	NA	NA	0	0	0	0	0	0	0	0	0	0
chrI:13706473-13706688	CELE11	NA	NA	NA	NA	NA	NA	NA	NA	NA	NA	NA	NA	NA	NA	NA	NA	0	0	0	0	0	0	0	0	0	0
chrI:13707495-13707673	CELE11	NA	NA	NA	NA	NA	NA	NA	NA	NA	NA	0	NA	NA	0.410642	0	0	0	0	0	0	0	3.66474	0	0	0	0
chrI:13707733-13707798	CELE11	NA	NA	NA	NA	NA	NA	NA	NA	NA	NA	NA	NA	NA	NA	NA	NA	0	0	0	0	0	0	0	0	0	0
chrI:13707871-13708005	CELE11	NA	NA	NA	NA	NA	NA	NA	NA	NA	NA	NA	NA	NA	NA	NA	NA	0	0	0	0	0	0	0	0	0	0
chrI:14018224-14018344	CELE11	NA	NA	NA	NA	NA	NA	NA	NA	NA	NA	0.391579	NA	NA	0	0	0	0	0	4.68682	0	0	0	0	0	0	0
chrI:14032547-14032662	CELE11	NA	NA	NA	NA	NA	NA	NA	NA	NA	NA	NA	NA	NA	NA	NA	NA	0	0	0	0	0	0	0	0	0	0
chrI:14127736-14127835	CELE11	NA	NA	NA	NA	NA	NA	NA	NA	-0.564188	-0.335005	-0.324031	-0.549518	0.140518	-0.666422	0.33983	-0.339224	6.95426	14.3453	12.1997	7.49566	34.9453	4.71931	34.1586	11.6436	28.5551	38.6646
chrI:14133029-14133204	CELE11	NA	NA	NA	NA	NA	NA	NA	NA	NA	NA	NA	NA	NA	NA	NA	NA	0	0	0	0	0	0	0	0	0	0
chrI:14150341-14150438	CELE11	NA	NA	NA	NA	NA	NA	NA	NA	NA	NA	NA	NA	NA	NA	NA	NA	0	0	0	0	0	0	0	0	0	0
chrI:14191322-14191414	CELE11	NA	NA	NA	NA	NA	NA	NA	NA	-0.204162	-0.195372	0.233792	-0.204956	-0.459846	0.40096	-0.411947	0.230143	7.4777	7.71252	13.118	7.34464	0	17.2027	0	13.0038	10.2348	21.1274
chrI:14203064-14203162	CELE11	NA	NA	NA	NA	NA	NA	NA	NA	NA	NA	NA	NA	NA	NA	NA	NA	0	0	0	0	0	0	0	0	0	0
chrI:14205143-14205335	CELE11	NA	NA	NA	NA	NA	NA	NA	NA	0	0	NA	0	0.261956	NA	NA	NA	0	0	0	0	2.41317	0	0	0	0	0
chrI:14427801-14427849	CELE11	NA	NA	NA	NA	NA	NA	NA	NA	0	0	-0.533385	0.4402	0.168923	-0.536949	-0.528575	-0.533711	0	0	0	29.2371	9.50493	0	0	0	38.8505	0
chrI:14595858-14595958	CELE11	NA	NA	NA	NA	NA	NA	NA	NA	0.447876	-0.195221	-0.641427	0.468234	-0.163418	-0.327448	-0.206839	-0.116589	34.427	7.69091	12.928	35.7901	9.60931	22.3351	26.3884	30.1572	47.1206	19.454
chrI:14665918-14666144	CELE11	NA	NA	NA	NA	NA	NA	NA	NA	-0.0205485	0.353367	-0.0831236	-0.207509	0.81559	0.249891	0.182185	0.54218	9.21982	16.3232	8.25038	6.31109	27.5327	12.474	11.9887	18.7455	12.0204	12.8443
chrI:14666654-14666839	CELE11	NA	NA	NA	NA	NA	NA	NA	NA	1.0591	0.585592	0.654022	0.407527	-0.363157	-0.14088	0.366117	-0.109623	30.0176	15.425	24.8527	11.3746	0	9.59091	18.3648	9.63189	14.8974	5.11185
chrI:14676556-14676737	CELE11	NA	NA	NA	NA	NA	NA	NA	NA	0.17287	0.186092	-0.0660164	0.00688612	0.319695	-0.111992	0.272509	0.437889	7.64204	7.88203	3.11596	4.1185	11.0945	2.59303	7.47649	9.84358	5.22987	5.22419
chrII:77966-78149	CELE11	NA	NA	NA	NA	NA	NA	NA	NA	0	0.540558	-0.566894	0	0.503184	-0.572339	-0.260347	-0.567381	0	11.6945	0	0	10.1248	0	3.62123	0	10.3461	0
chrII:543102-543252	CELE11	NA	NA	NA	NA	NA	NA	NA	NA	0.570192	-0.272829	-0.694447	0.223597	-0.10493	-0.706762	-0.0146424	-0.347504	18.5096	0	0	9.48753	3.34304	0	9.0114	3.85549	12.327	6.50613
chrII:598494-598571	CELE11	NA	NA	NA	NA	NA	NA	NA	NA	-0.00688036	-0.00129151	0	-0.228075	-0.24505	0	0	0.395186	9.0006	9.1957	0	0	0	0	0	7.46384	0	12.5952
chrII:601816-601907	CELE11	NA	NA	NA	NA	NA	NA	NA	NA	0.319981	0	0.279919	0	0	0.22148	0.517276	0	7.55898	0	7.09637	0	0	5.12969	14.4849	0	0	0
chrII:746206-746423	CELE11	NA	NA	NA	NA	NA	NA	NA	NA	-0.198989	-0.180274	-0.0143157	-0.420094	-0.44242	-0.333434	-0.326046	-0.33054	3.19003	3.56322	2.9948	0	0	0	0	0	4.17222	9.01307
chrII:757579-757753	CELE11	NA	NA	NA	NA	NA	NA	NA	NA	0.181016	-0.2249	-0.330349	0.198328	-0.350434	-0.032355	0.222492	-0.0354296	11.9594	4.09866	0	12.4696	2.88456	3.74851	7.61493	3.58384	5.43907	11.047
chrII:758364-758516	CELE11	NA	NA	NA	NA	NA	NA	NA	NA	-0.684969	-0.407803	0.255853	-0.407076	-0.166328	0	0.295654	0	0	4.68801	3.70657	4.89913	9.64274	0	4.53866	0	0	19.0566
chrII:871237-871407	CELE11	NA	NA	NA	NA	NA	NA	NA	NA	0.490834	0.51222	0	0	0	0	0.314723	0	8.17235	8.73712	0	0	0	0	4.06091	0	0	0
chrII:915230-915324	CELE11	NA	NA	NA	NA	NA	NA	NA	NA	0	0	0.413557	0	0.261956	0	0	0	0	0	6.87227	0	4.90254	0	0	0	0	0
chrII:915345-915506	CELE11	NA	NA	NA	NA	NA	NA	NA	NA	NA	NA	NA	NA	NA	NA	NA	NA	0	0	0	0	0	0	0	0	0	0
chrII:1253787-1253973	CELE11	NA	NA	NA	NA	NA	NA	NA	NA	-0.230475	-0.228351	0	0.00317861	-0.241417	0	0.610568	0	0	0	0	4.00838	0	0	7.27659	0	0	5.25361
chrII:1295406-1295582	CELE11	NA	NA	NA	NA	NA	NA	NA	NA	0	0.70792	-0.325959	0.278321	0.366135	-0.329053	-0.321826	-0.326235	0	12.8295	0	4.23484	5.48328	0	0	0	5.37761	0
chrII:1295591-1295766	CELE11	NA	NA	NA	NA	NA	NA	NA	NA	0.213665	0	0	0.2121	0.160991	0.575781	0	0	3.95128	0	0	3.88097	2.86817	6.40864	0	0	0	0
chrII:1295775-1295968	CELE11	NA	NA	NA	NA	NA	NA	NA	NA	0	0.432071	0	0.217543	0.160628	0.359866	0	0	0	8.00806	0	3.52088	2.60205	2.43264	0	0	0	0
chrII:1382347-1382510	CELE11	NA	NA	NA	NA	NA	NA	NA	NA	NA	NA	0	NA	NA	0	0	0	0	0	0	0	0	0	0	0	0	0
chrII:1383122-1383230	CELE11	NA	NA	NA	NA	NA	NA	NA	NA	NA	NA	NA	NA	NA	NA	NA	NA	0	0	0	0	0	0	0	0	0	0
chrII:1443557-1443765	CELE11	NA	NA	NA	NA	NA	NA	NA	NA	NA	NA	0	NA	NA	0.410642	0	0	0	0	0	0	0	3.1387	0	0	0	0
chrII:1502898-1503094	CELE11	NA	NA	NA	NA	NA	NA	NA	NA	-0.469488	-0.209217	1.22326	-0.221183	0.359076	0.832704	0.686323	1.06536	0	3.64094	14.8289	3.46727	14.5815	9.05537	6.90722	12.2777	0	9.97386
chrII:1519659-1519775	CELE11	NA	NA	NA	NA	NA	NA	NA	NA	NA	NA	NA	NA	NA	NA	NA	NA	0	0	0	0	0	0	0	0	0	0
chrII:1542137-1542306	CELE11	NA	NA	NA	NA	NA	NA	NA	NA	0.319981	0	0.293944	0	0	0	0.327456	0	4.09074	0	3.33591	0	0	0	3.91945	0	0	0
chrII:1903726-1903947	CELE11	NA	NA	NA	NA	NA	NA	NA	NA	-0.228864	0.377686	0.792923	0.194957	0.256838	0.306568	0.822586	0	3.13255	13.4599	8.82251	9.82966	10.6656	2.9549	9.25737	0	0	8.5658
chrII:2013659-2013850	CELE11	NA	NA	NA	NA	NA	NA	NA	NA	NA	NA	NA	NA	NA	NA	NA	NA	0	0	0	0	0	0	0	0	0	0
chrII:2062475-2062612	CELE11	NA	NA	NA	NA	NA	NA	NA	NA	-0.26307	0.0170449	0	0.566928	-0.0987011	0.208015	0.484132	0	0	5.62886	0	21.2446	3.37494	3.41979	9.65662	0	0	6.88988
chrII:2069335-2069460	CELE11	NA	NA	NA	NA	NA	NA	NA	NA	-0.521035	0.220692	-0.926168	-0.00255606	0.276668	0.357984	-0.526944	0.654268	0	18.0225	0	11.37	18.7918	26.8552	5.51123	38.035	21.6558	15.3431
chrII:2165799-2165888	CELE11	NA	NA	1	NA	NA	NA	NA	NA	0.385885	0.587633	0.898001	0.00151362	1.27418	-0.608254	0.522884	-0.127358	23.1809	33.201	96.7924	8.32851	78.9255	17.7761	67.8799	34.343	51.94	10.9158
chrII:2274321-2274374	CELE11	NA	NA	NA	NA	NA	NA	NA	NA	-0.24701	-0.244826	0.222212	-0.246222	-0.0612126	-0.0555631	-0.389062	0.633006	0	0	22.5921	0	9.34812	12.1479	0	44.7908	17.6266	18.1931
chrII:2311241-2311457	CELE11	NA	NA	NA	NA	NA	NA	NA	NA	0.440953	0.247469	0.31262	0	0	0.276337	0	0	6.43997	3.30537	2.61339	0	0	2.1748	0	0	0	0
chrII:2381200-2381344	CELE11	NA	NA	NA	NA	NA	NA	NA	NA	NA	NA	NA	NA	NA	NA	NA	NA	0	0	0	0	0	0	0	0	0	0
chrII:2675303-2675470	CELE11	NA	NA	NA	NA	NA	NA	NA	NA	NA	NA	NA	NA	NA	NA	NA	NA	0	0	0	0	0	0	0	0	0	0
chrII:2675520-2675674	CELE11	NA	NA	NA	NA	NA	NA	NA	NA	-0.243866	-0.241678	0	-0.243076	-0.0567337	0	0	0	0	0	0	0	3.25676	0	0	0	0	6.13422
chrII:2835384-2835584	CELE11	NA	NA	NA	NA	NA	NA	NA	NA	0.180162	0.189887	-0.0172635	0.00282993	-0.264797	-0.0776585	-0.00767595	-0.318783	6.98554	7.13696	3.24809	3.72919	0	2.34792	3.31496	0	4.52509	4.88769
chrII:2856517-2856645	CELE11	NA	NA	NA	NA	NA	NA	NA	NA	-0.208188	0.0268097	0.447716	0.181119	-0.29776	0.325887	-0.364492	0.217316	5.44222	12.0431	14.5181	16.9162	3.91317	10.9751	0	9.37482	7.05073	14.7411
chrII:2856805-2856992	CELE11	NA	NA	NA	NA	NA	NA	NA	NA	0.6743	0.875091	-1.38698	0.48279	0.634657	-0.32542	0.132801	0.170905	11.1677	15.8941	0	7.2665	10.1171	12.9782	21.8632	22.6342	24.8649	0
chrII:2857326-2857534	CELE11	NA	NA	NA	NA	NA	NA	NA	NA	0.16476	0.0208665	0.41892	-0.226094	0.466352	0.561316	0.877004	0.633179	10.0455	7.43332	8.5506	3.26819	16.3465	10.7935	16.4783	12.0033	4.55424	9.4012
chrII:2997471-2997565	CELE11	NA	NA	NA	NA	NA	NA	NA	NA	-0.229552	0.205406	0.247349	-0.228184	-0.0764532	0.215223	0.278485	0	0	16.3533	5.96953	0	4.90254	4.9677	7.01375	0	0	10.3413
chrII:3473635-3473812	CELE11	NA	NA	NA	NA	NA	NA	NA	NA	NA	NA	NA	NA	NA	NA	NA	NA	0	0	0	0	0	0	0	0	0	0
chrII:3493317-3493424	CELE11	NA	NA	NA	NA	NA	NA	NA	NA	NA	NA	NA	NA	NA	NA	NA	NA	0	0	0	0	0	0	0	0	0	0
chrII:3621423-3621524	CELE11	NA	NA	NA	NA	NA	NA	NA	NA	NA	NA	0	NA	NA	0	0	0.297686	0	0	0	0	0	0	0	6.14874	0	0
chrII:3739318-3739519	CELE11	NA	NA	NA	NA	NA	NA	NA	NA	0	0.444464	0	0	0	0	0.428516	0	0	7.10163	0	0	0	0	3.4377	0	0	0
chrII:3741691-3741877	CELE11	NA	NA	NA	NA	NA	NA	NA	NA	-0.392551	-0.389886	NA	-0.170615	-0.406188	NA	NA	NA	0	0	0	4.00838	0	0	0	0	0	10.169
chrII:3744053-3744188	CELE11	NA	NA	NA	NA	NA	NA	NA	NA	NA	NA	NA	NA	NA	NA	NA	NA	0	0	0	0	0	0	0	0	0	0
chrII:3828453-3828649	CELE11	NA	NA	NA	NA	NA	NA	NA	NA	NA	NA	-0.329781	NA	NA	-0.0159403	-0.32557	-0.330061	0	0	0	0	0	3.32989	0	0	4.61697	0
chrII:3919851-3920038	CELE11	0.98709	0.813637	1	0.996051	0.376059	0.999728	0.864676	0.633578	0.0449479	0.522591	-0.17725	-0.0170407	0.644213	0.472013	-0.341385	0.599667	174.702	251.14	167.807	165.878	275.464	270.658	148.302	297.087	253.712	226.565
chrII:3998482-3998673	CELE11	NA	NA	NA	NA	NA	NA	NA	NA	0	0	NA	0	0.261956	NA	NA	NA	0	0	0	0	2.42574	0	0	0	0	0
chrII:4005671-4005870	CELE11	NA	NA	NA	NA	NA	NA	NA	NA	0	0	-0.325959	0	0.447962	-0.329053	-0.321826	-0.326235	0	0	0	0	7.18141	0	0	0	4.75918	0
chrII:4097915-4098096	CELE11	NA	NA	NA	NA	NA	NA	NA	NA	0	0.334987	NA	0	0	NA	NA	NA	0	4.26803	0	0	0	0	0	0	0	0
chrII:4098459-4098644	CELE11	NA	NA	NA	NA	NA	NA	NA	NA	NA	NA	NA	NA	NA	NA	NA	NA	0	0	0	0	0	0	0	0	0	0
chrII:4119592-4119781	CELE11	NA	NA	NA	NA	NA	NA	NA	NA	0	0	0.271909	0	0.388135	0.215631	0	0	0	0	3.43614	0	4.90254	2.48385	0	0	0	0
chrII:4121654-4121843	CELE11	NA	NA	NA	NA	NA	NA	NA	NA	-0.232476	-0.00177455	0.297403	-0.231706	-0.243475	0.714837	0.347195	0.301374	0	3.77508	2.98476	0	0	8.42027	3.65482	3.0641	0	5.17066
chrII:4133228-4133323	CELE11	NA	NA	NA	NA	NA	NA	NA	NA	0	0.334987	0	0	0	0	0	0	0	8.09148	0	0	0	0	0	0	0	0
chrII:4181702-4181906	CELE11	NA	NA	NA	NA	NA	NA	NA	NA	0.243471	0.264683	0.291616	0.24299	0.478705	0	0.332883	0	3.39232	3.78918	2.76637	3.33196	7.00625	0	3.38739	0	0	0
chrII:4383820-4384041	CELE11	NA	NA	NA	NA	NA	NA	NA	NA	0.240229	0	-0.0146951	0	0.186852	-0.0168412	-0.293374	-0.298748	3.13255	0	2.94084	0	2.27387	2.9549	0	0	4.09704	0
chrII:4390309-4390503	CELE11	NA	NA	NA	NA	NA	NA	NA	NA	NA	NA	NA	NA	NA	NA	NA	NA	0	0	0	0	0	0	0	0	0	0
chrII:4492907-4493071	CELE11	NA	NA	NA	NA	NA	NA	NA	NA	0.196522	-0.2487	0.763328	-0.253768	0.568912	0.661516	0.282714	0.46911	8.50966	0	13.748	0	17.4095	11.9271	4.20858	7.60208	0	5.95409
chrII:4517972-4518195	CELE11	NA	NA	NA	NA	NA	NA	NA	NA	-0.00924292	-0.264975	0.744349	0.216242	0.237278	0.52201	0	0.753889	3.13414	0	7.59516	6.39561	6.41197	5.03536	0	7.79705	0	4.38583
chrII:4518758-4518945	CELE11	NA	NA	NA	NA	NA	NA	NA	NA	0.243741	0	-0.0380376	0.455254	0.169138	0.187708	-0.00496486	0.813367	3.69907	0	3.47269	7.62031	2.47735	5.99957	3.6937	16.2015	4.838	0
chrII:4531456-4531641	CELE11	NA	NA	NA	NA	NA	NA	NA	NA	-0.328891	-0.324434	NA	-0.327286	-0.344888	NA	NA	NA	0	0	0	0	0	0	0	0	0	5.28186
chrII:4538333-4538517	CELE11	NA	NA	NA	NA	NA	NA	NA	NA	0	0	NA	0	0.388135	NA	NA	NA	0	0	0	0	5.03504	0	0	0	0	0
chrII:4542322-4542513	CELE11	NA	NA	NA	NA	NA	NA	NA	NA	NA	NA	NA	NA	NA	NA	NA	NA	0	0	0	0	0	0	0	0	0	0
chrII:4559693-4559897	CELE11	NA	NA	NA	NA	NA	NA	NA	NA	-0.230095	0.0097772	0	-0.00965585	-0.246264	0.273185	0	0	0	3.78918	0	3.33196	0	2.3021	0	0	0	4.79232
chrII:4622120-4622286	CELE11	NA	NA	NA	NA	NA	NA	NA	NA	NA	NA	-0.0470246	NA	NA	-0.309647	-0.301227	-0.306386	0	0	3.39584	0	0	0	0	0	5.69962	0
chrII:4666713-4666929	CELE11	NA	NA	NA	NA	NA	NA	NA	NA	NA	NA	NA	NA	NA	NA	NA	NA	0	0	0	0	0	0	0	0	0	0
chrII:4810476-4810608	CELE11	NA	NA	NA	NA	NA	NA	NA	NA	NA	NA	0	NA	NA	0	0.428516	0	0	0	0	0	0	0	5.22117	0	0	0
chrII:4812827-4813009	CELE11	NA	NA	NA	NA	NA	NA	NA	NA	0.400494	0.223716	-0.0572037	0	0.159243	0.1918	-0.375899	0.443025	7.67264	3.91948	3.09893	0	2.75846	6.1635	0	9.78979	4.97019	0
chrII:4846542-4846734	CELE11	NA	NA	NA	NA	NA	NA	NA	NA	-0.325255	-0.320798	0	-0.323651	-0.341653	0	0.422173	0	0	0	0	0	0	0	3.45237	0	0	4.92644
chrII:4847746-4847918	CELE11	NA	NA	NA	NA	NA	NA	NA	NA	0	0	-0.33571	0	0.271038	-0.0244861	-0.331515	-0.335989	0	0	0	0	2.91791	3.79184	0	0	5.50195	0
chrII:4874928-4875071	CELE11	0.98709	NA	1	NA	NA	0.999728	0.95452	0.725151	-0.444974	0.170714	0.154579	-0.111966	0.191459	0.297947	0.221445	-0.714893	77.5914	132.399	142.833	104.693	135.068	159.376	150.41	71.2291	167.454	154.719
chrII:4882348-4882517	CELE11	NA	NA	NA	NA	NA	NA	NA	NA	-0.0156296	0.370117	-0.347807	0.621848	0.357041	0.565498	0.560535	0.47615	8.18148	17.2269	3.84039	24.8902	16.6677	19.9045	19.7626	17.6523	11.1981	11.3719
chrII:4962130-4962308	CELE11	NA	NA	NA	NA	NA	NA	NA	NA	0	0	0	0.329288	0	0	0	0.584295	0	0	0	4.18752	0	0	0	6.5048	0	0
chrII:5042998-5043085	CELE11	NA	NA	NA	NA	NA	NA	NA	NA	0	0.334987	-0.0187938	0	0	-0.352682	-0.338026	0.211112	0	8.82707	7.41893	0	0	0	0	13.7426	10.3357	0
chrII:5177570-5177768	CELE11	NA	NA	NA	NA	NA	NA	NA	NA	-0.339758	-0.0702442	0	-0.339325	-0.345382	0	0.814203	0	0	10.813	0	0	0	0	10.1861	0	0	19.1116
chrII:5287194-5287292	CELE11	NA	NA	NA	NA	NA	NA	NA	NA	NA	NA	NA	NA	NA	NA	NA	NA	0	0	0	0	0	0	0	0	0	0
chrII:5312761-5312878	CELE11	NA	NA	NA	NA	NA	NA	NA	NA	-0.00961113	0.0131439	0.221838	-0.21585	-0.542431	0.38356	0.281455	0.810513	11.8991	12.6614	10.3387	6.35226	0	13.5581	11.5315	25.0499	8.06642	16.3833
chrII:5322605-5322706	CELE11	NA	NA	NA	NA	NA	NA	NA	NA	-0.222936	0.188857	0	-0.221631	-0.070826	0.760653	0.361549	0.818053	0	14.064	0	0	4.56609	15.6848	6.53242	17.564	0	9.3216
chrII:5328314-5328540	CELE11	0.98709	NA	1	NA	NA	NA	NA	NA	0.306602	-0.557774	-0.909927	-0.102792	0.0813163	-0.383977	-0.150283	0.32264	43.0355	16.061	11.1264	28.2534	34.2041	20.3326	26.4174	42.0257	40.9996	42.3035
chrII:5333118-5333322	CELE11	0.7554	NA	1	NA	NA	0.999728	NA	NA	-1.3658	-1.30001	-0.811116	-1.43	-1.31526	-0.308304	-0.467609	0.655846	30.6278	32.9413	26.5707	28.9269	32.5688	43.51	36.5757	93.73	72.8456	150.269
chrII:5401076-5401123	CELE11	NA	NA	NA	NA	NA	NA	NA	NA	-0.243866	-0.241678	0	-0.243076	-0.0567337	0.273694	0.283361	0.268447	0	0	0	0	10.5166	13.6664	13.8814	13.0661	0	19.8084
chrII:5441498-5441621	CELE11	NA	NA	NA	NA	NA	NA	NA	NA	NA	NA	NA	NA	NA	NA	NA	NA	0	0	0	0	0	0	0	0	0	0
chrII:5464329-5464544	CELE11	NA	NA	NA	NA	NA	NA	NA	NA	-0.712124	0.197295	-0.0592435	-0.708855	-0.761582	-0.555814	-0.236407	-0.564421	0	14.1093	8.67054	0	0	3.03699	6.29964	2.69528	12.6326	13.352
chrII:5520507-5520582	CELE11	NA	NA	NA	NA	NA	NA	NA	NA	NA	NA	NA	NA	NA	NA	NA	NA	0	0	0	0	0	0	0	0	0	0
chrII:5576793-5577013	CELE11	NA	NA	NA	NA	NA	NA	NA	NA	0	0	0	0.248162	0.183828	0	0	0.395186	0	0	0	3.3917	2.28416	0	0	2.6343	0	0
chrII:5763609-5763831	CELE11	NA	NA	NA	NA	NA	NA	NA	NA	0.238507	0.469643	0.788116	0	0.331893	0.318128	0.339863	0	3.1185	6.96666	8.39837	0	4.3522	2.94165	2.98792	0	0	0
chrII:5777776-5777982	CELE11	NA	NA	NA	NA	NA	NA	NA	NA	NA	NA	NA	NA	NA	NA	NA	NA	0	0	0	0	0	0	0	0	0	0
chrII:5783448-5783629	CELE11	NA	NA	NA	NA	NA	NA	NA	NA	-0.24701	-0.244826	0.204958	-0.246222	-0.0612126	0.119993	-0.354133	-0.0424646	0	0	6.70314	0	2.77362	5.18606	0	3.446	5.22987	5.39794
chrII:6018408-6018603	CELE11	NA	NA	NA	NA	NA	NA	NA	NA	0	0	0.391579	0	0.261956	0	0	0	0	0	2.89339	0	2.37623	0	0	0	0	0
chrII:6102340-6102449	CELE11	NA	NA	NA	NA	NA	NA	NA	NA	NA	NA	0.391579	NA	NA	0	0	0	0	0	5.1555	0	0	0	0	0	0	0
chrII:6255634-6255825	CELE11	NA	NA	NA	NA	NA	NA	NA	NA	NA	NA	NA	NA	NA	NA	NA	NA	0	0	0	0	0	0	0	0	0	0
chrII:6304613-6304834	CELE11	NA	NA	NA	NA	NA	NA	NA	NA	-0.0168222	-0.323135	0.317685	-0.539915	-0.84167	-0.0702601	-0.295337	-0.0676764	12.5302	6.46185	10.6044	3.07681	0	5.90981	3.128	5.6502	8.3846	17.4165
chrII:6307451-6307674	CELE11	NA	NA	NA	NA	NA	NA	NA	NA	0.241139	0	NA	0	0.186466	NA	NA	NA	3.13414	0	0	0	2.25356	0	0	0	0	0
chrII:6436475-6436585	CELE11	NA	NA	NA	NA	NA	NA	NA	NA	NA	NA	NA	NA	NA	NA	NA	NA	0	0	0	0	0	0	0	0	0	0
chrII:6524009-6524193	CELE11	NA	NA	NA	NA	NA	NA	NA	NA	-0.00437727	-0.249317	0.219341	-0.00567568	0.488664	-0.450658	0.719733	0.797909	3.79485	0	6.59444	3.69217	13.221	0	14.7105	15.9778	5.14506	5.13948
chrII:6582574-6582771	CELE11	NA	NA	NA	NA	NA	NA	NA	NA	NA	NA	0.391579	NA	NA	0	0	0	0	0	2.86417	0	0	0	0	0	0	0
chrII:6583208-6583387	CELE11	NA	NA	NA	NA	NA	NA	NA	NA	NA	NA	0.391579	NA	NA	0	0	0	0	0	3.15058	0	0	0	0	0	0	0
chrII:7091988-7092052	CELE11	NA	NA	NA	NA	NA	NA	NA	NA	-0.0120451	-0.215387	-0.332822	0.180268	-0.00677754	-0.33596	-0.00786683	-0.3331	21.4996	11.0348	0	32.5487	21.4958	0	10.6833	0	14.6436	29.742
chrII:7177069-7177209	CELE11	NA	NA	NA	NA	NA	NA	NA	NA	0	0.247126	0	0.25102	0.336398	0	0	0.395186	0	5.08698	0	5.31607	6.88326	0	0	4.12893	0	0
chrII:7178265-7178415	CELE11	NA	NA	NA	NA	NA	NA	NA	NA	0	0	NA	0	0.271038	NA	NA	NA	0	0	0	0	3.34304	0	0	0	0	0
chrII:7315706-7315797	CELE11	NA	NA	NA	NA	NA	NA	NA	NA	NA	NA	0	NA	NA	0.313235	0	0.307142	0	0	0	0	0	7.13031	0	6.81708	0	0
chrII:7322515-7322715	CELE11	NA	NA	1	NA	NA	NA	NA	NA	-0.483105	0.12714	0.35454	-0.213829	-1.86938	0.0646801	0.571644	0.33299	20.8578	40.7338	21.8833	28.5098	0	15.0032	27.4986	21.1703	18.7316	47.9329
chrII:7401267-7401381	CELE11	NA	NA	NA	NA	NA	NA	NA	NA	0.439427	0	-0.32324	0.237807	0	-0.332478	-0.674387	-0.691242	12.1519	0	5.67709	5.93958	0	5.70425	0	0	16.1859	0
chrII:7686644-7686836	CELE11	NA	NA	NA	NA	NA	NA	NA	NA	0	0.326125	0	0	0	0	0.610568	0	0	3.7164	0	0	0	0	7.05037	0	0	0
chrII:7840094-7840306	CELE11	NA	NA	NA	NA	NA	NA	NA	NA	0	0.400938	NA	0.210769	0.302778	NA	NA	NA	0	6.73488	0	3.20681	4.73989	0	0	0	0	0
chrII:8078747-8078858	CELE11	NA	NA	NA	NA	NA	NA	NA	NA	-0.539725	-1.10615	0.0135	-0.902815	-0.0423361	-1.00001	0.263546	-0.119472	25.014	6.40415	31.1463	12.1973	47.4861	4.21367	42.899	26.3919	40.9823	69.0439
chrII:8540349-8540475	CELE11	NA	NA	NA	NA	NA	NA	NA	NA	NA	NA	0	NA	NA	0.410642	0	0	0	0	0	0	0	5.16527	0	0	0	0
chrII:8640171-8640385	CELE11	NA	NA	NA	NA	NA	NA	NA	NA	0.205325	0.228661	0.23149	-0.267105	0.0720037	-0.102856	-0.36163	-0.377574	6.49987	6.94906	6.07317	0	4.33248	2.19503	0	0	4.42715	4.56942
chrII:8801408-8801561	CELE11	NA	NA	NA	NA	NA	NA	NA	NA	NA	NA	NA	NA	NA	NA	NA	NA	0	0	0	0	0	0	0	0	0	0
chrII:8950454-8950678	CELE11	NA	NA	NA	NA	NA	NA	NA	NA	0.244839	0.470216	-0.287829	0	0.179826	-0.573584	-0.251761	-0.283746	3.09078	6.64021	2.52047	0	2.24355	0	2.96136	2.58747	8.08483	0
chrII:9012256-9012363	CELE11	NA	NA	NA	NA	NA	NA	NA	NA	0.215458	0	0	0.393276	0.158755	0.211696	0	0.470833	6.43913	0	0	12.6491	4.67406	4.36973	0	11.6143	0	0
chrII:9130087-9130288	CELE11	0.98709	NA	1	NA	NA	0.999728	NA	NA	0.646164	0.127572	-0.793475	-0.129615	0.280112	-0.0982204	-0.121501	0.00943465	55.2799	32.5466	20.9258	24.3287	38.4372	41.4226	40.4175	45.6812	59.5819	38.2818
chrII:9184827-9184894	CELE11	NA	NA	NA	NA	NA	NA	NA	NA	-0.00790261	-0.231604	NA	-0.232969	-0.244775	NA	NA	NA	10.2268	0	0	0	0	0	0	0	0	14.4474
chrII:9188770-9188924	CELE11	NA	NA	NA	NA	NA	NA	NA	NA	0	0	0.391579	0	0.261956	0	0	0	0	0	3.65874	0	3.00478	0	0	0	0	0
chrII:9342008-9342150	CELE11	NA	NA	NA	NA	NA	NA	NA	NA	0.195009	-0.249977	0.454854	-0.252868	-0.0835563	-0.0554727	-0.386589	-0.0508738	9.77254	0	13.0968	0	3.25693	4.58733	0	4.38582	6.6562	6.87011
chrII:9565549-9565768	CELE11	NA	NA	NA	NA	NA	NA	NA	NA	-0.00834745	-0.217627	0.46123	-0.220114	0.213089	0.190918	-0.288356	0.604222	3.16103	0	13.2786	0	6.88362	8.58057	3.15643	16.0821	8.46082	4.46557
chrII:9614431-9614535	CELE11	NA	NA	NA	NA	NA	NA	NA	NA	NA	NA	0	NA	NA	0	0	0.406893	0	0	0	0	0	0	0	5.97306	0	0
chrII:9828157-9828312	CELE11	NA	NA	NA	NA	NA	NA	NA	NA	0	0	NA	0.329288	0	NA	NA	NA	0	0	0	4.80491	0	0	0	0	0	0
chrII:9899800-9900022	CELE11	NA	NA	NA	NA	NA	NA	NA	NA	-0.232476	-0.00177455	-0.441721	-0.231706	-0.243475	-0.447625	-0.432106	-0.442321	0	3.21643	0	0	0	0	0	0	4.07867	4.40549
chrII:9953037-9953192	CELE11	NA	NA	NA	NA	NA	NA	NA	NA	0.227868	0	0	0.226059	0	0	0	0	4.45786	0	0	4.37853	0	0	0	0	0	0
chrII:9960460-9960674	CELE11	NA	NA	NA	NA	NA	NA	NA	NA	-0.250432	0.0105685	-0.322051	-0.248878	0.0885362	-0.648292	-0.00702823	-0.318171	0	3.61294	2.6377	0	4.51414	0	6.32894	2.70781	8.46087	4.56942
chrII:9977779-9977903	CELE11	NA	NA	NA	NA	NA	NA	NA	NA	0	0	0	0	0.271038	0	0.321711	0.306692	0	0	0	0	4.03839	0	5.33045	5.01737	0	0
chrII:10004586-10004717	CELE11	NA	NA	NA	NA	NA	NA	NA	NA	NA	NA	NA	NA	NA	NA	NA	NA	0	0	0	0	0	0	0	0	0	0
chrII:10012132-10012327	CELE11	NA	NA	NA	NA	NA	NA	NA	NA	0.378527	0.0142048	1.15956	0.219475	0.460799	0.399612	0.546666	-0.445088	10.7118	3.96317	22.004	7.64863	12.0804	8.16251	10.342	0	4.64053	5.01237
chrII:10070734-10070918	CELE11	NA	NA	NA	NA	NA	NA	NA	NA	0	0	0.460466	0.329288	0	-0.421569	-0.0193102	-0.40883	0	0	10.1234	4.05171	0	0	3.60166	0	5.14506	0
chrII:10095050-10095223	CELE11	NA	NA	NA	NA	NA	NA	NA	NA	-0.179725	-0.160288	-0.107619	-0.57878	-0.353083	0.0449003	0.179768	-0.344569	12.0662	12.3666	10.2706	3.92558	8.47896	12.9646	15.4789	6.9503	16.1679	22.4028
chrII:10202663-10202885	CELE11	NA	NA	NA	NA	NA	NA	NA	NA	NA	NA	NA	NA	NA	NA	NA	NA	0	0	0	0	0	0	0	0	0	0
chrII:10212733-10212896	CELE11	NA	NA	NA	NA	NA	NA	NA	NA	0	0.246961	-0.315611	0	0.325616	-0.321425	-0.307829	0.190103	0	4.73648	0	0	5.91793	0	0	7.64844	5.80388	0
chrII:10215812-10215873	CELE11	NA	NA	NA	NA	NA	NA	NA	NA	NA	NA	0.254334	NA	NA	0	0.287472	0.492733	0	0	9.14685	0	0	0	10.7469	20.2313	0	0
chrII:10289286-10289495	CELE11	NA	NA	NA	NA	NA	NA	NA	NA	-0.0136639	0.69129	0.123928	-0.236212	-0.178399	-0.391485	0.185559	-0.646839	6.65463	21.0601	12.0272	3.56936	4.62162	5.37105	12.9593	2.77228	13.3963	9.20585
chrII:10372119-10372327	CELE11	NA	NA	NA	NA	NA	NA	NA	NA	0.628408	0	0	0.246137	0	0	0	0.302618	10.0139	0	0	3.26819	0	0	0	2.78555	0	0
chrII:10424363-10424512	CELE11	NA	NA	NA	NA	NA	NA	NA	NA	NA	NA	-0.307514	NA	NA	-0.311213	-0.302534	-0.0302319	0	0	0	0	0	0	0	4.18114	6.34558	0
chrII:10467609-10467805	CELE11	NA	NA	NA	NA	NA	NA	NA	NA	NA	NA	-0.342827	NA	NA	-0.346025	-0.33859	-0.0445075	0	0	0	0	0	0	0	2.95523	4.83166	0
chrII:10525493-10525675	CELE11	NA	NA	NA	NA	NA	NA	NA	NA	NA	NA	0	NA	NA	0.307705	0.324345	0	0	0	0	0	0	3.58464	3.79462	0	0	0
chrII:10622615-10622835	CELE11	NA	NA	NA	NA	NA	NA	NA	NA	0	0	0	0.318963	0	0	0.428516	0	0	0	0	3.09073	0	0	3.14215	0	0	0
chrII:10672453-10672613	CELE11	NA	NA	NA	NA	NA	NA	NA	NA	NA	NA	0	NA	NA	0	0.422173	0	0	0	0	0	0	0	4.13855	0	0	0
chrII:10693218-10693436	CELE11	NA	NA	NA	NA	NA	NA	NA	NA	-0.0108299	0.00173378	0.183429	0.540796	-0.0981764	-0.371363	-0.351073	0.410676	3.17546	3.27518	5.17904	12.7795	2.30502	0	0	8.38595	4.34629	4.48596
chrII:10694071-10694152	CELE11	NA	NA	NA	NA	NA	NA	NA	NA	NA	NA	NA	NA	NA	NA	NA	NA	0	0	0	0	0	0	0	0	0	0
chrII:10725178-10725379	CELE11	NA	NA	NA	NA	NA	NA	NA	NA	0	0	NA	0.318963	0	NA	NA	NA	0	0	0	3.38144	0	0	0	0	0	0
chrII:10758449-10758657	CELE11	NA	NA	NA	NA	NA	NA	NA	NA	0.321033	0	0.834447	0	0	0.569485	0	0.337393	3.35908	0	8.96094	0	0	5.39675	0	3.00082	0	0
chrII:10803937-10804128	CELE11	NA	NA	NA	NA	NA	NA	NA	NA	0	0.232754	0	0.224806	0	0.359866	0	0	0	3.73575	0	3.55756	0	2.45798	0	0	0	0
chrII:10980537-10980757	CELE11	NA	NA	NA	NA	NA	NA	NA	NA	-0.247502	0.208985	0.22341	0.00726779	0.345012	0.599074	-0.0216991	-0.0596187	0	6.49108	5.52023	3.3917	8.60644	10.2074	3.01496	2.83788	4.30695	4.30228
chrII:10988968-10989182	CELE11	NA	NA	NA	NA	NA	NA	NA	NA	0.21526	-0.263947	0.546824	-0.269482	0.517018	0	0.597764	0.289565	6.49987	0	5.67428	0	11.3762	0	6.45968	2.70781	0	4.42234
chrII:10992951-10993171	CELE11	NA	NA	NA	NA	NA	NA	NA	NA	0	0.246278	0.213487	0.444706	0.321858	-0.0933947	-0.0171059	-0.0511632	0	3.24554	5.90829	6.48243	4.21486	2.13544	3.01496	2.6343	4.30695	0
chrII:11008269-11008487	CELE11	NA	NA	NA	NA	NA	NA	NA	NA	-0.0167901	0.521457	0.590632	-0.353998	0.0170235	1.17831	0.702469	-0.415748	12.8228	27.0168	10.3581	6.54163	13.6518	21.9158	12.555	0	4.34629	17.6551
chrII:11014920-11015121	CELE11	NA	NA	NA	NA	NA	NA	NA	NA	0	0	0.4314	0.329288	0	0	0.266886	0	0	0	5.6149	3.71072	0	0	3.29855	0	0	0
chrII:11060818-11060967	CELE11	NA	NA	NA	NA	NA	NA	NA	NA	0	0	NA	0	0.445067	NA	NA	NA	0	0	0	0	9.31483	0	0	0	0	0
chrII:11070397-11070581	CELE11	NA	NA	NA	NA	NA	NA	NA	NA	-0.328891	-0.324434	-0.335247	-0.327286	-0.344888	-0.338399	-0.0156486	-0.335526	0	0	0	0	0	0	3.60166	0	5.14506	5.31041
chrII:11073075-11073292	CELE11	NA	NA	NA	NA	NA	NA	NA	NA	0.244972	0	0.725839	0	0.731749	0	0.33629	0.547148	3.2204	0	7.8042	0	11.2196	0	3.18539	5.54748	0	0
chrII:11084019-11084203	CELE11	NA	NA	NA	NA	NA	NA	NA	NA	-0.402167	-0.392847	0.249186	-0.654589	-0.480548	0	0	0.266073	3.79485	3.87711	3.06543	0	2.72864	0	0	3.39012	0	15.7603
chrII:11147818-11148007	CELE11	NA	NA	NA	NA	NA	NA	NA	NA	NA	NA	0.413557	NA	NA	0	0	0	0	0	3.43614	0	0	0	0	0	0	0
chrII:11148799-11148976	CELE11	NA	NA	NA	NA	NA	NA	NA	NA	0	0.326125	NA	0	0	NA	NA	NA	0	4.02958	0	0	0	0	0	0	0	0
chrII:11161905-11162050	CELE11	NA	NA	NA	NA	NA	NA	NA	NA	-0.291375	-0.426665	-0.123168	0.0874955	-0.979735	-1.03917	0.251653	0.00240184	19.1435	14.7383	20.5962	33.2046	3.45752	3.23241	32.7163	23.9252	32.3075	40.157
chrII:11184074-11184270	CELE11	NA	NA	NA	NA	NA	NA	NA	NA	0	0	0.291616	0.208745	0.288541	0	0.332883	0	0	0	2.87871	3.8049	5.12486	0	3.52495	0	0	0
chrII:11201064-11201277	CELE11	NA	NA	NA	NA	NA	NA	NA	NA	0	0.252868	0.413557	0	0.182426	0	0	0	0	3.62982	3.05078	0	2.35887	0	0	0	0	0
chrII:11278231-11278454	CELE11	NA	NA	NA	NA	NA	NA	NA	NA	NA	NA	0	NA	NA	0.359866	0	0	0	0	0	0	0	2.10684	0	0	0	0
chrII:11307708-11307887	CELE11	NA	NA	NA	NA	NA	NA	NA	NA	0	0.278641	0.142812	0.823227	0.179751	-0.382527	-0.0090772	-0.0535461	0	4.31546	9.9282	15.918	2.80444	2.62184	7.55956	6.96857	10.106	0
chrII:11386240-11386455	CELE11	NA	NA	NA	NA	NA	NA	NA	NA	0.772678	0.211807	0.970111	-0.246211	0.0776184	0.31113	0.644852	0.586765	19.348	6.64134	10.5019	0	4.67406	3.03699	6.29964	5.59885	0	4.40187
chrII:11488492-11488670	CELE11	NA	NA	NA	NA	NA	NA	NA	NA	0	0.444464	0	0	0	0	0	0.31229	0	8.01413	0	0	0	0	0	3.50375	0	0
chrII:11561940-11562164	CELE11	NA	NA	NA	NA	NA	NA	NA	NA	0	0	NA	0	0.271038	NA	NA	NA	0	0	0	0	2.24355	0	0	0	0	0
chrII:11602082-11602273	CELE11	NA	NA	NA	NA	NA	NA	NA	NA	0.319981	0	0	0	0	0	0	0	3.62201	0	0	0	0	0	0	0	0	0
chrII:11616578-11616638	CELE11	NA	NA	NA	NA	NA	NA	NA	NA	-0.482026	-0.473291	0.959017	0.00201304	0.161673	-0.181637	-0.720945	0.151979	0	0	79.9981	23.4855	31.821	15.4732	0	29.3694	30.5144	31.1739
chrII:11647375-11647567	CELE11	NA	NA	NA	NA	NA	NA	NA	NA	0.250083	0	0.247911	0.638147	0.168504	0	0	0	3.63755	0	2.93837	10.962	2.41317	0	0	0	0	0
chrII:11715713-11715872	CELE11	NA	NA	NA	NA	NA	NA	NA	NA	0.221031	0.57867	0	0	0.149693	0	0.582276	0.74993	4.34641	13.4487	0	0	2.91089	0	8.32883	11.4783	0	0
chrII:11715971-11716115	CELE11	NA	NA	NA	NA	NA	NA	NA	NA	NA	NA	NA	NA	NA	NA	NA	NA	0	0	0	0	0	0	0	0	0	0
chrII:11716110-11716261	CELE11	NA	NA	NA	NA	NA	NA	NA	NA	0.241139	0	-0.0669393	0	0.186466	-0.264802	-0.54789	-0.280434	4.61873	0	7.46191	0	3.32104	4.31572	0	3.83013	11.9677	0
chrII:11716276-11716431	CELE11	NA	NA	NA	NA	NA	NA	NA	NA	-0.414812	-0.411205	-0.0552828	-0.197192	-0.262822	-0.4108	0.282223	0.459341	0	0	3.63529	4.37853	2.98552	0	8.72257	11.7726	5.83041	12.5952
chrII:11740146-11740323	CELE11	NA	NA	NA	NA	NA	NA	NA	NA	0.406141	0.00951066	-0.0776013	0.00625615	1.05822	-0.123606	-0.303749	0.329433	11.7579	4.02958	6.85377	4.21105	29.44	6.33663	3.90121	13.3355	10.4572	5.34159
chrII:11786661-11786776	CELE11	NA	NA	NA	NA	NA	NA	NA	NA	NA	NA	0.413557	NA	NA	0	0	0	0	0	5.62815	0	0	0	0	0	0	0
chrII:11830051-11830256	CELE11	NA	NA	NA	NA	NA	NA	NA	NA	-0.0074612	-0.195054	-0.324965	-0.44335	0.145505	-0.0257865	-0.314776	-0.0282673	6.75171	3.48187	0	0	9.42272	3.18441	0	3.04452	4.41526	9.2311
chrII:11851923-11852094	CELE11	NA	NA	1	NA	NA	NA	NA	NA	0.349279	0.216864	0.415281	0.202168	0.630526	-0.43675	0.134792	0.161969	12.245	9.03235	32.1671	8.71589	20.09	10.9751	23.8969	24.4781	26.932	5.71177
chrII:11890209-11890392	CELE11	NA	NA	NA	NA	NA	NA	NA	NA	-0.39795	0.307257	-0.0469287	-0.638496	-0.31518	-0.341798	-0.00874343	-0.0296362	3.77949	20.4613	3.08209	0	5.48694	0	3.62123	3.40854	4.94317	16.0178
chrII:11933240-11933389	CELE11	NA	NA	NA	NA	NA	NA	NA	NA	0	0	0.591208	0	0.261956	0	0	0	0	0	8.13314	0	3.10494	0	0	0	0	0
chrII:11936270-11936481	CELE11	NA	NA	NA	NA	NA	NA	NA	NA	-0.328891	-0.324434	0	-0.327286	-0.344888	0.359866	0	0	0	0	0	0	0	2.22609	0	0	0	4.63408
chrII:12083283-12083487	CELE11	NA	NA	NA	NA	NA	NA	NA	NA	0.151468	-0.697049	-0.307795	0.446585	0.19649	-0.160489	-0.224401	-0.317989	13.6016	0	8.71744	20.6407	14.3935	11.0041	10.0251	8.5197	18.1598	14.2227
chrII:12109510-12109693	CELE11	NA	NA	NA	NA	NA	NA	NA	NA	-0.224627	-0.00141304	0	-0.223624	-0.0613275	0	0	0.395186	0	3.89818	0	0	2.74347	0	0	3.16402	0	5.33927
chrII:12109708-12109892	CELE11	NA	NA	NA	NA	NA	NA	NA	NA	NA	NA	0	NA	NA	0	0.864009	0	0	0	0	0	0	0	14.4066	0	0	0
chrII:12110563-12110733	CELE11	NA	NA	NA	NA	NA	NA	NA	NA	0	0.245189	NA	0	0.185678	NA	NA	NA	0	4.19453	0	0	2.95204	0	0	0	0	0
chrII:12342208-12342348	CELE11	NA	NA	NA	NA	NA	NA	NA	NA	-0.188237	-0.180693	0.332475	-0.407096	-0.0998934	0.809769	0	0.637977	4.97906	5.08698	4.02202	0	7.16026	11.3465	0	8.57696	0	13.4866
chrII:12342409-12342514	CELE11	NA	NA	NA	NA	NA	NA	NA	NA	NA	NA	0	NA	NA	0	0	0	0	0	0	0	0	0	0	0	0	0
chrII:12351520-12351695	CELE11	NA	NA	NA	NA	NA	NA	NA	NA	0.252348	0.263086	0.449787	0.264327	0.855168	0.382496	0.527053	0.824525	3.9889	4.07537	10.1538	4.2589	16.5433	9.09006	11.5172	17.0505	5.40816	0
chrII:12351692-12351879	CELE11	NA	NA	NA	NA	NA	NA	NA	NA	-0.412776	-0.186506	-0.72343	-0.196209	0.00161673	-0.770708	-0.419259	-1.01147	0	3.81524	6.48921	3.63325	7.43205	5.99957	10.7821	3.33602	25.0899	10.4513
chrII:12618708-12618920	CELE11	NA	NA	NA	NA	NA	NA	NA	NA	NA	NA	-0.444306	NA	NA	-0.450092	-0.434691	-0.444906	0	0	0	0	0	0	0	0	4.46872	0
chrII:12761384-12761575	CELE11	NA	NA	NA	NA	NA	NA	NA	NA	NA	NA	0.31262	NA	NA	0.276337	0	0	0	0	2.95367	0	0	2.45798	0	0	0	0
chrII:12903346-12903430	CELE11	NA	NA	NA	NA	NA	NA	NA	NA	NA	NA	NA	NA	NA	NA	NA	NA	0	0	0	0	0	0	0	0	0	0
chrII:12906774-12906915	CELE11	NA	NA	NA	NA	NA	NA	NA	NA	-0.455371	-0.19242	NA	-0.454079	-0.474173	NA	NA	NA	0	5.4703	0	0	0	0	0	0	0	13.6143
chrII:12911536-12911751	CELE11	NA	NA	NA	NA	NA	NA	NA	NA	NA	NA	0.245652	NA	NA	0.213759	0	0	0	0	2.62549	0	0	2.18487	0	0	0	0
chrII:12935823-12936025	CELE11	NA	NA	NA	NA	NA	NA	NA	NA	NA	NA	0	NA	NA	0	0.422173	0	0	0	0	0	0	0	3.2823	0	0	0
chrII:12949041-12949214	CELE11	NA	NA	NA	NA	NA	NA	NA	NA	-0.559055	-0.323661	0.431982	-0.557286	-0.270394	0.259184	0	0	0	4.46427	6.51845	0	5.35335	3.77005	0	0	0	16.3932
chrII:12951950-12952150	CELE11	NA	NA	NA	NA	NA	NA	NA	NA	NA	NA	0	NA	NA	0.221297	0.293851	0	0	0	0	0	0	2.34792	3.4548	0	0	0
chrII:12962521-12962696	CELE11	NA	NA	NA	NA	NA	NA	NA	NA	0	0	NA	0	0.261956	NA	NA	NA	0	0	0	0	2.64626	0	0	0	0	0
chrII:12964549-12964726	CELE11	NA	NA	NA	NA	NA	NA	NA	NA	-0.328891	-0.324434	0.391579	-0.327286	-0.344888	0	0	0	0	0	3.18598	0	0	0	0	0	0	5.51924
chrII:13058876-13059079	CELE11	NA	NA	NA	NA	NA	NA	NA	NA	-0.325255	-0.320798	0.823751	-0.323651	-0.341653	0.275908	0.657544	0	0	0	8.76018	0	0	2.31339	6.6702	0	0	4.6608
chrII:13077194-13077381	CELE11	NA	NA	NA	NA	NA	NA	NA	NA	-0.229369	0.00277084	0.391579	-0.228597	-0.240408	0	0	0	0	3.81524	3.01652	0	0	0	0	0	0	5.05746
chrII:13094434-13094545	CELE11	NA	NA	NA	NA	NA	NA	NA	NA	0	0	0	0.318963	0	0.410642	0	0	0	0	0	6.09867	0	5.85704	0	0	0	0
chrII:13162996-13163168	CELE11	NA	NA	NA	NA	NA	NA	NA	NA	0.568787	0.429498	1.03594	0.562486	0.411242	0	0.923421	1.05765	12.1742	8.63611	13.608	11.8448	8.07644	0	11.8794	14.241	0	0
chrII:13173190-13173362	CELE11	NA	NA	NA	NA	NA	NA	NA	NA	0	0	NA	0	0.271038	NA	NA	NA	0	0	0	0	2.91791	0	0	0	0	0
chrII:13285088-13285288	CELE11	0.98709	NA	1	NA	NA	0.999728	NA	NA	0.470178	-0.576788	0.748188	0.571859	0.525298	0.490708	0.72828	0.530317	41.7156	10.7054	55.0522	46.163	43.6513	43.9766	54.0182	45.6847	36.832	33.7418
chrII:13354089-13354298	CELE11	NA	NA	NA	NA	NA	NA	NA	NA	-0.0087164	-0.000564263	0.515349	-0.228988	0.0680646	0.238818	0	0	3.31155	3.41555	5.80939	0	4.43563	2.24729	0	0	0	4.67821
chrII:13354814-13355001	CELE11	NA	NA	NA	NA	NA	NA	NA	NA	0	0	0	0	0.453611	0	0	0	0	0	0	0	8.05529	0	0	0	0	0
chrII:13355305-13355492	CELE11	NA	NA	NA	NA	NA	NA	NA	NA	0	0.334987	-0.444306	0	0	-0.450092	-0.434691	-0.444906	0	4.13182	0	0	0	0	0	0	5.06296	0
chrII:13476622-13476743	CELE11	0.98709	NA	1	NA	NA	0.999728	0.967446	NA	0.0518395	-0.0702675	-1.38348	0.153967	-0.0850734	0.175444	0.202872	-0.553567	68.7282	60.2557	39.2961	76.0554	60.1446	151.135	155.227	84.0737	174.938	87.8017
chrII:13792484-13792681	CELE11	NA	NA	NA	NA	NA	NA	NA	NA	0	0	-0.335052	0.318963	0	-0.338255	-0.33081	-0.335333	0	0	0	3.44975	0	0	0	0	4.59366	0
chrII:13832827-13832996	CELE11	0.7554	NA	1	NA	NA	0.999728	0.994233	NA	1.22914	-1.71681	1.02598	-0.678489	0.410656	0.0352013	0.0604222	0.782153	225.419	8.78851	100.468	41.7445	113.722	42.113	44.106	82.4707	55.2441	107.754
chrII:13918780-13919011	CELE11	NA	NA	NA	NA	NA	NA	NA	NA	NA	NA	-0.444306	NA	NA	-0.450092	-0.434691	-0.444906	0	0	0	0	0	0	0	0	4.10275	0
chrII:13955998-13956151	CELE11	NA	NA	NA	NA	NA	NA	NA	NA	-0.00790261	-0.231604	0.311674	-0.232969	-0.244775	0.512939	0.899241	0.828526	4.51575	0	3.6825	0	0	6.12898	13.1625	11.6333	0	6.37938
chrII:13991979-13992190	CELE11	NA	NA	NA	NA	NA	NA	NA	NA	NA	NA	NA	NA	NA	NA	NA	NA	0	0	0	0	0	0	0	0	0	0
chrII:14110198-14110317	CELE11	NA	NA	NA	NA	NA	NA	NA	NA	0.198287	0	0	0	0.286871	0.410642	0	0	5.85039	0	0	0	8.41331	5.46657	0	0	0	0
chrII:14429279-14429487	CELE11	NA	NA	NA	NA	NA	NA	NA	NA	NA	NA	0.522663	NA	NA	0	0	0	0	0	5.83718	0	0	0	0	0	0	0
chrII:14431469-14431649	CELE11	NA	NA	NA	NA	NA	NA	NA	NA	NA	NA	0	NA	NA	0	0	0.406893	0	0	0	0	0	0	0	3.46504	0	0
chrII:14497603-14497807	CELE11	NA	NA	NA	NA	NA	NA	NA	NA	0	0	0.193985	0	0.392283	-0.11236	0.49882	0.223695	0	0	5.53273	0	4.73434	2.3021	10.0251	6.11875	4.4368	0
chrII:14568740-14568845	CELE11	NA	NA	NA	NA	NA	NA	NA	NA	0	0.214183	0	0	0.2721	0.265548	0.342992	0	0	7.32813	0	0	8.78758	4.45218	6.55109	0	0	0
chrII:14705760-14705880	CELE11	NA	NA	NA	NA	NA	NA	NA	NA	NA	NA	NA	NA	NA	NA	NA	NA	0	0	0	0	0	0	0	0	0	0
chrII:14903527-14903629	CELE11	NA	NA	NA	NA	NA	NA	NA	NA	0	0	NA	0	0.271038	NA	NA	NA	0	0	0	0	4.90096	0	0	0	0	0
chrII:14959479-14959677	CELE11	0.98709	0.985288	1	0.941191	0.307132	0.999728	0.987144	0.93105	0.539	-0.0733642	0.126714	0.189517	0.750865	0.134356	-0.0831586	-0.337913	192.902	118.928	163.8	147.08	226.098	165.817	139.963	115.24	197.702	170.087
chrII:15203069-15203230	CELE11	NA	NA	NA	NA	NA	NA	NA	NA	0.246771	0.472962	1.24565	0.651945	1.09297	1.29288	0.931918	1.53317	4.33362	8.85512	19.0914	13.4703	26.1156	19.7513	12.686	26.2668	0	0
chrII:599739-599836	CELE11	NA	NA	NA	NA	NA	NA	NA	NA	-0.257427	-0.250151	-0.0172761	0.543112	0.08884	-0.319977	-0.307238	-0.315007	0	0	6.6619	29.9158	10.302	0	0	0	9.28106	10.0247
chrII:603925-604018	CELE11	NA	NA	NA	NA	NA	NA	NA	NA	0	0.245189	NA	0	0.185678	NA	NA	NA	0	7.63048	0	0	5.3702	0	0	0	0	0
chrII:622827-622947	CELE11	NA	NA	NA	NA	NA	NA	NA	NA	0	0	-0.0143157	0.318963	0	-0.333434	-0.326046	-0.33054	0	0	5.39559	5.64505	0	0	0	0	7.51689	0
chrII:624044-624172	CELE11	NA	NA	NA	NA	NA	NA	NA	NA	0.198287	0	-0.278027	0	0.286871	-0.280884	-0.274139	0.16476	5.44222	0	0	0	7.82633	0	0	9.02604	7.05073	0
chrII:763772-763968	CELE11	NA	NA	NA	NA	NA	NA	NA	NA	0.319981	0	NA	0	0	NA	NA	NA	3.53008	0	0	0	0	0	0	0	0	0
chrII:768593-768736	CELE11	NA	NA	NA	NA	NA	NA	NA	NA	NA	NA	0	NA	NA	0	0	0	0	0	0	0	0	0	0	0	0	0
chrII:947841-948024	CELE11	NA	NA	NA	NA	NA	NA	NA	NA	0.214794	0	0	0.225839	0.152241	0.307705	0.324345	0	3.77949	0	0	4.07373	2.5312	3.56516	3.774	0	0	0
chrII:978608-978816	CELE11	NA	NA	NA	NA	NA	NA	NA	NA	NA	NA	0	NA	NA	0	0	0	0	0	0	0	0	0	0	0	0	0
chrII:1186873-1187062	CELE11	NA	NA	NA	NA	NA	NA	NA	NA	NA	NA	NA	NA	NA	NA	NA	NA	0	0	0	0	0	0	0	0	0	0
chrII:1277225-1277424	CELE11	NA	NA	NA	NA	NA	NA	NA	NA	0.244486	0	0.31536	0	0.17909	0	0	0.30761	3.51023	0	3.26433	0	2.32871	0	0	3.13586	0	0
chrII:1621348-1621550	CELE11	NA	NA	NA	NA	NA	NA	NA	NA	0.227931	0	0	0	0.322319	0	0.400718	0	3.45836	0	0	0	4.78099	0	3.42076	0	0	0
chrII:1866866-1867021	CELE11	NA	NA	NA	NA	NA	NA	NA	NA	0	0.452395	0.317788	0	0	0	0	0	0	9.95875	4.18504	0	0	0	0	0	0	0
chrII:1876634-1876742	CELE11	NA	NA	NA	NA	NA	NA	NA	NA	NA	NA	NA	NA	NA	NA	NA	NA	0	0	0	0	0	0	0	0	0	0
chrII:2051383-2051520	CELE11	NA	NA	NA	NA	NA	NA	NA	NA	NA	NA	NA	NA	NA	NA	NA	NA	0	0	0	0	0	0	0	0	0	0
chrII:2212867-2213066	CELE11	NA	NA	NA	NA	NA	NA	NA	NA	0.227931	0	1.41801	0	0.322319	0.183772	-0.4138	-0.0792895	3.51023	0	27.2349	0	4.8527	5.6396	0	2.9109	4.54772	0
chrII:2213224-2213408	CELE11	NA	NA	1	NA	NA	0.999728	NA	NA	-0.0237718	0.142692	-0.559757	-0.272713	0.196868	-0.176277	0.783637	-1.52359	26.4566	31.982	29.9068	19.1799	33.5723	42.6781	95.0105	9.68395	65.5142	36.4891
chrII:2213925-2214105	CELE11	NA	NA	NA	NA	NA	NA	NA	NA	-0.0130212	-0.450754	0.573933	-0.453592	-0.478531	1.05735	0	0	7.72084	0	6.26635	0	0	14.0537	0	0	0	10.8555
chrII:2682259-2682496	CELE11	NA	NA	NA	NA	NA	NA	NA	NA	-0.22813	-0.485576	0	-0.489553	-0.124826	0.278525	0.296348	0	2.92196	0	0	0	4.0779	2.75626	2.91771	0	0	8.12281
chrII:2715224-2715382	CELE11	NA	NA	NA	NA	NA	NA	NA	NA	0.208984	0	0	0.378955	0	0.27293	0.282437	0.254854	4.41539	0	0	8.59184	0	4.12572	4.19061	3.66151	0	0
chrII:2715385-2715565	CELE11	NA	NA	NA	NA	NA	NA	NA	NA	0.443167	0.473203	-0.0146315	0	0	-0.302693	-0.294044	-0.299342	7.72084	8.58323	3.60699	0	0	0	0	0	5.0251	0
chrII:2832854-2833034	CELE11	NA	NA	NA	NA	NA	NA	NA	NA	-0.200898	-0.174458	0.591709	-0.416132	-0.524437	0.532761	0	0.566494	7.68426	8.2544	7.21399	3.77376	2.57316	6.2316	0	6.6815	0	16.1086
chrII:2833203-2833392	CELE11	NA	NA	NA	NA	NA	NA	NA	NA	-0.0166168	-0.491247	-0.0510283	0.179507	0.480656	0.424901	-0.00237128	-0.330621	7.35512	0	2.98476	11.1351	17.57	9.93539	3.65482	0	4.78707	10.3413
chrII:2833748-2833940	CELE11	NA	NA	NA	NA	NA	NA	NA	NA	-0.0161736	-0.70009	-0.591177	-0.438144	0.203432	-0.638959	-0.542463	-0.304968	10.8783	0	2.93837	3.53913	15.0861	2.44524	3.45237	6.26607	14.3571	15.107
chrII:2996447-2996540	CELE11	NA	NA	NA	NA	NA	NA	NA	NA	0.480554	0.284394	0.306153	0.274017	0.651307	0.261325	1.21444	0.595494	14.8667	8.26364	6.03303	7.97411	20.6498	5.02054	36.0399	13.3441	0	0
chrII:3182810-3182976	CELE11	NA	NA	NA	NA	NA	NA	NA	NA	0.321033	0	0	0	0	0	0	0.31229	4.20387	0	0	0	0	0	0	3.75552	0	0
chrII:3183009-3183189	CELE11	NA	NA	NA	NA	NA	NA	NA	NA	NA	NA	0	NA	NA	0	0.428516	0	0	0	0	0	0	0	3.83655	0	0	0
chrII:3254605-3254775	CELE11	NA	NA	NA	NA	NA	NA	NA	NA	0.226701	0.231522	NA	0	0	NA	NA	NA	4.10554	4.19453	0	0	0	0	0	0	0	0
chrII:3416272-3416385	CELE11	NA	NA	NA	NA	NA	NA	NA	NA	NA	NA	0	NA	NA	0	0	0.406893	0	0	0	0	0	0	0	5.50151	0	0
chrII:3639005-3639134	CELE11	NA	NA	NA	NA	NA	NA	NA	NA	0.228769	0	0	0.225648	0	0.274905	0	0.315785	5.40036	0	0	5.25424	0	3.63024	0	4.47831	0	0
chrII:3649351-3649512	CELE11	NA	NA	NA	NA	NA	NA	NA	NA	NA	NA	NA	NA	NA	NA	NA	NA	0	0	0	0	0	0	0	0	0	0
chrII:3656006-3656165	CELE11	NA	NA	NA	NA	NA	NA	NA	NA	0	0.334987	-0.303248	0	0	-0.0174875	-0.297865	-0.30361	0	4.85489	0	0	0	4.09993	0	0	5.68465	0
chrII:3673870-3674042	CELE11	NA	NA	NA	NA	NA	NA	NA	NA	0.243574	0	0	0	0.179471	0.359866	0	0	4.0198	0	0	0	2.69215	2.72793	0	0	0	0
chrII:3680970-3681170	CELE11	NA	NA	NA	NA	NA	NA	NA	NA	0	0.326125	0	0	0	0	0.428516	0	0	3.56848	0	0	0	0	3.4548	0	0	0
chrII:3738843-3739032	CELE11	NA	NA	NA	NA	NA	NA	NA	NA	-0.328891	-0.324434	NA	-0.327286	-0.344888	NA	NA	NA	0	0	0	0	0	0	0	0	0	5.17066
chrII:3756543-3756609	CELE11	NA	NA	NA	NA	NA	NA	NA	NA	NA	NA	0	NA	NA	0.570232	0	0.81636	0	0	0	0	0	16.8346	0	26.7393	0	0
chrII:3787978-3788095	CELE11	NA	NA	NA	NA	NA	NA	NA	NA	NA	NA	NA	NA	NA	NA	NA	NA	0	0	0	0	0	0	0	0	0	0
chrII:3890810-3890998	CELE11	NA	NA	NA	NA	NA	NA	NA	NA	-0.325255	-0.320798	NA	-0.323651	-0.341653	NA	NA	NA	0	0	0	0	0	0	0	0	0	5.03071
chrII:4019019-4019209	CELE11	NA	NA	NA	NA	NA	NA	NA	NA	NA	NA	NA	NA	NA	NA	NA	NA	0	0	0	0	0	0	0	0	0	0
chrII:4019782-4019936	CELE11	NA	NA	NA	NA	NA	NA	NA	NA	NA	NA	NA	NA	NA	NA	NA	NA	0	0	0	0	0	0	0	0	0	0
chrII:4108215-4108396	CELE11	NA	NA	NA	NA	NA	NA	NA	NA	0	0.252868	-0.290167	0	0.182426	-0.293185	-0.28607	-0.290446	0	4.26803	0	0	2.77362	0	0	0	5.22987	0
chrII:4109467-4109662	CELE11	NA	NA	NA	NA	NA	NA	NA	NA	-0.00495793	0.0156635	1.09409	0.00723142	0.197866	0.599564	1.16236	0	3.54809	3.96317	12.4487	3.82432	7.1287	5.75469	13.7415	0	0	4.85104
chrII:4136500-4136614	CELE11	NA	NA	NA	NA	NA	NA	NA	NA	NA	NA	NA	NA	NA	NA	NA	NA	0	0	0	0	0	0	0	0	0	0
chrII:4175825-4176047	CELE11	NA	NA	NA	NA	NA	NA	NA	NA	0.447753	0.251928	0.387999	0	0.169095	-0.135255	-0.131671	-0.133947	6.26669	3.21643	15.2584	0	2.08853	0	0	0	4.07867	0
chrII:4201135-4201302	CELE11	NA	NA	NA	NA	NA	NA	NA	NA	0.145173	-0.382687	-0.0663928	-0.394725	-0.325188	0.232511	-0.24204	0.388294	16.5972	4.6237	11.6583	4.4617	6.00951	18.4279	8.09953	22.1312	16.7453	17.1669
chrII:4216537-4216718	CELE11	NA	NA	NA	NA	NA	NA	NA	NA	0	0	-0.316034	0.614818	0.478306	-0.0471212	-0.655099	-0.0652459	0	0	3.58718	11.99	8.32085	7.20867	0	6.64479	10.2274	0
chrII:4278292-4278464	CELE11	NA	NA	NA	NA	NA	NA	NA	NA	-0.23456	-0.23242	0.299482	-0.00971596	-0.245616	0	0	0	0	0	3.27806	3.94827	0	0	0	0	0	5.67876
chrII:4359453-4359649	CELE11	NA	NA	NA	NA	NA	NA	NA	NA	-0.328891	-0.324434	0.391579	-0.327286	-0.344888	0	0	0	0	0	2.87871	0	0	0	0	0	0	4.98693
chrII:4380547-4380744	CELE11	NA	NA	NA	NA	NA	NA	NA	NA	0.345002	0.00399018	0.511535	-0.226772	-0.253093	0	0	0	10.6371	3.62255	5.72833	0	0	0	0	0	0	4.80204
chrII:4381658-4381842	CELE11	NA	NA	NA	NA	NA	NA	NA	NA	0.159175	-0.434976	-0.533012	-0.439247	-0.130367	-0.543515	-0.514234	-0.875766	11.3845	0	3.529	0	5.03504	3.54589	3.60166	0	15.2066	10.4499
chrII:4391605-4391783	CELE11	NA	NA	NA	NA	NA	NA	NA	NA	NA	NA	NA	NA	NA	NA	NA	NA	0	0	0	0	0	0	0	0	0	0
chrII:4496242-4496443	CELE11	NA	NA	1	NA	NA	NA	NA	NA	0.652233	-0.177752	0.934496	-0.190119	0.843978	0.590311	0.759977	0.933309	27.6727	7.39627	24.1578	7.42145	33.6326	16.7513	19.9304	24.1703	9.21476	14.5905
chrII:4507340-4507518	CELE11	NA	NA	NA	NA	NA	NA	NA	NA	-0.0147117	-0.222332	-0.326732	0.763208	-0.0104512	0.0153482	-0.235734	0.0655579	7.77012	4.00707	9.98366	27.8263	8.02392	16.2672	11.4812	17.0161	20.7976	10.8002
chrII:4560599-4560719	CELE11	NA	NA	NA	NA	NA	NA	NA	NA	NA	NA	0.294388	NA	NA	0.31891	0	0	0	0	4.68682	0	0	5.4214	0	0	0	0
chrII:4615529-4615634	CELE11	NA	NA	NA	NA	NA	NA	NA	NA	-0.190908	-0.385624	0.923467	-0.642389	-0.486923	0	0.341904	0.544894	13.1212	6.76665	22.2093	0	4.39379	0	6.55109	10.9845	0	27.5062
chrII:4618361-4618524	CELE11	NA	NA	NA	NA	NA	NA	NA	NA	0.209601	0.395008	0.290438	0	0	0.225651	0.74957	0.269286	4.2404	8.74713	3.98089	0	0	2.87763	12.1885	3.54988	0	0
chrII:4636804-4637019	CELE11	NA	NA	NA	NA	NA	NA	NA	NA	0	0.420879	0.209523	0.224285	0	-0.376332	-0.356874	-0.0524011	0	7.19243	5.64801	3.47021	0	0	0	2.69528	4.40665	0
chrII:4734290-4734434	CELE11	NA	NA	NA	NA	NA	NA	NA	NA	0	0	-0.0510972	0	0.261956	-0.334358	-0.0085946	-0.0337071	0	0	3.91107	0	3.21201	0	4.78907	4.32532	6.56439	0
chrII:4758432-4758539	CELE11	NA	NA	NA	NA	NA	NA	NA	NA	NA	NA	NA	NA	NA	NA	NA	NA	0	0	0	0	0	0	0	0	0	0
chrII:4773288-4773497	CELE11	NA	NA	NA	NA	NA	NA	NA	NA	0.319981	0	NA	0	0	NA	NA	NA	3.31155	0	0	0	0	0	0	0	0	0
chrII:4782334-4782517	CELE11	NA	NA	NA	NA	NA	NA	NA	NA	0	0	NA	0	0.261956	NA	NA	NA	0	0	0	0	2.5312	0	0	0	0	0
chrII:4804255-4804436	CELE11	0.98709	NA	1	NA	NA	0.909394	NA	NA	-0.028653	-0.621733	0.412023	-0.00931669	0.344542	1.15357	0.790629	0.210957	34.5347	16.0911	40.2188	35.2391	49.909	75.9501	56.1509	33.4711	35.4472	47.8865
chrII:4868111-4868190	CELE11	NA	NA	NA	NA	NA	NA	NA	NA	NA	NA	NA	NA	NA	NA	NA	NA	0	0	0	0	0	0	0	0	0	0
chrII:4924530-4924717	CELE11	NA	NA	NA	NA	NA	NA	NA	NA	0.786551	0.0259334	-0.313609	0.468665	0.5708	0.177879	-0.220861	0.722888	33.503	12.0789	9.50572	23.2147	25.8122	18.5509	11.0811	35.2603	20.2519	15.5088
chrII:4977741-4977936	CELE11	NA	NA	NA	NA	NA	NA	NA	NA	0	0	0	0	0.261956	0.313773	0.592939	0.310114	0	0	0	0	2.37623	3.34688	6.94246	3.19986	0	0
chrII:4985192-4985334	CELE11	NA	NA	NA	NA	NA	NA	NA	NA	0.79908	0.263011	-0.0340022	0	0.16744	-0.394601	-0.010527	-0.384531	19.4988	5.01584	4.5655	0	3.25693	0	4.85605	0	6.6562	0
chrII:4985406-4985585	CELE11	NA	NA	NA	NA	NA	NA	NA	NA	0	0	0	0	0.392283	0.410642	0	0	0	0	0	0	5.39189	3.64438	0	0	0	0
chrII:4985727-4985933	CELE11	NA	NA	NA	NA	NA	NA	NA	NA	-0.00591378	0.00590252	0.549804	0.20154	0.328913	0	0.842971	0.798282	3.35954	3.46505	5.47928	6.92086	8.99984	0	9.79241	9.08945	0	4.59325
chrII:5047892-5048067	CELE11	NA	NA	NA	NA	NA	NA	NA	NA	0.203077	0.00466266	0	-0.253022	-0.0866233	0	0.287934	0.258916	7.94019	4.07537	0	0	2.64626	0	3.78583	3.30784	0	5.40229
chrII:5105691-5105912	CELE11	NA	NA	NA	NA	NA	NA	NA	NA	0.175998	-0.215814	-0.343534	0.191031	-0.156842	-0.613362	-0.937434	-0.0988009	9.48712	3.23092	5.10905	9.82966	4.3718	2.9549	0	8.06996	12.6722	8.70824
chrII:5123998-5124123	CELE11	NA	NA	NA	NA	NA	NA	NA	NA	0	0	-0.581841	0	0.271038	-0.338872	-0.572986	-0.284998	0	0	0	0	4.00634	3.74549	0	4.97755	15.1085	0
chrII:5129466-5129646	CELE11	NA	NA	NA	NA	NA	NA	NA	NA	0.243574	0	NA	0	0.179471	NA	NA	NA	3.84213	0	0	0	2.57316	0	0	0	0	0
chrII:5192512-5192653	CELE11	NA	NA	NA	NA	NA	NA	NA	NA	0	0	0.413557	0.318963	0	0	0	0	0	0	4.59765	4.81022	0	0	0	0	0	0
chrII:5202726-5202887	CELE11	NA	NA	NA	NA	NA	NA	NA	NA	-0.168574	-0.119761	0.603478	-0.522745	-0.133683	-0.0479999	-0.433727	-0.51766	17.2936	18.8124	40.6247	8.84332	18.2141	20.8874	12.5125	11.3366	29.1166	29.7362
chrII:5238790-5238898	CELE11	NA	NA	NA	NA	NA	NA	NA	NA	NA	NA	0	NA	NA	0.410642	0	0	0	0	0	0	0	6.01825	0	0	0	0
chrII:5280650-5280775	CELE11	NA	NA	1	NA	NA	NA	NA	NA	-0.439151	-0.59947	0.361276	-0.441895	-0.372479	-0.319958	0.773086	0.19123	16.6629	11.3852	35.5897	16.2631	18.7918	15.6188	54.4431	28.7941	29.8814	45.7783
chrII:5482915-5483119	CELE11	NA	NA	NA	NA	NA	NA	NA	NA	-0.325255	-0.320798	-0.335247	-0.323651	-0.341653	-0.338399	-0.0156486	-0.335526	0	0	0	0	0	0	3.25028	0	4.64311	4.63807
chrII:5576644-5576775	CELE11	NA	NA	NA	NA	NA	NA	NA	NA	0	0	-0.444306	0.447599	0	-0.450092	-0.434691	-0.444906	0	0	0	11.3571	0	0	0	0	7.21089	0
chrII:5609508-5609608	CELE11	NA	NA	NA	NA	NA	NA	NA	NA	0.319981	0	0	0	0	0	0	0	6.8854	0	0	0	0	0	0	0	0	0
chrII:5706771-5706978	CELE11	NA	NA	NA	NA	NA	NA	NA	NA	0.631751	0.2592	-0.531329	0.64817	0.593119	-0.577559	-1.15363	-0.304929	10.062	3.44839	5.86524	10.4913	8.95657	5.42269	0	8.61313	17.8979	0
chrII:5727225-5727401	CELE11	NA	NA	NA	NA	NA	NA	NA	NA	NA	NA	NA	NA	NA	NA	NA	NA	0	0	0	0	0	0	0	0	0	0
chrII:5737170-5737312	CELE11	NA	NA	NA	NA	NA	NA	NA	NA	NA	NA	NA	NA	NA	NA	NA	NA	0	0	0	0	0	0	0	0	0	0
chrII:5750722-5750926	CELE11	NA	NA	NA	NA	NA	NA	NA	NA	-0.368954	0.0261754	-0.078844	0.149855	-0.240465	-0.760192	-0.223887	-1.08952	6.78464	14.8664	12.3205	17.9576	9.27816	3.19995	9.75083	0	18.3661	19.015
chrII:5864962-5865175	CELE11	0.98709	0.111083	1	0.159285	0.591233	0.683837	0.962053	0.966328	-0.0553376	-1.23437	-0.201973	-1.01274	-0.448078	-0.748341	0.140999	0.148416	351.953	141.314	238.076	168.689	261.219	159.95	306.746	309.145	366.899	493.006
chrII:5866389-5866601	CELE11	0.98709	0.941731	1	0.729781	0.739887	0.999728	0.965026	0.990194	-0.112105	-0.437048	0.0830619	-0.625599	-0.432138	-0.317158	-0.20813	0.043744	104.788	78.5688	88.1733	66.9468	79.8309	64.0322	69.7441	85.7993	109.335	154.889
chrII:5899824-5900027	CELE11	NA	NA	NA	NA	NA	NA	NA	NA	0	0.326125	0	0	0	0	0.699052	0.257378	0	3.516	0	0	0	0	9.79862	2.85382	0	0
chrII:5925491-5925680	CELE11	NA	NA	NA	NA	NA	NA	NA	NA	-0.0230044	0.276795	0.343979	-0.140804	0.274105	-0.345014	0.232543	-0.0416142	14.7102	24.2167	8.95429	11.8353	23.7059	0	7.30963	3.3009	5.00967	20.6826
chrII:5927614-5927837	CELE11	NA	NA	NA	NA	NA	NA	NA	NA	0.609852	0.260191	-0.308197	0.251076	0.324367	-0.401186	-0.928207	-0.311735	9.31374	3.46778	5.4463	3.34628	4.33277	4.21367	0	5.39889	12.3702	0
chrII:5936885-5936961	CELE11	NA	NA	NA	NA	NA	NA	NA	NA	-0.224929	0.488046	-0.358728	0.34087	-0.346097	0.829766	0.225881	0.150936	9.11749	46.5756	8.47878	37.2108	6.04859	56.2029	26.6901	23.851	24.1738	25.1069
chrII:6144796-6145024	CELE11	NA	NA	NA	NA	NA	NA	NA	NA	0.226459	0	-0.838556	0	0.3221	-0.362718	-0.825958	-0.282628	3.03679	0	0	0	4.23817	4.12167	0	5.28101	12.4695	0
chrII:6282458-6282553	CELE11	NA	NA	NA	NA	NA	NA	NA	NA	0.446889	0.253298	-0.639587	0.455932	0.15798	-0.0984252	-0.281922	-0.640444	14.488	7.47151	0	14.9231	4.85148	11.7492	7.23349	0	19.8299	0
chrII:6329359-6329568	CELE11	NA	NA	NA	NA	NA	NA	NA	NA	0	0	0.413557	0	0.392283	0	0	0	0	0	3.10889	0	4.62162	0	0	0	0	0
chrII:6341691-6341905	CELE11	NA	NA	NA	NA	NA	NA	NA	NA	-0.327604	-0.714112	-0.0795987	-0.00925874	-0.86554	0.770053	0.269136	0.638658	9.70362	3.33612	2.6377	16.5037	2.16624	13.5434	6.1982	11.2498	4.42715	22.5529
chrII:6411256-6411459	CELE11	NA	NA	NA	NA	NA	NA	NA	NA	0.249816	0.478574	1.29359	0.24787	0.166279	0.257804	0	0	3.44141	7.32376	18.3611	3.34829	2.28305	2.31339	0	0	0	0
chrII:6746339-6746442	CELE11	NA	NA	NA	NA	NA	NA	NA	NA	0.321033	0	NA	0	0	NA	NA	NA	6.75045	0	0	0	0	0	0	0	0	0
chrII:6823693-6823870	CELE11	NA	NA	NA	NA	NA	NA	NA	NA	-0.244523	-0.24023	0	-0.242973	0.359461	0.214998	0	0.263918	0	0	0	0	10.9049	2.6513	0	3.52344	0	5.34159
chrII:6906679-6906815	CELE11	NA	NA	NA	NA	NA	NA	NA	NA	0.499206	0.524328	0	0.271411	0.535178	0.547552	0	0	10.2005	10.9055	0	4.98578	10.7689	6.88951	0	0	0	0
chrII:7157142-7157277	CELE11	NA	NA	NA	NA	NA	NA	NA	NA	-0.247224	-0.245026	0.427762	-0.24643	-0.0674595	-0.642735	-0.577565	0.107327	0	0	26.2805	0	3.42457	4.82345	4.89931	17.7846	20.3744	6.9912
chrII:7232122-7232338	CELE11	NA	NA	NA	NA	NA	NA	NA	NA	-0.244507	0.205796	-0.342827	-0.242644	0.0887347	-0.346025	-0.33859	-0.0445075	0	6.61074	0	0	4.47254	0	0	2.68286	4.38635	4.38158
chrII:7270909-7271068	CELE11	NA	NA	NA	NA	NA	NA	NA	NA	NA	NA	0	NA	NA	0	0.428516	0	0	0	0	0	0	0	4.34009	0	0	0
chrII:7403066-7403211	CELE11	NA	NA	NA	NA	NA	NA	NA	NA	NA	NA	0.277684	NA	NA	0	0.292745	0	0	0	4.47168	0	0	0	4.75627	0	0	0
chrII:7592661-7592782	CELE11	NA	NA	NA	NA	NA	NA	NA	NA	0	0	NA	0	0.271038	NA	NA	NA	0	0	0	0	4.13769	0	0	0	0	0
chrII:7649312-7649444	CELE11	NA	NA	NA	NA	NA	NA	NA	NA	-0.242587	-0.213733	0.215915	0.189595	0.695077	0.416204	0.278276	-0.0584745	5.27855	5.84047	9.17271	15.9073	32.691	13.4128	10.4423	4.71558	7.15667	14.5356
chrII:7812979-7813181	CELE11	NA	NA	NA	NA	NA	NA	NA	NA	NA	NA	0	NA	NA	0	0	0	0	0	0	0	0	0	0	0	0	0
chrII:8180445-8180652	CELE11	NA	NA	NA	NA	NA	NA	NA	NA	NA	NA	0	NA	NA	0	0	0.406893	0	0	0	0	0	0	0	3.01525	0	0
chrII:8394589-8394762	CELE11	NA	NA	NA	NA	NA	NA	NA	NA	-0.325255	-0.320798	0.769473	-0.323651	-0.341653	0.252829	0	0	0	0	10.7634	0	0	2.71225	0	0	0	5.46439
chrII:8439349-8439570	CELE11	0.98709	NA	1	NA	NA	0.999728	NA	NA	0.165697	0.631576	0.307081	0.597113	0.378749	0.0858772	-0.0495399	0.74744	31.415	50.3405	34.3678	48.8487	39.1703	28.3585	24.1377	52.2582	33.9194	35.2603
chrII:8478940-8479117	CELE11	0.98709	NA	1	NA	NA	0.311953	0.0152497	NA	0.0730581	-0.168737	0.785417	0.827508	-0.146308	1.55776	2.16558	0.987375	82.491	65.4763	58.0161	157.131	68.0462	107.855	175.034	69.2049	36.719	103.977
chrII:8501992-8502130	CELE11	NA	NA	NA	NA	NA	NA	NA	NA	0.463163	0	-0.367174	0.460328	0.866278	-0.122068	0.206411	-0.0831618	10.0538	0	4.07989	9.82808	21.5089	8.11453	14.5829	8.70037	13.6955	0
chrII:8503117-8503297	CELE11	NA	NA	1	NA	NA	NA	NA	NA	-0.147195	-0.381444	0.179243	-0.411542	-0.0703073	0.140056	0.282616	-0.304201	19.2107	12.8748	23.8275	12.0563	21.4484	21.8757	26.5452	13.363	25.3592	32.3919
chrII:8528974-8529036	CELE11	NA	NA	NA	NA	NA	NA	NA	NA	0.241139	0	0.580677	0	0.186466	0	0	0	11.1436	0	18.0033	0	8.01267	0	0	0	0	0
chrII:8633930-8634040	CELE11	NA	NA	NA	NA	NA	NA	NA	NA	0	0.256241	NA	0	0.175103	NA	NA	NA	0	6.99804	0	0	4.19587	0	0	0	0	0
chrII:8726381-8726551	CELE11	NA	NA	NA	NA	NA	NA	NA	NA	-0.00688036	-0.00129151	0	-0.228075	-0.24505	0	0	0	4.10554	4.19453	0	0	0	0	0	0	0	5.74518
chrII:8755492-8755675	CELE11	NA	NA	NA	NA	NA	NA	NA	NA	-0.252535	-0.245482	0	0.528458	0.0759271	0.490611	0.308031	0	0	0	0	15.2104	5.06241	6.13	3.62123	0	0	5.16741
chrII:8799510-8799708	CELE11	NA	NA	NA	NA	NA	NA	NA	NA	NA	NA	NA	NA	NA	NA	NA	NA	0	0	0	0	0	0	0	0	0	0
chrII:8856119-8856298	CELE11	NA	NA	NA	NA	NA	NA	NA	NA	0.440261	0.450139	0.331078	0	0	0.268688	0	0	7.76374	7.96961	3.62703	0	0	2.62184	0	0	0	0
chrII:9014615-9014799	CELE11	NA	NA	NA	NA	NA	NA	NA	NA	-0.250242	-0.245649	0	0.207217	-0.0689364	0	0	0.265382	0	0	0	7.74388	2.72864	0	0	3.39012	0	5.13948
chrII:9077945-9078156	CELE11	NA	NA	NA	NA	NA	NA	NA	NA	-1.25811	-1.02095	-1.15912	-1.2431	-1.18368	-1.56671	-1.11611	0.0179395	3.28031	6.76665	3.07956	3.53569	4.76225	0	3.27554	20.284	26.7393	45.2967
chrII:9179821-9179914	CELE11	NA	NA	NA	NA	NA	NA	NA	NA	0	0	0.391579	0	0.271038	0	0	0	0	0	6.03303	0	5.3702	0	0	0	0	0
chrII:9227692-9227894	CELE11	NA	NA	NA	NA	NA	NA	NA	NA	NA	NA	NA	NA	NA	NA	NA	NA	0	0	0	0	0	0	0	0	0	0
chrII:9268621-9268830	CELE11	NA	NA	NA	NA	NA	NA	NA	NA	0	0.334987	NA	0	0	NA	NA	NA	0	3.69896	0	0	0	0	0	0	0	0
[truncated: 60,332 more rows]

## Sheet: concave peaks
coordinates	Repeat family	CONCAVE_PEAK_HPL2	CONCAVE_PEAK_LET418	CONCAVE_PEAK_LIN13	CONCAVE_PEAK_LIN61	CONCAVE_PEAK_MET2
chrI:10773-11032	CELE1	TRUE	FALSE	TRUE	TRUE	FALSE
chrI:14654-14917	CELE1	TRUE	TRUE	TRUE	TRUE	TRUE
chrI:29459-29722	CELE1	FALSE	FALSE	FALSE	FALSE	FALSE
chrI:42542-42825	CELE1	FALSE	FALSE	FALSE	FALSE	FALSE
chrI:83649-83975	CELE1	FALSE	FALSE	FALSE	FALSE	FALSE
chrI:126845-127164	CELE1	TRUE	FALSE	TRUE	FALSE	FALSE
chrI:131604-131770	CELE1	FALSE	FALSE	FALSE	TRUE	FALSE
chrI:131812-132053	CELE1	FALSE	FALSE	FALSE	TRUE	FALSE
chrI:134700-135019	CELE1	FALSE	FALSE	TRUE	FALSE	TRUE
chrI:259705-260043	CELE1	FALSE	FALSE	FALSE	FALSE	FALSE
chrI:290669-290972	CELE1	TRUE	FALSE	TRUE	FALSE	FALSE
chrI:294566-294902	CELE1	FALSE	FALSE	FALSE	FALSE	FALSE
chrI:298053-298143	CELE1	TRUE	FALSE	FALSE	FALSE	FALSE
chrI:309819-310130	CELE1	TRUE	FALSE	TRUE	TRUE	TRUE
chrI:333714-333776	CELE1	FALSE	FALSE	TRUE	TRUE	FALSE
chrI:342949-343040	CELE1	FALSE	FALSE	TRUE	FALSE	FALSE
chrI:352171-352550	CELE1	FALSE	FALSE	TRUE	FALSE	FALSE
chrI:385928-386010	CELE1	FALSE	FALSE	FALSE	FALSE	FALSE
chrI:389844-390182	CELE1	FALSE	FALSE	TRUE	FALSE	FALSE
chrI:397552-397701	CELE1	TRUE	TRUE	TRUE	TRUE	TRUE
chrI:404266-404599	CELE1	TRUE	FALSE	TRUE	FALSE	FALSE
chrI:411596-411920	CELE1	FALSE	FALSE	FALSE	FALSE	FALSE
chrI:447332-447637	CELE1	TRUE	FALSE	TRUE	FALSE	FALSE
chrI:459220-459541	CELE1	FALSE	FALSE	TRUE	FALSE	FALSE
chrI:460121-460224	CELE1	FALSE	FALSE	FALSE	FALSE	FALSE
chrI:497119-497419	CELE1	FALSE	FALSE	TRUE	TRUE	TRUE
chrI:613966-614027	CELE1	TRUE	FALSE	FALSE	FALSE	FALSE
chrI:614029-614363	CELE1	TRUE	TRUE	TRUE	TRUE	TRUE
chrI:615408-615660	CELE1	TRUE	FALSE	TRUE	FALSE	FALSE
chrI:616694-616751	CELE1	FALSE	FALSE	TRUE	TRUE	FALSE
chrI:622556-622617	CELE1	TRUE	FALSE	TRUE	FALSE	FALSE
chrI:655147-655497	CELE1	TRUE	FALSE	TRUE	TRUE	FALSE
chrI:658006-658135	CELE1	FALSE	FALSE	TRUE	FALSE	FALSE
chrI:679481-679816	CELE1	FALSE	FALSE	FALSE	FALSE	FALSE
chrI:704674-704969	CELE1	FALSE	FALSE	TRUE	FALSE	FALSE
chrI:706987-707300	CELE1	TRUE	FALSE	TRUE	FALSE	FALSE
chrI:756369-756582	CELE1	FALSE	FALSE	TRUE	FALSE	FALSE
chrI:903769-904039	CELE1	TRUE	FALSE	TRUE	FALSE	FALSE
chrI:931250-931303	CELE1	FALSE	FALSE	FALSE	FALSE	FALSE
chrI:1012043-1012186	CELE1	FALSE	FALSE	TRUE	TRUE	TRUE
chrI:1024483-1024533	CELE1	FALSE	FALSE	TRUE	FALSE	FALSE
chrI:1051590-1051901	CELE1	TRUE	TRUE	FALSE	TRUE	FALSE
chrI:1056516-1056860	CELE1	FALSE	FALSE	TRUE	TRUE	TRUE
chrI:1110741-1110834	CELE1	FALSE	FALSE	FALSE	FALSE	FALSE
chrI:1140309-1140560	CELE1	FALSE	FALSE	FALSE	FALSE	FALSE
chrI:1147614-1147829	CELE1	TRUE	FALSE	FALSE	TRUE	FALSE
chrI:1179565-1179846	CELE1	TRUE	FALSE	TRUE	TRUE	TRUE
chrI:1205196-1205481	CELE1	TRUE	FALSE	FALSE	FALSE	FALSE
chrI:1205647-1205812	CELE1	TRUE	FALSE	FALSE	FALSE	FALSE
chrI:1221358-1221631	CELE1	FALSE	FALSE	TRUE	FALSE	FALSE
chrI:1231959-1232238	CELE1	TRUE	FALSE	TRUE	TRUE	FALSE
chrI:1375099-1375410	CELE1	TRUE	FALSE	TRUE	TRUE	TRUE
chrI:1379772-1379981	CELE1	FALSE	FALSE	FALSE	FALSE	FALSE
chrI:1400933-1401081	CELE1	FALSE	FALSE	FALSE	FALSE	FALSE
chrI:1401141-1401272	CELE1	FALSE	FALSE	FALSE	FALSE	FALSE
chrI:1401659-1402013	CELE1	TRUE	FALSE	TRUE	FALSE	TRUE
chrI:1407688-1407973	CELE1	TRUE	FALSE	TRUE	TRUE	TRUE
chrI:1437893-1438166	CELE1	FALSE	FALSE	TRUE	TRUE	FALSE
chrI:1440006-1440143	CELE1	FALSE	FALSE	TRUE	TRUE	FALSE
chrI:1441882-1442037	CELE1	TRUE	FALSE	FALSE	FALSE	FALSE
chrI:1526750-1526948	CELE1	FALSE	FALSE	TRUE	FALSE	FALSE
chrI:1558070-1558416	CELE1	TRUE	FALSE	TRUE	FALSE	FALSE
chrI:1573291-1573578	CELE1	TRUE	FALSE	TRUE	TRUE	TRUE
chrI:1583858-1584202	CELE1	TRUE	FALSE	FALSE	FALSE	FALSE
chrI:1685507-1685644	CELE1	FALSE	FALSE	TRUE	FALSE	FALSE
chrI:1711147-1711325	CELE1	FALSE	FALSE	TRUE	FALSE	FALSE
chrI:1845629-1845941	CELE1	FALSE	FALSE	TRUE	FALSE	TRUE
chrI:1863357-1863677	CELE1	TRUE	FALSE	TRUE	TRUE	TRUE
chrI:1878701-1878820	CELE1	FALSE	FALSE	TRUE	TRUE	FALSE
chrI:1882328-1882638	CELE1	TRUE	FALSE	FALSE	FALSE	FALSE
chrI:1962674-1962971	CELE1	FALSE	FALSE	TRUE	FALSE	FALSE
chrI:1989019-1989260	CELE1	TRUE	FALSE	TRUE	TRUE	FALSE
chrI:2001277-2001434	CELE1	TRUE	FALSE	TRUE	TRUE	FALSE
chrI:2009105-2009499	CELE1	TRUE	FALSE	TRUE	TRUE	TRUE
chrI:2014249-2014539	CELE1	FALSE	FALSE	TRUE	FALSE	FALSE
chrI:2136892-2137003	CELE1	FALSE	FALSE	FALSE	FALSE	FALSE
chrI:2373500-2373864	CELE1	FALSE	FALSE	TRUE	TRUE	TRUE
chrI:2375651-2376180	CELE1	TRUE	FALSE	TRUE	TRUE	TRUE
chrI:2386716-2386982	CELE1	FALSE	FALSE	TRUE	TRUE	TRUE
chrI:2387343-2387679	CELE1	TRUE	FALSE	TRUE	TRUE	TRUE
chrI:2393899-2394124	CELE1	FALSE	FALSE	FALSE	FALSE	FALSE
chrI:2395150-2395436	CELE1	TRUE	FALSE	FALSE	FALSE	FALSE
chrI:2412142-2412285	CELE1	FALSE	FALSE	FALSE	FALSE	FALSE
chrI:2413772-2414116	CELE1	TRUE	FALSE	TRUE	FALSE	FALSE
chrI:2417616-2417956	CELE1	TRUE	TRUE	TRUE	TRUE	TRUE
chrI:2436220-2436349	CELE1	TRUE	TRUE	TRUE	TRUE	TRUE
chrI:2452187-2452364	CELE1	FALSE	FALSE	FALSE	FALSE	FALSE
chrI:2476881-2477137	CELE1	FALSE	FALSE	FALSE	FALSE	FALSE
chrI:2578228-2578579	CELE1	FALSE	FALSE	TRUE	TRUE	TRUE
chrI:2579630-2579962	CELE1	TRUE	FALSE	TRUE	FALSE	FALSE
chrI:2585101-2585244	CELE1	TRUE	FALSE	TRUE	TRUE	TRUE
chrI:2585506-2585714	CELE1	TRUE	TRUE	TRUE	TRUE	TRUE
chrI:2607694-2608043	CELE1	FALSE	FALSE	FALSE	FALSE	FALSE
chrI:2643869-2643994	CELE1	FALSE	FALSE	TRUE	FALSE	FALSE
chrI:2688423-2688722	CELE1	TRUE	FALSE	TRUE	TRUE	FALSE
chrI:2769357-2769676	CELE1	FALSE	FALSE	TRUE	FALSE	FALSE
chrI:2823961-2824098	CELE1	FALSE	FALSE	FALSE	FALSE	FALSE
chrI:2832430-2832728	CELE1	TRUE	TRUE	TRUE	TRUE	TRUE
chrI:2868555-2868754	CELE1	TRUE	TRUE	TRUE	TRUE	TRUE
chrI:2949153-2949491	CELE1	FALSE	FALSE	TRUE	TRUE	FALSE
chrI:2998586-2998894	CELE1	TRUE	FALSE	TRUE	TRUE	TRUE
chrI:3003121-3003412	CELE1	TRUE	FALSE	TRUE	TRUE	FALSE
chrI:3027038-3027379	CELE1	FALSE	FALSE	TRUE	FALSE	FALSE
chrI:3053048-3053213	CELE1	TRUE	FALSE	TRUE	FALSE	FALSE
chrI:3060968-3061126	CELE1	FALSE	FALSE	TRUE	TRUE	TRUE
chrI:3079788-3080036	CELE1	TRUE	FALSE	TRUE	TRUE	TRUE
chrI:3118009-3118358	CELE1	TRUE	FALSE	FALSE	FALSE	FALSE
chrI:3136492-3136832	CELE1	TRUE	FALSE	TRUE	FALSE	FALSE
chrI:3141279-3141632	CELE1	FALSE	FALSE	TRUE	FALSE	TRUE
chrI:3142469-3142628	CELE1	TRUE	FALSE	TRUE	FALSE	FALSE
chrI:3143836-3144177	CELE1	TRUE	FALSE	TRUE	TRUE	TRUE
chrI:3149600-3149765	CELE1	FALSE	FALSE	TRUE	TRUE	TRUE
chrI:3166986-3167176	CELE1	TRUE	FALSE	FALSE	FALSE	FALSE
chrI:3184781-3184845	CELE1	FALSE	FALSE	TRUE	FALSE	FALSE
chrI:3191437-3191599	CELE1	TRUE	FALSE	TRUE	TRUE	FALSE
chrI:3195322-3195740	CELE1	TRUE	FALSE	TRUE	TRUE	FALSE
chrI:3206985-3207295	CELE1	FALSE	FALSE	FALSE	FALSE	FALSE
chrI:3208358-3208680	CELE1	TRUE	FALSE	TRUE	FALSE	FALSE
chrI:3255101-3255395	CELE1	TRUE	FALSE	TRUE	FALSE	FALSE
chrI:3276932-3277276	CELE1	FALSE	FALSE	FALSE	FALSE	FALSE
chrI:3286608-3286946	CELE1	FALSE	FALSE	TRUE	FALSE	FALSE
chrI:3304331-3304639	CELE1	FALSE	FALSE	FALSE	FALSE	FALSE
chrI:3309893-3309955	CELE1	TRUE	FALSE	TRUE	TRUE	TRUE
chrI:3316098-3316410	CELE1	TRUE	FALSE	TRUE	FALSE	FALSE
chrI:3317226-3317573	CELE1	FALSE	FALSE	TRUE	FALSE	FALSE
chrI:3336844-3337217	CELE1	TRUE	FALSE	FALSE	FALSE	FALSE
chrI:3350879-3351254	CELE1	FALSE	FALSE	TRUE	FALSE	FALSE
chrI:3374303-3374513	CELE1	TRUE	FALSE	TRUE	TRUE	TRUE
chrI:3397199-3397244	CELE1	FALSE	FALSE	TRUE	FALSE	FALSE
chrI:3408585-3408901	CELE1	TRUE	FALSE	TRUE	FALSE	TRUE
chrI:3417021-3417344	CELE1	TRUE	FALSE	TRUE	TRUE	TRUE
chrI:3429716-3429779	CELE1	FALSE	FALSE	TRUE	FALSE	FALSE
chrI:3429856-3429953	CELE1	FALSE	FALSE	TRUE	FALSE	FALSE
chrI:3431166-3431445	CELE1	FALSE	FALSE	TRUE	FALSE	FALSE
chrI:3431771-3431828	CELE1	FALSE	FALSE	TRUE	FALSE	FALSE
chrI:3434386-3434676	CELE1	FALSE	FALSE	FALSE	FALSE	FALSE
chrI:3448325-3448647	CELE1	FALSE	FALSE	FALSE	FALSE	FALSE
chrI:3484660-3485061	CELE1	FALSE	FALSE	TRUE	FALSE	TRUE
chrI:3507498-3507813	CELE1	TRUE	FALSE	TRUE	TRUE	TRUE
chrI:3537170-3537241	CELE1	FALSE	FALSE	FALSE	FALSE	FALSE
chrI:3540177-3540571	CELE1	FALSE	FALSE	TRUE	FALSE	TRUE
chrI:3560310-3560625	CELE1	TRUE	FALSE	TRUE	FALSE	FALSE
chrI:3562214-3562499	CELE1	TRUE	FALSE	TRUE	TRUE	FALSE
chrI:3563061-3563110	CELE1	TRUE	TRUE	TRUE	TRUE	TRUE
chrI:3610641-3611313	CELE1	TRUE	FALSE	TRUE	TRUE	TRUE
chrI:3614472-3614618	CELE1	FALSE	FALSE	TRUE	FALSE	FALSE
chrI:3619891-3620220	CELE1	FALSE	FALSE	TRUE	FALSE	FALSE
chrI:3678410-3678593	CELE1	FALSE	FALSE	FALSE	FALSE	FALSE
chrI:3681453-3681741	CELE1	TRUE	FALSE	TRUE	TRUE	FALSE
chrI:3686094-3686473	CELE1	FALSE	FALSE	TRUE	FALSE	FALSE
chrI:3706831-3707158	CELE1	FALSE	FALSE	FALSE	FALSE	FALSE
chrI:3722110-3722436	CELE1	TRUE	TRUE	TRUE	TRUE	TRUE
chrI:3748941-3749124	CELE1	FALSE	FALSE	FALSE	FALSE	FALSE
chrI:3794069-3794390	CELE1	TRUE	FALSE	TRUE	FALSE	TRUE
chrI:3834779-3835082	CELE1	TRUE	FALSE	TRUE	TRUE	TRUE
chrI:3855055-3855350	CELE1	TRUE	FALSE	TRUE	TRUE	TRUE
chrI:3858830-3859089	CELE1	TRUE	TRUE	TRUE	TRUE	TRUE
chrI:3870174-3870250	CELE1	FALSE	FALSE	FALSE	FALSE	FALSE
chrI:3870289-3870582	CELE1	FALSE	FALSE	TRUE	TRUE	TRUE
chrI:4207631-4207994	CELE1	FALSE	FALSE	FALSE	FALSE	FALSE
chrI:4277537-4277794	CELE1	FALSE	FALSE	FALSE	FALSE	FALSE
chrI:4376972-4377193	CELE1	FALSE	FALSE	FALSE	FALSE	FALSE
chrI:4443037-4443338	CELE1	TRUE	FALSE	TRUE	FALSE	FALSE
chrI:4734183-4734536	CELE1	FALSE	FALSE	TRUE	FALSE	TRUE
chrI:4792774-4792906	CELE1	FALSE	FALSE	FALSE	FALSE	FALSE
chrI:4833055-4833435	CELE1	FALSE	FALSE	FALSE	TRUE	FALSE
chrI:4895648-4895791	CELE1	FALSE	FALSE	TRUE	TRUE	TRUE
chrI:4919030-4919372	CELE1	TRUE	FALSE	FALSE	FALSE	FALSE
chrI:4937432-4937546	CELE1	FALSE	FALSE	FALSE	FALSE	FALSE
chrI:5080470-5080769	CELE1	FALSE	FALSE	FALSE	FALSE	FALSE
chrI:5186295-5186669	CELE1	TRUE	FALSE	TRUE	FALSE	TRUE
chrI:5621323-5621466	CELE1	TRUE	TRUE	TRUE	TRUE	TRUE
chrI:5621797-5622005	CELE1	FALSE	TRUE	TRUE	TRUE	TRUE
chrI:5746184-5746348	CELE1	FALSE	TRUE	TRUE	TRUE	FALSE
chrI:5918722-5918883	CELE1	FALSE	FALSE	TRUE	FALSE	FALSE
chrI:6321226-6321376	CELE1	FALSE	FALSE	TRUE	FALSE	FALSE
chrI:6805193-6805356	CELE1	FALSE	FALSE	FALSE	FALSE	FALSE
chrI:6971463-6971616	CELE1	FALSE	FALSE	TRUE	FALSE	FALSE
chrI:7239395-7239733	CELE1	TRUE	FALSE	TRUE	TRUE	TRUE
chrI:7527497-7527851	CELE1	FALSE	FALSE	TRUE	FALSE	FALSE
chrI:7588537-7588678	CELE1	TRUE	TRUE	TRUE	FALSE	TRUE
chrI:7729926-7730201	CELE1	FALSE	FALSE	FALSE	FALSE	FALSE
chrI:7970104-7970434	CELE1	TRUE	FALSE	TRUE	FALSE	TRUE
chrI:8086600-8086923	CELE1	FALSE	FALSE	FALSE	FALSE	FALSE
chrI:8213293-8213430	CELE1	FALSE	FALSE	TRUE	TRUE	FALSE
chrI:8769487-8769663	CELE1	FALSE	FALSE	FALSE	FALSE	FALSE
chrI:9241172-9241459	CELE1	FALSE	FALSE	FALSE	TRUE	FALSE
chrI:9903551-9903834	CELE1	FALSE	FALSE	TRUE	FALSE	FALSE
chrI:9970620-9970863	CELE1	FALSE	FALSE	TRUE	FALSE	FALSE
chrI:10128125-10128406	CELE1	FALSE	FALSE	FALSE	FALSE	FALSE
chrI:10487316-10487446	CELE1	FALSE	FALSE	TRUE	FALSE	TRUE
chrI:10635414-10635517	CELE1	FALSE	FALSE	FALSE	FALSE	FALSE
chrI:10929536-10929887	CELE1	TRUE	FALSE	TRUE	FALSE	FALSE
chrI:11067846-11068191	CELE1	TRUE	FALSE	FALSE	TRUE	FALSE
chrI:11083044-11083326	CELE1	TRUE	FALSE	TRUE	TRUE	TRUE
chrI:11169087-11169130	CELE1	TRUE	FALSE	FALSE	FALSE	FALSE
chrI:11448532-11448691	CELE1	FALSE	FALSE	FALSE	FALSE	FALSE
chrI:11930469-11930610	CELE1	TRUE	TRUE	TRUE	TRUE	TRUE
chrI:12009966-12010291	CELE1	FALSE	TRUE	TRUE	TRUE	TRUE
chrI:12261214-12261580	CELE1	FALSE	FALSE	FALSE	FALSE	FALSE
chrI:12270553-12270922	CELE1	FALSE	FALSE	FALSE	FALSE	FALSE
chrI:12852453-12852630	CELE1	TRUE	TRUE	TRUE	TRUE	TRUE
chrI:12863804-12864106	CELE1	TRUE	FALSE	TRUE	FALSE	TRUE
chrI:12882660-12882728	CELE1	FALSE	FALSE	TRUE	TRUE	FALSE
chrI:12882800-12883118	CELE1	FALSE	FALSE	TRUE	TRUE	TRUE
chrI:12924194-12924545	CELE1	TRUE	FALSE	TRUE	TRUE	TRUE
chrI:12974377-12974720	CELE1	TRUE	FALSE	TRUE	TRUE	FALSE
chrI:13336338-13336688	CELE1	TRUE	FALSE	TRUE	FALSE	FALSE
chrI:13530831-13531184	CELE1	TRUE	FALSE	TRUE	FALSE	FALSE
chrI:14162996-14163246	CELE1	TRUE	TRUE	TRUE	TRUE	TRUE
chrI:14350513-14350650	CELE1	FALSE	FALSE	FALSE	FALSE	TRUE
chrI:14403693-14403849	CELE1	TRUE	TRUE	FALSE	TRUE	TRUE
chrI:14479546-14479635	CELE1	FALSE	FALSE	FALSE	TRUE	FALSE
chrI:14501597-14501645	CELE1	FALSE	FALSE	TRUE	TRUE	FALSE
chrI:14600301-14600349	CELE1	FALSE	FALSE	TRUE	FALSE	FALSE
chrI:14661979-14662074	CELE1	TRUE	TRUE	TRUE	TRUE	TRUE
chrI:14734604-14734786	CELE1	TRUE	FALSE	TRUE	TRUE	TRUE
chrI:15018227-15018410	CELE1	TRUE	FALSE	TRUE	FALSE	FALSE
chrI:15035509-15035867	CELE1	TRUE	FALSE	TRUE	TRUE	TRUE
chrI:15042277-15042449	CELE1	TRUE	TRUE	TRUE	TRUE	TRUE
chrI:10339-10432	CELE1	FALSE	FALSE	TRUE	TRUE	FALSE
chrI:10442-10603	CELE1	FALSE	FALSE	FALSE	TRUE	FALSE
chrI:30745-31105	CELE1	FALSE	FALSE	FALSE	FALSE	FALSE
chrI:70485-70802	CELE1	FALSE	FALSE	TRUE	FALSE	FALSE
chrI:70898-71171	CELE1	FALSE	FALSE	TRUE	FALSE	FALSE
chrI:100693-100823	CELE1	FALSE	FALSE	FALSE	FALSE	FALSE
chrI:115082-115412	CELE1	TRUE	TRUE	TRUE	TRUE	TRUE
chrI:192308-192573	CELE1	TRUE	FALSE	FALSE	FALSE	FALSE
chrI:203734-204076	CELE1	FALSE	FALSE	FALSE	FALSE	FALSE
chrI:205636-205778	CELE1	TRUE	FALSE	TRUE	TRUE	FALSE
chrI:205935-206089	CELE1	TRUE	FALSE	TRUE	TRUE	FALSE
chrI:247804-248082	CELE1	FALSE	FALSE	TRUE	FALSE	FALSE
chrI:250418-250696	CELE1	FALSE	FALSE	TRUE	TRUE	TRUE
chrI:289931-290268	CELE1	TRUE	FALSE	FALSE	FALSE	FALSE
chrI:318262-318518	CELE1	TRUE	TRUE	TRUE	TRUE	TRUE
chrI:333414-333697	CELE1	TRUE	FALSE	TRUE	TRUE	FALSE
chrI:342236-342400	CELE1	FALSE	FALSE	TRUE	TRUE	FALSE
chrI:344476-344785	CELE1	TRUE	FALSE	TRUE	FALSE	FALSE
chrI:359530-359672	CELE1	FALSE	FALSE	TRUE	FALSE	FALSE
chrI:367478-367605	CELE1	FALSE	FALSE	TRUE	TRUE	FALSE
chrI:396163-396523	CELE1	TRUE	FALSE	TRUE	FALSE	FALSE
chrI:408996-409357	CELE1	TRUE	FALSE	TRUE	FALSE	FALSE
chrI:471509-471904	CELE1	FALSE	FALSE	FALSE	FALSE	FALSE
chrI:554456-554850	CELE1	FALSE	FALSE	FALSE	FALSE	FALSE
chrI:617037-617088	CELE1	FALSE	FALSE	TRUE	TRUE	FALSE
chrI:622623-622765	CELE1	TRUE	FALSE	TRUE	TRUE	FALSE
chrI:652631-652777	CELE1	TRUE	FALSE	FALSE	FALSE	FALSE
chrI:653218-653270	CELE1	FALSE	FALSE	TRUE	FALSE	TRUE
chrI:659684-659977	CELE1	TRUE	FALSE	TRUE	TRUE	TRUE
chrI:663982-664095	CELE1	TRUE	FALSE	TRUE	FALSE	FALSE
chrI:681818-682130	CELE1	FALSE	FALSE	TRUE	TRUE	FALSE
chrI:743608-743984	CELE1	FALSE	FALSE	FALSE	FALSE	FALSE
chrI:947731-947886	CELE1	FALSE	FALSE	TRUE	FALSE	FALSE
chrI:947937-948055	CELE1	FALSE	FALSE	TRUE	FALSE	FALSE
chrI:1025115-1025167	CELE1	TRUE	FALSE	TRUE	FALSE	FALSE
chrI:1110846-1110959	CELE1	FALSE	FALSE	FALSE	FALSE	FALSE
chrI:1140643-1140798	CELE1	FALSE	FALSE	FALSE	TRUE	FALSE
chrI:1168226-1168663	CELE1	TRUE	FALSE	TRUE	TRUE	TRUE
chrI:1177151-1177422	CELE1	FALSE	FALSE	TRUE	TRUE	FALSE
chrI:1235952-1236067	CELE1	FALSE	FALSE	FALSE	FALSE	FALSE
chrI:1239833-1240128	CELE1	TRUE	FALSE	TRUE	FALSE	FALSE
chrI:1241267-1241388	CELE1	FALSE	FALSE	FALSE	FALSE	FALSE
chrI:1242595-1242720	CELE1	FALSE	FALSE	FALSE	FALSE	FALSE
chrI:1370310-1370604	CELE1	TRUE	FALSE	FALSE	TRUE	FALSE
chrI:1380102-1380255	CELE1	TRUE	FALSE	FALSE	FALSE	FALSE
chrI:1400482-1400671	CELE1	FALSE	FALSE	TRUE	TRUE	FALSE
chrI:1440197-1440351	CELE1	FALSE	FALSE	TRUE	TRUE	FALSE
chrI:1526266-1526474	CELE1	FALSE	FALSE	FALSE	FALSE	FALSE
chrI:1541888-1542226	CELE1	TRUE	FALSE	TRUE	TRUE	TRUE
chrI:1545852-1546307	CELE1	TRUE	FALSE	TRUE	TRUE	TRUE
chrI:1553955-1554308	CELE1	FALSE	FALSE	TRUE	FALSE	FALSE
chrI:1572494-1572604	CELE1	FALSE	FALSE	FALSE	FALSE	FALSE
chrI:1635026-1635334	CELE1	FALSE	FALSE	TRUE	FALSE	FALSE
chrI:1686134-1686210	CELE1	TRUE	TRUE	TRUE	TRUE	TRUE
chrI:1686716-1687084	CELE1	TRUE	FALSE	TRUE	FALSE	FALSE
chrI:1718423-1718789	CELE1	TRUE	FALSE	TRUE	FALSE	FALSE
chrI:1821088-1821317	CELE1	FALSE	FALSE	TRUE	FALSE	FALSE
chrI:1847218-1847588	CELE1	FALSE	FALSE	TRUE	FALSE	FALSE
chrI:1878256-1878545	CELE1	TRUE	FALSE	TRUE	TRUE	FALSE
chrI:1932592-1932944	CELE1	FALSE	FALSE	TRUE	FALSE	FALSE
chrI:1952588-1952722	CELE1	FALSE	FALSE	FALSE	FALSE	FALSE
chrI:1968035-1968216	CELE1	TRUE	FALSE	FALSE	FALSE	FALSE
chrI:2008037-2008424	CELE1	FALSE	FALSE	TRUE	TRUE	TRUE
chrI:2033825-2034121	CELE1	TRUE	FALSE	TRUE	TRUE	TRUE
chrI:2082383-2082767	CELE1	TRUE	FALSE	TRUE	TRUE	TRUE
chrI:2085894-2086243	CELE1	TRUE	TRUE	TRUE	TRUE	TRUE
chrI:2087423-2087738	CELE1	FALSE	FALSE	FALSE	FALSE	FALSE
chrI:2124256-2124792	CELE1	TRUE	FALSE	TRUE	TRUE	TRUE
chrI:2127184-2127724	CELE1	TRUE	FALSE	TRUE	TRUE	TRUE
chrI:2127755-2127802	CELE1	TRUE	FALSE	FALSE	FALSE	TRUE
chrI:2188477-2188615	CELE1	FALSE	FALSE	FALSE	FALSE	FALSE
chrI:2285287-2285410	CELE1	FALSE	FALSE	FALSE	FALSE	FALSE
chrI:2323060-2323408	CELE1	TRUE	TRUE	TRUE	TRUE	TRUE
chrI:2324789-2325109	CELE1	FALSE	FALSE	TRUE	FALSE	FALSE
chrI:2360837-2360960	CELE1	FALSE	FALSE	TRUE	FALSE	FALSE
chrI:2361092-2361367	CELE1	FALSE	FALSE	TRUE	FALSE	FALSE
chrI:2373977-2374041	CELE1	TRUE	FALSE	TRUE	TRUE	TRUE
chrI:2378072-2378385	CELE1	TRUE	FALSE	TRUE	TRUE	FALSE
chrI:2395915-2396068	CELE1	FALSE	FALSE	FALSE	FALSE	FALSE
chrI:2415283-2415628	CELE1	FALSE	FALSE	TRUE	FALSE	FALSE
chrI:2435846-2436001	CELE1	TRUE	TRUE	TRUE	TRUE	TRUE
chrI:2452752-2452914	CELE1	FALSE	FALSE	TRUE	FALSE	FALSE
chrI:2453367-2453661	CELE1	FALSE	FALSE	TRUE	FALSE	FALSE
chrI:2465529-2465855	CELE1	FALSE	FALSE	TRUE	FALSE	FALSE
chrI:2477795-2478073	CELE1	TRUE	FALSE	TRUE	TRUE	FALSE
chrI:2478864-2479022	CELE1	FALSE	FALSE	TRUE	TRUE	FALSE
chrI:2512174-2512505	CELE1	FALSE	FALSE	FALSE	FALSE	FALSE
chrI:2580539-2580890	CELE1	TRUE	TRUE	TRUE	TRUE	TRUE
chrI:2588019-2588240	CELE1	TRUE	FALSE	TRUE	TRUE	TRUE
chrI:2617369-2617433	CELE1	FALSE	FALSE	FALSE	FALSE	FALSE
chrI:2619573-2620007	CELE1	FALSE	FALSE	TRUE	FALSE	TRUE
chrI:2645394-2645476	CELE1	FALSE	FALSE	FALSE	FALSE	FALSE
chrI:2711437-2711509	CELE1	FALSE	TRUE	TRUE	FALSE	FALSE
chrI:2715172-2715496	CELE1	FALSE	FALSE	TRUE	FALSE	FALSE
chrI:2734003-2734461	CELE1	FALSE	FALSE	TRUE	FALSE	FALSE
chrI:2759996-2760315	CELE1	TRUE	FALSE	TRUE	TRUE	TRUE
chrI:2761671-2761785	CELE1	FALSE	FALSE	TRUE	TRUE	FALSE
chrI:2764410-2764752	CELE1	FALSE	FALSE	FALSE	FALSE	FALSE
chrI:2764781-2764982	CELE1	FALSE	FALSE	FALSE	FALSE	FALSE
chrI:2765020-2765096	CELE1	FALSE	FALSE	FALSE	FALSE	FALSE
chrI:2767838-2768129	CELE1	FALSE	FALSE	FALSE	FALSE	FALSE
chrI:2805652-2805805	CELE1	FALSE	FALSE	FALSE	FALSE	FALSE
chrI:2859080-2859364	CELE1	FALSE	FALSE	FALSE	TRUE	FALSE
chrI:2868131-2868321	CELE1	TRUE	TRUE	TRUE	TRUE	TRUE
chrI:2990974-2991267	CELE1	FALSE	FALSE	TRUE	FALSE	FALSE
chrI:2991717-2992017	CELE1	TRUE	FALSE	TRUE	FALSE	TRUE
chrI:3039945-3040221	CELE1	FALSE	FALSE	TRUE	FALSE	TRUE
chrI:3052357-3052653	CELE1	FALSE	FALSE	TRUE	TRUE	TRUE
chrI:3077205-3077577	CELE1	FALSE	FALSE	TRUE	TRUE	TRUE
chrI:3086137-3086465	CELE1	TRUE	FALSE	TRUE	TRUE	TRUE
chrI:3142328-3142374	CELE1	TRUE	FALSE	TRUE	FALSE	FALSE
chrI:3143469-3143740	CELE1	TRUE	FALSE	TRUE	TRUE	TRUE
chrI:3148963-3149134	CELE1	TRUE	FALSE	TRUE	FALSE	FALSE
chrI:3157543-3157911	CELE1	FALSE	FALSE	TRUE	FALSE	TRUE
chrI:3166544-3166746	CELE1	TRUE	FALSE	FALSE	FALSE	FALSE
chrI:3184872-3185256	CELE1	TRUE	FALSE	TRUE	FALSE	FALSE
chrI:3191092-3191294	CELE1	TRUE	FALSE	TRUE	TRUE	FALSE
chrI:3221089-3221253	CELE1	FALSE	FALSE	TRUE	FALSE	FALSE
chrI:3221741-3221911	CELE1	TRUE	FALSE	TRUE	FALSE	FALSE
chrI:3254487-3254775	CELE1	TRUE	FALSE	TRUE	FALSE	TRUE
chrI:3260357-3260416	CELE1	FALSE	FALSE	TRUE	FALSE	FALSE
chrI:3263464-3263801	CELE1	TRUE	FALSE	TRUE	FALSE	TRUE
chrI:3275823-3276164	CELE1	TRUE	FALSE	TRUE	FALSE	FALSE
chrI:3318624-3318678	CELE1	FALSE	FALSE	FALSE	FALSE	FALSE
chrI:3331379-3331743	CELE1	TRUE	FALSE	TRUE	TRUE	TRUE
chrI:3335103-3335460	CELE1	TRUE	FALSE	TRUE	TRUE	TRUE
chrI:3337755-3338123	CELE1	TRUE	TRUE	TRUE	TRUE	FALSE
chrI:3366294-3366488	CELE1	TRUE	FALSE	TRUE	FALSE	TRUE
chrI:3412498-3412610	CELE1	TRUE	FALSE	TRUE	FALSE	FALSE
chrI:3413880-3414213	CELE1	FALSE	FALSE	TRUE	FALSE	FALSE
chrI:3463065-3463349	CELE1	TRUE	FALSE	TRUE	FALSE	TRUE
chrI:3505547-3505843	CELE1	TRUE	FALSE	TRUE	FALSE	FALSE
chrI:3510837-3511168	CELE1	FALSE	FALSE	TRUE	TRUE	TRUE
chrI:3552187-3552340	CELE1	FALSE	FALSE	TRUE	TRUE	TRUE
chrI:3557679-3557797	CELE1	FALSE	FALSE	TRUE	TRUE	TRUE
chrI:3582509-3582647	CELE1	FALSE	FALSE	FALSE	FALSE	FALSE
chrI:3613794-3613936	CELE1	FALSE	FALSE	TRUE	FALSE	FALSE
chrI:3682332-3682705	CELE1	TRUE	TRUE	TRUE	TRUE	TRUE
chrI:3795724-3795991	CELE1	TRUE	FALSE	FALSE	FALSE	FALSE
chrI:3807024-3807369	CELE1	TRUE	FALSE	TRUE	FALSE	TRUE
chrI:3853182-3853465	CELE1	FALSE	FALSE	TRUE	FALSE	FALSE
chrI:3871644-3872016	CELE1	FALSE	FALSE	TRUE	FALSE	FALSE
chrI:3885012-3885360	CELE1	FALSE	FALSE	TRUE	FALSE	FALSE
chrI:3888645-3888925	CELE1	FALSE	FALSE	TRUE	FALSE	TRUE
chrI:3911057-3911430	CELE1	FALSE	FALSE	TRUE	TRUE	TRUE
chrI:3982338-3982502	CELE1	FALSE	FALSE	TRUE	FALSE	FALSE
chrI:4135447-4135793	CELE1	FALSE	FALSE	TRUE	FALSE	TRUE
chrI:4142902-4143290	CELE1	FALSE	FALSE	TRUE	FALSE	TRUE
chrI:4204257-4204561	CELE1	FALSE	FALSE	FALSE	FALSE	FALSE
chrI:4586884-4587216	CELE1	FALSE	TRUE	TRUE	TRUE	TRUE
chrI:4587634-4587709	CELE1	FALSE	TRUE	FALSE	FALSE	FALSE
chrI:4610832-4611168	CELE1	FALSE	FALSE	FALSE	FALSE	FALSE
chrI:4696110-4696413	CELE1	FALSE	FALSE	TRUE	FALSE	FALSE
chrI:4703671-4704032	CELE1	TRUE	FALSE	TRUE	FALSE	FALSE
chrI:4706004-4706171	CELE1	FALSE	FALSE	TRUE	TRUE	TRUE
chrI:4751308-4751584	CELE1	TRUE	FALSE	TRUE	TRUE	FALSE
chrI:4824312-4824677	CELE1	FALSE	FALSE	TRUE	TRUE	TRUE
chrI:4910358-4910544	CELE1	FALSE	FALSE	TRUE	FALSE	FALSE
chrI:4910853-4910933	CELE1	FALSE	TRUE	TRUE	TRUE	TRUE
chrI:4914686-4914785	CELE1	TRUE	FALSE	FALSE	TRUE	FALSE
chrI:5745794-5745937	CELE1	FALSE	TRUE	TRUE	TRUE	TRUE
chrI:5861852-5862150	CELE1	TRUE	FALSE	TRUE	FALSE	FALSE
chrI:7059552-7059692	CELE1	TRUE	TRUE	FALSE	FALSE	FALSE
chrI:7553346-7553713	CELE1	TRUE	TRUE	TRUE	TRUE	TRUE
chrI:7728183-7728474	CELE1	FALSE	FALSE	FALSE	FALSE	FALSE
chrI:8130406-8130539	CELE1	FALSE	FALSE	FALSE	FALSE	FALSE
chrI:8313769-8314034	CELE1	FALSE	FALSE	TRUE	FALSE	FALSE
chrI:8360244-8360366	CELE1	FALSE	FALSE	FALSE	FALSE	FALSE
chrI:8408548-8408850	CELE1	FALSE	FALSE	FALSE	FALSE	FALSE
chrI:8726169-8726492	CELE1	FALSE	FALSE	TRUE	FALSE	FALSE
chrI:9545861-9546205	CELE1	TRUE	FALSE	TRUE	TRUE	TRUE
chrI:9605265-9605602	CELE1	TRUE	TRUE	TRUE	TRUE	TRUE
chrI:10032266-10032407	CELE1	TRUE	FALSE	TRUE	FALSE	FALSE
chrI:10372907-10373186	CELE1	TRUE	FALSE	TRUE	TRUE	TRUE
chrI:10402969-10403251	CELE1	FALSE	FALSE	TRUE	FALSE	FALSE
chrI:10747795-10748124	CELE1	TRUE	TRUE	TRUE	FALSE	FALSE
chrI:10749183-10749450	CELE1	TRUE	TRUE	TRUE	TRUE	FALSE
chrI:10774340-10774715	CELE1	TRUE	FALSE	TRUE	FALSE	TRUE
chrI:10889531-10889888	CELE1	TRUE	FALSE	TRUE	TRUE	FALSE
chrI:10939085-10939466	CELE1	TRUE	FALSE	TRUE	FALSE	FALSE
chrI:11057013-11057395	CELE1	TRUE	FALSE	TRUE	TRUE	TRUE
chrI:11082843-11083042	CELE1	FALSE	FALSE	TRUE	TRUE	TRUE
chrI:11168902-11169085	CELE1	TRUE	FALSE	TRUE	TRUE	TRUE
chrI:11333648-11333824	CELE1	FALSE	FALSE	FALSE	FALSE	FALSE
chrI:11832571-11832874	CELE1	FALSE	FALSE	FALSE	FALSE	FALSE
chrI:11969984-11970069	CELE1	FALSE	FALSE	TRUE	TRUE	TRUE
chrI:12180058-12180393	CELE1	FALSE	FALSE	TRUE	FALSE	FALSE
chrI:12429511-12429796	CELE1	FALSE	FALSE	FALSE	FALSE	FALSE
chrI:12646449-12646776	CELE1	TRUE	FALSE	TRUE	FALSE	FALSE
chrI:12735466-12735519	CELE1	TRUE	FALSE	TRUE	TRUE	FALSE
chrI:12778631-12779009	CELE1	FALSE	FALSE	TRUE	FALSE	FALSE
chrI:12787557-12787720	CELE1	FALSE	FALSE	FALSE	FALSE	FALSE
chrI:12819943-12820309	CELE1	FALSE	FALSE	FALSE	TRUE	TRUE
chrI:12822718-12823058	CELE1	FALSE	FALSE	FALSE	FALSE	FALSE
chrI:12852063-12852228	CELE1	TRUE	TRUE	TRUE	TRUE	TRUE
chrI:12912293-12912388	CELE1	FALSE	FALSE	TRUE	FALSE	FALSE
chrI:12960079-12960161	CELE1	FALSE	FALSE	TRUE	FALSE	TRUE
chrI:13021996-13022304	CELE1	FALSE	FALSE	FALSE	FALSE	FALSE
chrI:13296035-13296288	CELE1	FALSE	FALSE	FALSE	FALSE	FALSE
chrI:13373397-13373690	CELE1	TRUE	TRUE	TRUE	FALSE	FALSE
chrI:14350053-14350238	CELE1	FALSE	FALSE	TRUE	TRUE	TRUE
chrI:14430611-14430886	CELE1	FALSE	FALSE	FALSE	FALSE	FALSE
chrI:14479707-14480011	CELE1	TRUE	FALSE	TRUE	TRUE	FALSE
chrI:14519429-14519779	CELE1	TRUE	FALSE	TRUE	TRUE	TRUE
chrI:14600540-14600845	CELE1	TRUE	FALSE	TRUE	TRUE	FALSE
chrI:14662114-14662392	CELE1	TRUE	TRUE	TRUE	TRUE	TRUE
chrI:14748089-14748348	CELE1	FALSE	FALSE	TRUE	TRUE	TRUE
chrI:14754253-14754557	CELE1	FALSE	FALSE	TRUE	FALSE	TRUE
chrI:14800916-14801096	CELE1	FALSE	FALSE	FALSE	FALSE	FALSE
chrI:15006409-15006586	CELE1	TRUE	FALSE	TRUE	TRUE	FALSE
chrI:15006917-15007001	CELE1	FALSE	FALSE	FALSE	FALSE	FALSE
chrI:15017782-15017960	CELE1	FALSE	TRUE	FALSE	FALSE	FALSE
chrII:29185-29552	CELE1	TRUE	FALSE	TRUE	FALSE	FALSE
chrII:267972-268280	CELE1	FALSE	FALSE	FALSE	FALSE	FALSE
chrII:537147-537210	CELE1	FALSE	FALSE	FALSE	FALSE	FALSE
chrII:576812-577152	CELE1	FALSE	FALSE	TRUE	FALSE	FALSE
chrII:714095-714472	CELE1	TRUE	TRUE	TRUE	FALSE	FALSE
chrII:1808439-1808534	CELE1	FALSE	FALSE	TRUE	FALSE	FALSE
chrII:1892926-1892983	CELE1	FALSE	FALSE	FALSE	FALSE	FALSE
chrII:1893151-1893222	CELE1	FALSE	FALSE	FALSE	FALSE	FALSE
chrII:1893360-1893419	CELE1	FALSE	FALSE	FALSE	FALSE	FALSE
chrII:1893461-1893545	CELE1	FALSE	FALSE	FALSE	FALSE	FALSE
chrII:2592878-2593024	CELE1	FALSE	FALSE	FALSE	FALSE	FALSE
chrII:2639172-2639512	CELE1	FALSE	FALSE	TRUE	TRUE	TRUE
chrII:3459207-3459345	CELE1	FALSE	FALSE	FALSE	FALSE	FALSE
chrII:3926557-3926675	CELE1	FALSE	FALSE	TRUE	FALSE	FALSE
chrII:4049996-4050051	CELE1	TRUE	TRUE	TRUE	TRUE	TRUE
chrII:4232673-4232949	CELE1	FALSE	FALSE	FALSE	FALSE	FALSE
chrII:4522046-4522172	CELE1	FALSE	FALSE	TRUE	TRUE	FALSE
chrII:4591700-4592057	CELE1	FALSE	FALSE	TRUE	FALSE	TRUE
chrII:5179967-5180287	CELE1	FALSE	FALSE	FALSE	FALSE	FALSE
chrII:6110134-6110199	CELE1	FALSE	FALSE	FALSE	FALSE	FALSE
chrII:6268342-6268460	CELE1	FALSE	FALSE	TRUE	FALSE	FALSE
chrII:8111645-8111950	CELE1	FALSE	FALSE	FALSE	FALSE	FALSE
chrII:8696293-8696483	CELE1	FALSE	FALSE	FALSE	FALSE	FALSE
chrII:8713607-8713915	CELE1	FALSE	FALSE	TRUE	FALSE	FALSE
chrII:9103402-9103774	CELE1	FALSE	FALSE	TRUE	FALSE	FALSE
chrII:9173881-9174216	CELE1	FALSE	FALSE	FALSE	FALSE	FALSE
chrII:9382367-9382758	CELE1	FALSE	FALSE	FALSE	FALSE	TRUE
chrII:9418656-9418814	CELE1	TRUE	TRUE	TRUE	FALSE	TRUE
chrII:9746115-9746235	CELE1	FALSE	FALSE	FALSE	FALSE	FALSE
chrII:9944450-9944765	CELE1	FALSE	FALSE	FALSE	FALSE	FALSE
chrII:10556054-10556370	CELE1	TRUE	TRUE	TRUE	TRUE	TRUE
chrII:10812166-10812255	CELE1	FALSE	FALSE	FALSE	FALSE	FALSE
chrII:10832048-10832314	CELE1	TRUE	FALSE	TRUE	FALSE	FALSE
chrII:11229338-11229464	CELE1	FALSE	FALSE	FALSE	FALSE	FALSE
chrII:11231998-11232166	CELE1	FALSE	FALSE	TRUE	FALSE	FALSE
chrII:11445434-11445800	CELE1	FALSE	FALSE	TRUE	FALSE	FALSE
chrII:11654535-11654830	CELE1	TRUE	FALSE	TRUE	FALSE	TRUE
chrII:11711187-11711315	CELE1	FALSE	FALSE	FALSE	TRUE	FALSE
chrII:11911981-11912335	CELE1	FALSE	FALSE	FALSE	FALSE	FALSE
chrII:11983582-11983660	CELE1	FALSE	FALSE	FALSE	FALSE	FALSE
chrII:11998476-11998739	CELE1	FALSE	FALSE	FALSE	FALSE	FALSE
chrII:12033289-12033405	CELE1	TRUE	FALSE	FALSE	FALSE	FALSE
chrII:12186061-12186129	CELE1	FALSE	FALSE	FALSE	FALSE	FALSE
chrII:12189560-12189676	CELE1	FALSE	FALSE	TRUE	FALSE	FALSE
chrII:12199968-12200322	CELE1	TRUE	TRUE	TRUE	TRUE	TRUE
chrII:12462009-12462348	CELE1	FALSE	FALSE	TRUE	FALSE	FALSE
chrII:12744170-12744248	CELE1	FALSE	FALSE	FALSE	TRUE	FALSE
chrII:13034253-13034626	CELE1	FALSE	FALSE	TRUE	TRUE	FALSE
chrII:13091865-13092223	CELE1	FALSE	FALSE	TRUE	TRUE	TRUE
chrII:13105157-13105388	CELE1	TRUE	FALSE	TRUE	TRUE	FALSE
chrII:13115068-13115200	CELE1	FALSE	FALSE	FALSE	FALSE	FALSE
chrII:13261922-13262242	CELE1	FALSE	FALSE	FALSE	FALSE	FALSE
chrII:13262420-13262712	CELE1	FALSE	FALSE	TRUE	FALSE	FALSE
chrII:13271220-13271271	CELE1	FALSE	FALSE	TRUE	FALSE	FALSE
chrII:13271354-13271415	CELE1	FALSE	FALSE	TRUE	FALSE	FALSE
chrII:13667659-13667782	CELE1	FALSE	FALSE	TRUE	FALSE	FALSE
chrII:13737182-13737362	CELE1	TRUE	FALSE	FALSE	FALSE	FALSE
chrII:14114620-14114735	CELE1	FALSE	FALSE	FALSE	FALSE	FALSE
chrII:14123741-14123860	CELE1	FALSE	FALSE	TRUE	TRUE	TRUE
chrII:14172420-14172640	CELE1	FALSE	FALSE	FALSE	FALSE	FALSE
chrII:14219903-14220222	CELE1	TRUE	FALSE	TRUE	TRUE	TRUE
chrII:14221903-14222170	CELE1	TRUE	FALSE	TRUE	TRUE	FALSE
chrII:14266252-14266436	CELE1	FALSE	FALSE	TRUE	FALSE	FALSE
chrII:14284174-14284508	CELE1	TRUE	FALSE	TRUE	FALSE	FALSE
chrII:14311094-14311386	CELE1	TRUE	FALSE	TRUE	TRUE	TRUE
chrII:14313217-14313556	CELE1	FALSE	FALSE	TRUE	TRUE	FALSE
chrII:14313732-14314024	CELE1	FALSE	FALSE	FALSE	TRUE	FALSE
chrII:14322120-14322202	CELE1	TRUE	FALSE	FALSE	FALSE	FALSE
chrII:14469666-14469815	CELE1	FALSE	FALSE	TRUE	FALSE	FALSE
chrII:14494688-14494874	CELE1	TRUE	TRUE	TRUE	TRUE	TRUE
chrII:14881295-14881552	CELE1	FALSE	FALSE	FALSE	FALSE	FALSE
chrII:15102538-15102930	CELE1	TRUE	FALSE	TRUE	FALSE	FALSE
chrII:15110613-15110785	CELE1	FALSE	FALSE	FALSE	FALSE	FALSE
chrII:15111873-15112029	CELE1	FALSE	FALSE	FALSE	TRUE	FALSE
chrII:15213262-15213398	CELE1	TRUE	FALSE	TRUE	TRUE	TRUE
chrII:15229773-15229944	CELE1	TRUE	TRUE	TRUE	TRUE	TRUE
chrII:15245964-15246188	CELE1	FALSE	TRUE	TRUE	TRUE	TRUE
chrII:40831-41219	CELE1	TRUE	FALSE	TRUE	TRUE	TRUE
chrII:153319-153601	CELE1	TRUE	FALSE	TRUE	TRUE	TRUE
chrII:405750-406049	CELE1	FALSE	FALSE	TRUE	FALSE	FALSE
chrII:2038283-2038420	CELE1	FALSE	FALSE	TRUE	TRUE	TRUE
chrII:2513133-2513219	CELE1	FALSE	FALSE	TRUE	FALSE	FALSE
chrII:3806043-3806348	CELE1	FALSE	FALSE	TRUE	FALSE	FALSE
chrII:4040634-4040809	CELE1	FALSE	FALSE	FALSE	FALSE	FALSE
chrII:4047673-4047993	CELE1	TRUE	TRUE	TRUE	TRUE	TRUE
chrII:4468775-4468901	CELE1	TRUE	TRUE	TRUE	TRUE	TRUE
chrII:6585613-6585952	CELE1	FALSE	FALSE	FALSE	FALSE	FALSE
chrII:6903408-6903568	CELE1	FALSE	FALSE	FALSE	FALSE	FALSE
chrII:7471707-7472050	CELE1	FALSE	FALSE	TRUE	TRUE	TRUE
chrII:7785724-7786084	CELE1	FALSE	FALSE	FALSE	FALSE	FALSE
chrII:7941904-7942223	CELE1	FALSE	FALSE	TRUE	FALSE	TRUE
chrII:8015202-8015364	CELE1	TRUE	FALSE	TRUE	FALSE	FALSE
chrII:9274359-9274696	CELE1	TRUE	TRUE	TRUE	TRUE	TRUE
chrII:9365108-9365254	CELE1	FALSE	FALSE	TRUE	FALSE	FALSE
chrII:9391157-9391456	CELE1	FALSE	FALSE	FALSE	FALSE	FALSE
chrII:9668671-9668992	CELE1	TRUE	FALSE	TRUE	TRUE	TRUE
chrII:10170260-10170520	CELE1	FALSE	FALSE	TRUE	FALSE	FALSE
chrII:10594355-10594422	CELE1	FALSE	FALSE	TRUE	FALSE	FALSE
chrII:10594427-10594565	CELE1	FALSE	FALSE	TRUE	FALSE	FALSE
chrII:10654652-10654920	CELE1	FALSE	FALSE	FALSE	FALSE	FALSE
chrII:10812717-10812794	CELE1	FALSE	FALSE	TRUE	TRUE	TRUE
chrII:11099468-11099794	CELE1	FALSE	FALSE	FALSE	FALSE	FALSE
chrII:11179175-11179263	CELE1	FALSE	FALSE	FALSE	FALSE	FALSE
chrII:11297090-11297215	CELE1	TRUE	FALSE	TRUE	TRUE	TRUE
chrII:11867582-11867922	CELE1	TRUE	FALSE	TRUE	TRUE	TRUE
chrII:11989439-11989539	CELE1	TRUE	FALSE	FALSE	FALSE	FALSE
chrII:12032414-12032702	CELE1	TRUE	FALSE	TRUE	FALSE	FALSE
chrII:12040442-12040749	CELE1	TRUE	TRUE	TRUE	TRUE	TRUE
chrII:12054978-12055307	CELE1	TRUE	FALSE	TRUE	TRUE	FALSE
chrII:12116580-12116729	CELE1	FALSE	FALSE	FALSE	FALSE	FALSE
chrII:12147894-12148034	CELE1	FALSE	FALSE	TRUE	FALSE	FALSE
chrII:12163483-12163791	CELE1	TRUE	FALSE	TRUE	TRUE	TRUE
chrII:12166815-12166950	CELE1	FALSE	FALSE	TRUE	FALSE	FALSE
chrII:12167139-12167423	CELE1	FALSE	FALSE	TRUE	FALSE	FALSE
chrII:12187060-12187410	CELE1	FALSE	FALSE	TRUE	FALSE	TRUE
chrII:12187899-12188233	CELE1	FALSE	FALSE	FALSE	FALSE	FALSE
chrII:12713090-12713206	CELE1	FALSE	FALSE	TRUE	TRUE	FALSE
chrII:12785615-12785938	CELE1	TRUE	FALSE	TRUE	FALSE	TRUE
chrII:12794424-12794776	CELE1	TRUE	FALSE	TRUE	TRUE	TRUE
chrII:12902495-12902835	CELE1	FALSE	FALSE	FALSE	FALSE	FALSE
chrII:13104813-13105079	CELE1	TRUE	FALSE	TRUE	TRUE	FALSE
chrII:13105512-13105820	CELE1	FALSE	FALSE	FALSE	TRUE	FALSE
chrII:13160971-13161134	CELE1	TRUE	TRUE	TRUE	TRUE	TRUE
chrII:13161541-13161687	CELE1	TRUE	FALSE	TRUE	TRUE	TRUE
chrII:13202159-13202532	CELE1	TRUE	FALSE	FALSE	FALSE	FALSE
chrII:13336515-13336621	CELE1	FALSE	FALSE	FALSE	FALSE	FALSE
chrII:13522257-13522375	CELE1	TRUE	TRUE	TRUE	FALSE	TRUE
chrII:14267208-14267536	CELE1	FALSE	FALSE	TRUE	FALSE	TRUE
chrII:14267537-14267827	CELE1	FALSE	FALSE	TRUE	FALSE	TRUE
chrII:14343802-14344170	CELE1	FALSE	FALSE	FALSE	FALSE	FALSE
chrII:14346610-14347007	CELE1	FALSE	TRUE	TRUE	FALSE	FALSE
chrII:14712772-14712921	CELE1	FALSE	FALSE	FALSE	FALSE	FALSE
chrII:14719842-14719991	CELE1	FALSE	FALSE	TRUE	FALSE	FALSE
chrII:14731924-14732233	CELE1	FALSE	FALSE	FALSE	FALSE	FALSE
chrII:15074986-15075260	CELE1	TRUE	FALSE	TRUE	TRUE	TRUE
chrIII:648926-649287	CELE1	FALSE	FALSE	FALSE	FALSE	FALSE
chrIII:893049-893190	CELE1	FALSE	FALSE	FALSE	FALSE	FALSE
chrIII:1063248-1063502	CELE1	FALSE	FALSE	FALSE	FALSE	FALSE
chrIII:1715715-1716057	CELE1	FALSE	FALSE	FALSE	FALSE	FALSE
chrIII:2490188-2490397	CELE1	FALSE	FALSE	FALSE	FALSE	FALSE
chrIII:2565499-2565840	CELE1	FALSE	FALSE	FALSE	FALSE	FALSE
chrIII:2680017-2680079	CELE1	TRUE	FALSE	FALSE	FALSE	FALSE
chrIII:2689104-2689472	CELE1	FALSE	FALSE	TRUE	TRUE	TRUE
chrIII:2713254-2713304	CELE1	FALSE	FALSE	TRUE	FALSE	FALSE
chrIII:2716755-2717049	CELE1	TRUE	FALSE	TRUE	FALSE	FALSE
chrIII:2735113-2735467	CELE1	FALSE	FALSE	FALSE	FALSE	FALSE
chrIII:3006270-3006706	CELE1	TRUE	FALSE	TRUE	TRUE	TRUE
chrIII:3043338-3043463	CELE1	FALSE	FALSE	TRUE	TRUE	FALSE
chrIII:3290712-3290762	CELE1	TRUE	TRUE	TRUE	TRUE	TRUE
chrIII:3428645-3429028	CELE1	FALSE	FALSE	TRUE	FALSE	FALSE
chrIII:3617346-3617652	CELE1	FALSE	FALSE	TRUE	FALSE	FALSE
chrIII:3655988-3656245	CELE1	FALSE	FALSE	FALSE	FALSE	FALSE
chrIII:3802343-3802496	CELE1	FALSE	FALSE	FALSE	FALSE	FALSE
chrIII:3870433-3870557	CELE1	FALSE	FALSE	FALSE	FALSE	FALSE
chrIII:4096585-4096650	CELE1	TRUE	FALSE	TRUE	TRUE	TRUE
chrIII:4350365-4350714	CELE1	FALSE	FALSE	FALSE	FALSE	FALSE
chrIII:5344706-5345005	CELE1	FALSE	FALSE	TRUE	FALSE	TRUE
chrIII:5455969-5456052	CELE1	FALSE	FALSE	FALSE	FALSE	FALSE
chrIII:5534291-5534647	CELE1	FALSE	FALSE	FALSE	FALSE	FALSE
chrIII:5682924-5683282	CELE1	FALSE	FALSE	TRUE	FALSE	TRUE
chrIII:5717628-5717973	CELE1	FALSE	FALSE	TRUE	FALSE	FALSE
chrIII:6703279-6703427	CELE1	FALSE	FALSE	TRUE	FALSE	FALSE
chrIII:8428628-8428746	CELE1	FALSE	FALSE	FALSE	FALSE	FALSE
chrIII:9233633-9233827	CELE1	FALSE	FALSE	FALSE	FALSE	FALSE
chrIII:9836884-9836943	CELE1	FALSE	FALSE	FALSE	FALSE	FALSE
chrIII:9845912-9846212	CELE1	FALSE	FALSE	FALSE	FALSE	FALSE
chrIII:9907105-9907233	CELE1	FALSE	FALSE	FALSE	FALSE	FALSE
chrIII:10111388-10111717	CELE1	FALSE	FALSE	TRUE	TRUE	TRUE
chrIII:10127978-10128351	CELE1	FALSE	FALSE	FALSE	FALSE	FALSE
chrIII:10133536-10133876	CELE1	FALSE	TRUE	FALSE	FALSE	FALSE
chrIII:10212116-10212228	CELE1	TRUE	TRUE	TRUE	TRUE	TRUE
chrIII:10276813-10277144	CELE1	FALSE	FALSE	TRUE	FALSE	FALSE
chrIII:10279459-10279572	CELE1	FALSE	FALSE	FALSE	FALSE	FALSE
chrIII:10336481-10336756	CELE1	TRUE	FALSE	FALSE	FALSE	FALSE
chrIII:10339347-10339657	CELE1	TRUE	FALSE	TRUE	TRUE	TRUE
chrIII:10358182-10358522	CELE1	FALSE	FALSE	TRUE	FALSE	TRUE
chrIII:10403474-10403816	CELE1	TRUE	FALSE	TRUE	TRUE	TRUE
chrIII:10445383-10445673	CELE1	TRUE	FALSE	TRUE	TRUE	TRUE
chrIII:10558789-10558989	CELE1	FALSE	FALSE	FALSE	FALSE	FALSE
chrIII:10559698-10560039	CELE1	FALSE	FALSE	FALSE	FALSE	FALSE
chrIII:10595833-10595974	CELE1	TRUE	FALSE	TRUE	FALSE	FALSE
chrIII:10603863-10604039	CELE1	TRUE	FALSE	FALSE	FALSE	FALSE
chrIII:10627065-10627429	CELE1	FALSE	FALSE	TRUE	FALSE	FALSE
chrIII:10635907-10636229	CELE1	FALSE	FALSE	TRUE	TRUE	FALSE
chrIII:10639931-10640206	CELE1	TRUE	FALSE	TRUE	FALSE	FALSE
chrIII:10641525-10641815	CELE1	FALSE	FALSE	TRUE	FALSE	FALSE
chrIII:10654434-10654665	CELE1	FALSE	FALSE	TRUE	TRUE	FALSE
chrIII:10710859-10711139	CELE1	TRUE	TRUE	TRUE	TRUE	TRUE
chrIII:10754003-10754330	CELE1	TRUE	FALSE	TRUE	FALSE	TRUE
chrIII:10767951-10768238	CELE1	FALSE	FALSE	FALSE	FALSE	FALSE
chrIII:10802973-10803092	CELE1	TRUE	FALSE	TRUE	FALSE	FALSE
chrIII:10804235-10804603	CELE1	FALSE	FALSE	TRUE	FALSE	FALSE
chrIII:10806272-10806580	CELE1	FALSE	FALSE	TRUE	FALSE	FALSE
chrIII:10830316-10830368	CELE1	FALSE	FALSE	FALSE	FALSE	FALSE
chrIII:10863817-10863982	CELE1	FALSE	FALSE	TRUE	FALSE	TRUE
chrIII:10935043-10935340	CELE1	FALSE	FALSE	FALSE	FALSE	TRUE
chrIII:10940993-10941377	CELE1	FALSE	FALSE	FALSE	FALSE	FALSE
chrIII:11071010-11071366	CELE1	FALSE	FALSE	TRUE	FALSE	TRUE
chrIII:11136042-11136386	CELE1	FALSE	FALSE	FALSE	FALSE	FALSE
chrIII:11154110-11154299	CELE1	TRUE	FALSE	TRUE	TRUE	TRUE
chrIII:11179598-11179895	CELE1	FALSE	FALSE	FALSE	TRUE	FALSE
chrIII:11271953-11272124	CELE1	FALSE	TRUE	TRUE	TRUE	FALSE
chrIII:11513832-11514190	CELE1	FALSE	FALSE	TRUE	TRUE	FALSE
chrIII:11519637-11519931	CELE1	TRUE	FALSE	TRUE	FALSE	FALSE
chrIII:11530203-11530583	CELE1	FALSE	FALSE	TRUE	FALSE	FALSE
chrIII:11591799-11592108	CELE1	TRUE	FALSE	TRUE	FALSE	FALSE
chrIII:11610302-11610616	CELE1	FALSE	FALSE	TRUE	FALSE	FALSE
chrIII:11613343-11613406	CELE1	FALSE	FALSE	FALSE	FALSE	FALSE
chrIII:11619308-11619541	CELE1	FALSE	FALSE	TRUE	FALSE	FALSE
chrIII:11745272-11745565	CELE1	TRUE	FALSE	TRUE	TRUE	TRUE
chrIII:11750712-11751029	CELE1	TRUE	FALSE	TRUE	TRUE	TRUE
chrIII:11781202-11781563	CELE1	FALSE	FALSE	TRUE	FALSE	FALSE
chrIII:11891709-11892010	CELE1	FALSE	FALSE	TRUE	FALSE	TRUE
chrIII:11893886-11893948	CELE1	FALSE	FALSE	FALSE	FALSE	FALSE
chrIII:11901801-11901976	CELE1	TRUE	FALSE	TRUE	FALSE	TRUE
chrIII:11934813-11934962	CELE1	TRUE	FALSE	FALSE	FALSE	FALSE
chrIII:11957257-11957337	CELE1	FALSE	FALSE	FALSE	FALSE	FALSE
chrIII:11981245-11981375	CELE1	TRUE	TRUE	FALSE	FALSE	TRUE
chrIII:11988251-11988589	CELE1	TRUE	FALSE	TRUE	FALSE	FALSE
chrIII:12013352-12013649	CELE1	TRUE	TRUE	TRUE	TRUE	TRUE
chrIII:12015864-12016133	CELE1	TRUE	FALSE	TRUE	FALSE	FALSE
chrIII:12043193-12043454	CELE1	TRUE	FALSE	TRUE	TRUE	TRUE
chrIII:12048104-12048324	CELE1	TRUE	FALSE	TRUE	TRUE	TRUE
chrIII:12062598-12062808	CELE1	FALSE	FALSE	FALSE	TRUE	FALSE
chrIII:12074606-12074761	CELE1	FALSE	FALSE	TRUE	FALSE	FALSE
chrIII:12130310-12130409	CELE1	FALSE	FALSE	FALSE	FALSE	FALSE
chrIII:12149158-12149318	CELE1	FALSE	FALSE	FALSE	FALSE	FALSE
chrIII:12159997-12160151	CELE1	TRUE	FALSE	TRUE	TRUE	TRUE
chrIII:12171781-12172105	CELE1	TRUE	FALSE	TRUE	FALSE	TRUE
chrIII:12213904-12214083	CELE1	TRUE	FALSE	FALSE	FALSE	FALSE
chrIII:12214378-12214617	CELE1	FALSE	FALSE	FALSE	FALSE	FALSE
chrIII:12238866-12238977	CELE1	FALSE	FALSE	FALSE	FALSE	FALSE
chrIII:12282887-12283042	CELE1	FALSE	FALSE	FALSE	FALSE	FALSE
chrIII:12365691-12366030	CELE1	FALSE	FALSE	TRUE	FALSE	FALSE
chrIII:12406131-12406437	CELE1	FALSE	FALSE	TRUE	TRUE	FALSE
chrIII:12455103-12455252	CELE1	TRUE	FALSE	TRUE	TRUE	TRUE
chrIII:12461901-12462198	CELE1	FALSE	FALSE	TRUE	FALSE	FALSE
chrIII:12462599-12462757	CELE1	FALSE	FALSE	TRUE	FALSE	FALSE
chrIII:12474901-12475201	CELE1	FALSE	FALSE	TRUE	FALSE	FALSE
chrIII:12558496-12558608	CELE1	TRUE	TRUE	TRUE	TRUE	TRUE
chrIII:12580194-12580420	CELE1	TRUE	FALSE	TRUE	FALSE	FALSE
chrIII:12651222-12651561	CELE1	TRUE	FALSE	TRUE	FALSE	FALSE
chrIII:12661438-12661665	CELE1	TRUE	FALSE	TRUE	TRUE	TRUE
chrIII:12662984-12663150	CELE1	TRUE	FALSE	TRUE	TRUE	TRUE
chrIII:12670703-12670808	CELE1	TRUE	FALSE	TRUE	FALSE	FALSE
chrIII:12671285-12671401	CELE1	TRUE	FALSE	FALSE	FALSE	FALSE
chrIII:12684106-12684255	CELE1	TRUE	FALSE	FALSE	FALSE	FALSE
chrIII:12684509-12684671	CELE1	FALSE	TRUE	TRUE	TRUE	TRUE
chrIII:12710538-12710977	CELE1	TRUE	FALSE	TRUE	TRUE	FALSE
chrIII:12730237-12730592	CELE1	FALSE	FALSE	FALSE	FALSE	FALSE
chrIII:12733393-12733853	CELE1	TRUE	FALSE	FALSE	FALSE	FALSE
chrIII:12774626-12774753	CELE1	FALSE	FALSE	FALSE	FALSE	FALSE
chrIII:12816603-12816698	CELE1	FALSE	FALSE	FALSE	FALSE	FALSE
chrIII:12825187-12825401	CELE1	FALSE	FALSE	FALSE	FALSE	FALSE
chrIII:12870305-12870387	CELE1	FALSE	TRUE	TRUE	TRUE	FALSE
chrIII:12870666-12870950	CELE1	TRUE	FALSE	TRUE	FALSE	FALSE
chrIII:12889935-12890058	CELE1	FALSE	FALSE	TRUE	FALSE	TRUE
chrIII:12918109-12918384	CELE1	TRUE	FALSE	TRUE	FALSE	FALSE
chrIII:12935205-12935545	CELE1	TRUE	FALSE	TRUE	TRUE	TRUE
chrIII:12990766-12990840	CELE1	FALSE	FALSE	FALSE	FALSE	FALSE
chrIII:13016217-13016551	CELE1	TRUE	TRUE	TRUE	FALSE	FALSE
chrIII:13066369-13066743	CELE1	TRUE	FALSE	TRUE	TRUE	FALSE
chrIII:13097101-13097349	CELE1	TRUE	TRUE	TRUE	TRUE	TRUE
chrIII:13114680-13114890	CELE1	FALSE	FALSE	FALSE	FALSE	FALSE
chrIII:13140756-13140893	CELE1	FALSE	FALSE	FALSE	FALSE	FALSE
chrIII:13144137-13144516	CELE1	FALSE	FALSE	TRUE	FALSE	FALSE
chrIII:13176537-13176879	CELE1	TRUE	FALSE	TRUE	TRUE	FALSE
chrIII:13182546-13182912	CELE1	TRUE	FALSE	TRUE	FALSE	FALSE
chrIII:13183281-13183557	CELE1	FALSE	FALSE	FALSE	FALSE	FALSE
chrIII:13223166-13223523	CELE1	FALSE	FALSE	FALSE	FALSE	FALSE
chrIII:13225746-13226102	CELE1	FALSE	FALSE	TRUE	FALSE	FALSE
chrIII:13265429-13265742	CELE1	TRUE	FALSE	TRUE	TRUE	TRUE
chrIII:13269773-13270093	CELE1	TRUE	TRUE	TRUE	TRUE	TRUE
chrIII:13273125-13273297	CELE1	FALSE	FALSE	TRUE	FALSE	FALSE
chrIII:13277691-13278027	CELE1	TRUE	FALSE	TRUE	FALSE	FALSE
chrIII:13281665-13281944	CELE1	TRUE	FALSE	TRUE	TRUE	FALSE
chrIII:13337335-13337657	CELE1	FALSE	FALSE	FALSE	FALSE	FALSE
chrIII:13337693-13337972	CELE1	FALSE	FALSE	FALSE	FALSE	FALSE
chrIII:13349536-13349824	CELE1	TRUE	TRUE	TRUE	TRUE	FALSE
chrIII:13354435-13354557	CELE1	FALSE	FALSE	FALSE	FALSE	FALSE
chrIII:13431992-13432127	CELE1	FALSE	FALSE	FALSE	FALSE	FALSE
chrIII:13468516-13468682	CELE1	FALSE	FALSE	FALSE	FALSE	FALSE
chrIII:13505506-13505768	CELE1	TRUE	FALSE	TRUE	TRUE	TRUE
chrIII:13549333-13549703	CELE1	TRUE	TRUE	TRUE	TRUE	FALSE
chrIII:13576385-13576719	CELE1	FALSE	FALSE	FALSE	FALSE	FALSE
chrIII:13609624-13609729	CELE1	FALSE	FALSE	TRUE	FALSE	FALSE
chrIII:13627149-13627503	CELE1	FALSE	FALSE	TRUE	TRUE	TRUE
chrIII:13686728-13686835	CELE1	FALSE	FALSE	FALSE	FALSE	FALSE
chrIII:13779391-13779568	CELE1	FALSE	FALSE	FALSE	FALSE	FALSE
chrIII:335171-335540	CELE1	FALSE	FALSE	FALSE	FALSE	FALSE
chrIII:556043-556146	CELE1	FALSE	FALSE	FALSE	FALSE	FALSE
chrIII:556331-556414	CELE1	FALSE	FALSE	FALSE	FALSE	FALSE
chrIII:639332-639405	CELE1	FALSE	FALSE	FALSE	FALSE	FALSE
chrIII:1063517-1063657	CELE1	FALSE	FALSE	FALSE	TRUE	FALSE
chrIII:1063833-1064071	CELE1	TRUE	FALSE	TRUE	TRUE	FALSE
chrIII:1396632-1397027	CELE1	FALSE	FALSE	FALSE	FALSE	FALSE
chrIII:1962235-1962286	CELE1	TRUE	TRUE	TRUE	FALSE	TRUE
chrIII:2359794-2359912	CELE1	FALSE	FALSE	FALSE	TRUE	FALSE
chrIII:2360097-2360272	CELE1	TRUE	FALSE	TRUE	TRUE	TRUE
chrIII:2489864-2490082	CELE1	FALSE	FALSE	TRUE	FALSE	FALSE
chrIII:2490661-2490828	CELE1	FALSE	FALSE	FALSE	FALSE	FALSE
chrIII:2528731-2528791	CELE1	FALSE	TRUE	TRUE	FALSE	TRUE
chrIII:2543981-2544333	CELE1	FALSE	FALSE	TRUE	TRUE	FALSE
chrIII:2617490-2617608	CELE1	FALSE	FALSE	TRUE	TRUE	TRUE
chrIII:2617685-2617738	CELE1	FALSE	FALSE	TRUE	TRUE	TRUE
chrIII:2681789-2681844	CELE1	TRUE	FALSE	TRUE	FALSE	FALSE
chrIII:2685241-2685298	CELE1	TRUE	FALSE	TRUE	TRUE	FALSE
chrIII:2685337-2685398	CELE1	TRUE	FALSE	TRUE	TRUE	TRUE
chrIII:2702756-2703151	CELE1	FALSE	FALSE	FALSE	FALSE	FALSE
chrIII:2717873-2717944	CELE1	TRUE	TRUE	TRUE	TRUE	TRUE
chrIII:2732667-2732939	CELE1	FALSE	FALSE	TRUE	FALSE	FALSE
chrIII:2738907-2738979	CELE1	TRUE	TRUE	TRUE	TRUE	TRUE
[truncated: 61,587 more rows]

## Sheet: IDR peaks and H3K9me enrichment
coordinates	Repeat family	IDR_PEAK_HPL2	IDR_PEAK_LET418	IDR_PEAK_LIN13	IDR_PEAK_LIN61	IDR_PEAK_MET2	H3K9me2	H3K9me3
[truncated: 62,331 more rows]
