# Supplementary material for: A team of heterochromatin factors collaborates with small RNA pathways to combat repetitive elements and germline stress
Source: eLife journal article supplement (doi:10.7554/elife.21666), 2017-03-15
Supplement: supp [file elife-21666-supp-v1.zip › elife_poa_e21666_Figure_3_source_data_2.xlsx]

## Sheet: Column descriptions
Figure 3-source data 2. All repeats upregulated in any mutant strain.
Coordinates	coordinates of repeats
Family	Dfam 2.0 repeat family
Type	Dfam 2.0 repeat type
Class	Dfam 2.0 repeat class
Superfamily	Dfam 2.0 repeat superfamily
Upreg in hpl-2
Upreg in let-418
Upreg in lin-13	Repeats upregulated in mutant strains based on DESeq2; FDR<0.01, log fold change >0.
Upreg in lin-61	Repeats overlapping a gene upregulated in the matched mutant background were filtered out (gene expressed if FDR<0.05, log fold change >0).
Upreg in met-2 set-25	Dfam 2.0 repeats annotaed as rRNA were also removed from the list.
Upreg in prg-1
Upreg in nrde-2
Upreg in nrde-2; let-418
HPL-2 binding
LET-418 binding
LIN-13 binding	Indicates that the repeat overlaps a broad IDR peak call for the given factor.
LIN-61 binding
MET-2 binding
H3K9me2 marked	>1.5 fold enrichment (BEADS score) of H3K9me2 relative to genome median
H3K9me3 marked	>1.5 fold enrichment (BEADS score) of H3K9me3 relative to genome median
Upreg in hpl-2 mapq10
Upreg in let-418 mapq10
Upreg in lin-13 mapq10	Confirmation of upregulated individual repeat elements by analysis of unique reads.
Upreg in lin-61 mapq10	Individual repeat elements were considered upregulated if they had uniquely mapping reads (BWA mapping quality >10) that had >10 unique reads and fold change >1.5.
Upreg in met-2 set-25 mapq10
Upreg in prg-1 mapq10
Upreg in nrde-2 mapq10
Upreg in nrde-2; let-418 mapq10

## Sheet: Repeats upregulated, any strain
Coordinates	Family	Type	Class	Superfamily	Upreg in hpl-2	Upreg in let-418	Upreg in lin-13	Upreg in lin-61	Upreg in met-2 set-25	Upreg in prg-1	Upreg in nrde-2	Upreg in nrde-2; let-418	HPL-2 binding	LET-418 binding	LIN-13 binding	LIN-61 binding	MET-2 binding	H3K9me2 marked	H3K9me3 marked	Upreg in hpl-2 mapq10	Upreg in let-418 mapq10	Upreg in lin-13 mapq10	Upreg in lin-61 mapq10	Upreg in met-2 set-25 mapq10	Upreg in prg-1 mapq10	Upreg in nrde-2 mapq10	Upreg in nrde-2; let-418 mapq10
chrII:14687751-14693374	MIRAGE1	DNA_Transposon	Cut_and_Paste	CMC-Mirage	+	+	+	+	+	+		+						+	+	x	x	x	x	x	x		x
chrV:3325114-3330738	MIRAGE1	DNA_Transposon	Cut_and_Paste	CMC-Mirage	+	+	+	+	+	+		+				+			+	x	x	x	x	x			x
chrII:1076033-1081651	MIRAGE1	DNA_Transposon	Cut_and_Paste	CMC-Mirage	+	+	+	+	+	+		+						+	+	x	x	x	x	x			x
chrII:2266802-2268578	MIRAGE1	DNA_Transposon	Cut_and_Paste	CMC-Mirage	+	+	+	+	+	+		+				+		+	+	x	x	x	x		x		x
chrV:765784-771400	MIRAGE1	DNA_Transposon	Cut_and_Paste	CMC-Mirage	+	+	+	+	+	+		+						+	+	x	x		x	x	x		x
chrIV:507687-513308	MIRAGE1	DNA_Transposon	Cut_and_Paste	CMC-Mirage	+	+	+	+	+	+		+						+	+	x		x	x	x	x		x
chrIV:701905-707528	MIRAGE1	DNA_Transposon	Cut_and_Paste	CMC-Mirage	+	+	+	+	+	+		+						+	+	x		x	x		x		x
chrX:7361071-7363751	CER9-I_CE	Retrotransposon	LTR	Pao	+	+	+		+			+	+					+	+	x	x	x		x			x
chrII:665454-666443	MIRAGE1	DNA_Transposon	Cut_and_Paste	CMC-Mirage	+	+		+	+										+	x	x		x	x
chrII:1560093-1560348	CELE45	Retrotransposon	SINE	tRNA-RTE	+	+		+										+	+	x	x		x
chrI:14247673-14247936	CELE45	Retrotransposon	SINE	tRNA-RTE	+	+		+										+	+	x	x		x
chrIV:4768671-4771530	Vingi-1_CE	Retrotransposon	LINE	Jockey	+		+	+	+			+						+	+	x		x	x	x			x
chrV:3479123-3479779	MIRAGE1	DNA_Transposon	Cut_and_Paste	CMC-Mirage	+		+												+	x		x
chrX:5004229-5004725	CER9-LTR_CE	Retrotransposon	LTR	Pao	+		+							+	+	+	+	+	+	x		x
chrX:16231672-16234900	MIRAGE1	DNA_Transposon	Cut_and_Paste	CMC-Mirage	+			+					+		+	+	+	+	+	x			x
chrX:17706480-17712081	CER16-2-I_CE	Retrotransposon	LTR	Pao	+			+							+	+	+	+	+	x			x
chrX:9249852-9250779	MIRAGE1	DNA_Transposon	Cut_and_Paste	CMC-Mirage	+			+												x			x
chrX:7348992-7349762	CER9-I_CE	Retrotransposon	LTR	Pao	+				+			+						+	+	x				x			x
chrX:293625-293720	CELE46B	DNA_Transposon	Cut_and_Paste	Undefined	+													+
chrII:2593758-2600021	Helitron1_CE	DNA_Transposon	Helitron	Rolling		+	+		+				+	+	+	+	+	+	+		x	x		x
chrV:14200451-14203956	CEMUDR1	DNA_Transposon	Cut_and_Paste	MULE-MuDR		+		+		+	+	+	+	+	+	+	+	+	+		x		x		x	x	x
chrX:2979995-2980271	CELE45	Retrotransposon	SINE	tRNA-RTE		+													+		x
chrV:19105066-19105333	CELE45	Retrotransposon	SINE	tRNA-RTE		+						+			+	+		+			x						x
chrI:13798724-13799011	CELE45	Retrotransposon	SINE	tRNA-RTE		+						+	+	+	+	+	+	+	+		x						x
chrI:14635804-14636072	CELE45	Retrotransposon	SINE	tRNA-RTE		+						+				+		+	+		x						x
chrIII:4060891-4061155	CELE45	Retrotransposon	SINE	tRNA-RTE		+						+							+		x						x
chrV:3719153-3719425	CELE45	Retrotransposon	SINE	tRNA-RTE		+									+			+	+		x
chrV:15578861-15579069	CERP2	DNA_Transposon	Cut_and_Paste	Undefined			+	+	+	+	+	+	+		+			+	+			x	x	x	x	x	x
chrX:7350251-7350851	CER9-I_CE	Retrotransposon	LTR	Pao			+		+			+						+	+			x		x			x
chrII:851568-856236	Helitron1_CE	DNA_Transposon	Helitron	Rolling			+		+					+	+	+	+	+	+			x
chrII:1970523-1976949	Helitron1_CE	DNA_Transposon	Helitron	Rolling			+		+				+	+	+	+	+	+	+
chrII:2002172-2008991	Helitron1_CE	DNA_Transposon	Helitron	Rolling			+						+	+	+	+	+	+	+			x
chrII:1978670-1985741	Helitron1_CE	DNA_Transposon	Helitron	Rolling			+						+	+	+	+	+	+	+
chrII:1961418-1969839	Helitron1_CE	DNA_Transposon	Helitron	Rolling			+						+	+	+	+	+	+	+
chrIII:2960588-2961477	HelitronY1_CE	DNA_Transposon	Helitron	Rolling				+	+	+		+	+	+	+	+	+	+					x	x	x		x
chrV:14901790-14907288	CEMUDR2	DNA_Transposon	Cut_and_Paste	MULE-MuDR				+	+				+		+	+		+	+				x	x
chrII:14370308-14371827	TC4	DNA_Transposon	Cut_and_Paste	TcMar-Tc4				+	+				+			+	+	+	+				x	x
chrX:125670-127180	TC4	DNA_Transposon	Cut_and_Paste	TcMar-Tc4				+	+				+			+		+	+				x	x
chrIV:1992500-1992741	RC35	Undefined	Satellite	Satellite				+	+				+					+					x	x
chrIV:3314542-3317602	CEMUDR1	DNA_Transposon	Cut_and_Paste	MULE-MuDR				+		+	+	+				+	+	+	+				x		x	x	x
chrI:13934571-13936012	CEMUDR1	DNA_Transposon	Cut_and_Paste	MULE-MuDR				+		+	+	+				+		+	+				x			x
chrI:13929880-13934424	CEMUDR1	DNA_Transposon	Cut_and_Paste	MULE-MuDR				+		+	+	+				+		+	+								x
chrV:17146821-17157618	CER15-I_CE	Retrotransposon	LTR	Pao				+					+	+	+	+	+	+	+				x
chrV:17630593-17636334	CEMUDR1	DNA_Transposon	Cut_and_Paste	MULE-MuDR				+			+	+	+		+	+	+	+	+				x			x	x
chrII:2269824-2270276	MIRAGE1	DNA_Transposon	Cut_and_Paste	CMC-Mirage				+								+		+	+				x
chrI:11249121-11249388	CELE45	Retrotransposon	SINE	tRNA-RTE				+										+	+				x
chrIII:13230028-13242581	CER9-I_CE	Retrotransposon	LTR	Pao				+			+	+				+		+	+				x			x	x
chrV:17641654-17648652	Turmoil2	DNA_Transposon	Cut_and_Paste	PIF-Harbinger				+					+		+	+	+	+	+
chrIII:8852515-8853006	LTRCER1	Retrotransposon	LTR	Gypsy				+					+	+	+	+	+	+	+
chrI:12043593-12044282	HelitronY1A_CE	DNA_Transposon	Helitron	Rolling					+	+		+	+	+	+	+	+	+						x	x		x
chrV:8477714-8480096	CER10-I_CE	Retrotransposon	LTR	Pao					+							+		+	+					x
chrX:7351058-7351699	CER9-I_CE	Retrotransposon	LTR	Pao					+			+						+	+					x			x
chrII:14256213-14257758	HelitronY1A_CE	DNA_Transposon	Helitron	Rolling					+			+	+	+	+	+								x			x
chrII:13388740-13389074	CERP3	Undefined	Unknown	Unknown					+															x
chrIII:2342027-2343068	HelitronY1A_CE	DNA_Transposon	Helitron	Rolling					+				+					+						x
chrIII:1437619-1438707	RTE1	Retrotransposon	LINE	Unknown					+				+			+	+	+	+					x
chrIII:2572580-2573056	CELE46B	DNA_Transposon	Cut_and_Paste	Undefined					+				+	+	+	+	+	+						x
chrIII:69870-70181	CeRep5	Undefined	Unknown	Unknown					+				+	+	+	+	+	+						x
chrIII:11251366-11251814	CELE46B	DNA_Transposon	Cut_and_Paste	Undefined					+				+	+	+	+								x
chrIV:1992309-1992471	CER1	Retrotransposon	LTR	Gypsy					+				+					+						x
chrIII:12921009-12921374	PALTTTAAA2	DNA_Transposon	Cut_and_Paste	Undefined					+				+	+	+	+	+	+						x
chrII:2901290-2902404	HelitronY1_CE	DNA_Transposon	Helitron	Rolling					+				+	+	+	+	+	+						x
chrI:2688423-2688722	CELE1	DNA_Transposon	Cut_and_Paste	TcMar-Tc1?					+				+		+	+		+						x
chrII:2895131-2895359	RC35	Undefined	Satellite	Satellite					+						+	+		+						x
chrV:995623-995873	CELE4	DNA_Transposon	Cut_and_Paste	Undefined					+				+	+	+	+	+	+						x
chrIII:850625-850821	PAL8C_4	DNA_Transposon	Cut_and_Paste	hAT					+															x
chrII:15229563-15229738	CER1	Retrotransposon	LTR	Gypsy					+				+		+	+	+	+						x
chrIII:10946592-10946841	CER1	Retrotransposon	LTR	Gypsy					+															x
chrII:6716199-6716281	NeSL-1	Retrotransposon	LINE	R2					+
chrV:2482658-2482821	CELE14B	DNA_Transposon	Cut_and_Paste	Undefined					+						+	+	+	+
chrV:2374697-2374860	CELE14B	DNA_Transposon	Cut_and_Paste	Undefined					+						+			+	+
chrI:10780786-10781040	CERP4	DNA_Transposon	Cut_and_Paste	Undefined						+	+	+				+			+						x	x	x
chrII:996818-998892	TC2	DNA_Transposon	Cut_and_Paste	TcMar-Tc2						+								+	+						x
chrV:721261-722227	Helitron1_CE	DNA_Transposon	Helitron	Rolling						+									+						x
chrIV:2902770-2909931	CEMUDR1	DNA_Transposon	Cut_and_Paste	MULE-MuDR						+			+		+	+	+	+	+
chrI:9679400-9682903	TC4	DNA_Transposon	Cut_and_Paste	TcMar-Tc4								+	+		+	+	+	+	+								x
chrIV:3498478-3501954	TC4	DNA_Transposon	Cut_and_Paste	TcMar-Tc4								+	+	+	+	+	+	+	+
chrV:20509977-20511511	TC4	DNA_Transposon	Cut_and_Paste	TcMar-Tc4								+	+			+	+	+	+								x
chrV:18119672-18121365	CER3-I_CE	Retrotransposon	LTR	Gypsy							+	+					+	+	+							x	x
chrIV:15522360-15522549	CELE46B	DNA_Transposon	Cut_and_Paste	Undefined							+	+		+	+	+	+		+								x
chrIII:946926-947574	CER10-LTR_CE	Retrotransposon	LTR	Pao							+	+			+	+		+	+							x	x
chrV:18121757-18122058	CER3-I_CE	Retrotransposon	LTR	Gypsy								+						+	+								x
chrX:132767-132979	CERP2	DNA_Transposon	Cut_and_Paste	Undefined							+	+						+	+								x
chrV:18122392-18122663	CER3-I_CE	Retrotransposon	LTR	Gypsy								+					+	+	+								x
chrIV:913372-921243	CER3-I_CE	Retrotransposon	LTR	Gypsy							+	+			+			+	+							x	x
chrIV:4128912-4129891	CER2-I_CE	Retrotransposon	LTR	Gypsy							+	+					+	+	+							x	x
chrV:18436443-18442333	CER8-I_CE	Retrotransposon	LTR	Pao							+	+				+		+	+							x	x
chrV:5185249-5189173	CER8-I_CE	Retrotransposon	LTR	Pao							+	+	+			+		+	+							x	x
chrV:5183771-5184450	CER9-I_CE	Retrotransposon	LTR	Pao							+	+	+			+		+	+							x	x
chrV:19870665-19874419	Chapaev-2_CE	DNA_Transposon	Cut_and_Paste	CMC-Chapaev							+	+	+	+	+	+	+	+	+							x	x
chrII:6795027-6798220	TC5	DNA_Transposon	Cut_and_Paste	TcMar-Tc4							+		+		+	+	+	+	+							x
chrV:5189968-5190536	CER8-I_CE	Retrotransposon	LTR	Pao							+	+	+					+	+							x	x
chrIV:8400624-8403816	TC5	DNA_Transposon	Cut_and_Paste	TcMar-Tc4							+		+	+	+	+	+	+	+
chrII:4051251-4054445	TC5	DNA_Transposon	Cut_and_Paste	TcMar-Tc4							+		+	+	+	+	+	+	+							x
chrIV:16312264-16312635	CER2-LTR_CE	Retrotransposon	LTR	Gypsy							+	+			+			+	+								x
chrIV:2368329-2371520	TC5	DNA_Transposon	Cut_and_Paste	TcMar-Tc4							+		+		+	+	+	+	+
chrIV:921244-921667	CER3-LTR_CE	Retrotransposon	LTR	Gypsy							+	+			+		+	+	+
chrV:5184825-5185171	CER9-I_CE	Retrotransposon	LTR	Pao							+	+				+		+	+							x	x
chrIV:16318363-16318598	CER2-1-LTR_CE	Retrotransposon	LTR	Pao							+	+						+	+							x	x
chrV:8878874-8882774	CER9-I_CE	Retrotransposon	LTR	Pao							+	+						+	+
chrV:8836780-8840679	CER9-I_CE	Retrotransposon	LTR	Pao							+	+						+	+
chrI:250721-250953	CELE2	DNA_Transposon	Cut_and_Paste	Undefined							+	+			+	+	+	+	+							x	x
chrIV:4135173-4135471	CER2-LTR_CE	Retrotransposon	LTR	Gypsy							+	+			+	+	+	+	+							x	x
chrV:5200773-5201509	HelitronY1A_CE	DNA_Transposon	Helitron	Rolling							+	+														x	x
chrV:18443906-18455056	CER8-I_CE	Retrotransposon	LTR	Pao							+	+						+	+							x	x
chrV:20301754-20302011	CER12-I_CE	Retrotransposon	LTR	Pao							+	+			+			+	+							x	x
chrIV:4129944-4130074	CER2-LTR_CE	Retrotransposon	LTR	Gypsy							+	+					+	+	+							x	x
chrV:5189168-5189611	CER8-I_CE	Retrotransposon	LTR	Pao							+	+	+					+	+							x	x
chrV:8841673-8844775	CER9-I_CE	Retrotransposon	LTR	Pao							+	+				+		+	+
chrII:10941772-10942383	CER2-1-LTR_CE	Retrotransposon	LTR	Pao							+	+		+	+	+	+	+	+							x
chrV:5478211-5479869	TIR23T5A_CE	DNA_Transposon	Cut_and_Paste	Undefined							+	+	+		+	+	+	+	+							x	x
chrIV:4170109-4170709	CER2-1-LTR_CE	Retrotransposon	LTR	Pao							+	+			+	+	+	+	+
chrV:8833602-8835050	CER8-I_CE	Retrotransposon	LTR	Pao							+	+							+
chrII:2161019-2161356	CER8-I_CE	Retrotransposon	LTR	Pao							+	+				+		+	+							x	x
chrIV:4125869-4126469	CER2-1-LTR_CE	Retrotransposon	LTR	Pao							+	+			+	+	+	+	+
chrV:8874521-8875299	CER9-I_CE	Retrotransposon	LTR	Pao							+	+							+
chrIV:4126492-4126693	CER2-I_CE	Retrotransposon	LTR	Gypsy							+	+			+			+	+							x	x
chrIV:16317927-16318100	CER3-I_CE	Retrotransposon	LTR	Gypsy							+	+						+	+							x	x
chrIV:13293734-13295528	TC5	DNA_Transposon	Cut_and_Paste	TcMar-Tc4							+		+	+	+	+	+	+	+
chrIV:1138186-1138699	CER12-LTR_CE	Retrotransposon	LTR	Pao							+	+			+	+		+	+							x	x
chrIV:13549432-13549528	CeRep56	Undefined	Satellite	Satellite							+							+								x
chrV:8826582-8826953	CER9-I_CE	Retrotransposon	LTR	Pao							+	+							+
chrIV:13295525-13296794	TC5	DNA_Transposon	Cut_and_Paste	TcMar-Tc4							+		+	+	+	+	+	+	+
chrV:8869044-8869688	CER9-I_CE	Retrotransposon	LTR	Pao							+	+							+
chrIII:13161839-13162274	HAT1_CE	DNA_Transposon	Cut_and_Paste	hAT							+					+		+	+							x
chrV:5189723-5189972	CER8-I_CE	Retrotransposon	LTR	Pao							+	+	+					+	+							x	x
chrV:8875696-8877144	CER8-I_CE	Retrotransposon	LTR	Pao							+	+	+						+
chrV:17421657-17428684	NeSL-1	Retrotransposon	LINE	R2							+	+				+		+	+							x	x
chrIV:3313546-3314195	CEMUDR1	DNA_Transposon	Cut_and_Paste	MULE-MuDR							+	+	+	+	+	+	+	+	+
chrV:8826950-8827594	CER9-I_CE	Retrotransposon	LTR	Pao							+	+							+
chrII:13245127-13245304	CER8-I_CE	Retrotransposon	LTR	Pao							+		+		+	+		+	+							x
chrV:8832427-8833205	CER9-I_CE	Retrotransposon	LTR	Pao							+	+							+
chrV:3935067-3935604	CER12-LTR_CE	Retrotransposon	LTR	Pao							+	+			+	+	+	+	+							x	x
chrV:1204591-1205309	Vingi-2_CE	Retrotransposon	LINE	Jockey							+		+			+		+	+							x
chrV:5202530-5202882	CELE2	DNA_Transposon	Cut_and_Paste	Undefined							+															x
chrV:8868676-8869047	CER9-I_CE	Retrotransposon	LTR	Pao							+	+							+
chrV:1201339-1201798	CELE46B	DNA_Transposon	Cut_and_Paste	Undefined							+	+	+		+			+	+							x	x
chrI:250418-250696	CELE1	DNA_Transposon	Cut_and_Paste	TcMar-Tc1?							+	+			+	+	+	+	+							x	x
chrV:5179680-5180253	CER8-LTR_CE	Retrotransposon	LTR	Pao							+	+			+	+	+	+	+							x	x
chrI:10487316-10487446	CELE1	DNA_Transposon	Cut_and_Paste	TcMar-Tc1?							+	+			+		+	+	+							x	x
chrIV:528728-529264	CER12-LTR_CE	Retrotransposon	LTR	Pao							+				+	+	+	+	+							x
chrX:13481271-13481486	CER9-LTR_CE	Retrotransposon	LTR	Pao							+							+	+
chrV:20305338-20305785	CER12-I_CE	Retrotransposon	LTR	Pao							+	+						+	+							x	x
chrIV:16313526-16314839	CER2-I_CE	Retrotransposon	LTR	Gypsy								+						+	+								x
chrV:19270553-19281545	CER12-I_CE	Retrotransposon	LTR	Pao								+			+			+	+								x
chrV:18118900-18119673	CER3-I_CE	Retrotransposon	LTR	Gypsy								+				+		+	+								x
chrV:18724288-18724712	HelitronY1A_CE	DNA_Transposon	Helitron	Rolling								+						+	+								x
chrV:5204315-5204535	CELE46B	DNA_Transposon	Cut_and_Paste	Undefined								+	+	+	+												x
chrV:20309576-20310104	CER12-1-LTR_CE	Retrotransposon	LTR	Pao								+			+	+		+	+								x
chrII:8289329-8289486	CeRep53	Undefined	Satellite	Satellite								+						+	+
chrV:20299682-20300210	CER12-1-LTR_CE	Retrotransposon	LTR	Pao								+			+			+	+
chrII:2163343-2163981	CER9-I_CE	Retrotransposon	LTR	Pao								+				+		+	+								x
chrV:18721101-18722282	HelitronY1A_CE	DNA_Transposon	Helitron	Rolling								+															x
chrII:2162709-2163347	CER9-I_CE	Retrotransposon	LTR	Pao								+						+	+								x
chrX:17123955-17127395	CER9-I_CE	Retrotransposon	LTR	Pao								+						+	+								x
chrII:2159823-2160612	CER9-I_CE	Retrotransposon	LTR	Pao								+						+	+								x
chrX:17117595-17118678	CER9-I_CE	Retrotransposon	LTR	Pao								+						+	+								x
chrV:791403-797901	CER16-I_CE	Retrotransposon	LTR	Pao								+			+	+		+	+								x
chrII:2161902-2162493	CER9-I_CE	Retrotransposon	LTR	Pao								+			+	+		+	+								x
chrII:2158617-2159538	CER9-I_CE	Retrotransposon	LTR	Pao								+				+		+	+								x
chrIV:1977130-1977561	CER3-1-LTR_CE	Retrotransposon	LTR	Gypsy								+	+		+	+	+	+	+
chrV:18122664-18123096	CER3-1-LTR_CE	Retrotransposon	LTR	Gypsy								+	+		+	+	+	+	+								x
chrII:8291541-8291698	CeRep53	Undefined	Satellite	Satellite								+						+	+								x
chrX:17122716-17123724	CER9-I_CE	Retrotransposon	LTR	Pao								+							+								x
chrV:18118467-18118899	CER3-1-LTR_CE	Retrotransposon	LTR	Gypsy								+	+		+	+	+	+	+
chrV:15596518-15598174	TIR23T5A_CE	DNA_Transposon	Cut_and_Paste	Undefined								+			+	+	+	+	+								x
chrII:8290176-8290242	CeRep53	Undefined	Satellite	Satellite								+						+	+
chrII:8291829-8291963	CeRep53	Undefined	Satellite	Satellite								+						+	+
chrI:11824757-11825078	CER7-LTR_CE	Retrotransposon	LTR	Pao								+						+	+								x
chrII:8290578-8290700	CeRep53	Undefined	Satellite	Satellite								+						+	+
chrII:4495245-4495510	CELE45	Retrotransposon	SINE	tRNA-RTE								+				+		+									x
chrII:8288855-8289012	CeRep53	Undefined	Satellite	Satellite								+						+	+
chrII:8286673-8287307	Vingi-2_CE	Retrotransposon	LINE	Jockey								+						+	+								x
chrII:3314417-3314542	MAR_CE	DNA_Transposon	Cut_and_Paste	TcMar-Mariner								+															x
chrII:8289645-8289802	CeRep53	Undefined	Satellite	Satellite								+						+	+
chrIII:4043029-4047703	CER6-I_CE	Retrotransposon	LTR	Gypsy								+							+								x
chrIV:3318722-3319255	CEMUDR1	DNA_Transposon	Cut_and_Paste	MULE-MuDR								+	+		+	+		+	+
