# Supplementary material for: A team of heterochromatin factors collaborates with small RNA pathways to combat repetitive elements and germline stress
Source: eLife journal article supplement (doi:10.7554/elife.21666), 2017-03-15
Supplement: supp [file elife-21666-supp-v1.zip › elife_poa_e21666_Figure_3_source_data_3.xlsx]

## Sheet: Legend
Figure 3-source data 3: Gene expression analyses
Gene expression data
DESeq2 results showing adjusted p-value (padj), maximum posterior estimates of log2 fold change (LFC), and RPKM values for each condition.
Mutants were grown under two conditions. Each condition had matching N2 replicates
Condition 1: grown at 20C to L4 stage, then shifted to 25C and collected as young adults (hpl-2, let-418, lin-61, met-2 set-25, and N2).
Condition 2: grown at 15C to L4 stage, then shifted to 25C and collected as young adults (lin-13, prg-1, nrde-2, nrde-2; let-418, and N2).
NA: data insufficient to calculate p-value
up- and down- regulated genes
We used a false discovery rate (FDR) < 0.01 and LFC > 1 to call genes up-regulated (TRUE in upreg columns), and FDR < 0.01 and LFC < -1 to call genes down-regulated (TRUE in downreg columns)
To avoid small differences in developmental stages from contributing to apparent gene expression differences, we also excluded genes whose wild-type expression oscillates repeatedly during development
IDR peaks and H3K9me enrichment
TRUE indicates overlap with IDR peak from indicated factor or >1.5-fold enrichment (BEADS score) of H3K9me2 or H3K9me3 relative to the genome median.

## Sheet: Gene expresion data
position	locus	GeneID	WBID	padj_hpl-2	padj_let-418	padj_lin-13	padj_lin-61	padj_met-2 set-25	padj_nrde-2	padj_nrde2; let418	padj_prg-1	LFC_hpl-2	LFC_let-418	LFC_lin-13	LFC_lin-61	LFC_met-2 set-25	LFC_nrde-2	LFC_nrde-2; let-418	LFC_prg-1	rpkm_hpl-2_condition1	rpkm_let-418_condition1	rpkm_lin-13_condition2	rpkm_lin-61_condition1	rpkm_met-2 set-25_condition1	rpkm_nrde-2_condition2	rpkm_nrde-2; let-418_condition2	rpkm_prg-1_condition2	rpkm_N2_condition2	rpkm_N2_condition1
chrI:5107846-5110167:+	aap-1	Y110A7A.10	WBGene00000001	0.720127	0.760816	0.00358086	0.513033	0.00951144	0.569815	0.898507	0.813438	0.0543525	-0.0502687	-0.367937	0.0881964	-0.264371	0.1255	-0.0289494	0.0638936	50.2346	46.0522	34.4251	48.0283	38.3429	48.9322	43.8388	46.8345	49.9236	52.6492
chrIV:9598960-9601678:-	aat-1	F27C8.1	WBGene00000002	0.549142	0.295328	0.994981	0.356741	0.772531	0.661323	0.000715436	0.915487	-0.225352	0.354457	0.00463822	-0.313555	-0.114652	0.239887	0.913179	0.0727983	2.5037	3.99917	2.83101	2.17471	2.63021	3.43701	5.88862	2.99746	3.14465	3.29459
chrV:9244389-9246337:-	aat-2	F07C3.7	WBGene00000003	0.633604	0.0203395	0.675603	0.971566	0.96628	0.926738	0.809253	0.532926	0.173123	0.619704	0.171248	0.0164424	0.0195046	-0.0721819	0.109071	-0.284874	3.79497	5.34617	4.30698	3.12957	3.21048	3.54025	4.09484	2.97562	4.18266	3.58944
chrX:2554224-2557718:+	aat-3	F52H2.2	WBGene00000004	0.374909	0.478828	0.996965	0.915384	0.696687	0.971378	0.458698	0.848434	0.2309	-0.203766	-0.00221084	0.0375311	-0.113197	0.0286085	-0.234145	-0.102203	8.02224	5.68635	6.01716	6.48467	5.91189	6.1335	5.02103	5.56316	6.71965	7.33249
chrIV:6272580-6275702:-	aat-4	T13A10.10	WBGene00000005	0.00534229	0.0411521	0.197499	0.0432201	0.017258	0.0911208	0.00669589	0.258206	-0.550519	-0.430955	-0.343663	-0.416159	-0.454294	-0.472806	-0.63435	-0.350467	6.52948	7.05772	7.1694	6.75022	6.71678	6.49875	5.7294	7.14538	10.411	10.7389
chrI:2571778-2576022:-	aat-5	C55C2.5	WBGene00000006	0.487572	0.0202678	0.305536	0.160932	0.140153	0.707364	0.401983	0.15208	-0.181624	-0.495044	0.257113	-0.317914	-0.312791	-0.160481	-0.224359	-0.373855	6.50892	5.06449	8.82352	5.49721	5.63946	6.45261	6.146	5.49211	8.11856	8.12339
chrV:11466824-11470645:-	aat-6	T11F9.4	WBGene00000007	0.207082	0.763026	0.498488	0.703421	0.204506	0.0952578	0.524736	0.0233281	-0.337967	-0.108897	0.200368	-0.123804	0.31067	-0.456389	-0.191393	-0.553559	4.13045	4.88215	7.78623	4.56136	6.50984	4.72411	5.78419	4.38243	7.4619	5.85305
chrII:1386895-1391574:+	aat-7	F54D12.3	WBGene00000008	0.364428	0.646614	0.995987	0.721302	0.709687	0.652212	0.810027	NA	-0.409609	-0.246285	-0.00494293	0.187049	0.192473	-0.325784	-0.147562	-0.0363698	0.226502	0.322654	0.489107	0.628886	0.636525	0.254199	0.37651	0.461624	0.550064	0.554477
chrIV:3862123-3865024:-	aat-8	F28F9.4	WBGene00000009	NA	NA	0.581133	NA	0.789977	NA	0.733436	NA	0.0791419	0.331358	0.27199	0.128812	0.118726	0.181577	0.182971	0.226565	0.127787	0.268736	0.444098	0.144035	0.142348	0.369817	0.367686	0.403898	0.250415	0.096441
chrI:11388738-11396651:-	aat-9	Y53H1C.1	WBGene00000010	0.717899	0.883975	0.563025	0.893278	0.160368	0.830612	0.610905	0.908823	0.0653831	0.0317439	-0.139304	0.0271704	-0.187912	-0.0891019	-0.124635	-0.0475847	22.6877	21.8682	18.206	20.6124	18.1091	18.8781	18.4025	19.4586	22.4816	23.5841
chrI:3886114-3887083:-	abf-1	C50F2.9	WBGene00000012	0.735541	0.96921	0.974277	0.619655	0.705161	0.998981	0.954194	NA	0.17772	0.0265326	-0.024801	0.240594	0.190962	-0.00237053	0.040923	0.357212	2.63807	1.92318	1.91603	2.75732	2.56768	2.00118	2.18334	3.65767	2.25107	2.01664
chrI:3885551-3885964:-	abf-2	C50F2.10	WBGene00000013	NA	NA	0.661588	0.918574	0.682283	NA	0.553666	NA	0.144017	-0.382619	0.230267	0.0588721	0.197265	0.15223	0.286843	0.433919	1.34483	0.240906	1.05819	1.05402	1.38582	0.89973	1.20597	1.59603	0.610019	1.089
chrV:15817391-15817827:-	abf-3	F54B8.5	WBGene00000014	NA	NA	NA	NA	NA	NA	NA	NA	0	0.0661709	NA	0	0	NA	NA	NA	0	0.12313	0	0	0	0	0	0	0	0
chrV:20557914-20558348:-	abf-4	Y38H6C.22	WBGene00000015	NA	NA	NA	NA	NA	NA	NA	NA	0.0837156	0.0445859	0.434989	-0.00214329	-0.0210427	0.146961	0.0411784	-0.0189215	0.243659	0.167964	1.11236	0.0734657	0.052176	0.444286	0.248682	0.146337	0.190004	0.0926301
chrX:12792779-12793316:+	abf-5	T22H6.5	WBGene00000016	0.57149	0.679668	0.0390954	0.359061	0.765724	0.805629	0.984081	0.842248	0.248149	-0.201859	0.740451	-0.367401	0.137535	0.197216	-0.0128807	-0.151788	7.66998	4.98237	11.2476	4.03871	6.61403	6.8981	5.65026	4.93626	6.38218	6.66163
chrX:12794107-12794803:+	abf-6	T22H6.7	WBGene00000017	0.951028	0.408451	0.822076	0.0726752	0.83827	0.590309	0.171812	0.800446	0.0311153	-0.325506	0.112948	-0.587987	0.0932009	-0.292462	-0.474816	-0.162774	10.6307	7.67169	11.8055	5.77918	10.6987	8.40862	7.15665	9.35594	12.0058	11.2722
chrX:10605769-10624122:-	abl-1	M79.1	WBGene00000018	0.0159622	0.269383	0.592146	0.00283684	0.00506678	0.825404	0.0620438	0.844489	0.328294	0.180796	0.114743	0.390775	0.356482	-0.080638	-0.308132	0.0655329	10.0093	8.88355	10.0506	9.77919	9.76436	8.71735	7.40072	9.69508	10.3167	8.61539
chrIV:10206171-10214889:-	abt-1	C24F3.5	WBGene00000019	4.78225e-05	0.257626	0.959676	0.00283436	0.00228886	0.950416	0.388439	0.701917	-1.09999	-0.378831	0.033913	-0.828202	0.768727	-0.0658614	0.35598	-0.239008	0.507269	0.946859	2.52242	0.60648	2.2873	2.30743	3.35983	1.97177	2.72954	1.42714
chrI:2255925-2272868:-	abt-2	F12B6.1	WBGene00000020	2.87162e-32	0.340969	2.50507e-22	2.67306e-19	3.92575e-32	0.75427	0.125008	0.0863133	1.48112	0.183897	1.23775	1.15973	1.4598	0.104657	0.262268	0.305248	8.00518	3.09835	9.12838	5.94301	7.53406	4.03338	4.52355	4.66645	4.16927	2.98894
chrV:323778-330728:-	abt-4	Y39D8C.1	WBGene00000022	0.00180929	0.0711053	0.0687199	0.023338	2.25526e-20	0.407505	8.90297e-05	5.71046e-29	0.517692	0.337361	0.345432	0.395581	1.32615	0.224882	0.648143	1.62658	5.8689	5.07053	5.96231	5.00992	10.0923	5.44195	7.42834	15.126	5.14912	4.36716
chrI:12011267-12018659:+	abt-5	Y53C10A.9	WBGene00000023	0.330864	0.547451	0.0758329	0.710409	0.000483595	0.700482	0.0214462	0.982653	0.340757	0.240902	0.594118	0.1524	0.921321	0.241316	0.730626	-0.0205512	1.17228	1.06545	2.77076	0.934564	1.79672	2.05116	3.10936	1.63449	1.8497	0.95317
chrV:10380316-10381800:-	abu-1	AC3.3	WBGene00000024	NA	NA	0.0722454	NA	NA	NA	0.950362	NA	-0.103445	-0.043642	0.641658	-0.000203522	0.603806	0.00827364	-0.0388808	-0.19198	0.0220705	0.0465019	0.857041	0.0645575	0.394761	0.194778	0.157883	0.0588701	0.207563	0.0746545
chrX:1408831-1410647:-	abu-2	F19G12.7	WBGene00000025	NA	NA	NA	NA	NA	NA	NA	NA	0.254306	-0.0997304	0.0945305	-0.0515594	-0.000582365	0.164562	0.45549	-0.103818	0.144001	0	0.0783477	0.016283	0.0362247	0.113281	0.27182	0	0.0421126	0.0404003
chrX:17553344-17554374:+	abu-3	F31A3.1	WBGene00000026	NA	NA	NA	NA	NA	NA	NA	NA	0.0345911	0	-0.0396767	0	0.0954841	-0.0115053	-0.0391811	-0.0397109	0.0424759	0	0	0	0.109076	0.0298455	0	0	0.0507794	0
chrV:2274881-2275976:+	abu-4	Y5H2A.3	WBGene00000027	NA	NA	NA	NA	NA	NA	NA	NA	-0.26401	-0.259992	-0.00942814	-0.260651	-0.147656	-0.0659081	0.0341691	-0.0534189	0.0302982	0.0313698	0.0885264	0.0306783	0.100028	0.0426615	0.123006	0.0526278	0.105652	0.237746
chrIV:15590665-15591740:+	abu-5	Y105C5A.4	WBGene00000028	NA	NA	NA	NA	NA	NA	NA	NA	-0.080586	-0.0371751	0.0768114	-0.0387391	-0.0232345	0.0303064	0	0.0367944	0	0.0329812	0.0557978	0.0310435	0.0420548	0.0215847	0	0.0266271	0	0.070024
chrV:5160656-5161877:-	abu-6	C03A7.7	WBGene00000029	NA	NA	0.0119813	NA	NA	NA	0.25909	NA	0.141898	0	0.826561	0.0984198	0.379748	0.592357	0.425052	0.12284	0.079075	0	0.829214	0.050496	0.2088	0.513913	0.347882	0.0932154	0	0
chrV:5163380-5164743:-	abu-7	C03A7.8	WBGene00000030	NA	NA	0.216186	NA	NA	NA	0.316166	NA	0	0	0.479884	0.139669	0.604426	0.597159	0.403308	-0.136285	0	0	0.507634	0.0687731	0.348067	0.631743	0.429684	0.0203798	0.108685	0
chrV:5192977-5194592:-	abu-8	C03A7.14	WBGene00000031	NA	NA	0.00409326	0.748399	0.0198074	1.03656e-06	2.38863e-06	0.929742	-0.00752409	0.239213	1.11914	-0.138303	0.719642	1.78053	1.69185	0.0849371	0.0811399	0.212272	1.26116	0.0183544	0.520383	2.59677	2.39441	0.219362	0.167762	0.0918245
chrX:8322059-8323291:+	abu-9	R09F10.2	WBGene00000032	NA	NA	NA	NA	NA	NA	NA	NA	-0.0415433	0.00577651	0.184236	-0.0767995	0.0429651	0.0540143	0.08127	0.207013	0.054361	0.0877177	0.155356	0.0275214	0.109534	0.0648705	0.0821916	0.168891	0.0325578	0.0931189
chrX:3798163-3799725:+	abu-10	F35A5.3	WBGene00000033	NA	NA	0.00444993	0.954693	0.0214405	0.872457	0.817329	NA	-0.160504	-0.0339909	1.04825	0.0284187	0.678671	0.150034	-0.137761	-0.38162	0.0243627	0.100699	1.8354	0.132134	0.700508	0.473837	0.221598	0.064984	0.370863	0.136155
chrII:192531-194558:-	abu-11	T01D1.6	WBGene00000034	0.974458	0.900152	0.00126838	0.827625	0.0114324	0.868685	0.923858	NA	0.0205907	0.074689	1.22074	0.114612	0.872627	0.162506	0.0684961	0.114941	0.243005	0.279428	2.14991	0.288434	1.09601	0.504369	0.416333	0.46395	0.398068	0.247727
chrX:16367157-16373710:+	ace-1	W09B12.1	WBGene00000035	0.819937	0.89941	0.72516	0.159241	0.596261	0.754769	0.574539	0.828801	-0.0774609	-0.0479453	0.119177	-0.347727	-0.147886	-0.14993	0.170215	0.104024	3.98159	4.0224	5.07085	3.02083	3.60819	4.12521	5.2671	5.00993	5.16514	4.59909
chrI:3302094-3307467:-	ace-2	Y44E3A.2	WBGene00000036	0.195772	0.000406654	0.000768787	1.18561e-09	0.048947	0.0473086	0.00118414	0.0990075	-0.22983	-0.540356	0.576929	-0.880879	-0.304021	-0.412944	-0.576868	-0.351042	12.8077	10.0848	20.8428	7.44785	11.6017	10.0877	8.93349	10.5649	15.2597	16.4748
chrII:14205558-14210105:+	ace-3	Y48B6A.8	WBGene00000037	0.343703	7.63011e-08	0.671235	0.636885	0.974128	0.758543	0.0076827	0.694947	0.354852	1.47064	0.215717	-0.201293	-0.0175258	-0.232093	0.903247	-0.255686	1.65537	4.10399	1.51969	0.935795	1.14592	0.992232	2.79381	0.96768	1.3861	1.31284
chrII:14197971-14205250:+	ace-4	Y48B6A.7	WBGene00000038	0.981679	0.73078	0.567296	0.869737	0.653894	0.994859	0.863109	NA	-0.0139535	0.189197	0.300843	-0.0935158	0.219805	0.00984446	0.112269	-0.00832976	0.256547	0.369907	0.508962	0.203932	0.369369	0.312045	0.374134	0.296342	0.336725	0.28728
chrX:5092250-5097036:-	acn-1	C42D8.5	WBGene00000039	0.831449	0.760277	3.93491e-07	0.963025	0.0183307	0.000828751	0.00910573	0.544743	-0.104292	0.14668	1.49592	-0.0245113	0.697956	1.09179	0.854406	-0.333128	0.988429	1.22339	4.25614	0.994257	1.87943	3.03141	2.46708	0.821336	1.26349	1.18215
chrX:11339810-11343504:+	aco-1	ZK455.1	WBGene00000040	0.0138157	0.00222129	0.245959	0.270547	0.330187	0.0412975	0.000394348	5.30758e-05	-0.203837	-0.247173	-0.149113	-0.105128	0.0913976	-0.254141	-0.370271	-0.417668	146.818	140.478	158.06	147.031	172.711	146.777	135.183	130.734	195.911	184.509
chrIII:7973652-7977260:+	aco-2	F54H12.1	WBGene00000041	0.0203679	0.55243	0.0161479	0.364933	0.766357	0.771798	0.234049	0.203413	-0.185408	-0.0641748	-0.232632	-0.0855118	0.0330848	0.0606856	0.130574	0.153424	448.739	482.008	410.951	449.752	500.228	505.128	530.587	539.17	539.872	556.622
chrX:6702653-6709263:+	acr-2	K11G12.2	WBGene00000042	0.139037	0.214285	0.388617	0.00498418	0.350194	0.954317	0.939163	NA	-0.618589	-0.54825	0.427118	-1.03372	-0.408277	0.071042	0.0578869	-0.207145	0.360499	0.397066	0.73091	0.145669	0.467398	0.459235	0.449598	0.29531	0.458373	0.899102
chrX:6709499-6712887:+	acr-3	K11G12.7	WBGene00000043	NA	NA	0.774118	0.995691	0.905554	NA	0.812976	NA	-0.0835141	-0.133108	0.167372	-0.00536541	-0.0666115	0.052489	-0.14075	-0.186616	0.223587	0.195009	0.433321	0.247997	0.222694	0.354804	0.225185	0.201523	0.352838	0.293538
chrIII:6509646-6514715:-	acr-5	K03F8.2	WBGene00000044	0.761015	0.626527	0.557111	0.183633	0.28869	0.857944	0.0509906	0.830815	-0.168073	0.261525	-0.317358	-0.560872	-0.4504	-0.17426	0.805639	-0.182835	0.61886	1.01211	0.310271	0.329346	0.412209	0.395019	1.31018	0.387761	0.562131	0.828573
chrI:4359208-4362549:+	acr-6	ZK973.5	WBGene00000045	NA	NA	0.542145	NA	0.973344	NA	0.733466	NA	-0.0864598	-0.240013	-0.270805	-0.2062	0.018667	-0.25322	-0.168765	-0.0363342	0.148582	0.078322	0.112227	0.0879682	0.186886	0.124851	0.167503	0.246638	0.306141	0.208428
chrII:7845610-7849745:-	acr-7	T09A5.3	WBGene00000046	0.484544	0.8858	0.346203	0.22606	0.971734	0.647082	0.387247	NA	-0.337116	-0.0921369	0.45419	-0.516683	-0.0237341	-0.337202	-0.417668	-0.0270832	0.402115	0.590662	0.852588	0.265703	0.6202	0.253708	0.204303	0.439334	0.514387	0.739482
chrX:10412703-10416596:+	acr-8	ZC504.2	WBGene00000047	0.941388	0.907649	0.726447	0.947282	0.97739	0.921682	0.967952	0.751865	-0.0441311	-0.0708788	0.204266	-0.0413369	0.0174563	-0.104595	-0.0301596	-0.238478	1.03817	0.997044	1.37121	0.97041	1.05672	0.977352	1.06906	0.848111	1.23254	1.18448
chrX:13642278-13646828:-	acr-9	C40C9.2	WBGene00000048	0.353805	0.000595408	0.563136	0.645062	0.317526	NA	0.982407	NA	0.425469	1.24783	0.299559	0.235018	0.430795	-0.0791157	0.0165088	-0.162711	0.421415	1.1104	0.433655	0.29242	0.407431	0.211534	0.263573	0.175237	0.283116	0.218276
chrX:4022251-4025561:+	acr-10	R02E12.8	WBGene00000049	NA	NA	0.909985	0.502853	0.822537	NA	NA	NA	-0.0129087	-0.123066	0.0676449	-0.296731	0.118926	-0.00682108	0.141612	0.131485	0.27642	0.213346	0.149566	0.122595	0.333005	0.113776	0.187589	0.180785	0.130327	0.309206
chrI:6621629-6624895:-	acr-11	D2092.3	WBGene00000050	0.63674	0.98142	0.627743	0.556437	0.243183	0.900473	0.646375	0.575055	0.242793	-0.0159728	0.270335	-0.284961	0.478417	0.131099	0.255462	0.368775	1.0275	0.746275	0.923214	0.49231	1.24798	0.777396	0.908106	1.03747	0.726989	0.841461
chrX:13532851-13536324:+	acr-12	R01E6.4	WBGene00000051	0.834411	0.578683	0.194941	0.8301	0.751746	0.860794	0.587736	0.562702	0.119544	0.280598	0.566522	0.118133	0.160698	-0.166784	0.28573	-0.371298	0.851216	0.997676	1.44781	0.789995	0.849638	0.659276	1.08947	0.500673	0.886271	0.812195
chrII:8174793-8177143:-	acr-14	T05C12.2	WBGene00000053	NA	NA	0.312765	0.527991	0.966955	NA	NA	NA	0.153177	-0.144257	0.396442	-0.243437	0.0226955	-0.075417	0.0664224	0.0677941	0.271412	0.102652	0.357586	0.0526466	0.181916	0.0871661	0.156512	0.157952	0.13616	0.197004
chrV:8552673-8555366:+	acr-15	F25G6.4	WBGene00000054	0.570144	0.75047	0.942351	0.484902	0.960342	0.869622	0.239578	0.721585	-0.244428	-0.157993	0.0480138	-0.284484	-0.0272777	-0.138344	-0.464968	-0.229281	1.9514	2.08358	2.7374	1.76376	2.2682	2.33105	1.70874	2.13907	2.93438	2.65648
chrV:8561194-8564298:+	acr-16	F25G6.3	WBGene00000055	0.723718	0.406909	0.827657	0.501386	0.760874	0.931264	0.944986	0.802853	-0.15454	-0.324589	0.109292	-0.260899	-0.128944	0.0745885	0.0403876	0.159324	1.92072	1.63223	2.27308	1.63394	1.87561	2.2131	2.14485	2.3724	2.31238	2.38929
chrV:2608654-2615245:+	acr-17	F53E10.2	WBGene00000056	0.259931	0.87605	0.506008	0.404655	0.620886	0.905723	0.805429	0.655239	0.486685	0.0990426	0.344667	0.375575	0.238493	0.125496	-0.155794	0.311766	1.1648	0.743894	1.11249	0.966684	0.84979	0.869627	0.600625	1.07195	0.82314	0.725271
chrV:15551136-15559128:-	acr-18	F28F8.1	WBGene00000057	0.976731	0.480746	0.779192	0.909992	0.0108721	0.245162	0.203324	0.553196	0.0152527	-0.275032	0.13837	-0.0542387	0.693192	-0.498592	-0.462206	-0.307173	2.69777	2.07057	3.64788	2.37486	4.47812	2.1051	2.16777	2.49276	3.62934	2.90291
chrI:9031267-9036688:-	acr-19	C31H5.3	WBGene00000058	0.739518	0.884561	0.993444	0.875256	0.533631	0.85699	0.951847	0.999669	-0.182227	0.0936159	-0.00787887	-0.0933643	-0.295731	0.175817	0.0444379	-0.000999049	0.416979	0.609755	0.484419	0.444991	0.338137	0.624737	0.519263	0.486233	0.543159	0.591693
chrII:14373755-14377814:-	acr-20	R06A4.10	WBGene00000059	0.708341	0.793594	0.858449	0.474438	0.915168	0.892855	0.403922	0.851659	-0.20057	-0.154751	0.120453	-0.337229	0.0646397	0.139648	0.411502	0.161644	0.41993	0.444675	0.556359	0.312187	0.588025	0.580751	0.833796	0.588866	0.50761	0.619037
chrIII:6583458-6585564:+	acr-21	F27B3.2	WBGene00000060	0.94044	0.981313	0.622284	0.866947	0.889162	0.902693	0.389353	NA	-0.047889	0.016105	0.264134	-0.0967182	-0.0817063	0.124717	0.404456	-0.040627	0.416784	0.460056	0.588212	0.356205	0.376835	0.449345	0.742843	0.317809	0.385645	0.493346
chrX:7503778-7506588:-	lgc-11	F48E3.7	WBGene00000061	NA	NA	0.190386	0.602605	0.998647	0.930349	0.737775	NA	0.10665	0.197353	0.561742	-0.239756	-0.000691986	-0.0933129	-0.189601	-0.0122214	0.387987	0.455519	0.789401	0.150343	0.296418	0.244412	0.175769	0.289232	0.330771	0.337188
chrV:3651647-3659486:-	acr-23	F59B1.9	WBGene00000062	NA	NA	0.948285	0.553091	0.620694	NA	0.987565	NA	-0.0884632	0.256377	-0.0408632	-0.252518	-0.218053	-0.0147899	-0.00811288	-0.0660572	0.162073	0.341055	0.163691	0.0853056	0.107971	0.174515	0.18333	0.150265	0.209728	0.222001
chrV:11079149-11082479:+	act-1	T04C12.6	WBGene00000063	0.998595	0.494964	0.494929	0.287373	0.000148199	0.827391	0.43336	0.398261	0.000399109	-0.0916362	0.0778309	0.124991	0.351876	-0.0447202	-0.0853961	-0.106881	702.243	648.874	914.242	716.723	860.13	838.906	815.292	803.1	965.503	764.734
chrV:11076719-11078150:-	act-2	T04C12.5	WBGene00000064	0.267277	0.280389	0.185948	0.000263562	5.28718e-05	0.462485	0.910819	0.18844	0.126935	0.126913	-0.132889	0.335343	0.359845	0.103539	-0.0179632	0.146035	693.118	683.285	663.328	750.142	780.637	783.083	719.078	806.799	812.214	690.362
chrV:11071666-11074480:-	act-3	T04C12.4	WBGene00000065	0.688767	0.82856	0.464267	0.0850805	6.1354e-07	0.933302	0.563883	0.596215	0.057704	-0.0356698	0.0785943	0.186433	0.454429	-0.020007	-0.0644265	-0.0746495	664.692	613.786	860.587	680.318	840.509	803.098	778.479	772.924	908.41	695.102
chrX:4960522-4964385:+	act-4	M03F4.2	WBGene00000066	0.75962	0.669833	0.0324929	0.537579	1.63345e-05	0.0317954	0.00119516	0.00478925	0.0524942	0.0729166	0.219103	0.0924478	0.457737	0.236777	0.307331	0.281633	694.507	695.133	767.01	667.972	884.912	776.555	816.146	801.5	733.121	728.847
chrIII:13604238-13605966:-	act-5	T25C8.2	WBGene00000067	0.0807251	0.194186	7.5765e-05	0.846402	2.49212e-10	0.125179	0.317792	0.248974	0.239062	-0.192129	0.458376	0.0378315	0.705898	-0.234527	-0.14864	-0.188362	372.282	269.879	476.995	301.147	496.383	291.403	309.801	301.205	384.076	341.897
chrIII:4722177-4730835:+	acy-1	F17C8.1	WBGene00000068	0.0692837	0.658771	0.264981	0.0329467	0.311077	0.665844	0.587681	0.88282	-0.335656	-0.110777	0.23115	-0.380264	-0.195003	0.145799	0.131832	0.0599792	4.39516	5.11609	5.9433	3.98205	4.66029	5.59292	5.53055	5.24566	5.59826	6.1232
chrV:5976012-5981496:+	acy-2	C10F3.3	WBGene00000069	0.991132	0.364535	0.735868	0.997816	0.944357	0.783733	0.869038	0.739205	-0.00661032	0.412941	0.194401	-0.0040699	0.0415038	-0.230799	0.105928	-0.243778	0.453378	0.699965	0.777015	0.424611	0.458194	0.496978	0.712315	0.492311	0.711652	0.496542
chrIII:3774875-3786718:-	acy-3	C44F1.5	WBGene00000070	0.152899	0.00198008	0.064349	0.414611	4.33022e-07	0.90933	0.071631	0.152032	0.337762	0.635167	0.41297	0.212949	0.923853	0.065816	0.403222	0.366949	2.90048	3.58385	4.42186	2.46481	4.29481	3.41352	4.38669	4.26812	3.61278	2.44088
chrV:5624707-5630876:-	acy-4	T01C2.1	WBGene00000071	0.0494622	0.583595	0.968747	0.579271	0.414463	0.82951	0.545645	0.872099	-0.440325	-0.161855	0.0185639	-0.152938	-0.200213	-0.122425	0.192627	0.0860718	2.76331	3.37288	3.57636	3.21081	3.17413	3.20292	4.09535	3.77562	3.93977	4.20814
chrX:4854047-4860006:-	add-1	F39C12.2	WBGene00000072	0.677073	0.735227	0.279911	0.202885	0.904246	0.305093	0.837647	0.169607	0.12417	-0.110728	0.296901	-0.312157	-0.0399408	-0.343075	-0.080052	-0.403656	4.75171	3.928	4.93289	3.18142	4.01196	3.02518	3.70135	2.88085	4.38883	4.7132
chrV:12009532-12013586:-	add-2	F57F5.4	WBGene00000073	0.496561	0.299193	0.94614	0.738363	0.935865	0.644821	0.364176	0.882761	0.134582	-0.196984	-0.0249696	-0.0731992	-0.0198586	-0.159506	-0.207253	-0.0625479	14.708	11.42	12.3493	11.8141	12.5758	11.1969	10.7898	12.016	14.0227	14.5339
chrX:13687903-13695721:+	adm-2	C04A11.4	WBGene00000074	5.07919e-06	0.665727	0.256684	0.0132724	9.6176e-07	0.522691	0.736168	0.000221114	0.82405	0.126646	0.233551	0.489997	0.853407	0.187817	0.0910554	0.609169	8.39803	4.92318	6.82029	6.11429	8.1974	6.59587	6.14347	8.96511	6.40464	4.9361
chrX:7794993-7798236:-	adm-4	ZK154.7	WBGene00000075	2.69604e-11	0.815194	0.253879	0.450207	0.085023	0.0226588	0.00736251	0.461793	0.842028	-0.0552564	-0.234802	-0.139401	-0.258042	-0.440184	-0.472692	-0.198218	22.4537	11.6378	9.55929	10.3471	9.74004	8.22082	8.03031	9.82944	12.6661	13.3615
chrI:7773411-7777572:+	adr-1	H15N14.1	WBGene00000079	0.305287	0.00310071	0.719607	0.0249221	0.166463	0.0870842	0.4241	0.0910137	0.125064	0.297478	0.0818084	0.232598	0.149914	0.304918	0.151173	0.291803	32.6116	36.3316	31.7039	32.8625	31.7373	37.2117	33.329	36.8657	33.3382	32.5158
chrIII:7230902-7232820:-	adr-2	T20H4.4	WBGene00000080	0.249863	0.444208	0.00902383	0.621404	9.14292e-06	0.969524	0.0146672	0.776059	-0.131137	-0.097283	-0.338869	-0.0643277	-0.39012	0.0161528	-0.318392	-0.0742739	61.2489	61.9478	44.3435	59.9903	48.7981	57.1225	44.998	53.5552	62.9844	73.181
chrIII:295646-298555:-	ads-1	Y50D7A.7	WBGene00000081	0.191809	0.00872166	0.00325683	0.508095	0.96359	0.0919725	0.18225	0.00234925	-0.150026	-0.267757	0.308266	-0.0849131	0.00796132	-0.216301	-0.161728	-0.323978	88.8014	80.601	131.916	86.9081	94.9467	91.0792	94.6485	84.3966	118.345	107.529
chrX:12678760-12689207:+	adt-1	C02B4.1	WBGene00000082	0.434777	0.73804	3.66034e-06	0.18595	0.515395	0.0186658	0.0501554	0.894019	-0.29921	-0.155489	1.30237	-0.456409	0.241067	0.79158	0.639453	0.0976281	0.747085	0.836217	2.50234	0.606296	1.1324	1.64522	1.44316	0.902611	0.91788	1.05717
chrX:7585539-7595441:+	adt-2	F08C6.1	WBGene00000083	0.41945	0.172527	0.0101026	0.522726	0.019153	0.777377	0.968052	0.0108734	0.112025	-0.176973	0.324541	-0.0915931	0.251726	0.0790363	0.00994243	0.329938	19.8595	15.9652	23.7134	16.0748	20.9639	19.9289	18.9589	23.8056	20.9996	19.9821
chrI:7602307-7608241:+	aex-1	D2030.10	WBGene00000084	0.772876	0.426088	0.919352	0.622669	0.929649	0.381922	0.0754201	0.830281	0.088422	-0.215228	-0.0442251	0.13604	0.0292222	-0.308708	-0.450954	0.108153	5.02361	3.947	4.4325	4.85935	4.59305	3.61219	3.23178	4.98135	5.11399	5.11838
chrX:9650942-9653059:-	aex-2	T14B1.2	WBGene00000085	0.419639	0.736203	0.912054	0.552733	0.379578	0.973358	0.920684	NA	-0.377861	-0.192546	0.080185	-0.28819	-0.385586	0.0449719	0.0727327	0.166662	0.785968	0.986771	0.805161	0.828771	0.75051	0.764186	0.796489	0.903808	0.796335	1.36899
chrX:751210-759731:-	aex-3	C02H7.3	WBGene00000086	0.402723	0.111392	0.0397017	0.843458	0.00137713	0.953596	0.784479	0.626044	0.243132	0.414254	0.484266	0.0714351	0.687757	0.0419755	0.0996392	0.195055	1.98902	2.24066	2.99111	1.62658	2.6711	2.13987	2.23346	2.40157	2.3077	1.79156
chrI:14850059-14855816:-	aex-5	F32A7.6	WBGene00000088	0.757773	0.0939641	0.0231542	0.988825	0.935417	0.781558	0.982976	0.979262	-0.0986797	-0.408952	0.514351	-0.00727067	0.0285029	-0.139083	-0.00956545	-0.0167589	6.41317	4.98339	10.3723	6.42312	6.75229	6.34242	6.98743	6.95483	7.84689	7.52691
chrI:13543083-13545177:-	aex-6	Y87G2A.4	WBGene00000089	0.715781	0.986997	0.217564	0.888701	0.91978	0.92165	0.797493	0.912987	0.146952	-0.00876941	0.412183	0.0630922	-0.0450254	-0.0805233	0.121227	0.0759938	5.52582	4.79118	7.6555	4.81832	4.50865	5.09759	6.04007	5.81285	6.08799	5.33021
chrII:11519435-11526998:-	age-1	B0334.8	WBGene00000090	0.842172	0.943961	0.0110841	0.131346	0.820032	0.480925	0.685489	0.976175	-0.0297268	0.0118265	-0.338521	0.154513	-0.031473	0.149552	-0.078106	0.0111676	35.6814	36.2589	27.5666	37.9361	34.0793	39.0451	33.2009	35.3766	39.1538	39.6838
chrX:5289696-5298008:-	ags-3	F32A6.4	WBGene00000092	0.00120078	0.634666	0.102191	0.423371	0.105563	0.797012	0.384822	0.801082	-0.47351	0.101085	-0.307307	-0.14688	-0.246717	-0.100575	0.184157	0.0905893	9.24944	13.8387	9.50652	10.9514	10.4306	11.0573	13.6058	12.7155	13.271	14.1988
chrIV:13368435-13369393:-	agt-1	Y62E10A.5	WBGene00000093	0.710374	0.53097	0.976873	0.339722	0.221523	0.710391	0.101103	0.947028	-0.0941724	-0.151857	-0.0122245	-0.202843	-0.235238	-0.158959	-0.380331	-0.0353546	29.1001	27.5084	25.7674	25.1274	25.0861	23.0982	19.5216	25.311	29.009	33.9772
chrII:5371789-5373404:-	agt-2	F09E5.13	WBGene00000094	0.080489	0.553429	0.17102	0.926184	0.530317	0.715446	0.586656	0.828965	-0.300282	0.128026	-0.368419	0.0244586	-0.122242	-0.177295	-0.177533	-0.11141	16.0825	21.6804	12.0341	19.0208	17.5143	13.9755	13.9627	14.6963	17.8613	21.7979
chrI:10193916-10196990:-	aha-1	C25A1.11	WBGene00000095	0.447918	0.60578	0.811506	0.975765	0.339517	0.763786	0.580765	0.914782	0.168615	-0.130594	-0.0773973	0.00963401	-0.192694	-0.12974	-0.150923	0.0504415	14.4741	11.4608	10.8177	12.0339	10.6148	10.3999	10.254	11.9126	12.7961	13.9371
chrI:9522570-9531122:+	ahr-1	C41G7.5	WBGene00000096	0.905194	0.82856	0.850038	0.67965	0.473024	0.977252	0.209888	0.991009	-0.0751144	0.131948	0.126441	-0.214396	0.330932	0.0386859	0.566793	0.0153623	0.369768	0.496816	0.529271	0.27102	0.613196	0.470959	0.920745	0.453147	0.491076	0.452677
chrV:14012318-14013629:+	aip-1	F58E10.4	WBGene00000097	0.700795	0.0104445	0.0521604	0.995835	0.00128153	0.568304	0.893404	0.714841	-0.0740454	-0.356345	-0.313694	0.00197011	-0.408017	0.149839	0.036179	0.104804	40.3975	32.5393	28.2634	39.8133	30.4047	39.4751	36.3926	38.2462	39.5523	46.3935
chrV:8221390-8223567:+	air-1	K07C11.2	WBGene00000098	0.404831	0.14828	0.00727336	0.0413866	0.334925	0.665427	0.628115	0.45304	0.0954001	0.152057	-0.269512	0.194661	-0.102237	0.0829026	-0.0681565	-0.11491	149.249	153.372	112.768	149.409	124.164	144.552	129.982	125.778	152.105	152.002
chrI:5937479-5938887:+	air-2	B0207.4	WBGene00000099	0.996534	0.700051	0.000961363	0.201325	0.0528176	0.866522	0.172107	0.864712	-0.000863176	0.0577771	-0.408455	0.145658	-0.196567	0.0535298	-0.196488	-0.0485923	86.2892	88.7879	60.602	89.3322	71.8681	84.1903	70.4773	78.3178	90.4314	94.0523
chrX:9098290-9113562:+	ajm-1	C25A11.4	WBGene00000100	0.0274407	0.455926	0.000113125	0.160932	9.15754e-07	0.529988	0.213726	0.414743	0.307747	0.133555	0.573474	0.21192	0.593689	0.167681	0.226315	0.192298	15.3385	13.3614	21.0728	13.3729	17.9953	15.7045	16.3917	15.9925	15.514	13.3946
chrII:7472685-7478914:-	aka-1	D1022.7	WBGene00000101	0.257498	0.249927	0.0468756	0.0892161	0.86316	0.32471	0.727866	0.886052	0.10971	0.11341	-0.238468	0.149984	-0.0219757	0.161524	0.0602414	0.037878	114.824	113.7	85.5935	110.289	100.115	113.626	105.766	104.103	113.049	115.806
chrV:10248882-10252870:+	akt-1	C12D8.10	WBGene00000102	0.1407	0.183067	0.0119652	0.00795108	0.354657	0.00504046	0.129572	0.732623	0.158883	0.149748	-0.287379	0.254547	0.103428	0.326883	0.187703	0.074335	70.5167	69.2199	55.417	70.433	64.8395	85.633	77.6011	71.6193	75.7992	68.6739
chrX:14147631-14152001:+	akt-2	F28H6.1	WBGene00000103	0.0886656	0.0614452	0.947586	0.0678004	0.0894586	0.996603	0.716073	0.915072	0.301173	-0.339884	0.0246626	-0.323667	-0.288068	-0.00369311	0.102149	-0.0476248	12.7453	7.8821	9.41701	7.54821	7.93557	9.24852	9.9726	8.93909	10.319	11.1587
chrX:13949073-13956187:+	alg-1	F48F7.1	WBGene00000105	2.31908e-07	0.131981	0.107951	0.00422365	2.73841e-14	0.955314	0.503388	0.929029	0.592164	0.216857	0.280027	0.355287	0.818169	-0.0278813	-0.141665	0.035113	13.0953	9.89043	11.641	10.3371	14.7042	9.31379	8.57899	9.74565	10.6016	9.34381
chrII:873183-878961:+	alg-2	T07D3.7	WBGene00000106	5.83392e-12	4.90354e-20	0.900572	2.29042e-25	9.87685e-24	0.594536	4.39764e-05	0.12	0.908559	1.18135	0.0411181	1.32413	1.26391	0.17161	0.68262	0.333597	16.0349	19.2485	11.3559	20.1875	19.7885	12.4842	18.1672	14.0653	12.2842	9.03506
chrIII:5077727-5080636:+	alh-1	F54D8.3	WBGene00000107	0.00816437	0.0157375	0.482305	0.000624276	0.105048	0.943344	0.549502	0.856203	-0.221898	-0.20806	-0.0943246	-0.275088	-0.141826	-0.0221206	0.0818489	0.0407437	302.459	301.324	283.735	272.261	306.032	298.588	321.273	312.084	338.254	384.977
chrV:1644169-1647728:+	alh-2	K04F1.15	WBGene00000108	NA	NA	NA	NA	NA	NA	NA	NA	-0.0456346	0.00498145	-0.0441378	-0.090118	-0.0624547	-0.0414943	-0.0373148	0.0558062	0.0188326	0.040518	0.0159325	0	0.012114	0.0184296	0.0195092	0.0679519	0.0431119	0.0423207
chrIV:11022582-11025851:+	alh-3	F36H1.6	WBGene00000109	0.144248	0.00607605	0.951154	0.00284758	0.866798	0.879628	0.627988	0.950173	-0.141439	-0.239279	0.0139454	-0.25316	0.0223694	-0.0444911	-0.0784472	-0.0182097	76.8277	70.7985	75.1705	66.3671	82.4335	72.1367	70.4177	73.4787	83.0315	92.4318
chrV:6427194-6429910:-	alh-4	T05H4.13	WBGene00000110	0.312887	0.962818	3.20141e-05	0.0275707	0.00113001	0.225933	0.125453	0.0292566	0.12087	-0.00865979	0.409385	0.224393	0.302642	0.17201	0.17885	0.248576	69.8684	62.94	91.6805	70.1985	75.9398	77.5112	77.9015	81.8309	76.5765	69.884
chrV:1996108-1999580:-	alh-5	T08B1.3	WBGene00000111	0.297241	0.594644	0.987268	0.691659	0.235519	0.902693	0.0757099	0.862287	-0.237925	0.141444	0.00763886	0.104223	0.241668	0.071193	0.407158	-0.0845128	8.83858	11.5717	9.79109	10.6445	12.0671	10.3038	13.2174	9.13895	10.8606	11.4989
chrII:1306247-1310140:-	alh-6	F56D12.1	WBGene00000112	4.29797e-06	0.0342306	0.00270076	0.00285204	0.835849	0.282871	0.308823	0.994123	-0.407984	-0.213432	-0.39179	-0.278745	0.0297948	-0.199146	-0.161982	0.00372135	81.9448	92.7224	87.4659	83.936	106.685	100.366	103.067	115.988	129.043	119.004
chrII:13485722-13491716:-	alh-7	F45H10.1	WBGene00000113	0.98697	0.0322771	0.129298	0.167161	0.610946	0.956568	0.984011	0.15077	0.00325382	-0.26938	-0.294217	0.181393	-0.0777362	-0.029848	0.00659837	-0.307673	33.6397	27.328	27.7105	35.6895	30.3672	33.6127	34.5406	27.4402	38.3433	36.5587
chrII:11728886-11731163:+	alh-8	F13D12.4	WBGene00000114	1.00412e-05	0.0125132	0.0026744	0.260137	0.728764	0.523977	0.177875	0.870552	-0.337434	-0.209231	-0.332652	-0.107269	-0.0398546	-0.120827	-0.171626	0.0412867	401.328	433.167	390.872	440.724	472.766	454.108	438.071	509.311	551.725	553.885
chrIII:5855994-5859141:+	alh-9	F01F1.6	WBGene00000115	6.08892e-09	5.47265e-13	6.4762e-12	8.96858e-08	0.0736344	0.0404782	3.73769e-05	0.954465	-0.484509	-0.592466	-0.689164	-0.449383	-0.169012	-0.266401	-0.440362	0.0167864	171.247	156.658	140.883	164.109	204.515	190.144	168.073	232.33	256.104	262.343
chrX:7140459-7143598:-	alh-10	C54D1.4	WBGene00000116	0.00771192	0.743273	0.00281523	0.0416075	0.0802508	0.892416	0.950177	0.592237	-0.43452	-0.0813682	-0.568807	-0.344268	-0.286897	-0.067606	0.0229316	0.172753	11.7502	15.0074	9.74832	11.7529	12.5203	14.1839	15.1532	16.9087	16.6101	17.5752
chrIII:774319-778150:-	alh-11	F42G9.5	WBGene00000117	0.247921	0.888305	0.122837	0.248269	8.83516e-06	0.0413226	0.0404088	0.15861	0.151939	-0.0274593	0.214574	0.149794	0.443005	0.290353	0.26979	0.218539	27.387	23.7978	29.5047	25.5417	32.1747	31.1176	30.6757	29.5748	28.2356	26.7816
chrIII:7453947-7455917:+	alh-12	Y69F12A.2	WBGene00000118	1.41944e-11	0.0289852	0.0117346	1.12141e-06	0.000938356	0.00193818	0.909078	0.176157	-0.591139	-0.222774	-0.315765	-0.43822	-0.300251	-0.3898	-0.0256225	-0.2085	54.0862	69.2847	67.436	56.3172	63.5113	63.9887	82.8984	72.7725	94.1606	89.3954
chrIV:9108916-9109736:+	aly-1	C01F6.5	WBGene00000120	0.436298	0.569655	0.369839	0.0659023	0.00087251	0.872457	0.420222	0.960415	0.163604	0.132972	-0.243752	0.322602	0.509211	0.0874763	-0.223085	0.0285404	31.4558	30.3474	19.2523	33.0026	38.6726	24.6412	19.5356	23.6158	25.7946	30.4119
chrIV:9147452-9148568:+	aly-2	F23B2.6	WBGene00000121	0.0436103	0.0458416	0.000232617	6.69191e-07	0.000967439	0.988973	0.0241617	0.658689	0.219086	0.22037	-0.447233	0.469498	0.319015	-0.00619325	-0.295091	-0.101347	223.31	220.433	177.256	248.956	229.137	242.593	197.541	226.784	271.878	208.331
chrIV:12123133-12124788:+	aly-3	M18.7	WBGene00000122	0.723294	0.281953	0.00104675	0.0387612	0.0163548	0.983207	0.132073	0.805836	-0.0486459	0.124047	-0.325694	0.202717	-0.223234	0.00779302	-0.170575	-0.0532264	103.791	115.627	83.581	115.766	87.7744	105.745	93.2599	101.297	117.315	117.008
chrIV:4248063-4258166:+	ama-1	F36A4.7	WBGene00000123	8.04065e-07	4.90104e-09	0.237091	1.18282e-13	1.42813e-33	2.76267e-06	3.22486e-06	2.15341e-20	0.513423	0.601881	0.167402	0.742472	1.15967	0.530329	0.515868	0.952932	51.0316	53.5755	51.2905	56.0748	77.178	66.3547	65.6925	89.5884	50.781	38.6114
chrX:4571422-4573888:+	amt-1	C05E11.4	WBGene00000133	8.87775e-08	4.13826e-05	0.985302	7.48897e-06	0.276235	0.159282	2.87488e-08	0.653234	-0.979984	-0.777129	0.0112006	-0.829698	-0.235911	-0.505854	-1.4297	0.226169	5.85385	6.73979	12.9478	6.15148	9.79273	8.50568	3.8948	15.3914	14.3289	13.3114
chrIV:13042367-13046834:+	amt-2	F49E11.3	WBGene00000134	0.0473636	0.838533	0.0554614	0.885598	0.757988	0.739812	0.789365	0.372939	0.763928	0.121107	0.793435	-0.0826377	0.159888	-0.278788	-0.167803	-0.506192	0.847619	0.312263	1.36373	0.182605	0.328495	0.364566	0.419407	0.230317	0.600851	0.2663
chrII:8363145-8369108:-	amt-3	M195.3	WBGene00000135	0.695116	0.98797	0.973673	0.210892	0.980251	0.916856	0.893974	0.821291	0.189083	0.00948831	-0.0244027	-0.492943	0.0145905	-0.106505	0.0873164	-0.180354	1.17963	0.98219	0.940537	0.55403	0.953901	0.866979	1.05245	0.799728	1.07569	1.07433
chrX:4565276-4569367:+	amt-4	C05E11.5	WBGene00000136	0.185515	0.00947182	0.826185	0.901715	0.554946	0.0236733	0.351253	0.00248021	0.184597	-0.33075	-0.0547156	0.0247741	-0.091466	-0.375622	-0.171854	-0.45662	27.4186	18.741	23.7497	22.852	21.5398	18.8572	21.8322	17.7688	27.5509	26.1848
chrIII:3822385-3826243:+	amx-1	R13G10.2	WBGene00000137	0.398539	0.808595	0.356424	0.239238	0.318555	0.464034	0.145795	0.906	0.159926	0.0596188	-0.216903	0.20642	0.171324	0.219286	0.303983	0.052492	10.1985	9.35912	7.68075	9.84411	9.83211	10.5844	11.2854	9.37035	10.0618	9.89354
chrI:12759576-12764950:-	amx-2	B0019.1	WBGene00000138	0.867355	0.663622	8.22466e-06	0.865055	0.00635701	0.576507	0.0911371	0.0723963	-0.0686973	0.159726	0.940902	-0.0675272	0.642576	0.22916	0.423854	0.472493	3.2551	3.86093	8.44466	3.04121	5.43153	4.92372	5.70164	5.91268	4.58223	3.74253
chrV:20898906-20903410:-	amx-3	F25C8.2	WBGene00000139	0.0310893	0.50882	0.136993	0.721302	0.140561	0.759714	0.412488	0.931485	-0.562322	-0.221867	-0.50102	-0.124652	-0.384804	-0.199819	-0.312473	-0.0630429	4.09348	5.31214	3.74393	5.40649	4.52289	4.82804	4.40475	5.43726	6.39334	6.97919
chrI:4321096-4359106:+	anc-1	ZK973.6	WBGene00000140	0.00055002	0.208822	0.000559443	0.00037049	3.72868e-16	0.0809007	0.00503236	0.000690871	0.385947	0.171603	0.504114	0.394255	0.823109	0.315844	0.419548	0.501534	101.116	85.6103	140.712	95.1075	132.022	122.848	132.386	140.447	109.107	83.7213
chrV:10127469-10130270:-	aos-1	C08B6.9	WBGene00000142	0.560857	0.628133	0.00209928	0.600005	0.0576232	0.80014	0.324282	0.880537	-0.0756312	-0.0679156	-0.377906	-0.0677212	-0.186149	0.0726074	-0.149091	-0.0433187	98.1689	97.4667	71.1703	92.1881	86.8486	98.0686	83.7604	90.3003	103.89	112.809
chrIII:8080547-8083630:+	apc-2	K06H7.6	WBGene00000143	0.773568	0.00289823	0.00380283	0.826155	0.00049807	0.776865	7.02348e-10	0.91506	-0.0430132	-0.299165	-0.37644	0.033453	-0.325755	-0.0823895	-0.723815	0.0333463	50.0314	41.2317	34.5769	49.3092	39.1924	42.635	26.9703	46.3126	50.4581	56.1861
chrV:10425339-10426363:-	apc-10	F15H10.3	WBGene00000144	0.976683	0.73266	0.391938	0.00114487	0.257388	0.922982	0.470698	0.937844	-0.00825345	0.0795422	-0.18723	-0.492214	-0.191669	-0.0466901	-0.16267	-0.0330898	35.1661	36.9726	26.7041	23.0965	29.4491	29.5958	27.1912	29.8901	34.1514	38.5443
chrIII:4593737-4594394:-	apc-11	F35G12.9	WBGene00000145	0.561236	0.0115591	0.0723658	0.960219	0.578916	0.985767	0.809992	0.467972	0.107827	0.35426	-0.341588	0.0120998	-0.0979058	0.0114274	-0.0686803	-0.198187	63.5649	74.8801	42.3838	55.5197	52.4422	54.9489	51.7976	47.1106	60.7422	64.0701
chrV:11675924-11685259:+	ape-1	F46F3.4	WBGene00000146	0.215865	2.64765e-06	0.39769	0.00321887	0.123917	0.0873367	0.0199614	0.680307	0.12941	0.394689	-0.122326	0.260304	0.146001	0.232966	0.270078	0.0867602	67.1065	79.8	55.054	68.7175	64.9238	70.7973	72.6969	63.8381	66.96	66.7354
chrI:9232060-9233555:-	aph-1	VF36H2L.1	WBGene00000147	0.81002	0.669833	0.309644	0.719995	0.156242	0.190627	0.96065	0.512531	0.0537312	0.0909975	-0.211594	0.0734439	-0.218727	0.289316	0.0161944	0.178042	31.4105	31.8671	21.3296	29.715	24.6878	30.6886	25.2133	28.3592	27.7941	32.9146
chrI:10340988-10345642:+	aph-2	ZC434.6	WBGene00000148	0.780094	0.936292	0.0802102	0.545805	0.119244	0.769233	0.576507	0.85986	-0.0466564	-0.0164141	-0.248512	0.0870565	-0.181421	0.0843138	-0.100981	0.0516292	32.5721	32.8542	25.0104	33.4168	28.3131	31.678	27.7911	30.9823	33.3119	36.6743
chrX:5112403-5116835:-	apl-1	C42D8.8	WBGene00000149	0.153435	0.0941973	0.0347877	0.000769542	0.96493	0.729326	0.775929	0.704015	-0.153067	-0.1769	0.214033	-0.309258	-0.00733353	-0.0709432	0.0438923	-0.069829	80.401	78.0318	101.679	67.3478	85.205	83.2157	90.1972	83.2476	97.5437	97.5485
chrI:5342181-5344727:-	apm-1	F55A12.7	WBGene00000150	0.893667	0.102407	0.306412	0.303981	0.632424	0.832533	0.682829	0.952115	0.0304329	-0.250461	0.214453	-0.166053	-0.0847366	-0.0883246	-0.105265	0.0266528	22.2172	17.9303	25.5987	18.0277	19.5603	20.5559	20.2695	22.3339	24.4133	23.6799
chrII:8047512-8049053:+	apn-1	T05H10.2	WBGene00000151	0.0178704	0.143711	0.0536834	5.78868e-05	0.0130619	0.750158	0.631576	0.954696	0.296944	0.20624	-0.276465	0.462182	0.294818	0.0912072	-0.0913776	-0.0195636	44.8421	41.4659	34.5207	47.0864	42.8121	44.8442	39.3898	41.4724	46.8951	39.5251
chrI:4964668-4967330:-	app-1	W03G9.4	WBGene00000155	0.834259	0.239464	0.10452	0.365459	0.524299	0.973513	0.00384428	0.966839	-0.0285958	-0.121144	-0.222098	0.0940562	-0.068815	0.014138	-0.355586	-0.0145909	112.303	103.853	91.7588	114.378	104.41	108.577	83.4486	106.364	119.886	124.829
chrI:8050038-8055469:+	2001-04-01	K04G2.8	WBGene00000156	0.407322	0.00121351	0.0437109	0.00515197	0.844755	0.268116	0.640994	0.921926	0.0825426	0.252773	-0.270449	0.220133	-0.0237637	0.195091	0.0843473	-0.0302288	61.9646	68.9072	46.7528	63.7406	54.999	65.1388	60.2005	55.4766	63.2327	63.7023
chrX:4458247-4459242:+	aps-2	F02E8.3	WBGene00000157	0.381784	0.900743	0.238931	0.015874	0.185174	0.875604	1.35818e-06	0.072526	0.197713	0.0396012	-0.290433	-0.46108	-0.263711	-0.0830958	-0.966908	-0.433638	34.639	30.4178	23.0418	19.8896	23.5531	26.9162	13.7184	20.6822	31.9512	32.6092
chrI:14406016-14417916:+	apg-1	Y105E8A.9	WBGene00000158	0.43848	0.963209	0.12385	0.971566	0.580336	0.997284	0.525484	0.902059	-0.0968356	0.00849038	-0.205387	-0.00615689	0.0697093	-0.00190666	-0.101999	-0.035179	45.8449	48.741	39.8154	45.6211	49.2908	46.0043	42.8448	44.915	51.3713	53.4617
chrV:6017953-6018867:+	aps-1	F29G9.3	WBGene00000159	0.113032	0.18343	0.0262364	0.253742	0.000582237	0.772906	0.0199614	0.989617	-0.208473	-0.185086	-0.313118	-0.157698	-0.381082	-0.0862442	-0.324925	0.00569353	91.339	91.7156	74.1044	88.458	77.2542	87.191	73.4992	93.123	103.46	115.422
chrIII:2583965-2597025:-	apb-1	Y71H2B.10	WBGene00000160	0.0645266	0.104874	0.452227	1.61574e-05	6.17937e-05	0.29615	0.482649	0.16138	0.18574	0.170248	-0.124432	0.376002	0.34264	0.186957	-0.116322	0.218944	42.5283	41.5166	38.9886	45.4109	45.4143	48.6623	39.2191	49.7832	47.5152	40.6418
chrX:9336760-9342892:+	apa-2	T20B5.1	WBGene00000161	4.76675e-19	0.674856	0.380825	0.00539889	0.0856693	0.921587	0.0580332	0.97957	0.821615	-0.0674871	-0.141329	0.295276	0.189251	-0.0354476	-0.259474	0.00939587	34.9347	18.3801	18.8697	22.5096	21.3695	20.3302	17.3489	21.0084	23.283	21.284
chrII:3532529-3546434:-	apd-3	W09G10.4	WBGene00000162	7.28455e-07	5.28883e-05	0.0951962	4.06637e-07	1.94636e-10	0.0114033	0.0539946	0.00335698	0.488361	0.413951	0.254161	0.498505	0.59583	0.37853	0.284977	0.411472	25.1532	23.5599	22.7274	23.6568	25.95	24.8295	23.2342	25.4282	21.1223	19.387
chrI:7853745-7857829:+	apb-3	R11A5.1	WBGene00000163	0.0545677	0.000367187	0.410709	0.108213	0.052691	0.264996	0.463829	0.905591	0.180217	0.304073	-0.142852	0.15424	0.172177	0.209049	0.128361	-0.0382093	50.7262	54.636	40.2072	46.5206	48.2329	51.7026	48.8065	43.3208	49.6666	48.6779
chrX:954932-957760:+	apm-3	F53H8.1	WBGene00000164	3.82429e-10	0.958088	0.868144	0.0308358	0.00857731	0.415467	0.0296418	0.537205	0.838628	-0.015236	-0.0571463	0.338506	-0.392659	-0.249161	-0.454245	-0.200173	28.2316	15.0543	12.7081	18.4073	11.0948	11.0321	9.44435	11.4356	14.7938	16.7979
chrI:1155346-1156023:-	aps-3	Y48G8AL.14	WBGene00000165	0.0155367	0.326899	0.00663155	0.736103	2.17309e-16	0.212281	0.00040179	0.251529	-0.271693	-0.134296	-0.527166	-0.052666	-0.789578	-0.320475	-0.655675	-0.294116	95.4232	103.832	69.4759	104.151	63.1994	81.0168	63.1937	82.6874	114.642	126.002
chrX:11068461-11071859:+	apt-9	W04G3.4	WBGene00000166	0.779524	0.899833	0.714544	0.481409	0.852273	0.86554	0.784905	0.729582	-0.155483	0.0805087	0.215731	-0.331945	-0.105719	-0.165373	0.168454	-0.259943	0.589059	0.770338	0.9036	0.437286	0.599146	0.58727	0.858257	0.512869	0.789405	0.773796
chrV:3210189-3223128:+	apx-1	K08D9.3	WBGene00000168	1.27938e-07	0.0093861	0.0762158	6.54539e-17	6.38592e-27	1.49324e-10	8.22277e-08	3.01895e-05	0.999252	0.555063	0.347138	1.5045	1.87192	1.0158	0.867704	0.702944	10.1806	7.18121	10.3754	13.8593	18.6118	16.8693	15.1586	13.4456	8.93246	5.1687
chrII:7235793-7238308:-	aqp-1	F32A5.5	WBGene00000169	1.56551e-08	5.85983e-05	0.0321789	2.68493e-05	0.993767	0.357737	0.858895	0.149929	-0.591933	-0.440122	0.318598	-0.450837	-0.0014503	-0.19581	0.043772	-0.254183	46.2262	50.8275	85.5167	47.7438	67.2313	59.208	70.2684	56.7395	75.9641	76.687
chrII:9258853-9261934:-	aqp-2	C01G6.1	WBGene00000170	0.264698	0.849168	0.00967995	0.00813245	0.000820437	0.639533	0.250788	0.00852987	0.206914	0.0503177	0.419265	0.410766	0.48259	0.14158	0.217702	-0.446255	19.0906	16.8164	31.5716	20.6944	22.2724	25.841	27.2927	16.8482	25.9983	17.8857
chrIV:10961214-10963794:-	aqp-3	Y69E1A.7	WBGene00000171	0.530853	0.751739	0.930841	0.984754	0.927687	0.960117	0.444542	0.907178	-0.307286	-0.181973	-0.065648	0.0148697	0.0550964	0.0632326	0.384387	0.108804	0.334768	0.420049	0.59444	0.546511	0.590808	0.713632	1.08629	0.764312	0.732414	0.627566
chrV:9737567-9739676:+	aqp-4	F40F9.9	WBGene00000172	0.737051	0.210469	0.000205086	0.587138	0.933279	0.946856	0.974931	0.862967	0.0965444	-0.296877	0.745193	-0.143447	0.0269608	0.0452838	0.013845	0.083422	15.8833	11.6605	19.8003	12.3659	14.4098	11.6971	11.4367	12.0661	12.6222	16.0959
chrV:10491720-10493245:+	aqp-5	C35A5.1	WBGene00000173	NA	NA	NA	NA	NA	NA	NA	NA	-0.134126	-0.078337	0.30053	-0.176982	-0.184387	0.152068	0.161813	0.0601911	0.0882978	0.124271	0.285198	0.0564593	0.0580511	0.169294	0.178003	0.104224	0.0689443	0.197342
chrV:10648425-10651800:+	aqp-6	C32C4.2	WBGene00000174	0.617713	0.187822	0.844652	0.28343	0.919782	0.745947	0.857487	NA	-0.257377	-0.574669	0.130816	-0.471136	-0.0608941	0.273119	0.120564	0.166724	0.725738	0.424581	0.860298	0.484995	0.892151	1.03268	0.845362	0.904252	0.785466	1.11377
chrX:3025052-3026961:+	aqp-7	M02F4.8	WBGene00000175	7.80122e-05	0.0817698	0.885763	0.00955157	0.217399	0.0190707	0.122386	6.82419e-05	-0.34376	-0.175909	-0.0298982	-0.238196	-0.124253	-0.300978	-0.199882	-0.442493	159.449	177.09	212.362	160.605	177.928	175.229	188.256	158.503	241.961	221.233
chrX:4702935-4704939:-	aqp-8	K02G10.7	WBGene00000176	0.871715	0.00584	3.87622e-07	0.386577	0.892743	0.78073	0.0440438	0.782763	-0.0349958	-0.372821	0.786208	0.1386	0.0278792	-0.107871	-0.367443	-0.0982164	34.0439	26.3639	77.9797	36.0144	34.047	40.6517	33.6225	40.9306	49.0829	38.0132
chrI:9605923-9608929:+	aqp-9	K07A1.16	WBGene00000177	0.894399	0.101454	0.73819	0.128578	0.206145	0.921587	0.36977	0.914213	-0.0611205	-0.510188	-0.153481	-0.464615	-0.377813	-0.0818019	-0.332213	0.0758556	7.10124	4.82034	5.9909	4.7641	5.23623	6.37321	5.14546	7.25467	7.60637	8.12822
chrII:9768392-9769788:-	aqp-10	ZK1321.3	WBGene00000178	0.0260874	0.694919	0.931257	0.0411328	1.54314e-06	0.922202	0.827343	0.905209	0.301306	-0.0781768	0.0267454	0.279478	0.560106	-0.0442518	-0.058368	-0.0458069	46.5912	35.0405	52.7727	42.8295	53.571	50.1145	49.6149	50.1029	57.7304	40.8996
chrIII:13673177-13674644:+	aqp-11	ZK525.2	WBGene00000179	0.191826	0.356798	0.654352	0.0438928	0.123209	0.148284	0.553006	0.358556	-0.175723	-0.136548	-0.0877486	-0.24774	-0.188166	-0.246023	-0.10834	-0.177324	54.4759	55.304	57.5542	48.3515	51.6359	51.4475	56.721	53.9941	68.3608	67.2302
chrII:9674919-9677146:+	arc-1	ZK1320.6	WBGene00000180	0.975334	0.0346344	0.525592	0.194419	0.4355	0.626697	0.191715	0.719082	0.00927769	-0.372312	-0.162087	-0.242764	-0.150983	-0.16887	-0.283807	-0.129562	12.6275	9.42762	10.6677	9.81464	10.743	10.6472	9.74728	10.9231	13.412	13.6626
chrIV:11131258-11133764:+	ard-1	F01G4.2	WBGene00000181	0.0143216	0.0296875	0.00793483	0.135475	0.0585277	0.804807	0.775782	0.840723	-0.21965	-0.201993	-0.320884	-0.145192	-0.169212	-0.0686616	-0.0540349	-0.0526434	197.661	197.435	165.817	194.601	195.855	198.317	200.428	200.628	232.291	251.266
chrIII:5716070-5717538:+	arf-1.2	B0336.2	WBGene00000182	0.856863	0.958088	0.132054	0.132159	0.251653	0.952906	0.252398	0.170804	-0.0327654	0.0109175	-0.199335	0.183733	0.141983	-0.0223941	-0.160141	-0.203129	137.06	139.592	141.11	149.366	148.255	159.923	145.082	140.743	181.32	152.793
chrIV:7982514-7983888:+	arf-3	F57H12.1	WBGene00000183	0.190731	0.129442	0.585772	0.0247637	0.04424	0.82951	0.0535836	0.962901	0.153729	0.176072	-0.0847722	0.235408	0.207286	-0.0574149	-0.227706	-0.0141377	200.891	201.329	185.894	198.735	199.485	189.469	167.991	195.41	220.111	196.3
chrIV:16947094-16949514:+	arf-6	Y116A8C.12	WBGene00000184	0.671717	0.925475	0.440379	0.139846	0.443868	0.973076	0.524035	0.415879	0.111134	0.0311002	-0.22765	0.300394	0.168679	-0.0261185	-0.193663	-0.277646	26.8601	24.9779	24.4814	28.8456	26.7989	28.526	25.1249	23.5472	32.4652	26.9462
chrX:1786902-1788400:+	arg-1	F31A9.3	WBGene00000185	NA	NA	NA	NA	NA	NA	NA	NA	0.254595	0.0991481	0.103241	0	0.160135	0.0647167	-0.047656	-0.0514512	0.16182	0.0579686	0.0946247	0	0.0901002	0.071703	0	0	0.0322739	0
chrIV:12622061-12630999:-	ark-1	C01C7.1	WBGene00000186	1.33558e-08	4.90783e-07	0.835609	7.40586e-10	6.5269e-16	0.000122299	1.60093e-06	0.000484717	0.699192	0.634274	0.0535511	0.752646	0.942512	0.564688	0.662758	0.511614	19.2323	18.1228	15.4431	18.656	21.8798	22.3029	23.9448	21.4716	16.557	12.672
chrII:8581894-8583019:+	arl-1	F54C9.10	WBGene00000187	0.861006	0.917366	0.267904	0.967669	0.189619	0.890336	0.962633	0.69175	0.0397105	-0.0251	-0.20081	-0.00974213	-0.197048	0.0546397	-0.0139189	-0.112711	48.9283	46.1347	38.3469	44.0692	39.4629	46.1294	43.916	40.9176	49.4884	51.7975
chrII:14607137-14607976:+	arl-3	F19H8.3	WBGene00000188	0.829975	0.867635	0.0968787	0.972788	0.782391	0.234915	0.0719632	0.113767	-0.11607	-0.0970642	0.656054	0.0204868	-0.135606	0.583198	0.69739	0.680871	3.78996	3.81262	6.69286	4.04707	3.56426	6.29085	6.9807	6.86483	3.77669	4.62579
chrIII:9823148-9824047:+	arl-5	ZK632.8	WBGene00000189	0.542829	0.941217	0.394748	0.527867	0.943487	0.949825	0.903574	0.78716	0.142731	0.0234991	-0.219019	0.142947	-0.0202702	0.0406134	-0.0446265	-0.113474	29.2481	26.4328	21.1017	27.28	24.8171	25.5901	24.0096	22.8217	27.6991	28.6822
chrIV:7634821-7635696:+	arf-1.1	F45E4.1	WBGene00000190	0.12158	0.79248	1.73189e-05	0.753509	0.00241636	0.446573	0.17472	0.5612	0.612663	-0.151717	1.4964	-0.164633	1.02169	0.455774	0.583582	0.367679	3.508	1.49392	5.8673	1.40179	4.853	2.06231	2.36455	1.85212	1.23455	1.99363
chrIV:14798117-14799278:+	arl-8	Y57G11C.13	WBGene00000192	0.913393	0.486542	0.0103205	0.246878	0.0480169	0.588938	0.182157	0.801894	0.0176463	-0.0901303	-0.332319	0.128855	-0.192063	0.122423	-0.194031	0.0677823	120.544	110.29	79.0576	121.733	99.413	109.287	87.2488	105.133	111.757	129.669
chrIII:4813273-4814778:-	arl-6	C38D4.8	WBGene00000193	NA	NA	0.584342	NA	0.804982	NA	0.89532	NA	-0.283964	-0.310464	-0.248643	-0.150025	-0.114399	-0.17931	0.0766193	-0.323332	0.269882	0.229899	0.340101	0.4196	0.467092	0.438946	0.866809	0.241447	0.814019	0.729189
chrX:950779-954230:+	arr-1	F53H8.2	WBGene00000195	0.825481	0.302531	0.393076	0.958742	0.579303	0.731565	0.00662882	0.655154	0.0567224	-0.211295	-0.212122	0.0149136	-0.115448	-0.141619	-0.53948	-0.158039	13.8499	11.2412	11.5959	12.5452	11.6833	12.2338	9.08128	12.0848	15.1574	14.476
chrII:11460099-11464015:-	aars-1	W02B12.6	WBGene00000196	0.905789	0.755198	0.275176	0.240373	0.0503261	0.764147	0.715014	0.834724	-0.0245507	-0.0602608	-0.192305	0.166547	-0.243356	0.0963852	-0.0814814	0.0673556	19.4011	18.6788	16.1128	20.7503	15.8757	19.8447	17.447	19.4211	20.6399	21.5083
chrI:3983174-3986918:+	aars-2	F28H1.3	WBGene00000197	0.936478	0.0021209	0.723929	0.00160626	0.0469344	0.113815	0.335429	0.375438	-0.011466	0.249274	-0.0782468	0.251668	0.164796	0.279397	0.16848	0.184759	107.771	127.648	99.1431	121.086	116.643	128.164	118.364	119.746	116.974	118.34
chrII:6970626-6972193:-	art-1	C15F1.6	WBGene00000198	0.78943	0.777944	0.31727	0.224487	0.108612	0.847718	0.341353	0.817696	0.0356594	-0.0393574	-0.132345	0.12273	0.146893	-0.0510435	-0.126628	-0.0542262	164.094	153.608	133.052	162.909	169.642	140.888	133.599	140.615	162.953	174.314
chrI:2883498-2893720:-	arx-1	Y71F9AL.16	WBGene00000199	0.997236	0.924813	0.769038	0.638955	0.874412	0.752947	0.975551	0.736098	-0.000761348	-0.017608	-0.0711977	-0.0667435	0.0256153	0.10362	-0.00937235	0.100288	52.3114	51.0048	44.0905	46.6538	50.961	50.0382	46.1055	49.8835	51.7744	57.0082
chrV:10335241-10338332:-	arx-2	K07C5.1	WBGene00000200	0.059042	0.147689	0.612236	5.76014e-05	0.182959	0.0439873	0.279857	0.606043	0.185751	0.153487	-0.0806192	0.347888	0.13249	0.256606	0.143985	0.100146	76.4171	73.7575	65.0031	79.989	70.3822	82.5414	76.2242	73.9025	76.7969	73.0282
chrIII:12052328-12058358:-	arx-3	Y79H2A.6	WBGene00000201	0.362944	0.442863	0.231503	0.466044	0.462865	0.864714	0.365204	0.713054	-0.122428	-0.110342	-0.172609	-0.100706	-0.0969752	-0.0525802	-0.138838	0.0862168	55.8186	55.5796	47.6908	52.9234	54.3352	51.9344	48.8578	57.3161	60.1388	66.3033
chrIII:860188-861289:+	exos-4.2	Y6D11A.1	WBGene00000202	0.374288	0.800065	0.0132804	0.690154	0.0122363	0.680618	0.237932	0.495108	-0.121876	-0.0450173	-0.35308	-0.0620762	-0.270018	-0.111828	-0.192495	-0.15049	75.6001	78.8022	56.7339	73.6299	65.0875	67.4567	63.683	65.6131	81.5327	89.7897
chrIII:12816689-12818006:-	arx-5	Y37D8A.1	WBGene00000203	0.944647	0.384003	0.122993	0.992656	0.237409	0.816807	0.658882	0.572804	-0.0149824	-0.146829	-0.265002	0.00331809	-0.171072	0.083893	-0.0986822	-0.146992	62.8402	56.4002	45.706	59.532	53.7394	58.7626	51.537	49.7451	61.7138	69.1827
chrIII:4878622-4879661:+	arx-6	C35D10.16	WBGene00000204	0.934767	0.793495	0.416244	0.372956	0.459275	0.969044	0.597157	0.796027	0.0213859	0.0622978	-0.157725	0.161259	-0.134029	0.019464	-0.111611	-0.0820124	50.408	51.2702	42.5548	52.0625	43.0681	48.3451	44.0094	44.9603	53.1928	54.0463
chrI:3069234-3070142:-	arx-7	M01B12.3	WBGene00000205	0.955982	0.903872	0.632315	0.809398	0.277613	0.709014	0.227223	0.75534	0.0144189	-0.0313741	-0.117714	-0.0553626	-0.185255	-0.130283	-0.242873	-0.106184	44.7525	42.6867	37.8602	39.7697	37.0359	37.4689	34.5569	38.1835	45.998	48.2466
chrIII:4594509-4595912:-	asb-1	F35G12.10	WBGene00000206	0.0611295	2.71236e-13	0.626412	0.00461756	0.221025	0.628906	0.00467978	0.715873	0.166891	0.540215	-0.0687957	0.233092	0.112584	0.088438	0.275117	-0.0687393	259.067	332.379	223.866	253.452	238.478	250.15	285.269	223.926	262.124	251.012
chrX:4469718-4471455:+	asb-2	F02E8.1	WBGene00000207	0.351891	0.414648	0.144572	0.884161	0.278914	0.0135786	0.204308	0.971251	0.0995166	-0.0920916	-0.152388	-0.0203618	0.106611	-0.249007	-0.136263	-0.00904929	289.662	249.869	283.54	248.919	278.347	264.925	286.792	313.641	352.057	294.249
chrII:15039326-15048831:+	asc-1	Y53F4B.15	WBGene00000208	0.368413	0.273418	0.771458	0.4946	0.243829	0.921333	0.560773	0.446139	0.144987	0.174572	-0.0748821	0.114679	0.16778	0.045013	-0.129012	0.187927	32.0389	32.2779	26.5162	29.2967	31.1364	28.9481	25.4918	32.0729	31.2226	31.456
chrI:8692940-8693463:+	asg-1	K07A12.3	WBGene00000209	0.571603	0.279797	0.733696	0.382301	1.2709e-05	0.400799	0.496858	0.684679	-0.0749277	0.129193	-0.0578334	-0.105058	-0.392342	-0.140612	-0.0980501	-0.0829077	329.052	374.755	286.937	301.099	251.505	270.697	278.918	281.977	333.414	377.88
chrX:6841218-6842164:+	asg-2	C53B7.4	WBGene00000210	0.312444	0.0399929	0.0403898	0.00747357	0.0144004	0.000241729	0.00421985	0.162006	-0.119143	-0.214581	-0.248771	-0.261711	-0.233314	-0.417617	-0.326831	-0.199703	228.69	211.004	222.726	193.4	201.774	197.688	210.734	230.642	296.303	270.947
chrII:6910028-6912653:+	asm-1	B0252.2	WBGene00000211	0.850006	0.271127	0.389428	0.965432	0.3655	0.890091	0.867461	0.903603	-0.0673461	-0.298529	-0.269921	-0.0165549	-0.231377	-0.0896946	0.0712685	-0.071098	6.27795	5.19101	5.57433	6.1077	5.295	6.42988	7.28299	6.52026	7.69483	7.20029
chrX:11321013-11324187:-	asm-2	ZK455.4	WBGene00000212	0.118312	4.72862e-09	0.224707	0.0122007	0.0984827	0.836771	0.512602	0.0530032	-0.276929	-0.884674	0.300305	-0.4064	0.267635	-0.105027	-0.185776	-0.464631	12.7261	8.03964	22.093	10.8087	18.0516	16.3034	15.3269	12.4035	19.6696	16.9533
chrIV:520210-523757:-	asm-3	W03G1.7	WBGene00000213	2.69787e-32	3.62244e-19	0.756316	1.9747e-33	3.25629e-16	0.352122	0.191715	0.0875694	-1.90406	-1.41796	-0.18827	-1.95998	1.13715	0.531454	0.575843	0.765591	3.45215	4.953	7.10304	3.06633	30.9463	29.7244	31.8017	41.8366	12.6691	15.5652
chrV:19049094-19050796:-	asp-1	Y39B6A.20	WBGene00000214	9.42558e-13	0.575754	2.00586e-24	1.397e-06	1.81963e-46	0.909846	0.00122605	0.675539	0.583717	0.0724349	1.01101	0.409773	1.11798	-0.0366053	0.365573	0.090335	1609.32	1106.58	2691.45	1330.06	2241.04	1280.28	1702.96	1400.91	1465.57	1162.32
chrV:9199657-9205105:+	asp-2	T18H9.2	WBGene00000215	0.000227892	1.13905e-15	0.623234	0.00335915	7.57206e-13	0.178735	0.641531	0.400352	-0.243462	-0.490654	0.0798604	-0.19914	-0.43465	-0.198839	-0.0756104	-0.142082	299.108	248.376	328.349	288.24	250.241	269.518	294.117	280.588	346.102	386.257
chrX:6791025-6792676:+	asp-3	H22K11.1	WBGene00000216	0.00039189	4.71754e-07	1.28038e-19	0.981734	0.091896	0.113342	0.923858	0.0265612	0.303275	-0.417658	0.733417	-0.00396733	0.156423	-0.185278	0.0169061	-0.227379	599.77	356.165	749.251	451.539	517.338	392.598	452.621	381.138	498.871	527.8
chrX:13218908-13221400:-	asp-4	R12H7.2	WBGene00000217	1.32381e-07	0.304794	0.00293307	0.111509	3.11372e-17	0.376004	0.0327826	0.0025918	-0.414271	0.1078	-0.307349	-0.148426	-0.628547	-0.138816	0.230731	0.313447	179.59	255.722	174.936	202.322	147.772	197.021	255.746	271.094	242.4	261.729
chrV:8272355-8274027:+	asp-5	F21F8.3	WBGene00000218	0.0409196	1.7484e-14	0.00631367	0.217204	0.761697	0.665093	0.671571	0.646294	-0.16805	-0.533574	0.347625	-0.110637	-0.0337088	-0.106399	-0.0783677	-0.105153	463.841	354.079	655.717	451.187	487.357	474.559	484.131	474.978	570.989	568.398
chrV:8267526-8268917:-	asp-6	F21F8.7	WBGene00000219	6.61789e-09	2.77612e-11	5.18681e-14	0.00119239	9.01655e-10	1	0.018724	0.537205	0.454519	-0.52079	0.86835	0.271752	0.469659	5.40477e-06	0.319277	-0.134532	742.321	368.768	929.475	609.723	717.421	499.892	628.012	454.097	557.599	587.529
chrII:8751933-8753886:+	atf-2	K08F8.2	WBGene00000220	0.0633807	0.0594867	0.454627	0.147603	0.229307	0.615937	0.000219567	0.689574	0.74238	0.76357	0.375868	0.600834	0.499785	0.353323	1.33564	0.286825	1.077	1.09102	1.11929	0.852062	0.762763	1.10798	3.00636	1.00679	0.769426	0.393258
chrX:14808777-14810780:-	atf-5	T04C10.4	WBGene00000221	0.151065	0.0682257	0.0636453	0.0472538	1.22504e-06	0.115582	0.0178801	0.819427	-0.214468	-0.265042	-0.267775	-0.276082	-0.581574	-0.260646	-0.327635	-0.0661875	49.8975	47.5433	42.1595	44.6672	36.6826	42.4088	40.4028	48.6946	56.959	63.3671
chrX:12480880-12484811:+	atf-6	F45E6.2	WBGene00000222	2.86034e-11	3.09527e-06	0.317699	0.567442	0.89754	0.975946	0.73244	0.896091	0.99911	0.74145	0.24646	0.130751	0.0351894	0.0213038	0.107124	-0.0626483	13.7424	11.2604	7.35228	6.7981	6.50737	6.20367	6.63289	5.8422	6.82573	7.20745
chrIII:4491596-4499012:-	atf-7	C07G2.2	WBGene00000223	0.595363	0.702487	0.229014	0.582309	0.874412	0.974539	0.783719	0.0459075	0.0724578	-0.0573162	-0.152706	-0.073067	-0.0248194	0.0118198	-0.0476235	0.239246	74.1103	66.7382	55.3668	62.4454	66.1439	62.161	59.6336	73.0412	68.8007	76.6863
chrIV:17269305-17272147:+	atgp-1	F26D10.9	WBGene00000224	0.55687	0.804538	0.0913147	0.342393	0.343424	0.860535	0.0783133	0.852455	0.10978	-0.055686	0.276677	-0.160533	-0.152202	-0.0662235	0.285716	0.0620799	20.284	17.7822	23.4756	15.5996	16.0686	18.3705	23.6302	20.1156	21.442	20.426
chrII:14640021-14644010:-	atgp-2	C38C6.2	WBGene00000225	0.000182139	0.0200775	0.0570183	0.114256	1.5152e-06	0.76689	0.000416008	0.0200466	0.311817	0.211051	0.267462	0.150915	-0.382604	-0.0861451	0.444181	-0.327035	314.46	288.988	298.677	262.389	184.557	232.027	338.827	195.366	275.23	275.135
chrV:9634837-9645478:-	atl-1	T06E4.3	WBGene00000226	0.585629	0.782424	0.586333	0.244267	0.707396	0.810384	0.139195	0.228266	0.0726862	-0.0431622	-0.0931897	0.132633	-0.0513431	0.068338	-0.201783	0.192161	45.0887	41.0627	35.148	43.9099	39.5037	39.4241	32.538	43.0524	41.8945	46.6578
chrI:183364-208467:+	atm-1	Y48G1BL.2	WBGene00000227	0.000329169	0.00177347	0.655848	0.00123536	7.35133e-05	1.1756e-05	0.00310496	0.000212692	0.416858	0.374092	0.0974782	0.379577	0.441486	0.618541	0.432314	0.528515	17.1425	16.3989	14.5794	15.5826	16.6799	21.1961	18.5498	19.8741	15.1521	13.8746
chrV:12478394-12484433:+	atn-1	W04D2.1	WBGene00000228	0.00253743	3.12033e-09	0.916564	0.000224136	0.00289063	0.0983322	0.00161428	0.381495	-0.30555	-0.557104	-0.0186505	-0.361951	-0.293021	-0.192343	-0.294137	-0.122325	91.0595	75.2012	106.186	81.8109	87.8485	93.9816	87.469	98.7196	120.006	123.074
chrIII:5228378-5230505:+	atp-2	C34E10.6	WBGene00000229	8.21871e-06	0.0257074	0.00184011	0.0717237	0.0446605	0.410148	0.0421162	0.819404	-0.308622	-0.17303	-0.286309	-0.142339	-0.150966	-0.118744	-0.19934	-0.0462995	1450.12	1572.97	1432.47	1522.49	1548.63	1611.65	1522.82	1695.87	1954.17	1960.57
chrI:5428546-5429911:-	atp-3	F27C1.7	WBGene00000230	0.0447109	0.140111	0.998696	1.27574e-08	1.412e-09	0.111109	0.0108246	0.251529	0.243232	0.193396	-0.000389895	0.592571	0.615554	0.250129	0.327405	0.195062	301.573	287.131	371.279	361.037	375.381	443.843	468.952	426.798	414.224	276.365
chrIII:10461292-10467953:+	atx-2	D2045.1	WBGene00000231	3.63796e-05	7.62926e-07	0.579584	3.31777e-07	3.29955e-28	0.00764666	0.00428735	5.14726e-06	0.487843	0.576022	0.135524	0.587043	1.16991	0.493282	0.491609	0.73422	26.4025	27.7483	22.1851	26.4564	41.028	28.7938	28.7738	34.3403	22.3922	20.2943
chrI:5967253-5973322:-	avr-14	B0207.12	WBGene00000232	0.805997	0.941668	0.494961	0.49496	0.887745	0.722685	0.608876	0.747054	0.108205	-0.0378607	0.274886	-0.253765	-0.0634411	-0.226161	-0.219833	-0.194792	2.45425	2.14434	3.63597	1.68947	2.03183	2.39071	2.39747	2.45238	3.23018	2.44175
chrV:13498772-13511705:-	avr-15	R11G10.1	WBGene00000233	0.999631	0.471724	0.407784	0.00852748	0.517662	0.243151	0.50827	0.97957	-0.000153517	-0.201301	0.204467	-0.559	-0.168798	-0.312158	-0.17189	0.0143311	7.48947	6.34838	9.1669	4.59693	6.30368	6.24822	6.92979	7.95566	8.78382	8.16101
chrIII:9467373-9467982:+	baf-1	B0464.7	WBGene00000235	0.626676	0.844375	0.873865	0.450571	0.0118723	0.97411	0.456338	0.921926	-0.0657583	0.0317392	0.0333282	0.0920574	-0.238009	-0.0132671	-0.115743	-0.0285283	168.608	178.3	152.673	176	142.804	147.727	137.308	146.08	166.271	192.395
chrI:6563641-6564454:-	bag-1	F57B10.11	WBGene00000236	0.497971	0.981829	0.0203313	0.319371	0.000970456	0.802591	0.816938	0.986847	-0.10031	-0.00478905	-0.307234	-0.134466	-0.350159	0.0732593	0.0483956	-0.0066834	87.0776	91.9328	62.9759	79.4335	69.7402	82.6107	81.1413	78.0258	87.4394	101.845
chrI:2949611-2957878:-	bam-2	Y71F9AR.1	WBGene00000237	3.51254e-06	0.353373	3.46382e-17	0.22763	0.00061932	0.197923	0.017329	0.0407239	0.697795	0.194512	1.12391	0.229977	0.51671	0.270027	0.387421	0.358902	8.13637	5.56788	13.1582	5.41058	6.81955	7.10808	7.73806	7.58127	6.51159	5.32806
chrX:7165960-7170582:-	bar-1	C54D1.6	WBGene00000238	0.78909	0.545213	0.06168	0.0536868	0.933739	0.915747	0.473204	0.0675908	-0.0794067	-0.164457	0.431976	-0.403646	0.0263561	0.0642356	0.203597	-0.461888	5.47381	5.07188	7.54675	4.01145	5.66022	5.71557	6.36053	3.82822	6.07681	6.32625
chrIII:5612232-5614637:+	bas-1	C05D2.4	WBGene00000239	8.64223e-07	0.00447796	0.00577894	2.88319e-06	0.00475362	0.0382642	0.127569	0.563738	-0.605898	-0.377559	-0.418992	-0.578564	-0.352602	-0.354257	-0.255222	0.14341	17.5416	20.4032	17.7691	16.7297	20.1189	18.6484	20.0147	26.6609	26.8248	29.4941
chrII:8762613-8766867:-	pah-1	K08F8.4	WBGene00000240	1.21478e-07	0.0001614	0.709104	2.34563e-05	7.62564e-06	0.492191	0.818999	0.894083	-0.514242	-0.385021	0.0852945	-0.419867	-0.427757	-0.170668	-0.0567755	0.046779	48.7086	52.6661	61.1158	48.664	49.5124	50.8248	55.186	59.4409	64.1113	76.3316
chrI:14371129-14376005:-	bbs-1	Y105E8A.5	WBGene00000241	NA	NA	0.775787	0.807688	0.597817	NA	0.456902	NA	0.160599	0.014712	0.159463	-0.118762	0.22881	0.074566	-0.331981	0.0585433	0.226635	0.153877	0.296232	0.0912895	0.245328	0.242837	0.0488765	0.237622	0.22803	0.162559
chrIV:7934085-7937734:+	bbs-2	F20D12.3	WBGene00000242	0.977041	0.598028	0.501025	0.874169	0.57812	0.869169	0.256999	NA	0.0181194	0.267907	0.339584	0.0900282	0.259122	0.156744	0.503443	0.0828422	0.209356	0.336865	0.322524	0.229419	0.316006	0.234447	0.422502	0.198293	0.179881	0.218666
chrV:6762459-6765055:-	bbs-8	T25F10.5	WBGene00000244	0.891664	0.8685	0.780466	0.997095	0.852273	0.877495	0.984081	0.980812	-0.0850427	-0.105179	0.174623	-0.00466554	-0.106376	-0.155091	0.0143466	0.0278662	0.669469	0.644958	0.810722	0.691429	0.625297	0.507673	0.655044	0.669009	0.716796	0.810267
chrX:6201873-6204711:-	bca-1	T13C5.5	WBGene00000245	1.78317e-05	0.100932	0.540418	0.000677021	0.0019732	0.56709	0.554793	0.885974	-0.581991	-0.261732	0.140855	-0.471548	-0.41544	-0.170139	-0.136326	-0.0565126	24.9929	31.1062	36.0939	25.3035	26.9584	28.7893	29.5069	31.285	36.36	41.409
chrIV:11086069-11092531:-	bcc-1	M7.3	WBGene00000246	0.153313	0.881767	0.926583	0.149218	0.280606	0.994725	0.18126	0.99225	-0.47145	-0.0746439	0.0535108	-0.469865	-0.351458	-0.00815479	0.456886	-0.00994317	1.77441	2.46135	2.42859	1.65395	1.8862	2.31418	3.40408	2.30487	2.59371	2.88866
chrIV:5661131-5664414:-	bec-1	T19E7.3	WBGene00000247	0.140735	0.0167541	0.278965	0.114925	2.15925e-05	0.507294	0.920771	0.904067	-0.195912	-0.295161	-0.211335	-0.204681	-0.459549	0.179019	0.0301984	0.046618	41.2285	37.9102	32.8858	38.2484	32.6802	43.6865	39.2178	39.6848	42.7965	51.6206
chrIII:3538280-3541615:-	ben-1	C54C6.2	WBGene00000248	0.920438	0.679558	0.433723	0.533582	0.83264	0.190091	0.868256	0.420638	-0.0215826	0.0788811	-0.125825	0.103759	0.041084	-0.213221	-0.0356668	-0.15076	47.9124	50.7467	54.5226	48.9993	47.9262	51.248	58.1489	53.5837	66.5258	52.9989
chrV:11644356-11645353:+	bir-1	T27F2.3	WBGene00000249	0.483676	0.677245	0.510589	0.866399	0.0711605	0.80769	0.553663	0.652474	-0.126081	0.0851176	-0.144625	-0.0367737	-0.255093	0.0918103	0.130731	-0.132689	39.3315	45.1796	31.0121	39.1135	34.2843	36.8798	37.8817	31.2883	38.4291	46.9027
chrV:13568822-13570015:+	bir-2	C50B8.2	WBGene00000250	0.67667	0.977725	0.0229888	0.701034	0.622423	0.00267447	3.48124e-09	0.880537	-0.0705598	0.00635608	-0.371843	-0.064756	-0.0763582	-0.48828	-0.851697	-0.0545361	44.5711	46.4718	32.8933	41.8067	42.444	30.235	23.2117	41.4008	48.0605	51.0502
chrII:10708901-10712066:+	bli-1	C09G5.6	WBGene00000251	0.2901	0.534131	5.69147e-14	0.683666	5.8311e-09	3.71701e-08	3.81614e-06	0.824144	0.424198	0.287319	2.12875	0.191985	1.67778	1.64734	1.40004	0.162708	0.78916	0.680597	4.96122	0.587606	2.2243	3.32884	2.69083	0.8665	0.801368	0.558739
chrII:5651392-5652408:-	bli-2	F59E12.12	WBGene00000252	0.711658	0.0484138	6.68032e-15	0.357289	1.25706e-06	5.83626e-07	5.6643e-05	0.800446	0.193268	0.761153	2.36907	0.401632	1.55151	1.63895	1.34178	0.194138	1.14777	2.11805	13.582	1.36319	4.22771	7.20756	5.48828	1.70953	1.45445	0.969475
chrI:146488-154850:-	bli-3	F56C11.1	WBGene00000253	0.874363	0.480043	0.213624	0.04943	0.611032	0.533295	0.460301	0.894083	-0.0343902	-0.125469	0.202644	-0.275264	-0.0871931	-0.149666	-0.135904	0.0439073	9.65237	8.92409	11.0603	7.60008	8.88804	8.59471	8.67318	9.8644	10.6628	10.7788
chrI:6342233-6356680:+	bli-4	K04F10.4	WBGene00000254	0.00449688	0.0190386	0.683905	0.225468	0.00719067	0.998549	0.147214	0.295041	0.254885	0.219651	0.0696635	0.126214	0.234905	-0.00134228	0.186551	0.16556	66.8118	64.3306	63.7424	56.9921	63.0157	60.6167	69.2443	68.211	67.6652	60.8335
chrIII:13427622-13429612:-	bli-5	F45G2.5	WBGene00000255	0.259431	0.992656	0.808607	0.161882	0.191864	0.966181	0.574331	NA	-0.495817	0.00643777	0.156061	-0.580741	-0.533065	0.0533127	-0.302168	-0.0862734	0.913924	1.93039	2.05129	0.716525	0.837671	1.79312	1.02797	1.46482	1.85463	2.10874
chrIV:6377083-6378184:+	bli-6	Y73B6BL.34	WBGene00000256	0.0754463	3.02876e-12	0.000291718	0.102527	1.53436e-13	0.428879	0.934445	0.0484005	-0.357181	-1.2366	1.25187	-0.329107	1.1338	0.446432	0.0566765	-0.794318	13.8796	6.98082	106.125	13.2667	39.531	49.4954	33.5836	13.4497	35.3524	19.6993
chrV:14453288-14456901:-	bmk-1	F23B12.8	WBGene00000257	0.353751	0.461579	0.00563762	0.513587	0.0055473	0.208615	0.190589	0.966304	-0.108625	0.0926318	-0.354529	0.0798128	-0.254615	0.212438	0.190299	-0.0151214	55.4551	63.0411	43.7026	59.1835	47.853	65.4566	64.4425	55.662	62.7649	65.213
chrII:6274234-6279661:+	bpl-1	F13H8.10	WBGene00000259	0.0204993	0.0203564	0.00802173	0.740674	0.0640848	0.518305	0.291289	0.914782	-0.289271	-0.294354	-0.407285	0.0570766	-0.226681	0.163191	-0.191884	0.0387863	11.8256	11.627	10.3395	14.1256	11.8256	15.6232	12.0838	14.2701	15.4821	15.8299
chrX:13598401-13599605:+	bra-1	F54B11.6	WBGene00000262	2.15833e-12	0.713526	0.409989	0.0078693	0.0153863	0.670231	0.867224	0.718515	1.39809	0.13012	-0.312641	0.607861	-0.563523	-0.24446	-0.0858851	-0.204384	24.0513	9.05424	5.8077	12.3838	5.08614	6.17954	7.02163	6.35545	8.41523	9.03166
chrIII:909979-910716:-	F23H11.5	F23H11.5	WBGene00000263	0.00503901	0.00113639	0.408269	4.63115e-05	0.0616998	0.834635	0.666739	0.57076	-0.228362	-0.261862	-0.116634	-0.314078	-0.155102	-0.0552942	-0.0690404	-0.10537	427.254	411.974	398.887	375.899	430.052	416.505	412.532	402.078	483.093	546.272
chrIII:3853087-3862940:-	brc-1	C36A4.8	WBGene00000264	0.642749	0.637554	0.0321789	0.286641	1.84021e-07	0.980129	0.0299339	0.645992	-0.0836889	-0.0885915	-0.344618	-0.162828	-0.607777	0.0136166	-0.348462	-0.126925	22.465	22.1081	18.8308	19.8291	14.7679	24.403	18.7862	22.0422	26.9533	25.9839
chrIII:6885148-6889469:-	brd-1	K04C2.4	WBGene00000265	0.258793	0.283364	0.354874	0.00872487	0.882188	0.187665	0.850203	0.660249	0.153862	0.151375	-0.173159	0.300767	-0.0266275	0.256182	0.048164	0.119225	26.3715	25.9825	19.5164	27.3325	22.1868	26.5903	22.9075	24.1011	24.6826	25.7481
chrIV:8987115-8990428:+	bre-1	C53B4.7	WBGene00000266	0.0766572	0.194548	0.00113402	0.0929965	0.35345	0.766852	0.0603891	0.713753	0.30773	0.245243	0.538152	-0.298752	0.17239	-0.112599	0.341485	-0.121254	16.695	15.752	20.5053	10.0041	14.4643	12.7673	17.7666	12.6866	15.45	14.5268
chrIII:13133822-13139513:-	bre-2	Y39E4B.9	WBGene00000267	0.941159	0.432963	0.139651	0.748907	0.727005	0.969524	0.879778	0.889	0.0376962	-0.308516	0.522616	0.136515	0.143009	-0.0406985	0.0858645	-0.105278	3.00504	2.18583	4.40643	3.06133	3.13584	2.70196	3.0225	2.55525	3.12347	3.16767
chrIII:9469842-9485367:-	bre-3	B0464.4	WBGene00000268	0.862516	0.636108	0.835104	0.0192731	0.852486	0.870545	0.890412	0.427311	-0.0350017	-0.0850245	-0.0515781	-0.296842	-0.0346128	-0.0603595	-0.0361569	0.17459	23.4309	22.3125	21.0422	18.1763	22.4091	20.882	21.2613	24.7356	24.3425	26.1628
chrI:1621353-1626607:-	bre-4	Y73E7A.7	WBGene00000269	0.0177288	0.310139	0.256528	0.126423	0.00350942	0.607305	0.497261	0.315602	0.415803	0.217561	0.272507	0.289987	0.472261	0.190079	-0.18465	0.284228	16.3888	13.988	16.0533	13.9642	16.3232	15.1417	11.4085	16.2115	14.6183	13.1506
chrIV:12049239-12051204:-	bre-5	T12G3.8	WBGene00000270	0.112374	0.742538	0.21085	0.703611	0.00403369	0.893059	0.15751	0.847928	-0.290521	-0.0835929	-0.30574	-0.0883761	-0.451857	0.0742945	-0.337494	-0.0886626	11.5212	13.2375	10.113	12.4746	9.79622	13.4791	9.88807	11.9262	14.2148	15.519
chrII:7305820-7308697:+	brf-1	F45E12.2	WBGene00000271	0.399251	0.681423	0.088874	0.301086	0.303291	0.308712	0.9973	0.999138	0.0997859	0.0579215	-0.241276	0.116166	-0.11145	0.188448	-0.000800444	-0.000944456	51.1623	49.0377	37.7251	48.3336	42.1673	51.256	44.7864	44.7819	49.9862	51.9509
chrI:5186946-5188619:+	bro-1	F56A3.5	WBGene00000272	NA	NA	0.19279	NA	NA	NA	NA	NA	0.24431	0.0497492	0.435156	-0.0976146	0.0993368	0	0.222005	0.116235	0.494208	0.194091	0.657799	0	0.251212	0	0.311746	0.16486	0	0.138619
chrIII:12020452-12025225:+	brp-1	Y79H2A.1	WBGene00000273	0.833096	0.554716	0.0782704	0.787531	0.000357412	0.202209	0.00171164	0.000139981	0.0374703	0.0917173	0.208298	0.0446464	0.370821	0.184784	0.333732	0.39727	82.0393	84.0736	115.094	77.081	99.3344	113.163	125.773	131.527	110.786	87.0194
chrII:13200093-13215640:+	btf-1	F15D4.1	WBGene00000274	0.000359927	0.000591061	0.323856	6.03575e-08	3.63004e-10	0.111558	0.367279	0.127844	0.412492	0.40335	-0.14903	0.594232	0.663595	0.239924	0.137641	0.225259	25.0324	24.5358	21.2729	26.5945	28.6158	28.0425	26.0858	27.7584	26.3787	20.3236
chrI:7251939-7255223:+	bub-1	R06C7.8	WBGene00000275	0.401675	0.139394	0.0214775	0.0726012	0.217904	0.93665	0.0415326	0.969538	-0.0860473	0.13835	-0.303124	0.156925	-0.111604	0.029998	-0.272423	0.0131994	100.245	115.773	83.2985	111.07	94.1786	105.61	85.1494	104.355	115.317	115.996
chrIII:6931946-6935807:+	byn-1	F57B9.5	WBGene00000276	0.556479	0.8319	0.748058	0.973967	0.0148207	0.881139	0.89532	0.747388	-0.0771109	-0.0340198	0.0559279	-0.00569996	-0.232341	0.0426142	-0.0262291	-0.0711007	71.926	73.193	71.6605	70.6741	61.6515	70.9982	67.6138	65.4976	76.82	82.738
chrX:12199587-12212981:-	cab-1	C23H4.1	WBGene00000277	0.468176	0.217343	0.120197	0.0248291	0.380031	0.494712	0.36977	0.707786	-0.118716	-0.186261	0.206049	-0.293852	-0.130939	0.135147	0.133956	0.0854473	44.586	41.9399	49.8799	36.8179	42.2524	47.419	47.3837	45.7743	48.0536	52.8641
chrIII:5083168-5085251:-	cah-1	F54D8.4	WBGene00000279	0.180419	0.000137592	0.207016	0.497126	0.887543	0.904493	0.00015847	0.734387	0.455484	1.07058	0.471567	0.260953	0.0665965	0.10672	1.14009	0.215344	3.80346	6.2356	3.88363	2.99945	2.61261	2.82272	6.80131	3.09748	2.83051	2.77885
chrII:7480708-7483064:-	cah-2	D1022.8	WBGene00000280	0.892289	0.958088	0.191368	0.609063	0.395388	0.980032	0.505632	0.805342	-0.0844077	0.0364652	0.588076	-0.25535	0.372924	0.035221	0.344329	0.206334	0.931192	1.06843	1.67772	0.685659	1.5045	0.796804	1.22992	1.01345	0.821942	1.12708
chrX:16487406-16489323:+	cah-3	K05G3.3	WBGene00000281	0.88049	0.0322771	0.125573	0.531127	0.0961863	0.633402	0.960559	0.300819	-0.0297732	-0.273455	0.260254	-0.0969641	-0.205224	-0.137291	0.0146526	-0.220625	48.648	40.3515	58.8062	43.3158	41.0615	44.0841	49.2496	41.5399	54.35	54.1212
chrX:13542504-13544531:+	cah-4	R01E6.3	WBGene00000282	4.22024e-10	0.0216003	0.911765	1.84629e-06	1.94378e-05	0.385196	0.243614	0.650438	-0.602216	-0.253975	-0.0249687	-0.470976	-0.413785	0.15944	0.165762	0.0991371	75.1376	94.8759	92.0723	77.0753	82.088	104.967	105.453	100.545	104.542	125.333
chrX:7019981-7023926:+	cah-5	R173.1	WBGene00000283	0.0113469	0.764659	0.767581	0.150594	0.805665	0.420916	0.880627	0.713822	-0.365363	-0.0662938	-0.0705431	-0.226815	-0.050177	-0.188223	-0.0401111	-0.105514	22.7237	27.8262	30.1411	23.4824	27.2659	27.6726	30.8201	29.4061	35.3805	32.2095
chrI:3629474-3630747:+	cah-6	T28F2.3	WBGene00000284	0.25497	0.846786	0.467978	0.769358	0.924945	0.867677	0.733789	0.855844	0.447331	0.108384	0.347875	-0.145236	-0.0507784	-0.155245	0.190398	-0.148456	3.43024	2.47712	3.20939	1.83272	2.06503	1.92801	2.75091	1.94413	2.53208	2.46284
chrV:12514857-12517186:-	cal-1	C13C12.1	WBGene00000285	0.349848	0.0530285	0.164236	0.00161016	0.0777229	0.189301	0.172538	0.703519	-0.2666	-0.492122	0.397757	-0.731446	-0.418087	-0.444034	-0.402716	-0.184769	10.5067	8.69425	15.206	6.80022	8.93014	7.83925	8.10976	9.66511	12.475	14.0615
chrII:8960650-8961508:+	cal-2	C18E9.1	WBGene00000286	0.483515	0.0429685	0.661805	0.186058	0.00318332	0.977177	0.963796	0.899262	-0.210609	-0.509592	0.180281	-0.34924	-0.654419	0.0280762	-0.0253234	0.0840343	12.2273	9.55884	12.8879	10.236	8.2816	11.3815	10.9084	11.9468	12.4294	15.6645
chrIV:3829541-3835159:-	cal-3	M02B7.6	WBGene00000287	0.510081	0.394516	0.602429	0.260269	0.970822	0.5013	0.604272	0.128315	-0.314244	-0.396207	-0.271141	-0.477393	-0.0234601	-0.412196	-0.267817	-0.680851	1.63222	1.46112	2.43287	1.25582	2.12889	2.10788	2.44453	1.55817	3.57354	2.50808
chrIV:10524748-10530572:+	cal-4	T07G12.1	WBGene00000288	0.460207	0.248798	0.418053	0.0203119	0.228955	0.808327	0.973197	0.757328	-0.265109	-0.391785	0.329162	-0.676116	-0.370039	-0.180764	0.0215815	-0.197828	3.11995	2.76945	3.70297	2.05489	2.73383	2.36808	2.84997	2.34947	3.11862	4.22678
chrII:9295877-9310242:-	cam-1	C01G6.8	WBGene00000289	0.258258	2.36629e-10	0.184611	0.00935345	0.0701761	0.466141	0.000728741	0.925734	0.13028	0.552768	-0.202507	0.252885	0.179456	0.155397	0.42953	0.0304453	31.8842	42.4088	25.7437	32.4689	31.5674	33.2265	40.4255	30.4036	33.1821	31.6854
chrIV:7228326-7230212:-	cap-1	D2024.6	WBGene00000292	0.19626	0.458719	0.166519	0.208392	0.0118342	0.989886	0.273215	0.88987	-0.156706	-0.103304	-0.195785	-0.1516	-0.258044	-0.00558684	-0.162661	-0.0404194	90.3078	92.568	75.7179	84.6543	80.392	86.6942	77.5498	84.5871	97.1124	109.91
chrII:10869136-10870928:+	cap-2	M106.5	WBGene00000293	0.212915	0.701049	0.492403	0.173013	0.865559	0.769044	0.836693	0.959574	0.136234	0.0543491	-0.0970722	0.144846	-0.0247397	0.0684034	-0.0365246	-0.0142535	88.0575	82.0439	75.7002	82.8091	75.185	85.0827	79.0095	80.2651	90.4304	87.1465
chrX:16807385-16813600:-	cas-1	F41G4.2	WBGene00000294	4.07437e-07	0.80957	0.0409963	0.276139	0.748558	0.984662	0.903859	0.896346	0.451427	0.0378953	0.225318	0.12506	0.0442282	-0.00713131	0.0231692	-0.0322093	37.4526	27.6108	31.8058	27.8166	26.8745	26.977	27.5771	26.5187	30.2566	29.6755
chrX:5705684-5710550:-	cat-1	W01C8.6	WBGene00000295	0.642749	0.893773	0.947586	0.709921	0.962502	0.963776	0.984011	0.815388	-0.23186	0.082809	-0.0499935	-0.188358	0.0292518	-0.0563262	0.0142123	-0.190298	0.792477	1.09765	0.986206	0.781201	1.00191	0.972351	1.05828	0.842941	1.16239	1.11116
chrII:257819-261063:+	cat-2	B0432.5	WBGene00000296	0.847287	0.727029	0.740179	0.152628	0.733556	0.703747	0.297989	0.750526	0.11331	-0.196047	0.196737	-0.588561	0.174837	-0.295028	-0.479571	-0.241519	0.98924	0.683493	1.49642	0.377211	0.999924	0.879533	0.695243	0.929194	1.3626	0.952489
chrV:10564855-10566441:+	cat-4	F32G8.6	WBGene00000298	5.00639e-09	6.79425e-15	0.361923	0.000308205	4.04514e-08	0.278519	0.163582	0.95853	-0.689263	-0.912277	0.24473	-0.443943	-0.625688	-0.328531	-0.341362	0.0298565	38.1681	32.0809	55.6207	42.5178	38.2038	36.0893	35.7208	47.3017	51.6118	68.0434
chrIV:9771134-9773454:+	cav-1	T13F2.8	WBGene00000301	1.50896e-08	1.06116e-31	0.677203	1.05897e-46	0.0802628	0.0496066	0.0412099	0.606043	0.93211	1.80077	-0.23904	2.17515	-0.33584	0.876294	0.827034	0.347325	37.0171	68.9518	9.04569	85.9136	13.8159	34.4644	32.7153	19.0462	13.8667	20.1818
chrV:13557148-13559910:+	cav-2	C56A3.7	WBGene00000302	0.713081	0.785681	1.823e-05	0.927944	0.0579585	0.727934	0.40311	0.848427	0.187359	-0.153648	1.41243	-0.0547576	0.674208	0.263929	0.38079	0.152694	1.81332	1.23924	4.62311	1.31516	2.74898	1.58828	1.79048	1.41758	1.32306	1.62214
chrIII:9766430-9774721:+	cbp-1	R10E11.1	WBGene00000366	0.000167454	1.65932e-10	0.64223	1.18452e-06	4.17063e-12	0.000271953	5.52742e-06	0.0506301	0.322139	0.517668	0.0810029	0.402449	0.545672	0.431505	0.502562	0.262105	60.815	68.8352	51.7665	60.1076	68.0596	66.3836	69.8308	58.8645	54.5049	52.8079
chrX:7847635-7861258:-	cca-1	C54D2.5	WBGene00000367	0.292907	0.72164	0.295347	0.00633391	0.746394	0.753784	0.362492	0.180649	-0.202064	-0.0864858	0.191756	-0.439664	-0.0723068	-0.104036	-0.174523	-0.260012	4.24482	4.55923	5.96902	3.34316	4.46087	4.82629	4.58213	4.30699	5.79661	5.35702
chrI:3641708-3647012:-	ccb-1	T28F2.5	WBGene00000368	6.41034e-37	1.05792e-14	3.31846e-12	5.62203e-49	2.86635e-16	0.0615224	0.286582	0.17685	1.52138	0.981938	1.1852	1.74428	0.999245	-0.443785	0.253716	-0.343513	24.4864	16.4417	20.217	26.8125	16.125	6.03076	10.1732	6.49373	9.37892	8.90023
chrIII:11918727-11920137:-	ccf-1	Y56A3A.20	WBGene00000369	0.000286294	0.000251117	0.989372	1.128e-08	1.97205e-18	0.191674	0.915281	0.00284407	0.568081	0.578832	0.00431553	0.845527	1.22776	0.254051	-0.0293107	0.443431	42.1831	41.9242	38.4277	48.195	65.0939	45.9351	37.4968	52.6687	42.7053	30.3143
chrIV:15270126-15275775:-	ccg-1	Y73F8A.6	WBGene00000370	0.354489	0.30175	0.933975	0.520133	0.833736	0.763748	0.063037	0.0832465	0.131836	-0.148977	-0.0222702	0.0962507	0.0367785	0.0910415	0.272735	0.275229	75.6461	61.1049	83.658	68.9628	67.6149	90.7099	103.327	103.525	94.8038	75.0228
chrI:9788740-9789956:+	cco-1	F26E4.9	WBGene00000371	0.0408431	0.285702	0.419153	0.165845	4.36084e-05	0.664086	0.851529	0.295158	-0.188239	-0.114108	-0.105345	-0.135958	-0.328586	-0.0853797	-0.032357	-0.146214	352.502	366.337	358.76	341.835	305.424	363.763	377.674	348.569	430.957	438.322
chrII:9803561-9805451:+	cyp-13A7	T10B9.10	WBGene00000372	NA	NA	NA	NA	NA	NA	NA	NA	-0.045427	-0.126488	0.0664498	-0.131799	-0.053374	-0.0308287	0.0381951	-0.0151996	0.0573425	0.0205216	0.0718779	0.017278	0.0507094	0.026861	0.0584862	0.0344164	0.0457014	0.0864397
chrV:5420996-5423289:-	cyp-14A5	F08F3.7	WBGene00000373	0.564979	0.986452	0.488576	0.510852	0.37389	0.234075	0.0162582	0.00289151	0.199431	-0.00841447	0.264182	0.21764	0.26488	0.459235	0.694816	0.845927	4.35773	3.64015	4.41176	4.13235	4.38409	5.17075	6.26354	7.06364	3.93363	4.04344
chrII:5503949-5506098:+	cyp-44A1	ZK177.5	WBGene00000375	0.597022	0.701888	0.194638	0.487431	0.00194894	0.737485	0.00750121	0.891097	-0.0803186	-0.063835	-0.220329	-0.0988563	-0.326169	-0.105184	-0.397572	-0.0474045	34.7113	34.6785	26.7099	31.996	27.8841	29.0053	23.5187	30.2648	34.9369	40.0294
chrIV:12361546-12371804:+	ccr-4	ZC518.3	WBGene00000376	0.1902	0.853097	0.136303	0.00580316	0.00191244	0.243376	0.665211	0.216267	0.122525	0.0254073	-0.273394	0.222594	0.239535	0.261648	0.103017	0.262783	81.2663	74.9497	61.4708	81.4225	84.3488	90.6754	80.8125	90.7475	83.6372	81.2381
chrII:8185391-8187551:+	cct-1	T05C12.7	WBGene00000377	0.198763	0.635071	0.057657	0.538808	0.00630334	0.927638	0.191715	0.800446	-0.125618	0.0583806	-0.208972	0.0674883	-0.224361	0.0267155	-0.154081	0.0553501	243.153	272.978	203.992	260.155	217.001	240.902	212.061	245.808	263.687	289.288
chrII:8927679-8929753:+	cct-2	T21B10.7	WBGene00000378	0.746365	0.0597893	0.858702	0.000811218	0.358122	0.292523	0.9313	0.0953357	0.0443383	0.189857	-0.0287749	0.299992	0.0996923	0.139134	0.0151949	0.18221	169.85	185.661	167.349	189.861	168.838	188.32	172.604	194.098	190.472	179.316
chrII:8283617-8285661:+	cct-4	K01C8.10	WBGene00000379	0.805154	0.0101366	0.721141	0.00100023	0.955031	0.593834	0.708394	0.615387	-0.0307402	0.211886	-0.0490003	0.256848	0.00771227	0.0854512	-0.0502721	0.078559	166.548	194.793	162.631	190.369	163.589	178.747	162.506	177.886	187.764	185.354
chrIII:4499160-4508082:-	cct-5	C07G2.3	WBGene00000380	0.278935	0.028193	0.0863285	0.538276	0.00094858	0.826516	0.00426818	0.475842	-0.0989128	-0.176824	-0.173915	0.0610545	-0.238992	-0.048981	-0.263544	0.103957	261.54	244.399	242.22	273.341	226.749	264.447	227.424	294.477	305.328	305.32
chrIII:5853488-5855643:-	cct-6	F01F1.8	WBGene00000381	0.258341	0.274816	0.235399	0.176936	0.182112	0.831381	0.912217	0.393966	-0.110021	0.109174	-0.150293	0.124977	-0.119156	0.0550983	-0.0218063	0.135783	185.64	213.575	161.815	204.447	176.395	187.103	177.209	198.07	200.719	218.45
chrI:4268070-4270288:-	cdc-6	C43E11.10	WBGene00000382	0.831708	0.512533	0.0407528	0.271913	0.186708	0.945491	0.0250007	0.998955	-0.0335088	0.0883279	-0.291182	0.127513	-0.141791	0.0286418	-0.313565	-0.00122204	52.2457	56.184	41.7475	54.6748	46.2888	52.4393	41.0723	51.3547	57.3367	58.2761
chrII:5587606-5593408:-	cdc-14	C17G10.4	WBGene00000383	0.735839	0.191978	0.0561178	0.191027	0.352608	0.38717	0.526558	0.622532	-0.0408899	0.126362	-0.243417	0.122585	-0.0894024	0.156182	0.100806	0.103687	53.5073	59.4252	41.6796	56.0481	49.4482	55.365	53.227	53.3357	55.2715	59.9795
chrI:6469387-6471953:-	cdc-25.1	K06A5.7	WBGene00000386	0.00603795	0.710336	3.19283e-06	0.720483	0.0305728	0.832387	0.521679	0.724928	-0.217429	0.0442103	-0.501453	0.0400764	-0.170727	0.0592036	-0.0995347	0.0790994	135.094	160.189	104.058	151.117	133.493	154.866	138.396	157.073	165.656	171.394
chrV:1577690-1585472:+	cdc-25.2	F16B4.8	WBGene00000387	1.2997e-05	1.39593e-09	0.186436	1.28806e-10	0.0228795	0.565733	0.040346	0.84491	0.683021	0.917175	-0.342175	0.961115	0.377008	0.2252	0.478728	-0.0963496	16.0401	18.7813	8.55049	18.3206	12.2728	13.1833	15.9888	10.3308	12.4011	10.5837
chrIII:8916339-8917851:-	cdc-25.3	ZK637.11	WBGene00000388	0.307177	2.1375e-05	0.00708862	0.140602	0.963889	0.691305	0.00104564	0.864712	0.168726	0.546027	-0.534568	0.223398	0.0108083	0.153507	0.611913	-0.0751089	36.6779	47.4442	21.1998	35.6611	31.3245	35.3855	49.6668	29.8744	35.2388	35.4027
chrII:10188251-10189346:-	cdc-25.4	R05H5.2	WBGene00000389	0.978084	0.478387	0.824154	0.594388	0.0404556	0.875837	0.308098	0.861263	-0.0182343	0.352746	0.144431	0.264667	0.773816	0.154835	0.476839	-0.152951	0.591269	1.05602	2.50992	0.879422	1.69225	2.55163	3.66636	1.72712	2.33521	0.663782
chrII:7616404-7617884:+	cdc-42	R07G3.1	WBGene00000390	0.979076	0.327594	0.429688	0.471657	0.685805	0.296634	0.94229	0.606626	0.00456198	0.120455	-0.122065	0.0900212	0.0544945	0.175982	0.0168375	0.106574	106.436	114.04	83.7833	105.633	105.411	103.492	92.5051	98.5842	101.968	115.548
chrX:8208700-8211098:-	cdd-1	C47D2.2	WBGene00000391	0.961362	0.243533	0.0529191	0.538047	0.811505	0.665444	0.719096	2.89248e-05	-0.0181778	-0.306979	0.477639	-0.173667	-0.0749268	-0.197607	-0.129611	-0.962978	11.549	9.13252	18.0089	9.57288	10.5735	10.731	11.3347	5.87152	13.9765	12.7512
chrIV:7547107-7547882:-	cdd-2	F49E8.4	WBGene00000392	0.437446	0.643376	0.593104	0.445493	0.414517	0.937074	0.153402	0.206726	0.146421	-0.102089	-0.147699	0.142718	0.143156	0.0457289	-0.318515	0.315315	48.1819	39.7192	33.0407	44.8527	45.9616	38.1006	29.0939	46.5576	41.1315	47.2109
chrX:6499872-6504576:-	cdf-1	C15B12.7	WBGene00000393	0.895063	0.0502515	0.544237	0.569902	0.553003	0.984111	0.239728	0.986948	0.0341051	-0.327822	0.138882	-0.115237	-0.115205	0.0119051	-0.233232	0.00876736	16.4689	12.514	15.7824	13.8304	14.1344	14.3753	12.0338	14.3615	15.9208	17.5053
chrIII:7741208-7754383:-	cdh-3	ZK112.7	WBGene00000395	5.82922e-08	1.06859e-16	0.831994	1.1539e-07	0.309053	0.960117	2.90149e-05	0.158646	0.797429	1.1674	-0.0654049	0.782549	0.18908	0.029433	0.700595	0.315062	3.32386	4.29281	2.07096	3.06652	2.04335	2.22424	3.63435	2.7401	2.42568	2.02192
chrIII:4520333-4536957:+	cdh-4	F25F2.2	WBGene00000396	0.0256718	6.40524e-10	0.000305833	2.68329e-17	7.9255e-17	0.523977	0.137464	0.22155	0.194514	0.471336	-0.494399	0.62365	0.605661	0.153455	0.235324	0.226175	17.8061	21.357	12.4388	22.4814	22.7287	19.8024	21.0029	20.8644	19.7877	16.9198
chrIV:8669129-8677961:+	cdh-5	F08B4.2	WBGene00000397	0.592996	8.48369e-05	0.340177	0.00117722	0.0914768	0.867777	0.0862426	0.999719	-0.135264	0.683542	0.392245	-0.598129	0.318611	-0.140958	0.617127	-0.000268401	3.6625	6.61503	10.536	2.42145	4.89711	6.48953	12.8748	7.38647	8.23781	4.40828
chrII:14843142-14850758:+	cdh-7	R05H10.6	WBGene00000399	0.751099	0.453811	0.0189853	0.94984	0.0117734	0.0401637	0.00467783	0.831819	-0.17391	0.365161	0.885614	0.0410658	0.904573	0.85528	1.02274	0.171743	0.177249	0.349468	0.853895	0.222251	0.583252	0.832158	0.975222	0.411181	0.372672	0.245754
chrX:16595163-16601969:+	cdh-9	F59C12.1	WBGene00000401	0.595923	0.853097	0.570179	0.905465	0.937582	0.998981	0.539406	0.880537	-0.270055	-0.116194	0.307877	-0.0733743	0.0479924	0.00203201	0.322749	-0.136403	0.385541	0.471902	0.785063	0.474486	0.560134	0.534066	0.801655	0.4416	0.593394	0.606704
chrIV:2436514-2463368:-	cdh-10	C45G7.5	WBGene00000402	0.000478788	4.38977e-06	2.77706e-07	0.807628	0.0132281	0.00497527	0.00105783	0.938239	1.13846	1.45151	1.57559	0.127347	0.821631	1.00151	1.08003	0.0671907	0.672043	0.873246	1.22292	0.231797	0.48005	0.747794	0.801247	0.303315	0.309499	0.231084
chrII:5945381-5956658:-	casy-1	B0034.3	WBGene00000403	0.791191	0.970482	0.484744	0.0081568	0.952732	0.971192	0.477437	0.77339	-0.0510696	-0.00892481	0.123681	-0.338298	-0.0126402	-0.0159477	0.123737	-0.07849	19.4094	19.7481	20.6832	14.7969	19.0775	18.7363	20.69	17.8987	21.1261	21.9293
chrIII:9747347-9748767:+	cdk-1	T05G5.3	WBGene00000405	0.281033	0.877591	0.000350538	0.539183	0.000239856	0.998507	0.00710463	0.295463	-0.109567	0.0226882	-0.430597	-0.0677905	-0.290564	-0.00151905	-0.336658	-0.179935	161.335	174.724	110.645	155.188	135.858	150.168	118.309	132.263	167.693	189.796
chrX:13515785-13518834:-	cdk-4	F18H3.5	WBGene00000406	0.552362	0.824708	0.17939	0.68818	0.303355	0.92828	0.00590116	0.744357	0.165048	-0.0757168	-0.37202	0.11653	-0.243705	0.0615583	-0.676187	-0.155022	10.3644	8.52978	5.55554	9.3253	7.27937	7.74963	4.36429	6.58443	8.27589	9.97413
chrIII:13464583-13466289:-	cdk-5	T27E9.3	WBGene00000407	0.865289	0.980378	0.0713813	0.331088	0.297556	0.684154	0.936845	0.99249	-0.0348148	-0.00587085	-0.302175	0.144743	-0.147543	0.123178	-0.0236677	-0.0049163	42.6892	42.9969	32.3671	45.3069	37.6726	43.9948	39.595	40.108	44.9099	47.6689
chrI:2281116-2291185:-	cdk-7	Y39G10AL.3	WBGene00000408	0.37604	0.0276204	0.016273	0.106266	0.00156441	0.331986	8.34986e-08	0.793651	-0.12113	-0.257877	-0.325431	-0.19513	-0.330694	-0.18557	-0.648154	-0.0718207	57.4744	51.51	43.4013	50.9129	47.3707	47.9892	34.4627	52.0428	61.101	68.2237
chrI:8702472-8705790:+	cdk-8	F39H11.3	WBGene00000409	0.460788	0.832605	0.196016	0.380015	0.22771	0.126046	0.714436	0.874648	0.103705	0.0382743	-0.224014	0.11758	-0.146144	0.283595	0.0829706	0.0537635	36.1974	34.128	25.3277	34.1479	29	36.4913	31.6056	30.9558	33.214	36.64
chrI:11323519-11333144:+	cdk-9	H25P06.2	WBGene00000410	0.49627	0.0739734	0.560707	0.000529827	0.0016281	0.6653	0.0124091	0.969538	0.1085	0.238572	-0.105009	0.401895	0.357316	-0.109051	-0.334166	0.0135794	28.9228	31.3166	31.5462	33.2795	33.0149	31.4445	26.7636	34.3097	37.9	29.1558
chrII:10785393-10787206:+	cdl-1	R06F6.1	WBGene00000411	0.122002	4.31828e-05	0.0565614	1.03686e-06	0.336842	0.098427	0.0495024	0.265872	0.154733	0.350105	-0.312668	0.404535	0.099883	0.307433	0.3172	0.22942	126.731	143.551	79.4723	141.084	116.6	124.353	125.249	117.547	111.122	123.824
chrV:15921342-15922801:+	cdr-1	F35E8.11	WBGene00000412	0.329467	0.52539	0.313695	0.909992	0.118854	0.934491	0.615109	NA	0.438449	-0.316951	0.461021	-0.0691387	0.612383	-0.0907036	-0.262011	0.312458	1.27726	0.295438	1.0566	0.521937	1.49355	0.357687	0.172867	0.834265	0.484765	0.701386
chrI:3223164-3228024:-	cdt-1	Y54E10A.15	WBGene00000413	0.608921	0.0226669	0.0127074	5.8883e-05	0.0902421	0.434156	0.452439	0.728318	0.0772741	0.259539	-0.43317	0.410804	0.19004	0.206447	0.163639	0.113593	23.7524	26.6749	15.3391	28.1039	24.6019	24.4523	23.7127	22.8575	23.4766	24.4943
chrIII:8426266-8428508:+	cec-1	ZK1236.2	WBGene00000414	0.367258	0.992575	0.984185	0.126486	0.820942	0.591668	0.432875	0.293	0.170802	0.00272371	-0.00720407	0.257665	0.0513598	-0.165064	-0.173671	-0.249547	20.4893	17.8992	20.3401	20.3929	17.9704	18.1157	18.014	17.0461	22.8213	19.7158
chrI:11851334-11868096:-	ced-1	Y47H9C.4	WBGene00000415	0.00653786	0.00350423	0.953464	0.961217	0.0112511	0.189471	0.186374	0.00437144	0.267212	-0.29069	-0.0169441	-0.00830571	0.242108	0.248143	0.218057	0.417348	35.98	23.9378	30.0526	27.6754	33.8018	36.3479	35.5838	41.0485	33.9288	32.4602
chrIV:1597315-1601620:+	ced-2	Y41D4B.13	WBGene00000416	0.980743	0.226014	0.00127086	0.496985	0.0550208	0.898973	0.0309831	0.835325	-0.00452493	-0.160178	-0.499375	0.0958224	-0.214424	-0.0535851	-0.355312	-0.072161	68.9272	60.8914	46.1719	69.1411	56.8081	63.7432	51.2493	62.9154	73.9355	75.3318
chrIV:13198314-13204105:-	ced-3	C48D1.2	WBGene00000417	3.24755e-05	0.000421732	0.095084	3.48097e-17	4.79834e-16	0.000706406	0.00611966	0.0369314	0.436563	0.383335	-0.222238	0.820293	0.777668	0.407611	0.328955	0.276571	38.8228	36.9057	32.0463	47.5555	47.2621	50.1012	47.3919	45.6542	41.8428	31.0159
chrIII:4852289-4855144:+	ced-4	C35D10.9	WBGene00000418	0.938835	0.778406	0.0307996	0.995664	0.0238557	0.988973	0.458476	0.818851	-0.017104	0.0563115	-0.370832	0.00208796	-0.283147	-0.00798188	-0.157226	-0.0812948	34.4721	35.8929	22.6404	32.5989	27.2596	29.5199	26.4657	27.9647	33.1002	38.0108
chrIV:10484090-10492932:+	ced-5	C02F4.1	WBGene00000419	0.214704	0.310683	0.0862202	0.0578155	0.131289	0.0586986	0.126557	0.305638	0.142552	0.124156	-0.204257	0.198394	0.158637	0.240301	0.184634	0.154859	43.3455	42.2681	35.1856	42.0914	41.9312	48.1751	46.3269	45.359	45.3491	42.6948
chrIII:5595730-5598393:+	ced-6	F56D2.7	WBGene00000420	0.00776329	0.067919	0.787912	0.00639716	0.000622381	0.15405	0.0179503	0.0640962	0.348158	0.261006	-0.0621146	0.353624	0.415489	0.257526	0.343189	0.297646	32.6915	30.3108	25.6854	30.6301	32.7969	32.2901	34.3471	33.2417	29.9494	27.7535
chrIII:9570131-9579788:-	ced-7	C48B4.4	WBGene00000421	0.0431663	0.845018	0.775787	0.000281646	0.00192151	0.00124553	0.0687229	0.135268	0.184798	0.0282752	-0.0459489	0.299952	0.255134	0.329923	0.196827	0.18301	56.0552	49.5887	49.097	56.7531	56.32	63.9879	58.2662	57.7012	56.5725	53.6258
chrX:8413962-8416866:-	ced-8	F08F1.5	WBGene00000422	0.61773	0.172296	0.212964	0.384116	0.0384838	0.822598	0.699613	0.998964	-0.180342	0.406227	-0.473732	0.273581	-0.543772	0.171767	-0.187899	-0.00277109	3.16806	4.99988	1.72143	4.25609	2.25806	3.05144	2.23724	2.63242	2.94933	3.99343
chrIII:10335078-10337435:+	ced-9	T07C4.8	WBGene00000423	0.645783	0.937231	0.0145731	0.998865	0.476182	0.868355	0.0148898	0.701349	-0.0708657	0.0158436	-0.379855	-0.000481047	-0.0958368	0.0634701	-0.37648	0.109215	60.506	63.4722	44.0697	59.458	56.8486	60.6678	44.1901	62.7092	64.6657	69.3134
chrIV:3506401-3509526:-	ced-10	C09G12.8	WBGene00000424	0.6407	0.46629	0.345658	0.234015	0.436849	0.407505	0.697033	0.564528	0.0873819	0.129508	-0.156648	0.183634	0.124784	0.168841	0.0774266	0.128208	40.6986	41.4755	30.7428	40.7228	39.9616	38.7704	36.3456	37.6899	38.3677	41.6358
chrIII:9119482-9125073:+	ced-11	ZK512.3	WBGene00000425	0.365422	0.0620261	0.549406	0.000603362	0.306102	0.949916	0.149401	0.879029	0.249575	0.452169	0.218313	0.72529	0.257989	0.0537092	0.427932	0.0936487	2.05291	2.36642	2.13555	2.75348	1.97758	1.88038	2.52463	1.93597	2.00586	1.84329
chrI:10222870-10227476:-	ced-12	Y106G6E.5	WBGene00000426	7.2207e-05	0.000857966	0.957851	2.98422e-08	1.63757e-07	0.031201	0.0584733	0.0510548	0.475662	0.413854	-0.012965	0.637324	0.591102	0.291513	0.243572	0.263151	30.2958	28.625	27.4521	31.741	31.4444	34.0701	32.9366	33.4051	30.9052	23.4897
chrX:8299067-8299602:-	ced-13	R09F10.9	WBGene00000427	NA	NA	0.971811	NA	0.962502	NA	NA	NA	0.444477	0.507579	-0.0196981	-0.105022	-0.0232476	0.0155053	0.959825	-0.0651788	0.97587	1.11454	0.0634591	0	0.147946	0.126214	2.43938	0	0.0898499	0.168564
chrX:4653407-4654130:-	ceh-1	F16H11.4	WBGene00000428	NA	NA	0.7841	NA	0.936612	NA	NA	NA	-0.00781345	-0.0291775	0.131467	-0.0393703	-0.0384688	0.287824	0.231808	0.166763	0.376205	0.341969	0.345194	0.314494	0.322039	0.564712	0.488978	0.394387	0.187092	0.42298
chrI:6046834-6050464:-	ceh-2	C27A12.5	WBGene00000429	0.952162	0.974101	0.895201	0.594716	0.866291	0.890336	0.984081	NA	0.0372382	0.0234002	0.0880676	-0.260871	0.0974978	-0.133347	-0.0134947	0.28345	0.864404	0.834647	0.837441	0.470213	0.896752	0.517102	0.6876	1.17673	0.787648	0.888104
chrI:9727195-9728012:+	ceh-5	C16C2.1	WBGene00000430	0.927972	0.97035	0.623779	0.750153	0.603094	0.632008	0.318973	0.653569	0.0580511	-0.0264335	-0.274909	0.171946	0.254514	-0.350747	-0.472833	-0.317648	1.56904	1.36486	1.91445	1.71235	1.92991	1.73508	1.43115	1.80305	3.07146	1.56956
chrI:8498108-8502406:-	ceh-6	K02B12.1	WBGene00000431	0.992144	0.138342	0.234459	0.961611	0.393108	0.911379	0.0896184	0.477839	0.00610455	0.628654	0.543957	-0.0307044	0.376934	0.120845	0.717928	-0.435557	0.521752	1.10183	1.20583	0.461823	0.794502	0.720537	1.46899	0.297955	0.679274	0.561786
chrII:8703318-8703779:-	ceh-7	C34C6.8	WBGene00000432	NA	NA	NA	NA	NA	NA	NA	NA	0.125948	-0.0435929	-0.0080737	-0.0960259	-0.0679205	-0.0478591	0.155933	-0.0464705	0.606917	0.130373	0.10253	0	0.08312	0	0.61249	0	0.138719	0.272346
chrI:8245716-8250890:-	ceh-8	ZK265.4	WBGene00000433	NA	NA	0.955219	NA	NA	NA	NA	NA	-0.0864732	-0.033771	-0.031763	-0.0791636	-0.0706195	-0.00851427	0.305632	-0.11702	0.0962379	0.135357	0.112588	0.0973813	0.104473	0.130454	0.389111	0.0578367	0.15019	0.178337
chrI:565439-566394:-	ceh-9	Y65B4BR.9	WBGene00000434	NA	NA	0.225165	0.215112	0.296994	NA	0.847166	NA	0.0532363	-0.300363	0.492152	-0.447808	-0.384903	0.107388	0.111849	0.172341	1.10494	0.434104	1.36334	0.202174	0.322365	0.56142	0.560118	0.672912	0.402135	1.08513
chrIII:5799028-5801064:+	ceh-10	W03A3.1	WBGene00000435	0.593806	0.242657	0.472298	0.660439	0.865146	0.981396	0.510316	0.782763	0.267888	0.515335	0.369355	0.223978	0.0976585	0.0335676	0.339218	0.222188	1.21481	1.58063	1.36297	1.07675	0.954729	0.90666	1.31768	1.14469	0.956356	0.950308
chrI:5840292-5841891:+	ceh-12	F33D11.4	WBGene00000436	NA	NA	NA	NA	NA	NA	NA	NA	-0.0901131	-0.0882876	0.0877995	-0.135867	-0.107507	0.0189503	-0.00527639	-0.050564	0.0568164	0.0587104	0.247119	0	0.0364753	0.150905	0.112729	0.053054	0.135847	0.192184
chrIII:7555594-7558142:+	ceh-13	R13A5.5	WBGene00000437	0.461957	0.759197	0.25814	0.491971	0.696351	0.41613	0.425714	0.513869	0.271929	0.139162	0.435655	0.253797	0.15429	0.408842	0.331685	0.341692	5.06115	4.4756	4.29068	4.66626	4.38533	4.18451	3.91249	3.94194	3.23533	4.38026
chrX:7528570-7532686:-	ceh-14	F46C8.5	WBGene00000438	0.791168	0.786801	0.631846	0.360751	0.794077	0.952633	0.860868	0.708037	-0.149784	-0.159644	0.269226	-0.410039	0.143402	0.0746422	0.117712	0.278178	0.673793	0.652851	1.4133	0.39297	0.966177	1.10044	1.16517	1.42751	1.10463	0.920715
chrIII:8622578-8625920:+	ceh-16	C13G5.1	WBGene00000439	NA	NA	0.577257	NA	0.643185	NA	NA	NA	0.0826677	0.46836	-0.24243	0.205466	0.17842	0.056278	0.0824377	-0.174204	0.19735	0.730372	0.185713	0.323024	0.302143	0.607613	0.647244	0.270077	0.574661	0.110763
chrI:4568963-4570028:-	ceh-17	D1007.1	WBGene00000440	NA	NA	NA	NA	0.318566	NA	NA	NA	-0.31254	-0.425013	0.221299	-0.276691	-0.322419	0.108178	0.153222	-0.0176271	0.215849	0.0909933	0.333696	0.23423	0.201422	0.20574	0.258867	0.0777609	0.100964	0.681184
chrX:3843360-3857778:-	ceh-18	ZC64.3	WBGene00000441	0.341818	0.285702	0.0374084	0.0237106	0.565576	0.999333	0.906356	0.458061	-0.215364	-0.242645	0.392793	-0.434126	0.133019	-0.000736269	0.0393121	-0.211069	6.23267	6.03313	9.49364	4.95731	7.70653	7.11496	7.32865	6.0965	7.94071	7.96554
chrIV:7953497-7955886:-	ceh-19	F20D12.6	WBGene00000442	0.98967	0.672117	0.614714	0.951292	0.877396	NA	0.299837	NA	0.00822899	0.228889	0.262464	-0.0390797	0.0897551	0.131442	0.456718	0.540197	0.721998	1.02701	0.546314	0.614863	0.793123	0.404937	0.799161	0.918071	0.294688	0.777136
chrIII:6979829-6981733:+	ceh-20	F31E3.1	WBGene00000443	0.000960285	2.82137e-08	0.000326521	0.000440125	6.30762e-05	5.48177e-13	3.62609e-34	0.000607565	0.661247	1.0402	0.659705	0.694897	0.750122	1.18824	1.89205	0.639809	11.6077	15.2199	13.3656	11.1315	11.8607	19.6695	32.7972	13.1565	9.09001	7.64619
chrX:1848789-1852730:-	ceh-21	T26C11.6	WBGene00000444	1.69747e-07	0.000207012	0.299951	0.0136993	0.870994	0.36653	0.146809	0.455303	0.792941	0.597491	-0.244273	0.417747	-0.0428237	-0.262075	-0.319476	-0.224447	12.6375	10.8147	5.65121	8.99279	6.5713	5.57368	5.34261	5.73584	7.55658	7.71594
chrV:10672438-10675623:+	ceh-22	F29F11.5	WBGene00000445	0.981397	0.703592	0.505986	0.958742	0.842884	0.955505	0.826824	NA	-0.0139347	0.201555	0.342461	-0.0321323	0.108431	-0.0667446	0.138236	-0.331156	0.290343	0.437573	0.728958	0.261762	0.353714	0.386848	0.546969	0.221582	0.48773	0.325286
chrIII:7839528-7841425:+	ceh-23	ZK652.5	WBGene00000446	0.902506	0.373569	0.690204	0.825228	0.885805	0.993469	0.985022	NA	-0.0765794	0.420654	0.215682	-0.124808	0.0850157	-0.0112952	-0.0125267	-0.0663108	0.564154	1.16252	0.769388	0.482005	0.701962	0.482757	0.480393	0.420095	0.551053	0.700359
chrV:13813295-13815258:+	ceh-24	F55B12.1	WBGene00000447	NA	NA	0.939667	0.998081	0.877821	NA	0.876828	NA	-0.0156059	-0.195649	-0.0558884	-0.00364802	-0.0867204	-0.188437	-0.1015	-0.13151	0.550015	0.363843	0.645199	0.526954	0.457848	0.505257	0.59464	0.55985	0.80435	0.618579
chrIII:8067224-8071356:+	pros-1	K12H4.1	WBGene00000448	0.394996	0.817065	0.490493	0.343985	0.672435	0.950036	0.621906	0.797789	-0.349493	-0.122729	0.314916	-0.375976	-0.187326	-0.0695478	0.239104	-0.187464	1.03989	1.27293	1.83326	0.951447	1.16047	1.28838	1.71351	1.14865	1.5339	1.57378
chrV:11661535-11664679:-	ceh-27	F46F3.1	WBGene00000449	0.87159	0.900639	0.430824	0.123321	0.585992	0.886487	0.693516	NA	0.0996146	-0.0805002	0.391876	0.632083	-0.264727	0.142809	-0.223286	-0.284514	0.974978	0.736124	1.2128	1.76194	0.545665	0.849506	0.432643	0.380427	0.748067	0.91754
chrX:13074613-13076023:+	ceh-28	K03A11.3	WBGene00000450	NA	NA	NA	NA	NA	NA	NA	NA	-0.0659234	-0.0650557	-0.00553385	-0.0656111	-0.0684883	-0.0379892	-0.037148	-0.0376704	0	0	0.0367724	0	0	0	0	0	0.0497515	0.0480395
chrX:3063575-3065541:+	ceh-30	C33D12.7	WBGene00000451	0.721324	0.7481	0.916277	0.510769	0.914208	NA	0.867262	NA	-0.187684	-0.180959	0.0727239	-0.306059	0.0641671	0.00589584	-0.10687	-0.22025	0.51315	0.511642	0.609816	0.371105	0.747127	0.541495	0.428422	0.328392	0.599518	0.783054
chrX:3068638-3070386:-	ceh-31	C33D12.1	WBGene00000452	NA	NA	0.79398	0.796575	0.570828	NA	0.893974	NA	-0.155022	0.0138389	0.14642	0.12625	-0.241758	-0.337852	-0.081509	-0.346068	0.225278	0.357651	0.512242	0.437943	0.16654	0.134349	0.313647	0.12789	0.4263	0.382602
chrV:11701743-11705382:-	ceh-32	W05E10.3	WBGene00000453	0.300835	0.699761	0.916277	0.171133	0.915607	0.942012	0.865736	0.994482	0.317578	0.148299	0.0611365	0.392164	0.0434795	0.0691631	-0.092144	-0.00825213	4.46186	3.8474	3.15548	4.43252	3.43214	3.16469	2.75685	2.9606	3.33022	3.77136
chrV:5323188-5324600:-	ceh-33	C10G8.7	WBGene00000454	NA	NA	0.759222	0.0759151	0.509739	0.496541	0.697382	NA	-0.548326	-0.368793	0.186284	-0.662726	-0.295248	-0.431093	-0.221258	-0.480265	0.339637	0.519446	1.23463	0.216886	0.578455	0.423209	0.649493	0.372699	1.05738	1.10239
chrV:5315497-5319561:-	ceh-34	C10G8.6	WBGene00000455	0.55492	0.893581	0.936376	0.761746	0.728088	0.988482	0.576752	0.92351	0.289849	-0.0854128	0.0589062	0.161288	0.178114	0.0196342	-0.292324	-0.088647	1.78297	1.13984	1.83944	1.45694	1.50439	1.76468	1.23104	1.56626	1.92223	1.40098
chrX:14183380-14185528:-	ceh-36	C37E2.4	WBGene00000457	NA	NA	NA	0.0437697	0.916075	NA	NA	NA	0.250474	0.558313	0.109114	0.691259	-0.0556448	0.298907	0.0868295	0.220539	0.333064	0.662601	0.0938224	0.791877	0.0998395	0.274831	0.0750397	0.197595	0	0.125287
chrX:14197293-14209084:-	ceh-37	C37E2.5	WBGene00000458	0.182426	0.794483	0.00144489	0.693133	0.391284	0.983997	0.577748	0.651072	0.409031	0.112845	0.959965	0.150308	0.269806	-0.0229453	0.240225	-0.258218	5.39053	4.18726	7.74942	4.08698	4.60418	3.36091	4.23968	2.7224	3.83154	4.20724
chrII:6951598-6955366:+	ceh-38	F22D3.1	WBGene00000459	0.00691876	0.00094624	0.370736	0.0235811	0.0604729	0.507294	0.612858	0.563309	0.273901	0.328023	-0.132	0.235367	0.193398	0.129402	0.083525	0.113121	48.2123	49.4482	35.7426	43.8173	43.5502	42.9994	41.6384	42.5166	43.7726	43.2828
chrX:1854142-1856166:-	ceh-39	T26C11.7	WBGene00000460	7.16996e-21	2.69081e-13	0.976232	1.5315e-09	0.446223	0.749424	0.591101	0.284502	1.19591	0.964468	0.0128562	0.812284	0.138427	-0.144635	-0.157543	-0.309838	29.032	24.2671	12.3686	20.5998	12.973	10.9846	10.879	9.68525	13.6567	13.3343
chrX:12318091-12320632:-	ceh-40	F17A2.5	WBGene00000461	0.30564	0.00118565	0.191324	0.0191119	0.911833	0.882082	0.125967	0.787598	0.320399	0.814062	-0.524598	0.61355	0.0460753	-0.132274	-0.594	-0.19418	5.83516	8.50551	2.69901	6.88982	4.48715	3.91207	2.50781	3.70184	4.95346	4.89627
chrX:1846671-1848669:-	ceh-41	T26C11.5	WBGene00000462	0.0146184	0.204974	0.804115	0.0160421	0.312276	0.912741	0.807445	0.915972	0.529722	0.321973	-0.104343	0.521794	0.246295	-0.077887	-0.102789	-0.0650903	10.1224	8.53734	6.09867	9.3939	7.8111	6.22326	6.10761	6.29524	7.39493	7.36346
chrIII:4446606-4449912:-	ceh-43	C28A5.4	WBGene00000463	0.108285	4.26076e-05	0.824935	2.25498e-05	0.718371	0.984111	0.750581	0.860013	0.585024	1.27138	-0.142327	1.29379	-0.167765	0.026924	0.1891	-0.151779	3.54414	6.45482	1.67359	6.20305	1.6414	2.02619	2.44756	1.65187	2.20513	2.17416
chrIII:2530605-2546408:+	ceh-44	Y54F10AM.4	WBGene00000464	0.856274	0.460688	0.0159374	0.000901975	0.112776	0.53708	0.689522	0.912899	0.0263866	0.0870462	-0.315023	0.284131	0.14694	0.133176	0.074967	-0.0332593	26.7301	27.5333	21.5629	29.924	27.8206	29.6694	28.4718	26.3576	30.1056	28.5788
chrIII:4489328-4491365:+	cpg-1	C07G2.1	WBGene00000465	0.0106016	0.000530836	0.000164485	1.62109e-08	0.00298419	0.0107176	0.1774	0.954465	0.21485	0.280648	-0.483515	0.427608	0.23722	0.369035	0.206478	-0.0198554	944.671	975.51	627.468	1024.62	917.518	1154.26	1027.67	874.137	988.956	885.019
chrI:9665246-9668655:+	cel-1	C03D6.3	WBGene00000466	0.941159	0.935291	0.294356	0.893479	0.297398	0.814957	0.0667704	0.972202	0.0129697	-0.0155197	-0.153897	0.0222378	-0.121481	-0.0669177	-0.239645	0.0114034	41.2325	39.8965	34.8819	38.7449	35.8591	37.1266	32.8187	39.2268	43.4041	44.5083
chrI:8324113-8328851:+	cep-1	F52B5.5	WBGene00000467	0.768764	0.2241	0.0647594	0.79156	0.0116251	0.5461	0.538052	0.9755	0.0459944	0.151601	-0.251098	0.0412844	-0.258798	0.130344	0.104496	-0.0109995	48.5323	51.6639	35.3402	45.1751	37.4107	46.3692	45.529	41.93	47.152	51.178
chrI:8633919-8636038:+	ces-1	F43G9.11	WBGene00000468	NA	NA	NA	NA	0.421217	NA	NA	NA	-0.261723	0.150988	-0.0624086	0.0738464	-0.282211	-0.177283	-0.11942	0.00609669	0.0738452	0.463213	0.129671	0.35808	0.072824	0.0259945	0.07495	0.199837	0.219171	0.333248
chrI:14961490-14965344:+	ces-2	ZK909.4	WBGene00000469	0.470971	0.861232	0.862458	0.223914	0.979154	0.45647	0.283149	NA	0.343844	-0.109461	0.114352	0.517176	-0.0171196	-0.450284	-0.480818	-0.44085	1.64578	0.92207	1.04668	1.85335	1.02835	0.344711	0.314926	0.358654	0.982036	1.18308
chrII:11039391-11041148:-	cey-1	F33A8.3	WBGene00000472	8.62303e-05	2.206e-05	0.0549291	1.14628e-08	7.93067e-22	1.43882e-07	1.54847e-09	3.9714e-19	0.527362	0.569192	0.29978	0.734169	1.17037	0.707342	0.785125	1.11849	132.427	134.667	119.01	143.518	201.013	159.369	168.632	214.224	106.908	98.6618
chrI:5619572-5620671:+	cey-2	F46F11.2	WBGene00000473	0.0333376	1.80619e-05	0.000228421	1.99991e-08	0.0122687	0.000192255	0.276965	0.399602	0.193613	0.353503	-0.300153	0.444943	0.214063	0.310846	0.110042	-0.106361	800.014	882.473	639.463	891.846	775.965	981.658	852.716	732.619	880.437	760.579
chrI:5571787-5572976:-	cey-3	M01E11.5	WBGene00000474	0.0103071	0.194734	0.000128817	0.514839	0.00962546	0.173679	0.0981196	0.895124	-0.207483	0.121371	-0.378249	0.0669715	-0.202083	0.182634	-0.187113	-0.0320063	513.092	637.447	398.034	581.103	492.55	591.266	455.542	508.228	579.844	646.416
chrIII:10866847-10868628:-	cey-4	Y39A1C.3	WBGene00000475	0.0707569	0.145252	0.957588	9.37841e-05	0.065328	0.536191	0.0655612	0.00587338	0.177576	0.152169	-0.0103798	0.336419	0.172398	0.102001	0.190169	0.272669	383.393	371.32	315.385	400.536	365.207	341.311	363.217	384.926	354.332	368.575
chrI:9994721-9999918:-	cfi-1	T23D8.8	WBGene00000476	0.90868	0.714714	0.649705	0.141534	0.774206	0.838094	0.88863	0.71962	0.0626424	-0.180468	0.224024	-0.536796	-0.133704	0.165003	0.0850725	-0.235493	2.90821	2.29621	2.86179	1.55298	2.32159	2.71736	2.52775	1.86634	2.60558	2.99382
chrV:5538784-5545750:+	cft-1	C18C4.2	WBGene00000477	0.839846	0.513631	0.568064	0.719995	0.944055	0.93551	0.68583	0.966304	-0.0970448	-0.269517	0.239578	-0.153679	0.0344705	0.0725434	-0.183389	-0.0360795	1.1304	0.959069	1.59237	1.00519	1.20825	1.39393	1.11368	1.26479	1.45442	1.33828
chrV:3441498-3444874:-	cfz-2	F27E11.3	WBGene00000478	0.0214106	0.00981035	0.463956	2.15806e-05	0.0307534	0.839453	0.803723	0.986802	0.6785	0.756102	0.350855	1.12777	0.614597	0.177482	0.148159	-0.0198535	2.70941	2.85349	1.85194	3.66678	2.45744	1.55841	1.51133	1.26692	1.44455	1.64253
chrIII:7495322-7497766:-	cgh-1	C07H6.5	WBGene00000479	0.319827	0.0160723	0.0769354	0.00302455	5.86536e-06	0.0584149	0.67215	0.315176	0.114294	0.23524	-0.222221	0.275564	0.391793	0.256156	0.0715122	0.162829	433.503	465.736	336.478	453.601	504.023	472.325	414.389	442.086	439.348	435.71
chrV:118043-122966:-	cgp-1	Y38C9A.2	WBGene00000480	0.297698	0.155404	2.38989e-05	0.0349131	0.0184752	0.579883	0.750752	0.554824	0.120357	0.157463	-0.534606	0.210037	0.221889	0.131977	0.0662584	0.13144	57.7572	58.4799	37.5507	57.444	59.3216	60.4659	57.718	60.4555	61.3976	57.7906
chrIV:3613782-3624692:-	cha-1	ZC416.8	WBGene00000481	0.723614	0.622932	0.982505	0.868992	0.574543	0.365274	0.744105	0.192795	-0.165899	-0.230356	-0.0143358	0.0840743	0.229303	-0.428065	-0.159127	-0.528025	1.25577	1.16382	2.05136	1.48558	1.71412	1.43342	1.81214	1.30773	2.31836	1.59503
chrX:12846360-12852531:-	chd-3	T14G8.1	WBGene00000482	2.28777e-26	2.71625e-18	0.344033	8.10715e-22	2.37998e-12	0.857944	0.0317653	0.791869	1.11387	0.932964	0.174819	1.0184	0.747733	-0.0665326	0.332843	0.0823956	24.0993	20.8982	16.5992	21.036	17.7633	13.9433	18.5992	15.5245	16.3176	11.8649
chrI:6517576-6520880:-	che-1	C55B7.12	WBGene00000483	NA	NA	NA	NA	NA	NA	NA	NA	-0.232898	-0.173646	0.142949	-0.178947	0.222628	0.0577325	0.0406996	0.109766	0.0752666	0.118296	0.163844	0.110188	0.451324	0.0897296	0.0747412	0.135656	0.0450343	0.296395
chrX:481379-486505:+	che-2	F38G1.1	WBGene00000484	NA	NA	0.942522	0.448316	0.75558	NA	0.384822	NA	-0.346589	-0.211964	0.0533553	-0.333518	0.158384	-0.265227	-0.398317	-0.12889	0.114677	0.160263	0.292123	0.111958	0.302463	0.156973	0.102858	0.207608	0.297598	0.272543
chrI:8062006-8081666:-	che-3	F18C12.1	WBGene00000485	0.885687	0.656329	0.528128	0.641774	0.247521	0.854245	0.484506	0.736132	0.062263	0.170588	-0.218794	-0.167406	0.331182	0.114148	0.230623	0.165885	0.573657	0.618601	0.619924	0.445897	0.678869	0.809948	0.88357	0.83919	0.821977	0.594076
chrIV:2104056-2111605:-	che-6	C23H5.7	WBGene00000487	0.83734	0.0130663	0.820872	0.843147	0.951693	NA	0.715014	NA	0.11827	0.92806	0.133431	-0.109728	0.0374508	-0.0893397	0.194641	-0.111445	0.262232	0.850714	0.290492	0.145747	0.217672	0.162807	0.330389	0.145535	0.228436	0.221423
chrV:7961298-7965809:-	che-7	F26D11.10	WBGene00000488	0.497009	0.656639	0.790402	0.92896	0.498468	0.835212	0.923858	0.849654	0.330796	0.243466	0.16814	-0.0566975	0.314387	-0.196084	0.0697031	-0.16351	0.721826	0.641623	0.805192	0.406876	0.67165	0.507828	0.714801	0.524423	0.730161	0.514317
chrV:12144276-12150670:-	che-11	C27A7.4	WBGene00000490	0.968424	0.612422	0.797273	0.680856	0.511311	0.998981	0.0691547	0.989617	-0.0263536	0.265132	0.160345	-0.210625	0.299227	0.00285333	0.742176	0.0162571	0.286801	0.393207	0.365614	0.213381	0.390676	0.305532	0.682562	0.309698	0.3379	0.32223
chrV:10299448-10307329:-	che-12	B0024.8	WBGene00000491	0.598729	0.553244	0.515081	0.0644121	0.309435	0.979525	0.950799	0.606524	-0.231506	-0.265845	0.298353	-0.640447	-0.372971	0.0314979	0.0396816	-0.308349	0.75521	0.72329	0.935714	0.480473	0.634583	0.73865	0.740612	0.532799	0.797034	1.01396
chrI:10506989-10515495:-	che-13	F59C6.7	WBGene00000492	0.0883692	0.299168	0.879155	0.00278825	0.0722463	0.421095	0.758296	0.988632	-0.645074	-0.441861	0.0994523	-1.02843	-0.63729	-0.467365	-0.179359	-0.0176417	1.20832	1.47053	1.83955	0.731378	1.16878	0.99616	1.37947	1.63761	1.85783	2.4713
chrI:5746728-5754281:+	che-14	F56H1.1	WBGene00000493	0.442693	0.00205167	0.243159	0.664207	0.0897849	0.83787	0.00314501	0.934303	0.324633	0.999088	0.472317	0.200639	0.5778	0.169044	0.990857	0.0714201	0.860106	1.56264	1.24197	0.71455	1.03661	0.933561	1.96672	0.853506	0.883064	0.677707
chrI:7554888-7559912:+	chs-1	T25G3.2	WBGene00000496	0.134007	0.00144124	0.000142789	1.18833e-09	0.0385504	0.594033	0.863276	0.649035	0.134119	0.251218	-0.499863	0.439609	0.166999	0.132319	0.0410308	0.113309	169.422	181.485	115.913	196.014	165.78	182.296	170.768	179.831	184.959	167.986
chrII:203459-211924:+	chs-2	F48A11.1	WBGene00000497	0.883505	0.367906	0.0222008	0.646591	2.04006e-08	0.328353	0.0458278	0.292989	0.0735315	0.342188	0.726113	0.18869	1.43893	0.437732	0.647009	0.445563	0.57405	0.717113	1.56617	0.594843	1.69275	1.22339	1.46379	1.23542	0.932896	0.584552
chrV:3756767-3759455:-	chk-1	Y39H10A.7	WBGene00000498	0.135581	0.341237	0.103952	0.00290385	0.136126	0.41118	0.963796	0.573274	0.168063	0.120627	-0.272886	0.293306	0.158333	0.192214	0.0136615	0.144531	53.5059	51.0657	37.9465	54.5732	50.8082	53.0858	46.6616	51.2654	51.5279	51.7585
chrV:19908859-19915942:-	chk-2	Y60A3A.12	WBGene00000499	0.583008	0.755139	0.493231	0.223316	0.0434637	0.943751	0.741262	0.000304621	-0.111545	0.0727802	-0.163656	0.207973	0.29777	0.0385172	-0.0909475	0.61225	16.0757	18.1245	16.0549	18.8939	20.655	18.6173	16.912	28.2594	20.1672	18.982
chrI:6181316-6183882:-	chn-1	T09B4.10	WBGene00000500	0.964745	0.853632	0.0121414	0.904227	0.125054	0.679938	0.00284732	0.983005	-0.00867025	-0.0343437	-0.347424	-0.0219024	-0.178321	-0.109173	-0.399582	0.00870535	75.3135	73.0299	52.9326	69.6658	63.8532	62.7705	51.013	68.3408	75.7538	82.5413
chrIV:13209705-13214542:-	cho-1	C48D1.3	WBGene00000501	0.994191	0.506347	0.580214	0.225337	0.875456	0.393333	0.844881	0.791932	0.00379079	-0.263278	0.235549	-0.410183	-0.0706216	-0.40082	-0.101588	-0.169476	2.46793	1.93968	3.11515	1.62249	2.21376	1.80461	2.34063	2.20445	2.84869	2.68021
chrI:5103583-5104919:-	chp-1	Y110A7A.13	WBGene00000502	0.872424	0.873774	0.292517	0.641775	0.587102	0.80846	0.391058	0.236609	-0.0291015	-0.0301978	-0.156905	0.0697553	-0.0766778	0.0693427	-0.1337	0.191177	65.9481	65.0735	52.7719	66.0112	60.9685	61.9506	53.6621	67.6047	65.8379	73.3294
chrX:3397594-3400003:-	cht-1	C04F6.3	WBGene00000503	0.0160005	1.32183e-08	0.121923	1.28549e-17	0.968855	0.00308723	0.0394445	0.241755	0.726319	1.53046	-0.608849	2.20446	0.0205074	1.07275	0.757309	0.544654	10.1901	19.834	1.66142	32.85	5.25517	8.62025	6.4852	5.31241	3.50483	5.84711
chrIII:2394319-2401298:-	cic-1	H14E04.5	WBGene00000506	0.716146	0.810761	0.062921	0.99182	0.0442638	0.698378	0.00547668	0.973605	0.076904	-0.0568181	-0.378911	0.00414309	-0.296682	-0.14668	-0.529486	-0.0170461	27.2778	24.4556	17.0909	24.1961	19.9216	20.3112	15.2848	22.3562	25.2608	28.1081
chrIII:8005761-8009756:-	cit-1.1	F44B9.4	WBGene00000507	0.0736819	0.287786	0.825661	0.0453384	0.0694372	0.0397204	0.240193	0.161921	0.320778	0.21709	0.0636908	0.347526	0.307483	0.399643	0.236837	0.297349	15.9983	14.6522	12.69	15.2217	15.1463	16.2084	14.4084	15.0566	13.517	13.7765
chrIII:8010713-8013706:+	cit-1.2	F44B9.3	WBGene00000508	0.10592	0.166199	0.734566	0.380998	0.138087	0.181794	0.394329	0.000908421	0.236626	0.213505	0.0893745	0.142536	0.208296	0.293257	0.181612	0.547647	26.234	25.4679	21.8625	22.8865	24.576	25.321	23.3751	30.4914	22.8296	24.1167
chrIV:9731718-9737602:-	cka-1	C28D4.2	WBGene00000509	0.49165	0.0177176	0.951014	0.513837	0.0290453	0.000307129	1.78043e-05	0.049857	0.111364	0.303954	0.015886	0.104465	0.267827	0.457824	0.512833	0.28196	39.0919	44.2985	34.7909	36.3107	41.776	47.6312	49.5762	42.0669	38.3763	39.3281
chrX:4286713-4291466:+	cka-2	C52B9.1	WBGene00000510	0.36368	0.51153	0.961283	0.0586993	0.5023	0.669	0.506801	0.649035	-0.283416	-0.226358	0.0275105	-0.513248	-0.208198	-0.232926	0.244258	-0.230792	3.63186	3.75226	4.15454	2.81758	3.68706	3.35976	4.95311	3.37167	4.5366	4.95974
chrIII:4365347-4367441:+	ckb-1	B0285.8	WBGene00000511	0.735924	0.851422	0.860545	0.282123	0.955928	0.546956	0.33293	0.606006	0.13141	0.0841258	-0.0880934	-0.344343	0.0247338	-0.300779	-0.345997	-0.261217	5.01181	4.76254	4.56563	3.15345	4.3918	3.8429	3.68931	3.96596	5.49052	4.90575
chrIII:4367804-4370132:+	ckb-2	B0285.9	WBGene00000512	3.06321e-06	0.0974849	0.602718	0.927377	0.0839584	0.313203	0.164171	0.0451557	0.743031	0.321964	-0.139521	0.0273447	-0.313865	0.269822	0.294964	0.41311	24.3724	17.6897	11.3635	13.4704	10.7441	15.3945	15.6785	17.1024	14.0698	15.4194
chrIII:4370857-4372792:+	ckb-3	B0285.10	WBGene00000513	NA	NA	NA	NA	NA	NA	NA	NA	-0.195536	0.132806	0.100181	-0.194373	-0.0965852	-0.049191	-0.146073	-0.120377	0	0.205712	0.26337	0	0.0550621	0.133257	0.0554989	0.0783588	0.197669	0.126497
chrV:2106397-2109386:-	ckb-4	F22F7.5	WBGene00000514	0.492833	0.662406	0.675742	0.643465	0.980238	0.685254	0.277558	0.658888	-0.206557	-0.148649	-0.145797	-0.145824	0.00992905	-0.187375	-0.307503	-0.188117	6.46432	6.67844	7.2109	6.32783	7.30403	6.97999	6.36002	6.98542	8.99903	8.262
chrX:3576595-3578944:+	ckc-1	T27A10.3	WBGene00000515	0.00548322	0.0512977	0.000716628	0.0349383	0.000682123	0.0379742	0.0451349	0.452553	-0.431367	-0.326569	-0.568466	-0.339554	-0.490704	-0.4053	-0.364195	-0.198299	16.2824	17.3666	14.6232	16.2715	14.9213	16.4936	16.9752	19.1757	24.7136	24.2616
chrII:7811189-7812052:+	cki-1	T05A6.1	WBGene00000516	0.000268236	3.99421e-05	0.00294044	0.0875108	0.914409	0.887899	0.00235464	0.073432	0.901504	1.00928	0.843609	0.483352	0.0456639	0.107279	0.853965	-0.617332	10.5411	11.3333	10.7323	7.08276	5.09811	5.89015	10.8514	3.12426	6.00816	5.54154
chrII:7816458-7820227:+	cki-2	T05A6.2	WBGene00000517	0.323599	0.157526	0.572682	0.582994	0.233668	0.950416	0.939181	0.781227	0.178887	0.243245	-0.133829	0.108904	0.195252	0.0336261	-0.025175	0.0969475	23.2463	24.0412	16.8115	20.6283	22.484	18.9869	18.1926	19.8784	20.6747	22.2392
chrIII:5635437-5654514:+	ckk-1	C05H8.1	WBGene00000518	0.770012	0.862608	2.42776e-16	0.0287839	0.754165	0.725676	0.875424	0.649058	-0.107159	-0.0719232	1.73294	-0.567407	0.107099	-0.188939	0.0704295	-0.210832	3.42755	3.47798	13.6902	2.21187	3.87056	3.09783	3.82878	3.06355	4.03437	4.06543
chrIII:11154726-11168710:+	cku-70	Y47D3A.4	WBGene00000519	0.368051	0.546869	0.49293	0.0772468	0.287145	0.912029	0.19926	0.932558	0.122173	0.0920594	-0.137806	0.207756	0.13188	0.0460455	-0.222968	0.0313973	36.4951	35.2404	30.7646	36.2357	35.1413	35.1052	28.9291	34.7448	37.8911	36.4535
chrIII:4419820-4423344:+	cku-80	R07E5.8	WBGene00000520	0.198763	0.245123	0.452227	0.000252388	0.217117	0.0169011	0.517745	0.260776	0.180835	0.170535	-0.128373	0.424091	0.165329	0.337234	0.11207	0.195807	34.8454	34.1509	28.5175	38.6729	32.9591	39.7495	33.8637	35.9479	34.8709	33.3677
chrV:12736686-12741194:+	cky-1	C15C8.2	WBGene00000521	NA	NA	0.562933	NA	NA	NA	NA	NA	0.125226	0.471168	0.222702	-0.0453095	0.022267	0.160746	0.690155	-0.0632691	0.0670346	0.19967	0.0845089	0.0135698	0.0356242	0.0639703	0.286488	0	0.016053	0.0296237
chrX:11047349-11049166:+	clc-1	C09F12.1	WBGene00000522	0.957955	0.000142087	0.555678	0.115238	4.70555e-06	0.105023	0.58021	0.029763	-0.0183943	-0.755187	-0.195035	-0.350215	-0.849413	-0.477406	-0.183491	0.560083	30.6269	17.2897	22.1199	22.2546	15.6445	17.7164	22.2938	39.5683	28.6877	33.805
chrX:7431425-7433490:+	clc-2	C01C10.1	WBGene00000523	0.215822	0.571901	0.838606	0.782634	0.787425	0.991732	0.818913	0.704015	0.460575	-0.260042	0.124167	-0.132818	-0.126712	0.0133936	0.135593	-0.260023	4.97278	2.54147	3.14145	2.71933	2.80504	2.80326	3.18474	2.1405	3.10676	3.58899
chrX:3373234-3374727:-	clc-3	ZK563.4	WBGene00000524	0.564289	0.696257	0.23822	0.95399	0.568651	0.41371	0.414479	0.502328	-0.240506	-0.180737	-0.43978	-0.030911	-0.224437	-0.399769	-0.329004	-0.338934	3.737	3.89444	3.93604	4.22303	3.63481	4.07428	4.34049	4.30022	6.43104	5.0419
chrX:10782931-10783842:-	clc-4	T05A10.2	WBGene00000525	0.705905	0.0544359	0.776315	0.813477	0.978931	0.898909	0.0861365	NA	0.202937	0.776359	-0.168727	-0.132961	0.0174831	-0.127972	0.698862	0.144969	1.48053	2.95435	0.518653	0.810698	1.09393	0.578711	2.41614	1.03774	0.869035	1.18909
chrX:7433587-7435688:+	clc-5	C01C10.4	WBGene00000526	0.39486	0.850122	0.239481	0.99966	0.797725	0.882082	0.513596	0.643476	0.335741	-0.101974	0.468161	-0.000356304	-0.119716	0.130278	0.295958	0.284012	3.47667	2.31492	3.3405	2.40138	2.21492	2.4449	2.86175	2.8282	2.41372	2.80974
chrI:8705681-8724273:-	cle-1	C36B1.1	WBGene00000527	0.555064	0.570392	0.0343026	0.93414	0.195443	0.578955	0.0506726	0.971522	-0.0788828	0.0788571	-0.274869	0.014099	-0.139294	0.121238	0.253922	-0.0118911	21.6879	23.9297	19.0833	21.6361	19.8731	25.2844	27.7924	23.0018	25.8767	24.9728
chrII:11846445-11854680:-	clh-1	T27D12.2	WBGene00000528	0.995425	0.671027	0.856606	0.262042	0.0139637	0.155485	0.503388	0.830281	0.00155517	-0.0902342	0.0444957	0.186335	0.33919	-0.260039	-0.127068	0.0666798	13.8525	12.8012	19.1819	14.7775	16.8828	15.4246	16.9584	19.4934	20.7205	15.0706
chrII:11358383-11370248:+	clh-2	B0491.8	WBGene00000529	0.956163	0.570392	0.485847	0.83115	0.389954	0.977716	0.259697	0.814705	-0.0312883	0.261588	0.30707	-0.108019	0.331388	0.03256	0.440869	-0.16933	0.998665	1.29894	1.39375	0.874093	1.33297	1.09214	1.56744	0.904311	1.17988	1.12107
chrII:7217914-7225607:-	clh-3	E04F6.11	WBGene00000530	0.86374	0.060976	0.880434	0.753887	0.531658	0.955314	0.00439921	0.348025	0.0325146	0.233298	-0.0437126	0.0523521	0.0897153	0.0293686	0.460033	0.219631	14.7075	16.7399	13.7627	13.9287	14.6468	14.5175	19.8415	16.6673	15.8492	15.6563
chrX:4094847-4100512:-	clh-4	T06F4.2	WBGene00000531	0.576692	0.562986	0.947872	0.200452	0.524262	0.755847	0.430163	0.702541	-0.244268	-0.262272	-0.0432595	-0.476663	-0.25791	-0.221789	-0.332996	-0.237154	0.863188	0.838713	1.23378	0.644749	0.814979	1.05249	0.95303	1.04025	1.43152	1.17471
chrII:9094618-9098784:-	clh-5	C07H4.2	WBGene00000532	0.0687979	0.310044	0.164843	0.000189446	5.07992e-05	0.015884	0.376595	0.0204995	0.208946	0.134172	-0.175695	0.377848	0.395153	0.290242	0.122436	0.273494	42.9555	40.2004	36.6152	45.1867	46.8604	50.9062	45.2172	50.3049	46.2476	40.3565
chrV:12060215-12063349:-	clh-6	R07B7.1	WBGene00000533	0.524233	0.545744	0.17444	0.0618348	0.979523	0.886487	0.476461	0.640084	0.0846101	0.0838483	-0.209359	0.197656	-0.00451191	0.0499093	-0.125751	0.113353	33.33	32.8958	25.7152	33.7156	29.929	30.9404	27.3056	32.3871	33.3261	34.1981
chrV:6044045-6045654:+	cpi-2	R01B10.1	WBGene00000534	0.965352	0.375494	0.796256	0.893564	0.411198	0.56426	0.192956	0.026336	-0.00856828	-0.12538	-0.0609629	0.0237427	-0.107091	0.146029	0.215807	0.344884	84.8859	77.1138	68.3487	81.1257	75.6971	79.3079	83.3858	91.4378	79.6139	93.0383
chrIV:6092587-6093636:-	cpi-1	K08B4.6	WBGene00000535	0.390826	0.0001927	0.00771716	0.00139376	0.00109821	0.813971	0.0318941	1.37346e-08	-0.115637	-0.393706	-0.339625	-0.339083	-0.33289	0.0691873	0.278493	0.631356	173.359	140.609	114.199	138.291	142.143	152.771	177.43	227.943	162.311	204.957
chrIII:5277855-5279324:+	clk-1	ZC395.2	WBGene00000536	0.510392	0.079277	0.505971	0.460892	0.015602	0.850109	0.216039	0.614617	-0.128193	-0.289015	-0.149528	-0.137926	-0.349326	-0.0772525	-0.241786	-0.147572	39.9579	35.1333	36.1892	37.0956	32.5732	38.1934	33.8561	36.2759	45.0523	47.7556
chrIII:7515157-7518458:-	clk-2	C07H6.6	WBGene00000537	0.854546	0.632	0.101658	0.321539	0.556683	0.949825	0.0306263	0.947456	-0.030884	0.0716788	-0.244857	0.12155	-0.076888	0.0274771	-0.307692	-0.0227598	28.9069	30.671	23.4051	30.0755	26.7592	28.4375	22.3748	27.4365	31.1106	32.1848
chrV:11263504-11265632:-	cln-3.1	F07B10.1	WBGene00000539	0.879507	0.0710722	0.904473	0.508661	0.845228	0.99475	0.390127	0.999138	-0.0538904	-0.432754	0.0520505	-0.182827	-0.0626672	-0.00633205	-0.259252	-0.00177826	7.52163	5.54913	7.43933	6.36229	7.14118	7.12471	5.83974	7.13056	7.96694	8.5338
chrI:5274699-5278711:-	cln-3.2	C01G8.2	WBGene00000540	0.612007	0.349844	0.866233	0.365372	0.300763	0.998981	0.732485	0.953373	0.124628	-0.214446	-0.0604908	-0.199183	-0.210484	-0.00105894	-0.108756	-0.031003	13.4011	10.3005	10.1054	9.84594	10.0136	10.5747	9.75094	10.3307	11.8029	13.3217
chrV:8682943-8686140:+	cln-3.3	ZC190.1	WBGene00000541	0.682744	0.895224	0.578443	0.862324	0.096847	0.995415	0.81347	0.981159	-0.139674	-0.0550687	0.209263	-0.0654951	0.403546	-0.00641718	-0.105334	-0.0190996	5.41331	5.71636	6.6596	5.36791	7.88574	5.61232	5.17012	5.537	6.27854	6.57655
chrIII:7981009-7986272:+	clp-1	C06G4.2	WBGene00000542	0.420556	0.677296	0.86897	0.399331	4.43672e-07	0.806692	0.546006	0.340336	0.256689	-0.156583	0.102753	0.262549	1.15026	0.204041	0.291714	0.484633	15	10.6179	16.2278	14.0728	29.0356	17.9487	19.5695	23.6143	16.3184	13.3018
chrIII:4700290-4704019:-	clp-2	T04A8.16	WBGene00000543	0.82223	0.814419	0.407919	0.496191	0.343234	0.344753	0.741025	0.376491	0.0429267	-0.0462776	-0.14721	0.106089	-0.133458	0.191855	0.0706946	0.177704	29.2793	27.1547	22.6565	28.5966	24.6895	28.8976	26.5036	28.6134	28.1094	30.9279
chrI:12073062-12084212:-	clp-3	Y47H10A.1	WBGene00000544	0.00601301	0.196989	0.192362	0.527882	0.0665551	0.99143	0.836175	0.914782	0.789912	0.441627	-0.482998	-0.244393	0.539701	0.0126271	-0.110618	-0.082415	2.68332	1.99082	1.58566	1.03379	2.08483	2.45763	2.2102	2.26851	2.71693	1.50186
chrIII:1807725-1818314:-	clp-4	Y39A3CL.5	WBGene00000545	0.000989384	0.00121371	0.0602962	0.000256551	3.25449e-15	0.354508	1.22645e-07	1.87786e-07	0.561683	0.560198	0.317023	0.61216	1.17671	0.21636	0.749621	0.738615	10.37	10.2149	16.3229	10.0505	15.5181	15.1607	22.3038	22.1261	14.4516	7.45392
chrIV:1431179-1435017:-	clp-6	Y77E11A.10	WBGene00000546	0.0701803	0.0545637	0.189569	0.576652	0.00751996	0.0727903	0.897084	0.122887	-0.477712	0.490342	-0.377527	-0.178365	0.602932	-0.534231	0.0576354	-0.465016	2.72063	5.75781	7.39744	3.23664	6.06496	6.55177	10.3883	6.90653	11.0783	4.33937
chrIV:1435466-1446026:-	clp-7	Y77E11A.11	WBGene00000547	0.436848	0.488835	0.0964049	2.92196e-08	4.00219e-17	0.439343	0.756812	0.0104576	0.130649	-0.12512	-0.351106	0.658468	0.93669	0.233327	0.0928972	0.509493	15.226	12.5009	14.7881	20.7326	25.872	22.8076	20.5569	27.9529	21.4022	15.1009
chrII:5466346-5473788:+	clr-1	F56D1.4	WBGene00000548	1.22794e-05	0.00354464	0.515081	8.00718e-07	2.79729e-07	0.0262008	0.0437451	0.02614	0.42048	0.299747	-0.103106	0.46734	0.474018	0.289003	0.247571	0.2801	46.8414	42.4754	35.964	45.2097	46.5094	47.4914	46.1285	47.1989	43.1624	37.9025
chrIII:9054974-9058804:+	cls-2	R107.6	WBGene00000549	0.942576	0.00257549	0.602746	0.124536	0.0329596	0.464483	0.594898	0.360902	0.0122777	0.304623	-0.10433	0.172017	0.216616	0.166669	0.104809	0.186428	38.6343	46.8532	33.4688	40.3969	42.6813	40.6411	38.8848	41.2165	40.2259	41.719
chrIII:9516565-9521376:-	clu-1	F55H2.6	WBGene00000550	0.00778899	0.424516	0.0788054	0.314638	0.282789	0.924928	0.00107888	0.312163	-0.201569	-0.0783128	-0.161093	-0.0901619	-0.0919657	-0.0225256	-0.26802	-0.119238	127.553	137.274	127.066	128.825	131.728	140.033	117.881	130.848	158.684	160.005
chrIV:7734635-7736397:+	clx-1	C50F7.2	WBGene00000551	NA	NA	NA	NA	NA	NA	NA	NA	-0.0784018	0.00357754	NA	-0.0781321	-0.0516176	NA	NA	NA	0	0.0377141	0	0	0.0120225	0	0	0	0	0.0400364
chrV:1156272-1158064:+	cmd-1	T21H3.3	WBGene00000552	0.0199521	0.0251895	0.0550536	0.00119986	4.77135e-18	0.0548655	0.0120206	0.272545	0.290796	0.285551	0.235447	0.382432	0.908211	0.256244	0.29223	0.171292	103.125	101.398	126.401	102.775	152.917	128.209	131.559	120.749	119.269	91.2936
chrIV:1824527-1834028:+	cmk-1	K07A9.2	WBGene00000553	0.917047	0.902785	0.161732	0.972504	0.0406815	0.555579	0.978504	0.954684	0.0643819	0.077122	0.591514	-0.0224235	0.752205	0.383046	0.0207305	-0.0553155	0.816844	0.817606	2.00589	0.689034	1.61473	1.61273	1.10255	1.01359	1.20025	0.820154
chrV:11375724-11378039:+	cnb-1	F55C10.1	WBGene00000554	0.354465	0.14162	0.900562	0.0537032	0.00385753	0.456053	0.424113	0.438685	-0.170124	-0.252976	0.0394834	-0.306036	-0.411874	-0.206973	-0.1779	-0.205656	23.9188	22.2335	26.2125	20.2557	19.2039	21.8818	22.3407	21.9059	28.3804	29.4673
chrV:1443970-1444286:-	cnc-1	R09B5.2	WBGene00000555	NA	NA	NA	NA	NA	NA	NA	NA	-0.088847	0.0485888	0	-0.0421843	-0.062288	0.0559035	0	0	0	0.370762	0	0.116327	0.0738998	0.0808825	0	0	0	0.258172
chrV:1449667-1450189:-	cnc-2	R09B5.3	WBGene00000556	NA	NA	0.8443	0.887929	0.884415	NA	0.305517	NA	0.117258	0.0831188	-0.116802	-0.0773503	-0.0799272	0.243309	0.434615	0.372536	1.38238	1.27569	0.409333	0.827965	0.858664	1.23616	1.83813	1.62077	0.705441	1.17346
chrV:1448031-1448794:+	cnc-3	R09B5.8	WBGene00000557	0.021701	0.256201	0.850681	0.0564787	0.00968548	0.00741571	0.136511	9.25302e-05	0.740443	0.435067	0.11667	0.634361	0.782848	1.00928	0.596861	1.31612	9.62182	7.2593	3.68609	8.20208	9.50018	8.81749	6.02178	11.6143	3.56014	5.31933
chrV:1447222-1447707:+	cnc-4	R09B5.9	WBGene00000558	0.762951	0.0381495	0.0244378	0.000932729	0.00244361	0.0333705	0.0017113	0.00237529	0.159225	0.773662	0.893577	1.11415	1.00253	0.919197	1.1683	1.16383	2.95706	5.58452	8.09615	7.27308	6.63797	8.28063	10.8542	10.8013	2.76428	2.64253
chrV:1445381-1445832:+	cnc-5	R09B5.10	WBGene00000559	NA	NA	NA	NA	NA	NA	NA	NA	NA	NA	0	NA	NA	0.0559035	0	0	0	0	0	0	0	0.105108	0	0	0	0
chrIII:1763515-1764892:+	cnc-6	Y46E12A.1	WBGene00000560	NA	NA	NA	NA	NA	NA	NA	NA	0.0434979	0.045063	0	0	0.0634686	0.0581872	0.080278	0.0713004	0.0673294	0.0697106	0	0	0.0894873	0.0948034	0.139497	0.12147	0	0
chrIII:5240554-5242069:-	cnd-1	C34E10.7	WBGene00000561	NA	NA	NA	0.0922008	0.9221	NA	NA	NA	0.187865	0.175891	-0.0128452	0.560328	-0.0489057	0.00276431	0.0382458	0.192856	0.354548	0.335623	0.0716486	0.786639	0.13165	0.0831492	0.119047	0.278815	0.0901232	0.174044
chrV:15025723-15031456:-	cng-1	F14H8.6	WBGene00000562	0.401829	0.687004	0.868405	0.454819	0.266602	0.424029	0.674099	0.328937	-0.390601	-0.223629	-0.110164	-0.351364	-0.468797	0.470761	0.233091	0.520673	0.375812	0.464399	0.440664	0.371236	0.325714	0.827312	0.649506	0.87201	0.558119	0.673571
chrIV:9477505-9481020:-	cng-3	F38E11.12	WBGene00000563	NA	NA	0.893061	0.999267	0.990436	NA	0.983214	NA	0.0567164	-0.308291	0.08454	-0.000938179	0.00658075	-0.0572756	0.0141589	-0.0590292	0.221105	0.0659707	0.243031	0.181569	0.186688	0.168484	0.205835	0.170764	0.222559	0.211545
chrIII:10271166-10278488:+	cnk-1	R01H10.8	WBGene00000564	1.76148e-05	1.40363e-12	0.729796	1.73266e-08	3.35518e-15	7.18448e-05	2.24565e-07	0.00154784	0.580115	0.906856	0.0797855	0.736699	0.975354	0.566794	0.692248	0.463547	17.97	22.4176	16.3854	18.7627	22.8169	23.2454	25.4507	21.586	17.2453	12.8676
chrII:12072006-12088797:-	cnt-1	Y17G7B.15	WBGene00000565	0.011451	0.107734	0.424604	0.314203	0.000176889	0.13184	0.108693	0.329184	0.335606	0.237917	0.179931	0.158231	0.449762	0.328958	0.307684	0.240817	13.7699	12.6707	12.5185	11.328	14.2817	13.926	13.7408	13.0803	12.2292	11.791
chrIII:10655671-10677423:+	cnt-2	Y39A1A.15	WBGene00000566	0.6999	0.510498	0.84304	0.0874806	0.179529	0.441766	0.943413	0.69652	0.054565	0.0882293	-0.0459526	0.181051	0.142449	0.164192	0.0187149	0.0993274	26.0991	26.3716	23.8665	26.671	26.5554	27.7334	24.9982	26.4756	27.5091	27.3583
chrIII:9814296-9817050:-	cnx-1	ZK632.6	WBGene00000567	0.401992	0.989811	0.0113144	0.0642534	0.0299296	0.186697	0.232759	0.829297	0.0810018	-0.00184594	-0.246012	0.151886	-0.168	0.163938	0.13238	0.0449185	144.352	134.417	105.926	141.709	115.937	141.334	138.254	130.013	140.499	148.568
chrI:6250573-6252823:+	cof-2	C48E7.5	WBGene00000583	0.278871	0.803431	0.489139	0.228414	0.32333	0.537246	0.696166	0.893305	-0.402258	-0.123527	-0.302532	-0.432991	-0.349885	-0.34488	-0.190759	0.102418	2.21284	2.80821	2.25041	2.02235	2.22356	2.16547	2.49223	3.22571	3.29441	3.44774
chrII:14902417-14907457:+	cog-1	R03C1.3	WBGene00000584	0.808064	0.877591	0.389428	0.965355	0.435984	0.939472	0.508934	NA	0.132514	0.0940219	0.42225	-0.026564	0.336232	0.0885812	0.33827	0.0492523	0.571878	0.521975	0.973078	0.380244	0.778733	0.585862	0.863115	0.544448	0.547039	0.469348
chrIV:7036949-7039569:-	cogc-2	C06G3.10	WBGene00000585	0.858527	0.80472	0.00531572	0.780085	0.0255481	0.941915	0.44981	0.504754	0.0272734	0.0370106	-0.354131	0.0383718	-0.206772	-0.0281994	-0.123154	-0.134419	60.915	60.5606	44.8717	57.323	49.4047	56.616	52.8898	52.4672	64.4088	65.0964
chrX:7465220-7475249:-	coh-1	K08A8.3	WBGene00000591	3.80752e-16	1.50084e-07	0.740036	0.0404253	0.0756123	0.953369	0.513132	0.997499	0.980112	0.672702	-0.0944895	0.300195	0.253636	-0.0341249	0.1578	-0.0026266	16.8171	13.326	7.54951	9.66078	9.56195	7.88002	9.09211	8.07899	9.03148	9.06755
chrV:14457460-14460126:+	coh-3	F08H9.1	WBGene00000592	0.819124	0.241381	0.564156	0.936589	0.00204552	0.0915267	0.382953	0.668106	0.0400219	0.156864	-0.112816	0.0153957	-0.328113	0.284343	0.153519	0.110373	28.3012	30.347	22.1427	25.9764	20.8444	29.4332	26.8069	25.9837	26.7836	29.9637
chrIV:10084421-10085417:-	col-2	W01B6.7	WBGene00000593	0.700795	0.739316	0.706431	0.839235	0.654934	0.894285	0.357004	NA	-0.205778	-0.191136	0.222305	0.11662	-0.225674	0.137359	0.442089	0.273026	0.716252	0.721755	0.864706	1.07127	0.672244	0.757389	1.18999	0.928107	0.652042	1.06179
chrIV:8824791-8826000:+	col-3	T28C6.6	WBGene00000594	0.776783	0.802903	0.000353184	0.847555	0.00140685	0.626222	0.497286	0.0261401	-0.117962	-0.111041	1.17504	0.0826409	0.837528	0.309831	0.305935	-0.823878	27.3572	27.1208	134.737	30.2124	57.3449	61.3062	61.0843	20.2071	51.0317	32.879
chrI:7401672-7402753:+	col-7	C15A11.5	WBGene00000596	0.0193411	0.0163214	0.00432999	0.614344	0.13519	0.145152	0.0458157	5.00934e-07	-0.7916	-0.819138	1.04228	-0.223077	-0.525147	-0.676464	-0.770568	-1.68628	9.81564	9.42101	102.818	15.7384	12.1248	19.1116	17.2455	5.76048	42.6616	22.4781
chrIII:7019527-7020544:-	col-8	F11H8.3	WBGene00000597	0.847287	0.41212	0.000561647	0.108701	0.954142	0.232456	0.868225	0.518041	0.0349484	-0.119775	-0.394085	-0.197417	-0.0110609	-0.191468	0.0339444	0.123216	1490.54	1316.22	1089.1	1182.08	1380	1257.58	1475.75	1572.22	1606.85	1584.04
chrX:13589965-13591137:+	col-9	F54B11.1	WBGene00000598	NA	NA	NA	NA	NA	NA	NA	NA	0.128808	0.0483477	-0.0330161	0	0.028627	-0.0335014	-0.00107752	0.0206945	0.0910138	0.0325932	0	0	0.0194893	0	0.0313868	0.0526278	0.0362923	0
chrV:9164272-9165284:-	col-10	B0222.8	WBGene00000599	0.00471036	0.139545	1.30733e-06	0.132211	0.00177839	0.383722	0.917312	3.77756e-07	-0.57097	-0.340185	1.23939	-0.333807	0.575271	0.370646	0.0537661	-1.32709	11.7566	13.8333	61.8981	13.1825	26.4901	30.8256	23.8043	7.3786	25.4016	19.7033
chrV:10423884-10425069:-	col-12	F15H10.1	WBGene00000601	0.0035159	8.59025e-11	2.85456e-06	0.000297236	0.925425	0.641692	0.188444	3.18153e-05	-0.42534	-0.874257	1.21876	-0.51009	0.0220267	-0.248955	-0.426009	-1.11175	51.2836	36.5501	260.471	45.1074	67.7093	79.1891	68.3965	38.5552	108.344	75.9278
chrV:10420867-10421869:-	col-13	F15H10.2	WBGene00000602	0.0123229	5.23595e-07	2.08871e-05	0.0028601	0.945002	0.467537	0.197601	2.10933e-05	-0.391125	-0.726221	1.14448	-0.451865	0.0173866	-0.338093	-0.427118	-1.1538	49.2169	38.058	246.166	44.0445	63.2686	73.2115	67.9435	36.7795	108.03	71.1702
chrIV:7753396-7754635:+	col-14	C46A5.3	WBGene00000603	0.818107	0.941217	3.18218e-07	0.838713	0.000516897	0.0912927	0.129913	0.634784	-0.131557	-0.0485611	1.81303	-0.114684	1.19253	0.796213	0.654769	-0.332051	4.40887	4.81818	85.2668	4.20977	17.6621	27.5614	23.1319	5.05197	10.2319	5.6267
chrII:4866431-4867569:-	col-17	F11G11.10	WBGene00000606	0.487908	0.834138	2.89135e-06	0.85925	0.0106234	0.614451	0.065314	0.587074	0.110828	-0.0425315	0.71432	-0.0344272	0.301977	0.15398	0.327882	-0.155489	56.0087	49.5515	98.5773	47.1864	61.3559	65.6037	74.4326	52.3428	65.3826	56.3909
chrX:421708-422777:+	col-19	ZK1193.1	WBGene00000608	0.923522	0.231524	0.423182	0.205683	0.533386	0.00608347	0.431588	0.0327611	-0.0162586	-0.143042	0.0870997	-0.145013	-0.0794627	-0.244588	-0.0848915	-0.19701	2083.94	1878.63	2312.93	1779.09	1906.75	1832.86	2050.1	1895.06	2426.95	2296.53
chrII:4869602-4870786:-	col-20	F11G11.11	WBGene00000609	0.0599587	0.833345	0.591512	0.405419	1.67223e-05	0.679873	0.190273	0.195764	0.186756	0.0320671	0.0737454	0.0953291	0.367325	-0.0790872	0.146282	0.160981	2328.29	2057.9	2342.05	2040.59	2528.5	2103.07	2464.82	2490.44	2480.09	2223.76
chrIV:4263334-4265195:+	col-33	F36A4.6	WBGene00000610	NA	NA	0.00509984	NA	NA	NA	0.753336	NA	0.121864	0.317047	0.961672	0.0866662	0.130444	0.0257126	0.16457	-0.224337	0.131228	0.308355	1.57337	0.0961509	0.132209	0.202792	0.337106	0	0.191249	0.037465
chrIV:4243541-4244603:-	col-34	F36A4.10	WBGene00000611	0.865452	0.755544	0.0700162	0.708679	0.0296633	0.798474	0.620714	0.423271	0.0615618	0.107915	0.451231	0.117213	0.468005	-0.138272	0.163173	-0.285748	9.68928	9.90933	18.0838	9.45023	12.606	11.5047	14.5027	10.2496	14.2604	10.057
chrI:7385868-7387106:-	col-35	C15A11.1	WBGene00000612	NA	NA	NA	NA	NA	NA	NA	NA	0.0927936	-0.0489268	0.0408325	0.0969805	0.153747	0.107272	0.132894	0.0372628	0.0749266	0	0.024293	0.0731026	0.0994544	0.05953	0.0754252	0.0216628	0	0.0275675
chrII:7167472-7168621:-	col-36	C27H5.5	WBGene00000613	NA	NA	NA	NA	NA	NA	NA	NA	-0.12653	-0.199063	0.0558267	-0.20789	-0.0867551	0.0948984	0.145634	0.0874759	0.198217	0.139258	0.120052	0.126536	0.217777	0.161382	0.203619	0.147651	0.0772588	0.332923
chrV:12166687-12167734:-	col-37	ZK863.2	WBGene00000614	NA	NA	0.862338	0.965692	0.540684	NA	0.931224	NA	-0.0812647	-0.0496886	0.108539	0.026232	-0.274987	0.102858	0.0584378	0.274919	0.435954	0.459915	0.396484	0.505789	0.26953	0.384754	0.346812	0.567743	0.325574	0.56179
chrII:8567982-8569037:-	col-38	F54C9.4	WBGene00000615	0.567737	0.592061	9.64007e-08	0.0125777	1.07649e-10	0.0289688	0.0586424	0.652683	0.199369	0.197336	1.86624	0.644571	1.43457	0.947606	0.778147	-0.315133	9.33129	9.20397	116.702	12.4605	23.5512	43.6826	35.8592	7.66387	14.3056	8.61851
chrII:10704844-10705961:+	col-39	C09G5.4	WBGene00000616	0.00139003	0.00215097	2.12406e-08	0.783794	0.919835	0.00721368	0.0224932	6.69977e-13	-0.4879	-0.475865	0.877201	-0.0630365	-0.0251729	-0.500218	-0.412429	-1.11156	62.3408	61.9996	244.282	79.4165	83.4022	89.3139	95.1913	56.9609	143.615	96.7846
chrII:1104952-1106980:-	col-40	T13B5.4	WBGene00000617	0.884375	0.963209	0.987268	0.594955	0.626649	0.807253	0.477926	0.953391	0.086348	-0.0308923	-0.0131811	0.252619	0.228655	-0.208986	0.33807	0.055	1.80961	1.57009	1.62996	2.01648	2.00132	1.32905	2.33464	1.75129	1.83618	1.79154
chrX:15174969-15176411:-	col-41	T10B10.1	WBGene00000618	0.764308	0.913784	0.858815	0.914244	0.0675298	0.884615	0.959012	0.991009	0.147249	-0.062322	-0.108544	-0.059964	0.608918	0.131647	-0.0343605	0.0137177	2.00538	1.61743	2.21496	1.54361	2.88545	2.7795	2.37685	2.48294	2.74051	1.90052
chrV:8049724-8050873:-	col-43	ZC513.8	WBGene00000620	0.311184	0.764931	0.023053	0.475661	0.000694909	0.669776	0.18908	0.00020709	0.386534	0.149927	0.823294	0.28746	0.983372	0.292552	0.529282	1.23841	3.20854	2.55229	4.17093	2.73753	5.07559	2.52382	3.16438	6.03905	2.04129	2.44632
chrX:13591428-13592391:+	col-44	F54B11.2	WBGene00000621	NA	NA	0.95569	0.807688	0.871461	NA	0.986723	NA	0.170965	0.128374	0.0377564	0.114349	-0.0805777	-0.0781539	-0.00987792	0.0713833	0.405898	0.359242	0.393067	0.331163	0.179561	0.284155	0.347053	0.431072	0.39738	0.26627
chrI:115739-117502:+	col-45	F53G12.7	WBGene00000622	0.139265	0.422015	0.138906	0.716638	0.91978	0.607206	0.69982	0.868993	0.618839	-0.388194	0.646802	0.19219	-0.0609358	-0.365584	-0.223863	0.146347	1.5678	0.333596	1.56101	0.86508	0.621604	0.299792	0.401147	0.801273	0.696773	0.768091
chrI:741882-745457:-	col-46	Y18H1A.13	WBGene00000623	NA	NA	0.102349	NA	NA	NA	0.621765	NA	0.0794587	0.165215	0.558285	0.12496	0.142392	0.312197	0.213655	0.211753	0.119959	0.18621	0.613937	0.145351	0.158082	0.336597	0.245902	0.244358	0.0702149	0.06736
chrI:745756-748510:+	col-47	Y18H1A.12	WBGene00000624	NA	NA	NA	NA	NA	NA	NA	NA	0	0.0953795	0.185428	0	0.195306	0.135403	0.160175	0	0	0.0605215	0.135938	0	0.115529	0.0964756	0.116388	0	0	0
chrI:3010692-3011661:+	col-48	Y54E10BL.2	WBGene00000625	0.376535	0.539771	6.07251e-08	0.734923	5.6524e-08	0.0353852	0.100492	0.830281	0.335958	0.260816	1.85455	0.149605	1.45055	0.905828	0.68064	-0.178202	4.41809	4.077	41.5116	3.5016	10.6623	15.8794	12.4053	4.27983	6.06126	3.54186
chrI:3137190-3138448:+	col-49	K09H9.3	WBGene00000626	0.845782	0.973582	1.00108e-05	0.927377	0.000411362	0.0984811	0.098073	0.844097	0.114667	-0.0237616	1.6015	0.057035	1.22425	0.784731	0.702777	-0.168458	2.28171	1.70935	45.4182	1.90792	10.5002	16.3176	14.511	2.58138	4.52629	1.97234
chrI:3651233-3652602:-	col-50	T28F2.6	WBGene00000627	NA	NA	0.622849	NA	0.316131	NA	0.532472	NA	0.165385	0.301461	0.23538	0.133738	0.355648	0.115958	0.279284	0.205534	0.163606	0.245626	0.249098	0.136922	0.262403	0.173665	0.281566	0.229432	0.108192	0.0791688
chrI:3654000-3655332:+	col-51	T28F2.8	WBGene00000628	0.911095	0.509621	0.665812	0.728422	0.911498	0.904909	0.539621	0.926463	0.0707193	-0.333974	0.249536	-0.184989	0.0673135	-0.128135	0.323385	0.0887425	0.812167	0.438623	1.0204	0.528721	0.765404	0.611429	1.1217	0.827191	0.814608	0.805407
chrI:4571215-4572788:-	col-52	D1007.2	WBGene00000629	NA	NA	NA	NA	NA	NA	NA	NA	-0.0484464	0.00601661	0.10595	-0.0488337	-0.030934	-0.0637841	0.0847604	0.0244068	0.102286	0.143864	0.152848	0.0925814	0.111038	0.033344	0.136902	0.0910636	0.0798142	0.153138
chrI:5644740-5646373:+	col-53	M01A12.1	WBGene00000630	0.128725	0.942368	0.976873	0.0952656	0.864035	0.824447	0.5759	0.949099	-0.632298	-0.0482091	0.0229108	-0.673067	-0.0994523	-0.207608	-0.301764	-0.0633148	0.69296	1.53285	1.52317	0.608561	1.37841	1.12661	0.982048	1.3666	1.66092	1.78616
chrI:5842717-5844060:+	col-54	F33D11.3	WBGene00000631	NA	NA	0.0190432	NA	NA	NA	0.772421	NA	-0.100824	0.00471512	0.816994	-0.0484216	0.238936	0.473814	0.152467	0.0885435	0.0329469	0.103667	1.30393	0.0632007	0.261334	0.692389	0.267519	0.202511	0.118395	0.110452
chrI:6199143-6200195:+	col-55	T05E7.2	WBGene00000632	NA	NA	NA	NA	NA	NA	NA	NA	0.0451837	0.0540654	0.0503448	0.13889	0.049057	-0.0441043	0.0365966	-0.147978	0.0986749	0.106045	0.262805	0.189098	0.0993146	0.152337	0.251166	0.0461155	0.230914	0.0562872
chrI:6232779-6234282:+	col-56	T08B2.2	WBGene00000633	NA	NA	NA	NA	NA	NA	NA	NA	0	0.0661709	0	0	0	0	0.0620273	0	0	0.0331234	0	0	0	0	0.0317998	0	0	0
chrI:6311253-6312415:+	col-58	F26B1.4	WBGene00000634	0.900509	0.651855	0.00691646	0.49442	0.489007	0.918399	0.868221	0.518395	0.0785054	-0.24476	1.06433	-0.323879	0.320543	0.112692	0.112546	-0.408333	0.922851	0.531838	5.15466	0.433723	1.20096	1.63606	1.62417	0.669251	1.52762	0.894863
chrI:7105318-7106923:+	col-60	F22D6.10	WBGene00000636	0.353384	0.660163	1.46896e-05	0.565552	1.28525e-07	0.359965	0.700109	0.650119	-0.366948	-0.207524	1.58028	-0.242053	1.45838	0.532547	0.224769	-0.320199	2.09337	2.40857	46.3806	2.22345	9.74836	12.9033	8.119	2.73402	6.12222	3.23463
chrI:7202181-7203506:-	col-61	C01H6.1	WBGene00000637	NA	NA	0.507518	0.626011	0.864724	0.800491	0.965977	NA	-0.398694	-0.194565	0.333762	-0.206622	-0.0849763	-0.218818	0.0320242	-0.496354	0.127961	0.308125	1.16327	0.287823	0.404206	0.430199	0.717634	0.170827	0.755423	0.57572
chrI:7403338-7404349:-	col-62	C15A11.6	WBGene00000638	1.69098e-07	2.33861e-08	0.0017091	0.0118406	0.00157211	0.244641	0.0388737	2.82701e-05	-1.09518	-1.178	1.1159	-0.570284	-0.670161	-0.578389	-0.78492	-1.43234	10.7018	9.88157	109.551	15.0822	14.2588	21.399	17.1742	8.20181	42.8053	27.1254
chrI:8243687-8244955:-	col-63	ZK265.2	WBGene00000639	0.900404	0.936219	1.58625e-06	0.940636	0.00979384	0.0391688	0.0766931	0.834536	0.0784772	0.0547586	1.7234	0.0477919	0.938922	0.91925	0.744096	-0.180411	3.14283	2.99436	54.8298	2.7901	10.0773	20.9399	16.5208	2.98094	5.17516	2.97319
chrI:9893689-9895587:-	col-64	F52F12.2	WBGene00000640	0.778274	0.912288	0.610393	0.937284	0.519074	0.951273	0.82432	NA	0.157899	0.0708422	0.274157	0.0506873	0.304433	-0.0743702	0.13854	0.0717845	0.833925	0.726563	0.819199	0.667277	0.961881	0.428112	0.64644	0.569558	0.544727	0.717059
chrI:11489148-11490550:-	col-65	K08C9.4	WBGene00000641	0.980416	0.665203	0.000251563	0.974057	0.000342547	0.357553	0.514078	0.842344	-0.0155084	-0.236309	1.34029	-0.0215666	1.25262	0.522495	0.33049	-0.166527	0.600823	0.366266	14.6942	0.562421	2.85994	4.62469	3.2585	0.836171	1.6562	0.669372
chrII:104534-105819:+	col-68	C50D2.4	WBGene00000644	0.944931	0.813401	0.952877	0.23628	0.705815	0.91377	0.789206	0.765302	-0.0422463	-0.1417	-0.0455012	-0.510596	-0.195992	-0.115599	-0.165198	-0.231031	1.27043	1.10638	1.58142	0.617513	1.00106	1.46307	1.3749	1.27367	1.85392	1.45947
chrII:303924-305530:-	col-69	K01A2.7	WBGene00000645	NA	NA	0.023871	0.948097	0.0519506	NA	0.876399	NA	-0.0854742	-0.0235062	0.870146	-0.0384131	0.6821	0.198602	0.100364	-0.260252	0.182813	0.220227	1.0796	0.200109	0.821782	0.369418	0.29062	0.0714506	0.242971	0.261331
chrII:1470047-1472267:+	col-70	H17B01.2	WBGene00000646	0.763457	0.910307	0.461124	0.482862	0.583237	0.581539	0.337805	0.414743	-0.163597	0.0707527	0.374915	-0.328013	0.257495	0.380017	0.453435	0.473331	0.776801	1.00459	1.04528	0.585066	1.17609	1.04294	1.14285	1.16403	0.723999	1.02415
chrII:3500076-3502452:-	col-71	Y49F6B.10	WBGene00000647	0.774815	0.997418	4.0187e-07	0.597106	4.04891e-05	0.0141077	0.0143153	0.823768	0.15957	0.00208661	1.7838	0.262468	1.40993	1.03016	0.960826	0.188086	3.46749	2.74509	35.2839	3.70959	13.9707	15.5649	14.369	5.26004	4.35065	3.01251
chrII:3520706-3524183:-	col-72	W09G10.1	WBGene00000648	NA	NA	0.355713	NA	0.649668	NA	NA	NA	0.34001	0.0107995	0.348252	-0.0474864	0.178867	0.0402826	0.0785295	-0.0656705	0.444956	0.145721	0.389102	0.0965406	0.271163	0.115045	0.13879	0.031985	0.0818986	0.15239
chrII:4872093-4873122:-	col-73	F11G11.12	WBGene00000649	0.884545	0.824303	3.34132e-10	0.786866	5.71009e-06	0.000562265	0.00502069	0.78716	0.0892659	0.134142	2.12239	0.14809	1.53278	1.31369	1.05891	-0.214198	5.75444	6.03742	106.098	5.80914	27.5978	46.7528	35.5097	6.93624	10.6631	5.55167
chrII:5830848-5831993:+	col-74	ZK1248.2	WBGene00000650	0.978372	0.945137	0.94925	0.800192	0.705232	0.961821	0.986803	NA	-0.017597	-0.0451266	0.0480317	0.138695	-0.193759	-0.0593364	0.0109528	0.271334	0.539694	0.507518	0.581239	0.650217	0.379596	0.474108	0.544284	0.841909	0.593746	0.60636
chrII:6426261-6427481:+	col-75	K03H9.2	WBGene00000651	NA	NA	NA	NA	NA	NA	NA	NA	-0.047741	-0.0473323	0.0495205	-0.0475934	-0.0117987	-0.00632395	0.266786	-0.00757769	0	0	0.0827379	0	0.0223582	0.0319019	0.334972	0.0283124	0.0373137	0.0360297
chrII:8204290-8207522:+	col-76	M110.1	WBGene00000652	0.222619	0.464814	0.00646366	0.909516	0.000447288	0.545956	6.67614e-07	0.0880828	0.310781	0.214005	0.737345	-0.0422777	0.700735	0.282131	1.213	0.536244	6.13259	5.62287	6.79038	4.37782	7.85386	4.72035	9.85643	5.76844	4.15837	5.26436
chrII:8358178-8359328:-	col-77	M195.1	WBGene00000653	0.131654	0.0833393	9.64739e-07	0.15867	2.23612e-13	0.17565	0.45798	0.384154	-0.39888	-0.455629	1.74072	-0.373387	1.44302	0.682825	0.37203	-0.495491	7.57267	7.13728	124.329	7.23861	29.6249	39.4319	26.9439	7.26487	18.1785	11.2868
chrII:9152470-9154249:+	col-78	W07A12.5	WBGene00000654	NA	NA	NA	NA	NA	NA	NA	NA	0	0.0487579	0.15978	0	0.0341572	0.0115071	0.220967	-0.00991964	0	0.0382284	0.192144	0	0.0237504	0.051989	0.263099	0.0345453	0.0442272	0
chrII:10703559-10704515:+	col-79	C09G5.3	WBGene00000655	NA	NA	6.24725e-08	0.769222	0.304273	0.0571308	0.0737862	0.861263	-0.18718	0.207805	1.90341	-0.139585	0.393262	0.866276	0.750333	-0.154056	0.171377	0.581412	5.30625	0.20083	0.777053	1.79246	1.56126	0.343416	0.524404	0.37993
chrII:10707144-10708227:+	col-80	C09G5.5	WBGene00000656	0.757307	0.483266	6.13711e-05	0.843411	0.0521037	0.148714	0.538537	0.00337681	0.0445098	-0.0910806	0.309157	0.0295937	0.192318	-0.149986	0.0677025	-0.24204	1586.53	1421.35	2185.52	1467.75	1684.16	1584.23	1845.3	1485.21	1962.83	1674.95
chrII:11012336-11013720:-	col-81	F38A3.1	WBGene00000657	4.00913e-35	2.78265e-16	0.134909	2.98587e-14	1.29542e-13	2.19754e-13	5.15599e-10	1.04412e-41	-1.19366	-0.812074	0.293682	-0.757905	-0.730438	-1.13389	-0.970434	-1.99057	544.455	704.002	1761.8	693.6	723.675	619.901	698.765	330.573	1585.57	1383.32
chrII:11044077-11045910:-	col-83	F33A8.9	WBGene00000658	0.602093	0.0523207	0.902308	0.1319	0.880522	0.863327	7.93615e-07	0.088858	-0.258809	0.767094	0.0869772	-0.596673	-0.0868552	-0.167399	1.75741	0.771888	0.326907	1.56682	0.420837	0.0806641	0.454387	0.24161	3.42375	1.18228	0.381682	0.602599
chrII:11868472-11869625:+	col-84	K12D12.3	WBGene00000659	0.19063	0.644254	0.971811	0.25135	0.280379	0.990764	0.7858	0.969538	0.554295	0.249406	-0.0278659	0.491739	0.451203	0.0162096	-0.170352	0.0410133	1.60957	1.11457	1.03575	1.40838	1.36632	1.0994	0.839485	1.13899	1.19931	0.886455
chrII:12493636-12495042:-	col-85	T21B4.2	WBGene00000660	0.749846	0.89727	0.831994	0.951072	0.107138	0.495415	0.983066	0.975203	0.1258	0.0604552	0.104707	0.0288127	0.440153	-0.333501	0.0123903	0.0257619	5.23904	4.90165	5.70352	4.51395	6.42828	3.92897	5.2831	5.33822	5.83668	5.14437
chrII:13095939-13098205:-	col-86	Y81G3A.5	WBGene00000661	NA	NA	0.938396	0.233366	0.742276	NA	NA	NA	0.153699	0.053499	0.0438081	0.439292	0.150422	0.0956556	0.0646757	0.137259	0.286338	0.201365	0.173593	0.52351	0.27129	0.222723	0.189621	0.257056	0.148954	0.179206
chrII:14090000-14094615:-	col-87	Y39G8C.4	WBGene00000662	NA	NA	0.20432	NA	NA	NA	NA	NA	0.0861589	0.410177	0.464901	0.257673	-0.0163109	0.167026	0.283249	0.315588	0.0751664	0.237676	0.25252	0.147985	0.0378083	0.0998704	0.152357	0.169261	0.0214774	0.0414768
chrIII:41060-42017:+	col-88	W05G11.3	WBGene00000663	0.287483	0.593619	8.40302e-06	0.660494	7.8893e-09	0.392824	0.558893	0.643055	-0.429726	-0.25499	1.61425	-0.203595	1.66068	0.507799	0.31062	-0.326247	1.71106	2.03135	53.4444	2.05077	10.8255	13.2487	9.72036	2.40348	6.11907	2.90209
chrIII:4748145-4749121:+	col-89	F17C8.2	WBGene00000664	0.806186	0.41661	0.000311167	0.427513	0.852525	0.795085	0.00756578	0.947456	-0.140219	0.388936	1.20373	-0.36675	0.105646	0.2115	0.933297	-0.0586864	1.23608	2.27971	6.39204	0.850083	1.59259	2.5975	5.04921	1.96243	2.30887	1.60448
chrIII:7948773-7950002:+	col-90	C29E4.1	WBGene00000665	0.851444	0.989955	0.000349319	0.915974	0.00246063	0.0342147	0.184709	0.921422	-0.113377	-0.008465	1.32178	-0.0654712	1.08151	0.922143	0.584495	-0.0934586	0.684205	0.798372	5.73074	0.696617	2.82359	3.77444	2.59125	1.06173	1.34242	0.889641
chrIII:8262290-8263593:-	col-91	F09G8.6	WBGene00000666	0.0232726	0.588562	1.34751e-06	0.754842	3.65593e-05	0.458562	0.753919	0.346601	-0.810351	-0.261777	1.73408	-0.154176	1.2501	0.465621	0.191051	-0.526591	0.981143	1.8281	31.9896	1.93155	6.92595	7.3824	4.99285	1.22164	4.10979	2.62775
chrIII:10982067-10983154:-	col-92	W05B2.6	WBGene00000667	0.00188224	0.669833	2.70954e-08	0.167849	0.0102478	0.920621	0.106859	0.365981	0.68369	0.141559	0.688859	0.347914	0.5646	0.038882	0.243517	-0.180634	508.266	329.937	651.024	366.885	443.2	408.77	473.294	349.305	443.385	327.03
chrIII:10984456-10985509:-	col-93	W05B2.5	WBGene00000668	0.487112	0.26728	1.00209e-06	0.0411059	0.000405661	0.587335	0.000537693	0.583508	-0.205696	0.305883	0.556347	0.484147	0.755631	0.120852	0.412589	0.116425	498.339	729.723	1145.37	794.363	1000.98	840.188	1034.02	837.573	859.898	636.886
chrIII:10986727-10987744:-	col-94	W05B2.1	WBGene00000669	0.00302377	0.481873	6.32728e-08	0.0846521	0.00176639	0.93599	0.0344221	0.681504	0.640157	0.205598	0.677075	0.405371	0.652383	0.0330431	0.306135	-0.106158	521.549	368.638	691.829	407.395	502.997	436.144	530.415	394.761	475.065	348.043
chrIII:11703879-11704985:+	col-95	Y41C4A.16	WBGene00000670	1.90405e-39	0.30783	0.982427	1.59254e-28	2.13025e-33	1.81896e-10	5.04032e-13	4.18401e-23	1.45864	0.169356	-0.0106823	1.24795	1.33095	1.27869	1.4156	1.88572	99.7705	39.1206	30.7159	80.2691	87.044	82.3227	91.3786	130.338	34.5118	38.256
chrIII:11705613-11706544:-	col-96	Y41C4A.19	WBGene00000671	0.544421	0.305159	0.000972378	0.189335	0.447819	0.391541	0.792845	0.00111721	-0.126405	-0.197994	0.488095	0.22891	0.140251	-0.201941	0.0654903	-0.505535	31.3244	29.3301	51.943	37.9223	36.3321	31.527	38.3142	25.3136	40.7477	37.3899
chrIII:12992301-12993603:-	col-97	ZK1010.7	WBGene00000672	0.188344	0.318294	5.3001e-26	0.00269961	1.66e-14	7.13024e-05	0.000214188	0.689983	0.513599	0.423215	2.84981	0.988095	2.18886	1.24274	1.13706	-0.247413	1.6169	1.45093	30.6792	2.3729	6.64719	8.05411	7.33772	1.9727	2.81609	0.994505
chrIII:13018834-13020130:+	col-98	F14F7.1	WBGene00000673	0.884056	0.133591	4.03218e-06	0.533933	2.83873e-05	0.801588	0.0540267	0.107141	0.0267784	0.18818	-0.571998	0.0888886	0.424922	-0.0783493	0.273834	0.256078	553.523	611.723	371.979	541.014	701.984	529.483	681.054	672.45	624.6	591.707
chrIV:138461-147919:-	col-99	F29C4.8	WBGene00000674	0.258951	0.125653	0.773743	0.0770524	0.000643816	0.690224	0.371109	0.77926	0.494887	0.64265	0.17938	0.701077	1.19702	0.310323	0.434563	0.2259	0.353662	0.44015	0.41645	0.451655	0.863084	0.4871	0.575856	0.440798	0.353899	0.125471
chrIV:325436-326671:-	col-101	K02D7.3	WBGene00000675	1.81291e-05	0.0242594	0.000716628	0.181663	0.0146546	0.0496066	1.88031e-07	2.98906e-11	0.400171	0.234087	-0.402317	0.150263	0.23939	0.277618	0.577849	0.717475	1133.47	993.769	600.149	888.406	967.79	973.301	1204.91	1330.58	891.17	930.939
chrIV:604444-605876:+	col-102	C18H7.3	WBGene00000676	NA	NA	0.893061	NA	NA	NA	NA	NA	0.0870882	0.0530678	-0.0699211	-0.155149	-0.0165636	-0.0769043	0.105213	-0.112486	0.111861	0.0943488	0.1031	0	0.0593993	0.103203	0.204589	0.0806284	0.157031	0.0757341
chrIV:762412-763678:-	col-103	F56B3.1	WBGene00000677	0.104055	0.0595826	0.0198107	0.0309629	2.33334e-06	0.492653	6.76666e-06	9.45841e-07	0.455671	0.520741	-0.336727	0.567777	1.09556	0.158124	0.57971	0.626749	372.304	386.478	272.844	380.619	592.38	389.001	526.286	544.304	387.428	281.222
chrIV:1353678-1355304:-	col-104	F58F6.1	WBGene00000678	0.840115	0.556203	6.1149e-09	0.635311	4.2327e-10	0.0190707	0.0592854	0.685722	0.0917434	0.232474	1.9766	-0.185907	1.5137	0.97922	0.762745	-0.287188	5.53051	6.15049	77.9217	4.06998	16.6043	28.2907	22.3095	5.87273	9.82754	5.55766
chrIV:1357815-1359224:-	col-105	F58F6.2	WBGene00000679	NA	NA	NA	NA	NA	NA	NA	NA	-0.0727788	-0.0723727	-0.0421555	-0.0366187	-0.0747995	0.110949	0.108213	-0.0423166	0	0	0	0.0320624	0	0.144053	0.145203	0	0.0405193	0.07825
chrIV:1459862-1460785:-	col-106	Y77E11A.15	WBGene00000680	0.640247	0.229058	0.771305	0.21777	0.386186	0.0285788	0.74646	0.934311	0.0706991	-0.155005	0.0425992	-0.153307	-0.111143	-0.225532	-0.0459141	0.0187476	1466.69	1231.98	1452.9	1170.43	1233.17	1203.3	1365.26	1428.74	1572.74	1519.67
chrIV:1548723-1549717:+	col-107	C34H4.4	WBGene00000681	0.168119	0.185384	1.82857e-08	0.0620225	4.31029e-18	0.0401266	0.0677361	0.701055	0.58298	0.576733	1.87565	0.735115	2.75345	0.872025	0.728368	-0.272681	0.856613	0.832437	18.7379	0.987358	7.24115	7.09469	6.11269	1.86705	2.95674	0.294629
chrIV:1768620-1769666:+	col-108	Y41D4A.2	WBGene00000682	NA	NA	0.78708	0.950071	0.585612	NA	0.984081	NA	0.0669071	0.0924938	0.156905	0.0361518	0.239005	0.0895631	-0.0132397	0.067493	0.338083	0.356515	0.524647	0.289748	0.46919	0.454648	0.345637	0.428805	0.399177	0.30484
chrIV:1817044-1820252:-	col-109	Y38C1BA.3	WBGene00000683	0.329834	0.808382	1.55418e-08	0.877773	1.05702e-09	0.0128743	0.00734858	0.912899	0.390736	0.129616	1.96758	0.081625	1.73469	1.04411	1.03697	-0.101897	2.53576	1.94622	30.3634	1.75767	7.71315	11.2558	11.1623	2.28634	3.0201	1.87965
chrIV:4608202-4609671:-	col-110	F19C7.7	WBGene00000684	0.598729	0.84986	1.68184e-05	0.734672	0.390464	0.0980177	0.160401	0.907416	-0.252774	-0.111557	1.57023	-0.170273	0.365203	0.787886	0.619739	-0.108414	0.272982	0.386224	3.85602	0.318041	0.853399	1.62563	1.29411	0.360383	0.495192	0.542464
chrIV:4655784-4657579:-	col-111	F29B9.9	WBGene00000685	0.00022603	0.401617	4.58014e-16	0.256858	0.316863	0.0696947	0.00983836	0.0172409	1.04254	0.326249	1.95697	0.398002	0.343119	0.615975	0.74765	-0.775522	7.04025	3.80812	15.4767	3.85248	3.75258	5.38146	5.99524	1.53931	3.54914	3.13665
chrIV:7150653-7152478:-	col-113	C34D4.15	WBGene00000687	0.976106	0.769196	1.69655e-08	0.931527	0.00944497	0.277779	0.0817852	0.694566	0.0190846	0.159759	1.85479	-0.0512027	0.855241	0.562086	0.693957	-0.275366	1.75336	1.99628	11.3035	1.52892	3.66098	3.30305	3.77193	1.2436	1.94649	1.86963
chrIV:7245494-7246629:-	col-114	D2024.8	WBGene00000688	0.196355	0.174585	0.692017	0.135516	0.241362	0.761922	0.580045	NA	-0.547172	-0.579255	0.227187	-0.605395	-0.485815	-0.253435	-0.289414	-0.556145	0.512311	0.472769	1.30139	0.422747	0.551402	0.597091	0.554012	0.288585	1.03894	1.29054
chrIV:7988676-7991411:+	col-115	Y42H9B.1	WBGene00000689	0.234454	0.792153	1.36661e-05	0.411731	0.16781	0.230923	0.271741	0.879486	-0.492416	-0.149328	1.57561	-0.36023	0.542365	0.630947	0.506153	-0.13593	0.119739	0.326782	3.90856	0.178426	0.909625	1.21401	1.0009	0.242964	0.393487	0.482893
chrIV:8356753-8357907:+	col-116	F17E9.1	WBGene00000690	0.322987	0.170664	0.774118	0.175468	0.568696	0.895309	0.529585	NA	0.447136	0.591796	-0.170251	0.56855	0.273617	-0.131418	-0.312088	0.159599	1.2764	1.50057	0.420198	1.38958	0.986595	0.456094	0.274125	0.80523	0.674751	0.748191
chrIV:8822952-8824161:-	col-117	T28C6.4	WBGene00000691	0.999557	0.977925	0.000727161	0.554119	0.000335735	0.750051	0.613621	0.00742373	0.000341513	0.0146228	1.10205	0.215814	0.934427	0.23159	0.238776	-0.931485	26.6082	26.5051	128.252	29.7762	54.9179	58.7428	59.1308	19.245	52.8794	28.9678
chrIV:8848169-8849663:+	col-118	T11B7.3	WBGene00000692	6.2227e-06	0.000210418	0.123039	0.000108094	0.00116529	0.00174938	0.00460918	6.57487e-08	-0.590569	-0.501301	0.285733	-0.51263	-0.420572	-0.54156	-0.477616	-0.838847	29.5538	31.1005	55.2479	29.2286	31.9453	30.253	31.689	24.3212	50.052	49.2083
chrIV:8978808-8979797:-	col-119	C53B4.5	WBGene00000693	0.00389028	0.897446	0.772532	0.176404	0.00126955	0.904414	0.0435941	0.00234925	0.279432	0.0219015	-0.0464656	0.148871	0.299004	0.033213	0.213611	0.30697	2943.26	2419.51	2424.66	2509.75	2854.36	2564.8	2912.68	3110.82	2794.55	2632.79
chrIV:9260593-9261750:-	col-120	Y11D7A.11	WBGene00000694	0.167838	0.645068	4.69017e-05	0.38324	1.02285e-05	0.533254	0.889927	0.515191	-0.520183	-0.221917	1.49954	-0.352363	1.28169	0.414596	0.0966446	-0.409418	1.79754	2.40121	36.0739	2.00858	8.69016	9.50191	5.80887	2.0263	5.47394	3.27642
chrIV:9394917-9396201:-	col-121	F56D5.1	WBGene00000695	NA	NA	0.884257	NA	0.911557	NA	NA	NA	0.0306502	-0.0338784	0.0756821	0.328926	-0.0504615	0.00967923	0.173574	-0.0724341	0.16337	0.113865	0.198217	0.393188	0.106247	0.149139	0.276358	0.0945909	0.158728	0.152469
chrIV:9563343-9564454:+	col-122	T05A1.2	WBGene00000696	0.051402	0.778099	0.0343026	0.932442	0.00808245	0.911915	0.158106	0.113604	0.201069	-0.0433238	0.219815	-0.0141563	0.251071	-0.0305564	0.15763	0.186933	2359.18	1957.57	2366.91	1895.22	2336.73	1984.14	2265.46	2312.7	2261.22	2230.11
chrIV:9821875-9823135:+	col-123	W08D2.6	WBGene00000697	0.919803	0.854122	0.849131	0.847555	0.953901	0.820837	0.977209	0.880537	0.0627522	0.114635	0.126759	-0.111107	-0.0367215	0.210326	-0.0225901	0.1362	1.06132	1.11801	1.08024	0.797968	0.897723	1.20412	0.887178	1.0909	1.01806	1.06723
chrIV:10216428-10217621:+	col-124	C24F3.6	WBGene00000698	0.178311	0.923064	0.469669	0.869737	0.00850813	0.533154	0.0753393	0.86345	0.160852	0.0180555	0.0733778	0.0272859	0.26873	-0.0816705	0.146869	-0.0298334	3068.34	2733.68	3237.63	2610.22	3168.18	2904.63	3408.53	3011.98	3430.42	2983.53
chrIV:11225483-11226497:+	col-125	C29F4.1	WBGene00000699	0.0289268	0.313637	0.000530039	0.102831	4.61866e-08	0.589046	0.249343	0.765394	0.3963	0.21912	1.01818	0.310216	0.847832	0.294745	0.412215	-0.183201	51.4946	44.6148	125.454	45.2094	68.4828	68.1467	75.3176	45.1632	59.0127	41.8776
chrIV:11263379-11264309:+	col-126	F54D1.2	WBGene00000700	0.208588	0.801566	0.000111733	0.918672	0.134102	0.669776	0.794909	0.0180054	-0.543756	-0.150521	1.38997	0.0635949	0.596709	0.316262	0.160577	-0.967543	0.524349	1.02785	10.3901	1.31555	2.46728	3.5075	2.93806	0.513371	2.70678	1.39967
chrIV:11264925-11265855:-	col-127	F54D1.3	WBGene00000701	0.617541	0.778359	2.60012e-05	0.551315	0.196534	0.914353	0.907372	0.00464936	-0.25677	-0.165756	1.4741	0.290084	0.529595	0.112933	0.0800604	-1.10136	0.664647	0.774765	11.891	1.47741	2.00316	3.08661	2.96985	0.503996	3.02282	1.13208
chrIV:11549979-11551938:-	col-128	F12F6.9	WBGene00000702	NA	NA	0.405926	NA	0.35892	NA	0.298856	NA	0.118321	0.134956	0.382839	-0.0944993	0.314877	0.335336	0.448624	0.12751	0.160113	0.16831	0.381764	0.0438154	0.260477	0.352172	0.440956	0.202974	0.133153	0.103498
chrIV:12108649-12110236:-	col-129	M18.1	WBGene00000703	2.74858e-22	6.85145e-11	0.203238	5.68219e-07	0.000183039	0.00312754	0.0178801	1.44172e-11	-0.961948	-0.670187	0.388737	-0.524854	-0.39737	-0.807871	-0.638367	-1.57186	664.51	805.927	2260.36	847.387	949.331	873.429	1000.29	471.823	1854.19	1433.08
chrIV:12427482-12428493:-	col-130	F08G5.4	WBGene00000704	0.913646	0.309828	2.97581e-06	0.950051	2.33624e-07	0.248912	0.278787	0.934311	-0.0651662	0.442992	1.68509	-0.0391303	1.61124	0.620256	0.504834	-0.079721	1.38533	2.37992	28.1423	1.33971	6.6867	7.60831	6.42021	2.21559	2.92548	1.62473
chrIV:13065705-13067264:-	col-131	C39E9.3	WBGene00000705	NA	NA	0.0307664	NA	NA	NA	0.269003	NA	0	0.046581	0.717767	0.129786	0.246124	0.415804	0.412179	-0.0199045	0	0.0331921	0.746175	0.0905319	0.174531	0.391363	0.394488	0.0299942	0.0366943	0
chrIV:13089554-13091043:-	col-132	C39E9.9	WBGene00000706	NA	NA	0.810111	0.940305	0.43639	NA	0.914446	NA	-0.0841206	-0.0570288	0.128966	-0.0408481	-0.299344	0.0269737	0.0639794	0.0217601	0.310693	0.331149	0.381048	0.327132	0.138996	0.28071	0.315789	0.27423	0.283697	0.426934
chrIV:14098310-14099327:-	col-133	F52B11.4	WBGene00000707	0.00670367	5.55683e-08	0.00380283	0.00262958	0.181652	0.775993	0.661152	0.000513008	0.503929	-0.953169	1.06748	-0.556414	-0.271462	-0.236225	-0.23479	-1.25434	76.7493	25.5808	219.055	32.7214	41.3206	58.4734	58.5476	17.0086	84.0463	57.575
chrIV:15129630-15131754:-	col-135	M199.5	WBGene00000708	0.997927	0.389196	0.342323	0.437427	0.000144637	0.0833047	6.68849e-11	7.04264e-06	-0.00216328	0.411166	-0.385657	0.362987	1.32206	0.658601	1.79591	1.3081	1.21974	2.20405	0.94145	1.95381	6.27918	2.43171	6.24129	4.19338	1.50803	1.33227
chrIV:16601452-16602743:-	col-137	Y51H4A.9	WBGene00000710	0.623682	0.996688	8.87407e-07	0.692064	0.00554116	0.415408	0.39282	0.538435	-0.253912	-0.00256184	1.71663	-0.207869	0.995356	0.484678	0.413363	-0.390319	0.521142	0.749692	7.20091	0.522625	2.17899	2.05095	1.874	0.593134	1.21644	0.830658
chrIV:17182764-17183704:-	col-138	C52D10.13	WBGene00000711	0.912227	0.781933	6.76644e-07	0.504629	9.47286e-05	0.0388676	0.0499046	0.879029	0.0696917	0.164038	1.77419	0.320099	1.3543	0.919724	0.809364	-0.137864	4.92906	5.61814	97.8581	6.62209	23.2159	36.9105	32.1252	7.34731	10.6689	4.80449
chrV:4652368-4653972:-	col-139	F41F3.4	WBGene00000712	4.19271e-25	2.92536e-12	0.288946	2.4806e-10	2.15959e-07	0.000541918	0.00925267	3.60997e-13	-1.01079	-0.704363	0.334226	-0.642379	-0.526837	-0.905399	-0.684096	-1.66728	618.254	757.649	1875.1	750.834	834.003	701.65	837.215	380.156	1606.97	1379.79
chrV:5835836-5836824:-	col-140	F26F12.1	WBGene00000713	0.713183	0.173737	0.915587	0.150794	0.685805	0.565857	0.6522	0.824946	0.0536308	-0.15969	0.0203613	-0.161546	-0.0564553	-0.104047	0.0668185	0.0496666	3904.16	3311.02	3608.67	3135.64	3455.47	3305.43	3728.94	3684.07	3967.68	4094.84
chrV:6829687-6830982:+	col-141	T15B7.5	WBGene00000714	0.607769	0.781014	0.368998	0.594372	0.666247	0.886869	0.906312	0.0110786	-0.24226	0.150141	0.401128	0.241184	0.197423	-0.132842	0.0771723	-0.968368	1.76288	2.58143	4.34904	2.671	2.6089	2.60219	3.21105	1.01603	3.31521	2.45803
chrV:6831146-6832237:+	col-142	T15B7.4	WBGene00000715	2.54874e-05	4.25435e-23	0.00169111	6.47036e-05	0.707133	0.253874	0.0118109	3.52998e-11	-0.434923	-0.953493	0.502621	-0.413942	-0.0572454	-0.256995	-0.41541	-0.957022	236.212	161.265	586.817	224.241	295.318	338.144	301.37	203.281	454.532	350.214
chrV:6835618-6836683:+	col-143	T15B7.3	WBGene00000716	0.000435462	0.0112746	9.8213e-06	3.17307e-05	7.31913e-15	4.55651e-15	6.39731e-35	1.02133e-35	0.727004	0.556577	0.494356	0.838115	1.46111	0.820553	1.2393	1.25566	536.4	464.494	569.225	545.552	895.886	717.533	966.126	977.426	446.777	335.398
chrV:9159619-9160619:-	col-144	B0222.6	WBGene00000717	0.0602679	0.123019	0.000550167	0.625338	0.000136305	0.44839	0.755069	0.0118425	-0.412404	-0.35858	1.15342	-0.134205	0.696459	0.416508	0.168389	-0.91523	12.6576	13.0161	65.454	14.6149	27.7413	33.501	26.5518	8.97496	25.2167	18.8277
chrV:9162028-9162982:-	col-145	B0222.7	WBGene00000718	0.539478	0.853754	0.000639186	0.942996	4.24755e-06	0.569886	0.69877	0.290253	-0.247918	-0.0933181	1.29079	0.0370122	1.20371	0.391285	0.225342	-0.56745	3.22662	3.65606	32.1761	3.90029	10.3661	11.4298	9.2069	2.53711	7.49316	4.38342
chrV:9629919-9630987:+	col-146	T06E4.6	WBGene00000719	0.0035788	0.0436087	0.0124487	0.455992	0.327852	0.288625	0.338199	3.50924e-05	-0.915766	-0.684233	0.912751	-0.297477	-0.3584	-0.538135	-0.419397	-1.39957	16.9191	20.7308	138.619	27.8873	26.9869	34.6217	39.0296	13.6411	65.807	42.3567
chrV:9632247-9633313:-	col-147	T06E4.4	WBGene00000720	7.13443e-06	0.00380687	0.049281	0.171133	0.023912	0.151452	0.156679	2.74073e-07	-1.11384	-0.767881	0.789866	-0.407925	-0.596283	-0.692121	-0.604259	-1.77291	34.9373	45.7707	287.236	58.2064	51.0944	60.6703	67.1386	13.9347	144.901	94.2318
chrV:10241759-10242693:+	col-148	C12D8.8	WBGene00000721	NA	NA	NA	NA	NA	NA	NA	NA	0	0	0.110945	0	0.054968	0.0704688	0.041706	0.0363959	0	0	0.0927808	0	0.0238689	0.058559	0.0345931	0.0302254	0	0
chrV:10291671-10292843:-	col-149	B0024.1	WBGene00000722	2.56647e-21	1.54503e-09	0.267369	5.46606e-08	1.19933e-06	0.0392064	0.0902251	8.92973e-24	-1.43138	-0.945095	0.392286	-0.85181	-0.750486	-0.698265	-0.545984	-2.5635	31.8787	45.0251	158.04	45.7569	50.4018	63.8463	72.5724	12.3372	127.61	99.4017
chrV:10293540-10294596:-	col-150	B0024.2	WBGene00000723	0.0628371	0.163815	0.00405945	0.0297681	0.509367	0.843186	0.803018	1.90877e-07	-0.479825	-0.388042	0.703171	-0.542285	0.193272	-0.118954	-0.101483	-1.21853	8.66687	9.18855	26.2766	7.74048	14.0022	13.9177	14.0856	5.7091	17.0061	13.7609
chrV:10393508-10395209:-	col-151	AC3.6	WBGene00000724	NA	NA	NA	NA	NA	NA	NA	NA	-0.181175	0.0516685	-0.050647	-0.327771	-0.127528	-0.0314147	0.108515	0.116916	0.0940568	0.26567	0.0609909	0	0.126181	0.0747292	0.191991	0.19666	0.109184	0.246846
chrV:10560898-10562166:+	col-152	F32G8.5	WBGene00000725	NA	NA	9.86999e-05	0.332043	0.986221	0.89948	0.90925	NA	-0.210711	-0.436372	1.36563	-0.364319	0.00947117	0.124292	-0.0758186	-0.298037	0.301278	0.105237	3.76182	0.151463	0.487559	0.562774	0.303415	0.0893882	0.438912	0.563088
chrV:10949879-10951733:+	col-153	F17C11.3	WBGene00000726	0.215399	0.0208057	0.545521	0.111858	0.109626	0.0834307	0.119926	0.171308	-0.322408	-0.547246	-0.206882	-0.390946	-0.371107	-0.520812	-0.432987	-0.428944	7.70042	6.37921	8.88717	6.80916	7.09241	6.95541	7.44039	7.4811	11.6626	10.7346
chrV:11385342-11386363:+	col-154	F55C10.2	WBGene00000727	0.324812	0.661655	2.15405e-06	0.679372	0.000155127	0.486033	0.387029	0.100128	-0.257247	-0.138261	1.25204	0.122022	0.722405	0.330114	0.313961	-0.565286	10.2045	11.0338	45.2538	12.7357	20.4254	21.3576	21.0622	10.0266	18.0755	13.5333
chrV:11388872-11389857:-	col-155	F55C10.3	WBGene00000728	0.55416	0.809196	7.04378e-05	0.441265	0.000664835	0.805681	0.712582	0.0746271	-0.137425	-0.0668271	0.939191	0.16462	0.53311	0.144128	0.140039	-0.518434	20.0967	20.8958	58.7562	23.4393	31.3612	31.6433	31.5282	18.7243	31.4891	24.2132
chrV:11449205-11450339:-	col-156	F57B7.3	WBGene00000729	0.504641	0.522463	3.46516e-07	0.415321	0.000193956	0.227706	0.433164	0.341856	-0.327212	-0.325078	1.78009	-0.376186	1.29769	0.628189	0.386261	-0.524385	0.50384	0.493838	12.4935	0.425944	3.58242	3.78562	2.82933	0.681319	1.87228	0.947217
chrV:11484036-11484980:+	col-157	T11F9.9	WBGene00000730	0.000576706	0.0456095	0.00675814	0.167677	0.30605	0.454411	0.767559	3.21099e-09	-0.656813	-0.419828	0.69527	-0.301138	0.219686	-0.307916	-0.120015	-1.39782	10.9295	12.9035	40.6388	13.3751	20.1062	18.5093	21.4773	7.61302	26.3342	19.4936
chrV:11829563-11831203:+	col-158	D2023.7	WBGene00000731	0.420526	0.0179709	0.812489	0.496321	7.2903e-06	0.254487	0.322997	2.3639e-10	0.311084	0.743088	-0.145658	-0.273929	1.21548	0.578862	0.443726	2.04704	2.92083	4.17807	1.30794	1.5859	5.91796	2.94583	2.5479	11.543	1.72496	2.40409
chrV:13198216-13199301:-	col-159	F57B1.3	WBGene00000732	0.391579	0.679407	3.30721e-11	0.501154	7.67345e-07	0.829011	0.613355	7.98038e-05	-0.140815	-0.0809337	0.849849	0.113891	0.590143	-0.075861	0.103553	-0.547009	313.732	322.902	780.468	351.8	505.953	401.226	456.512	285.903	472.632	378.025
chrV:13200968-13202175:-	col-160	F57B1.4	WBGene00000733	0.504715	0.667047	3.31752e-14	0.127954	0.000227611	0.106491	0.000369099	0.836815	0.179195	0.129841	0.814784	0.342405	0.704396	0.244799	0.421083	0.0561865	563.058	534.875	985.933	594.983	799.079	657.242	745.137	574.771	615.925	535.741
chrV:13317019-13317997:-	col-161	C50B6.4	WBGene00000734	0.120854	0.902785	2.71964e-05	0.6565	9.88451e-10	0.527558	0.613621	0.544415	-0.536352	-0.0641943	1.53925	-0.189215	1.61728	0.419974	0.277646	-0.39141	3.11864	4.78378	79.0196	4.0675	18.9678	19.8833	16.0894	4.38721	11.3297	5.59108
chrV:13441953-13443388:+	col-162	Y2H9A.3	WBGene00000735	0.212344	0.37067	3.82211e-05	0.627762	2.36637e-10	0.523943	0.566419	0.707358	-0.442212	-0.347923	1.51433	-0.199247	1.61842	0.422637	0.306816	-0.278972	2.86421	3.08206	66.3681	3.3698	15.3637	16.7264	14.0004	4.47397	9.18226	4.66195
chrV:20600064-20602443:+	col-163	F46B3.17	WBGene00000736	NA	NA	NA	NA	NA	NA	NA	NA	0.276505	0.0961892	0.341451	-0.049954	0.0239471	0.211815	0.126896	0.214616	0.125255	0.0592588	0.122948	0.0125913	0.036362	0.0739931	0.0426215	0.0733762	0	0.0317518
chrX:2093469-2094838:+	col-164	T21D9.1	WBGene00000737	NA	NA	NA	NA	NA	NA	NA	NA	0.126908	0.0456393	0.0367819	0.0461187	0.0627322	0.170096	0.0457273	0.079474	0.0731651	0.0252344	0.0206192	0.0246781	0.0334316	0.0924862	0.0252481	0.0439705	0	0
chrX:4353593-4354786:+	col-165	F14H12.1	WBGene00000738	NA	NA	NA	NA	NA	NA	NA	NA	-0.000427838	-0.0393941	-0.0552113	-0.0396709	-0.0127331	-0.0151637	-0.0547847	-0.0294558	0.0294624	0	0	0	0.0189144	0.0414032	0	0.0275113	0.0673137	0.0324987
chrX:6279639-6280983:+	col-166	T07H6.3	WBGene00000739	0.0241394	0.154745	5.6422e-07	0.839764	0.353608	0.685174	0.36359	0.000122751	-0.400733	-0.281952	0.944931	-0.0530733	0.182369	0.166887	0.235065	-0.776698	22.5122	24.2492	63.1725	27.1849	32.9973	35.2878	37.1588	17.2869	34.7226	32.9094
chrX:6323261-6324481:+	col-167	T10E10.2	WBGene00000740	0.000268356	0.215122	5.52741e-08	0.162032	0.41393	0.667231	0.465414	6.29596e-13	-0.776566	-0.323119	1.25692	-0.344221	0.211312	0.215307	0.244354	-1.67326	11.6286	16.3172	70.7767	15.1951	23.7163	31.3377	32.0736	6.69001	29.4794	23.0312
chrX:6326155-6327339:+	col-168	T10E10.1	WBGene00000741	0.000336588	0.108511	1.1607e-06	0.15893	0.213461	0.887566	0.593693	2.67954e-11	-0.716796	-0.370198	1.13894	-0.322868	0.273612	0.095074	0.190926	-1.56157	10.4535	13.4509	57.3817	13.2308	21.1019	25.3508	27.3553	6.52857	26.2302	19.6136
chrX:6329124-6330091:+	col-169	T10E10.5	WBGene00000742	0.320446	0.895224	4.28606e-06	0.99966	0.105543	0.475802	0.392886	9.62856e-05	-0.276818	-0.0524151	1.17823	-0.000298069	0.378529	0.323568	0.300463	-1.05943	10.3223	12.1305	42.3206	11.9677	16.3391	21.3142	20.9205	6.66218	18.239	13.9326
chrX:6331584-6332650:+	col-170	T10E10.6	WBGene00000743	0.0103807	0.218821	2.32732e-07	0.202955	0.0545518	0.561018	0.77797	2.72721e-06	-0.615179	-0.343803	1.25322	-0.341635	0.445686	0.273895	0.121408	-1.2004	7.35893	9.00683	40.0183	8.55066	16.012	18.4539	16.3187	5.40599	16.4981	12.9888
chrX:6334262-6335185:+	col-171	T10E10.7	WBGene00000744	0.812512	0.978454	0.416244	0.908061	0.411597	0.791088	0.887749	NA	-0.136938	0.0191301	0.404447	0.0715135	0.367263	-0.234687	-0.0971127	0.00768511	0.602753	0.773992	1.40857	0.789474	1.20166	0.506497	0.651295	0.784426	0.861804	0.829223
chrX:6672792-6674374:+	col-172	F38B6.5	WBGene00000745	NA	NA	0.0456053	NA	NA	NA	0.366365	NA	0.2736	0.197988	0.761575	0.145834	0.351883	0.305978	0.399584	-0.0849472	0.1413	0.0983535	0.75358	0.0664176	0.171425	0.333151	0.406301	0.0848624	0.138357	0
chrX:6875127-6877494:-	col-173	F41C6.5	WBGene00000746	0.835708	0.509621	7.99271e-06	0.996518	0.0620786	0.170207	0.291266	0.803067	0.120981	0.327834	1.60003	0.0048536	0.706836	0.688147	0.491502	-0.20726	0.580297	0.816256	4.76278	0.432674	1.31779	1.84034	1.45761	0.516678	0.810868	0.492441
chrX:7546796-7548320:+	col-174	F46C8.2	WBGene00000747	NA	NA	0.00028038	0.934041	0.449024	0.259997	0.177076	0.828671	0.231782	0.311485	1.32065	0.0424378	0.2809	0.589584	0.578476	-0.177532	0.262398	0.324811	2.10684	0.120725	0.282193	0.739854	0.733078	0.0430205	0.167573	0.107173
chrX:9233583-9234557:-	col-175	C35B8.1	WBGene00000748	0.949842	0.932284	1.25539e-06	0.91025	0.000817731	0.0518014	0.108647	0.752348	-0.0390505	0.0582583	1.73946	-0.0699732	1.18316	0.881323	0.687915	-0.245714	3.23699	3.71143	74.5921	2.88772	14.2469	27.0058	20.8082	3.68878	7.38844	3.73459
chrX:10077554-10078679:+	col-176	ZC373.7	WBGene00000749	0.629439	0.299192	0.00650555	0.790916	0.414889	0.0619191	0.00305937	0.90456	-0.243964	0.459938	0.999067	0.142428	0.350131	0.800081	1.06234	0.105853	0.948483	2.06388	3.90792	1.39725	1.77201	3.23207	4.16595	1.5833	1.54129	1.39031
chrX:10999676-11001786:-	col-177	F59F3.2	WBGene00000750	0.208383	0.442258	0.796748	0.296672	0.598875	0.529988	0.646661	0.343943	-0.539347	-0.373547	0.16409	-0.457102	-0.256167	-0.41827	-0.256755	-0.528293	0.333129	0.443596	1.13511	0.365292	0.514595	0.501686	0.648815	0.418027	1.03818	0.845906
chrX:11199390-11200399:+	col-178	C34F6.2	WBGene00000751	0.0075784	0.595163	0.282009	0.162081	2.18689e-09	0.582165	0.000130818	0.00507349	0.248171	0.0699456	0.1142	0.144937	0.493253	0.0867429	0.319684	0.253009	1764.43	1534.39	1817.99	1533.85	2004.89	1783.23	2100.23	2004.16	1871.51	1613.97
chrX:11201458-11202423:+	col-179	C34F6.3	WBGene00000752	0.0353982	0.943906	0.407863	0.876394	0.0110738	0.574079	0.114629	0.349885	0.204464	0.0117966	0.0915206	0.0231068	0.231189	0.086013	0.149836	0.115598	1083.94	933.206	1077.55	891.95	1056.2	1073.38	1122.58	1095.94	1127.12	1022.45
chrX:11711244-11712213:-	col-180	C44C10.1	WBGene00000753	0.844671	0.620237	4.06742e-08	0.792745	1.27616e-05	0.613761	0.580676	1.54176e-06	-0.0741269	-0.169367	1.23151	0.0918978	0.918433	0.232606	0.192109	-1.14295	12.6626	11.5953	50.5265	13.4947	26.0023	23.2675	22.525	7.66608	21.5843	14.6104
chrX:12104862-12106013:+	col-181	W03G11.1	WBGene00000754	0.769856	0.316923	0.555913	0.149988	0.510911	0.0996939	0.957629	0.625877	0.0449209	-0.127638	0.0808725	-0.164866	-0.0850842	-0.199629	-0.00998778	0.0861085	2490.71	2173.24	2531.65	2008.04	2173.04	2077.59	2374.66	2541.02	2667.38	2628.3
chrX:12636085-12636988:-	col-182	R09A8.4	WBGene00000755	NA	NA	0.000133383	0.721302	0.197707	0.195016	0.320026	0.787473	-0.130761	0.049575	1.36302	-0.165667	0.477189	0.638518	0.448732	0.208158	0.2258	0.393814	3.53103	0.182307	0.849476	1.22392	0.842648	0.457284	0.176135	0.378118
chrX:13466569-13467668:-	col-183	F02D10.1	WBGene00000756	NA	NA	0.250768	NA	NA	NA	NA	NA	0.0355702	-0.131945	0.409518	0.0392226	-0.012632	0.037463	0.0765348	-0.0733044	0.176485	0.0620763	0.46052	0.166076	0.136159	0.156505	0.179067	0.0785868	0.137757	0.164655
chrX:13469320-13470403:+	col-184	F15A2.1	WBGene00000757	0.919816	0.0628869	0.248614	0.000848235	0.258504	0.339312	0.973202	0.575451	0.0166926	-0.200684	0.153788	-0.319649	-0.12619	-0.158694	-0.00757254	0.10718	1242.37	1050.91	1218.73	916.237	1074.2	976.804	1087.13	1179.14	1219.09	1337.46
chrX:13510040-13511027:-	col-185	H06A10.2	WBGene00000758	NA	NA	0.974701	0.630323	0.956279	NA	0.987565	NA	-0.157576	0.0836657	-0.0210391	-0.224739	0.0328569	-0.0660602	-0.00871552	0.137576	0.327068	0.551731	0.284735	0.254155	0.47622	0.251844	0.299099	0.44751	0.341749	0.515088
chrX:15952304-15954493:+	col-186	E03G2.4	WBGene00000759	0.372663	0.536016	0.0178005	0.236719	0.356096	0.338662	0.167334	0.0210006	-0.400628	-0.30915	0.864406	-0.498363	-0.391038	-0.507235	-0.568672	-0.900979	1.32745	1.45626	5.58609	1.11615	1.28791	1.54493	1.43279	0.983703	2.85832	2.24709
chrX:16072831-16074780:+	col-187	C30F2.1	WBGene00000760	NA	NA	NA	NA	NA	NA	NA	NA	-0.228644	-0.273069	0.0778155	-0.176401	-0.157599	0.0104094	-0.0670175	-0.144324	0.066958	0.034629	0.291514	0.0980239	0.111845	0.215926	0.134384	0.0603404	0.229697	0.264905
chrI:5412845-5415632:-	coq-1	C24A11.9	WBGene00000761	0.296967	0.278381	0.160133	0.179767	0.980238	0.00829527	0.00748128	0.0165071	-0.139409	-0.14752	-0.202145	-0.168907	0.00480646	-0.358004	-0.342207	-0.323797	45.1233	44.3206	43.4985	41.2809	47.79	38.9181	39.3797	39.9011	56.0638	54.2533
chrIII:6935912-6939389:+	coq-2	F57B9.4	WBGene00000762	0.529318	0.539157	0.811028	0.748128	0.0235313	0.730931	0.700891	0.88744	-0.110383	-0.11202	-0.0600852	-0.0611523	-0.293975	-0.110696	-0.087903	0.0502864	25.2193	24.8718	22.439	24.4191	21.1468	21.6044	21.9746	24.2842	26.1229	29.7312
chrIV:14793086-14796343:-	coq-3	Y57G11C.11	WBGene00000763	0.757307	0.913178	0.706203	0.549619	0.155864	0.93599	0.0265768	0.596747	-0.0667529	-0.0275698	-0.0890411	-0.114012	-0.22013	-0.0367987	-0.36279	-0.142236	33.589	34.0786	32.8493	30.355	28.756	34.1398	26.9516	31.6212	39.0814	38.3894
chrI:3869222-3870127:+	coq-4	T03F1.2	WBGene00000764	0.764868	0.358213	0.119044	0.907991	0.160503	0.232456	0.00419618	0.414743	-0.0781605	-0.206268	-0.347837	0.033697	-0.262829	-0.325044	-0.578233	-0.245629	22.7715	20.4537	20.8904	23.1019	19.0115	21.2781	17.5842	22.5815	30.2301	26.2636
chrIII:7857242-7858392:-	coq-5	ZK652.9	WBGene00000765	0.456625	0.254741	0.0116229	0.917803	0.533518	0.125502	6.57274e-07	0.0264106	-0.101771	-0.147394	-0.314483	-0.018343	-0.0832592	-0.232465	-0.562291	-0.293012	76.6708	73.3028	68.761	75.9989	74.2871	72.8623	57.6169	69.8095	95.8896	89.7695
chrV:9336738-9338834:+	coq-6	K07B1.2	WBGene00000766	0.21754	0.000595512	0.305808	0.0695507	0.0110511	0.665083	0.112949	0.458675	-0.168154	-0.397832	-0.154643	-0.227664	-0.289167	-0.104214	-0.218415	-0.142797	43.5039	36.4616	42.0404	38.9736	38.178	43.5495	40.1774	42.3927	52.3532	53.4064
chrIII:4863391-4866914:+	coq-8	C35D10.4	WBGene00000767	0.230824	1.18881e-07	0.000101674	0.0427322	0.00348152	0.108034	4.02033e-07	0.251049	-0.126955	-0.447747	-0.385603	-0.192174	-0.253149	-0.205171	-0.485462	-0.159383	70.4936	55.5323	54.5932	62.8988	61.69	62.0181	50.8793	64.0578	79.9579	83.9558
chrIII:10249039-10254619:+	cor-1	R01H10.3	WBGene00000768	0.325619	0.260498	0.64825	0.125386	0.978155	0.871437	0.986103	0.151182	-0.198916	-0.227635	0.115106	-0.281931	0.00782017	-0.0712607	0.00563331	-0.309495	10.5527	10.1971	14.4102	9.30029	11.7317	12.5936	13.3052	10.5675	14.7793	13.2961
chrIII:9322233-9324650:+	cpb-1	C40H1.1	WBGene00000770	0.000526017	9.13443e-05	0.901476	0.0603655	0.00039039	0.00506562	0.0688766	0.122601	0.446848	0.501058	0.039665	0.267613	0.438383	0.507878	0.338911	0.322158	21.7059	22.2792	15.2317	17.8103	20.6241	21.446	18.9647	18.7187	16.4995	17.1563
chrII:6192804-6195175:+	cpb-2	C30B5.3	WBGene00000771	0.00387743	0.962163	0.741527	0.000292858	0.9221	0.951105	0.246929	0.742433	-0.755113	-0.0230548	0.148965	-0.921659	-0.0400566	-0.0571915	0.393001	-0.188622	2.44821	4.38895	8.15003	1.98019	4.17764	6.86654	9.95502	6.16247	8.03278	4.92747
chrI:5788634-5791755:-	cpb-3	B0414.5	WBGene00000772	0.0139083	6.20511e-05	0.0707338	0.00986381	0.141347	0.00704542	0.0383919	0.808013	0.235626	0.360106	-0.217058	0.24401	0.147752	0.315631	0.24017	-0.0578629	73.3351	79.04	53.5343	68.8647	65.914	78.0331	73.9923	59.9198	69.6375	67.661
chrII:8600300-8602421:-	cpf-1	F28C6.3	WBGene00000773	0.183724	0.898789	0.0146812	0.948286	4.07695e-05	0.520836	0.00762404	0.625456	-0.144814	0.0210203	-0.355608	-0.01082	-0.357183	-0.153647	-0.380052	-0.122788	66.1289	73.3588	51.08	67.9025	54.4496	59.034	50.19	60.3622	73.539	79.7778
chrIII:13266839-13268796:-	cpf-2	F56A8.6	WBGene00000774	0.914222	0.533639	0.433593	0.529865	0.807381	0.567308	0.00429617	0.974039	-0.0323746	0.152123	-0.20633	0.144504	-0.063615	-0.203882	-0.585985	-0.0182302	16.3465	18.4781	14.2055	17.37	15.2778	14.2157	10.6773	16.3444	18.4828	18.2395
chrIV:9451321-9453355:+	cpin-1	F38E11.3	WBGene00000775	0.689427	0.0762055	0.423728	0.258617	0.703517	0.542713	0.327783	0.89742	-0.115719	-0.401489	-0.247689	-0.269292	-0.105551	-0.250747	-0.288188	-0.0725933	10.162	8.08736	9.05462	8.45643	9.78788	9.07122	8.78749	10.3983	12.2633	12.0729
chrV:16592550-16595325:-	cpl-1	T03E6.7	WBGene00000776	0.920705	0.30906	0.00183935	0.0137668	0.7618	0.893749	0.113308	0.010814	-0.0151553	0.114406	-0.396718	0.226693	-0.0394439	-0.0459335	0.225032	0.34394	913.007	986.228	705.371	1011.35	858.029	905.938	1099.06	1196.29	1044.13	1005.31
chrI:8636114-8637955:-	cpn-1	F43G9.9	WBGene00000777	0.391055	2.33667e-05	0.0879425	0.24285	0.559768	0.259499	0.00181694	0.699467	0.0898619	0.336387	-0.209978	0.113919	-0.0627063	0.175385	0.341531	0.08205	194.948	228.786	143.568	185.229	167.496	188.567	212.213	176.578	185.842	199.354
chrII:337339-339248:+	cpn-2	D1069.2	WBGene00000778	0.0255772	0.348643	0.899305	0.543681	0.922645	0.774586	0.450567	0.926396	-0.837053	0.419676	-0.0857538	-0.284127	0.0560481	0.236022	0.35951	-0.0846991	0.603345	2.56734	1.94844	1.15782	1.71725	2.68416	3.0373	1.93888	2.36323	1.85982
chrI:3987894-3988705:+	cpn-3	F28H1.2	WBGene00000779	0.211008	0.297795	0.957235	0.0450141	0.632345	0.259997	0.727885	0.740312	-0.161438	-0.14282	0.0133745	-0.23385	0.0705175	-0.193545	-0.0660647	-0.0807735	239.501	239.205	270.356	212.691	269.838	233.299	255.497	252.799	298.628	292.501
chrI:10924231-10925746:-	cpn-4	F49D11.8	WBGene00000780	0.232582	0.0463158	0.000223401	0.00726742	0.00896192	0.581756	0.217498	0.00478754	-0.237445	-0.364741	0.500793	-0.457388	-0.432785	-0.140771	-0.206552	-0.416239	98.834	88.8065	142.872	78.7981	81.8965	90.2381	86.0332	73.9425	111.316	128.11
chrV:11975496-11976740:+	cpr-1	C52E4.1	WBGene00000781	1.70564e-24	2.46181e-05	1.26481e-39	9.19707e-15	5.18043e-46	0.00137211	3.30762e-21	0.0459244	1.33143	0.608974	2.00579	1.03642	1.80771	0.594796	1.46894	0.406661	96.5482	56.4338	238.176	72.8263	130.056	84.5214	160.739	73.5783	60.734	40.0625
chrV:16532968-16534089:-	cpr-2	F36D3.9	WBGene00000782	NA	NA	NA	NA	NA	NA	NA	NA	0.0427931	0	-0.00758327	0.0423476	0.124344	-0.0416542	-0.000385898	0.201153	0.0302984	0	0.0255824	0.0273879	0.0816691	0	0.0313254	0.214158	0.0346119	0
chrV:15296817-15298659:-	cpr-3	T10H4.12	WBGene00000783	0.30562	2.61604e-19	0.5679	0.000249692	0.000287259	0.00942382	0.00416713	0.00201443	0.257216	-1.76855	0.180802	-0.747237	-0.714528	-0.642359	-0.658733	0.697501	22.7418	4.66875	18.6771	9.92928	10.4307	9.87837	9.76326	27.6546	18.1486	20.4142
chrV:6614657-6615828:+	cpr-4	F44C4.3	WBGene00000784	4.84482e-38	0.307108	0.608465	2.47166e-07	3.12798e-38	0.168837	0.399409	0.0929426	-1.09082	-0.122642	-0.118844	-0.462802	-1.08005	-0.291405	0.173822	-0.321675	120.327	235.088	303.309	175.255	116.001	267.557	375.11	261.781	368.799	283.077
chrV:1132598-1133994:-	cpr-5	W07B8.5	WBGene00000785	0.228342	4.69907e-11	0.00949755	0.950206	0.796077	2.05009e-05	1.22155e-12	1.06163e-07	-0.115907	-0.490717	0.264567	-0.00898418	-0.0313263	-0.410614	-0.627898	-0.486312	489.914	371.34	766.677	493.415	497.12	476.317	408.673	451.578	709.679	578.836
chrX:6607166-6609009:+	cpr-6	C25B8.3	WBGene00000786	0.00015392	0.0612346	4.59382e-07	0.383244	3.17663e-05	0.899152	0.704593	0.000295908	-0.312689	-0.176274	-0.6153	0.092136	-0.331507	0.0453471	0.0758393	0.466065	328.545	356.586	249.123	408.035	310.047	399.498	408.316	539.543	431.402	445.858
chrI:4446583-4448462:-	cps-6	C41D11.8	WBGene00000787	0.00815063	0.00182241	0.58965	0.035772	0.000359307	0.830065	0.0557307	0.693006	-0.304095	-0.354301	-0.0973546	-0.249123	-0.377783	-0.0658872	-0.262877	-0.095019	61.3527	58.4326	61.0556	59.6165	55.6924	62.4508	54.2702	61.1693	72.9992	82.9418
chrI:2686641-2689475:-	cpz-1	F32B5.8	WBGene00000788	0.349754	0.0210163	0.0143593	0.56717	0.774797	0.848558	0.989459	1.87145e-06	-0.0998247	-0.208951	-0.288329	-0.0654145	-0.0357621	0.0538027	0.00263881	0.502172	273.594	250.033	253.675	261.917	273.732	323.376	311.834	444.208	347.156	319.719
chrV:13381176-13383063:+	cpz-2	M04G12.2	WBGene00000789	1.68642e-05	1.79031e-06	2.99425e-12	0.0146527	0.000264566	0.0629391	0.00923625	0.00135698	0.439839	-0.49974	0.719022	-0.274306	0.369303	-0.260798	-0.314674	-0.381134	83.8961	42.5528	96.31	47.2959	76.3158	48.0999	46.2529	44.1242	64.5199	66.9193
chrX:17402480-17413776:-	crb-1	F11C7.4	WBGene00000792	0.541892	0.825672	0.142536	0.202955	0.648648	0.756695	0.986723	0.861451	0.171685	0.0764224	0.391515	0.303671	0.126303	-0.163122	-0.00706411	-0.0950657	2.00334	1.83987	2.40256	2.06812	1.85087	1.56349	1.76825	1.65159	1.98418	1.91549
chrIII:11657638-11693737:+	crh-1	Y41C4A.4	WBGene00000793	0.111728	0.309316	0.785141	0.0132814	3.73877e-08	0.647621	0.439496	0.00882746	0.239417	0.172054	-0.0664309	0.339473	0.653454	0.130538	0.149774	0.405207	18.5523	17.4398	16.8625	18.6149	23.8501	19.4439	19.7037	23.674	19.7275	17.0175
chrI:3481989-3484502:+	crn-1	Y47G6A.8	WBGene00000794	0.88049	0.847967	0.0401619	0.0484883	0.00266236	0.5574	0.530747	0.840667	0.026242	0.0337397	-0.298396	0.216825	-0.301755	0.140203	-0.115872	-0.0613221	98.0965	97.2422	68.8516	104.925	74.3962	94.2173	78.4757	81.5897	95.1041	104.893
chrV:5594599-5595732:+	crn-2	CD4.2	WBGene00000795	0.431397	0.264022	0.890672	0.276565	0.0322634	0.907765	0.194273	0.967775	-0.163724	-0.224014	0.0488844	-0.211005	-0.348992	0.063047	-0.300572	-0.02258	20.3893	19.2533	18.1729	18.4047	17.0344	18.3795	13.9987	17.2277	19.5573	25.0282
chrII:10587983-10592594:+	crn-3	C14A4.4	WBGene00000796	0.0145688	0.0828106	0.235399	0.00645872	0.574339	0.915747	0.000877025	0.97292	0.225713	0.174253	-0.161719	0.246076	0.0655819	-0.0342426	-0.375117	0.0107252	70.4567	67.097	53.8228	66.7356	60.2009	58.8966	46.2584	60.8127	67.3311	65.4726
chrX:2255840-2258073:-	crn-4	AH9.2	WBGene00000797	0.456625	0.00018053	0.0130261	0.224057	0.911337	0.675188	0.132077	0.485338	0.164444	0.614012	-0.520425	0.241259	-0.030797	-0.165649	0.335374	-0.223121	17.2492	23.6381	10.9695	17.0491	14.301	14.2783	20.7714	13.7089	18.0634	16.6562
chrII:10592691-10593471:+	crn-5	C14A4.5	WBGene00000798	0.494629	0.752864	0.409032	0.551843	0.0420454	0.699294	0.104679	0.363236	-0.169795	-0.0935556	-0.232932	-0.147905	-0.386878	-0.170765	-0.396174	-0.289844	20.2791	21.1879	16.8224	19.2989	16.5048	17.6463	14.8664	16.1175	22.4119	25.0635
chrIII:9367159-9370302:+	crn-6	K04H4.6	WBGene00000799	0.0495715	0.934072	0.00142984	0.772626	0.379939	0.497917	0.816557	0.951314	0.421199	0.0317035	0.758043	0.0869952	0.207946	0.275175	0.0943293	-0.03848	10.4449	7.69699	13.3703	7.60334	8.50971	9.23926	8.01232	7.21666	8.30221	8.29084
chrI:2623103-2628579:-	cars-1	Y23H5A.7	WBGene00000800	0.0104028	0.600974	0.0287046	0.291398	0.00445664	0.858683	0.484663	0.81153	-0.231378	-0.066596	-0.257103	-0.111121	-0.244214	0.049811	-0.103139	-0.0577506	84.2001	93.2632	73.5348	85.6214	79.8025	91.3864	82.0194	84.691	98.4116	107.917
chrV:6098976-6100536:-	crt-1	Y38A10A.5	WBGene00000802	1.1503e-10	7.76857e-06	2.63389e-07	7.87504e-07	1.62184e-17	0.786363	0.189286	0.912899	0.722625	0.526144	0.560578	0.568578	0.925645	0.0738649	0.180002	-0.0314744	664.134	569.15	825.476	555.778	733.978	584.181	629.984	542.1	618.332	431.994
chrX:15861224-15865843:-	csb-1	F53H4.1	WBGene00000803	3.78778e-44	0.0554702	0.246112	0.0498046	0.107916	0.721228	0.825769	0.506422	1.4696	0.267976	0.246123	0.265559	-0.217593	-0.135292	0.0661366	-0.193429	26.5529	11.1587	10.0589	10.5342	7.63981	7.58927	8.81541	7.27709	9.36333	10.1599
chrII:13596885-13597965:+	csc-1	Y48E1B.12	WBGene00000804	0.667629	0.502464	0.00326422	0.714533	0.66093	0.740137	0.152958	0.00011819	-0.0763399	0.113475	-0.416692	0.0648932	-0.0736673	-0.100371	-0.228927	-0.52569	56.4757	63.7809	44.9189	58.3483	54.1178	56.3265	51.4228	41.5278	67.5757	64.9716
chrI:71858-81071:+	csk-1	Y48G1C.2	WBGene00000812	0.0241	0.0185388	0.450973	7.08141e-05	0.292574	0.989169	0.656143	0.312118	0.229843	0.241539	-0.132434	0.369401	0.117793	0.00642613	0.0861921	0.188506	44.8341	44.6166	36.1037	46.1987	39.617	39.8726	42.217	45.4057	44.27	41.5287
chrV:17861344-17870625:-	csn-1	Y59A8A.1	WBGene00000813	0.283504	0.225006	0.0199983	0.44877	4.74625e-05	0.240569	5.1061e-06	0.332874	-0.127217	-0.143517	-0.306622	-0.0944749	-0.370516	-0.203662	-0.540719	-0.17425	59.0567	57.6376	44.5601	56.4339	47.5709	47.9694	37.709	48.963	61.8412	70.3701
chrI:6022662-6026983:+	csn-2	B0025.2	WBGene00000814	0.920473	0.658124	0.0573429	0.914587	0.000575333	0.985792	0.273673	0.817696	0.0185344	-0.0723776	-0.292765	0.0198545	-0.359088	-0.00934298	-0.187818	-0.0719871	89.1953	82.6844	61.2599	83.3819	65.2651	75.1128	66.0637	71.814	84.3581	95.8883
chrIV:194745-202585:+	csn-3	Y38C1AA.2	WBGene00000815	0.636537	0.854319	0.0204254	0.859468	0.00416349	0.931394	0.0358192	0.901892	-0.0666373	0.0310616	-0.32215	0.0281003	-0.277671	-0.0333503	-0.295062	-0.0393629	65.5074	69.3063	50.2971	65.3811	53.9683	61.8197	51.2891	61.5647	70.6397	74.7997
chrIV:1077490-1087013:-	csn-4	Y55F3AM.15	WBGene00000816	0.942028	0.804538	0.0154106	0.615292	0.322516	0.899631	0.0147056	0.986948	-0.0127662	0.0417272	-0.314084	0.0709546	-0.118813	0.0423518	-0.314398	-0.00657179	49.3651	50.6554	38.2348	48.8985	43.7947	49.3072	38.2296	47.603	53.3498	54.2659
chrIV:5649522-5651070:+	csn-5	B0547.1	WBGene00000817	0.50852	0.278179	0.0383511	0.242152	0.112729	0.632356	0.0167584	0.501166	0.0898671	0.136795	-0.315812	0.139795	-0.171638	-0.128973	-0.354753	-0.155268	71.5992	73.0436	52.0846	69.314	56.9215	59.5519	50.644	58.4512	72.8974	73.1907
chrIV:13300804-13303667:+	csn-6	Y67H2A.6	WBGene00000818	0.579946	0.520827	0.0101026	0.950595	0.00552982	0.581756	3.03457e-06	0.606524	-0.0746666	-0.0874253	-0.304252	0.0108011	-0.265943	-0.113553	-0.504965	-0.103881	69.4811	67.952	53.7319	68.9591	58.0548	61.4702	46.5941	61.9305	74.3666	79.7937
chrII:13601134-13604987:+	csp-1	Y48E1B.13	WBGene00000819	0.865027	0.311034	0.885262	0.127665	0.177127	0.356552	0.752417	0.00263203	-0.0999059	0.444876	-0.0936844	-0.607107	0.517598	0.494207	0.178597	-1.12212	0.90207	1.57302	1.56273	0.439259	1.60862	2.72225	2.0411	0.46371	1.9193	1.09683
chrIV:6307728-6315708:+	csp-2	Y73B6BL.7	WBGene00000820	0.0143479	0.0174035	0.28778	0.400076	2.64105e-07	0.84591	0.0115164	0.640657	0.683875	0.677745	0.349756	0.289317	1.23915	0.130337	0.694041	-0.235356	2.1805	2.14246	2.73944	1.46655	3.22401	2.29955	3.59693	1.69731	2.29606	1.33577
chrI:11888494-11889331:-	csp-3	Y47H9C.6	WBGene00000821	NA	NA	0.681117	0.730619	0.760541	NA	0.163714	NA	0.0229037	-0.132782	0.220547	-0.153687	-0.138767	0.026828	0.569372	-0.275977	0.52813	0.329256	0.785365	0.288102	0.320416	0.505714	1.42225	0.158619	0.517215	0.544144
chrX:14684808-14688296:+	csq-1	F40E10.3	WBGene00000822	0.118748	0.00208543	0.19326	4.8561e-05	0.0250006	0.257939	0.939181	0.97825	-0.162821	-0.287241	-0.158627	-0.360656	-0.209226	-0.165624	-0.0156527	0.00839769	165.263	149.428	155.235	134.432	152.99	154.493	171.724	174.662	193.672	201.901
chrM:4504-5621:+	ctb-1	MTCE.21	WBGene00000829	0.724737	0.972464	0.654197	0.637795	0.383655	0.860177	0.704623	0.960415	0.191083	0.0250215	-0.244291	0.239555	0.385696	0.163618	0.211439	0.0493666	1812.78	1439.32	1042.94	1803.15	2230.95	1610.58	1692.36	1429.27	1513.23	1514.95
chrII:14303536-14306217:-	ctl-1	Y54G11A.6	WBGene00000830	4.81585e-07	7.20531e-06	6.94387e-07	2.57449e-10	1.09754e-14	2.8393e-05	3.1692e-11	2.55096e-08	0.764803	0.701038	0.779061	0.936967	1.09669	0.690158	1.00351	0.860981	22.236	20.9593	24.0922	23.5277	27.0432	22.5384	28.3447	25.5462	15.1672	13.8331
chrII:14299477-14301974:-	ctl-2	Y54G11A.5	WBGene00000831	9.21452e-11	8.18157e-07	4.27103e-10	4.2744e-12	9.09053e-22	5.95839e-08	1.09804e-17	2.54058e-18	0.93591	0.74562	0.975723	0.995533	1.30605	0.875716	1.29177	1.31371	18.728	16.1005	21.0786	18.2587	23.3753	19.611	26.5244	26.9404	11.446	10.2868
chrI:2606756-2617363:+	ctn-1	Y23H5A.5	WBGene00000832	0.166561	0.999667	0.0308603	0.249748	0.00078482	0.217749	0.939923	0.477822	0.29068	0.000114885	0.476018	0.24807	0.572543	0.349872	0.0313241	0.236429	5.51939	4.389	6.61376	5.00549	6.49001	5.99163	4.7299	5.51911	5.14828	4.84391
chrIII:10214723-10216544:-	cts-1	T20G5.2	WBGene00000833	3.69294e-06	1.62053e-05	0.358337	0.0126376	0.0585809	0.159264	0.00283675	0.427302	-0.301422	-0.285865	-0.0995661	-0.176151	-0.13544	-0.15685	-0.25457	-0.104519	679.904	678.173	725.071	693.445	730.148	696.514	650.331	722.553	867.284	914.386
chrIII:13439627-13455206:-	cua-1	Y76A2A.2	WBGene00000834	0.816122	0.880592	0.0643565	0.501987	0.474979	0.848558	0.965821	0.914951	0.0316604	-0.0227882	-0.214581	0.0751069	0.0763631	0.0504514	0.00935055	0.0277181	53.2044	50.5412	45.0467	51.2274	52.5083	54.3261	52.7797	53.4646	58.4835	56.6852
chrIII:7860399-7860937:-	cuc-1	ZK652.11	WBGene00000835	0.434312	0.278494	0.0551525	0.998865	0.325997	0.545535	0.197601	0.586557	-0.158674	-0.212429	-0.395847	0.00100755	-0.180712	-0.200621	-0.286651	-0.179487	119.178	113.405	96.5716	125.027	112.144	111.637	104.738	113.466	144.519	145.749
chrIII:10471140-10475121:+	cul-1	D2045.6	WBGene00000836	1.90257e-07	2.40668e-07	0.850726	5.0146e-16	6.65441e-19	0.000449105	0.0154224	1.81824e-07	0.718069	0.71915	0.053326	1.07248	1.15304	0.576559	0.407553	0.781569	42.8606	42.3243	34.2502	51.7051	56.0994	50.0802	44.3093	58.1211	36.733	27.7487
chrIII:13687098-13692487:+	cul-2	ZK520.4	WBGene00000837	0.784926	0.766058	0.0574944	0.106193	0.374599	0.556643	0.953969	0.571115	-0.0358181	0.040575	-0.230231	0.15203	0.0901117	0.115712	-0.0123081	0.108116	75.9853	79.1028	67.3013	81.0275	79.3842	85.9892	78.5392	85.523	88.3654	84.8875
chrV:177422-184873:+	cul-3	Y108G3AL.1	WBGene00000838	0.666174	0.629989	0.0265803	0.00932705	0.356744	0.752947	0.784758	0.989469	0.0544373	0.0623338	-0.262943	0.231814	0.0956284	0.0775973	0.0497118	-0.00500281	93.9138	93.1495	78.4993	99.3769	92.457	99.9181	97.9699	94.2352	105.49	98.4545
chrII:7302060-7305717:+	cul-4	F45E12.3	WBGene00000839	0.204952	0.665412	0.319655	0.00202385	0.747623	0.735053	0.987113	0.99225	0.138744	0.0607392	-0.14496	0.284588	0.0430328	0.0855175	-0.0032849	-0.00390028	44.8731	41.9415	36.7318	46.4384	40.1121	43.2395	40.6196	40.6014	45.4175	44.3279
chrV:10179509-10183129:+	cul-5	ZK856.1	WBGene00000840	0.0668567	0.080656	0.971371	0.00246444	0.0284838	0.565017	0.0399704	0.406011	0.221233	0.21662	-0.00837702	0.332618	0.244406	0.116276	0.247792	0.142521	44.8025	44.1093	37.267	45.2558	43.545	40.6995	44.6875	41.4756	41.8157	41.7112
chrIV:12586462-12590404:-	cul-6	K08E7.7	WBGene00000841	0.0200782	0.671268	0.0199983	0.994789	0.0535162	0.773219	0.808759	0.334575	0.638355	-0.17386	0.635409	0.00508055	0.521798	-0.173164	-0.107443	0.363696	3.48129	1.76496	4.88147	1.93999	3.0245	2.55884	2.69094	3.9369	3.28104	2.25733
chrI:10398975-10400186:-	cup-2	F25D7.1	WBGene00000843	0.229633	0.00740052	0.186238	8.3341e-05	0.0501551	0.260827	0.00366263	0.726111	0.130295	0.251594	-0.166803	0.343266	0.182398	0.169882	-0.317469	0.0741044	114.048	122.61	104.298	123.775	113.128	132.413	93.7759	123.718	130.96	113.335
chrIII:7866443-7868661:+	cup-4	C02C2.3	WBGene00000845	0.00434252	0.902035	0.26283	0.0853631	0.00650664	0.323309	0.996385	0.699987	-0.582148	-0.042762	-0.292949	-0.377032	-0.531194	-0.314058	-0.00181543	-0.159481	8.04494	11.9558	9.25763	8.79988	8.01082	9.116	11.545	10.2554	12.9005	13.6065
chrIII:7584114-7591512:+	cup-5	R13A5.1	WBGene00000846	0.974941	0.983758	0.00473022	0.664207	0.0254698	0.774586	0.726757	0.560801	0.00604508	0.00391787	-0.389054	0.062619	-0.231617	0.0872675	-0.0733175	-0.133186	44.5913	43.9977	28.7567	43.3297	36.0474	40.4298	36.0573	34.5378	42.3898	48.3664
chrII:11269060-11271535:+	cut-1	C47G2.1	WBGene00000851	NA	NA	NA	NA	NA	NA	NA	NA	0.0440651	0.420586	-0.00618496	0.000214436	-0.0843175	0.0548699	0.413272	-0.0486764	0.0647379	0.27385	0.0209895	0.0413405	0.0147808	0.051435	0.283	0	0.0246676	0.0476375
chrIII:10911361-10916566:+	cut-6	M142.2	WBGene00000853	NA	NA	0.970498	0.893036	0.746394	NA	0.791119	NA	-0.0861091	0.189404	-0.0265344	-0.0738306	0.159504	-0.104299	0.151516	-0.11887	0.150022	0.281889	0.230475	0.146402	0.252021	0.193543	0.336606	0.181359	0.272142	0.205494
chrIII:7518562-7520739:-	cux-7	C07H6.8	WBGene00000854	0.629533	0.918559	0.089489	0.925839	0.0745968	0.965576	0.178563	0.818012	-0.0729258	0.0194442	-0.236241	-0.0171353	-0.198148	-0.0175953	-0.196403	0.0631488	37.9889	40.0426	29.5213	36.9413	33.2486	34.4728	30.3608	36.5243	38.9525	43.5805
chrII:130983-133592:-	cwn-1	K10B4.6	WBGene00000857	0.954765	0.89941	0.508397	0.991851	0.466774	0.339559	0.313737	0.804531	0.0245179	-0.0559738	0.229624	0.00711955	-0.224159	0.359134	0.315166	-0.138316	5.63754	5.22228	6.001	5.20183	4.42592	6.65274	6.42058	4.4829	5.58064	6.0285
chrIV:10067803-10070160:+	cwn-2	W01B6.1	WBGene00000858	0.585316	0.000815488	0.53978	0.147443	0.967337	0.952672	0.0480321	0.869925	0.235452	1.0194	0.300026	0.508246	-0.0230918	0.0682371	0.741062	-0.133572	2.06365	4.01508	2.41301	2.46339	1.5676	1.94075	3.651	1.57824	2.00932	1.80184
chrV:4840605-4841255:-	cwp-1	C37H5.10	WBGene00000859	NA	NA	NA	NA	NA	NA	NA	NA	-0.159161	-0.157781	-0.00674374	-0.074691	-0.0767465	0.0874194	0.214794	-0.0468899	0	0	0.0794169	0.165128	0.157354	0.274408	0.58104	0	0.0976733	0.369478
chrV:4841926-4842553:-	cwp-2	C37H5.11	WBGene00000860	NA	NA	NA	NA	NA	NA	NA	NA	-0.174626	0.0400794	0.033208	-0.0848836	-0.152339	0.098642	0.0697597	0.0302956	0	0.441736	0.082463	0.162417	0.0544631	0.248572	0.171872	0.0735347	0	0.386762
chrV:4842822-4843831:+	cwp-3	C37H5.4	WBGene00000861	NA	NA	NA	NA	NA	NA	NA	NA	0	0.0420006	0	0	0.0599915	0	0.033918	0.0319267	0	0.06708	0	0	0.0861104	0	0.0643997	0.0606172	0	0
chrV:5053604-5056458:+	cwp-4	K11D12.1	WBGene00000862	0.872356	0.703723	0.389673	0.358023	0.895427	0.916804	0.662054	NA	-0.0980886	0.211229	0.406714	-0.410351	0.0783793	0.108629	0.235157	0.00625083	0.524679	0.821614	0.740772	0.26718	0.653685	0.431619	0.552294	0.339551	0.370064	0.66999
chrIII:9106609-9109195:-	cya-1	ZK507.6	WBGene00000863	0.185018	0.174556	0.17102	0.00813339	0.410911	0.0739809	0.168089	0.442515	0.15707	0.163627	-0.198775	0.272687	0.100693	0.267796	0.198053	0.148832	44.0263	43.6729	32.4579	44.6066	40.458	45.2564	43.0765	41.5868	41.736	42.9238
chrII:2022678-2023619:-	cya-2	F59H6.7	WBGene00000864	0.0261425	0.700767	0.087711	0.00869796	0.710227	0.0359646	0.00182315	0.73357	0.771302	0.195851	0.610741	0.878972	0.174282	0.776275	0.992489	-0.224155	4.46569	2.55333	5.33226	4.60433	2.44641	6.13416	7.4019	2.45877	3.40057	2.30262
chrIV:10735304-10737161:+	cyb-1	ZC168.4	WBGene00000865	0.0105485	0.00391216	0.000581757	6.7547e-08	3.26451e-06	0.357759	0.52093	0.0937435	0.22056	0.246437	-0.301113	0.420157	0.359915	0.12291	-0.0773294	-0.177106	193.915	194.809	169.606	208.379	204.49	228.421	198.494	185.047	233.757	180.918
chrIV:10985964-10987405:+	cyb-2.1	Y43E12A.1	WBGene00000866	0.174731	0.00945776	0.000337132	8.08673e-05	0.629525	0.0938746	0.0359719	0.975524	0.137896	0.235549	-0.389702	0.330795	-0.0569515	0.227923	0.245997	0.00980777	154.967	163.786	111.361	165.727	129.21	172.47	174.691	147.8	163.715	153.208
chrI:4114736-4116371:+	cyb-2.2	H31G24.4	WBGene00000867	0.582106	0.0542302	6.18533e-05	0.000359235	0.61356	0.639615	0.116646	0.859219	0.0613046	0.171075	-0.462748	0.279947	-0.0544656	0.107444	0.210377	-0.0485571	186.323	198.683	136.464	202.878	164.262	204.714	220.257	183.237	211.564	194.427
chrV:15395679-15397331:+	cyb-3	T06E6.2	WBGene00000868	0.736435	0.207941	0.000171233	0.00171401	0.380038	0.588962	0.023715	0.929121	0.0412282	0.124256	-0.474361	0.255451	-0.0867483	0.12796	-0.308337	0.0289346	414.359	433.362	258.838	449.849	362.064	397.968	291.447	370.801	405.153	438.472
chrI:8022680-8024417:-	cyc-1	C54G4.8	WBGene00000869	0.000146357	0.00168302	0.0195322	0.0247345	0.00130196	0.637788	0.302456	0.362367	-0.300124	-0.257387	-0.233984	-0.191136	-0.252561	-0.0858878	-0.120407	-0.127506	299.055	304.036	296.345	301.688	295.716	328.921	321.02	319.432	389.743	402.117
chrII:12980522-12993049:+	cyd-1	Y38F1A.5	WBGene00000870	0.000907695	0.0345885	0.831749	1.65679e-06	0.0480883	0.240571	0.283302	0.922972	1.04262	0.733155	0.13728	1.42261	0.649595	0.610125	0.48875	0.0904471	1.95161	1.46157	0.767381	2.53025	1.31708	1.28794	1.13716	0.722127	0.718423	0.776529
chrI:6780807-6784535:+	cye-1	C37A2.4	WBGene00000871	0.558575	0.0573067	0.0077011	0.000353555	0.00143328	0.992406	0.88486	0.657711	0.0878417	0.229906	-0.292486	0.380164	0.335755	-0.00375604	0.027906	0.0867392	70.3152	76.8715	59.2082	80.768	80.1603	72.5894	74.2693	77.434	81.2226	71.9688
chrIII:7023585-7029139:-	cyk-1	F11H8.4	WBGene00000872	0.184429	0.0512977	0.997444	0.201899	0.156671	0.0590859	0.00401584	0.0976878	0.14712	0.203315	0.00106548	0.14095	0.146215	0.303482	0.391243	0.268046	26.2298	26.9365	22.6243	24.3845	25.0684	28.0931	29.9205	27.391	25.2176	25.7565
chrIII:6020116-6024604:+	cyk-3	ZK328.1	WBGene00000874	0.221596	0.3889	0.0948621	0.959795	0.0164296	0.989886	0.435957	0.765635	-0.126835	-0.098314	-0.23972	-0.00784757	-0.209816	-0.00587969	-0.13093	0.0785784	46.7414	47.071	37.1253	47.4854	42.1707	43.8645	40.1331	46.5999	49.1495	55.664
chrIII:13768440-13771141:-	cyk-4	K08E3.6	WBGene00000875	0.488285	0.00210634	0.124185	0.00920683	0.655571	0.166861	0.189904	0.162181	0.0841457	0.283365	-0.229706	0.242805	0.0558987	0.239229	0.201289	0.232593	105.976	120.26	76.183	110.673	99.3252	106.495	103.677	106.008	100.141	108.794
chrV:11990991-11993748:-	cyl-1	C52E4.6	WBGene00000876	0.164964	0.889123	0.00407117	0.304413	0.0229794	0.804807	0.00611446	0.290544	-0.149818	0.0228902	-0.342477	0.114909	-0.212728	-0.0683421	-0.326848	-0.172887	60.8792	67.8626	50.6139	68.5274	55.6989	61.4796	51.1877	57.1109	72.0161	73.7004
chrV:14356061-14356808:+	cyn-1	Y49A3A.5	WBGene00000877	0.000149771	0.000328194	0.0152182	0.133764	1.14347e-08	0.358995	0.00421985	0.0017065	-0.348291	-0.336293	-0.286146	-0.15897	-0.488555	-0.156229	-0.325827	-0.359164	198.029	196.985	188.564	211.463	171.568	206.746	183.361	179.112	257.618	275.767
chrIII:13692593-13693710:+	cyn-2	ZK520.5	WBGene00000878	0.0749101	0.175136	0.829125	0.19455	0.000131307	0.586457	0.231997	0.312898	-0.429012	0.341777	0.0881735	-0.32741	0.752517	-0.237285	0.338517	-0.344029	12.5657	22.4234	45.8185	12.741	29.5414	35.5752	55.6	32.7418	47.7078	19.0687
chrV:15189910-15190910:+	cyn-3	Y75B12B.5	WBGene00000879	0.590674	0.948728	0.492403	0.999357	0.0787783	0.835994	0.942053	0.959735	-0.060278	-0.00964971	-0.109407	-0.000197702	-0.14902	0.0591765	0.0168578	0.0160183	304.811	311.759	266.839	296.997	273.88	300.72	291.853	291.653	321.615	346.397
chrII:10870718-10872551:-	cyn-4	F59E10.2	WBGene00000880	0.780432	0.730705	0.262635	0.649149	0.00129777	0.346861	1.46488e-07	0.291447	0.0442045	-0.055745	-0.160175	0.0657635	-0.320688	-0.166706	-0.584727	-0.174345	51.3812	47.2661	40.6946	48.7553	37.9613	40.5151	30.0958	40.2999	50.8803	54.2561
chrI:15040416-15041263:-	cyn-5	F31C3.1	WBGene00000881	0.000975078	0.187995	0.656683	0.36814	0.000267874	0.594033	0.000337991	0.200098	0.308012	0.148469	0.0625897	0.105226	0.326938	0.0918954	0.327664	0.157116	475.146	418.654	449.402	384.913	460.595	458.783	541.606	480.343	479.644	416.605
chrIII:773399-774156:+	cyn-6	F42G9.2	WBGene00000882	0.0392589	0.388834	0.0180364	0.708679	0.00805702	0.899631	0.798244	0.971522	-0.415312	-0.210075	-0.547801	0.0995579	-0.486871	-0.0747332	0.0917404	0.0211776	19.8114	22.7704	15.9974	27.1872	17.977	22.992	26.1178	24.7625	27.163	29.4217
chrV:15186565-15187770:-	cyn-7	Y75B12B.2	WBGene00000883	0.538266	0.06543	0.228624	0.000269648	0.994811	0.356552	0.111225	0.797022	0.0643834	0.157073	-0.134274	0.271792	0.000827694	0.130501	0.166661	0.0517544	863.563	908.872	754.044	932.938	789.794	908.441	931.919	859.516	924.392	899.171
chrX:8911240-8914199:+	cyn-8	D1009.2	WBGene00000884	1.78944e-06	2.68747e-09	0.731977	0.000568798	0.190179	0.235078	0.00224603	0.360041	0.63593	0.777859	-0.10451	0.479819	0.205726	-0.318166	-0.598991	-0.260177	19.8685	21.7134	12.0108	16.6146	13.9458	10.2199	8.29876	10.7006	14.4855	13.6822
chrIII:3697802-3699624:-	cyn-9	T27D1.1	WBGene00000885	0.548	0.32994	0.0769354	0.877217	7.89705e-05	0.88442	0.00137518	0.736132	-0.102551	-0.15557	-0.295407	-0.0313811	-0.462765	-0.0575878	-0.484985	-0.101203	42.2415	40.1467	33.2528	41.5674	31.2309	39.4768	28.9909	38.2828	45.9198	49.5161
chrII:6912498-6913321:-	cyn-10	B0252.4	WBGene00000886	0.812512	0.741532	0.345369	0.245486	0.0367929	0.50027	0.088253	0.534507	0.0596465	0.0826801	-0.235008	-0.220954	-0.339331	-0.224089	-0.374477	-0.203836	38.8034	38.9385	28.8831	29.517	27.7467	29.1129	25.9952	29.5208	38.3385	40.4848
chrII:8715143-8716231:-	cyn-11	T01B7.4	WBGene00000887	0.567031	0.801244	0.0149981	0.538522	0.116767	0.850109	0.0185958	0.0371209	-0.0991415	0.0517241	-0.378272	0.101826	-0.209887	-0.0695996	-0.366989	-0.347469	69.6979	76.6102	57.5041	75.1655	61.5829	71.9515	57.9984	58.8503	84.31	81.494
chrIV:7132120-7133202:-	cyn-12	C34D4.12	WBGene00000888	0.888301	0.530394	0.0194373	0.692238	1.75171e-05	0.844058	0.0304879	0.354589	0.0295525	-0.10912	-0.374863	-0.0703611	-0.497365	-0.0733579	-0.350418	-0.205318	85.9197	76.7715	57.1621	74.7286	56.4031	71.1668	58.2163	64.6521	83.6255	91.6507
chrIV:17111046-17116630:-	cyn-13	Y116A8C.34	WBGene00000889	0.854949	0.886376	0.328794	0.62373	0.321456	0.812575	0.490529	0.971251	-0.0349522	0.0289067	-0.154518	0.0774522	-0.132865	0.0712299	-0.117033	-0.0125064	71.2936	73.589	60.1361	72.1494	63.6044	70.6117	61.7757	66.5419	74.8894	79.6254
chrI:8646445-8651775:+	sig-7	F39H2.2	WBGene00000890	0.398145	0.957676	0.262635	0.440301	0.796426	0.962012	0.0235938	0.846646	0.114372	-0.0109278	-0.204044	0.104998	-0.0407853	0.0236236	-0.360091	0.0649801	45.229	40.8573	33.224	41.9881	38.7535	39.177	29.6912	40.3632	42.9741	45.4349
chrI:13566086-13572052:-	cyn-15	Y87G2A.6	WBGene00000891	0.693864	0.778063	0.244869	0.446977	0.00784073	0.621599	0.000624205	0.6219	-0.058954	-0.0469014	-0.168097	0.0998677	-0.270078	-0.111602	-0.40744	-0.106923	42.5103	42.3032	36.6217	44.4221	35.0176	38.1052	30.8895	38.2594	46.0408	48.276
chrII:12028699-12036671:-	cyn-16	Y17G7B.9	WBGene00000892	0.169105	0.583567	0.185587	0.116445	0.494087	0.820258	0.0536024	0.840667	0.191639	-0.0964604	-0.248528	0.210694	0.10301	-0.0879672	-0.336836	-0.0726814	30.5279	24.5401	24.1674	28.8937	27.4033	27.1431	22.6619	27.4587	32.2903	29.0053
chrV:5799666-5805642:+	cyn-17	ZC250.1	WBGene00000893	NA	NA	5.71517e-05	0.800916	0.0175582	0.0978898	0.0317812	0.882713	0.327049	0.565223	1.48476	0.128206	0.817956	0.788033	0.872722	0.134105	0.215465	0.34763	1.91751	0.115617	0.486384	0.845696	0.94689	0.298792	0.23277	0.0738266
chrII:8226082-8229100:+	dab-1	M110.5	WBGene00000894	0.425676	0.556648	0.0097167	0.0471956	0.0113981	0.0266662	0.0778668	0.388258	-0.0824468	0.0669548	-0.2805	0.169883	0.201587	0.262841	0.202067	0.135056	108.635	119.038	97.4862	121.111	126.795	143.11	137.098	130.755	132.578	125.387
chrIII:816240-821723:+	dac-1	B0412.1	WBGene00000895	0.226195	0.669833	0.367322	0.0471138	0.680168	0.977739	0.963453	0.929081	-0.459328	0.201485	0.371413	-0.683098	-0.180212	0.0323019	0.0300287	0.0729859	1.58171	2.86579	3.15746	1.18125	1.9668	2.34634	2.33959	2.43015	2.53625	2.64408
chrI:6553480-6554293:-	dad-1	F57B10.10	WBGene00000896	0.451768	0.268575	0.620996	0.344101	0.00566517	0.985767	0.649483	0.495465	0.10629	0.148769	-0.107248	0.125916	-0.296137	0.009956	-0.0992323	-0.164429	183.427	186.545	146.681	173.853	131.892	159.581	147.574	140.873	176.825	185.331
chrIV:132416-138076:+	daf-1	F29C4.1	WBGene00000897	0.000279474	0.388814	0.116442	0.442774	0.216545	0.583175	0.914249	0.532168	0.434118	-0.14132	0.267689	0.121604	0.16955	-0.152045	-0.0309493	0.157933	21.8523	14.3044	18.872	16.3454	17.3051	13.9439	15.2157	17.4323	17.3559	17.4704
chrIII:2995755-3028792:-	daf-2	Y55D5A.5	WBGene00000898	7.66163e-06	0.000412223	0.761705	1.40693e-08	2.9164e-14	0.0016286	0.00611446	0.000368877	0.455699	0.374995	0.0626645	0.562834	0.721929	0.417939	0.355455	0.449057	33.6728	31.3738	30.7113	33.9168	38.877	39.5619	37.8449	40.45	32.7514	26.553
chrX:817926-825474:-	daf-3	F25E2.5	WBGene00000899	0.00369106	0.992656	0.464696	0.759183	0.2038	0.970149	0.780052	0.611739	0.417859	0.0024755	0.156356	0.0658342	0.201397	-0.0200195	0.0729138	0.144087	11.6522	8.52314	10.5065	8.44365	9.53152	9.2543	9.89028	10.4188	10.4643	9.38694
chrIII:5624972-5632277:+	daf-4	C05D2.1	WBGene00000900	0.228445	0.591577	0.37926	0.0759426	0.567063	0.483444	0.28153	0.628414	-0.163974	-0.0888767	-0.159706	-0.222288	0.0838788	-0.16479	-0.18594	-0.123845	15.1108	15.7295	15.5419	13.5455	17.2287	15.479	15.2524	15.9443	19.4389	18.4956
chrII:14033159-14037647:-	daf-5	W01G7.1	WBGene00000901	0.00110557	0.458894	0.0319437	0.0274856	2.00159e-13	0.716897	0.530917	0.100625	0.543891	0.170468	0.415732	0.391157	1.08204	0.139973	-0.15849	0.358745	12.3871	9.29428	14.7069	10.3595	17.5119	11.9883	9.62546	14.0911	12.0727	9.04229
chrX:14888418-14894257:+	daf-6	F31F6.5	WBGene00000902	0.997927	0.941668	0.0345384	0.799991	0.658195	0.680467	0.52746	0.818012	-0.00227265	0.0488075	0.861438	-0.141015	0.221201	0.315108	0.32932	0.194811	0.389883	0.410174	1.04777	0.305226	0.482147	0.5545	0.570168	0.478402	0.404449	0.42553
chrIII:811822-813758:+	daf-7	B0412.2	WBGene00000903	0.896279	0.411716	0.185699	0.322719	0.3924	0.979535	0.644914	0.818313	0.0566213	-0.276973	0.423916	-0.307694	-0.259786	-0.025978	0.185937	-0.141401	5.09345	3.84489	5.29444	3.56566	3.78094	3.68191	4.37251	3.33613	4.18635	5.3079
chrI:8584536-8587501:-	daf-8	R05D11.1	WBGene00000904	0.31972	0.0415554	0.97602	0.102527	0.717575	0.664655	0.622882	0.263945	0.219767	-0.408963	-0.0131255	-0.330854	-0.0916761	-0.178526	-0.148183	0.315407	12.5551	7.77779	9.8092	7.80645	9.53873	8.65681	8.85768	12.5389	11.0522	11.6354
chrX:6196892-6200783:+	daf-9	T13C5.1	WBGene00000905	0.557789	0.652691	0.629436	0.751844	0.533736	0.765883	0.932686	0.130795	-0.272997	-0.228847	0.253384	-0.158183	-0.270954	-0.24201	-0.058654	-0.678987	0.932546	0.964037	1.47459	0.981477	0.89665	0.897694	1.08171	0.538062	1.28094	1.33608
chrIV:9136919-9146196:-	daf-10	F23B2.4	WBGene00000906	0.27765	0.632948	0.908146	0.357059	0.37595	0.955314	0.939181	0.923377	-0.472292	-0.252334	0.0832516	-0.405569	-0.378128	-0.0697212	0.0575836	-0.0917827	0.314194	0.401752	0.489461	0.319588	0.337887	0.405347	0.471243	0.388274	0.489333	0.581903
chrV:11718071-11725634:-	daf-11	B0240.3	WBGene00000907	0.944647	0.730673	0.677735	0.281902	0.962502	0.984111	0.755428	NA	-0.0426797	-0.196238	0.241004	-0.471905	-0.0308723	-0.0272891	0.189471	0.00042729	0.267486	0.212185	0.288488	0.126844	0.257919	0.195458	0.270672	0.20504	0.227587	0.309008
chrX:10644344-10666806:+	daf-12	F11A1.3	WBGene00000908	0.775174	0.367906	0.283663	0.656868	4.34812e-06	0.683929	0.231671	0.19609	0.0873908	0.232875	0.272086	-0.126482	0.824781	0.170033	0.296217	0.347628	3.10492	3.42122	3.74914	2.46264	5.13991	3.46953	3.81147	3.95887	3.39794	3.16312
chrIV:10250624-10255822:+	daf-14	F01G10.8	WBGene00000910	0.430337	0.692411	0.360336	0.247505	0.456314	0.871437	0.36977	0.291591	0.191051	0.11377	0.23821	-0.262585	-0.173513	0.0861159	0.233643	0.30135	13.7395	12.8051	13.1699	9.1436	10.0167	11.7475	13.1201	13.8029	12.2873	12.9879
chrIV:9386191-9394905:+	daf-15	C10C5.6	WBGene00000911	0.151909	0.649139	0.0765707	0.0216183	0.550806	0.994925	0.157721	0.604602	0.133428	0.0551032	-0.215558	0.193779	0.0628506	0.00287616	-0.179204	0.101269	63.582	59.4093	46.9924	61.9459	57.8754	54.8453	48.2174	58.8049	61.0585	63.0718
chrI:10750332-10776689:+	daf-16	R13H8.1	WBGene00000912	2.06067e-07	0.00563542	0.200264	1.0826e-07	1.93881e-20	0.733036	0.759885	0.117786	0.622023	0.366498	0.207106	0.635231	1.03582	0.101476	0.0673583	0.261745	19.5491	16.0825	18.848	18.437	25.1052	17.4544	17.0487	19.5902	18.1173	13.6349
chrIV:419987-425173:-	daf-18	T07A9.6	WBGene00000913	0.00980089	0.00124697	0.000198876	1.45343e-06	0.166451	0.00671142	0.0183934	0.998035	0.201955	0.24592	-0.428986	0.344597	0.115991	0.345261	0.290033	-0.00155688	219.026	222.903	146.985	226.043	197.209	254.757	244.979	199.144	222.377	207.107
chrII:10157478-10169262:-	daf-19	F33H1.1	WBGene00000914	0.00757953	0.856364	0.608429	0.00636308	0.000624578	0.51491	0.590254	0.666223	0.494258	0.0573057	0.135808	0.501005	0.583207	0.203538	-0.141896	0.147429	6.13429	4.37661	6.10648	5.75808	6.25791	6.41257	4.97054	6.15616	6.15646	4.62936
chrV:14684903-14688528:+	daf-21	C47E8.5	WBGene00000915	0.448138	0.0278704	0.124005	0.0444429	0.0501898	0.896251	0.945325	0.504056	-0.0750256	0.179067	-0.165901	0.162954	-0.154779	0.0339347	-0.0129694	0.103575	1220.42	1437.9	1111.07	1347.02	1103.67	1278.95	1237.41	1343.22	1392.86	1401.09
chrI:332610-337845:+	daf-25	Y48G1A.3	WBGene00000917	0.980416	0.541137	0.0886607	0.792755	0.496918	0.746916	0.0148912	0.77638	-0.00558138	0.111154	-0.321222	-0.0518328	-0.11043	-0.119586	-0.431613	-0.100269	29.7156	31.8726	23.6564	26.8613	26.362	27.4431	21.8109	27.7834	33.3594	32.4994
chrV:19815414-19816188:+	daf-28	Y116F11B.1	WBGene00000920	NA	NA	0.436773	NA	0.0909724	NA	0.454	NA	0.223639	0.283101	0.34317	0.349917	0.537262	0.351723	0.326912	0.469698	0.506958	0.622196	1.07571	0.72437	1.12945	1.09025	1.03549	1.42168	0.298934	0.0964264
chrII:4562850-4563543:+	dao-2	M03A1.7	WBGene00000928	0.140325	0.274977	3.88823e-08	7.54794e-10	2.91573e-05	3.61172e-07	1.9322e-06	0.573523	0.595967	0.480994	1.87062	1.95898	1.35932	1.78209	1.65249	0.363106	2.24929	1.93284	12.6945	7.79817	4.60142	11.6962	10.2896	2.37549	1.42771	1.0952
chrX:8084159-8086501:-	dao-3	K07E3.3	WBGene00000929	0.502795	0.0556943	0.0770055	0.0824682	0.474111	0.44401	0.953425	0.00139933	-0.125456	-0.299434	-0.36536	-0.268116	-0.123467	0.226569	0.0207979	0.588463	25.8986	22.5452	15.7741	21.8197	24.7982	24.4258	20.9902	31.8534	23.0631	30.8829
chrX:10075229-10076299:+	dao-4	ZC373.6	WBGene00000930	0.431016	0.811247	3.56086e-10	0.303984	0.000490176	0.0247154	0.00942006	0.912899	0.352273	0.134713	2.14302	0.430838	1.17916	0.966893	1.00986	0.102659	0.567074	0.317507	9.18272	0.626104	1.85452	2.79708	2.93168	0.863406	0.755251	0.211556
chrI:10187505-10190886:-	dao-5	C25A1.10	WBGene00000931	0.369462	0.000721854	0.784736	0.000179308	0.0123393	0.494872	0.905093	0.951805	0.119923	0.357028	0.0462254	0.385107	0.264934	0.118605	0.0228638	0.016244	75.3629	87.9289	75.1696	84.9237	79.8318	79.0893	73.9272	73.5801	81.1278	75.4001
chrIII:9735178-9735943:-	dao-6	T05G5.12	WBGene00000932	NA	NA	0.0823952	NA	0.93993	NA	0.650013	NA	-0.0478508	0.19521	0.647937	0.117342	0.035678	0.436622	0.220968	0.0067035	0.33608	0.889834	2.00837	0.671286	0.496905	1.33087	0.758314	0.308651	0.297309	0.476425
chrII:10581074-10582460:+	dap-3	C14A4.2	WBGene00000933	0.100953	0.583488	0.33374	0.278284	0.0151435	0.22631	0.00354626	0.0951981	-0.1801	-0.0772939	-0.14705	-0.127205	-0.236268	-0.201779	-0.357776	-0.241831	70.1887	74.5182	68.8786	68.0697	64.519	66.2161	59.2818	64.3729	85.2867	86.82
chrIII:9242835-9246710:+	dat-1	T23G5.5	WBGene00000934	0.406432	0.468441	0.661666	0.157931	0.754334	1	0.915485	0.636627	-0.381351	-0.353811	0.250365	-0.580884	-0.162844	0.000252396	0.0757961	-0.330941	0.583092	0.595717	0.903462	0.423722	0.715573	0.67241	0.740913	0.431086	0.752075	0.980761
chrII:5456288-5458599:+	daz-1	F56D1.7	WBGene00000935	0.0679048	0.000426134	0.165606	0.000150538	3.18588e-08	0.0166578	0.87907	0.157027	0.191489	0.333306	-0.169496	0.350115	0.478338	0.279372	0.0289897	0.18715	84.27	91.9153	69.0831	87.9536	98.6241	94.8301	79.4751	88.8646	86.8428	80.1825
chrV:6758118-6760392:+	dbl-1	T25F10.2	WBGene00000936	0.863707	0.793246	0.173347	0.705262	0.308325	0.958537	0.510229	0.951688	-0.0852533	-0.126473	0.459995	-0.162059	0.345058	0.04967	0.260856	-0.046581	2.32281	2.20767	4.10749	2.03881	3.19752	2.9061	3.48456	2.6912	3.12102	2.72497
chrI:6490718-6492729:-	dbr-1	C55B7.8	WBGene00000937	0.981665	0.901933	0.104409	0.839108	0.0610753	0.725205	1.70033e-06	0.736132	0.00436724	-0.023972	-0.249248	-0.0351926	-0.213324	-0.102658	-0.623735	-0.091703	36.049	34.8838	28.7947	32.7486	29.5403	31.9815	21.9961	32.2268	38.3966	39.1472
chrI:7536200-7542153:-	dcp-66	C26C6.5	WBGene00000938	3.66104e-07	1.74302e-09	0.0891828	0.291705	2.90112e-05	0.710409	2.06023e-10	0.000838909	0.433019	0.507472	0.207357	0.116097	0.354677	0.0852343	0.627511	0.365882	63.4081	65.9901	47.1914	47.3541	57.3721	43.2869	63.5474	52.8123	45.4652	50.9161
chrIII:8071850-8080208:-	dcr-1	K12H4.8	WBGene00000939	8.25153e-05	0.00118017	0.556129	4.69498e-12	8.31645e-07	0.000174497	0.0233578	0.00889809	0.36707	0.31383	-0.0961615	0.606252	0.43712	0.433983	0.275984	0.319952	43.2283	41.122	34.2097	47.7893	43.4349	49.8273	44.552	45.9596	40.8538	36.3464
chrV:20087404-20090711:-	dcs-1	Y113G7A.9	WBGene00000940	0.666004	0.272474	0.221006	0.865979	0.0141917	0.095116	6.6007e-07	0.333577	-0.0764005	-0.168187	-0.223751	-0.0333763	-0.299225	-0.318139	-0.729755	-0.214842	46.6022	43.0672	36.238	44.8601	38.015	33.8759	25.0769	36.4603	47.5166	53.6118
chrIII:1859879-1860365:+	ddp-1	Y39A3CR.4	WBGene00000941	0.000124131	8.57695e-06	0.00878601	0.0109376	6.98685e-05	0.618894	0.0675537	0.0793479	-0.431786	-0.499874	-0.375464	-0.301494	-0.42793	-0.128556	-0.276985	-0.28536	123.893	116.475	113.138	127.097	118.809	134.901	121.464	120.778	165.258	183.475
chrIV:7085207-7094353:-	deb-1	ZC477.9	WBGene00000942	0.25594	0.0221932	0.10357	1.40255e-06	0.0666047	0.656729	0.647949	0.000667148	-0.126614	-0.225288	0.182601	-0.423338	-0.176697	-0.0874797	-0.0672614	-0.342476	43.3248	39.8888	53.0662	32.8612	39.9887	43.8627	44.4854	36.6367	52.0271	51.5914
chrX:7763158-7774864:+	deg-1	C47C12.6	WBGene00000950	0.847287	0.98796	0.789189	0.144163	0.974451	0.677295	0.617675	0.907416	-0.102674	-0.0092967	-0.150042	-0.545049	0.018444	-0.283302	-0.24498	-0.0960085	1.08814	1.17294	1.30141	0.655005	1.16164	1.1433	1.18722	1.36569	1.6688	1.30747
chrV:11412852-11415141:-	deg-3	K03B8.9	WBGene00000951	0.811701	0.659155	0.759222	0.292962	0.797725	0.916761	0.944289	0.530885	-0.131389	-0.231204	0.174762	-0.443481	0.132887	0.105144	-0.0494633	-0.373145	1.01724	0.901381	1.54756	0.676424	1.2662	1.45228	1.24419	0.891323	1.46021	1.27278
chrX:14271889-14276970:+	del-1	E02H4.1	WBGene00000952	0.594637	0.848413	0.777686	0.516526	0.932091	0.998969	0.875424	0.947456	-0.270978	-0.119394	0.175411	-0.312165	0.0526496	-0.00355694	0.107407	0.0645529	0.387636	0.473253	0.786196	0.339245	0.564542	0.632221	0.72259	0.685225	0.703876	0.610049
chrIV:9636963-9641986:-	del-2	F58G6.6	WBGene00000953	0.976908	0.804022	0.375429	0.694311	0.568696	0.92828	0.328677	NA	-0.019652	-0.147985	0.428144	-0.205773	0.274829	0.0987692	0.456082	0.154949	0.400389	0.321297	0.585841	0.276303	0.563345	0.338813	0.614576	0.372132	0.299061	0.448679
chrV:11415324-11420274:-	des-2	T26H10.1	WBGene00000955	0.0907292	0.163495	0.753155	0.061599	0.489714	0.811848	0.762602	0.697828	-0.569908	-0.497585	0.162997	-0.612294	-0.258018	-0.184768	-0.158195	-0.242865	1.30932	1.37945	2.18863	1.18054	1.64948	1.60611	1.63979	1.51793	2.11255	2.35214
chrX:984618-991232:-	dgk-1	C09E10.2	WBGene00000958	0.780783	0.999667	0.346721	0.910141	0.529787	0.867777	0.943269	0.456872	-0.103327	-0.000120154	0.272825	-0.0462946	0.192024	-0.0997306	-0.0330187	-0.27395	2.76962	2.9662	4.49045	2.72147	3.33934	3.3668	3.54998	2.94431	4.06311	3.2746
chrX:4494888-4504581:-	dgk-2	F46H6.2	WBGene00000959	0.190438	0.879156	0.671682	0.668199	0.0877398	0.958348	0.821854	0.866354	0.220621	0.039085	0.102514	0.0877624	0.255565	-0.0275831	-0.0612015	-0.062393	11.5846	10.0323	12.4226	9.83743	11.3555	11.3035	11.027	11.0111	12.8606	10.7596
chrIII:9162999-9167949:+	dgk-3	F54G8.2	WBGene00000960	0.981014	0.52738	0.937076	0.914853	0.143095	NA	0.76335	NA	-0.0144015	0.311542	0.0583816	0.0641034	0.572862	-0.0961545	-0.177523	-0.0803691	0.155425	0.28922	0.27003	0.172393	0.403383	0.205092	0.171027	0.21013	0.272832	0.174493
chrX:10920540-10928919:-	dgn-1	T21B6.1	WBGene00000961	0.0455648	4.42501e-05	0.0140458	0.00168511	0.000235942	0.0149233	0.00442971	0.740312	0.323297	0.590647	0.458367	0.466164	0.512702	0.481623	0.514024	0.119853	10.448	12.514	12.2491	10.8315	11.4513	12.4501	12.7505	9.53478	9.73894	8.99554
chrI:4386788-4401981:+	dhc-1	T21E12.4	WBGene00000962	3.76534e-07	1.90974e-06	0.87494	6.27599e-15	5.42694e-19	0.00290692	0.104479	0.0165479	0.34621	0.329932	-0.0277737	0.511374	0.572929	0.308891	0.178306	0.255016	113.414	110.633	108.899	118.943	127.134	138.067	125.928	132.922	123.867	96.9519
chrI:7238994-7243965:-	dhp-1	R06C7.3	WBGene00000963	0.309137	0.110058	0.0544836	0.00814583	0.119391	0.136626	0.606113	0.324896	-0.186633	-0.274715	0.322899	-0.406562	0.243092	-0.299587	-0.115683	-0.22167	16.4285	15.2168	25.3434	13.0744	21.4197	16.1627	18.4593	17.097	22.3999	20.4798
chrIV:9978165-9980749:+	dhp-2	C47E12.8	WBGene00000964	0.00472356	0.0842395	0.961233	0.00481819	0.0442578	0.896111	0.46315	0.756401	-0.497204	-0.335738	0.0207401	-0.493736	-0.350369	-0.0732427	0.198713	-0.130114	9.27587	10.3162	13.0368	8.68889	9.88612	12.1459	14.903	11.6331	14.3165	14.5712
chrI:5278807-5281519:-	dhs-1	C01G8.3	WBGene00000965	0.949842	0.459935	0.158131	0.710409	0.137199	0.744134	0.96672	0.921926	-0.0120914	-0.113956	-0.237846	-0.0610226	-0.182161	0.103503	0.0122722	0.0354805	52.5642	48.2722	37.7119	47.4255	44.5494	48.2311	45.1835	45.9526	49.962	57.7683
chrI:5354163-5357031:+	dhs-2	F55A12.4	WBGene00000966	0.452388	0.0154871	0.100156	0.107982	0.98803	0.406951	1.84698e-05	0.0674521	-0.227894	0.576568	-0.43961	-0.420345	-0.00571157	0.301401	0.929716	0.489735	3.7649	6.93926	3.22225	3.01317	4.28523	5.74682	9.25955	6.63475	5.08258	4.90276
chrI:8212356-8218355:-	dhs-3	T02E1.5	WBGene00000967	2.26911e-05	0.00305111	0.00137843	9.18019e-05	8.67527e-08	0.614457	0.613621	0.842344	-0.510097	-0.377341	-0.43803	-0.473926	-0.608322	-0.127455	0.0979522	0.0600574	37.982	41.2171	30.5339	36.4618	33.8623	38.1242	44.8275	43.6344	46.6226	59.5658
chrI:9647594-9649209:-	dhs-4	T05F1.10	WBGene00000968	0.547631	0.911913	0.816612	0.93299	0.119391	0.606517	0.00459152	0.0101072	-0.257124	-0.0605723	-0.130704	-0.04584	-0.521435	0.314107	0.929363	0.885952	2.66262	3.1464	2.22254	3.02435	2.00288	3.37872	5.76494	5.53985	2.79885	3.66212
chrII:5453830-5455959:+	dhs-5	F56D1.5	WBGene00000969	0.951483	0.797647	0.415775	0.78472	0.443393	0.963557	0.193094	0.573274	-0.0264314	0.105766	0.286849	0.104088	-0.238544	0.041519	0.409715	0.26152	4.93808	5.42161	5.64547	5.10747	3.98408	4.64214	6.23065	5.53884	4.99339	5.49614
chrII:5617107-5619301:-	dhs-6	C17G10.8	WBGene00000970	0.673127	0.723065	0.590894	0.890972	0.232765	0.909846	0.954735	0.618485	0.0571878	0.0517376	-0.0980892	-0.0211933	-0.126358	0.0403938	0.0138102	0.11318	71.6554	70.4599	58.0612	63.3505	60.2124	64.1274	62.9037	67.5121	69.4655	74.9767
chrII:7206949-7208338:-	dhs-7	E04F6.7	WBGene00000971	0.900837	0.141275	0.862123	0.712685	0.647881	0.973286	0.86836	0.571158	0.0473467	-0.387955	0.0778354	-0.118521	-0.136853	-0.0296866	0.074133	0.244489	8.60935	6.06272	6.80055	7.07085	7.1429	6.26768	6.78271	7.7598	7.14027	9.04625
chrII:14497951-14499611:+	dhs-8	K10H10.3	WBGene00000972	0.861006	0.121899	0.620783	0.281902	0.427793	0.269164	0.0268676	0.482522	-0.100785	0.604748	-0.273453	0.438948	-0.333846	0.58984	0.876032	0.423209	1.36802	2.71715	0.679501	2.19656	1.03082	1.96647	2.65287	1.64411	1.10088	1.65886
chrIII:5364473-5368006:-	dhs-9	Y32H12A.3	WBGene00000973	0.00526542	0.000163018	0.512759	0.00159624	1.10249e-06	0.0902778	5.22504e-05	0.138692	0.475083	0.618236	0.169023	0.524615	0.736288	0.387795	0.717473	0.342655	20.5148	22.4818	18.6174	19.8674	23.7204	21.8712	27.9119	21.1856	18.3018	15.7472
chrIII:10640787-10642973:-	dhs-11	Y39A1A.11	WBGene00000974	0.918981	0.728829	0.0607099	0.374968	0.063314	0.783173	0.915485	0.709134	-0.0254829	-0.0799931	-0.3574	0.160861	-0.28311	0.108752	-0.0344069	0.124345	30.658	29.081	21.8247	32.7885	24.3408	30.7684	27.7076	31.1089	31.6838	34.0232
chrIV:10145227-10146203:+	dhs-12	K08F4.9	WBGene00000975	0.107501	0.900639	0.86944	0.339669	0.000986317	0.336425	0.258083	0.26257	-0.248534	0.0299857	-0.0395837	-0.16011	-0.433139	0.193236	0.184307	-0.209282	61.0555	73.5429	62.6531	60.7972	51.1338	73.9725	73.5637	55.4706	71.9219	79.5343
chrV:1765319-1771727:-	dhs-13	F36H9.3	WBGene00000976	0.232374	0.650896	0.679842	0.00245513	9.89462e-07	0.0531293	0.0201046	0.166134	0.200582	0.095795	0.11222	0.42433	0.627227	0.407824	0.434361	0.314105	41.5411	37.9892	40.4796	45.5354	53.9485	50.271	51.2982	46.9353	41.5575	39.1469
chrV:2763962-2765223:-	dhs-14	R05D8.8	WBGene00000977	0.00325698	0.218073	0.00125598	0.813038	3.88362e-07	0.312083	0.478007	0.000141146	-0.500603	-0.249119	-0.634717	-0.0602727	-0.780205	-0.286734	-0.184025	0.700533	16.7369	19.8843	12.4035	21.5779	13.041	16.0408	17.3525	33.3316	22.2057	26.3268
chrV:2768417-2769846:-	dhs-15	R05D8.10	WBGene00000978	0.430219	0.0867023	0.969719	0.136033	0.0694947	0.669776	0.731492	0.122924	-0.368716	-0.701987	0.0299889	-0.609721	-0.691405	-0.324556	-0.205574	-0.725074	1.42714	0.914047	2.05607	0.987689	0.918439	1.32996	1.54536	0.728998	2.22516	2.3454
chrV:5983728-5985494:+	dhs-16	C10F3.2	WBGene00000979	NA	NA	0.551712	0.274941	0.906978	0.477511	0.655645	0.000640056	-0.375616	-0.0700265	0.314794	-0.446388	-0.0670813	0.443004	0.247258	1.26834	0.207238	0.412461	1.08184	0.153267	0.393674	1.25328	0.999949	2.92603	0.806093	0.514575
chrV:6026313-6034797:-	dhs-17	F29G9.6	WBGene00000980	0.980917	0.317465	0.00573201	0.872227	0.0158632	0.61479	0.614976	0.426441	-0.0070184	-0.218105	-0.613456	-0.0445059	-0.411427	-0.200894	-0.154832	-0.263334	13.0452	11.0318	7.58344	11.8519	9.26875	10.3722	10.7542	9.89913	13.4833	14.2841
chrV:11045678-11046877:-	dhs-18	C45B11.3	WBGene00000981	0.573854	0.0860761	0.626437	0.303332	0.815859	0.849588	0.857045	0.804515	-0.134021	-0.33974	0.156826	-0.216535	0.0597107	0.104779	-0.070155	0.119147	17.6073	14.9308	19.245	15.4959	19.4033	18.5246	16.2048	18.7153	19.066	21.1713
chrV:11489031-11490343:-	dhs-19	T11F9.11	WBGene00000982	0.195939	0.598175	0.0910389	0.19505	0.00613672	0.477491	0.778856	0.753066	-0.215618	-0.108558	-0.305795	-0.213589	-0.380921	0.189059	0.0737451	-0.103117	31.8463	33.9551	27.3084	29.799	27.0333	39.112	36.0052	31.6797	38.0861	40.531
chrV:11602294-11604545:-	dhs-20	F35B12.2	WBGene00000983	0.75944	0.405476	0.0937902	0.643465	0.641045	0.83712	0.33291	0.568826	0.115416	-0.27682	0.450676	-0.162402	0.156405	-0.122777	0.292964	-0.240732	6.29414	4.52235	10.148	4.71033	6.20819	6.49203	8.97766	5.90943	7.97552	6.24833
chrV:12731755-12733610:-	dhs-21	R11D1.11	WBGene00000984	0.462931	0.000766126	0.732876	0.0618911	0.0582128	0.000242349	0.0417609	0.188914	-0.14027	-0.500991	-0.0953273	-0.297072	-0.284536	-0.65942	-0.388942	-0.301111	31.1089	23.6395	32.155	25.9686	26.8004	21.2453	25.8993	27.6406	38.465	37.4917
chrV:14420037-14421435:-	dhs-22	C15H11.4	WBGene00000985	0.548483	0.000861569	0.0252313	0.405529	0.012072	0.975946	0.0530502	0.959208	-0.0725089	-0.296396	-0.276104	-0.0925296	-0.21998	-0.012366	-0.244169	-0.0162616	113.138	95.3814	82.4954	104.232	97.5362	99.5069	84.3959	99.1989	111.951	129.697
chrV:15381080-15382288:+	dhs-23	R08H2.1	WBGene00000986	0.949742	0.768337	0.398801	0.131514	0.697274	0.760719	0.0568657	0.396582	-0.0338445	-0.150795	0.396983	-0.546658	-0.172668	0.246797	0.745488	0.46363	2.84325	2.52083	3.37776	1.62248	2.39304	2.89746	4.79405	3.61933	2.46487	3.19677
chrV:19934764-19946598:-	dhs-24	Y60A3A.10	WBGene00000987	0.0105937	0.00151926	0.115533	0.449328	0.227743	0.0557764	1.17428e-08	0.00103334	-0.278913	-0.339784	-0.260978	-0.102211	-0.142136	-0.333557	-0.779292	0.479468	34.9579	33.045	34.0437	37.0152	36.829	32.3031	23.4133	57.9972	45.8391	46.4024
chrX:1486497-1489324:+	dhs-25	F09E10.3	WBGene00000988	8.02346e-18	0.684262	1.34156e-09	0.703754	0.292841	1.00367e-06	9.12705e-14	0.288858	-0.760031	-0.05998	-0.757969	-0.0533704	-0.118459	-0.638754	-0.915132	-0.202939	93.9834	152.155	95.838	144.705	141.446	104.419	85.6303	142.709	184.098	175.138
chrX:3360672-3362480:-	dhs-26	ZK816.5	WBGene00000989	0.49499	0.00636858	0.664414	0.0222264	0.348915	0.0208203	4.15001e-05	1.99591e-17	-0.331149	-1.02588	-0.240459	-0.871491	0.403238	0.94021	1.41216	2.67224	0.953588	0.296427	0.698481	0.395215	2.00634	2.84769	4.49696	13.7415	1.08724	1.53223
chrX:3412870-3414693:-	dhs-27	C04F6.5	WBGene00000990	0.00263655	0.976849	0.623965	0.0419666	0.563387	0.882082	0.619479	0.822254	0.666399	0.0135069	-0.190123	0.48122	-0.169721	-0.102848	-0.19075	-0.13244	11.4831	6.86375	6.345	9.32362	5.78435	6.82372	6.34912	6.66432	8.26448	7.50155
chrX:6818399-6820034:+	dhs-28	M03A8.1	WBGene00000991	0.335993	0.752124	0.00040479	0.678372	0.238147	0.970149	0.0562578	0.901471	0.105588	-0.0445994	0.388475	0.0520364	0.117304	0.0140775	0.232304	0.0338671	103.944	92.2891	117.035	93.4929	100.208	89.7514	104.764	91.0241	99.1088	105.118
chrX:7661851-7664863:-	dhs-29	F27D9.6	WBGene00000992	0.815961	0.30783	0.773223	0.664357	0.810784	0.989771	0.461062	0.969538	0.0921595	0.317431	-0.130535	0.152035	0.0884534	-0.0130178	0.268766	0.0295014	4.60227	5.43568	4.77785	4.51476	4.39039	5.27926	6.63251	5.46677	5.94586	4.65314
chrX:17230645-17235763:-	dhs-30	T25G12.7	WBGene00000993	0.0616579	0.620237	0.0505915	0.892831	0.271625	0.817621	0.924706	0.721791	-0.31256	0.11012	-0.354155	-0.0337413	-0.190345	-0.0921554	0.0297662	-0.115838	22.7114	30.4523	20.2527	26.0253	23.7474	24.5452	26.8067	24.1135	29.2723	31.0571
chrIV:8692086-8696443:+	dic-1	F08B4.1	WBGene00000994	0.690537	0.775235	0.184011	0.975765	0.124154	0.788883	0.174107	0.937623	-0.0680322	0.0539287	-0.203222	0.00657576	-0.193859	0.0809747	-0.206835	-0.0259802	26.6982	28.7794	20.5282	26.2758	23.3477	25.1683	20.4779	23.3059	26.4905	30.526
chrII:10061314-10074384:-	die-1	C18D1.1	WBGene00000995	0.0241305	9.73169e-05	0.478029	1.2499e-09	0.0101103	0.0809007	0.00799052	0.64551	0.353171	0.564306	-0.196589	0.822003	0.375903	0.430671	0.547565	0.172284	11.1183	12.7756	7.39284	14.5652	10.8094	11.8154	12.9001	9.74036	9.5496	9.37385
chrIV:7551539-7552997:-	dif-1	F49E8.5	WBGene00000996	0.714108	0.846907	0.0495605	0.632805	0.982796	0.731976	0.789231	0.886674	-0.0563282	0.0342169	-0.254736	0.0688745	-0.0038735	0.0881051	-0.0524587	0.0404812	83.3233	87.6477	69.2995	85.0911	82.7064	88.4278	80.0338	85.4872	92.6615	94.4725
chrIII:6746253-6794709:+	dig-1	K07E12.1	WBGene00000998	0.216075	0.997003	0.0335341	0.866399	3.082e-07	0.122268	0.0659814	7.39138e-05	0.178944	-0.000792885	0.295022	-0.0331625	0.575718	0.254659	0.260198	0.498349	16.0857	13.9679	20.4913	12.9354	20.4244	19.9083	19.9866	23.6907	18.5111	15.4205
chrX:8050421-8058170:-	dim-1	C18A11.7	WBGene00001000	0.370156	0.168155	0.0354318	0.733346	0.0107795	0.820636	0.90028	0.104611	0.110834	-0.161189	0.269946	-0.0489164	0.248525	-0.0662101	0.0277913	-0.236034	72.8368	59.3178	93.1324	60.8388	76.7256	73.3521	78.4045	64.9948	85.7322	73.3621
chrIV:10097187-10106535:+	dis-3	C04G2.6	WBGene00001001	0.936649	0.982529	0.126639	0.401394	0.262302	0.801587	0.517567	0.982199	0.0123046	0.00363147	-0.199247	0.0912953	-0.111208	0.0681464	-0.10099	-0.00785267	54.7684	53.758	44.0224	54.0854	48.0242	53.2213	47.2103	50.4319	56.5692	59.1506
chrIII:10244958-10248814:-	div-1	R01H10.1	WBGene00001002	0.415061	0.0188075	0.0411856	0.0118101	0.344599	0.836509	0.917352	0.718905	0.116086	0.275406	-0.316451	0.286376	0.123482	0.0723648	0.0279549	0.100998	39.7431	43.8814	29.8333	41.8997	38.2106	39.4558	38.2176	40.2659	41.7765	39.8671
chrIII:6462853-6463749:-	dlc-1	T26A5.9	WBGene00001005	0.969227	0.684262	0.0145794	0.288053	0.489547	0.987722	0.504005	0.0779241	0.00574426	0.0492335	-0.240226	0.101949	-0.0696303	-0.00571704	-0.0847212	-0.194608	458.298	466.674	376.273	458.004	415.627	443.845	419.869	388.658	497.097	497.187
chrX:5479668-5484904:+	dlg-1	C25F6.2	WBGene00001006	2.36441e-07	0.0658737	0.00561153	0.446634	0.0533335	0.908102	0.121778	0.889799	0.548562	-0.240836	0.418309	0.112491	0.226877	-0.04829	-0.262973	-0.0495966	16.9532	9.54676	15.2465	11.6257	12.903	10.9057	9.32326	10.8867	12.5785	12.5096
chrIV:13096959-13098789:-	dli-1	C39E9.14	WBGene00001007	0.859209	0.0573625	0.519038	0.260782	0.574029	0.830612	0.212307	0.587074	0.0338565	0.239971	-0.113103	0.152995	0.0839676	-0.0663879	-0.187569	0.119763	57.5918	65.7375	52.2254	58.5757	57.053	53.9704	49.5219	61.6335	63.1454	61.2383
chrI:12565789-12572791:-	dlk-1	F33E2.2	WBGene00001008	1.28479e-69	0.506599	1.12628e-09	6.63362e-56	3.82866e-07	0.879795	0.778473	0.81267	1.54572	0.0973456	0.813994	1.39141	0.481002	-0.0591345	-0.0683794	0.0774415	48.4197	17.1673	30.1858	40.5666	21.8415	16.0851	15.9771	17.7531	18.7172	17.6819
chrII:11778088-11782162:+	dna-2	F43G6.1	WBGene00001016	0.000536885	1.99653e-05	0.140709	8.604e-09	2.25517e-06	0.000574688	1.2857e-06	0.226543	0.330141	0.399342	-0.181785	0.515634	0.421511	0.375009	0.484008	0.173073	42.861	44.3976	34.8451	45.6216	43.7152	51.6618	55.7936	44.7811	44.1918	36.9829
chrIV:10926253-10933139:-	dnc-1	ZK593.5	WBGene00001017	3.21753e-05	0.000558851	0.415775	4.69498e-12	1.95237e-11	0.331462	0.993801	0.0368019	0.396849	0.341327	-0.11511	0.624699	0.595963	0.15554	-0.00152297	0.251881	41.9883	39.8283	40.0646	46.0536	46.2153	48.5062	43.4149	51.9314	48.4761	34.554
chrIII:5924346-5925709:-	dnc-2	C28H8.12	WBGene00001018	0.231335	0.696853	0.0818905	0.974593	0.0176704	0.897657	0.335649	0.982986	-0.15625	-0.0649803	-0.285459	0.00634134	-0.258913	-0.0518291	-0.177929	0.00982341	57.2119	60.2548	46.9974	60	50.8731	55.6249	50.7798	58.126	64.3816	69.6323
chrIV:11298986-11304765:+	dnj-1	B0035.14	WBGene00001019	0.404727	0.486728	0.302871	0.064641	0.00958717	0.703241	0.913299	0.850645	-0.121237	-0.108808	-0.149332	-0.22927	-0.292618	0.0917312	-0.0239568	0.0495042	45.5693	45.4046	40.6914	39.3713	38.5725	48.2755	44.4834	46.8694	50.4804	54.099
chrIV:11312451-11313954:-	dnj-2	B0035.2	WBGene00001020	0.991862	0.989811	0.0173946	0.677482	0.520614	0.905792	0.906857	0.41985	0.00213491	0.0029834	-0.349593	0.0731159	-0.101382	0.045552	0.0302826	-0.17255	40.1511	39.676	31.2151	39.4927	35.6567	41.5027	41.0201	35.4799	44.7793	43.6674
chrV:15068673-15069490:+	dnj-3	C01G10.12	WBGene00001021	0.759415	0.719341	0.206207	0.760651	0.0887901	0.419622	0.00516152	0.431191	0.0914584	0.109843	-0.344086	-0.090165	-0.356235	-0.293277	-0.66496	-0.280293	20.8231	20.8386	15.0217	16.9679	14.2218	15.596	11.6743	15.7677	21.8017	21.1797
chrI:5282086-5283946:-	dnj-4	C01G8.4	WBGene00001022	0.732441	0.809196	0.205237	0.670658	0.334965	0.611888	0.534483	0.968822	0.0852731	-0.0667324	-0.279864	0.100771	-0.189523	0.173937	0.157528	0.020603	20.9773	18.5365	15.5646	19.851	16.4069	21.7696	21.5305	19.4659	21.3723	21.4699
chrII:6853426-6858255:-	dnj-5	C04A2.7	WBGene00001023	0.00566197	8.83578e-06	0.187588	9.37685e-06	0.000106374	0.0827448	0.000418838	0.110762	0.240261	0.364065	-0.188748	0.358441	0.31145	0.258925	0.41976	0.235897	88.8261	95.6389	63.7545	90.1213	89.2805	87.649	98.3048	86.2431	81.3387	81.7235
chrX:7194521-7198236:+	dnj-7	C55B6.2	WBGene00001025	0.0012541	0.659155	0.0118832	0.000156696	0.004881	0.857766	0.74646	0.700136	0.407113	0.0854749	0.368285	0.464604	0.347914	-0.0645723	-0.0729417	0.105193	24.5357	19.2381	28.4562	23.8574	22.4883	20.8768	20.7175	23.5434	24.3542	19.97
chrII:6594344-6598038:-	dnj-8	C56C10.13	WBGene00001026	0.307986	0.878303	0.0795354	0.403086	0.161825	0.408405	0.920335	0.891215	0.129797	0.0280489	-0.232848	0.108823	-0.159195	0.155048	0.0228492	0.0393564	57.2023	52.6071	40.2841	52.6263	44.5842	53.0808	48.3262	48.9006	53.0447	56.8339
chrII:4852052-4857706:+	dnj-9	F11G11.7	WBGene00001027	0.358706	0.665214	0.0858839	0.99091	0.278267	0.921587	0.0768392	0.501049	-0.11519	-0.0652817	-0.245842	0.00303265	-0.124564	-0.0365476	-0.250962	-0.141153	55.266	56.5558	48.7675	56.09	52.5073	56.6125	48.5899	52.5518	64.8406	65.3071
chrIII:8631085-8633491:+	dnj-10	F22B7.5	WBGene00001028	0.843723	0.999332	0.819008	0.116815	0.0152492	0.472701	0.723004	0.77645	0.0392591	-0.000227521	-0.0508286	0.212233	0.292072	0.154219	0.0721343	0.0773546	36.7118	35.2155	35.4511	38.791	42.0315	41.0206	38.6901	38.8329	40.9843	38.877
chrIV:6585860-6588177:+	dnj-11	F38A5.13	WBGene00001029	0.628738	0.752497	9.17045e-05	0.239596	0.0217657	0.976904	0.023348	0.705803	-0.0522035	0.0382209	-0.377596	0.105472	-0.176385	0.0102877	-0.238028	-0.0727624	145.021	152.502	106.641	151.261	127.124	140.152	117.67	132.214	155.246	163.856
chrI:14756847-14759343:+	dnj-12	F39B2.10	WBGene00001030	0.0339439	0.0821465	0.00710789	0.000816857	1.92032e-05	1.16249e-11	2.08108e-10	9.46631e-25	0.794187	0.687305	0.460067	1.15873	1.40974	1.01411	0.950444	1.46656	36.9403	32.4326	32.7693	50.6619	66.9153	48.9895	46.8198	68.1068	26.0836	15.9994
chrII:11545637-11547302:+	dnj-13	F54D5.8	WBGene00001031	2.09753e-07	4.10589e-07	0.888872	3.14737e-19	2.58287e-12	0.000344687	0.000105912	0.0393612	0.577965	0.570849	0.0330599	0.950068	0.743305	0.467593	0.482335	0.299961	107.17	105.141	108.947	130.378	115.22	148.559	150.151	131.839	118.675	77.3036
chrX:4709797-4711715:-	dnj-14	K02G10.8	WBGene00001032	0.091442	0.893462	0.852913	0.434209	0.638307	0.734815	0.818913	0.821291	0.271411	-0.0349155	0.0543502	0.144699	0.0914822	-0.123623	-0.0650178	-0.0844364	29.4568	23.3092	24.6704	25.1117	24.735	21.6874	22.6312	22.3207	26.4789	26.3734
chrIV:4176379-4178354:+	dnj-15	K08D10.2	WBGene00001033	0.330864	0.000243365	0.0166387	0.752827	0.0533104	0.0521187	0.00835612	0.244256	-0.165312	-0.505707	-0.435019	-0.0634731	-0.271052	-0.395493	-0.469167	-0.271451	46.6037	35.9842	36.6738	46.8017	41.3066	37.7135	35.7989	41.4008	56.3152	57.1777
chrIII:4191115-4193398:+	dnj-16	R74.4	WBGene00001034	0.841971	0.28998	0.04068	0.999119	0.0732484	0.970041	0.57877	0.912922	0.0334603	-0.137045	-0.280278	-0.000391919	-0.192806	0.0159336	-0.0993819	0.0338282	57.0373	49.9026	41.7511	52.0299	46.4747	51.5594	47.5013	52.231	56.8879	60.682
chrIII:13390746-13393780:-	dnj-17	T03F6.2	WBGene00001035	0.116865	0.976865	0.0179464	0.000704793	0.000377413	0.872457	0.00624717	0.749365	0.271825	-0.00910274	-0.385767	0.507722	0.513101	0.0635696	-0.432764	0.0990502	24.5608	19.7674	19.1661	27.172	27.9621	26.4605	18.5021	27.1932	28.2411	21.953
chrIII:4697952-4699418:+	dnj-18	T04A8.9	WBGene00001036	0.679504	0.697639	0.194479	0.616667	0.865509	0.985941	0.0833703	0.452553	0.0998538	-0.100064	-0.305128	0.114823	-0.0443494	-0.0130397	-0.385584	-0.235975	19.0169	16.2178	13.7888	17.9564	16.3661	17.1175	12.9628	14.5141	19.3004	19.2575
chrV:5503017-5504834:-	dnj-19	T05C3.5	WBGene00001037	0.898843	0.667047	0.546653	0.514366	0.00300519	0.709478	0.765146	0.315469	-0.0182345	0.0537878	-0.0893914	0.0710047	-0.240643	0.0821785	-0.0507718	0.15111	216.321	224.5	186.255	215.108	176.979	210.257	191.44	220.777	221.31	238.671
chrII:9617427-9624117:-	dnj-20	T15H9.7	WBGene00001038	0.0347539	0.452885	0.00310584	0.874716	1.91165e-07	0.655099	0.504855	0.573274	0.271158	-0.122452	0.408986	-0.0310107	0.573124	0.119783	0.123472	0.133168	72.0322	53.7733	68.8178	54.1836	85.3781	55.8669	56.0775	56.4618	57.2515	64.664
chrI:5676830-5677710:+	dnj-21	T19B4.4	WBGene00001039	0.322136	0.633294	0.0113972	0.302232	0.0674746	0.0795355	0.0024267	0.149771	-0.191842	-0.110585	-0.447206	-0.195331	-0.296117	-0.361191	-0.520216	-0.305348	49.4838	51.8224	40.3163	46.1829	43.8725	42.8564	38.1845	44.6958	62.2953	61.993
chrV:8461009-8462173:-	dnj-22	T23B12.7	WBGene00001040	0.0943756	0.967968	0.259561	0.0830334	0.796073	0.801502	0.908594	0.889	0.212526	-0.00908714	-0.191602	0.216079	-0.0438513	0.0829786	-0.0300174	-0.0467243	52.037	43.8863	37.8988	48.7192	41.4806	46.1075	42.5709	42.0816	48.5205	48.7348
chrII:9107319-9108502:-	dnj-23	T24H10.3	WBGene00001041	0.60681	0.872088	0.00267778	0.0316355	0.312185	0.413742	0.817499	0.971251	0.0784157	0.030768	-0.377729	0.24545	-0.128113	0.158234	-0.047967	0.0122795	81.8944	78.1383	58.0789	86.1315	67.6594	85.1106	73.514	76.7315	84.8438	84.3874
chrIII:5416096-5419526:-	dnj-24	W03A5.7	WBGene00001042	0.9508	0.964895	0.50187	0.680856	0.978155	0.983997	0.439977	0.799917	-0.025773	0.020708	0.223711	-0.143811	0.0117903	-0.0183768	0.246798	-0.135256	11.1791	11.4466	14.2781	9.54239	11.0133	11.859	14.5213	10.782	13.3672	12.4264
chrV:20729917-20744308:-	dnj-25	W07A8.3	WBGene00001043	0.622715	0.742526	0.686957	0.477603	0.76312	0.795411	0.818913	0.812006	0.069359	-0.052109	-0.0724024	0.0919531	0.0432917	0.0714205	-0.045509	0.0612834	33.5855	30.4157	27.69	31.8814	31.529	30.6573	28.2206	30.4423	32.5064	34.8344
chrIV:12251161-12252641:-	dnj-26	Y39C12A.8	WBGene00001044	0.000137522	0.00928718	0.968255	0.0643712	0.411456	0.281122	0.983006	0.989469	0.522248	0.384204	-0.0137054	0.284995	0.141187	0.256335	-0.00728539	-0.00748455	38.3656	34.3326	23.7049	30.1761	27.8879	28.8613	23.8182	23.8351	26.7229	28.6789
chrI:11877794-11887272:+	dnj-27	Y47H9C.5	WBGene00001045	0.0028356	0.583567	0.00173704	0.239732	0.00527236	0.788883	0.841226	0.651024	-0.463169	-0.120312	-0.604654	-0.211715	-0.415219	0.117494	0.0650912	0.157319	8.46204	10.7218	6.94261	9.49363	8.3834	11.8583	11.4248	12.2197	12.1414	12.9094
chrI:2996408-3001380:+	dnj-28	Y54E10BL.4	WBGene00001046	0.0371573	0.134164	0.958972	0.000154233	1.43089e-10	1.77245e-07	0.000467187	4.06128e-09	0.491221	0.38512	-0.0235682	0.80243	1.24823	1.0595	0.744987	1.15646	9.23961	8.40125	6.75515	10.9295	15.6821	15.3224	12.1374	16.5207	7.65758	6.86981
chrI:14104417-14113167:-	dnj-29	Y63D3A.6	WBGene00001047	0.635288	0.803846	0.0242502	0.13453	0.515948	0.971139	0.60064	0.917481	0.0654544	0.0394923	-0.249487	0.163455	0.0807014	-0.0127963	-0.0779779	-0.0266063	79.0808	76.546	68.4588	79.1688	76.4499	80.9116	77.277	80.1244	91.0702	82.2573
chrI:2718028-2721479:-	dnj-30	Y71F9B.16	WBGene00001048	0.743977	0.592482	0.0487442	0.303412	0.717519	0.965497	0.109344	0.849095	0.0613134	0.0970965	-0.30906	0.155228	-0.0638122	-0.0203683	-0.260474	-0.0616921	53.0804	53.7333	40.89	53.0476	46.4279	50.365	42.388	48.9128	57.0251	55.3376
chrI:15016889-15022969:-	dog-1	F33H2.1	WBGene00001049	5.09152e-05	3.32856e-05	0.472298	1.72078e-10	3.24346e-17	5.85523e-06	2.91125e-08	8.56522e-11	0.73674	0.760031	0.186114	1.10021	1.39479	0.828268	0.966346	1.10666	11.2822	11.3322	8.45063	13.785	17.5472	13.5609	15.0505	16.6802	8.18711	7.06969
chrI:5003352-5005163:+	dom-3	F54C1.2	WBGene00001050	0.172978	0.830746	0.151687	0.805691	0.02227	0.829975	0.952158	0.928965	0.207217	0.047213	-0.252168	-0.0499071	-0.303546	0.0793146	-0.01756	-0.0342638	32.468	28.5793	20.8698	25.2024	21.5353	26.5433	24.7375	24.4483	27.9494	30.4868
chrIV:8513906-8514711:+	cks-1	C09G4.3	WBGene00001051	0.389355	0.159585	0.0122609	0.126923	0.513497	0.592624	0.755069	0.901551	0.117753	0.178856	-0.346229	0.184618	-0.089938	0.128652	-0.0657469	-0.0396739	133.48	137.689	82.0643	130.697	110.164	115.287	100.354	102.227	117.315	133.765
chrX:4411355-4416054:-	dop-1	F15A8.5	WBGene00001052	0.456625	0.844157	0.414938	0.0805655	0.576248	0.469729	0.52264	0.955456	-0.314258	-0.107359	0.37155	-0.62479	-0.234738	0.414275	0.303908	0.0516738	1.20647	1.44705	1.82769	0.83101	1.24358	1.89484	1.71727	1.34207	1.42225	1.76186
chrV:9608538-9614918:+	dop-2	K09G1.4	WBGene00001053	0.00217488	0.789785	0.323975	0.000269738	0.0499947	0.737057	0.977029	0.928559	-0.917177	0.124354	-0.384506	-1.06877	-0.589216	-0.22718	0.018449	-0.0701544	0.877903	2.15114	1.51865	0.705905	1.13647	1.74364	2.157	1.99721	2.36874	2.14144
chrV:15471317-15476080:+	dpf-1	T23F1.7	WBGene00001054	0.363114	0.909989	0.843055	0.029207	0.835554	0.364896	0.878491	0.69652	-0.287355	-0.0497854	-0.0850444	-0.585771	-0.0795447	-0.341706	-0.0683319	-0.184921	2.59	3.09254	3.55318	1.90628	2.92265	2.90228	3.59459	3.28016	4.22882	3.55128
chrX:14831755-14838118:+	dpf-2	C27C12.7	WBGene00001055	0.190281	0.348643	0.615782	0.761269	0.0246599	0.516322	0.613406	0.486629	-0.229469	-0.180068	0.106231	-0.0670321	0.329811	-0.163306	-0.106755	0.162867	9.96945	10.2003	17.2503	10.4759	14.2768	14.1932	14.7944	17.9578	17.8257	12.8215
chrI:6838353-6843342:+	dpf-3	K02F2.1	WBGene00001056	0.693647	0.349293	0.0905334	0.0541712	0.910142	0.511342	0.459617	0.532168	0.0450239	0.0943444	-0.222347	0.162169	0.0145545	0.132349	0.114942	0.122795	102.707	104.934	81.2377	104.119	96.1427	104.512	103.24	103.807	106.124	108.398
chrIII:5859264-5861860:+	dpf-4	F01F1.5	WBGene00001057	0.348152	0.376833	0.165104	0.671796	0.0122127	0.578936	0.0128613	0.941445	-0.110295	-0.107914	-0.193595	-0.0562591	-0.23381	-0.121059	-0.310784	-0.0225914	68.9249	68.1295	56.3246	66.8979	60.4176	59.338	51.8357	63.623	72.1264	81.1518
chrIV:4802699-4806578:-	dpf-5	R11E3.8	WBGene00001058	0.000392373	0.000976611	0.985302	4.62044e-09	2.64575e-18	0.000157805	0.15275	1.1415e-05	0.378411	0.359006	0.00623268	0.58872	0.835443	0.572585	0.249118	0.633113	81.1651	78.9578	73.7828	87.989	107.288	111.046	87.9339	116.023	81.9144	67.5946
chrIII:8038175-8041308:+	dpf-6	F44B9.1	WBGene00001059	0.418494	0.977618	0.240382	0.961572	3.85454e-05	0.801669	0.170146	4.86652e-06	0.265518	0.0145215	0.398389	-0.0217858	0.960323	0.16888	0.44985	1.2057	2.65598	2.1381	3.04671	1.96832	4.37131	2.5268	3.17994	5.84253	2.43394	2.33445
chrIV:4799375-4802584:-	dpf-7	R11E3.7	WBGene00001060	0.477623	0.600314	0.0607538	0.303356	0.0502325	0.227531	0.74646	0.937578	0.0908969	0.0741436	-0.242802	0.120671	-0.196044	0.194999	0.0601364	0.023515	45.85	44.7338	32.6778	43.7236	35.8063	44.5958	40.5303	39.4868	43.3202	46.8347
chrII:9169849-9172502:+	dpl-1	T23G7.1	WBGene00001061	1.63305e-06	1.42543e-07	0.120918	1.37035e-10	5.08715e-10	0.0784067	0.644392	0.0674497	0.495075	0.54271	-0.233071	0.642624	0.60775	0.281689	0.0890485	0.279269	40.8678	41.7309	29.6274	42.3676	42.3262	42.7893	37.3153	42.7378	39.0476	31.3253
chrV:13940125-13942168:-	dpr-1	R10D12.2	WBGene00001062	NA	NA	NA	NA	NA	NA	NA	NA	0.0391097	0.0830562	0.034864	0	0.0277775	0	0.363609	0.0316891	0.0274512	0.0589451	0.0266835	0	0.0187904	0	0.305305	0.0237945	0	0
chrIII:2034967-2047987:-	dpy-1	M01E10.2	WBGene00001063	0.000152524	0.595731	2.31495e-15	0.00460648	0.118548	0.806751	0.132908	0.584208	1.33235	0.275726	2.63738	1.03238	0.610288	0.223301	0.653012	0.365758	0.39017	0.0758905	1.22787	0.256509	0.144808	0.0669186	0.146807	0.090176	0.0251669	0.032172
chrII:6714256-6715961:+	dpy-2	T14B4.6	WBGene00001064	0.847688	0.13113	0.00110756	0.973101	0.607934	0.0451347	0.121853	0.52531	0.105969	0.583824	1.0692	-0.0206484	0.228659	0.775362	0.581964	-0.358772	1.63027	2.54527	4.33551	1.33921	1.75605	3.3747	2.84214	1.13669	1.82428	1.59201
chrX:2144596-2145641:-	dpy-3	EGAP7.1	WBGene00001065	0.723294	0.798525	0.00985134	0.412973	0.329457	0.0512102	0.155856	0.962901	0.189344	-0.149468	1.01995	0.373781	0.418665	0.878159	0.621056	-0.049395	0.738034	0.374174	2.18838	0.905319	0.974534	1.84284	1.3069	0.366256	0.448863	0.573977
chrIV:14985511-14986750:-	dpy-4	Y41E3.2	WBGene00001066	0.94842	0.900223	3.88996e-06	0.649988	3.73203e-17	0.0141907	0.0251562	0.960637	0.0336443	0.0684287	1.66842	0.195611	2.21474	1.04246	0.904604	-0.0516021	3.08625	3.14361	61.9828	3.36088	18.5744	29.2069	24.3499	4.57944	5.76746	3.24621
chrI:5432161-5433057:-	dpy-5	F27C1.8	WBGene00001067	0.844984	0.80872	2.70203e-08	0.499391	2.73841e-14	0.0102953	0.0382957	0.654636	-0.0943949	0.116782	1.94199	0.258675	1.93498	1.0701	0.841537	-0.314725	4.79199	5.71954	114.145	6.15752	24.9402	44.7178	34.1896	6.1629	12.0313	5.67221
chrX:8450325-8455587:-	dpy-6	F16F9.2	WBGene00001068	0.25158	0.041285	0.876443	0.00661452	3.21634e-07	0.270103	0.00821509	0.0956768	0.403818	0.645733	-0.0913941	0.795849	1.32081	0.506738	0.869101	0.642493	0.841415	1.02214	0.786073	1.09618	1.70604	1.34795	1.85232	1.52064	0.946311	0.635125
chrX:7536414-7537746:-	dpy-7	F46C8.6	WBGene00001069	0.732734	0.645019	0.00255316	0.70164	0.129925	0.0353852	0.267801	0.65701	0.18201	0.245439	1.16724	0.197613	0.593701	0.933243	0.514318	-0.314671	0.56254	0.620811	3.03416	0.540827	1.00118	2.35185	1.39576	0.307751	0.688615	0.421263
chrX:5148647-5150445:-	dpy-8	C31H2.2	WBGene00001070	0.702712	0.830746	1.58625e-06	0.275036	0.340098	0.000474099	0.056356	0.945123	-0.20065	-0.127917	1.6284	-0.469806	0.400835	1.28906	0.755947	0.0661157	0.84898	0.912495	4.05615	0.563653	1.53682	2.97065	1.74587	0.792449	0.794022	1.16351
chrIV:257382-259204:-	dpy-9	T21D12.2	WBGene00001071	0.669345	0.793495	0.00224723	0.462151	0.347525	0.14079	0.0113336	0.790758	-0.206356	-0.142463	1.04961	-0.317999	0.366428	0.650163	0.892724	-0.196994	1.93688	2.03855	5.94803	1.61906	3.17632	4.17052	5.18601	1.78315	2.44329	2.58558
chrII:6710116-6712898:-	dpy-10	T14B4.7	WBGene00001072	0.401675	0.00139872	0.277025	0.0330766	0.000527971	0.000791324	0.00426888	0.00205593	0.356376	1.05466	0.44723	0.743849	1.08209	1.13976	0.961708	1.04435	1.24932	2.38229	1.68639	1.69461	2.34382	3.13145	2.69218	2.88775	1.18265	0.926889
chrV:6511530-6515223:-	dpy-11	F46E10.9	WBGene00001073	1.45685e-07	3.25234e-14	0.441086	6.78662e-09	2.74132e-20	0.0119601	7.98302e-10	2.00795e-05	0.693777	0.967367	0.130882	0.757969	1.13929	0.351401	0.706027	0.517569	52.3315	62.8366	40.2372	51.2049	68.8893	47.0449	60.6317	53.0104	40.883	34.5268
chrIV:4235607-4236699:+	dpy-13	F30B5.1	WBGene00001074	0.207685	0.451481	3.03683e-09	0.100078	4.11062e-20	0.000968422	0.00221671	0.947456	0.412787	0.282768	2.01298	0.503592	2.17598	1.26627	1.13637	-0.062686	6.27978	5.54733	92.0919	6.3614	24.6149	43.1222	37.5312	8.65008	10.5188	4.77594
chrI:6843594-6845135:+	dpy-14	H27M09.4	WBGene00001075	0.000507498	0.000652649	0.528967	5.34072e-18	0.955447	0.392031	3.97068e-05	NA	1.22169	1.21332	0.302321	2.7119	-0.0351082	0.461149	1.36962	0.196155	1.63413	1.60115	0.378203	5.80547	0.315655	0.574974	2.57298	0.259823	0.0679603	0.299663
chrIII:5107291-5108550:+	dpy-17	F54D8.1	WBGene00001076	0.00116418	5.1672e-08	0.911609	3.01359e-14	0.106248	0.011067	1.30588e-14	0.00103951	0.921582	1.43929	-0.0707954	1.91112	0.493926	0.913255	2.19799	1.07729	4.21082	6.33353	1.53227	8.70541	2.82437	3.93957	11.6455	4.55236	1.83189	2.00453
chrIII:11372781-11377880:-	dpy-18	Y47D3B.10	WBGene00001077	0.00900429	0.347724	1.99532e-07	9.30362e-05	9.96936e-11	0.0147087	0.145484	0.575055	0.395084	0.179884	0.816999	0.552362	0.834992	0.46151	0.286408	0.166701	15.7441	13.2953	26.2623	16.4698	20.6492	20.266	17.8347	16.3317	16.1129	12.8715
chrIII:8659793-8667394:-	dpy-19	F22B7.10	WBGene00001078	0.976683	0.720583	0.120197	0.656868	0.935495	0.960117	0.33291	0.665363	-0.0118581	0.118854	-0.44953	0.133802	-0.0289599	0.0412195	-0.308381	-0.204517	4.23815	4.62667	2.95904	4.42989	4.00218	4.36589	3.31035	3.59488	4.71652	4.65903
chrIV:11696758-11699867:-	dpy-20	T22B3.1	WBGene00001079	NA	NA	0.0571652	NA	NA	NA	0.715939	NA	0.0412713	0.0519805	0.672196	-0.00186876	0.317682	0.0597777	0.179323	-0.112622	0.0890204	0.0929759	0.59952	0.0627861	0.220205	0.133988	0.200762	0.0401112	0.102977	0.0745355
chrV:17936306-17949002:-	dpy-21	Y59A8B.1	WBGene00001080	2.10815e-06	1.14372e-06	0.0477732	3.54336e-10	6.91678e-35	0.00921086	0.00385264	3.98191e-11	0.734359	0.75824	0.467724	0.941616	1.72612	0.619324	0.635009	1.29122	8.03642	8.06594	7.06397	8.71861	15.7866	7.9183	8.0178	13.1617	5.50232	5.10309
chrX:9810173-9822215:-	dpy-22	F47A4.2	WBGene00001081	3.09622e-05	0.0698179	0.505401	3.98025e-07	9.44364e-17	0.439421	0.532617	0.432034	0.44044	0.224003	0.130402	0.522967	0.803761	0.177429	-0.122636	0.173979	11.3149	9.57373	10.9698	11.2069	13.9963	11.3404	9.14086	11.3119	11.1338	9.01586
chrX:4389340-4393770:+	dpy-23	R160.1	WBGene00001082	1.47975e-06	0.13276	0.322258	0.271616	0.0372297	0.431638	0.911985	0.843675	0.628481	0.245338	-0.217598	0.185157	0.295331	-0.220556	-0.0363232	0.0770952	23.0972	17.3113	13.1348	15.6832	17.3832	13.1088	15.0274	16.3179	17.2066	15.9992
chrIV:12445959-12451271:-	dpy-26	C25G4.5	WBGene00001085	0.00939237	0.119376	0.0107056	0.000246701	0.570446	0.848039	0.971745	0.898886	0.213192	0.143508	-0.293981	0.284571	0.0593411	0.0530688	0.00800043	0.0339353	63.3411	59.5419	46.0911	62.2079	54.3816	58.924	57.0828	58.1377	63.3117	59.4119
chrIII:3813535-3819661:-	dpy-27	R13G10.1	WBGene00001086	0.0135112	0.0118811	0.851636	3.48472e-06	0.00660628	0.744293	6.58146e-09	0.986509	0.255404	0.263072	0.0437886	0.435647	0.264846	0.0956825	0.70377	0.00750572	17.8358	17.6994	15.9603	18.9262	17.1699	16.548	25.5757	15.5425	17.2468	16.2202
chrIII:10763048-10777243:+	dpy-28	Y39A1B.3	WBGene00001087	0.00920752	0.00329355	0.329114	0.0116709	0.00780344	0.636195	0.942542	0.830134	0.239642	0.267858	-0.155904	0.232154	0.235034	0.115262	-0.0182657	0.0610242	37.524	37.7776	29.7217	34.8493	35.7704	36.0616	32.7921	34.6935	37.0541	34.5287
chrV:12191296-12192192:+	dpy-30	ZK863.6	WBGene00001088	0.461724	0.896875	0.372712	0.906369	0.00213975	0.96788	0.157721	0.536706	-0.0935683	0.0223637	-0.124857	0.0193075	-0.288647	0.0146841	-0.178407	-0.11283	138.974	148.77	114.813	140.559	115.805	126.662	110.533	115.795	139.886	161.703
chrV:6533598-6538045:-	dre-1	K04A8.6	WBGene00001089	2.64172e-05	0.458719	1.89544e-07	0.751018	0.421217	0.61011	0.957132	0.908848	0.469537	0.118356	0.614123	-0.0556873	0.114418	-0.123397	-0.0135307	-0.0362106	19.7612	15.1977	22.8102	12.7197	14.6818	13.484	14.5844	14.3444	16.4221	15.413
chrIV:6607366-6613342:-	drh-1	F15B10.2	WBGene00001090	0.392052	0.864571	0.212703	0.992748	0.0230053	0.782224	0.943866	0.792421	-0.104476	-0.0283784	-0.179901	0.00245522	-0.219608	0.077186	-0.0170029	-0.0682885	29.2001	30.4186	25.5079	29.4098	25.7483	30.6185	28.6564	27.6225	32.3507	34.2439
chrIII:13342583-13343236:+	dro-1	F53A2.5	WBGene00001092	0.879507	0.871367	0.208775	0.294856	0.163976	0.746748	0.777808	0.64694	0.0332226	0.036691	-0.259685	0.162379	-0.19665	0.122898	-0.0800367	-0.147088	81.0158	80.0947	59.5387	83.0066	65.7313	78.8403	67.9758	64.714	80.4036	86.1813
chrIV:5538481-5541356:+	drp-1	T12E12.4	WBGene00001093	0.0214633	0.610564	0.0186352	3.24083e-06	0.563976	0.326936	0.698505	0.899803	0.190549	0.0592311	-0.241515	0.346823	0.0595237	0.140786	-0.0574271	0.0295584	89.1604	80.2676	70.233	92.9221	77.7737	91.959	79.9748	85.0293	92.8928	84.9693
chrIII:9489078-9491152:-	dars-1	B0464.1	WBGene00001094	0.00325009	0.0105688	0.369663	0.0328719	0.000116828	0.99127	0.199195	0.409357	-0.240099	-0.215742	-0.125313	-0.182167	-0.294114	0.00451883	-0.164613	-0.137343	182.933	183.63	174.38	178.001	168.465	191.146	169.608	172.897	212.545	235.835
chrV:12048726-12052163:+	dars-2	F10C2.6	WBGene00001095	0.51756	0.655444	0.302624	0.244267	0.313431	0.586445	0.332588	0.587171	0.105717	-0.0820773	-0.194405	0.166792	-0.142449	0.149986	-0.18469	-0.144129	27.1943	23.4953	21.5411	26.5292	21.7898	27.6383	21.6891	22.3497	27.6628	27.4706
chrX:15031368-15034471:-	dsc-1	C18B12.3	WBGene00001096	NA	NA	NA	NA	NA	NA	NA	NA	-0.0513264	-0.0947408	0.066605	0.0436991	-0.048425	0.0311326	-0.0488473	-0.0137047	0.0645142	0.0346663	0.117298	0.120191	0.0649325	0.0946078	0.0320319	0.0581382	0.0754865	0.108034
chrIV:315053-320576:-	dsc-4	K02D7.4	WBGene00001099	1.47671e-07	0.355082	2.14849e-09	0.000606176	1.32153e-13	0.254815	0.45277	0.618239	0.516527	-0.128885	0.799473	0.35626	0.685629	-0.238452	-0.147385	-0.133118	29.4589	18.4034	40.8688	24.572	31.7369	19.3533	20.6642	20.8674	25.6317	22.2552
chrII:5214430-5225361:-	dsh-1	C34F11.9	WBGene00001101	0.753989	0.652663	0.566402	0.7764	0.865889	0.907324	0.687382	0.959485	0.0674682	-0.0971009	0.136414	0.0607323	0.0375911	0.0549028	-0.103245	0.0235259	6.87994	6.03103	6.6347	6.3924	6.43848	6.24416	5.56983	6.10812	6.69816	7.13864
chrII:5078202-5081153:-	dsh-2	C27A2.6	WBGene00001102	0.0198214	8.3102e-05	0.0583211	1.94352e-06	0.325285	0.307343	0.569867	0.729842	0.221275	0.348307	-0.301656	0.406101	0.104454	0.216504	0.115839	0.0996333	53.1836	57.3755	38.5912	56.5876	46.8428	56.0452	52.1321	51.5207	53.4973	49.5696
chrIV:1207255-1208068:-	dsl-1	W09G12.4	WBGene00001103	0.434986	0.0212929	0.797552	0.000420225	0.903813	0.234382	0.834493	0.501707	0.342237	0.821469	-0.160729	1.15093	-0.0667018	0.62561	0.133943	0.414591	2.73068	4.26726	0.677345	5.44358	1.72827	2.43431	1.19248	1.83355	1.03832	2.06697
chrIV:1202647-1204970:-	dsl-2	W09G12.1	WBGene00001104	0.000566219	5.75797e-10	0.567928	1.62115e-10	0.751285	0.0128743	0.0458935	0.523354	0.856568	1.43086	-0.285052	1.46349	-0.118045	0.953221	0.746371	0.368467	10.6232	16.4516	2.45051	15.9933	4.63476	8.23143	6.83726	4.76635	3.68184	5.76773
chrIV:1610418-1612914:+	dsl-3	Y41D4B.10	WBGene00001105	4.3152e-17	4.57019e-05	6.05312e-09	3.63328e-14	1.24313e-06	0.989886	0.0297261	0.193827	2.30718	1.25248	1.88286	2.11201	1.39141	0.016963	0.837956	0.615331	8.79707	3.5999	4.58229	7.03448	3.94465	0.636505	1.73106	1.3616	0.623577	1.03535
chrX:14090320-14095421:+	dsl-4	F16B12.2	WBGene00001106	NA	NA	NA	NA	NA	NA	NA	NA	-0.00147543	0.00208431	0	-0.0433376	-0.0155193	0.033267	0	0.030634	0.024116	0.0258918	0	0	0.0154821	0.0235537	0	0.0209035	0	0.027486
chrIV:11619453-11620915:-	dsl-5	F58B3.8	WBGene00001107	NA	NA	0.863713	NA	NA	NA	0.000210376	NA	-0.0032912	0.141889	0.0922326	-0.00059774	-0.0759323	0.066047	1.1097	0.0930886	0.0661053	0.173777	0.144042	0.0634035	0.0226691	0.125425	1.47469	0.145749	0.0774241	0.0742761
chrIV:11396766-11398295:-	dsl-6	H02I12.4	WBGene00001108	NA	NA	NA	NA	NA	NA	NA	NA	0.178418	0.101317	0.0624585	0.181959	0.282202	0.0315879	0.0703044	0.0295824	0.124296	0.0667571	0.05647	0.119041	0.187561	0.0303644	0.0642862	0.0269479	0	0
chrV:12993165-12994607:+	dsl-7	F15B9.9	WBGene00001109	NA	NA	0.0482988	0.99499	0.680168	0.705598	0.904927	NA	-0.210061	-0.0237895	0.779625	-0.00592073	0.193411	0.285576	0.0801889	0.0885826	0.133767	0.235022	1.0113	0.23134	0.355112	0.459133	0.290512	0.30052	0.258406	0.2756
chrV:11554619-11558108:+	duo-1	F38B7.5	WBGene00001110	0.941266	0.816975	0.154503	0.893036	0.0769935	0.657463	0.129844	0.998586	-0.0135242	0.0402877	-0.210641	0.0234003	-0.195774	0.110818	-0.220798	-0.00136088	33.2587	34.1279	25.0629	31.8669	27.9555	31.5404	24.8879	29.1002	32.5021	36.5739
chrI:10464319-10471047:-	duo-3	Y106G6H.12	WBGene00001112	0.938568	0.697638	0.0308418	0.928792	0.00628654	0.580271	0.733436	0.721791	0.0137986	-0.0589934	-0.275088	0.0154943	-0.268247	0.119298	-0.0636759	0.0831689	49.3634	46.3359	34.0753	46.1457	38.6782	45.1096	39.609	43.9693	46.2308	53.2535
chrIV:9921940-9928202:-	dur-1	F25H8.5	WBGene00001113	0.788498	0.278494	0.669036	0.286733	0.935654	0.94886	0.981034	0.42407	-0.0885734	-0.290761	0.147411	-0.275166	0.0283768	-0.0481145	0.0111273	-0.285141	3.19307	2.69716	4.20355	2.58165	3.33423	3.61714	3.78201	3.01243	4.18367	3.72098
chrI:1483085-1491282:+	dyb-1	F47G6.1	WBGene00001115	1.79518e-10	6.72658e-05	4.97971e-14	1.95734e-18	4.50492e-17	0.972228	0.65524	0.0117651	1.19793	0.811341	1.466	1.58755	1.49456	-0.0274911	0.151422	0.604487	5.45708	4.03111	7.76244	6.80143	6.49068	2.49038	2.86487	4.06244	2.83546	2.36832
chrX:14049466-14063806:+	dyc-1	C33G3.1	WBGene00001116	0.635196	0.832867	0.00744354	0.950051	0.00766006	0.263625	0.0906816	0.309449	0.165744	0.0875501	0.712793	-0.0277683	0.631391	0.412175	0.490111	0.377045	1.93093	1.79121	2.56819	1.54759	2.64997	2.02403	2.15855	1.97432	1.62027	1.84372
chrI:4989556-4994662:-	dyf-1	F54C1.5	WBGene00001117	0.647756	0.781706	0.961283	0.964278	0.848924	0.822228	0.420977	0.915072	0.227919	0.1571	0.037063	-0.0275589	0.103902	-0.201594	0.383038	0.0960958	0.803955	0.738363	0.753283	0.57132	0.675084	0.581186	1.0775	0.799903	0.805663	0.688075
chrIII:13674780-13686344:-	dyf-2	ZK520.3	WBGene00001118	0.93179	0.140546	0.845155	0.713556	0.874412	0.929178	0.921908	0.894019	-0.0435635	0.484875	-0.111609	0.151337	0.0714397	-0.0848002	-0.0614744	0.104326	0.853411	1.31486	0.992996	0.943151	0.90227	1.02308	1.04147	1.20796	1.22939	0.964543
chrIV:3396578-3399120:-	dyf-3	C04C3.5	WBGene00001119	0.000177347	2.31771e-21	0.780471	0.000812116	2.19317e-06	0.0951648	0.0211919	0.000702202	0.939142	2.10901	-0.157279	0.853295	-1.24295	-0.721671	0.82286	-1.19875	5.48897	13.2276	2.16507	4.78633	0.768178	1.23383	5.27151	0.66849	2.80271	2.78201
chrI:9359065-9364172:+	dyf-5	M04C9.5	WBGene00001121	0.91502	0.371172	0.926583	0.666376	0.702877	0.968531	0.978568	0.960071	-0.0664585	-0.424153	0.0694783	-0.222658	-0.197461	0.0512438	0.0214265	0.0524063	0.682096	0.411888	0.644579	0.521067	0.552217	0.635333	0.60627	0.631797	0.655294	0.807733
chrX:10379640-10386448:-	dyf-6	F46F6.4	WBGene00001122	0.363578	0.849977	0.725016	0.499124	0.877362	0.772868	0.666902	0.859219	-0.417718	-0.11845	-0.211882	-0.323532	-0.0913021	-0.250507	-0.243875	-0.155115	0.30328	0.467201	0.567415	0.329344	0.466843	0.546214	0.545764	0.612615	0.827027	0.603478
chrX:9698620-9701542:+	dyf-7	C43C3.3	WBGene00001123	0.633437	0.760816	0.913803	0.995691	0.948415	0.636973	0.804496	0.217699	0.244451	0.17541	0.0780061	-0.00561825	-0.0398848	-0.344945	-0.156854	-0.622941	0.980348	0.8986	1.07465	0.684966	0.677842	0.63844	0.817294	0.430077	1.1015	0.804102
chrX:763768-766732:+	dyf-11	C02H7.1	WBGene00001127	NA	NA	0.805435	0.959245	0.826706	0.973742	0.201213	NA	0.383098	0.532916	0.151735	0.0305213	0.113758	0.042124	0.552855	-0.135508	0.384292	0.497877	0.363532	0.152878	0.206856	0.299664	0.688234	0.195375	0.298696	0.162262
chrII:7168776-7171314:-	dyf-13	C27H5.7	WBGene00001129	0.148682	0.187822	0.811208	0.0553619	0.598499	NA	0.953447	NA	-0.587786	-0.556287	0.146958	-0.727786	-0.251809	0.0896731	0.0406368	-0.135971	0.203405	0.214495	0.357665	0.131743	0.362271	0.320699	0.291117	0.195736	0.298851	0.610728
chrX:15568848-15573625:+	dyn-1	C02C6.1	WBGene00001130	6.83074e-19	3.40878e-09	0.997621	9.99522e-05	7.94672e-07	0.988482	0.014439	0.739205	0.8681	0.607411	0.000935228	0.416793	0.499668	0.00723413	0.343838	0.0909418	34.0201	27.9219	19.6506	23.0722	25.0528	19.7242	25.1096	20.9436	21.8911	20.0104
chrI:11526909-11557783:-	dys-1	F15D3.1	WBGene00001131	0.00064421	0.00977352	0.00855883	0.00509516	1.323e-25	0.746665	0.97698	0.233764	0.395743	0.317713	0.488267	0.3337	1.05982	0.128075	-0.0108259	0.287886	6.72249	6.27239	9.60782	6.01011	10.2993	7.3679	6.65278	8.28734	7.47719	5.52161
chrIV:8852487-8862474:+	alp-1	T11B7.4	WBGene00001132	0.0160958	3.19762e-05	0.106923	0.0019892	0.0133478	0.48349	0.0422359	0.000282473	-0.249433	-0.403993	-0.202421	-0.307413	-0.244922	-0.130479	-0.244054	-0.401133	23.4233	20.7284	25.6725	21.0247	22.4739	27.0177	24.9183	22.2973	33.0462	30.4324
chrII:14166807-14171573:-	eat-2	Y48B6A.4	WBGene00001133	0.269682	0.44345	0.035063	0.802093	0.648648	0.797672	0.850203	0.892937	0.487569	0.374472	0.85958	-0.140051	0.227768	-0.2318	0.125427	0.123811	0.988959	0.858988	1.4269	0.408843	0.694482	0.361624	0.608414	0.608476	0.567847	0.585313
chrII:9324815-9329605:+	eat-3	D2013.5	WBGene00001134	0.243891	0.612395	0.0709075	0.00215392	0.298609	0.0340899	0.745012	0.752348	0.133449	0.0708722	-0.185449	0.291387	0.115329	0.226209	0.0476705	0.0594909	60.6001	57.274	51.4099	63.2346	57.2147	68.6627	60.5693	61.0765	65.3322	60.0854
chrIII:9136839-9141745:+	eat-4	ZK512.6	WBGene00001135	0.834259	0.910008	0.799845	0.328225	0.334659	0.893749	0.781991	0.6275	-0.102152	-0.0599137	0.128323	-0.361855	-0.341367	-0.110602	0.13765	-0.270912	1.8412	1.88921	2.23617	1.3708	1.42693	1.82996	2.25869	1.58563	2.2385	2.19254
chrI:7308601-7311937:-	eat-5	F13G3.8	WBGene00001136	0.833782	0.964356	0.644982	0.120168	0.447019	0.930349	0.509161	0.895025	-0.118663	-0.0297958	0.25463	-0.611726	0.324655	-0.0960912	0.332227	-0.117913	1.19444	1.29716	1.33366	0.630579	1.77277	0.903072	1.44881	0.882193	1.12721	1.47643
chrV:13126392-13129980:-	eat-6	B0365.3	WBGene00001137	0.159335	0.0418306	0.0638579	0.00196788	0.000120731	0.905343	0.508934	0.835298	0.128836	0.17564	0.171477	0.244328	0.288708	0.0281008	0.0754106	-0.0395871	377.557	384.875	442.963	382.547	403.817	400.552	414.084	381.973	438.053	375.722
chrI:9722541-9726254:+	eat-16	C16C2.2	WBGene00001145	0.999557	0.0911484	0.65688	0.351995	0.405166	0.757579	0.0415905	0.906417	0.000219497	-0.30907	0.118844	-0.183488	0.157836	-0.123132	-0.398134	-0.0511548	10.0163	7.88935	11.071	8.19693	10.7343	9.26327	7.55908	9.76932	11.3236	10.9102
chrI:14391995-14395229:+	eat-18	Y105E8A.7	WBGene00001147	NA	NA	NA	NA	NA	NA	NA	NA	0.0864699	0.047048	0.0192398	-0.0471485	0.172339	0.0857555	0.0328303	-0.0463763	0.142602	0.0983016	0.126558	0	0.21982	0.213564	0.147532	0.0412291	0.113727	0.0524672
chrX:15516587-15523932:+	eat-20	H30A04.1	WBGene00001148	0.418067	0.413058	0.551848	0.159875	0.037119	0.620933	0.733758	0.999644	0.177285	0.184702	-0.165086	0.272568	0.357226	0.181338	-0.105395	-0.000672013	6.18504	6.14115	4.94238	6.19369	6.74487	6.37877	5.15813	5.57526	6.22245	5.91169
chrX:12877410-12880255:+	bcat-1	K02A4.1	WBGene00001149	8.24169e-07	0.000130485	0.893061	2.59259e-06	0.105682	0.269504	9.22082e-05	0.038767	-0.379268	-0.306521	-0.0260175	-0.363218	-0.140367	-0.165707	-0.39834	-0.245627	123.902	128.738	151.332	117.076	140.118	137.102	116.311	129.557	171.918	176.114
chrV:15357679-15360721:-	ech-1	C29F3.1	WBGene00001150	0.0304201	7.00413e-09	0.568489	0.0950848	0.0118117	0.125435	2.63546e-08	0.107211	0.564183	1.29971	0.247091	0.454561	0.609188	0.589256	1.52582	0.590041	3.55941	6.21488	1.85847	3.04684	3.52608	2.50137	5.41352	2.49643	1.65222	2.46238
chrIV:11854956-11856353:-	ech-2	F38H4.8	WBGene00001151	0.128882	0.484333	0.0561178	0.945617	0.0520612	0.686032	0.114517	0.0151031	-0.230662	-0.127362	-0.320052	-0.0161666	-0.264925	-0.124338	-0.273337	-0.403918	30.9626	32.9406	29.0007	33.7586	28.8953	33.3317	29.9888	27.289	40.7663	39.7965
chrV:8022274-8023288:+	ech-3	F43H9.1	WBGene00001152	0.683808	0.883975	0.967702	0.83574	0.89771	0.998969	0.715072	0.880537	-0.126116	-0.0549883	0.0201325	-0.069234	0.0435888	-0.00229732	0.133964	-0.0846301	10.1202	10.5511	10.3112	9.88395	11.0103	10.0889	11.2558	9.4984	11.3114	12.1336
chrII:10820972-10822635:+	ech-4	R06F6.9	WBGene00001153	0.905393	0.288763	0.167215	0.170016	0.042143	0.864092	0.944289	0.47719	0.0191527	-0.124922	-0.202014	-0.148275	-0.195525	0.055063	-0.0175032	0.142768	86.2442	76.8941	66.2516	71.6215	70.897	79.6045	75.575	84.6957	85.3489	92.679
chrIV:797023-799855:+	ech-5	F56B3.5	WBGene00001154	0.0119633	0.018227	0.00110042	0.143637	0.114769	0.567264	0.309215	0.749654	-0.29656	-0.2853	-0.45784	-0.188495	-0.191385	-0.143843	-0.176027	-0.090698	57.229	56.8999	49.7275	57.7577	58.9898	62.3183	60.9068	64.7377	77.0893	76.9752
chrIII:9751355-9752837:-	ech-6	T05G5.6	WBGene00001155	7.34502e-14	0.00203068	9.94948e-11	0.0158773	1.94897e-20	1.24935e-09	3.52543e-09	0.0237641	-0.593458	-0.272958	-0.560241	-0.218609	-0.718264	-0.536302	-0.517091	-0.237838	492.003	608.122	499.592	598.705	431.059	508.048	515.017	626.976	826.806	813.533
chrI:14367566-14369760:-	ech-7	Y105E8A.4	WBGene00001156	0.00310073	0.0429685	0.00163394	0.0229605	0.0139631	0.00063832	9.26619e-08	6.6177e-07	-0.35853	-0.265394	-0.455155	0.28113	0.289333	-0.502307	-0.718263	-0.672741	70.6394	74.4516	72.1914	104.213	107.162	69.7644	59.7639	61.7529	111.76	99.3552
chrIV:10236607-10239092:-	ech-8	F01G10.2	WBGene00001157	0.667629	0.649913	0.774118	0.686989	0.187715	0.340506	0.0669824	0.381506	0.140186	0.153922	0.107344	0.130377	0.326446	0.325774	0.456731	0.298673	8.33764	8.3345	8.39749	7.70515	9.19844	9.92888	10.978	9.72792	8.62455	8.14224
chrIV:10233298-10235307:-	ech-9	F01G10.3	WBGene00001158	1.54115e-08	0.808636	6.09113e-40	1.00414e-06	0.00143283	0.242244	0.501997	0.0053831	1.88042	-0.145181	3.63061	1.65361	1.1123	0.558422	0.315748	0.98225	2.15	0.119345	11.6286	1.62157	0.963048	0.898822	0.669014	1.3473	0.487559	0.211732
chrII:8346644-8350499:+	eff-1	C26D10.5	WBGene00001159	0.957514	0.49749	0.216186	0.322967	0.855446	0.724915	0.338228	0.959547	-0.0271305	-0.27054	0.43881	-0.349185	0.080723	0.226796	0.359402	0.0419949	1.91022	1.52715	2.44143	1.35582	1.9949	2.03831	2.28825	1.74621	1.87138	2.13004
chrIII:6164867-6168495:-	efk-1	F42A10.4	WBGene00001160	0.755598	0.567798	0.173384	0.455408	0.506386	0.18519	0.347925	0.458205	0.0439253	-0.0764991	-0.177834	0.0895228	-0.078951	0.197362	0.131843	0.131087	66.0691	59.9324	51.5384	63.7053	57.9362	67.2405	64.2078	64.1678	65.2312	69.7714
chrV:16958566-16965657:-	efl-1	Y102A5C.18	WBGene00001161	0.134116	0.377161	0.0282858	0.114311	0.924945	0.974421	0.137639	0.832943	0.193712	0.130827	-0.351219	0.199826	-0.0175014	-0.0167607	-0.255014	-0.0706209	43.6044	41.1667	26.7324	40.8936	35.8904	33.9813	28.6469	32.731	38.4226	41.3975
chrII:13406090-13411210:+	efl-2	Y48C3A.17	WBGene00001162	0.0184292	0.277321	0.848433	0.142828	0.245872	0.780674	0.45275	0.936139	0.372715	0.206873	-0.067756	0.252596	0.198511	0.128762	0.199469	-0.0412759	18.4027	16.1108	13.0011	15.7448	15.5109	15.0415	15.8885	13.2607	15.2598	15.293
chrIV:10576330-10578266:+	efn-2	C43F9.8	WBGene00001163	0.970333	0.584739	0.895481	0.0953807	0.156498	0.872834	0.604099	0.611315	0.018419	-0.209872	-0.0650257	-0.494949	-0.410278	-0.110783	-0.200211	-0.243813	7.38473	6.05795	6.91896	4.53333	4.97539	6.67418	6.20831	6.00042	8.14275	7.92536
chrX:13476033-13477388:-	efn-3	F15A2.5	WBGene00001164	0.118087	0.274318	0.307496	0.159441	0.067624	0.997284	0.808759	0.680307	-0.518752	-0.397387	-0.424094	-0.470081	-0.554155	0.00544954	-0.134629	-0.260962	5.33932	5.86835	3.563	5.22187	4.96718	5.2989	4.68508	4.16816	5.91432	9.07993
chrIV:559238-568076:+	efn-4	F56A11.3	WBGene00001165	0.354285	0.451481	0.00373732	0.128297	0.33233	0.905774	0.966123	0.703833	-0.277858	0.237928	-0.741518	0.398391	-0.26885	0.0801741	-0.0212271	0.178157	5.3297	7.9053	3.94848	8.47351	5.15145	7.54883	6.99378	8.15641	7.93385	7.24106
chrIII:6009513-6012790:+	eftu-2	ZK328.2	WBGene00001166	0.198664	0.253993	0.78725	0.325426	3.25534e-06	0.747513	0.000939452	0.876542	-0.122891	-0.114018	-0.05157	-0.0972931	-0.351031	-0.0820772	-0.378991	0.0421726	120.519	119.655	105.619	114.657	98.2047	103.346	83.7166	112.881	122.205	143.109
chrI:9163524-9166945:+	eef-2	F25H5.4	WBGene00001167	0.415061	0.881394	0.996842	0.244373	0.803578	0.578035	0.895089	0.840667	-0.0826248	-0.0208928	0.000911319	0.108761	0.0296567	0.094993	-0.022624	-0.042561	1754.29	1806.37	1863.53	1874.41	1815.33	1991.13	1832.92	1807.37	2077.23	2025.03
chrIII:6969971-6971948:-	eef-1A.1	F31E3.5	WBGene00001168	0.207794	0.356621	0.796256	0.999199	0.00119796	0.290099	0.105129	0.543876	-0.123851	-0.0988736	-0.0428053	0.000287602	-0.261392	0.152697	0.180574	0.102124	6071.95	6092.05	5159.4	6189.68	5270.01	5922.14	6039.79	5714.66	5931.13	7215.39
chrX:7823601-7825718:+	eef-1A.2	R03G5.1	WBGene00001169	2.88656e-12	1.65947e-05	3.58156e-08	0.126331	3.7434e-09	0.988482	0.737991	0.298573	0.521069	0.341613	0.521091	0.141099	0.439592	-0.00565763	0.0542142	-0.151053	420.892	365.943	412.589	301.163	380.091	284.421	296.734	256.671	318.524	317.985
chrV:14431295-14432344:-	egl-1	F23B12.9	WBGene00001170	0.184636	0.0948624	0.935756	0.224434	0.834696	0.912183	0.00016858	NA	0.565517	0.690675	-0.0613828	0.520297	0.118745	-0.119558	1.39035	-0.0590243	2.05506	2.39783	0.894596	1.80933	1.01325	0.809752	5.63367	0.904606	1.10915	0.874817
chrV:1289373-1299332:-	egl-2	F16B3.1	WBGene00001171	0.533963	0.990344	0.6269	0.660182	0.541796	0.53786	0.923452	0.629758	0.24493	-0.00653813	0.209213	-0.182395	0.226631	-0.320184	-0.0547572	-0.261515	1.44532	1.15048	1.73214	0.930548	1.35776	1.1105	1.3879	1.16192	1.62121	1.2778
chrV:10169151-10173727:-	egl-3	C51E3.7	WBGene00001172	0.295543	0.803456	0.370186	0.615348	0.000166757	0.612949	0.603357	0.274937	0.214247	0.0682958	0.202947	-0.116003	0.592059	0.167401	0.131546	0.267315	21.753	19.2933	24.6737	15.998	27.4097	24.0291	23.406	25.8456	23.6954	20.2477
chrIV:1847967-1880591:+	egl-4	F55A8.2	WBGene00001173	0.0153329	0.0109465	0.545469	0.00110813	1.1129e-09	0.251836	0.0902482	0.000114784	0.272342	0.28692	0.0902261	0.348261	0.594098	0.171298	0.199636	0.398753	69.0751	68.878	70.4305	68.0818	82.9533	74.5471	76.0831	87.5744	73.6844	62.0347
chrIII:7814317-7817062:+	egl-5	C08C3.1	WBGene00001174	0.677406	0.908196	0.876085	0.696163	0.691307	0.852065	0.529223	0.906116	0.21585	0.0728405	0.104918	0.201437	0.199932	0.175178	0.322085	0.10709	0.979215	0.82064	0.970786	0.903156	0.91755	1.05302	1.23644	0.976483	0.959204	0.830336
chrX:5931087-5934649:+	egl-6	C46F4.1	WBGene00001175	0.217814	0.105151	0.0149591	0.680803	0.00133754	0.00348165	0.588847	0.0508271	-0.375539	0.461062	-0.707017	-0.149224	-0.796813	-0.861358	-0.209549	-0.616528	3.3805	6.51178	3.28907	3.79707	2.29124	2.90219	4.95206	3.54944	6.53638	4.99528
chrV:20825-43971:+	egl-8	B0348.4	WBGene00001177	0.00643529	0.654124	7.75871e-05	0.552729	2.21826e-05	0.569604	0.891512	0.688893	0.312022	0.0758426	0.445705	0.0892115	0.442181	-0.120477	-0.0295188	0.0897283	21.0492	17.5569	26.6718	16.7908	22.0812	17.8431	19.0352	20.7132	21.6748	18.3728
chrV:10468388-10476929:+	egl-9	F22E12.4	WBGene00001178	0.231193	0.000861569	0.305808	0.00745195	0.000646253	0.415504	0.137299	0.640618	-0.179418	-0.423927	0.173391	-0.345134	-0.408552	-0.177373	-0.235503	-0.118696	15.8266	13.1074	18.637	13.1429	12.8466	14.5079	13.9058	15.1282	18.3664	19.5934
chrV:12454502-12462989:-	egl-10	F28C1.2	WBGene00001179	0.64709	0.496639	0.391688	0.566621	0.0997699	0.909292	0.494122	0.830815	0.0991458	0.14188	0.177893	-0.118009	0.26044	0.0515163	0.148214	-0.0772381	7.79037	7.93512	8.4908	6.22097	8.3687	7.74216	8.31385	7.05719	8.32725	7.89787
chrX:5663802-5674025:+	egl-13	T22B7.1	WBGene00001182	0.899082	0.401301	0.0122861	0.0549401	0.889389	0.297192	0.482357	0.0232552	-0.0496678	-0.253221	0.638193	-0.479221	0.0502738	-0.380407	-0.236646	-0.634354	4.08964	3.446	6.4821	2.72048	4.21878	2.9098	3.27526	2.37949	4.40708	4.62722
chrX:11016344-11023329:+	egl-15	F58A3.2	WBGene00001184	0.00369521	0.395505	0.961685	0.0929471	0.377176	0.48141	0.491187	0.672834	-0.55792	-0.208471	0.01983	-0.348729	-0.194839	-0.233847	-0.185211	-0.158498	2.41155	3.09329	4.46724	2.64275	3.02711	3.6982	3.83474	3.91418	4.9134	3.98683
chrX:489696-492274:+	egl-17	F38G1.2	WBGene00001185	NA	NA	0.858465	0.767858	0.269165	NA	0.524652	NA	-0.0800908	0.078186	0.106633	-0.140447	-0.411063	-0.0669813	0.293838	-0.374947	0.416824	0.595829	0.564072	0.332993	0.125035	0.361558	0.837727	0.0683267	0.488941	0.551114
chrIV:1902323-1917614:+	egl-18	F55A8.1	WBGene00001186	0.000503764	0.0604856	0.272608	0.000104426	0.0467945	0.804807	0.947197	0.987759	0.62351	0.384108	-0.343989	0.681851	0.372315	0.149201	-0.0336418	-0.0129532	13.6245	11.2664	6.34612	13.2964	10.8256	9.39065	8.12361	8.25118	9.30237	9.33941
chrIV:7405449-7418722:+	egl-19	C48A7.1	WBGene00001187	0.955393	0.82763	0.367304	0.689034	0.000123713	0.801587	0.489615	0.163204	0.0147791	0.0550139	0.182408	-0.0868571	0.538977	0.0943367	0.14691	0.278859	6.05096	6.15186	7.51998	5.26257	8.45366	7.04465	7.32514	8.0564	7.34292	6.5199
chrIV:9812424-9815506:-	egl-20	W08D2.1	WBGene00001188	0.81317	0.343892	0.985547	0.157973	0.314692	0.547678	0.584086	0.647717	-0.100849	-0.329933	0.0118003	-0.439	-0.314727	-0.310794	-0.22817	-0.247981	3.14846	2.57117	3.01388	2.21194	2.52379	2.28942	2.4614	2.42615	3.3315	3.72553
chrIV:10478422-10481824:-	egl-21	F01D4.4	WBGene00001189	0.434777	0.567798	0.76754	0.00636362	0.978517	0.807312	0.709293	0.912899	-0.15427	-0.124991	0.0811595	-0.426559	0.00732634	-0.0984033	-0.0973635	-0.0456186	28.4714	28.6937	31.0588	21.8827	30.6046	27.2354	27.261	28.2916	32.638	34.6918
chrIV:13989069-14012049:+	egl-23	Y37A1B.11	WBGene00001190	0.0098875	0.639242	0.42101	0.319635	0.939321	0.507364	0.953351	0.403205	-0.72569	-0.185984	-0.306739	-0.324669	0.0332083	-0.327599	-0.0325405	-0.369158	1.41995	2.2138	2.54709	1.8728	2.55675	2.48787	3.19664	2.41407	3.66108	2.84502
chrII:69660-71279:+	egl-26	C23H3.1	WBGene00001193	0.542108	0.163611	0.353475	0.119386	0.160857	0.954264	0.0432136	0.721585	0.158033	-0.320714	-0.268136	0.32833	0.28691	0.0420314	-0.5001	-0.15872	11.9635	8.23554	8.75127	12.7134	12.5795	11.0953	7.31261	9.53913	12.0137	11.5788
chrII:6835038-6847865:+	egl-27	C04A2.3	WBGene00001194	0.00215381	0.00421091	0.932997	0.00986099	0.830598	0.257313	0.22616	0.615387	0.251066	0.239356	0.0180532	0.21608	0.0269742	0.173189	0.156226	0.0975952	57.2607	56.0665	46.2434	52.1756	46.7874	51.5968	50.9918	48.9153	50.9214	52.2949
chrI:1835681-1841923:+	egl-30	M01D7.7	WBGene00001196	0.115348	0.087391	0.220507	0.00097517	0.975546	0.814115	0.00604998	0.0160157	-0.20087	-0.218359	-0.21963	-0.369842	0.0061203	0.0849192	-0.422699	0.389345	26.2954	25.6504	26.5593	21.8048	29.1235	33.0762	22.9244	41.1892	34.7127	33.0322
chrX:10734261-10744275:+	egl-36	R07A4.1	WBGene00001202	0.224208	0.200935	0.677011	0.0824682	0.202898	0.822598	0.568367	0.543975	-0.417528	-0.4454	0.192626	-0.55355	-0.406398	-0.167718	-0.247822	-0.316167	2.06118	1.98721	2.97147	1.70516	1.9915	2.17931	2.03751	1.92177	2.82103	3.20098
chrIV:10107014-10110391:-	egl-38	C04G2.7	WBGene00001204	0.317942	0.944977	0.358892	0.99966	0.907252	0.908239	0.317465	NA	0.451966	0.0462338	0.447119	0.000363358	0.0701246	0.124169	0.472794	0.0110626	1.56437	0.894155	1.46141	0.793103	0.901572	0.913062	1.51425	0.771413	0.835868	0.917341
chrII:9955127-9962186:+	egl-43	R53.3	WBGene00001207	0.558629	0.811247	0.0691814	0.656868	0.980238	0.818715	0.027525	0.697669	0.227987	0.112063	0.622551	-0.180556	-0.0126538	-0.176369	0.726599	-0.237999	2.79631	2.50507	3.31368	1.8477	2.18293	1.64373	3.61733	1.54459	2.14302	2.51369
chrII:5933469-5940777:+	egl-44	F28B12.2	WBGene00001208	0.0108556	0.0357204	0.00306721	0.00994889	0.683358	0.974365	0.920771	0.0316094	0.359821	-0.322512	0.496241	-0.374325	0.077926	-0.0188746	0.0318973	0.396587	19.0169	11.4901	19.869	10.4684	14.8495	13.6504	14.1664	18.4855	15.4408	15.997
chrIII:7824311-7828560:-	egl-45	C27D11.1	WBGene00001209	0.980231	0.136742	0.647911	0.0762896	0.786098	0.405367	0.892331	0.905636	0.00326051	0.127905	-0.0646386	0.14287	0.029773	0.123992	-0.023602	0.027252	151.904	163.561	141.524	156.477	148.005	161.619	145.678	150.982	165.21	165.086
chrV:6679312-6681556:-	egl-46	K11G9.4	WBGene00001210	0.902506	0.901418	0.616192	0.655173	0.745327	NA	0.9313	NA	0.0737377	0.075984	0.250855	0.219852	-0.165737	-0.114617	0.0566293	-0.153532	0.465858	0.462499	0.511111	0.56083	0.272773	0.217575	0.342853	0.188362	0.329742	0.439194
chrV:9899563-9907620:+	egl-47	C50H2.2	WBGene00001211	0.998029	0.320459	0.824812	0.101813	0.776509	0.816807	0.548793	NA	0.00199495	-0.456606	-0.142971	-0.655773	-0.153084	-0.211856	-0.311752	-0.221711	0.532536	0.252973	0.446283	0.1529	0.40573	0.399965	0.329275	0.387769	0.622659	0.579641
chrI:7650414-7656332:-	ego-1	F26A3.3	WBGene00001214	0.843245	0.0192083	0.043003	0.0641767	0.335978	0.76689	0.0300512	0.921926	0.0262448	0.20045	-0.264723	0.162136	-0.0920214	0.0808468	-0.279384	-0.029639	61.3765	68.4926	47.5331	63.0573	54.0287	60.7832	47.0402	56.1856	64.0096	65.6374
chrI:11400603-11416411:-	ego-2	Y53H1C.2	WBGene00001215	5.02055e-07	2.33049e-07	0.213566	3.4306e-10	2.80445e-27	0.00214734	0.00964716	6.10477e-10	0.770519	0.797613	0.300632	0.940843	1.53104	0.652615	0.540269	1.13781	11.8879	11.959	12.0604	12.558	19.7522	15.6922	14.4338	22.5562	10.7177	7.35687
chrIV:5416897-5419186:-	ehn-3	ZK616.10	WBGene00001223	NA	NA	NA	NA	NA	NA	NA	NA	0	0	0	0.0657712	0	0.0601282	0	0	0	0	0	0.0396601	0	0.0383308	0	0	0	0
chrII:5820691-5824064:+	ehs-1	ZK1248.3	WBGene00001224	0.0084686	0.0249078	0.565025	0.00160552	1.7553e-06	0.0489436	0.0818265	0.235358	0.291464	0.259063	-0.100342	0.338183	0.471294	0.283089	0.235137	0.195283	29.3101	28.2614	25.882	28.2815	31.827	33.9755	32.8574	31.9319	30.9935	25.9603
chrII:14795328-14798158:+	eif-3.B	Y54E2A.11	WBGene00001225	0.278193	0.0167157	0.901778	0.00053355	0.000135458	0.0945423	0.0353824	0.0711799	0.133005	0.253968	0.0306623	0.341226	0.362605	0.27627	0.299077	0.280818	87.0717	93.5869	90.4509	94.195	97.9359	107.809	109.594	108.156	98.6859	86.3424
chrI:9976420-9979652:-	eif-3.C	T23D8.4	WBGene00001226	0.0403734	0.718797	0.132054	0.987194	0.0246901	0.705561	4.34641e-05	0.355362	-0.16374	-0.0413198	-0.157543	0.00274755	-0.169576	-0.0721497	-0.359878	-0.124489	179.312	192.837	175.849	188.224	170.811	186.736	152.517	179.977	219.124	219.061
chrIII:8969560-8971501:-	eif-3.D	R08D7.3	WBGene00001227	0.0373248	0.073123	0.122373	0.337676	2.85916e-05	0.549243	1.36147e-07	0.134899	-0.19468	-0.175215	-0.161245	-0.102446	-0.342448	-0.0971664	-0.452009	-0.170661	149.844	149.871	141.745	149.409	129.184	148.265	115.529	140.813	177.096	187.173
chrI:10640382-10642270:-	eif-3.E	B0511.10	WBGene00001228	0.082148	0.192368	0.948445	5.4569e-06	0.00792114	0.434523	0.67215	0.889332	0.189163	0.153277	0.0136744	0.421149	0.25685	0.129022	0.0651311	0.0344822	82.7516	79.5926	92.7857	91.0664	83.0026	100.642	96.2242	94.1667	102.489	78.8628
chrII:9331584-9333907:+	eif-3.F	D2013.7	WBGene00001229	0.168543	0.787597	0.437024	0.288711	1.05909e-05	0.819276	0.43626	0.858255	-0.139878	-0.0382708	-0.100372	-0.111805	-0.358984	-0.0538746	-0.0995029	-0.0398239	138.164	146.477	119.261	131.603	113.253	123.23	119.339	124.471	142.789	166.049
chrII:8442714-8444188:+	eif-3.G	F22B5.2	WBGene00001230	0.86923	0.716486	0.848526	0.186007	0.553545	0.969599	0.657145	0.748689	-0.0252435	0.0511003	-0.0342922	0.139141	-0.0700661	0.0130833	-0.0673002	-0.0666993	108.204	112.722	109.936	113.453	100.271	113.619	107.409	107.459	125.621	119.981
chrI:4444720-4446594:+	eif-3.H	C41D11.2	WBGene00001231	0.0692164	0.317061	0.749904	0.246464	0.00026625	0.868171	0.812738	0.606043	-0.186556	-0.118288	-0.0531793	-0.128048	-0.322186	0.0447199	-0.0413607	-0.0955358	78.2954	81.0875	73.6879	76.2263	68.0396	78.9323	74.303	71.5158	85.3346	97.2618
chrI:2485870-2489775:+	eif-3.I	Y74C10AR.1	WBGene00001232	0.56148	0.7474	0.835609	0.89863	0.382517	0.917093	0.559257	0.224969	-0.0771004	-0.0495052	-0.036417	0.0203691	-0.100981	-0.0299477	0.0822357	-0.164155	102.037	102.631	106.996	102.139	95.9382	107.514	116.335	97.7822	122.438	117.344
chrV:12953986-12955214:+	eif-3.K	T16G1.11	WBGene00001233	0.00175342	0.568493	0.104758	0.70481	1.13663e-06	0.91055	0.438744	0.334404	-0.311774	-0.0809465	-0.229321	-0.0541867	-0.444873	0.0397919	-0.127757	-0.175564	103.197	119.838	88.6148	115.642	89.8276	107.308	95.2703	92.0853	116.399	140.104
chrI:12968910-12970227:+	eif-6	C47B2.5	WBGene00001234	0.94044	0.187822	0.730632	0.0253761	0.00309861	0.571856	0.542769	0.2396	-0.014166	0.166755	0.0638929	0.247175	0.301153	0.118952	0.098499	0.185192	68.3907	76.7175	78.2402	76.8417	81.7414	81.3043	80.1732	85.2802	83.3798	75.2346
chrIII:11718736-11719352:-	elb-1	Y41C4A.10	WBGene00001235	0.0762965	0.278494	0.709101	0.230126	0.971273	0.677174	0.640427	0.900763	0.286768	0.198828	-0.0940546	0.207689	-0.00958762	0.133725	0.110271	0.0488277	65.3721	60.5196	43.4103	57.638	50.4715	51.2637	50.3974	48.1879	51.8763	57.884
chrIII:1415538-1417179:-	elc-1	Y82E9BR.15	WBGene00001236	0.359012	0.421525	0.32639	0.00308877	0.0145505	0.952672	0.760932	0.345308	0.154106	-0.145118	-0.199557	0.394113	0.322485	-0.0313129	-0.0792169	0.220803	78.13	62.1672	60.3261	86.6632	84.2813	68.2165	65.8819	81.907	77.8552	76.2163
chrX:1777302-1778141:-	elc-2	W03H1.2	WBGene00001237	NA	NA	0.997722	NA	NA	NA	NA	NA	0.0613264	0.0674344	-0.00147098	0.163315	0.101572	-0.0131563	-0.0487306	-0.157304	0.286375	0.29627	0.353563	0.463583	0.343508	0.344896	0.291631	0.152953	0.402175	0.189756
chrIV:9526342-9528335:+	elo-1	F56H11.4	WBGene00001239	0.0419179	0.458803	0.359757	0.296799	0.128905	0.254828	0.0233718	0.000111907	-0.202729	-0.0926196	-0.134635	-0.11653	-0.152163	-0.184961	-0.275618	-0.434933	247.758	264.11	242.151	245.997	245.476	233.66	219.109	195.704	297.166	311.296
chrIV:17466023-17467371:-	elo-2	F11E6.5	WBGene00001240	2.69328e-05	0.00198829	0.207104	0.201304	0.751579	2.84047e-05	2.55046e-12	8.58532e-13	-0.328678	-0.254678	-0.170395	-0.120814	0.0370639	-0.469278	-0.72119	-0.734759	193.997	201.781	217.766	209.718	239.779	176.193	147.336	145.94	274.111	266.134
chrIV:7237717-7239885:+	elo-3	D2024.3	WBGene00001241	0.817329	0.396463	0.291262	0.372092	0.0447132	0.974539	0.996931	0.12694	-0.0427905	-0.129573	-0.159712	0.128386	-0.240362	0.0136597	0.000875967	-0.231488	71.1303	66.0599	60.809	74.9807	59.0853	68.79	68.2049	57.8101	76.0388	79.8569
chrIII:9332244-9334191:-	elo-4	C40H1.4	WBGene00001242	0.511634	0.109448	0.373845	0.715599	0.701042	0.788813	0.00189313	0.921138	0.275819	0.569726	0.351053	-0.167189	0.168464	0.192437	0.94206	0.0765298	4.09459	5.23863	6.3903	2.52593	3.55528	5.5991	10.5028	5.04815	5.24101	3.47083
chrIV:5374590-5377267:-	elo-5	F41H10.7	WBGene00001243	1.86116e-19	3.41257e-08	0.0990898	5.01034e-05	9.10498e-08	5.29226e-13	2.66907e-08	5.5247e-11	-0.773365	-0.496215	-0.236628	-0.373136	-0.468304	-0.834526	-0.657947	-0.761074	233.587	280.605	291.078	289.396	276.982	189.912	215.512	200.243	384.438	438.976
chrIV:5386619-5388551:-	elo-6	F41H10.8	WBGene00001244	0.000162055	0.19506	3.32549e-06	0.196042	0.0978539	8.82397e-08	0.474525	6.74265e-06	-0.423675	-0.17874	-0.490132	-0.173062	-0.2038	-0.561931	-0.10633	-0.477917	386.665	455.486	300.064	431.675	432.432	285.18	393.904	302.767	473.743	569.237
chrIV:9529970-9531210:+	elo-7	F56H11.3	WBGene00001245	0.0423245	0.51817	0.2858	0.0125993	0.836267	0.880828	0.596142	0.764444	-0.793176	-0.324922	0.477394	-0.933687	0.115315	0.143942	0.27555	0.225399	0.718649	1.33749	4.02868	0.523385	2.06649	2.87327	3.2825	3.11831	2.71286	2.12431
chrIII:11230283-11231979:-	elo-8	Y47D3A.30	WBGene00001246	0.149804	0.0675138	0.106917	0.995825	0.00949104	0.978411	0.694647	0.551554	0.507401	0.623437	0.558774	0.00472254	0.778344	0.0305396	0.185548	-0.316013	4.17445	4.5533	9.17885	2.46662	5.01039	5.84015	6.67336	4.28141	6.31688	2.8653
chrII:14959300-14964034:-	elo-9	Y53F4B.2	WBGene00001247	0.381098	0.186424	0.533152	0.272813	0.920905	0.652227	0.288158	0.532534	-0.218321	-0.3141	0.206065	-0.259884	0.0313822	-0.210103	-0.313396	-0.249711	8.85827	8.13386	10.9614	8.02166	10.2066	7.95166	7.32758	7.71591	10.448	11.3693
chrV:20764924-20770130:-	elp-1	F38A6.2	WBGene00001248	0.670107	0.803767	0.297254	0.258833	0.531845	0.55719	0.895454	0.944082	0.11431	-0.0765465	0.255573	-0.25454	0.147458	-0.210325	-0.0484861	-0.0368517	5.47253	4.68907	6.00035	3.87955	5.35942	4.24778	4.78199	4.82409	5.53155	5.4738
chrIV:9615139-9620124:+	elt-1	W09C2.1	WBGene00001249	0.942092	0.103816	0.422019	0.0134271	0.736288	0.679372	0.727847	0.823768	-0.0277253	0.409019	-0.262147	0.557075	0.105895	0.202064	-0.135239	-0.122776	3.65333	5.0504	3.47123	5.34593	3.87949	4.97908	3.83428	3.87129	4.7562	4.0668
chrX:10481177-10483520:+	elt-2	C33D3.1	WBGene00001250	0.751542	0.582617	0.00506162	0.621404	0.902134	0.963776	0.609519	0.555975	0.0964601	-0.162282	0.604822	-0.138838	0.0397843	-0.0327444	0.157558	-0.216829	8.71938	7.07266	11.1577	6.79575	7.98461	6.91771	7.97465	5.99736	7.89159	8.82844
chrX:13934815-13941030:+	elt-3	K02B9.4	WBGene00001251	0.00631473	0.639591	0.143559	0.00235482	0.0229569	0.791235	0.962898	0.718817	-0.574174	-0.140642	0.462802	-0.628791	-0.462138	-0.172736	-0.0260687	-0.197704	6.22139	8.5444	8.82834	5.57032	6.48622	5.25917	5.93581	5.14654	6.75569	10.4683
chrX:10475347-10475913:+	elt-4	C39B10.6	WBGene00001252	NA	NA	0.524873	0.998694	0.554519	0.935726	0.950905	NA	0.368465	-0.0641493	0.323305	-0.00303558	0.265869	0.0892518	0.0428335	-0.0190117	1.37173	0.523631	1.70093	0.590948	1.0739	1.11902	1.01705	0.886721	1.0316	0.695502
chrIV:1917854-1921640:+	elt-6	F52C12.5	WBGene00001253	0.661019	0.290378	0.534919	0.724091	0.472301	0.933302	0.783719	0.991009	0.20604	0.430321	0.309048	0.167556	0.291485	-0.0896335	0.160476	-0.0141281	1.68375	2.05025	1.85862	1.5204	1.74123	1.23454	1.60517	1.33913	1.5158	1.49983
chrV:18860259-18894945:-	emb-4	Y80D3A.2	WBGene00001258	0.235157	0.385079	0.931257	2.50261e-05	0.00227616	0.22631	0.460301	0.317334	0.124685	0.0996379	0.0169564	0.353112	0.259666	0.166531	-0.0977073	0.142679	46.5888	45.1611	45.8614	51.0883	48.9797	50.96	42.294	50.1013	50.5375	46.4826
chrIII:4715256-4720635:-	emb-5	T04A8.14	WBGene00001259	0.611684	0.672117	0.00293412	0.00375719	0.595558	0.385438	0.67848	0.835834	0.0535126	0.0478198	-0.315938	0.21794	-0.0528246	0.140777	-0.0650587	0.0488641	99.5102	97.8342	72.0232	104.286	88.3293	99.4516	85.9969	93.2	100.434	104.409
chrIII:5196639-5199649:-	emb-8	K10D2.6	WBGene00001262	0.429297	0.28203	0.385464	0.17386	0.180948	0.36653	0.828166	0.901408	-0.0897352	-0.118088	-0.119037	-0.13771	-0.130257	-0.146432	-0.0388763	0.0319993	103.391	100.039	91.3369	93.3186	96.0743	89.5753	96.6819	101.649	110.847	119.94
chrIII:9336794-9344363:-	emb-9	K04H4.1	WBGene00001263	7.08187e-07	1.92395e-10	0.00378438	0.0929854	0.825803	0.254815	4.95627e-12	0.97061	-0.408002	-0.514038	-0.279615	-0.161682	0.0295011	-0.152288	-0.588706	-0.00967057	117.872	107.915	145.761	131.041	153.333	159.419	117.244	176.261	197.943	171.076
chrII:8159777-8162118:-	emb-27	F10B5.6	WBGene00001281	0.0349137	0.892774	0.0056068	0.929346	0.115687	0.960117	9.2112e-05	0.800872	-0.215192	0.0228208	-0.358669	0.0146485	-0.159984	0.020704	-0.478102	-0.0689519	51.8808	60.5624	41.3773	56.976	51.5896	54.2265	38.0107	50.8864	59.6314	65.779
chrIII:9434999-9441376:-	emb-30	F54C8.3	WBGene00001284	0.97902	0.840215	0.069797	0.969935	0.0159131	0.466368	0.411455	0.930872	-0.00415236	0.0296494	-0.204698	0.00586515	-0.210589	0.122167	-0.109041	-0.0221832	43.3018	43.796	33.8901	40.7273	35.8148	42.6768	36.2656	38.5604	43.6901	47.3058
chrV:10896637-10897126:-	emo-1	F32D8.6	WBGene00001303	0.00613126	0.00242513	0.048306	0.00513146	0.000104824	0.360814	0.20174	0.0799249	-0.227557	-0.250254	-0.259835	-0.230218	-0.297216	-0.168533	-0.182476	-0.25057	548.478	532.872	461.018	511.522	499.376	492.013	487.149	464.201	618.663	700.931
chrI:1842447-1843521:+	emr-1	M01D7.6	WBGene00001309	0.158086	0.00984255	0.260889	0.00396024	0.0301858	0.533134	0.709353	0.887936	0.208397	0.342974	-0.219556	0.3689	0.278772	0.17252	0.0917441	0.0539706	67.7531	73.6223	49.3444	70.9956	68.1173	65.4857	61.8202	60.1302	64.4883	63.5785
chrV:13985122-13986985:+	end-1	F58E10.2	WBGene00001310	NA	NA	0.821523	0.0663298	0.785313	NA	NA	NA	0.224431	0.468943	-0.102603	0.656842	0.134012	0.385348	0.0770161	0.122433	0.557471	0.972118	0.039257	1.27829	0.421831	0.657298	0.236458	0.291447	0.159339	0.264956
chrV:14014686-14015961:+	end-3	F58E10.5	WBGene00001311	NA	NA	0.540869	0.842522	0.947646	NA	NA	NA	0.318301	0.195004	-0.238972	0.101391	-0.0370489	-0.0676208	0.0551826	-0.134684	0.651183	0.498182	0.0963618	0.371695	0.266533	0.258799	0.399758	0.193204	0.374275	0.327561
chrIV:11653395-11655447:-	ent-1	ZK809.4	WBGene00001320	0.0177084	0.233621	0.00048541	0.718242	0.778748	0.366675	0.0327838	0.746985	-0.243057	0.14144	-0.466723	-0.0511083	-0.0403345	-0.186462	-0.308005	0.0882429	90.5775	117.346	67.7139	96.8659	99.9002	82.7259	75.8825	100.764	105.537	117.127
chrIV:4793194-4799348:-	eor-1	R11E3.6	WBGene00001324	3.76099e-05	6.44354e-05	0.983874	0.000396735	2.78897e-05	0.00418985	0.00731037	0.046993	0.487689	0.480134	-0.00580723	0.426642	0.479073	0.39347	0.354804	0.29227	22.6596	22.2491	17.9996	20.2514	21.5343	23.9371	23.2917	22.2667	20.1576	17.4184
chrX:14602997-14608590:+	eor-2	C44H4.7	WBGene00001325	0.0263552	0.355612	0.982482	0.00297677	0.0158915	0.952633	0.0920216	0.837172	0.378467	0.194442	0.00906764	0.479194	0.385771	0.0376155	-0.36729	-0.089731	8.27672	7.1413	7.33571	8.3137	7.95576	7.47882	5.53968	6.81241	8.128	6.83443
chrIV:10666807-10679421:+	epi-1	K08C7.3	WBGene00001328	0.096656	0.13113	0.0707338	0.228748	0.0404144	0.68786	0.123069	0.999177	0.165029	-0.15564	0.174223	0.125671	0.187459	0.0712613	0.152567	0.000609824	63.3145	49.8684	71.345	57.5575	61.5219	66.3645	70.2654	63.1527	70.4059	61.4013
chrX:14815915-14818438:-	epn-1	T04C10.2	WBGene00001329	8.86621e-28	0.0167157	0.845996	9.12328e-06	0.00118986	0.5875	0.891521	0.86345	1.02855	0.275228	0.0465825	0.456919	0.337051	0.135753	-0.0345115	0.0543911	68.0869	39.4077	33.0244	42.4479	39.908	35.179	31.1605	33.2106	35.6221	35.7929
chrIV:14879458-14900621:+	eps-8	Y57G11C.24	WBGene00001330	0.0548184	0.287165	9.38777e-10	0.73506	2.64944e-11	0.772868	0.323663	0.892937	0.227718	-0.147802	0.701744	0.0542596	0.640086	0.0837527	0.156966	-0.0414646	18.852	14.2583	27.058	15.5698	24.13	17.423	18.3502	15.9243	18.2927	17.4698
chrX:10156799-10160379:-	erd-2	F09B9.3	WBGene00001331	0.302012	0.720131	0.311394	0.446207	0.303334	0.000699789	0.000432425	0.55221	0.138032	-0.0609252	0.177282	-0.107295	-0.130439	-0.495828	-0.495778	-0.142989	46.0448	39.4835	41.1889	36.131	36.3987	25.4079	25.3903	32.7484	40.4649	45.4809
chrIV:415637-419958:-	eri-1	T07A9.5	WBGene00001332	0.809668	0.879006	0.0912978	0.721302	0.0159673	0.893176	0.925604	0.937644	0.0399042	-0.0283313	-0.252284	0.0541998	-0.252907	0.0484036	-0.0237921	-0.0265004	36.3331	34.1707	25.6058	34.2575	28.2407	31.7958	30.159	30.1025	34.2215	38.4734
chrI:5284060-5291607:-	erm-1	C01G8.5	WBGene00001333	0.688983	0.817069	0.0651912	0.961169	0.39499	0.440122	0.273448	0.78716	0.0457944	-0.0299636	0.181644	-0.00682908	-0.0805504	-0.111919	-0.120113	-0.0516691	128.567	120.34	135.952	115.738	112.511	110.591	109.962	115.392	133.458	135.604
chrI:14664438-14674811:+	ero-1	Y105E8B.8	WBGene00001334	0.841971	0.0862031	0.409973	0.299116	0.851884	0.322765	0.0070827	0.75357	0.0323399	-0.194447	-0.125233	0.124263	-0.028824	-0.169721	-0.321897	-0.0740074	49.5932	41.7142	44.4161	49.4183	45.4159	43.0213	38.6262	46.056	54.1543	52.7967
chrX:3800025-3802751:-	erp-1	F35A5.8	WBGene00001335	2.39409e-09	0.949519	0.071829	0.942996	0.0621891	0.0652717	0.0641813	0.0401909	0.866214	-0.019273	-0.405557	0.0205914	-0.314961	-0.451448	-0.415078	-0.473728	19.3215	10.0253	6.76677	9.76991	7.833	6.54741	6.72675	6.43601	10.2443	11.2221
chrIV:15008471-15013151:-	qars-1	Y41E3.4	WBGene00001336	0.589174	0.981034	0.968107	0.00785916	0.0150649	0.0717698	0.245983	0.606043	0.0626226	-0.00386046	-0.00813521	0.225869	0.202648	0.213666	-0.137246	0.0900877	88.748	83.5686	87.8657	92.9746	93.6306	102.734	80.2188	94.1573	98.5604	92.5012
chrI:10336386-10341169:+	ears-1	ZC434.5	WBGene00001337	0.642527	0.0240237	0.868144	0.00225771	0.00501963	0.066041	0.504091	0.0512888	0.0589511	0.213952	-0.0304437	0.271105	0.245777	0.226838	0.0925996	0.228346	110.2	121.254	106.311	119.478	120.188	127.456	115.955	127.609	121.143	115.16
chrIV:388711-390439:-	ears-2	T07A9.2	WBGene00001338	0.255105	0.808946	0.774244	0.542169	0.00667821	7.9781e-06	1.64207e-08	0.717508	-0.181385	-0.0521795	-0.0738949	-0.106668	-0.351432	-0.697024	-0.849619	-0.112625	25.1107	27.2179	23.7565	24.7517	21.2608	15.111	13.49	23.1063	27.9684	31.1561
chrII:162374-170628:+	etr-1	T01D1.2	WBGene00001340	0.202944	0.0862475	0.601161	0.00304308	0.163927	0.523645	0.96065	0.848971	0.140783	0.181797	-0.0800471	0.277676	0.142282	0.116522	-0.0103093	-0.0456255	30.1526	30.628	28.7522	31.0172	28.8619	33.029	30.1969	29.4556	33.9275	29.7407
chrV:6003584-6016070:+	fos-1	F29G9.4	WBGene00001345	0.209705	0.0107656	0.453663	0.0535715	0.504113	0.783996	0.68017	0.0441835	0.246445	-0.459665	0.192947	-0.355186	0.140304	-0.12274	-0.120762	0.436043	12.8708	7.55063	12.4327	7.72473	11.38	9.83815	9.84224	14.8973	12.0204	11.707
chrIII:4302809-4313097:-	evl-14	H38K22.1	WBGene00001352	0.0541967	0.112749	0.0721241	0.000357036	0.132634	0.0583069	0.923549	0.49064	0.203556	0.17733	-0.189354	0.338731	0.158585	0.21381	0.0175215	0.105949	42.0151	40.7391	33.1453	43.1547	38.9286	44.0327	38.3478	40.8098	42.2496	39.6433
chrII:8444254-8445126:+	evl-20	F22B5.1	WBGene00001358	0.305287	0.98151	0.46649	0.110279	0.000968148	0.974491	0.000654869	0.770198	-0.191914	0.00664411	-0.1788	-0.271851	-0.480615	-0.0202805	-0.626967	-0.110079	37.4759	42.7374	30.0513	33.0655	29.064	33.7718	21.551	31.6379	38.2517	46.9245
chrI:14512651-14518707:-	exc-4	Y105E8A.22	WBGene00001365	0.134661	0.141384	0.19326	0.204155	0.130309	0.959797	0.0604887	0.595021	-0.250769	-0.252775	-0.253406	-0.217163	-0.237405	-0.0273763	-0.341249	-0.154438	33.6838	33.1819	28.1807	32.2472	32.5225	33.217	26.4538	30.301	37.8382	43.9691
chrIV:8799076-8804844:-	exc-5	C33D9.1	WBGene00001366	0.621482	0.946911	0.103219	0.0191268	0.963486	0.798027	0.33808	0.44882	0.126924	-0.0226634	0.353005	-0.456909	0.0147665	-0.117966	0.232701	0.230397	6.08651	5.37883	7.68402	3.68742	5.35363	5.41048	7.03453	7.02786	6.59906	6.03426
chrII:9575912-9581409:+	exc-7	F35H8.5	WBGene00001368	0.159491	0.0485015	0.438529	0.967145	6.43139e-05	0.619639	0.294169	0.718929	0.412208	0.547659	0.282256	-0.0191017	0.93117	0.256488	0.353765	0.194445	3.47846	3.82434	3.93216	2.29556	4.98487	3.86296	4.16031	3.65574	3.47316	2.71037
chrII:14412121-14413389:-	exl-1	F26H11.5	WBGene00001371	0.652954	0.981292	0.704691	0.28343	0.010608	0.998981	0.941248	0.958688	-0.0910159	-0.00642061	0.0868903	-0.18306	-0.357955	-0.00128704	0.0217689	0.0209641	42.2893	44.3463	47.1606	36.9492	33.3636	44.208	45.0016	44.973	49.4012	49.1964
chrI:11907546-11909271:-	exo-3	R09B3.1	WBGene00001372	0.0134471	0.885116	0.000248486	0.580081	0.164414	0.985941	0.307309	0.604775	-0.281495	-0.0277652	-0.442502	-0.0816694	-0.166229	-0.00807023	-0.154825	-0.112818	78.0885	92.1927	64.6715	84.0512	81.045	88.0846	79.388	81.7824	98.8481	103.877
chrII:6156986-6160993:-	exp-1	H35N03.1	WBGene00001373	0.914935	0.627529	0.952259	0.527549	0.928511	0.949825	0.691879	0.775518	0.0669836	0.262409	-0.0468992	-0.305076	-0.0548329	-0.0793735	-0.229517	-0.228259	0.64808	0.819019	0.700418	0.350831	0.526751	0.677927	0.532111	0.533666	0.835082	0.644137
chrV:6139819-6143531:+	exp-2	F12F3.1	WBGene00001374	0.515527	0.417861	0.268778	0.00309505	0.605895	0.766852	0.462275	0.365805	-0.244433	-0.300553	0.362646	-0.845104	-0.190624	-0.182736	-0.267996	-0.367856	3.27895	3.08783	4.54943	1.8306	3.27701	2.94923	2.73165	2.51324	3.79556	4.38199
chrI:14220727-14231348:-	eya-1	C49A1.4	WBGene00001377	0.128995	0.000861569	0.837122	1.64307e-05	0.898684	0.318176	0.68168	0.646294	0.577671	1.0997	0.13425	1.34947	0.0695085	0.552066	0.232411	0.318618	1.26121	2.01377	0.762121	2.3694	0.733763	1.20787	0.854747	0.938911	0.716891	0.745248
chrIII:9080290-9081102:-	far-1	F02A9.2	WBGene00001385	0.656893	0.206947	0.807192	0.0126172	0.00415905	1.38228e-06	0.294238	0.861124	0.0558038	-0.133132	0.0353006	-0.225312	-0.247019	-0.397324	-0.110618	0.0345859	919.534	794.063	886.104	705.45	710.617	654.001	799.844	885.727	964.17	963.176
chrIII:9081602-9082813:+	far-2	F02A9.3	WBGene00001386	0.856764	0.371717	0.638246	0.994502	0.265654	0.817621	0.207805	0.00137927	-0.0276957	-0.106423	-0.0663819	-0.00180981	0.117982	-0.0534447	0.141874	0.308976	1897.01	1770.2	1761.39	1805.5	2008.86	1777.38	2039.66	2294.33	2058.66	2107.19
chrV:12996803-12997509:-	far-3	F15B9.1	WBGene00001387	0.393642	0.82856	8.61234e-09	0.560819	1.287e-07	0.8149	0.265514	0.335567	-0.232503	0.0767799	-1.44927	-0.16672	-1.05642	0.145535	0.347693	0.358329	16.4277	20.5364	4.19587	16.1913	8.2978	15.9188	18.7071	18.8446	15.8689	21.375
chrV:12998410-12999644:-	far-4	F15B9.2	WBGene00001388	NA	NA	0.968255	0.716638	0.290918	NA	0.818913	NA	-0.17172	-0.105862	0.0270992	0.175118	0.417535	0.122069	0.126808	0.25084	0.259869	0.320688	0.404942	0.629649	0.953814	0.516511	0.530799	0.702789	0.407858	0.487923
chrV:12995586-12996821:+	far-5	F15B9.3	WBGene00001389	0.567741	0.437257	0.262465	0.285751	0.760541	0.684461	0.510229	0.670955	-0.182367	-0.242028	-0.365211	-0.299428	-0.101258	-0.218989	-0.239255	0.211361	15.6895	14.8025	12.5224	13.388	15.9744	14.1165	13.8829	19.9773	18.8136	19.6908
chrIV:13328335-13329295:+	far-6	W02A2.2	WBGene00001390	0.297241	0.514971	5.49723e-09	0.874716	0.19248	0.266881	0.989618	0.164992	-0.154026	0.108392	-0.638235	-0.030829	-0.173603	-0.186067	0.00270138	0.206328	77.4168	92.2149	57.6186	79.0433	72.9905	79.5603	90.964	105.115	101.281	94.1097
chrII:319793-321107:+	far-7	K01A2.2	WBGene00001391	0.0693005	0.0109465	0.729642	0.0480901	0.328091	0.965314	0.961913	0.937095	-0.573289	-0.771988	-0.156469	-0.609031	-0.323806	0.0406349	-0.0270322	-0.0575025	5.3642	4.43119	7.8233	4.8808	6.34353	9.19158	8.70661	8.49584	9.92863	9.49621
chrIII:842928-843796:+	far-8	K02F3.3	WBGene00001392	0.693723	0.00933665	0.213624	0.019866	0.341688	0.00158568	0.000204822	0.110724	0.0915522	-0.435237	0.206044	-0.389623	-0.179963	-0.463884	-0.512209	-0.272938	105.052	70.5755	105.145	69.2912	82.4211	65.0727	62.7677	74.5288	101.195	107.067
chrIV:13315620-13318759:+	fat-1	Y67H2A.8	WBGene00001393	6.01237e-10	0.542852	0.0184542	2.37788e-05	1.58735e-10	0.764147	0.790565	0.0639099	-0.433108	-0.0649836	-0.249894	-0.307088	-0.438185	-0.0678926	0.043852	0.215544	331.714	423.614	348.109	338.617	316.095	395.823	428.295	483.406	463.16	489.431
chrIV:13323834-13326370:+	fat-2	W02A2.1	WBGene00001394	0.00018173	0.924052	0.00929957	0.292016	5.48653e-12	0.884249	0.222396	0.477839	-0.252578	0.0120806	-0.24394	-0.0878327	-0.4289	-0.0348851	0.13089	0.102744	567.068	673.533	554.644	594.448	479.356	642.458	721.909	707.766	734.421	737.103
chrIV:9803006-9806101:+	fat-3	W08D2.4	WBGene00001395	2.52073e-20	1.3715e-05	0.876777	8.32174e-16	0.003197	0.729858	0.146258	0.873909	-0.814701	-0.413582	-0.0408089	-0.718239	-0.282618	-0.109181	-0.243568	-0.0540956	95.2778	125.039	166.77	95.2482	132.69	158.777	144.119	165.195	191.597	184.52
chrIV:9799409-9802211:+	fat-4	T13F2.1	WBGene00001396	0.00055002	0.00119721	0.0222406	0.00423274	3.40418e-06	0.652908	0.68583	0.464172	-0.278889	-0.266527	-0.26076	-0.236048	-0.352512	-0.0945522	-0.0656914	-0.125005	141.278	140.729	126.994	136.005	128.299	142.892	145.814	139.839	170.389	187.155
chrV:17723754-17726799:+	fat-5	W06D12.3	WBGene00001397	0.824531	0.709031	0.360699	0.293239	0.990415	0.998981	0.911959	0.587096	-0.116848	-0.188919	-0.44435	0.409334	-0.00648003	0.00190335	0.0789857	0.362161	0.914218	0.838764	0.248685	1.39778	0.973755	0.551531	0.619038	0.901971	0.612307	1.11558
chrIV:11913667-11917317:-	fat-6	VZK822L.1	WBGene00001398	0.00052148	1.72786e-12	0.753242	0.00811935	3.85145e-05	0.591432	0.0136871	0.371597	-0.265351	-0.502606	0.0697089	-0.20957	-0.299839	0.135956	0.352506	0.182907	108.952	91.0251	104.562	105.865	101.705	109.659	128.082	113.42	110.952	142.939
chrV:7151337-7153127:-	fat-7	F10D2.9	WBGene00001399	0.0194408	4.13603e-37	0.773349	0.00227327	2.34509e-06	0.273289	2.36609e-10	0.0252573	-0.47739	1.96585	-0.17842	-0.602113	-0.847794	0.594668	2.17632	0.936087	6.80376	40.4391	3.37754	5.77895	4.92601	9.95806	54.2917	14.8957	4.97534	10.6297
chrX:3196297-3199311:-	fax-1	F56E3.4	WBGene00001400	NA	NA	0.991592	NA	NA	NA	NA	NA	0.0361919	-0.0353884	0.00677086	-0.00256989	-0.0562423	0.0538777	-0.0495951	0.0868494	0.0977513	0.0622549	0.0851325	0.0728591	0.0535919	0.106999	0.0590719	0.125318	0.091519	0.0870799
chrII:6078239-6080785:-	fbf-1	H12I13.4	WBGene00001401	0.118025	0.0910438	0.984298	0.0376885	0.373309	0.679372	0.475315	0.828671	0.171956	0.186128	0.00532601	-0.217427	-0.103367	0.103068	0.118694	0.0604158	44.2915	44.168	34.3016	31.4128	34.8772	36.755	37.1929	35.6743	38.1162	42.7333
chrII:6088639-6091452:-	fbf-2	F21H12.5	WBGene00001402	0.895417	0.234921	0.898453	0.219145	0.385553	0.872457	0.396784	0.79154	0.023263	0.148468	0.0322977	-0.149245	-0.106644	0.0567414	0.148605	0.0767645	33.0524	35.65	29.2091	27.3114	28.8313	29.7071	31.7492	30.1438	31.833	35.4167
chrIV:9540791-9546233:+	fbl-1	F56H11.1	WBGene00001403	0.00632941	0.296094	0.0643565	0.00607844	0.0157494	0.0945423	0.0644481	0.0119666	-0.402301	-0.188202	-0.373781	-0.402006	-0.344461	-0.381268	-0.372411	-0.496269	9.97297	11.4877	10.9097	9.3152	9.94477	10.8605	10.9261	9.97819	16.0436	14.5216
chrI:2580937-2586126:-	fbp-1	K07A3.1	WBGene00001404	9.88551e-06	1.04169e-06	0.000319657	0.000510437	9.91381e-06	0.860177	0.569467	0.694344	-0.42248	-0.465856	-0.343625	-0.340981	-0.411742	-0.0434998	-0.0774343	0.0730197	155.073	148.395	147.418	153.599	149.423	182.223	177.864	197.736	209.514	227.662
chrI:9711058-9712757:-	fce-1	C04F12.10	WBGene00001405	0.57558	0.784021	0.581733	0.407636	0.122558	0.524025	0.987113	0.852643	0.0739988	-0.0428207	-0.0881105	0.10012	-0.159488	0.12265	-0.00319171	0.0467435	82.1602	74.7275	71.4048	78.151	66.6347	82.9369	75.8378	78.5907	84.7933	84.9496
chrV:20425270-20431306:+	fce-2	F48F5.5	WBGene00001406	0.339154	0.323618	0.360307	0.826569	0.185037	0.981765	0.243227	0.950173	-0.213539	-0.22493	-0.216164	-0.0607183	-0.260714	0.0154909	-0.260881	0.0298773	17.8136	17.4381	14.1722	18.6286	16.4547	16.8263	13.7119	16.9981	18.5603	22.7273
chrIII:2549918-2560677:+	feh-1	Y54F10AM.2	WBGene00001410	2.08078e-06	0.0900649	4.96751e-20	0.390816	0.842884	0.50536	0.965821	0.0212805	1.01049	0.439558	1.75389	0.247452	-0.0708814	-0.263444	0.0204671	-0.597622	7.05109	4.50101	11.2841	3.67585	2.93314	2.46001	3.04815	1.8622	3.34121	3.51678
chrIV:5533131-5537921:-	fem-1	F35D6.1	WBGene00001411	0.168181	0.343793	0.409209	0.350934	0.00920653	0.915711	0.380379	0.800703	-0.157193	-0.119513	-0.133778	-0.11281	-0.252853	0.0373222	-0.13928	0.0678	42.3136	42.8729	37.0918	40.7661	37.821	41.8991	36.9454	42.8121	45.5111	51.5012
chrIII:632021-634623:-	fem-2	T19C3.8	WBGene00001412	0.0153098	0.849578	0.203687	6.3659e-06	7.54819e-05	0.288625	0.344828	0.152903	0.24099	0.0312963	-0.210983	0.407495	0.35226	0.213827	-0.166467	0.250847	57.9269	49.2999	46.2772	60.8503	59.908	62.7755	47.783	64.4647	60.0659	53.2306
chrIV:9104951-9107595:+	fem-3	C01F6.4	WBGene00001413	0.957375	0.878742	0.000106847	0.680769	7.78958e-06	0.145892	0.583471	0.467292	-0.0108485	-0.0308727	-0.534895	0.0668426	-0.476629	0.263478	0.109029	0.162332	47.0322	45.8205	28.7316	46.4043	32.295	51.0115	45.6727	47.4578	47.1194	51.6266
chrI:8623011-8631178:-	fer-1	F43G9.6	WBGene00001414	0.550688	0.129443	0.0721758	0.821845	1.60844e-10	0.0203552	0.000170776	0.000483513	0.255082	0.544396	0.569607	-0.110867	1.72075	0.744866	1.03756	0.987222	0.411116	0.52688	1.09507	0.268165	1.34046	1.26151	1.6013	1.53692	0.744913	0.350936
chrV:15000634-15002178:-	fib-1	T01C3.7	WBGene00001423	0.644283	0.965733	0.971205	0.00242979	3.20674e-05	0.153888	0.168513	3.24416e-08	0.168275	-0.0211797	-0.0146654	0.773676	0.99896	0.365776	0.313654	1.00053	107.121	90.559	103.065	162.95	199.533	136.895	131.683	219.617	116.196	101.817
chrII:6755100-6755924:+	fis-1	F41G3.4	WBGene00001424	0.317986	0.687134	0.924531	0.920382	0.0634597	0.655211	0.765388	0.560801	-0.44465	0.218542	-0.0648934	0.0611405	0.686925	-0.307583	-0.168755	-0.349259	1.34509	3.06396	8.9995	2.44331	4.71434	7.07787	8.13163	6.80512	10.6987	2.63176
chrX:8283228-8285167:-	fis-2	F13B9.8	WBGene00001425	0.277885	0.00875744	0.230002	0.850197	0.0829711	0.66103	0.170187	0.810763	0.23988	-0.513401	-0.305151	-0.0550775	-0.334695	-0.182782	-0.34026	-0.111232	32.4315	18.2721	19.7021	24.403	20.2638	21.6091	19.2164	22.8532	27.7295	29.6008
chrIV:11036527-11038145:+	fkb-1	F36H1.1	WBGene00001426	0.663817	0.45707	0.954054	0.622283	0.0427379	0.936036	0.0781634	0.26257	0.0542785	0.0869813	-0.0118442	0.0588076	-0.18047	0.0241475	0.193133	-0.154138	111.894	113.023	93.4447	104.859	90.7196	95.8282	107.972	84.5272	105.088	117.325
chrI:12918711-12919282:+	fkb-2	Y18D10A.19	WBGene00001427	0.985521	0.0642295	0.508492	0.633314	0.0487152	0.304938	0.417507	0.892937	0.00295766	0.194541	-0.0960365	0.0626827	0.191727	0.157673	0.111035	-0.0341828	284.726	321.617	264.258	277.304	310.917	316.01	305.848	276.035	315.35	309.493
chrV:7225351-7226296:+	fkb-3	C05C8.3	WBGene00001428	0.532318	0.384003	0.408825	0.463842	0.93388	0.92188	0.255335	0.0203231	-0.11931	-0.160473	-0.166282	-0.132943	-0.0192578	0.0428537	0.209252	0.382397	32.7099	31.337	30.1254	30.2953	33.6104	35.0218	39.5012	44.7344	37.8807	38.8317
chrV:12785136-12787087:-	fkb-4	ZC455.10	WBGene00001429	0.355985	0.440366	0.067219	0.613417	0.93777	0.929178	0.676888	0.401363	0.419177	0.373658	0.744036	-0.252328	-0.0474343	0.096574	0.23247	-0.478814	1.75996	1.65849	3.08725	0.719852	0.98251	1.58816	1.84499	0.772796	1.58615	1.176
chrI:3898049-3899909:-	fkb-5	C50F2.6	WBGene00001430	0.877096	0.22192	0.0236827	0.504344	0.948415	0.920621	0.822439	0.0848647	0.0469229	0.264384	-0.477513	-0.158993	-0.0195674	0.0558966	0.0740491	-0.405235	10.9493	12.6867	7.60995	8.79665	9.9678	11.3495	11.5008	8.04313	12.1396	11.5183
chrV:20846127-20847706:+	fkb-6	F31D4.3	WBGene00001431	0.0202782	2.0823e-05	0.116785	1.09465e-13	2.81445e-05	0.0516086	0.103668	0.224565	0.241933	0.408876	-0.176255	0.667459	0.38963	0.227693	0.180215	0.160506	159.434	176.93	157.208	201.098	169.229	209.001	202.164	199.361	198.565	146.364
chrI:10667944-10671005:+	fkb-7	B0511.1	WBGene00001432	0.297838	0.105153	0.870059	0.0927023	0.510778	0.647831	0.21001	NA	0.467134	0.676101	0.110555	0.677921	0.308929	0.337635	0.561968	0.24532	0.952517	1.23346	0.678091	1.16429	0.735512	0.955859	1.30567	0.838744	0.613501	0.482758
chrI:12916431-12918098:+	fkb-8	Y18D10A.25	WBGene00001433	1.56284e-05	0.25054	2.00825e-13	1.05508e-05	2.16667e-07	3.28955e-08	1.98048e-08	0.460733	0.6086	0.211447	0.948783	0.61732	0.692205	0.750648	0.755214	-0.176702	35.9409	26.6101	43.7316	33.8504	36.4782	37.9393	38.0705	19.4309	24.6257	25.1922
chrX:3740194-3742309:-	fkh-2	T14G12.4	WBGene00001434	NA	NA	NA	0.0717095	0.997642	NA	NA	NA	-0.00898243	0.224185	0.0836471	0.622904	-0.00161192	0.112245	0.0671177	0.0498715	0.12215	0.259642	0.109505	0.542416	0.129778	0.127004	0.0980809	0.084803	0.0558821	0.13759
chrX:13421754-13423343:-	fkh-3	C29F7.4	WBGene00001435	0.435036	0.101592	0.0276883	0.0298249	0.987516	0.451368	0.608334	0.713589	0.204882	0.377473	-0.727885	0.460612	0.00527793	0.374014	-0.22677	0.219917	8.68889	9.77165	3.31786	9.84647	7.15205	8.70026	5.20191	7.63242	7.06858	8.10672
chrX:13427041-13428781:-	fkh-4	C29F7.5	WBGene00001436	0.473184	0.00275518	0.0841871	0.0161016	0.97739	0.649004	0.979626	0.8447	0.207031	0.655048	-0.641806	0.538935	0.011043	0.292621	-0.0176161	0.145262	5.86654	8.14901	2.34139	7.06197	4.83394	5.58319	4.23769	4.90039	4.80191	5.44517
chrIII:4844626-4846510:+	fkh-5	F26A1.2	WBGene00001437	0.127669	4.24567e-13	0.996842	0.479664	0.955385	0.0203673	7.95994e-27	0.022402	0.615499	2.28621	-0.00368267	0.327922	-0.0346001	0.930979	3.20219	0.895117	1.04929	4.82446	0.511532	0.706932	0.475116	1.46054	10.0582	1.40495	0.545454	0.527352
chrII:4379886-4383290:-	fkh-6	B0286.5	WBGene00001438	0.90564	0.899817	0.700001	0.532213	0.587102	0.939472	0.814007	0.753936	0.0734612	-0.0806279	0.223211	0.296276	0.257343	-0.0879031	0.148016	0.239298	1.43212	1.17013	1.82725	1.71274	1.67677	1.27142	1.68338	1.86529	1.57417	1.42781
chrIV:5584651-5610353:+	fkh-7	F26D12.1	WBGene00001439	0.01014	0.960229	0.00352328	0.695818	0.224828	0.000114204	4.7955e-05	0.000491414	0.488783	-0.0180705	0.585335	0.105568	0.251851	0.752882	0.767519	0.681561	5.75666	3.89855	5.04455	4.0528	4.61881	5.72172	5.77725	5.41888	3.6253	4.36382
chrII:6189551-6191373:-	fkh-8	F40H3.4	WBGene00001440	0.920473	0.884779	0.729585	0.462324	0.982954	0.85699	0.308359	0.764983	0.0623851	0.0934163	0.210011	-0.346451	-0.0136466	0.1756	0.480595	-0.235731	1.05175	1.08073	1.04221	0.555641	0.910298	1.00156	1.44542	0.5581	0.880725	1.05711
chrX:3816906-3826944:-	fkh-9	K03C7.2	WBGene00001441	0.28473	0.984065	0.0344398	0.698846	0.000335019	0.884249	0.77797	0.969538	0.252127	-0.00733779	0.492051	0.108535	0.642376	-0.0850385	0.101446	-0.0235731	7.0095	5.69166	8.3444	5.8705	8.93858	5.37575	6.19925	5.63291	6.39547	6.31558
chrI:10163465-10165125:-	fkh-10	C25A1.2	WBGene00001442	0.979449	0.869368	0.763369	0.775011	0.937806	0.835994	0.894759	NA	-0.0163224	-0.102307	0.179406	-0.152593	0.0470982	0.188474	0.0886887	0.204252	0.714494	0.602699	0.610149	0.522945	0.752804	0.62559	0.508577	0.639027	0.460711	0.80063
chrIII:8675441-8683612:-	fli-1	B0523.5	WBGene00001443	0.19032	0.773264	0.196731	0.216294	0.746394	0.443766	0.331541	0.392252	0.140146	0.042414	-0.156321	0.132217	-0.042735	0.126644	0.124171	0.132115	49.9133	46.0366	38.4462	46.345	41.9636	46.9534	46.8741	47.1404	47.9009	49.2584
chrIV:9144678-9146105:+	flp-1	F23B2.5	WBGene00001444	0.0247734	0.0150928	0.763095	2.30657e-06	0.00216809	0.205759	0.0653543	0.0319308	-0.437926	-0.476132	0.0961794	-0.844332	-0.545929	-0.342081	-0.404193	-0.478929	23.368	22.4141	32.7143	16.153	20.6208	23.5648	22.5112	21.2649	33.9648	35.2225
chrX:10094373-10095167:-	flp-2	W07E11.3	WBGene00001445	0.734227	0.122747	0.70227	0.0453065	0.556094	0.893749	0.966488	0.921926	-0.179667	-0.636343	0.218466	-0.764246	-0.272052	-0.134737	-0.0315475	-0.0903873	3.04598	1.76593	3.69318	1.4203	2.62517	2.51079	2.82356	2.64343	3.26399	4.00311
chrX:10092049-10092905:-	flp-3	W07E11.2	WBGene00001446	0.563091	0.575489	0.828775	0.0055826	0.893039	0.822181	0.212685	0.437856	-0.220162	-0.223499	-0.102837	-0.793862	-0.0600311	-0.151672	-0.413362	-0.337104	8.56038	8.42842	10.8846	4.908	9.33824	10.4775	8.4189	8.9556	13.1968	11.2011
chrII:10054566-10055497:+	flp-4	C18D1.3	WBGene00001447	0.648031	0.378431	0.441882	0.272813	0.565623	0.973513	0.808925	0.786613	-0.195283	-0.345486	0.333759	-0.396153	-0.22298	-0.0382862	-0.133222	-0.190199	7.513	6.47897	9.99209	5.86018	7.00594	7.1945	6.55967	6.20724	8.27127	9.69565
chrX:8528197-8531023:+	flp-5	C03G5.7	WBGene00001448	0.736709	0.260188	0.997722	0.178993	0.420951	0.679171	0.360107	0.543273	-0.134676	-0.377447	0.00171203	-0.420825	-0.261317	-0.229967	-0.324668	-0.285288	9.32754	7.51611	10.5709	6.8787	8.03578	8.73856	8.07868	8.35137	11.7733	11.3384
chrV:9471949-9473784:+	flp-6	F07D3.2	WBGene00001449	0.0935576	0.668628	0.776592	0.325176	0.751298	0.909292	0.778333	0.655239	0.37447	0.130908	-0.105191	0.24116	-0.0921001	-0.0729075	-0.104793	-0.188548	19.8923	16.3627	16.6029	16.8593	13.3987	17.0296	16.6128	15.5785	20.083	16.3453
chrX:5885830-5886798:+	flp-7	F49E10.3	WBGene00001450	0.583435	0.524801	0.830502	0.308702	0.239905	0.969524	0.854964	0.764695	-0.220124	-0.258357	-0.11675	-0.360311	-0.385949	-0.0409146	-0.101226	-0.195312	5.70348	5.44796	5.84661	4.72618	4.73572	6.26956	5.9038	5.43083	7.20729	7.49838
chrX:14881350-14882231:+	flp-8	F31F6.4	WBGene00001451	0.423845	0.465139	0.761428	0.0326549	0.0605038	0.797012	0.389871	0.385601	-0.29792	-0.286826	-0.157284	-0.663362	-0.564084	-0.194227	-0.356835	-0.419926	5.4592	5.44388	4.99443	3.7096	4.15558	4.82242	4.14886	3.92573	6.39408	7.65441
chrIV:12754535-12757650:-	flp-9	C36H8.3	WBGene00001452	0.190188	0.187822	0.468269	0.025308	0.0799084	0.910938	0.263047	0.384762	-0.321263	-0.329703	0.183418	-0.493185	-0.383408	-0.0596398	-0.258902	-0.247561	22.5287	22.0809	33.5618	18.5509	20.5518	28.0559	24.1686	24.3585	32.6817	31.3241
chrIV:7868895-7870063:+	flp-10	T06C10.4	WBGene00001453	0.114296	0.427086	0.67872	0.278464	0.443882	0.99434	0.479452	0.880537	-0.490145	-0.2882	0.184347	-0.355356	-0.253505	0.00847651	0.277264	-0.105445	5.77427	6.76031	7.5321	6.05018	6.74065	6.51209	8.13496	5.88895	7.18553	9.46048
chrX:4677315-4678102:-	flp-11	K02G10.4	WBGene00001454	0.373623	0.48923	0.888872	0.0447919	0.673037	0.932605	0.573671	0.449125	-0.313568	-0.264797	0.0624197	-0.602491	-0.162995	-0.0617439	-0.195698	-0.293555	12.4097	12.7683	15.9527	9.12824	13.4726	14.4745	13.0318	12.043	16.9498	17.5946
chrX:4591254-4592477:-	flp-12	C05E11.8	WBGene00001455	0.121824	0.496326	0.879826	0.00557628	0.19144	0.82212	0.794909	0.672899	-0.403184	-0.214038	-0.0670379	-0.654593	-0.327772	-0.134462	-0.106183	-0.196064	10.6223	12.149	12.2958	8.14139	10.7752	11.6509	11.9213	11.1111	14.4622	15.8309
chrIV:7696923-7698357:-	flp-13	F33D4.3	WBGene00001456	0.960908	0.472587	0.286063	0.214902	0.939081	0.88381	0.9679	0.870372	0.0239862	-0.272796	0.40182	-0.407201	-0.0349658	0.119113	-0.0253099	0.116613	8.30174	6.38944	10.3286	5.41947	7.54958	8.12494	7.14469	8.07878	8.13337	8.86357
chrIII:12910128-12914833:+	flp-14	Y37D8A.15	WBGene00001457	0.983662	0.519191	0.87494	0.128119	0.460746	0.762084	0.877208	0.644577	0.00815439	-0.213379	0.0653432	-0.409313	-0.215169	-0.157877	-0.0651572	-0.198795	11.06	9.17604	12.5364	7.46569	8.87859	10.5704	11.3591	10.2339	13.3169	11.9786
chrIII:13663301-13667737:-	flp-15	ZK525.1	WBGene00001458	0.12778	0.298344	0.957235	0.057175	0.0850601	0.839453	0.62471	0.699819	-0.540304	-0.406558	0.0349009	-0.641953	-0.562514	-0.157889	0.223128	-0.237394	6.53395	7.28392	8.55019	5.56938	6.1396	7.22837	10.084	6.71007	9.24305	11.5538
chrII:13235236-13237282:+	flp-16	F15D4.8	WBGene00001459	0.60118	0.883499	0.282399	0.744054	0.437619	0.903052	0.767784	0.576087	0.183076	-0.0659156	0.315332	-0.121559	-0.239979	0.081578	-0.116248	-0.236224	14.9617	12.1105	18.1602	11.003	10.2098	15.1579	12.992	11.8282	15.882	14.0813
chrIV:17190168-17191855:-	flp-17	C52D10.11	WBGene00001460	0.801433	0.251249	0.83875	0.00568144	0.61269	0.64802	0.490777	0.904934	-0.0939138	-0.339353	0.092523	-0.682207	-0.160086	-0.233961	-0.245856	-0.0768011	14.3619	11.6954	13.1364	8.43518	13.0281	10.1307	10.015	11.4849	13.6367	16.8397
chrX:3012172-3018545:-	flp-18	Y48D7A.2	WBGene00001461	0.974794	0.728857	0.559198	0.508987	0.986531	0.962873	0.937652	0.942535	0.0126244	-0.115828	-0.178152	-0.185599	-0.00597999	0.0333438	-0.0334372	-0.0399678	10.8095	9.66584	11.0432	8.69063	10.1873	12.9623	12.3199	12.2496	14.0913	11.6599
chrX:10604748-10605768:+	flp-19	M79.4	WBGene00001462	0.833173	0.5899	0.772485	0.181028	0.86309	0.668355	0.638428	0.606524	-0.103183	-0.237241	-0.1508	-0.473132	-0.0816362	-0.272649	-0.220574	-0.29432	6.35742	5.56768	6.55404	4.25433	6.18487	5.85734	6.16415	5.76293	8.37121	7.583
chrX:9349276-9349831:-	flp-20	E01H11.3	WBGene00001463	0.732667	0.419615	0.748058	0.656868	0.552279	0.958439	0.902687	0.823768	-0.174547	-0.36854	0.183394	-0.214432	-0.264309	-0.0611609	0.0813642	-0.178041	4.47866	3.60084	5.82115	4.01622	3.91196	4.53313	5.25435	4.01776	5.38991	5.81354
chrV:7793346-7794002:+	flp-21	C26F1.10	WBGene00001464	0.339746	0.513186	0.464965	0.885172	0.655924	0.957895	0.742782	0.815004	0.430468	0.327876	0.364639	0.0853993	0.221371	0.0644986	0.192343	0.192033	4.33896	3.82648	4.51835	2.73474	3.26771	3.26657	3.76555	3.75609	3.35939	2.83078
chrX:13452602-13456474:-	flr-1	F02D10.5	WBGene00001465	0.302322	0.219423	0.59944	0.232628	0.835877	0.376004	0.606013	0.856072	-0.299205	-0.353471	0.200591	-0.332974	-0.0739803	-0.36679	-0.198996	-0.110585	3.38989	3.20477	4.36989	3.07771	3.8636	2.7667	3.1694	3.41013	4.15466	4.66772
chrV:11936840-11937769:-	flr-2	F58H1.4	WBGene00001466	0.974616	0.298344	0.724573	0.328257	0.709574	0.954281	0.630944	0.884875	-0.0221307	-0.477674	0.212932	-0.436375	-0.194317	0.0715906	0.266239	0.132245	2.54214	1.29496	2.27012	1.32667	1.93306	1.83434	2.43721	2.0195	1.83154	2.85194
chrX:15089327-15093515:+	flr-4	F09B12.6	WBGene00001468	0.675197	0.509896	0.0180819	0.443827	0.954142	0.591865	0.832512	0.132806	-0.20402	-0.308405	0.89819	-0.331035	0.0331634	-0.359462	-0.131134	-0.684972	1.04715	0.92776	2.63655	0.860539	1.2561	0.752437	0.956777	0.492435	1.22991	1.39268
chrIII:7650487-7655967:-	flt-1	ZK783.4	WBGene00001470	0.00212951	0.951568	0.176887	0.00916694	0.742594	0.867777	0.0440623	0.182113	0.346582	-0.0128207	-0.22489	0.300747	-0.0535036	0.0612789	-0.310329	-0.245602	18.2433	13.9455	12.071	16.4952	13.1334	14.8258	11.3517	11.8972	15.8287	15.5394
chrV:13019053-13033384:+	fmi-1	F15B9.7	WBGene00001475	0.642094	0.997095	0.246274	0.787204	0.966719	0.80784	0.70412	0.818012	-0.143651	0.00134883	0.334452	-0.0881902	0.0160387	-0.140366	0.14065	-0.123876	1.10901	1.22408	1.52264	1.08353	1.19811	1.0561	1.3106	1.06435	1.30952	1.34922
chrIV:10661837-10664384:+	fmo-1	K08C7.2	WBGene00001476	0.768406	0.574931	0.105043	0.0308064	0.254508	0.99143	0.693277	0.0396838	0.0761163	-0.138417	0.389413	-0.394902	-0.221177	-0.00874794	0.128769	0.495091	12.6734	10.689	16.3366	8.36981	9.74485	12.1149	13.4151	17.7037	13.5724	13.0643
chrIV:10682504-10684365:+	fmo-2	K08C7.5	WBGene00001477	0.132275	0.113398	0.487006	0.489996	0.00316886	0.816807	0.138783	NA	-0.627839	-0.664455	-0.35931	-0.329296	-1.05948	0.213868	0.643235	0.325419	0.498143	0.465361	0.232412	0.696219	0.244929	0.636635	1.12919	0.752378	0.519969	1.18397
chrIII:10694548-10698769:+	fmo-3	Y39A1A.19	WBGene00001478	0.688983	0.752733	0.748294	0.998865	0.27554	0.85022	0.565202	0.179994	-0.1471	-0.12673	0.136826	0.00121359	0.308516	0.125479	0.214286	0.455067	3.66458	3.67877	4.77404	3.85885	5.02659	4.75354	5.08503	6.1476	4.76611	4.49714
chrV:13603283-13606689:-	fmo-4	F53F4.5	WBGene00001479	0.000148365	0.00011177	0.968387	0.255023	0.273102	0.835994	0.979112	0.0025366	-0.552693	-0.569791	0.01259	-0.199712	-0.184028	-0.0785378	0.00848092	0.472163	11.6446	11.3528	15.8929	14.0311	14.5458	14.8755	15.8374	22.1386	17.5582	18.9293
chrV:899313-903580:-	fmo-5	H24K24.5	WBGene00001480	3.58654e-13	0.181559	1.49996e-18	1.29931e-07	8.2709e-11	0.981396	3.25887e-12	0.896346	0.981097	0.245553	1.25838	0.742084	0.863923	-0.0149336	1.02962	-0.0534703	21.4686	12.4493	25.1962	16.8906	18.8565	10.0075	21.3715	9.70679	11.2433	11.4798
chrI:3211048-3217367:+	fog-1	Y54E10A.4	WBGene00001481	0.300284	0.000789947	0.560171	0.144144	0.0179836	0.921587	0.264947	0.61278	0.196185	0.511565	-0.163856	0.254953	0.359609	-0.0563774	0.266356	0.178214	10.7353	13.3126	8.61426	10.4733	11.5556	9.3288	11.8799	11.1167	10.8642	10.1375
chrV:20199224-20200610:+	fog-2	Y113G7B.5	WBGene00001482	0.418494	0.463571	0.761287	0.716638	0.00679875	0.373278	9.78511e-05	0.930164	0.12226	-0.118009	-0.0704151	-0.0622564	-0.3154	-0.196279	-0.549446	-0.0313057	54.6358	45.4837	38.4395	44.7183	38.2626	35.104	27.2102	39.5446	45.1098	54.5516
chrI:10016768-10018105:+	fog-3	C03C11.2	WBGene00001483	0.763457	0.00223539	0.293906	0.370027	0.224364	0.975839	3.26875e-05	0.00102968	0.161168	1.07611	-0.438822	-0.39664	0.480188	0.0360964	1.29	1.0757	1.45358	3.55959	1.48968	0.659349	1.93265	2.4011	7.23296	6.0304	2.57965	1.31525
chrX:2445492-2450496:-	fox-1	T07D1.4	WBGene00001484	0.0546453	0.0032782	0.921992	0.00168287	0.0037566	0.997079	0.77625	0.77926	0.443761	0.633342	-0.0467625	0.659634	0.593283	0.00449572	-0.11446	-0.145775	6.61843	7.54893	5.30827	7.27176	7.08205	5.49601	5.0316	4.90535	6.14055	5.12508
chrV:20075890-20087702:-	fre-1	Y113G7A.8	WBGene00001485	0.782077	0.81121	0.242647	0.96362	0.383325	2.30882e-05	9.89022e-13	0.983319	0.0516039	-0.0478012	-0.19429	-0.00967403	-0.126742	-0.577349	-0.908364	-0.00889712	34.0423	31.2941	27.9165	30.3899	28.6668	21.1711	16.6897	31.8668	35.7851	35.7395
chrII:5917399-5918296:+	frh-1	F59G1.7	WBGene00001486	0.891832	0.996328	0.0473242	0.446514	0.226181	0.975946	0.144359	0.606524	0.0391051	-0.00131517	-0.430796	-0.165844	-0.22894	-0.0212472	-0.335679	-0.182008	34.2783	32.871	21.7975	27.5421	26.9279	29.6028	23.4174	26.2847	33.5992	36.2822
chrIV:10043740-10045682:+	frk-1	T04B2.2	WBGene00001487	0.0388289	0.866663	0.928436	0.0804681	0.360053	0.98674	0.200609	0.93357	-0.664486	-0.0859803	0.0539333	-0.572526	0.314641	-0.0193519	0.459119	-0.0650199	1.58603	2.62938	5.78042	1.62123	3.55312	5.42393	8.16421	5.21747	6.1479	3.1256
chrI:14875773-14900319:-	frm-1	ZK270.2	WBGene00001488	0.913874	0.907423	0.461363	0.642169	0.347602	0.998549	0.672428	0.134677	-0.0406516	0.0445108	0.296224	-0.141467	0.244348	-0.00362918	0.188335	0.555189	21.5878	22.7542	28.0229	18.6577	25.7391	21.6771	25.557	34.9121	24.2533	24.2602
chrIII:5976651-5982077:-	frm-2	T04C9.6	WBGene00001489	0.267456	0.0431964	0.0327787	0.207877	0.427069	0.800568	0.00192061	0.922972	0.211558	0.34656	0.396716	-0.236842	0.151578	0.104929	0.537247	0.0424447	11.5344	12.5572	12.0039	7.77546	10.5558	9.7001	13.3025	9.26032	10.0083	10.768
chrX:11576180-11581660:+	frm-3	H05G16.1	WBGene00001490	0.00382643	0.012484	0.441086	0.173637	0.990833	0.470797	0.950639	0.193764	0.641517	0.576454	0.241661	0.34712	-0.00421655	-0.285781	0.0284923	-0.409255	3.0751	2.89007	2.61539	2.29118	1.79529	1.73638	2.21741	1.57333	2.41903	2.04411
chrI:5402898-5408462:-	frm-4	C24A11.8	WBGene00001491	0.514023	0.620788	0.510409	0.507798	0.308579	0.0507236	0.00196218	0.724928	0.0847293	0.070492	-0.106764	0.0838915	-0.114503	0.269416	0.360938	0.0815082	42.8823	41.9265	33.7236	40.0169	35.6281	44.0386	47.0128	38.5463	40.5796	43.9985
chrIV:32953-48844:-	frm-5.1	Y38C1AB.8	WBGene00001492	0.10563	0.665582	0.964539	0.0449728	2.6449e-06	0.952633	0.854555	0.149839	0.266006	0.0961772	0.0146881	0.312384	0.621462	0.0311817	-0.0516635	0.287256	6.55184	5.71685	6.54281	6.3296	8.08809	6.61046	6.23538	7.96971	7.21982	5.88563
chrV:12302465-12306953:+	frm-7	C51F7.1	WBGene00001493	0.450813	0.548856	0.727011	0.716934	0.357447	0.739657	0.957321	0.894012	-0.09663	-0.0835444	0.0583048	-0.0516282	-0.106848	0.0768176	0.0109993	0.0337794	26.0294	25.9336	28.0457	25.0884	24.7104	28.4169	27.125	27.5678	30.023	30.3525
chrIII:3200791-3219141:-	frm-8	H09G03.2	WBGene00001494	6.57337e-06	0.0870719	3.0331e-12	0.786866	0.951351	0.906592	0.223196	0.900514	0.851163	0.391361	1.14828	0.0838381	-0.0213385	-0.0632143	0.27644	-0.0585533	6.37797	4.47199	8.97136	3.35185	3.17494	3.68471	4.72442	3.67512	4.27901	3.66503
chrX:10816903-10838585:-	frm-9	F31B12.3	WBGene00001495	0.858527	0.931106	0.640432	0.676679	0.153847	0.975338	0.931224	0.762616	-0.0726013	-0.039499	0.177167	-0.144926	0.368723	0.0281519	0.043154	-0.160771	1.0017	1.01488	1.43976	0.884005	1.35087	1.27637	1.29614	1.10099	1.39625	1.15531
chrV:13463136-13467212:+	frm-10	F25H9.5	WBGene00001496	0.92546	0.000789947	0.43567	0.0458973	2.15925e-05	0.815738	0.555285	0.00215991	0.0149178	-0.311024	-0.114581	-0.196985	-0.365116	0.0622373	-0.0911247	0.344683	70.7106	55.5001	53.492	56.8845	51.7371	60.6367	54.3981	74.0721	64.7309	76.2194
chrI:6211988-6214588:-	fars-1	T08B2.9	WBGene00001497	0.60902	0.548962	0.129584	0.0983186	0.257524	1	0.145795	0.685074	-0.0599194	0.0705165	-0.159629	0.151695	-0.107678	4.51416e-05	-0.154382	-0.0714849	100.635	108.823	93.0462	109.059	93.0661	104.114	93.4057	99.0154	116.136	114.33
chrII:8464797-8467028:+	fars-3	F22B5.9	WBGene00001498	0.0762965	0.439477	0.664102	0.956538	0.00872205	0.854245	0.104492	0.982206	-0.162996	-0.0860384	-0.0682514	0.00809551	-0.215845	0.0484045	-0.189882	0.00712976	103.55	107.866	99.0888	109.046	95.4134	107.598	90.9407	104.503	115.997	126.464
chrIII:4937283-4939470:+	fsn-1	C26E6.5	WBGene00001499	0.125107	0.0833393	0.00802464	0.00116248	0.534726	0.591865	0.716857	0.951082	0.160237	0.179687	-0.352553	0.294946	-0.0736739	0.125617	0.0720271	0.020646	101.423	101.48	67.5458	104.133	82.2583	95.0657	91.4812	88.186	96.935	98.6932
chrV:7545955-7547993:-	ftn-1	C54F6.14	WBGene00001500	4.49474e-07	0.00497893	6.61195e-06	0.899725	0.000153923	0.257362	9.17909e-07	0.781542	1.59035	0.979297	1.39122	0.0728097	1.2058	0.528062	1.49483	0.194928	7.0626	4.03033	12.7559	1.45376	4.76343	5.99108	13.9776	4.37218	3.96165	1.5284
chrI:3680181-3680947:-	ftn-2	D1037.3	WBGene00001501	0.000310096	0.3757	2.26791e-05	0.0618423	2.35688e-13	0.00570606	0.0533931	0.3433	0.318603	0.104549	0.630623	0.182863	0.585842	-0.46533	-0.327353	-0.215784	273.693	232.232	449.499	232.471	315.812	203.261	224.638	243.63	317.666	238.185
chrX:11603640-11605345:-	ftt-2	F52D10.3	WBGene00001502	0.107629	0.000506422	0.0348877	0.886661	0.86977	0.997161	1.21477e-05	0.919482	0.163915	0.312019	0.238136	-0.0211625	0.0237214	-0.00191389	0.436288	-0.0266083	179.514	196.619	158.601	147.205	155.463	133.81	182.428	131.513	149.469	174.196
chrIII:7465236-7467569:+	fum-1	H14A12.2	WBGene00001503	0.0172885	0.1684	0.351254	0.000188346	2.07787e-10	0.00114014	0.00102387	0.108147	0.506117	0.332233	0.136797	0.738457	1.16901	0.387594	0.373987	0.224627	75.3648	65.1484	94.7677	83.931	118.785	113.194	112.125	100.86	95.8977	55.9299
chrII:8756237-8758669:-	fut-1	K08F8.3	WBGene00001505	0.990857	0.0975596	0.0756797	0.260782	0.74979	0.953596	0.867847	0.817696	0.00402233	-0.391947	0.453698	-0.276043	0.0921819	-0.0442776	-0.0693259	-0.120056	7.1539	5.22373	9.69745	5.39967	7.30123	6.61606	6.49347	6.25107	7.64392	7.77197
chrV:6573966-6575780:-	fut-2	EGAP9.2	WBGene00001506	0.980416	0.488099	0.000740998	0.498062	0.378192	0.715487	0.417071	0.929081	-0.0152382	-0.33672	1.27999	-0.314656	0.38318	0.295057	0.403326	0.0860476	0.608406	0.304273	2.60127	0.309929	1.02731	0.783513	0.913487	0.556889	0.509137	0.680118
chrII:2819440-2822495:-	fut-4	K12H6.3	WBGene00001507	0.874754	0.826446	0.977335	0.852542	0.372664	0.652227	0.928297	0.919886	-0.0944266	-0.130781	0.0221848	0.105178	-0.381599	-0.332362	-0.0654355	-0.0945621	1.30348	1.23416	1.67565	1.50934	0.900039	1.08226	1.51814	1.46664	1.82281	1.57609
chrV:5986950-5990235:-	fut-8	C10F3.6	WBGene00001508	0.119311	0.116404	0.368927	0.00205454	0.732199	0.390363	0.643772	0.198948	-0.338838	-0.348072	0.250219	-0.598181	-0.0921822	-0.294019	-0.149079	-0.371293	6.89088	6.76098	8.93194	5.28578	7.91722	5.89519	6.59395	5.57147	8.24178	9.6654
chrII:5833307-5836182:-	fzo-1	ZK1248.14	WBGene00001509	0.119383	0.165783	0.206125	2.98647e-05	0.017003	0.167473	0.524896	0.937421	0.156611	0.145752	-0.186106	0.352985	0.210741	0.225246	0.107647	0.0248963	48.7653	47.7762	44.6801	52.3008	48.4428	59.9196	55.1033	51.9444	56.9254	47.5788
chrII:9640108-9644407:-	fzr-1	ZK1307.6	WBGene00001510	0.184789	0.3611	0.519473	0.117987	0.0597581	0.180353	0.609519	0.860013	0.140696	0.107309	-0.124443	0.158566	0.176489	0.247298	0.102028	0.0562716	42.7408	41.2182	32.7457	40.415	41.9117	42.7599	38.5188	37.2673	39.9331	42.1618
chrII:5501616-5503889:+	fzy-1	ZK177.6	WBGene00001511	0.612007	0.0981566	0.00138742	0.106542	0.315149	0.107716	0.767784	0.928139	-0.06521	0.171451	-0.401057	0.163165	-0.107141	0.250445	0.0593327	0.0284424	83.9132	97.853	56.7872	92.0723	77.9015	90.3122	78.8272	77.0951	84.2805	95.7011
chrIII:12771777-12779625:-	gab-1	ZC482.1	WBGene00001512	0.960977	0.880589	0.199698	0.736245	0.737108	0.98089	0.742954	0.991536	0.031604	-0.0969017	0.571445	-0.178932	-0.176236	-0.0338892	0.195666	-0.0137966	0.841349	0.707273	1.21092	0.604579	0.623862	0.604278	0.797879	0.618923	0.698187	0.881777
chrV:6431308-6433479:-	gad-1	T05H4.14	WBGene00001513	0.525039	0.73092	0.107766	0.985614	0.0422908	0.581973	2.394e-05	0.966839	-0.0769368	-0.0479687	-0.258856	0.00354437	-0.186012	-0.143049	-0.578619	-0.0171736	74.5014	75.023	57.9209	73.6379	65.9819	62.9383	46.0085	68.9075	77.8256	85.6754
chrIII:5604418-5607511:+	xnd-1	C05D2.5	WBGene00001514	0.114086	1.01754e-07	0.549204	0.252211	0.669152	0.448708	0.853009	0.521366	0.166607	0.465559	-0.10342	0.126893	0.0551768	0.150431	0.039674	0.130028	74.8627	91.1783	54.9908	67.9641	66.1704	65.894	60.8945	64.9226	66.0238	72.5134
chrX:2192497-2195341:+	gap-1	T24C12.2	WBGene00001515	0.982801	0.820102	0.910631	0.658206	0.970822	0.500333	0.741025	0.502328	-0.0104423	-0.110045	0.0659619	-0.182141	-0.0191062	-0.35838	-0.163402	-0.343608	2.30783	2.08943	2.86731	1.86808	2.18873	1.97509	2.34656	1.99611	3.01632	2.53781
chrX:9472410-9516378:+	gap-2	ZK899.8	WBGene00001516	0.0394118	0.962163	0.757596	0.497471	0.0290129	0.958497	0.0279012	0.98764	0.257958	0.0108236	-0.0698361	0.104358	0.256613	0.0238592	-0.331002	-0.00720049	9.17272	7.59342	7.60352	7.68152	8.76106	8.127	6.29624	7.94745	8.91023	8.31439
chrX:6479601-6484773:-	gar-1	C15B12.5	WBGene00001517	0.0400932	0.22419	0.905256	0.00164834	0.27938	0.639615	0.999938	0.752988	-0.746803	-0.497521	0.0775198	-1.07068	-0.417739	-0.314346	-0.000248604	-0.222867	0.751064	0.960318	1.44715	0.48202	1.00274	0.993611	1.34661	1.08554	1.50278	1.70561
chrIII:6309326-6320819:+	gar-2	F47D12.1	WBGene00001518	0.79406	0.534668	0.904912	0.498062	0.718647	0.252663	0.475161	0.119478	0.113141	0.242143	0.0607663	-0.250767	0.141507	-0.441218	-0.261427	-0.52614	2.10642	2.31762	2.81264	1.44479	2.06056	1.86735	2.17125	1.74544	2.9952	2.08935
chrV:14564737-14579704:-	gar-3	Y40H4A.1	WBGene00001519	0.268712	0.25193	0.803969	0.043866	0.318555	0.921682	0.820606	0.03107	-0.363837	-0.383862	0.116632	-0.590004	-0.312553	-0.0794947	-0.108414	-0.691324	2.04518	1.98487	3.06773	1.58444	2.04025	2.61203	2.55219	1.55656	3.1109	3.00545
chrX:15586745-15590329:-	gas-1	K09A9.5	WBGene00001520	3.27585e-12	0.05055	0.424604	0.216558	0.824976	0.350029	0.349526	0.937623	0.597219	-0.205401	-0.133114	0.137393	-0.0321043	-0.179014	-0.14907	-0.0252758	165.514	92.6884	103.66	111.884	101.594	100.296	102.485	111.935	127.127	118.358
chrII:10690392-10693752:-	gbh-1	D2089.5	WBGene00001522	0.832711	0.878728	0.779659	0.573365	0.741929	0.839453	0.911618	0.821443	-0.0703205	0.0552599	-0.105557	0.154465	-0.0960261	0.113654	-0.0481413	0.114955	7.97722	8.66363	7.54622	8.83317	7.48686	8.91641	7.87474	8.91931	9.11704	9.17049
chrII:8485887-8487512:+	gbh-2	M05D6.7	WBGene00001523	0.351646	5.59993e-07	0.680801	0.00217046	0.00169658	0.766435	0.257645	0.604775	-0.210942	-0.888185	0.137106	-0.561194	-0.547616	-0.147708	-0.303658	0.20154	14.842	8.83054	16.5873	10.6792	11.0602	13.3759	11.8549	17.4527	16.7012	18.903
chrV:8947777-8956256:+	gck-1	T19A5.2	WBGene00001526	0.761449	0.712745	0.639881	0.401531	0.767914	0.370798	0.0836522	0.11853	0.0466388	-0.057882	0.0757934	-0.107472	0.0433386	0.149783	0.209133	0.208433	29.3024	26.8694	25.8686	24.5302	27.9483	27.255	28.4272	28.4097	27.3443	30.8766
chrII:9035500-9038240:-	gcs-1	F37B12.2	WBGene00001527	0.896789	0.669833	0.721141	0.668889	0.461061	0.633936	0.0615924	0.134899	0.0198917	0.0572843	-0.0602662	-0.0539395	-0.0814598	0.0976249	0.218104	0.19841	78.2878	79.3329	64.3306	69.3959	69.7066	71.9176	78.3544	77.2639	74.9024	84.0936
chrII:9512431-9516877:-	gcy-1	AH6.1	WBGene00001528	NA	NA	0.851636	NA	NA	NA	3.39376e-06	NA	0.229067	0.482917	0.10375	0.0515099	0.257009	0.0644543	1.4234	-0.0308396	0.0453144	0.10602	0.0429236	0.00916574	0.048125	0.0343505	0.577113	0.0157236	0.0212043	0
chrII:9507545-9512036:-	gcy-2	R134.2	WBGene00001529	NA	NA	0.921992	NA	NA	NA	0.406201	NA	0.124237	0.218172	-0.0646527	-0.0446629	0.290667	-0.421441	0.367418	-0.161715	0.0461019	0.0682072	0.131679	0.00932137	0.0801192	0.0309802	0.317298	0.100886	0.173495	0.0203492
chrII:9502698-9507222:-	gcy-3	R134.1	WBGene00001530	NA	NA	0.941261	0.811081	0.923085	NA	0.901694	NA	0.0583584	-0.1812	0.0509085	0.107151	0.0470488	-0.0412828	-0.0771864	-0.189482	0.090355	0.0284076	0.12683	0.0995936	0.0824587	0.101382	0.0920134	0.0639409	0.126411	0.0808229
chrII:10304079-10308766:-	gcy-4	ZK970.5	WBGene00001531	NA	NA	0.62334	0.936589	0.928511	NA	0.889927	NA	0.0638232	-0.202689	0.246061	-0.0430025	0.0469451	0.0431077	-0.0855592	-0.0889634	0.099733	0.0378882	0.168368	0.0685511	0.0897347	0.10563	0.0735657	0.0738589	0.106597	0.0914538
chrII:10310340-10316159:-	gcy-5	ZK970.6	WBGene00001532	NA	NA	0.569416	NA	NA	NA	NA	NA	-0.17523	0.0093245	-0.232696	-0.0447799	0.0951796	-0.0339573	-0.00899108	0.125046	0.0183823	0.0580963	0.0232815	0.0425211	0.0739332	0.073558	0.0832162	0.125659	0.0959616	0.0615045
chrV:10308266-10314028:-	gcy-6	B0024.6	WBGene00001533	NA	NA	NA	NA	NA	NA	NA	NA	-0.135513	-0.0807774	0.00699168	-0.0401171	0.118154	0.0324339	0.114323	-0.0301976	0.028468	0.0396309	0.0413001	0.0469665	0.0812666	0.0478384	0.0675296	0.0335587	0.0449027	0.0642381
chrV:8387336-8392304:+	gcy-7	F52E1.4	WBGene00001534	0.942587	0.682735	0.565667	0.936878	0.837756	0.89089	0.96672	NA	-0.0448265	-0.226746	0.310883	-0.0509797	-0.116578	-0.140742	0.0321477	-0.00260521	0.301711	0.229579	0.375827	0.279401	0.262015	0.190884	0.25168	0.238052	0.265295	0.348986
chrIV:7928147-7933763:+	gcy-8	C49H3.1	WBGene00001535	0.978763	0.715321	0.942095	0.133811	0.940261	0.85407	0.920921	0.977397	0.017571	0.205433	0.0561266	-0.617764	-0.0459211	-0.176177	0.07151	0.0319881	0.331285	0.411333	0.445261	0.116661	0.291422	0.33598	0.455927	0.434876	0.468235	0.353551
chrX:11332524-11338237:-	gcy-9	ZK455.2	WBGene00001536	0.941159	0.962346	0.617211	0.746226	0.37389	0.950752	0.316494	0.98764	-0.0444368	-0.0313989	-0.270834	-0.164786	0.363252	-0.0750673	-0.462914	-0.0190229	0.479646	0.479539	0.45405	0.392862	0.683066	0.557194	0.359083	0.597129	0.682765	0.54695
chrX:17046188-17055480:-	gcy-11	C30G4.3	WBGene00001537	0.86489	0.665053	0.785935	0.633314	0.932198	0.594448	0.772217	0.994123	-0.068322	0.155509	0.111381	-0.159404	-0.0338598	-0.245884	-0.118485	0.0071875	2.22268	2.61426	2.61096	1.93807	2.18374	1.96271	2.1771	2.40134	2.66577	2.55583
chrII:5312103-5319066:+	gcy-12	F08B1.2	WBGene00001538	2.06274e-08	0.959559	0.995286	6.92622e-07	0.149454	0.452072	0.303217	0.682485	-0.579116	0.0107528	-0.0020128	-0.518556	-0.171206	-0.161959	0.167276	-0.103009	11.4342	17.1682	17.0946	11.1546	14.6077	15.2387	19.2862	15.8966	19.0828	18.787
chrV:12363735-12369518:-	gcy-13	F23H12.6	WBGene00001539	NA	NA	NA	NA	NA	NA	NA	NA	-0.0493603	0.182058	-0.0126239	-0.00223871	0.140874	0.0643447	0.120664	-0.0989064	0	0.0534426	0.0182197	0.0090672	0.0394906	0.0364387	0.0501746	0	0.0234504	0.0114325
chrV:14863153-14867977:-	gcy-14	ZC412.2	WBGene00001540	NA	NA	NA	NA	NA	NA	NA	NA	-0.0932065	0.0451806	0.0220902	-0.0923439	0.18273	0.157735	0.515422	-0.0637197	0	0.0284076	0.0240693	0	0.0545752	0.0519306	0.147373	0.0084471	0.0211486	0.0206206
chrII:3192423-3197069:-	gcy-15	ZC239.7	WBGene00001541	0.891832	0.902785	0.817761	0.736245	0.30803	0.890265	0.678172	0.961157	0.0828158	0.0760305	-0.139642	-0.175453	0.422359	-0.132426	-0.222653	-0.0476709	0.545189	0.534586	0.614947	0.380717	0.741649	0.623805	0.561738	0.673521	0.788478	0.541359
chrI:2223309-2233193:-	gcy-17	W03F11.2	WBGene00001542	NA	NA	0.775213	NA	0.267735	NA	NA	NA	0.0775028	0.0946618	0.142453	0.0426027	0.397611	0.0478223	0.102651	0.0648505	0.0602258	0.0629975	0.081525	0.0494706	0.12568	0.0578585	0.0705214	0.0608817	0.050113	0.048137
chrIV:12860113-12865911:+	gcy-18	ZK896.8	WBGene00001543	0.00309632	5.19965e-06	0.736549	0.00868721	0.530348	0.795411	0.00689726	0.432869	0.898797	1.30526	0.18245	0.810698	0.246154	-0.208797	0.927658	-0.420253	1.18132	1.63558	0.9454	1.0246	0.641908	0.654801	1.85685	0.522183	0.885911	0.569245
chrII:3250989-3259358:-	gcy-19	C17F4.6	WBGene00001544	5.29798e-53	6.42376e-58	5.88868e-34	3.74183e-11	0.293105	0.878964	2.10184e-34	0.386704	3.17934	3.3201	2.87822	1.52462	0.319462	0.120916	2.89348	0.387949	6.22695	6.82269	4.6212	1.68541	0.657678	0.482885	4.68134	0.622104	0.460771	0.524798
chrV:16248511-16253767:-	gcy-20	F21H7.9	WBGene00001545	NA	NA	NA	NA	NA	NA	NA	NA	0.139345	0.192329	0.194418	0.0938992	0.133301	0.0212166	-0.00395366	0.0262922	0.0274738	0.0386163	0.0588433	0.0165673	0.0247013	0.0243395	0.0185656	0.0244435	0.0214239	0
chrII:2659675-2665027:+	gcy-21	F22E5.3	WBGene00001546	0.25812	0.530572	0.856388	0.624845	0.144667	0.261647	0.441395	0.764695	0.453445	0.292464	-0.107343	0.225243	0.525481	-0.53905	-0.342641	-0.20752	0.994344	0.839401	0.95957	0.750854	1.01268	0.634852	0.767037	0.871437	1.18204	0.692246
chrV:20820306-20824997:-	gcy-22	T03D8.5	WBGene00001547	0.941786	0.759308	0.591211	0.749649	0.825658	0.665553	0.651193	0.844489	-0.0452478	-0.176152	0.285204	-0.169396	0.120852	0.315751	-0.247392	0.162574	0.419433	0.353191	0.722347	0.338482	0.47978	0.740424	0.398108	0.633805	0.59346	0.481361
chrIV:3282882-3289334:-	gcy-23	T26C12.4	WBGene00001548	0.965874	0.784952	0.173347	0.58072	0.889032	0.805854	0.853771	0.504056	-0.0275634	0.154566	0.588063	-0.262489	-0.0789216	-0.218986	0.120102	0.405075	0.545515	0.652269	0.757146	0.395702	0.494217	0.304643	0.459537	0.626377	0.44426	0.61212
chrIV:15872901-15882345:+	gcy-25	Y105C5B.2	WBGene00001549	NA	NA	0.689105	NA	NA	NA	NA	NA	0.0350804	0.00771249	-0.173827	-0.0435436	0.113333	0.074282	-0.040558	-0.103634	0.0494612	0.0421004	0.033423	0.0289467	0.0643731	0.103955	0.0699643	0.0521301	0.0914913	0.0447531
chrIV:17432940-17440054:-	gcy-27	C06A12.4	WBGene00001550	NA	NA	0.99824	0.998865	0.89376	NA	NA	NA	-0.0111432	0.0104277	0.00120691	-0.00210191	-0.0691561	-0.145244	0.142503	0.0339847	0.118613	0.124773	0.0846812	0.114319	0.0964944	0.0406793	0.133589	0.0949822	0.0931939	0.133825
chrX:2420455-2427497:-	gcy-31	T07D1.1	WBGene00001551	0.790407	0.938326	0.996726	0.622283	0.923085	0.969524	0.411199	NA	-0.145164	0.05048	0.00408616	-0.23817	0.0567257	0.0479961	0.396596	0.00311697	0.205293	0.29418	0.248665	0.155383	0.283961	0.269466	0.476542	0.248688	0.27538	0.296904
chrV:13912066-13915422:-	gcy-32	C06B3.8	WBGene00001552	0.957662	0.604569	0.615194	0.152531	0.653679	0.943531	0.913643	NA	0.0333991	-0.266213	0.27638	-0.570904	-0.220198	-0.0843754	-0.0766066	0.00418108	0.383084	0.223496	0.524127	0.0943775	0.238128	0.299976	0.298749	0.346537	0.383592	0.396727
chrV:11995849-12001757:-	gcy-33	F57F5.2	WBGene00001553	0.477961	0.983758	0.913346	0.287518	0.679098	0.996201	0.808759	NA	-0.343207	-0.0139268	-0.0767041	-0.468202	-0.212451	0.00819384	0.149776	0.0769106	0.272024	0.424176	0.176598	0.207286	0.314959	0.208777	0.265608	0.233793	0.227352	0.475575
chrV:13383006-13385885:-	gcy-34	M04G12.3	WBGene00001554	NA	NA	0.903081	0.392354	0.933279	NA	0.64314	NA	-0.248605	0.0438771	0.0769584	-0.356988	0.0483991	-0.128329	0.229032	-0.0349446	0.125737	0.249069	0.213254	0.0803283	0.237016	0.119597	0.297808	0.159472	0.196926	0.250942
chrI:13325351-13333497:+	gcy-35	T04D3.4	WBGene00001555	0.959031	0.00400912	0.24693	0.0162997	0.511377	0.981765	0.968157	0.962901	-0.0307744	0.972976	0.513474	0.825761	0.279726	0.0314509	-0.0299943	0.0482398	0.717993	1.87751	1.25204	1.55486	0.953681	0.759812	0.699835	0.76478	0.80758	0.809284
chrX:15478949-15485632:+	gcy-36	C46E1.2	WBGene00001556	NA	NA	0.929426	0.451928	0.992664	NA	0.805101	NA	0.146621	-0.131353	-0.0617871	-0.316904	-0.00510341	0.148582	0.145945	0.00394572	0.23834	0.125948	0.14277	0.0613243	0.165633	0.228286	0.228544	0.168849	0.184529	0.192999
chrIV:2150650-2159162:-	gcy-37	C54E4.3	WBGene00001557	0.614383	0.887836	0.547445	0.234872	0.36834	0.867777	0.806535	0.843637	0.25545	0.0899232	0.323778	0.50287	0.386571	0.165951	0.156327	-0.169583	0.640171	0.518053	0.637798	0.783934	0.705083	0.521466	0.511749	0.309869	0.452997	0.510577
chrIV:14790788-14792853:-	gdi-1	Y57G11C.10	WBGene00001558	0.00296041	0.013141	0.643603	0.000104641	3.12851e-08	0.0217435	0.0240189	0.0168691	0.245505	0.21345	0.0640666	0.307127	0.412221	0.240775	0.221538	0.240743	165.573	159.729	158.997	161.501	177.939	180.036	177.641	180.064	169.523	151.801
chrIII:3344867-3363419:+	gei-1	F45H7.2	WBGene00001559	0.00357147	0.865862	9.91952e-06	0.747425	2.32378e-06	0.733447	0.111611	0.0172255	0.480476	-0.04903	0.75359	0.0786749	0.702802	0.13439	0.324738	0.466285	5.72336	3.83593	7.79985	3.98316	6.42532	4.94594	5.68764	6.30827	4.98912	4.38477
chrX:12795146-12813877:-	gei-3	T22H6.6	WBGene00001560	0.14405	0.37361	0.00721373	0.755562	9.47297e-11	0.868894	0.297713	0.820999	0.212085	0.146981	0.370045	0.0587527	0.725721	0.0572621	0.172076	0.067712	11.1615	10.5155	15.1629	9.34129	15.3919	12.1181	13.1576	12.209	12.9691	10.4417
chrIII:344298-348608:-	gei-4	W07B3.2	WBGene00001561	1.88959e-11	8.79892e-08	0.622849	6.75742e-18	6.135e-15	0.0285788	0.347031	0.00265335	0.86856	0.716361	0.0895713	1.09132	0.978069	0.309865	0.147236	0.381337	26.3857	23.3134	26.0291	28.9275	27.2829	30.426	27.1159	32.037	27.2263	15.3462
chrIV:13888064-13893955:+	lin-66	B0513.1	WBGene00001562	1.6465e-05	0.00149785	0.387794	0.000279191	1.1808e-13	0.199389	0.266262	0.121577	0.641612	0.502173	0.287317	0.553796	1.00375	0.444942	0.346858	0.487132	6.847	6.10939	5.18732	6.00683	8.49531	5.86833	5.43546	6.06828	4.59068	4.66978
chrV:7226357-7230830:-	gei-6	C05C8.4	WBGene00001563	0.100953	0.000273857	0.172328	0.00031403	0.0393174	0.0065331	0.00368746	0.672281	0.173009	0.337048	-0.184711	0.329487	0.19797	0.338821	0.337963	0.0921788	42.4088	46.9709	34.0342	44.2241	41.2754	49.3175	49.3049	41.4074	43.2648	40.8857
chrV:724208-728104:-	icl-1	C05E4.9	WBGene00001564	0.0168915	0.00355541	0.0209427	0.489503	0.00639098	5.64087e-05	0.000240207	4.215e-10	0.279392	-0.334067	0.308596	0.101187	0.303093	0.503516	0.450885	0.715396	183.645	117.062	214.492	151.267	178.564	246.491	237.408	286.664	191.983	164.082
chrIII:8111100-8121166:-	gei-8	C14B9.6	WBGene00001565	0.389872	0.0647335	0.952877	0.275789	1.55364e-06	0.307448	0.0551869	0.145516	0.106005	0.199527	0.0167134	0.126966	0.423045	0.204197	0.284917	0.249192	13.9048	14.6604	12.4704	13.1862	16.6243	14.2516	15.1047	14.7201	13.7308	14.0532
chrIV:8496470-8498858:-	acdh-13	C28C12.9	WBGene00001566	0.00536995	0.0361665	0.0867166	0.794092	0.00998467	0.880206	0.0190992	0.291447	-0.280702	-0.225024	-0.245694	-0.0390298	-0.250466	-0.0508126	-0.317597	-0.190705	36.703	37.6813	35.6696	40.6528	35.8568	41.0366	33.8848	37.095	47.4245	48.7446
chrI:8962315-8966123:+	snpc-4	F32H2.1	WBGene00001568	0.377389	0.00416901	0.0317637	0.000246701	0.839812	0.739812	0.237347	0.947074	0.0965625	0.253359	-0.253308	0.308162	0.0270439	0.0801163	0.155279	0.0190131	58.4241	64.3884	48.8237	63.3056	53.2075	61.8223	65.2048	59.206	65.1583	59.4684
chrX:1986197-1989599:-	gei-12	F52D2.4	WBGene00001569	0.0886865	0.000111545	0.00589563	3.835e-05	0.855256	0.475273	0.941604	0.0386243	0.181267	0.360581	-0.442495	0.375797	-0.0272868	-0.184847	0.0226424	-0.36452	37.6857	42.2007	24.0987	40.3643	31.1076	29.0375	33.7675	25.5058	37.0501	36.1187
chrIII:9632104-9637032:-	gei-13	F58A4.11	WBGene00001570	0.976731	0.874515	1.72409e-05	0.982244	0.00908411	0.519455	0.0662836	0.261799	0.0157112	0.0800829	1.23488	0.012787	0.72214	0.34059	0.613485	-0.486416	1.366	1.42564	3.44306	1.27244	2.33972	1.6439	2.06379	0.767553	1.34545	1.46608
chrII:8273419-8275971:-	gei-14	K01C8.5	WBGene00001571	0.00149636	0.0151221	0.462234	0.000482166	0.236619	0.0244062	0.168209	0.737589	0.316386	0.256551	-0.114994	0.341717	0.133921	0.294164	0.185005	0.0778887	43.7703	41.4146	32.1053	41.6077	36.7961	42.9046	39.729	36.8189	38.8575	38.1252
chrX:6819967-6823229:-	gei-15	M03A8.4	WBGene00001572	0.708047	0.992656	0.186578	0.690695	0.816063	0.788883	0.883858	0.994432	-0.125656	-0.00388265	0.369848	-0.130303	0.0788025	0.14966	0.0641625	0.00676104	5.96506	6.47227	8.73576	5.56614	6.68165	7.36746	6.88906	6.57871	7.30078	7.16381
chrI:9100847-9107932:-	gei-17	W10D5.3	WBGene00001574	0.405279	0.106449	0.83658	0.746871	0.872309	0.915082	0.29807	0.806959	0.0865333	0.150282	-0.0497791	-0.0388656	0.0209012	-0.0422582	0.177393	0.0741219	53.2392	54.9614	42.088	45.5584	48.6198	42.3159	49.5448	45.9979	48.6565	54.5777
chrIV:13981062-13982498:-	gei-18	Y37A1B.15	WBGene00001575	NA	NA	0.791952	0.900681	0.570866	0.986488	0.593693	NA	-0.222055	0.111389	-0.163793	-0.0723352	-0.261552	-0.0239637	0.284086	0.146905	0.371924	0.713029	0.491752	0.480508	0.334519	0.648919	1.05915	0.859876	0.747112	0.647009
chrIV:11745617-11748662:+	gem-4	T12A7.1	WBGene00001577	0.340651	0.220764	0.378692	0.0627517	0.950211	0.272777	0.323663	0.657148	0.271742	0.338727	0.272699	0.456689	-0.0244546	0.374049	-0.303691	0.198104	4.73756	4.92096	4.79164	5.11464	3.60337	5.17061	3.03926	4.52017	4.31564	4.17242
chrV:1427650-1432137:-	ges-1	R12A1.4	WBGene00001578	0.0221223	0.698816	0.943775	0.0580609	0.00309537	0.118999	1.65993e-05	0.000310609	0.344664	-0.0866104	0.0239069	0.294196	0.408281	0.321651	0.664826	0.57772	18.7448	13.5436	14.5056	16.8802	18.7557	18.0087	23.1248	21.6962	15.8967	15.9252
chrIV:572723-583601:+	gex-2	F56A11.1	WBGene00001579	0.0161785	5.87556e-17	0.230078	5.58178e-07	7.33732e-06	0.754134	0.014373	0.947028	0.254548	0.75504	-0.187586	0.475443	0.418051	-0.0905794	0.329537	-0.0225687	20.3211	28.5527	16.0347	22.2002	21.814	17.1883	23.2053	18.0416	20.4542	18.4883
chrIV:12404407-12408665:+	gex-3	F28D1.10	WBGene00001580	0.78714	0.66645	0.154649	0.495218	0.173217	0.943751	0.600387	0.685854	-0.035318	0.0547648	-0.222036	0.0751203	-0.126524	0.029885	-0.100889	0.103697	52.8544	55.5847	41.4353	53.3299	47.4066	49.6337	45.1975	52.3214	54.1886	59.0167
chrV:6392519-6399904:-	gfi-1	F57F4.3	WBGene00001581	4.65744e-15	0.375157	4.35006e-21	2.84913e-06	3.58888e-46	0.187511	0.00561966	0.0720691	0.804178	0.131437	0.976455	0.504451	1.41018	0.209783	0.333926	0.250144	244.316	149.378	288.029	184.353	359.363	167.036	182.453	171.905	160.5	150.254
chrI:9737814-9744113:+	gfi-2	K02A11.1	WBGene00001582	0.708687	0.475649	0.144927	0.552455	0.707133	0.523094	0.328192	0.841094	0.0471932	0.0833786	-0.189438	0.0679984	-0.0455838	0.124617	0.13743	0.0507488	79.0747	80.1016	63.5585	74.9463	70.8393	79.3802	80.1365	75.3608	81.0943	83.3255
chrX:14480502-14484586:+	gfi-3	M163.4	WBGene00001583	1.03813e-14	4.26076e-05	0.930841	3.25338e-09	0.0428571	0.890265	0.10589	0.820447	1.06087	0.616385	-0.0347682	0.839461	0.32088	0.0750215	0.364845	0.102141	14.8289	10.6195	6.70975	11.8165	8.30872	7.26358	9.04154	7.42308	7.66963	7.47346
chrIV:7646189-7654219:-	nrde-4	F45E4.10	WBGene00001584	0.499254	0.628534	0.0513331	0.423484	0.00636827	0.289895	0.82535	0.961006	-0.0795073	0.0628288	-0.26205	0.0889043	-0.236217	0.18821	0.0460378	-0.0165504	58.6037	63.9297	44.7795	61.608	50.1966	61.7137	55.7676	53.335	60.2019	67.5052
chrIV:11521266-11522193:+	gfl-1	M04B2.3	WBGene00001585	0.0132424	0.296905	0.41101	0.158868	0.395097	0.977252	0.772288	0.32649	0.37606	0.193864	-0.194841	0.237018	-0.151258	0.0180948	-0.0850964	-0.25628	42.8287	37.0843	27.2645	36.1695	27.9836	31.9152	29.559	26.0648	35.0926	35.5394
chrII:10694995-10702465:+	ggr-1	C09G5.1	WBGene00001586	0.88081	0.881556	0.797789	0.702054	0.753953	0.92188	0.81638	NA	-0.0930651	-0.0967064	0.162319	-0.202306	-0.167437	-0.107327	-0.148186	-0.274057	0.558087	0.548492	0.665451	0.448575	0.483612	0.445747	0.412614	0.330276	0.586181	0.688711
chrX:6070462-6081798:+	ggr-2	C45B2.4	WBGene00001587	0.91502	0.902785	0.799066	0.959245	0.65342	0.696216	0.587605	NA	0.0659284	0.0771079	0.161264	-0.0332232	0.225238	-0.304464	-0.290285	-0.388997	0.323457	0.325224	0.516937	0.255357	0.388662	0.252402	0.256163	0.213155	0.461631	0.315301
chrII:5130376-5133207:+	ggr-3	F09C12.1	WBGene00001588	0.968441	0.778745	0.534569	0.370899	0.797079	0.427006	0.810483	0.78716	0.0260752	-0.162168	-0.320805	-0.397588	-0.137383	-0.469087	-0.14748	-0.211769	1.24839	0.999134	1.20246	0.713841	0.996227	1.01128	1.44958	1.35195	1.89119	1.32229
chrIII:2347581-2362048:+	gip-1	H04J21.3	WBGene00001589	0.341818	0.398469	0.974427	0.0802918	0.0131599	0.961022	0.102893	0.592237	0.119742	0.111801	0.00934483	0.192604	0.246539	-0.0226925	-0.257539	0.131572	23.5606	23.1212	21.0683	23.1664	24.6373	20.5851	17.3908	22.9945	23.3386	23.5793
chrI:9226936-9228154:+	C45G3.3	C45G3.3	WBGene00001590	0.409882	0.87007	0.305864	0.637276	0.79824	0.841985	0.741638	0.647717	0.15952	-0.0439371	-0.220691	0.0996204	-0.057619	0.0841844	0.0896501	-0.14639	26.623	22.6769	18.3444	23.789	21.7528	22.9461	23.0283	19.3675	24.0632	25.8248
chrV:16219589-16221896:+	glc-1	F11A5.10	WBGene00001591	0.561298	0.214246	0.819482	2.83244e-06	0.911833	0.826687	0.0659814	1.92885e-07	-0.158416	-0.300506	0.0816865	-0.909914	-0.0356509	-0.11313	-0.430328	0.997846	10.2471	9.08568	11.9734	5.40819	10.7373	10.3692	8.108	23.7552	12.5664	12.582
chrI:4885188-4887966:-	glc-2	F25F8.2	WBGene00001592	0.746645	0.738929	0.288907	0.82297	0.372599	0.952672	0.961655	0.865419	-0.119747	-0.129827	0.313506	-0.0855983	0.256721	-0.0472518	0.0232146	-0.0955869	5.05127	4.94788	8.22988	4.86839	6.49332	6.2301	6.56711	5.97888	7.19137	6.05229
chrV:5449271-5453699:-	glc-3	ZC317.3	WBGene00001593	0.976683	0.975671	0.78982	0.365002	0.303111	0.97411	0.953151	NA	-0.0198213	0.0222313	0.161977	-0.402537	-0.436781	-0.0417692	-0.0413133	-0.0549351	0.443217	0.467169	0.415852	0.210663	0.206768	0.281091	0.284064	0.275085	0.344073	0.49794
chrII:7172163-7174897:-	glc-4	C27H5.8	WBGene00001594	0.960625	0.0512281	0.847433	0.399686	0.937021	0.872457	0.540371	0.342456	-0.0264146	0.631304	-0.10477	-0.320121	0.0392002	-0.12978	0.26099	-0.434276	2.18916	3.79479	2.49274	1.57723	2.2182	2.43778	3.41472	1.85871	3.05152	2.44139
chrI:7695657-7698150:+	gld-1	T23G11.3	WBGene00001595	0.0688038	0.335508	0.208578	0.992987	0.954048	0.430718	0.750345	0.321085	-0.155727	0.095639	-0.221733	0.0018969	0.00779745	0.187778	0.0751221	0.211655	230.526	271.42	165.439	240.445	247.161	222.289	204.957	226.147	216.542	280.045
chrI:6369967-6386101:+	gld-2	ZC308.1	WBGene00001596	0.00654477	0.0453787	0.159028	0.00596716	0.0055132	0.874798	0.259259	0.900471	0.243822	0.192521	-0.215481	0.244711	0.239282	-0.0542365	-0.180411	-0.0401441	35.3426	33.6465	28.9727	33.0296	33.6913	32.5098	29.7097	32.8403	37.7013	32.4274
chrII:7132601-7137175:+	gld-3	T07F8.3	WBGene00001597	0.00377382	4.67512e-05	0.0339136	6.49889e-08	0.000453653	0.0152902	0.120667	0.350131	0.25359	0.342534	-0.26941	0.435349	0.289464	0.318596	0.207191	0.16163	76.6223	80.5039	56.5751	81.2996	75.1405	85.9063	79.3806	76.85	76.4213	69.8369
chrI:6854687-6857536:+	glh-1	T21G5.3	WBGene00001598	3.37932e-05	0.00331528	5.83997e-20	2.68519e-08	2.65277e-17	5.91048e-16	2.22414e-23	4.63681e-31	1.01027	0.756979	1.07073	1.31003	1.90586	0.96153	1.15772	1.334	95.097	76.4202	149.256	112.906	185.805	137.977	158.816	180.151	77.2968	45.6108
chrI:6514022-6517508:+	glh-2	C55B7.1	WBGene00001599	0.00136678	0.00823799	0.608429	1.42122e-07	3.44729e-12	5.69665e-05	1.92544e-06	1.35926e-10	0.804182	0.691438	0.110646	1.23969	1.57479	0.589143	0.661425	0.857866	25.1456	22.6292	23.5094	33.258	44.394	33.157	34.961	40.2663	24.1896	14.2693
chrI:5792327-5795117:-	glh-3	B0414.6	WBGene00001600	0.256791	0.0134824	0.502017	0.0303425	0.817966	0.350901	0.147288	0.784849	0.136158	0.257379	-0.123686	0.226693	-0.034661	0.188193	0.221934	0.0775381	37.7471	40.5794	29.0546	37.5679	31.9973	36.3094	37.2167	33.5594	35.4197	37.347
chrI:3726014-3731227:+	glh-4	T12F5.3	WBGene00001601	0.00265846	0.000957116	9.80032e-05	2.14533e-05	4.70618e-12	1.57797e-19	3.14966e-31	7.5583e-33	0.878522	0.959869	0.715746	1.18015	1.80609	1.49489	1.8777	1.92742	18.0931	19.1398	15.4892	21.8818	38.006	27.5306	36.5475	37.903	10.1054	9.0908
chrX:6058219-6060199:+	gln-1	C45B2.5	WBGene00001602	0.645811	0.370418	0.843653	0.336607	0.00374284	0.320733	0.227798	0.0234321	0.097929	-0.176011	-0.060275	-0.177653	-0.425828	-0.258253	-0.254647	-0.441536	23.4384	18.9654	19.2141	17.9642	15.3349	16.5889	16.6624	14.5123	22.4049	23.7847
chrIII:9943152-9944673:-	gln-2	K03H1.1	WBGene00001603	2.09549e-10	0.982529	0.95883	0.000590345	1.45834e-06	0.482861	0.0891073	0.550825	-1.23801	0.00832176	-0.025726	-0.692352	0.854759	-0.282862	0.452096	-0.243637	4.61822	11.9574	28.9933	6.65857	21.6525	23.7226	42.0131	24.4689	32.9909	13.1072
chrIV:16167751-16170794:-	gln-3	Y105C5B.28	WBGene00001604	0.868962	0.832867	0.640238	0.210209	0.482949	0.187094	0.000682531	2.94783e-15	0.0812063	0.103602	0.13385	-0.429177	0.259723	0.340429	0.64333	1.34265	46.0301	46.3083	34.0695	27.5525	51.2097	39.6541	49.7339	83.4364	34.3376	46.7554
chrIV:17272194-17273615:-	gln-5	F26D10.10	WBGene00001606	0.190996	0.89861	0.00288508	0.287471	0.0760417	0.83444	0.665322	0.512353	0.137311	0.0203525	-0.46548	0.114592	-0.167591	0.0794429	-0.098871	-0.165623	232.567	211.335	139.664	213.884	179.475	207.193	182.143	173.54	218.222	230.023
chrIV:9739183-9740882:-	gln-6	C28D4.3	WBGene00001607	0.707795	1.46248e-07	0.283686	0.0358379	0.444402	0.0670918	0.106859	0.947456	0.0463039	0.41478	-0.19652	0.186405	0.0793944	0.329584	0.269279	-0.0253572	335.266	428.298	250.867	345.648	328.216	366.693	351.12	283.852	322.473	353.544
chrX:9870750-9872567:-	R07B1.8	R07B1.8	WBGene00001608	0.14711	0.0282306	0.258272	0.0412414	0.592854	0.696204	0.0267669	0.00222478	-0.56857	-0.809007	0.467431	-0.745032	-0.239248	-0.276886	-0.825476	-1.10576	1.34295	1.01363	3.41002	1.04145	1.78136	1.73162	0.972668	0.703758	2.51075	2.57189
chrIII:9092164-9099606:+	glp-1	F02A9.6	WBGene00001609	0.00293897	0.000243046	0.0356764	8.73438e-07	0.014465	0.186269	0.225421	0.844489	0.240037	0.28995	-0.273443	0.37046	0.196413	0.214117	0.174734	0.0533817	94.3327	96.3808	69.9346	96.548	87.5024	98.9235	96.2016	88.2403	94.7589	86.8296
chrIII:8584106-8588535:-	glr-1	C06E1.4	WBGene00001612	0.942028	0.941687	0.930841	0.461389	0.8516	0.837329	0.250298	0.706804	-0.0453714	-0.048363	0.0649166	-0.34445	0.106052	-0.19067	0.52307	-0.27776	0.439085	0.431426	0.520711	0.277137	0.496611	0.380884	0.868795	0.335658	0.536559	0.505184
chrIII:7138621-7144770:-	glr-2	B0280.12	WBGene00001613	0.788707	0.976688	0.603024	0.497837	0.982086	0.982602	0.763666	0.81153	-0.142806	-0.0205612	0.267464	-0.305484	-0.0133811	-0.028683	0.172866	-0.188184	0.748556	0.839887	1.03951	0.590454	0.815159	0.783981	0.95037	0.655954	0.890482	0.942547
chrI:7117807-7121544:+	glr-3	K10D3.1	WBGene00001614	NA	NA	0.76269	0.384123	0.7468	NA	0.844881	NA	0.12824	0.155332	0.161334	-0.348474	0.155319	0.0869519	-0.109983	0.0548119	0.172499	0.181381	0.201592	0.0222943	0.170971	0.169052	0.0866676	0.152951	0.145459	0.13874
chrII:7785022-7794267:-	glr-4	C06A8.9	WBGene00001615	0.374288	0.631329	0.255483	0.93299	0.0306147	0.904493	0.548931	0.964215	0.319093	0.203503	0.386143	0.0425055	0.618721	-0.0951024	0.234787	-0.0360286	1.76118	1.57854	2.48791	1.30405	2.15132	1.68811	2.20261	1.76209	2.02469	1.45819
chrV:8716473-8720871:+	glr-5	ZC196.7	WBGene00001616	0.311184	0.877801	0.457764	0.0327246	0.920787	0.660444	0.94564	0.502683	-0.334798	0.0718946	0.28718	-0.613131	-0.042908	-0.253298	0.0396618	-0.320414	1.50573	2.07739	2.31434	1.11662	1.82874	1.48234	1.89038	1.39317	2.04086	2.1616
chrX:6836346-6840575:-	glr-6	F41B4.4	WBGene00001617	0.115367	0.870396	0.382092	0.64876	0.304273	0.120863	0.0148563	0.430829	0.415945	0.0678823	0.285934	0.150683	0.277893	-0.509857	-0.666516	-0.315857	3.11919	2.34716	3.67541	2.36745	2.67843	1.94954	1.71026	2.28136	3.2772	2.45313
chrX:2413902-2417885:-	glr-7	C43H6.9	WBGene00001618	NA	NA	0.798817	0.940874	0.737329	NA	0.510862	NA	0.138886	0.368292	0.152666	-0.0429129	0.162267	0.197027	0.319963	0.202011	0.163937	0.259355	0.223585	0.0923757	0.164446	0.241408	0.305371	0.24535	0.176953	0.123202
chrX:6506847-6509845:+	glr-8	F22A3.3	WBGene00001619	NA	NA	0.844073	0.934568	0.759193	NA	0.979626	NA	0.252361	0.132382	0.117543	-0.0436713	0.138458	-0.05603	0.0181439	-0.346714	0.270282	0.196886	0.337529	0.0984913	0.191458	0.230003	0.27273	0.0763329	0.291901	0.13849
chrX:3496013-3499152:+	glt-1	C12D12.2	WBGene00001620	0.642094	0.979957	0.556117	0.818961	0.100949	0.323005	0.0782614	0.0886572	0.0757926	0.00564395	-0.0942349	-0.0406858	0.198595	0.16507	0.219177	0.228536	56.6313	53.1868	55.0929	48.767	59.0695	66.2053	68.7841	69.2226	65.676	58.4539
chrIV:10130344-10133255:+	glt-3	K08F4.4	WBGene00001621	0.0329715	0.297765	0.777097	0.00448343	0.021065	0.468589	0.483783	0.350683	-0.602045	-0.344697	0.108656	-0.764848	-0.611539	-0.284664	-0.22445	-0.327001	3.62041	4.42093	6.31536	2.96795	3.43964	4.67007	4.88247	4.50656	6.48616	6.44282
chrX:6403387-6406876:+	glt-4	T22E5.2	WBGene00001622	0.791168	0.380735	0.804036	0.924486	0.418727	0.987403	0.830432	0.750552	-0.0973155	-0.273486	0.0999741	-0.038654	0.2276	-0.0148071	0.0875887	0.155	4.38373	3.75852	5.859	4.29618	5.39176	5.35845	5.80881	6.11176	6.05061	5.15494
chrII:9706437-9708826:-	glt-5	Y53C12A.2	WBGene00001623	0.974941	0.570392	0.0404444	0.937284	0.890792	0.745117	0.745619	0.765302	-0.0170051	-0.235936	0.654656	-0.0398923	0.063158	0.213678	0.154342	-0.186322	2.49334	2.03584	4.34096	2.28443	2.54698	3.01354	2.86656	2.13482	2.79945	2.7532
chrIV:7503611-7506422:+	glt-6	R05G6.6	WBGene00001624	0.0254984	0.439505	0.833637	0.00983968	0.268891	0.339854	0.761169	0.625817	-0.701404	-0.304109	0.10769	-0.791177	-0.36994	-0.430363	-0.146359	-0.26516	1.55983	2.19232	3.15808	1.33859	2.00203	1.99913	2.55488	2.30442	3.22554	3.1323
chrIV:532135-535688:+	glt-7	W03G1.1	WBGene00001625	0.153271	0.0393654	0.850681	0.0824091	0.189752	0.14079	0.0999927	0.852627	-0.591389	-0.807288	-0.125937	-0.684826	-0.523272	-0.728249	-0.701462	-0.160745	0.703979	0.522384	0.851115	0.587404	0.730954	0.341349	0.350419	0.814093	1.11607	1.47388
chrII:10899982-10902144:-	gly-1	F44F4.6	WBGene00001626	0.363491	0.756367	0.837122	0.829775	0.731018	0.617664	0.445825	NA	-0.401572	-0.174275	0.134932	-0.118657	-0.176165	-0.354822	-0.377174	-0.357945	0.23991	0.391249	0.849712	0.406142	0.378156	0.397124	0.373497	0.391453	0.794803	0.5873
chrI:6507895-6511617:+	gly-2	C55B7.2	WBGene00001627	0.778566	0.186424	0.951639	0.263868	0.891142	0.430923	0.201354	0.790758	-0.0937404	-0.348097	0.029001	-0.292523	-0.0477211	-0.29772	-0.358337	-0.133355	5.5067	4.46816	6.29797	4.41677	5.44935	4.89369	4.65695	5.55959	6.87197	6.44103
chrIII:7914242-7917702:-	gly-3	ZK688.8	WBGene00001628	0.289379	0.00368218	0.391938	0.0229029	0.00803252	0.203217	0.0392938	0.0759759	0.125712	0.286818	-0.140444	0.230461	0.252629	0.217128	0.277948	0.262044	48.5869	53.7558	40.1026	48.8424	50.811	51.7345	54.055	53.431	49.4548	48.4238
chrV:19881341-19895319:-	gly-4	Y116F11B.12	WBGene00001629	0.213864	0.981338	0.218944	0.879046	0.000767928	0.996078	0.23739	3.29914e-16	0.176646	-0.00538106	0.179785	0.0300358	0.382058	-0.00275882	-0.176394	0.874436	23.2991	20.2013	26.4867	19.6061	25.7775	23.2641	20.5501	43.3692	25.9886	22.3728
chrIII:13187291-13204793:+	gly-5	Y39E4B.12	WBGene00001630	0.00189894	0.157757	0.477504	8.32958e-05	4.88813e-05	0.752526	0.949925	0.547778	0.303558	0.163652	0.120433	0.37043	0.369219	0.0874803	0.0156786	0.127285	39.1683	35.0339	38.686	38.3531	39.2308	37.7823	35.9085	38.8749	39.6024	34.4305
chrIII:4324261-4331200:-	gly-6	H38K22.5	WBGene00001631	0.0778142	0.0167157	0.732876	3.55401e-06	0.169376	0.491561	0.940734	0.740312	-0.265577	-0.346495	0.0863838	-0.609268	-0.202369	-0.185543	-0.0236336	0.105972	10.7837	10.0429	12.156	7.86941	10.7888	9.97417	11.2222	12.3202	12.7355	14.2145
chrV:1815851-1821322:-	gly-7	Y46H3A.6	WBGene00001632	0.406432	0.856063	0.0143349	0.0886386	0.876204	0.286921	0.808759	0.876989	0.0957825	-0.0281727	-0.321587	0.169028	0.0225634	0.19152	-0.0505554	0.0454369	69.3298	62.6801	51.3443	68.205	62.969	73.992	62.3023	66.7016	72.0399	70.593
chrIII:11624891-11628138:+	gly-8	Y66A7A.6	WBGene00001633	0.611859	0.00091952	0.983742	0.425152	0.269165	0.837329	0.903489	4.98021e-05	-0.0981966	-0.465971	0.00776747	-0.139559	0.171212	0.0859849	-0.0388961	0.665211	23.9651	18.1398	27.0715	21.7678	27.7952	28.6821	26.1509	43.6953	29.9956	28.0189
chrIV:13778842-13782362:+	gly-10	Y45F10D.3	WBGene00001635	0.724824	0.857135	0.0672651	0.0512623	0.13768	0.349907	0.603736	0.968416	0.0519104	0.0307349	-0.235742	0.207473	0.159345	0.164393	0.0866701	-0.0133298	47.9465	46.6052	41.2796	49.9645	49.4575	54.8338	51.9119	48.3467	54.4399	50.3399
chrIII:12171251-12177144:-	gly-11	Y75B8A.9	WBGene00001636	0.495532	0.937829	0.144058	0.179508	0.000114722	0.811003	0.0787065	0.718232	0.1729	-0.0280441	0.351692	0.29312	0.670178	-0.121421	-0.420702	0.149626	6.51098	5.52475	8.53517	6.64965	8.98402	5.9599	4.74742	7.33819	7.31083	6.2296
chrX:7485819-7490651:+	gly-12	F48E3.1	WBGene00001637	0.613002	0.566841	0.56464	0.660775	0.903281	0.813023	0.681326	0.458418	0.192597	0.222127	0.228912	-0.170339	0.0529964	-0.160777	-0.176296	-0.335157	2.30332	2.33027	2.81243	1.5854	1.96342	2.04438	2.01437	1.76278	2.60201	2.14058
chrX:9293607-9296563:-	gly-13	B0416.6	WBGene00001638	5.81689e-13	5.38969e-06	0.743766	0.0580236	5.05742e-12	0.696791	0.0367407	0.723221	0.836282	-0.595467	0.0879589	0.266476	-0.829474	-0.13514	-0.383225	0.117464	39.0698	13.8269	18.7481	24.2935	11.3331	15.9286	13.2765	19.1726	19.6184	23.4252
chrIII:3490323-3493221:-	gly-14	M01F1.1	WBGene00001639	0.0512721	0.779685	0.0322063	0.160906	0.00825879	0.871377	0.550647	0.998628	0.678497	-0.148886	0.764195	0.516467	-0.87053	0.142236	-0.283058	0.00357612	2.96816	1.36924	3.89566	2.4051	0.626247	2.2277	1.45689	1.95055	2.15743	1.74942
chrI:12462166-12465821:+	gly-15	C54C8.11	WBGene00001640	NA	NA	0.640238	NA	0.905948	NA	0.875143	NA	0.13235	0.0444263	0.243931	-0.164561	-0.0586589	0.177161	0.0987453	0.147023	0.258644	0.202418	0.337286	0.0826234	0.140365	0.287319	0.240892	0.271974	0.201788	0.193584
chrI:12379326-12381023:-	gly-16	T15D6.2	WBGene00001641	NA	NA	NA	NA	NA	NA	NA	NA	0	0	NA	0	0.0531141	NA	NA	NA	0	0	0	0	0.0157395	0	0	0	0	0
chrI:12376895-12378665:-	gly-17	T15D6.3	WBGene00001642	NA	NA	NA	NA	NA	NA	NA	NA	0	0	0	0	0.0531141	0	0.0620273	0	0	0	0	0	0.0169039	0	0.0261213	0	0	0
chrI:7110239-7112286:+	gly-18	F22D6.11	WBGene00001643	0.940318	0.770098	0.682517	0.731017	0.979523	0.950588	0.898507	NA	0.0471705	0.164781	0.221347	-0.17448	-0.0164425	-0.0719797	0.0827277	-0.0365164	0.421016	0.514494	0.586211	0.242706	0.357533	0.314439	0.447037	0.341844	0.414734	0.419085
chrI:7112901-7115000:+	gly-19	F22D6.12	WBGene00001644	0.487924	0.202888	0.5958	0.458922	0.900082	0.835994	0.822618	0.939261	0.230909	-0.39526	0.228124	-0.243943	-0.0510397	0.152138	0.113362	-0.0578781	4.92339	2.93022	4.18343	3.13678	3.7599	3.926	3.79612	3.28282	3.84398	4.46231
chrV:11282554-11286024:+	gly-20	C03E10.4	WBGene00001645	0.445532	0.165314	0.278847	0.940305	0.275382	0.832432	0.999958	0.688526	0.0895279	0.148114	-0.182457	0.0120193	-0.113475	0.0712758	8.07108e-05	-0.105272	75.47	77.6672	55.4787	66.7247	62.5632	66.5373	63.2425	58.6356	70.5385	77.1901
chrV:10319510-10320133:-	gna-1	B0024.12	WBGene00001646	0.579946	0.444594	0.999573	0.837457	0.182549	0.898399	0.535035	0.684131	0.182045	0.244263	-0.000206398	-0.0778411	-0.354016	-0.0963876	-0.237288	-0.214708	12.84	13.3137	10.4254	9.75087	8.05615	9.65836	8.60084	8.77295	11.6579	12.1239
chrI:7699539-7700958:+	gna-2	T23G11.2	WBGene00001647	0.116119	0.29844	0.0103741	0.0659254	0.491029	0.942189	0.798217	0.00165787	0.171158	0.12604	-0.360459	0.191958	-0.0837618	-0.0305496	-0.0572967	-0.433276	111.1	106.304	74.5329	105.301	88.7504	94.4094	92.6372	70.756	107.659	107.268
chrI:7522112-7526699:+	goa-1	C26C6.2	WBGene00001648	0.000641566	0.0151949	0.956784	3.33901e-09	2.63884e-14	0.0628472	0.0967316	0.502352	0.445829	0.33928	0.0116803	0.721783	0.891565	0.232201	0.193471	0.114386	47.2118	43.1815	49.9211	53.7095	62.0776	58.3187	56.7625	53.6863	55.2286	37.3306
chrX:15493468-15497400:+	gob-1	H13N06.3	WBGene00001649	0.0179748	0.00716986	0.049521	0.00871441	0.0633482	0.305168	0.411435	0.840667	-0.274939	-0.310172	-0.269269	-0.298427	-0.213348	-0.188648	-0.134373	0.0567159	37.2428	35.8468	33.6341	34.2489	37.2072	35.615	37.0416	42.443	45.4763	49.3164
chrIV:9935046-9953408:-	gon-1	F25H8.3	WBGene00001650	0.351774	0.644239	0.0990898	0.119999	0.00106431	0.268511	0.501997	0.232878	-0.143536	-0.0845965	0.26472	-0.214258	0.380879	-0.227351	-0.130982	-0.231484	9.28274	9.55717	13.6285	8.2532	12.901	9.56681	10.2503	9.53344	12.5596	11.2
chrI:8549507-8570951:-	gon-2	T01H8.5	WBGene00001651	4.54087e-06	8.47875e-09	0.00399963	0.00934211	1.865e-20	0.19809	8.41677e-07	0.0266768	0.45517	0.561007	0.333005	0.279312	0.844405	0.197583	0.521678	0.278042	16.394	17.4515	19.3028	13.5232	20.6419	17.5396	22.067	18.5645	16.9995	12.9352
chrIV:10197798-10202987:+	gon-4	K04D7.5	WBGene00001653	0.132828	0.365186	0.00630443	0.0339629	0.869987	0.0170243	0.17472	0.840667	0.15951	0.109316	-0.335567	0.20857	-0.024376	0.316386	0.187528	0.0539378	52.7178	50.2844	34.0583	50.9623	44.2924	54.1327	49.4089	44.9307	48.2376	51.3221
chrIII:5254431-5258883:+	gop-1	C34E10.3	WBGene00001660	0.428246	0.86686	0.542409	0.374652	0.876204	0.37499	0.820451	0.887451	0.132308	-0.0379511	-0.109055	0.142874	-0.0324132	0.172842	0.048831	0.04309	25.6385	22.4406	20.1749	24.1119	21.7855	24.6745	22.5841	22.5001	24.3354	25.4001
chrIII:5258984-5260471:+	gop-2	C34E10.2	WBGene00001661	0.810834	0.300864	0.0136171	0.942996	6.47666e-06	0.329787	0.763846	0.33166	-0.0399904	0.136635	-0.332812	0.0132993	-0.442336	-0.186124	-0.0621123	-0.180228	60.546	67.716	43.4585	58.726	43.5433	48.2893	52.7444	48.4782	61.5044	67.8444
chrIII:5260654-5263910:+	gop-3	C34E10.1	WBGene00001662	0.363491	0.496162	0.261923	0.119196	0.00233379	0.491301	0.768169	0.69651	-0.104326	-0.0856648	-0.167097	-0.15966	-0.269281	-0.141983	-0.0582584	-0.0919453	79.2666	79.2987	65.8155	71.2323	67.4878	67.0167	71.1155	69.42	82.6758	92.9232
chrV:11174549-11177541:-	gpa-1	T19C4.6	WBGene00001663	0.424127	0.0176436	0.8319	0.24104	0.576448	0.63915	0.975125	0.42618	0.342458	0.826351	0.136985	-0.47189	-0.245787	-0.339089	0.0239913	-0.463197	2.47696	3.78913	2.14202	0.993558	1.33856	1.22826	1.89895	1.0478	2.06423	1.93672
chrV:8370994-8374007:+	gpa-2	F38E1.5	WBGene00001664	0.47875	0.903557	0.880743	0.579154	0.751045	0.831162	0.553006	0.862435	-0.341421	-0.0768284	0.103621	-0.273097	-0.168034	-0.200468	0.315103	-0.152818	0.61339	0.855244	0.920674	0.629769	0.738524	0.616667	1.20324	0.652257	0.901281	1.03609
chrV:9356726-9359726:-	gpa-3	E02C12.5	WBGene00001665	0.50054	0.671299	0.843155	0.551349	0.89472	0.7272	0.69671	0.893082	-0.322648	-0.228644	0.130874	-0.283901	-0.0766867	0.284331	0.224573	-0.122482	0.891019	0.983688	1.07163	0.871371	1.12656	1.27365	1.19452	0.783478	1.01807	1.40323
chrIV:401695-405346:+	gpa-4	T07A9.7	WBGene00001666	0.834795	0.233102	0.462966	0.807315	0.602826	0.868685	0.000872053	0.0369687	0.121793	0.519968	-0.374654	-0.135152	-0.249934	0.162481	1.22877	0.879769	0.780449	1.18377	0.287764	0.535055	0.482693	0.608265	1.8622	1.32213	0.549527	0.739267
chrX:2118888-2121055:-	gpa-5	F53B1.7	WBGene00001667	NA	NA	0.913346	0.714551	0.880522	NA	0.945823	NA	-0.14922	-0.0150254	0.06712	-0.173585	-0.0807905	-0.0727411	-0.0437065	-0.184255	0.267086	0.367829	0.388561	0.234648	0.305477	0.27676	0.296277	0.190798	0.370824	0.419808
chrX:13191177-13193886:+	gpa-6	F48C11.1	WBGene00001668	NA	NA	0.658502	NA	0.757178	NA	NA	NA	0.0278278	0.0757945	0.193665	-0.0436187	0.128174	0.0429216	0.0643123	-0.0268495	0.197617	0.234909	0.315409	0.130825	0.262578	0.182206	0.198742	0.128241	0.161522	0.191306
chrIV:10403998-10408245:+	gpa-7	R10H10.5	WBGene00001669	0.483622	0.114221	0.596566	0.49037	0.543082	0.983535	0.0587596	0.971251	0.243664	0.473519	0.218723	-0.241919	-0.207354	-0.0222848	0.584735	0.028661	5.57929	6.62102	5.29324	3.49716	3.69974	4.32869	7.1568	4.53167	4.92646	4.98615
chrV:12638834-12640452:-	gpa-8	F56H9.3	WBGene00001670	NA	NA	0.217797	0.870086	0.87297	NA	0.671345	NA	0.0269256	0.0844084	0.511046	-0.0809918	0.0804342	0.53755	0.218299	0.0646763	0.25434	0.29677	0.581665	0.165432	0.27953	0.609606	0.314506	0.199881	0.166028	0.255767
chrV:12646809-12649296:-	gpa-9	F56H9.4	WBGene00001671	2.94609e-05	0.0404768	5.12512e-07	0.0668654	0.00470551	1.80529e-05	1.2474e-08	0.715873	1.34117	0.755752	1.56888	0.67453	0.931077	1.40444	1.74754	0.247793	2.21211	1.27799	2.37083	1.11729	1.45281	2.06394	2.76852	0.666205	0.521668	0.615948
chrV:6852542-6854786:-	gpa-10	C55H1.2	WBGene00001672	0.940318	0.936859	0.878245	0.784193	0.976488	NA	0.74322	NA	0.0473019	0.0522818	0.0936548	-0.144613	-0.0189806	0.0881133	0.17435	-0.0187449	0.450454	0.449177	0.336489	0.282436	0.380569	0.326713	0.408137	0.252294	0.294177	0.449503
chrII:4247200-4255284:+	gpa-11	C16A11.1	WBGene00001673	NA	NA	0.771188	0.546966	0.896964	NA	0.330052	NA	0.504593	-0.0230627	0.169351	-0.263827	-0.0712108	0.200877	0.434088	0.223445	0.622659	0.225288	0.264059	0.092173	0.196646	0.283668	0.450878	0.298711	0.179014	0.264926
chrX:9246948-9249164:+	gpa-12	F18G5.3	WBGene00001674	0.635861	0.942368	0.859542	0.494544	0.632424	0.917199	0.548962	0.732566	-0.157289	-0.0307708	0.0789245	-0.209425	-0.148629	-0.0747905	0.209153	-0.173123	5.49344	5.98963	6.85573	4.92717	5.29061	6.07097	7.5926	5.61803	7.17838	6.76718
chrV:12752745-12754876:-	gpa-13	F18E2.5	WBGene00001675	0.325405	0.974356	0.568516	0.24244	0.312363	NA	0.724189	NA	-0.435909	-0.0230932	0.295459	-0.49262	-0.42751	-0.0279711	0.199675	0.0198764	0.358167	0.727995	0.608046	0.294205	0.357272	0.330051	0.518885	0.365499	0.389882	0.826811
chrI:5942421-5945539:+	gpa-14	B0207.3	WBGene00001676	0.0602213	0.87732	0.322986	0.5578	0.728887	0.974491	0.874779	NA	0.748647	0.0992905	0.471681	-0.284166	0.182257	0.0426877	0.107647	0.0379429	1.51289	0.633997	1.04265	0.281817	0.694405	0.547926	0.60719	0.543586	0.561159	0.591985
chrI:8531715-8535244:-	gpa-15	M04C7.1	WBGene00001677	0.147347	0.0386236	0.0324897	0.918124	0.00559123	0.872834	0.306528	0.952057	0.607512	0.818917	0.872623	-0.0639139	0.996672	-0.158321	0.480605	0.0598848	1.09215	1.38006	1.76874	0.385924	1.58233	0.368794	1.08299	0.565162	0.553922	0.500721
chrI:897289-906007:+	gpa-16	Y95B8A.5	WBGene00001678	0.539113	0.637189	0.321904	0.693951	0.984778	0.817621	0.446486	0.793821	0.0891841	0.0746838	-0.184522	-0.0604782	0.00349298	-0.0830031	-0.149327	0.082941	66.8778	65.3476	47.462	56.1341	60.1856	51.0626	48.7034	57.5665	60.4938	68.3977
chrII:11742774-11748548:-	gpb-1	F13D12.7	WBGene00001679	0.0110927	0.290118	0.49599	0.0386204	2.1686e-16	0.203172	0.0619264	0.00870414	0.35865	0.182593	0.191441	0.301424	0.974584	0.35389	0.417245	0.568376	18.0718	15.7114	16.2665	16.2124	26.8549	18.3626	19.27	21.5654	15.6984	15.1989
chrI:7318297-7321083:-	gpb-2	F52A8.2	WBGene00001680	0.0309141	0.0857575	0.995897	0.0210887	0.0408143	0.432348	0.847166	0.840667	-0.507707	-0.429349	0.00316246	-0.534051	-0.457631	-0.282692	-0.0750097	-0.101268	6.13108	6.42744	8.23458	5.62985	6.09985	6.60159	7.74789	7.59765	9.15666	9.87095
chrX:12881158-12884919:-	gpc-1	K02A4.2	WBGene00001681	0.922008	0.892774	0.64366	0.411731	0.630699	0.934754	0.639611	0.835834	0.0613404	0.0875673	0.263241	-0.378726	-0.239659	-0.0943048	0.261574	-0.179051	1.13446	1.16265	1.33782	0.545141	0.709133	0.812508	1.33866	0.710121	1.04439	1.13961
chrI:6757461-6758180:+	gpc-2	F08B6.2	WBGene00001682	0.129776	0.483937	0.369612	0.28343	0.00819985	0.837585	0.129552	0.446162	-0.21271	-0.117825	-0.165425	-0.158682	-0.31966	-0.0716526	-0.249228	-0.171953	62.5151	66.0651	57.5201	60.7443	55.3924	61.4819	54.1593	57.2888	72.2821	79.2658
chrII:10394054-10395288:+	gpd-1	T09F3.3	WBGene00001683	0.303317	0.00032452	0.00181023	0.0494546	0.0926863	0.0678851	0.106333	0.640657	0.112895	0.316795	-0.396836	0.187735	-0.159708	0.277736	0.227932	-0.108775	305.556	347.813	203.97	300.981	241.232	329.983	318.504	250.509	301.964	307.43
chrX:3113424-3114761:-	gpd-2	K10B3.8	WBGene00001684	0.127451	0.0277148	0.00211526	0.0285673	0.640528	0.36514	0.441553	0.907459	-0.170434	-0.231935	-0.284426	-0.226487	-0.0626026	-0.126832	0.0925663	-0.0259089	410.535	387.642	366.075	368.991	423.685	409.074	477.272	439.106	498.771	504.388
chrX:3112073-3113372:-	gpd-3	K10B3.7	WBGene00001685	0.133745	0.0333886	0.0219447	0.0180233	0.843042	0.690867	0.179166	0.897279	-0.17656	-0.237134	-0.210941	-0.253652	-0.0318888	-0.0704061	0.135813	0.0270027	478.611	452.217	443.279	423.86	507.111	489.327	565.558	523.94	573.413	590.721
chrII:10171211-10172437:+	gpd-4	F33H1.2	WBGene00001686	0.000435095	3.68523e-05	0.163402	0.0251375	0.970091	0.0501524	0.0484228	0.770094	0.316289	0.366501	-0.200289	0.215024	-0.00622949	0.285704	0.263093	-0.0749727	291.365	297.661	192.445	253.518	222.058	272.024	267.706	210.391	247.566	254.01
chrX:15681658-15687404:+	gpn-1	F59D12.4	WBGene00001687	0.696839	0.989811	0.0407739	0.845695	0.635037	0.907765	0.85829	0.824697	0.20329	-0.00853307	0.790697	-0.110207	0.229708	-0.118604	0.113952	-0.179775	0.981484	0.763124	2.09703	0.638704	0.960008	0.837728	1.08149	0.783672	1.06617	0.852125
chrIII:8628855-8630697:+	gpr-1	F22B7.13	WBGene00001688	0.223627	0.941217	0.103219	0.956868	0.000369721	0.988973	0.420862	0.726072	-0.174327	-0.0163173	-0.283232	-0.0116363	-0.406755	-0.00764479	-0.16218	-0.106671	26.7966	29.5981	21.4405	28.1102	21.7127	26.172	23.4236	24.3725	29.3757	33.054
chrIII:9391186-9393080:-	gpr-2	C38C10.4	WBGene00001689	0.308596	0.367906	0.149813	0.883919	0.0303301	0.915359	0.939181	0.946054	-0.157216	0.145164	-0.246181	-0.0298597	-0.274495	0.0446433	-0.0223436	-0.0259788	26.7748	32.7749	23.3361	27.397	23.5516	28.7739	27.4375	27.3547	31.0931	32.6401
chrX:11109384-11115775:+	grd-1	R08B4.1	WBGene00001690	0.911813	0.460896	0.0293386	0.711983	0.00182213	0.463242	0.503632	0.152683	0.0666481	0.345634	0.775516	-0.186818	1.03798	0.405369	0.30536	0.602876	0.492557	0.653385	1.28547	0.346559	1.21149	0.925459	0.837042	1.09932	0.692255	0.497018
chrV:20609832-20613753:+	grd-2	F46B3.5	WBGene00001691	NA	NA	5.65723e-06	NA	0.192071	0.44268	0.0653148	0.942535	0.0319049	-0.156243	1.63763	0.00204997	0.402431	0.472682	0.765934	-0.0707603	0.0635444	0.0109617	1.23182	0.0513383	0.177472	0.295764	0.453981	0.0976347	0.125128	0.0585065
chrIV:3439652-3440453:+	grd-3	W05E7.1	WBGene00001692	0.922564	0.70869	0.0858839	0.0977654	0.107787	0.90076	0.0607011	0.581851	-0.0185137	-0.0638163	-0.209501	-0.203595	-0.191067	-0.0375875	0.222922	0.104696	242.478	231.536	197.22	198.873	205.155	222.8	267.923	246.426	255.188	267.618
chrX:8501286-8502229:+	grd-4	T01B10.1	WBGene00001693	0.49133	0.075658	0.00856412	0.0167682	0.00131259	0.522827	0.483104	0.988632	-0.293329	-0.645497	-0.973352	-0.807081	-1.00418	-0.390541	-0.331807	-0.0172823	5.00285	3.54352	1.71492	2.85809	2.42743	3.25144	3.46652	4.69828	5.35414	7.09474
chrV:8619010-8619847:+	grd-5	F41E6.2	WBGene00001694	0.66966	0.830826	0.944505	0.0127647	0.53102	0.868807	0.35146	0.731985	-0.0717675	-0.0416301	-0.0176812	-0.300951	-0.0935167	0.0524324	0.144093	0.0838536	147.4	148.661	142.788	117.151	138.766	150.002	160.151	153.4	161.185	168.994
chrV:9221867-9224326:+	grd-6	T18H9.1	WBGene00001695	NA	NA	0.00641375	NA	NA	0.691744	0.671818	NA	-0.00434965	0.186962	0.998596	-0.0489326	0.527568	0.286091	0.222338	0.0428594	0.0348362	0.109504	1.03208	0.0176193	0.251439	0.29549	0.250178	0.140686	0.123209	0.0391037
chrX:7267944-7272022:-	grd-7	F46H5.6	WBGene00001696	NA	NA	NA	NA	NA	NA	NA	NA	-0.00739152	-0.183165	0.170811	-0.0895824	0.0540774	0.0432889	0.118731	-0.0124708	0.068608	0.0141957	0.0748591	0.0401837	0.0822956	0.0289584	0.0562388	0.0119078	0.0164233	0.0777837
chrV:7842524-7844280:+	grd-8	C37C3.4	WBGene00001697	NA	NA	NA	NA	NA	NA	NA	NA	-0.00183659	0.188572	0.0824377	0.0471697	0.111518	-0.0976602	-0.0816197	-0.0135991	0.0275439	0.147039	0.143338	0.0528363	0.0897609	0.0193916	0.0285334	0.0754626	0.0945811	0.0304422
chrV:5895371-5898585:+	grd-9	C04E6.6	WBGene00001698	NA	NA	0.921992	NA	NA	NA	NA	NA	0.121783	-0.0398799	0.0519545	0.0430932	0.0817384	0.024624	0.358654	0.012394	0.0963379	0.0345223	0.07198	0.06156	0.0756678	0.0608891	0.214071	0.0568198	0.0568067	0.0543823
chrIV:3441088-3441785:+	grd-10	F09D12.1	WBGene00001699	0.681733	0.833345	0.205279	0.534036	0.0294571	0.385438	0.903859	0.00337681	0.0941213	-0.0562758	0.260071	-0.131424	0.343721	-0.23601	-0.0394795	-0.537079	45.8353	40.5167	64.58	36.343	52.5129	44.8563	51.8861	36.0009	59.5516	46.6135
chrV:20356771-20365687:+	grd-11	K02E2.2	WBGene00001700	0.55966	0.0862478	0.212738	0.474036	0.895346	NA	0.332068	NA	0.273554	0.664521	0.523238	0.316762	0.0740317	0.322998	0.425879	0.0856501	0.152197	0.297933	0.243698	0.155546	0.0938688	0.164983	0.203625	0.0900703	0.0712281	0.0806522
chrV:14978490-14979966:+	grd-12	F02D8.2	WBGene00001701	NA	NA	NA	NA	NA	NA	NA	NA	-0.0438276	0.0429779	0.259218	0.00149828	0.108054	0.0358726	0.244789	0.115643	0	0.0745855	0.231738	0.0364707	0.121983	0.0352482	0.220857	0.0986818	0	0.039809
chrIV:3438309-3439499:+	grd-13	W05E7.3	WBGene00001702	0.306772	0.379892	0.825945	0.0475582	0.636235	0.41833	0.851714	0.681504	-0.276904	-0.25211	-0.0851283	-0.471638	-0.138715	-0.291474	-0.0739068	-0.176723	15.3139	15.4016	18.2097	12.3343	16.2785	15.5544	18.3802	16.9763	21.6789	20.645
chrX:8499611-8500984:+	grd-14	T01B10.2	WBGene00001703	0.116225	0.77042	0.000142789	0.00734236	0.951428	0.857638	0.926935	0.931555	-0.414392	-0.108262	1.14643	-0.64532	0.0237699	0.142589	-0.0550014	0.0675423	7.0294	8.82934	23.762	5.46612	9.44844	10.0335	8.4059	9.37978	9.84229	10.5945
chrI:13564556-13566301:+	grd-15	Y87G2A.15	WBGene00001704	NA	NA	0.997621	NA	NA	NA	NA	NA	-0.0481645	0.201991	0.00208557	-0.183404	-0.184204	0.00896907	0.365071	0.000122455	0.195885	0.510233	0.260726	0.0495124	0.0649915	0.267837	0.78999	0.258094	0.28766	0.273817
chrIV:2476699-2480217:+	grd-16	Y69A2AL.1	WBGene00001705	NA	NA	0.589517	0.910797	0.963415	0.950416	0.817156	NA	0.450248	0.226585	0.29009	0.063728	-0.0279776	0.076443	0.144864	-0.0538448	0.610953	0.403243	0.700881	0.258846	0.218116	0.47168	0.542672	0.360279	0.450246	0.257683
chrI:1259491-1268157:-	grh-1	Y48G8AR.1	WBGene00001707	0.833743	0.963624	0.322258	0.719223	0.645691	0.684154	0.986276	0.896743	0.0884443	0.022783	0.357258	-0.13677	0.160413	-0.239999	-0.009198	-0.0910247	3.563	3.33377	4.60756	2.77797	3.60485	2.80135	3.40081	3.16626	3.81676	3.61386
chrX:9991268-9999120:-	grk-1	F19C6.1	WBGene00001708	1.26345e-05	0.595168	0.891482	0.0376013	7.4383e-05	0.936307	0.0538461	0.656887	0.617652	-0.117257	-0.0427629	0.329621	0.549455	-0.0411533	-0.361111	-0.140749	17.1927	9.97361	12.074	13.0417	15.6439	12.0571	9.55676	11.2331	13.8915	11.9721
chrIII:676117-680042:+	grk-2	W02B3.2	WBGene00001709	0.208463	0.70052	0.404082	0.232862	0.911861	0.677678	0.0481189	0.743931	-0.299022	0.11614	-0.24032	-0.283097	0.0355013	-0.182741	-0.47733	-0.144911	4.74721	6.41137	5.19948	4.49664	5.84163	5.42824	4.32805	5.58148	6.95395	6.48477
chrV:5530707-5533840:-	grl-1	C24G6.7	WBGene00001710	NA	NA	0.875732	0.800013	0.967599	NA	0.682414	NA	-0.32286	0.0172444	-0.0953881	0.12993	-0.0249223	-0.385387	-0.207585	-0.152259	0.128172	0.351863	0.344574	0.418848	0.309546	0.140243	0.257725	0.301112	0.479811	0.373525
chrV:12944845-12946837:+	grl-2	T16G1.8	WBGene00001711	NA	NA	NA	NA	NA	NA	NA	NA	0.151735	0.118584	0.203916	0	0.0536449	0.141609	0.180534	0.0358601	0.0838023	0.0649469	0.0964731	0	0.0277907	0.0646246	0.0848893	0.0181598	0	0
chrV:11411493-11412751:+	grl-3	K03B8.7	WBGene00001712	NA	NA	0.840764	0.643465	0.547147	NA	NA	NA	-0.0772903	0.102863	-0.10004	-0.183214	-0.227018	-0.22961	-0.116238	-0.253362	0.273086	0.468762	0.223825	0.154473	0.136009	0.114791	0.206295	0.0934536	0.355022	0.388283
chrIV:7309824-7310749:-	grl-4	F42C5.7	WBGene00001713	0.880119	0.503433	0.0652043	0.88437	0.0987113	0.612361	0.652806	0.947501	0.0652789	-0.238312	0.509086	0.0607832	0.441669	0.239629	0.168518	-0.042861	10.9121	8.4239	16.3262	10.1698	14.0524	13.2153	12.4654	10.5425	12.1699	11.2773
chrV:4412733-4414612:-	grl-5	Y47D7A.5	WBGene00001714	NA	NA	2.1229e-12	0.8627	0.000172196	0.0011515	0.000187668	0.61278	0.121959	0.0604616	2.33688	0.0905149	1.20226	1.25954	1.35647	0.342067	0.255852	0.195009	8.12126	0.214123	1.65542	2.88454	3.19163	0.939815	0.513415	0.162837
chrX:6449999-6450902:-	grl-6	K10C2.5	WBGene00001715	NA	NA	NA	NA	NA	NA	NA	NA	0	0	0.173845	0.092288	0.253725	0	0.0400197	0.141462	0	0	0.191748	0.0819949	0.229067	0	0.0424877	0.154231	0	0
chrV:11344799-11346994:-	grl-7	T02E9.2	WBGene00001716	0.167214	0.734911	1.32596e-10	0.912263	0.0010577	0.000300597	0.000563801	0.989617	-0.570733	-0.190034	2.17321	-0.0674218	1.15214	1.37382	1.27235	0.0165027	0.0774263	0.300837	7.5544	0.3722	1.83003	3.44436	3.09884	0.592506	0.607881	0.489019
chrV:6731931-6733059:-	grl-8	ZC487.5	WBGene00001717	0.22493	0.493372	0.987074	0.537094	0.874002	NA	0.950625	NA	-0.50385	-0.328754	0.0135975	-0.286246	-0.0906565	0.100133	0.04342	-0.100013	0.435651	0.666582	0.833087	0.693218	1.00767	0.970743	0.883566	0.659266	0.903736	1.35231
chrV:6730264-6731677:-	grl-9	ZC487.4	WBGene00001718	NA	NA	NA	NA	NA	NA	NA	NA	0	0.0444508	-0.0491541	0.0860815	0.0633134	-0.054917	-0.0420626	-0.046528	0	0.0320935	0.0262238	0.0594607	0.0425188	0.0218229	0.0321109	0.0290014	0.0726093	0
chrV:7774497-7775740:+	grl-10	C26F1.5	WBGene00001719	0.936478	0.618687	0.848989	0.717647	0.606381	0.998981	0.170664	0.43996	-0.0441518	0.225978	0.113272	-0.163151	0.209943	0.00163497	0.538038	0.408461	3.15187	3.96707	3.04842	2.64367	3.77365	2.74587	4.51228	4.00617	3.05055	3.57358
chrIII:9117272-9118287:-	grl-11	ZK512.9	WBGene00001720	NA	NA	NA	NA	NA	NA	NA	NA	-0.137004	0.0475865	-0.00619925	-0.0464175	-0.0784999	0.023897	0.036135	-0.0386613	0	0.260448	0.052186	0.111738	0.0793575	0.103793	0.127803	0	0.0706055	0.206795
chrV:8635798-8636966:-	grl-12	F28A12.2	WBGene00001721	NA	NA	NA	NA	NA	NA	NA	NA	-0.00308209	0.00109016	-0.0117095	0.046443	-0.0352995	-0.0614138	-0.00161055	-0.010254	0.0907613	0.0939711	0.0825905	0.133002	0.0603152	0.0319492	0.0940221	0.0849175	0.106302	0.10198
chrV:4362708-4364636:-	grl-13	F32D1.4	WBGene00001722	NA	NA	NA	NA	NA	NA	NA	NA	0	0	0	0	0.0906081	0	0	0.0605483	0	0	0	0	0.0737666	0	0	0.0335434	0	0
chrV:20825650-20827709:+	grl-14	T03D8.4	WBGene00001723	NA	NA	0.973382	0.698	0.974237	0.801587	0.958824	NA	0.198852	-0.0101935	0.0253382	-0.18724	-0.0197884	0.219857	0.0365835	0.00904382	0.509384	0.32804	0.413127	0.194644	0.312243	0.583836	0.42366	0.403846	0.44019	0.370262
chrIII:12232531-12235610:-	grl-15	Y75B8A.20	WBGene00001724	0.6598	0.85114	0.00135206	0.908101	0.120237	0.0729637	0.263177	0.949099	-0.219395	-0.1116	1.22445	-0.0681807	0.594335	0.832165	0.518155	-0.0633288	0.416024	0.542899	4.70803	0.573519	1.71912	3.07109	2.11083	0.885924	1.07471	0.77602
chrI:572180-575122:-	grl-16	Y65B4BR.6	WBGene00001725	0.649945	0.841779	1.27189e-06	0.455563	4.93695e-14	0.119215	0.255914	0.706798	0.199173	0.104075	1.73701	0.294202	1.99788	0.755306	0.5241	-0.279588	2.27083	2.05171	49.2878	2.32219	9.88244	14.9862	10.748	2.0934	4.74966	2.04794
chrV:13561987-13563901:-	grl-17	C56A3.1	WBGene00001726	NA	NA	NA	NA	NA	NA	NA	NA	-0.151655	0.0537185	-0.116231	-0.0026178	0.0861364	-0.0599371	0.0340404	0.0800941	0	0.102277	0	0.0677583	0.111105	0.0337848	0.0984179	0.129863	0.0823913	0.0813201
chrV:5485681-5488850:-	grl-18	T05C3.4	WBGene00001727	0.537398	0.241057	0.868004	0.834819	0.574355	3.58467e-05	0.000181024	0.603341	-0.307882	0.523355	-0.110026	-0.119592	-0.271254	1.47211	1.31937	-0.34385	0.531692	1.53084	0.83481	0.65473	0.550606	3.98919	3.51643	0.61575	1.05565	0.901961
chrIV:251970-252554:-	grl-19	R02D3.6	WBGene00001728	NA	NA	NA	NA	NA	NA	NA	NA	0.0437873	0	0.127173	0.0459354	0.0634635	0	0.0366457	0.0319874	0.0626821	0	0.219705	0.0633438	0.0831471	0	0.0621835	0.0543323	0	0
chrIV:2126096-2128852:-	grl-20	C23H5.9	WBGene00001729	NA	NA	NA	NA	NA	NA	NA	NA	-0.0424662	-0.0382773	-0.0405139	-0.0425674	-0.0283756	0.126699	0.133164	0.0589275	0.0420466	0.0452313	0	0.0380822	0.0540926	0.205734	0.210733	0.115196	0.048127	0.0960329
chrIV:10737457-10738171:+	grl-21	ZC168.5	WBGene00001730	0.475767	0.911621	1.14925e-06	0.999193	0.203007	0.868355	0.851093	0.177905	-0.336597	-0.0700397	1.73893	0.00131601	0.518357	0.165052	0.124988	-0.663125	0.460336	0.820594	11.1856	0.88709	1.86719	1.91802	1.81749	0.341133	1.67586	1.025
chrIII:5413184-5413954:-	grl-22	W03A5.3	WBGene00001731	0.978084	0.189084	0.949119	0.832175	0.983062	0.963776	0.404578	0.862907	-0.0182988	0.573775	0.0499582	-0.121024	0.013521	0.058368	0.411374	0.152184	1.45481	3.13153	1.88073	1.14833	1.4713	1.92169	3.07893	2.17057	1.91779	1.62511
chrV:12575171-12576876:-	grl-23	E02A10.2	WBGene00001732	NA	NA	NA	NA	NA	NA	NA	NA	0	0	0	0.0387287	0.0552956	0.046084	0	0.0428972	0	0	0	0.0245234	0.033222	0.0237014	0	0.0210346	0	0
chrIV:17475380-17475801:-	grl-24	F11E6.2	WBGene00001733	NA	NA	NA	NA	NA	NA	NA	NA	0.196161	-0.0437919	-0.0592512	0.0399176	0.0431935	-0.104251	0.121448	-0.149767	0.650935	0.168406	0.148011	0.303324	0.320809	0.0795868	0.491852	0	0.283592	0.275632
chrIII:8962218-8965613:+	grl-25	ZK643.8	WBGene00001734	NA	NA	NA	NA	NA	NA	NA	NA	-0.0927044	-0.0865238	-0.0473353	-0.187532	-0.0856854	-0.0445875	-0.0414869	-0.00824725	0.0214228	0.0225908	0.00905304	0	0.0220176	0.0104719	0.0106366	0.0200238	0.0250663	0.0480943
chrIV:321571-323022:-	grl-26	K02D7.6	WBGene00001735	NA	NA	0.835895	0.632106	0.463048	NA	0.806535	NA	0.0733248	0.0516239	-0.122279	0.199155	0.281132	-0.193564	-0.138186	-0.351588	0.307459	0.278021	0.55363	0.430418	0.519492	0.462037	0.534658	0.281608	0.815622	0.247427
chrV:3575116-3575871:-	grl-27	F40C5.3	WBGene00001736	NA	NA	0.41305	0.57936	0.798966	NA	0.984081	NA	0.190805	0.0894985	0.389547	-0.240957	0.126758	0.118298	-0.0137868	-0.0379411	1.11994	0.888464	1.88537	0.275715	0.920355	1.15728	0.854513	0.808188	0.98269	0.780473
chrV:3551343-3551862:-	grl-28	T24A6.15	WBGene00001737	NA	NA	NA	NA	NA	NA	NA	NA	0.0460103	0.0969473	-0.0410081	0.0906731	0.161716	-0.00436995	0.0350018	-0.0410721	0.0735815	0.155339	0	0.133288	0.242925	0.0720071	0.149365	0	0.0881385	0
chrV:3554608-3555233:-	grl-29	T24A6.18	WBGene00001738	NA	NA	NA	NA	NA	NA	NA	NA	-0.0443192	0.00194308	0.0606352	-0.0441776	-0.0463095	0	0	0	0	0.0640559	0.050376	0	0	0	0	0	0	0.0680001
chrV:3556283-3556846:+	grl-30	T24A6.3	WBGene00001739	NA	NA	NA	NA	NA	NA	NA	NA	-0.185516	-0.183845	0.0845617	-0.137451	-0.0828594	0	0	0.0289241	0	0	0.167597	0.0598086	0.133056	0	0	0.0573508	0	0.296787
chrIII:5265074-5267164:+	gro-1	ZC395.6	WBGene00001740	0.905322	0.706017	0.146632	0.987175	0.417696	0.433294	0.245019	0.879747	-0.0284602	0.0799444	-0.2835	-0.0051612	0.134212	-0.212156	-0.23785	-0.0605107	21.6258	23.0853	15.5944	20.5228	23.2432	16.4215	16.1308	18.3556	21.4133	24.0469
chrIII:8085639-8088382:+	grp-1	K06H7.4	WBGene00001743	0.0839196	0.51128	0.0464266	0.00147414	0.664969	0.567999	0.859875	0.89742	0.187445	0.0894804	-0.317588	0.307609	-0.0583335	0.150124	-0.0455787	-0.0455194	59.2868	54.6217	40.4138	60.2532	47.6688	56.6245	49.1927	49.2097	56.7127	56.5791
chrIII:5159690-5163588:-	gars-1	T10F2.1	WBGene00001744	0.0257246	0.00180827	0.312765	0.99494	0.318196	0.998463	0.943251	0.0552798	-0.182649	0.242712	-0.136731	-0.001425	-0.0903885	-0.00141728	0.0154939	0.238614	96.7955	128.752	87.4044	102.664	98.7391	96.1734	97.3531	113.984	107.4	119.846
chrI:1068594-1075013:+	gsa-1	R06A10.2	WBGene00001745	0.548399	0.955577	0.0691293	0.777925	3.39336e-07	0.874708	0.977706	0.548111	0.200409	-0.0261344	0.493224	0.103673	1.11028	0.102222	0.0145569	0.251764	4.00775	3.2963	5.97225	3.46709	7.75637	4.40945	4.09734	4.93894	4.51737	3.71772
chrI:12819206-12825552:+	gsk-3	Y18D10A.5	WBGene00001746	0.789882	0.852294	0.955219	0.994502	2.79508e-06	0.807312	0.773357	0.298317	0.0661809	0.0514011	0.0263626	0.00313557	0.672128	0.132227	0.10654	0.332797	9.95385	9.71682	10.6733	8.88552	14.7634	11.5819	11.3522	13.4925	11.6677	10.3266
chrV:10682401-10686485:+	gsp-1	F29F11.6	WBGene00001747	0.200007	0.0575855	0.987711	0.0576894	0.00121224	0.543191	0.298751	0.585504	0.159448	0.22216	0.00449695	0.216077	0.326245	0.134472	0.161488	0.12026	50.1027	51.7249	44.4133	48.6889	53.8982	48.7619	49.6679	48.2181	49.3719	48.7379
chrIII:7336523-7338697:+	gsp-2	F56C9.1	WBGene00001748	0.0708806	0.279729	0.127009	0.00211149	0.0379973	0.717106	0.627297	0.471055	0.159508	0.108189	-0.176275	0.245949	0.170716	0.0778224	-0.0713029	0.116602	200.787	191.289	162.746	199.29	193.491	194.651	175.271	200.121	205.595	195.566
chrIII:9058826-9060106:+	gst-1	R107.7	WBGene00001749	0.374012	0.356798	0.291262	0.0989642	0.000303858	0.359326	0.00102353	0.638178	0.101591	0.107775	-0.138353	-0.166083	-0.312763	0.147639	0.343766	0.0918993	294.277	291.579	212.199	227.664	210.196	259.757	298.451	249.776	261.069	298.391
chrIV:10140308-10141491:-	gst-2	K08F4.6	WBGene00001750	0.530996	0.450393	0.9113	0.328392	0.651745	0.929178	0.614999	NA	-0.311254	-0.371274	0.0799989	-0.435915	-0.227551	-0.0984036	-0.272783	-0.166386	1.36333	1.22897	1.61205	1.05867	1.46795	1.24428	0.906707	1.10153	1.6115	2.27697
chrIV:10139358-10140221:-	gst-3	K08F4.11	WBGene00001751	0.990857	0.991566	0.657663	0.59202	0.405074	0.661403	0.0320274	0.979583	-0.00715327	0.00743445	0.254495	-0.264223	-0.367145	-0.331535	-0.871316	-0.028746	1.92776	1.93849	2.37658	1.31831	1.19652	1.12223	0.345757	1.68453	1.96315	2.1193
chrIV:10142140-10143079:+	gst-4	K08F4.7	WBGene00001752	0.291778	0.000300045	0.0521213	0.228591	0.248496	0.653467	0.126104	2.62163e-08	0.195353	-0.553945	0.324773	-0.216833	0.198381	0.135408	-0.273439	0.77949	65.6723	37.627	47.4117	45.5439	62.9063	41.3673	30.734	65.8296	41.8446	62.0893
chrII:10950290-10951546:+	gst-5	R03D7.6	WBGene00001753	0.117588	0.000342826	0.509253	1.08232e-07	3.56339e-10	0.817991	0.412997	0.451559	0.241515	-0.50227	0.306526	-0.710128	0.753102	0.188667	0.357869	0.40037	39.9763	23.0756	39.6653	18.7915	55.0723	35.488	41.6276	43.3065	33.0312	36.621
chrII:4879880-4881105:+	gst-6	F11G11.3	WBGene00001754	0.501672	5.95516e-08	4.13807e-06	0.00445452	0.0339548	0.407533	0.00777744	0.000529046	0.149162	-0.895769	0.760024	-0.490224	0.353486	-0.233776	-0.498533	-0.631886	31.4518	14.3155	48.5085	18.3874	34.8581	23.4785	19.2368	17.4421	31.0673	30.7189
chrII:4882066-4883356:+	gst-7	F11G11.2	WBGene00001755	0.0151222	1.42836e-13	0.770261	0.0535885	1.66773e-14	0.562479	3.94565e-11	0.849477	0.247122	0.651865	0.0590818	0.203363	0.658949	0.128616	0.733277	-0.0533197	155.804	204.489	145.552	141.168	199.21	152.912	235.196	134.363	155.643	142.544
chrII:4883744-4884597:+	gst-8	F11G11.1	WBGene00001756	0.833677	0.689344	0.995286	0.903888	0.64398	0.989582	0.714087	0.745376	0.124827	0.222227	-0.00601372	0.0743286	0.231655	0.0185234	0.216806	0.251464	1.45959	1.63955	1.19411	1.27514	1.59669	1.24672	1.61635	1.69038	1.33586	1.32825
chrII:4891575-4893569:+	gst-9	R05F9.5	WBGene00001757	0.0658944	0.930113	0.536136	0.0388764	0.995786	0.890336	0.925841	0.685574	0.569863	-0.0474957	-0.278984	0.619947	0.00240864	0.117699	-0.0570859	0.244982	7.53938	4.40616	3.81086	7.34836	4.488	5.46512	4.6717	6.1174	5.48459	5.0725
chrV:2561689-2564707:+	gst-10	Y45G12C.2	WBGene00001758	2.30744e-18	8.77736e-09	0.0196977	2.79404e-27	0.383987	0.864312	0.981141	0.728107	-1.03095	-0.702707	-0.815823	-1.2758	-0.134312	-0.145371	-0.015859	0.228013	54.0747	67.5777	47.49	42.4576	98.307	88.9858	100.159	124.828	113.34	123.343
chrX:3632542-3633734:-	gst-11	R11G1.3	WBGene00001759	0.785303	0.554102	0.983945	0.974684	0.865509	0.788883	0.380727	NA	0.153878	0.306439	0.0166243	0.0210517	0.0988797	-0.237348	-0.423235	-0.250156	1.5162	1.85233	1.71384	1.1624	1.34016	1.15578	0.824276	1.14386	1.88184	1.31149
chrII:13616615-13617867:-	gst-12	F37B1.2	WBGene00001760	0.964146	0.853403	0.523853	0.0855515	0.0356438	0.848039	0.755946	0.300602	0.0263776	0.102878	-0.318624	0.603094	0.682306	-0.17228	-0.178392	0.519988	3.16068	3.36066	2.60323	5.04563	5.49323	3.0659	3.03498	6.09923	4.08514	3.34726
chrII:9231437-9232281:+	gst-13	T26C5.1	WBGene00001761	0.328951	0.000721435	0.734581	0.398014	6.84412e-06	0.783173	0.138411	0.000330615	0.16241	-0.468806	-0.0824589	0.142412	0.546494	0.096371	0.256686	0.53206	48.5627	30.3987	38.2127	44.7206	61.0773	43.5211	48.8323	59.5454	45.2536	47.0631
chrII:13614781-13616030:-	gst-14	F37B1.3	WBGene00001762	NA	NA	0.740829	0.606393	0.486723	0.982713	0.662119	NA	0.451374	0.155883	0.191596	0.23999	0.303526	0.0290953	0.234397	0.013861	1.12061	0.614496	0.996802	0.707983	0.811666	0.72365	1.08672	0.69262	0.744901	0.442836
chrII:13611701-13613082:-	gst-15	F37B1.4	WBGene00001763	0.506631	0.550875	0.656683	0.730844	0.747888	0.988482	0.737542	0.732623	-0.298773	-0.283546	0.231947	-0.167477	-0.154494	-0.0193	-0.185359	-0.238971	2.74134	2.74757	4.90671	2.93219	3.02646	3.87626	3.26642	3.09893	4.38274	4.01114
chrII:13622895-13624363:-	gst-16	F37B1.5	WBGene00001764	0.456182	0.506139	0.00265737	0.0261269	0.289384	0.505704	0.568781	0.813286	0.280963	0.266486	-1.01194	0.6655	0.349974	-0.369871	-0.261235	-0.169154	5.74168	5.59356	2.43129	7.3972	5.81853	4.58472	5.05289	5.48479	7.11961	4.89308
chrII:13627989-13628728:-	gst-17	F37B1.6	WBGene00001765	0.941266	0.363999	0.700767	0.820407	0.768608	0.225093	0.215944	NA	-0.0443163	-0.402715	0.216409	-0.122018	0.151145	-0.605113	-0.526164	-0.374031	0.768531	0.287974	1.55078	0.616343	1.01701	0.20326	0.27704	0.48301	1.23033	0.91047
chrII:13629729-13630817:-	gst-18	F37B1.7	WBGene00001766	0.247809	0.903469	0.713294	0.882336	0.658175	0.344559	0.0240534	NA	0.504963	0.0764859	0.219583	0.0876974	0.222541	-0.543812	-0.901944	-0.705576	1.97888	1.03608	2.64458	1.00358	1.26707	0.854913	0.316834	0.608363	2.25323	0.996656
chrII:13625474-13627071:-	gst-19	F37B1.8	WBGene00001767	0.266102	0.915855	0.990956	0.641774	0.1262	0.656771	0.953738	NA	-0.487923	-0.0679898	-0.00975826	-0.235426	-0.60396	-0.325841	-0.0415485	-0.53563	0.697909	1.37915	1.33541	1.01277	0.551938	0.7692	1.28035	0.462688	1.52651	1.67093
chrII:13608115-13609710:-	gst-20	Y48E1B.10	WBGene00001768	7.99287e-08	0.00388295	0.5452	0.0417113	3.23773e-09	0.7813	0.910819	0.99225	0.751055	-0.468635	0.302885	0.330139	0.796864	0.228236	0.074717	0.0119516	53.7366	21.7982	47.4454	37.0513	53.0555	44.0008	37.5833	35.205	38.7834	33.9707
chrV:1730759-1732000:-	gst-21	ZK697.6	WBGene00001769	0.543562	0.736846	0.497298	0.186057	0.199745	0.816807	0.88863	0.838958	-0.303922	-0.193167	-0.35578	-0.559453	-0.526452	-0.215139	0.0979478	-0.176093	1.1772	1.34731	0.894529	0.759755	0.832869	1.12426	1.70113	1.17174	1.67562	1.8778
chrV:16231014-16232262:-	gst-22	F21H7.1	WBGene00001770	0.0587645	1.89059e-06	0.0181173	2.44766e-05	1.6798e-06	0.00212574	0.00490997	0.0001919	-0.516252	-1.17963	-0.670577	-1.03681	-1.118	-0.868619	-0.772252	0.954227	9.72458	5.5582	9.31308	5.946	5.71654	7.89838	8.54681	33.9356	17.9144	15.8933
chrV:3243293-3244492:+	gst-23	T28A11.11	WBGene00001771	NA	NA	0.679933	0.845121	0.901964	NA	0.837712	NA	-0.0122252	-0.246392	0.214378	0.0985333	-0.064748	0.131737	0.118905	0.129848	0.544746	0.238593	0.737509	0.669856	0.453331	0.605438	0.594017	0.609468	0.47715	0.611878
chrII:13610373-13611272:-	gst-24	F37B1.1	WBGene00001772	0.000423725	0.272984	2.89518e-13	0.948286	0.0325702	0.312247	0.950326	0.736132	0.907698	-0.373647	1.96456	-0.0314356	0.573156	0.454829	0.038025	0.207902	15.5321	5.33712	37.1702	6.8243	11.3563	10.582	7.3095	8.50492	7.86619	8.13183
chrI:1451124-1453079:-	gst-25	F37F2.3	WBGene00001773	0.0128358	0.979957	0.0873899	0.000578813	0.140928	0.590309	0.51302	0.917419	0.933461	0.0175709	0.72788	1.22375	0.584003	-0.377934	-0.338744	-0.0978608	1.76365	0.303504	2.42047	2.33182	1.0392	0.434143	0.439968	0.76998	1.00389	0.322774
chrII:15163732-15164508:-	gst-26	Y53F4B.29	WBGene00001774	0.372045	0.00084854	0.280212	0.9351	0.485604	0.166853	0.00722409	0.0215481	-0.166565	-0.503556	0.231626	-0.0210373	-0.128225	-0.323345	-0.492716	-0.448566	38.625	29.8195	46.3207	40.1232	37.9702	30.8723	27.2036	28.1471	43.6164	47.451
chrII:15164809-15165650:-	gst-27	Y53F4B.30	WBGene00001775	0.176611	4.66825e-10	0.282009	0.497837	0.000188241	0.000130577	8.86943e-06	0.0122307	-0.186796	-0.702483	0.174909	-0.104995	-0.417928	-0.516055	-0.573944	-0.361183	71.8313	49.0434	80.2663	71.2	58.2609	49.0267	46.954	54.7134	79.0313	89.3567
chrII:15166119-15167330:-	gst-28	Y53F4B.31	WBGene00001776	0.0823748	0.00605227	0.41939	0.377277	0.0877909	0.312522	0.42965	0.669449	-0.345633	-0.513369	0.224735	-0.196053	0.312973	-0.316982	-0.221041	-0.170895	21.3085	18.5384	36.3015	22.2905	33.0791	24.0852	25.935	26.9041	34.1917	29.9757
chrII:15168462-15169784:-	gst-29	Y53F4B.32	WBGene00001777	0.354941	0.413884	0.673339	0.985514	0.97739	0.17834	0.00777191	0.0491255	0.419142	0.389991	0.244752	0.0145132	-0.0184549	0.684353	1.03918	0.857497	2.40027	2.29929	1.69702	1.3888	1.38781	3.00916	4.54524	3.68773	1.2694	1.59651
chrII:4933877-4935015:-	gst-30	ZK546.11	WBGene00001778	0.128598	0.352931	0.93629	0.677465	0.779937	0.782815	0.0427523	0.393966	0.568601	-0.404009	-0.0573838	-0.198272	0.135796	0.227265	0.771378	0.457755	5.25177	1.99834	2.71104	2.37262	3.36448	3.63793	6.17303	4.5807	3.20603	3.37487
chrII:15174195-15174889:-	gst-31	Y53F4B.35	WBGene00001779	NA	NA	0.898332	0.777925	0.56638	NA	0.986103	NA	-0.115275	0.115317	0.0814355	-0.139859	-0.25234	-0.00103602	-0.0112244	0.125134	0.522751	0.856649	0.731334	0.460388	0.352077	0.6056	0.584158	0.802471	0.66973	0.7485
chrII:15177296-15178518:-	gst-32	Y53F4B.37	WBGene00001780	0.826955	0.0760709	0.929526	0.870355	0.292489	0.947778	0.666715	0.964025	-0.127501	0.713638	0.0666246	-0.0954866	-0.443844	-0.0815848	0.245029	-0.0488866	1.8399	4.5828	1.78892	1.7755	1.18402	1.4648	2.2722	1.52206	1.82292	2.34823
chrV:3467450-3468498:-	gst-33	C02A12.1	WBGene00001781	0.797715	0.493766	0.664534	0.0702965	0.365895	0.884035	0.763859	NA	-0.146012	-0.342367	0.247868	-0.71556	-0.396756	0.146609	0.182774	0.24959	1.39125	1.02814	1.46998	0.475601	0.922443	1.26365	1.33622	1.47698	1.08265	1.84424
chrII:15179895-15183156:-	gst-34	Y1H11.1	WBGene00001782	0.942914	0.789518	0.908242	0.805691	0.973103	0.681827	0.659717	NA	-0.0436508	-0.154747	-0.0817941	-0.135261	0.0224692	-0.309637	-0.243485	-0.187977	1.03595	0.837429	1.21054	0.832186	1.09708	0.817313	0.906114	1.00256	1.53758	1.21474
chrII:15183733-15185309:-	gst-35	Y1H11.2	WBGene00001783	0.649462	0.110117	0.909093	0.41684	0.933873	0.801502	0.854845	0.844489	-0.233275	-0.660269	-0.0814085	-0.369135	-0.0501779	-0.225982	-0.120639	-0.166188	2.02475	1.15039	2.32155	1.62742	2.36039	1.96273	2.21362	2.0919	2.8469	2.8656
chrX:9861592-9862897:-	gst-36	R07B1.4	WBGene00001784	0.0779853	0.0017026	0.936307	0.204928	0.83876	0.329844	0.954194	0.869206	-0.260417	-0.427473	0.0244126	-0.197018	0.0410885	-0.222749	0.0169406	-0.0583742	46.774	40.9316	55.8339	45.8136	55.508	46.6991	55.5547	52.6099	61.1925	61.4285
chrV:1921620-1922380:+	gst-37	Y32G9A.1	WBGene00001785	NA	NA	NA	NA	NA	NA	NA	NA	-0.0446171	0.0017828	-0.0166534	-0.0875976	-0.0261431	-0.0736992	-0.0707303	-0.0412919	0.0491507	0.103559	0.124501	0	0.0672876	0.0480047	0.0487597	0.0917918	0.171055	0.112038
chrV:15915149-15916060:-	gst-38	F35E8.8	WBGene00001786	0.000631126	0.332627	5.30283e-06	0.527492	2.87443e-07	0.984111	0.929444	0.868792	1.01517	-0.393019	1.47853	0.257403	1.39945	-0.0260497	0.0604064	0.135345	6.40396	1.71325	7.2343	3.10467	8.31132	1.76935	1.91222	2.08187	1.98682	2.84822
[truncated: 19,142 more rows]

## Sheet: up- and down-regulated genes
coordinates	seqID	upreg_hpl2	upreg_let418ts	upreg_lin13	upreg_lin61	upreg_nrde2	upreg_nrde2let418ts	upreg_prg1	upreg_set25met2	downreg_hpl2	downreg_let418ts	downreg_lin13	downreg_lin61	downreg_nrde2	downreg_nrde2let418ts	downreg_prg1	downreg_set25met2
[truncated: 20,541 more rows]

[truncated: 1 more sheets: IDR peaks and H3K9me enrichment]
