# Supplementary material for: A team of heterochromatin factors collaborates with small RNA pathways to combat repetitive elements and germline stress
Source: eLife journal article supplement (doi:10.7554/elife.21666), 2017-03-15
Supplement: supp [file elife-21666-supp-v1.zip › elife_poa_e21666_Supplementary_File_1.xlsx]

## Sheet: Sheet1
Supplementary file 1
LET-418, LIN-13, HPL-2, LIN-61, and MET-2 are required for normal fertility.
mutant	Fertility 20°C	Fertility 25°C	Reference
let-418(null)	sterile	sterile	1
let-418(n3536)	normal	sterile	2
lin-13(null)	sterile	sterile	3
lin-13(n770)	reduced	sterile	4
hpl-2(tm1489)	reduced (13% sterile)	low (25% sterile)	5,6
lin-61(tm2649)	reduced	reduced	6
met-2(n4256)	reduced	reduced	6
Ref. 1: von Zelewsky et al. Development, 2000.
Ref .2: Ceol et al. Genetics, 2006.
Ref 3: Melendez et al, Genetics 2000.
Ref. 4: Thomas et al. Genetics, 2003.
Ref. 5: Schott et al, Dev Biol. 2006.
Ref. 6: Koester-Eiserfunke et al, PLoS Genet. 2011.
