# Supplementary material for: A team of heterochromatin factors collaborates with small RNA pathways to combat repetitive elements and germline stress
Source: eLife journal article supplement (doi:10.7554/elife.21666), 2017-03-15
Supplement: supp [file elife-21666-supp-v1.zip › elife_poa_e21666_Supplementary_File_2.xlsx]

## Sheet:  Strains and genotypes
Strain	Genotype
N2	C. elegans wild isolate
JA1902	hpl-2(tm1489) III
MT14390	let-418(n3536) V
MT8838	lin-13(n770) III
MT13293	met-2(n4256) III
GW638	met-2(n4256) set-25(n5021) III
JA1603	lin-61(tm2649) I
SX2818	prg-1(n4357) I
JA1751	lin-61(tm2649) I; hpl-2(tm1489) III
JA1754	hpl-2(tm1489) III; let-418(n3536) V
JA1776	lin-61(tm2646) I; lin-13(n770) III
MD701	bcIs39 [Plim-7::ced-1::gfp; lin-15(+)]
JA1741	hpl-2(tm1489); bcIs39 [Plim-7::ced-1::gfp; lin-15(+)]
JA1742	lin-13(n770); bcIs39[Plim-7::ced-1::gfp;lin-15(+)]
JA1743	lin-61(tm1489); bcIs39[Plim-7::ced-1::gfp;lin-15(+)]
JA1745	met-2(n4256); set-25(n5021); bcIs39[Plim-7::ced-1::gfp;lin-15(+)]
JA1746	prg-1(n4357); bcIs39[Plim-7::ced-1::gfp;lin-15(+)]
XY1054	cep-1(Ig12501) I
JA1766	cep-1(lg12501) I; let-418(n3536) V
JA1767	cep-1(lg12501) I; lin-13(n770) III
JA1768	cep-1(lg12501) I; hpl-2(tm1489) III
SX1316	mjIs144 [mex-5p::GFP::his-58::21UR-1target::tbb-2 3'UTR] II; unc-119(ed3) III
SX2424	mjIs144 II; lin-13(n770) III
SX2423	lin-61(n3809) I; mjIs144 II
SX2131	mjIs144 II; met-2(n4256) III
SX2175	mjIs144 II; set-25(n5021) III
JA1747	let-418(n3536) V; mjIs144
YY186	nrde-2(gg91) II
JA1723	nrde-2(gg91) II; let-418(n3536) V
JA1774	nrde-2(gg91) II; hpl-2(tm1489) III
JA1775	lin-61(tm2649) I; nrde-2(gg91) II
