# Supplementary material for: A team of heterochromatin factors collaborates with small RNA pathways to combat repetitive elements and germline stress
Source: eLife journal article supplement (doi:10.7554/elife.21666), 2017-03-15
Supplement: supp [file elife-21666-supp-v1.zip › elife_poa_e21666_Supplementary_File_3.xlsx]

## Sheet: Sheet1
Protein	Antibody	Source
HPL-2	Q2324 (38630002)	modENCODE project (Novus)
LET-418	Q3861 (48960002)	modENCODE project (Novus)
LIN-13	Q0838 (29570002)	modENCODE project (Novus)
LIN-61	Q3520	modENCODE project
MET-2	Q2943	modENCODE project
H3K9me3	ab8898	Abcam
H3K9me2	302-32369	WAKO
p-CHK-1	2348	Cell Signalling Technologies
