# Supplementary material for: A team of heterochromatin factors collaborates with small RNA pathways to combat repetitive elements and germline stress
Source: eLife journal article supplement (doi:10.7554/elife.21666), 2017-03-15
Supplement: supp [file elife_poa_e21666_Figure_2_source_data_1.xlsx]

## Sheet: column descriptions
Figure 1-source data 1. Column Descriptions
Any5 Concave Peaks
coordinates	coordinates of Any5 combined peak calls
HPL-2 peak	TRUE if HPL-2 concave peak call overlaps Any5
LET-418 peak	TRUE if LET-418 concave peak call overlaps Any5
LIN-13 peak	TRUE if LIN-13 concave peak call overlaps Any5
LIN-61 peak	TRUE if LIN-61 concave peak call overlaps Any5
MET-2 peak	TRUE if MET-2 concave peak call overlaps Any5
number of factors in region	Number of factor concave peak calls that overlap Any5 combined call
hit_repeat	TRUE if Any5 combined peak call overlaps a repetitive element
IDR peaks - separate sheets for each factor
chromosome	chromosome
start	start of peak
end	end of peak

## Sheet: Any5 concave peaks
coordinates	HPL-2 peak	LET-418 peak	LIN-13 peak	LIN-61 peak	MET-2 peak	number of factors in region	hit_repeat
chrI:1912-2445	TRUE	FALSE	TRUE	TRUE	TRUE	4	TRUE
chrI:2759-3109	FALSE	FALSE	FALSE	TRUE	FALSE	1	TRUE
chrI:3332-4034	TRUE	TRUE	TRUE	TRUE	TRUE	5	TRUE
chrI:4351-4751	TRUE	FALSE	TRUE	TRUE	FALSE	3	TRUE
chrI:4938-5113	TRUE	FALSE	FALSE	FALSE	FALSE	1	FALSE
chrI:7449-7717	FALSE	FALSE	FALSE	TRUE	FALSE	1	FALSE
chrI:7945-8545	TRUE	FALSE	TRUE	TRUE	FALSE	3	FALSE
chrI:9149-9508	FALSE	FALSE	TRUE	TRUE	TRUE	3	TRUE
chrI:10172-11071	TRUE	FALSE	TRUE	TRUE	FALSE	3	TRUE
chrI:11307-11904	FALSE	TRUE	FALSE	TRUE	FALSE	2	TRUE
chrI:12228-12735	TRUE	FALSE	TRUE	TRUE	TRUE	4	TRUE
chrI:12883-13525	TRUE	FALSE	FALSE	TRUE	TRUE	3	TRUE
chrI:13687-14074	TRUE	FALSE	TRUE	TRUE	TRUE	4	TRUE
chrI:14360-14730	TRUE	FALSE	FALSE	TRUE	FALSE	2	TRUE
chrI:14746-15217	FALSE	TRUE	TRUE	TRUE	TRUE	4	TRUE
chrI:15511-16376	TRUE	TRUE	TRUE	TRUE	TRUE	5	TRUE
chrI:16841-17272	TRUE	FALSE	TRUE	TRUE	TRUE	4	TRUE
chrI:20841-21466	TRUE	FALSE	FALSE	TRUE	FALSE	2	TRUE
chrI:21547-21967	FALSE	FALSE	FALSE	TRUE	FALSE	1	TRUE
chrI:22047-22522	TRUE	TRUE	TRUE	TRUE	TRUE	5	TRUE
chrI:22942-23214	FALSE	FALSE	FALSE	TRUE	FALSE	1	FALSE
chrI:23385-23765	FALSE	FALSE	FALSE	TRUE	FALSE	1	TRUE
chrI:24246-24717	TRUE	FALSE	TRUE	TRUE	TRUE	4	TRUE
chrI:25661-26152	TRUE	FALSE	FALSE	FALSE	FALSE	1	TRUE
chrI:27055-27374	FALSE	TRUE	TRUE	TRUE	TRUE	4	TRUE
chrI:28038-28396	FALSE	FALSE	TRUE	TRUE	FALSE	2	FALSE
chrI:31921-32341	FALSE	FALSE	FALSE	TRUE	FALSE	1	FALSE
chrI:33118-33424	FALSE	FALSE	FALSE	TRUE	FALSE	1	FALSE
chrI:33663-33927	TRUE	TRUE	FALSE	TRUE	TRUE	4	FALSE
chrI:34025-34447	TRUE	TRUE	TRUE	TRUE	TRUE	5	TRUE
chrI:34779-35135	TRUE	TRUE	TRUE	TRUE	TRUE	5	FALSE
chrI:35336-35589	FALSE	TRUE	FALSE	FALSE	FALSE	1	FALSE
chrI:36191-36482	FALSE	TRUE	TRUE	FALSE	FALSE	2	FALSE
chrI:36618-36899	FALSE	TRUE	TRUE	FALSE	FALSE	2	FALSE
chrI:37041-37336	TRUE	FALSE	TRUE	TRUE	FALSE	3	TRUE
chrI:37566-37852	TRUE	FALSE	TRUE	FALSE	FALSE	2	TRUE
chrI:38815-39263	FALSE	FALSE	TRUE	TRUE	FALSE	2	FALSE
chrI:39652-40477	TRUE	TRUE	TRUE	TRUE	FALSE	4	FALSE
chrI:40620-40906	FALSE	TRUE	TRUE	TRUE	FALSE	3	FALSE
chrI:40948-41375	TRUE	TRUE	TRUE	TRUE	TRUE	5	TRUE
chrI:41636-42459	TRUE	TRUE	TRUE	FALSE	FALSE	3	FALSE
chrI:43002-43561	TRUE	TRUE	TRUE	TRUE	TRUE	5	TRUE
chrI:44982-45317	FALSE	FALSE	FALSE	TRUE	FALSE	1	FALSE
chrI:46446-47312	TRUE	TRUE	TRUE	TRUE	TRUE	5	TRUE
chrI:50333-50793	TRUE	FALSE	TRUE	FALSE	FALSE	2	TRUE
chrI:51341-52373	TRUE	FALSE	TRUE	TRUE	FALSE	3	TRUE
chrI:52473-52700	FALSE	FALSE	FALSE	FALSE	TRUE	1	TRUE
chrI:52938-53388	FALSE	FALSE	TRUE	TRUE	FALSE	2	TRUE
chrI:54622-55065	FALSE	FALSE	TRUE	FALSE	FALSE	1	TRUE
chrI:55475-55824	FALSE	FALSE	TRUE	FALSE	FALSE	1	TRUE
chrI:65082-65392	FALSE	FALSE	TRUE	TRUE	FALSE	2	FALSE
chrI:66269-66683	FALSE	FALSE	FALSE	TRUE	FALSE	1	FALSE
chrI:67037-67271	FALSE	FALSE	FALSE	TRUE	FALSE	1	FALSE
chrI:67426-67973	TRUE	FALSE	TRUE	TRUE	TRUE	4	TRUE
chrI:69870-70359	FALSE	TRUE	TRUE	TRUE	TRUE	4	FALSE
chrI:70481-70999	FALSE	FALSE	TRUE	FALSE	FALSE	1	TRUE
chrI:71387-72014	FALSE	FALSE	TRUE	TRUE	FALSE	2	TRUE
chrI:77855-78259	FALSE	FALSE	TRUE	TRUE	FALSE	2	FALSE
chrI:80332-81016	TRUE	FALSE	TRUE	TRUE	FALSE	3	TRUE
chrI:81182-81485	FALSE	FALSE	TRUE	TRUE	FALSE	2	TRUE
chrI:82118-82400	FALSE	FALSE	TRUE	FALSE	FALSE	1	FALSE
chrI:85812-86610	TRUE	FALSE	FALSE	TRUE	TRUE	3	TRUE
chrI:87030-87253	FALSE	FALSE	FALSE	TRUE	FALSE	1	TRUE
chrI:87675-88146	FALSE	TRUE	TRUE	TRUE	TRUE	4	TRUE
chrI:90411-91307	TRUE	FALSE	TRUE	TRUE	TRUE	4	TRUE
chrI:91523-91891	FALSE	FALSE	TRUE	TRUE	TRUE	3	FALSE
chrI:91952-92536	TRUE	TRUE	TRUE	TRUE	TRUE	5	FALSE
chrI:92762-93188	TRUE	TRUE	TRUE	TRUE	TRUE	5	FALSE
chrI:94319-94639	FALSE	FALSE	FALSE	TRUE	FALSE	1	FALSE
chrI:94922-95312	FALSE	FALSE	TRUE	TRUE	TRUE	3	FALSE
chrI:96050-96691	TRUE	TRUE	TRUE	TRUE	TRUE	5	TRUE
chrI:97984-98331	FALSE	FALSE	TRUE	FALSE	FALSE	1	TRUE
chrI:99664-100245	FALSE	FALSE	TRUE	FALSE	FALSE	1	TRUE
chrI:104866-105043	TRUE	FALSE	FALSE	FALSE	FALSE	1	TRUE
chrI:108335-108744	TRUE	TRUE	TRUE	TRUE	TRUE	5	FALSE
chrI:109697-110302	TRUE	FALSE	FALSE	TRUE	FALSE	2	FALSE
chrI:110513-110910	TRUE	TRUE	TRUE	TRUE	TRUE	5	TRUE
chrI:111121-111456	FALSE	FALSE	FALSE	TRUE	TRUE	2	FALSE
chrI:111986-112528	FALSE	FALSE	FALSE	TRUE	TRUE	2	FALSE
chrI:112798-113187	TRUE	FALSE	TRUE	FALSE	FALSE	2	FALSE
chrI:113275-113683	FALSE	TRUE	TRUE	TRUE	TRUE	4	FALSE
chrI:113790-114435	TRUE	FALSE	TRUE	TRUE	FALSE	3	FALSE
chrI:114667-115393	TRUE	TRUE	TRUE	TRUE	TRUE	5	TRUE
chrI:123121-123592	FALSE	FALSE	TRUE	FALSE	FALSE	1	FALSE
chrI:126925-127243	TRUE	FALSE	TRUE	FALSE	FALSE	2	TRUE
chrI:128188-128794	TRUE	TRUE	TRUE	TRUE	TRUE	5	FALSE
chrI:128839-129293	FALSE	FALSE	FALSE	TRUE	FALSE	1	FALSE
chrI:129587-130663	TRUE	FALSE	FALSE	TRUE	FALSE	2	FALSE
chrI:130872-131147	FALSE	FALSE	FALSE	TRUE	FALSE	1	FALSE
chrI:131456-131667	FALSE	FALSE	FALSE	TRUE	FALSE	1	TRUE
chrI:131979-132389	FALSE	FALSE	FALSE	TRUE	FALSE	1	TRUE
chrI:132953-133337	TRUE	FALSE	FALSE	FALSE	FALSE	1	FALSE
chrI:133353-133725	FALSE	FALSE	FALSE	TRUE	FALSE	1	FALSE
chrI:134114-134539	FALSE	FALSE	FALSE	TRUE	FALSE	1	FALSE
chrI:134724-135162	FALSE	FALSE	TRUE	FALSE	TRUE	2	TRUE
chrI:136673-137093	FALSE	FALSE	TRUE	TRUE	TRUE	3	FALSE
chrI:137538-137869	FALSE	FALSE	TRUE	FALSE	FALSE	1	FALSE
chrI:156144-156554	FALSE	FALSE	TRUE	FALSE	FALSE	1	FALSE
chrI:160113-160438	FALSE	FALSE	TRUE	FALSE	FALSE	1	FALSE
chrI:160685-160945	FALSE	FALSE	TRUE	FALSE	FALSE	1	FALSE
chrI:166050-166680	TRUE	FALSE	TRUE	FALSE	FALSE	2	FALSE
chrI:166685-166992	FALSE	FALSE	TRUE	FALSE	FALSE	1	FALSE
chrI:167204-167482	FALSE	FALSE	TRUE	FALSE	FALSE	1	FALSE
chrI:168016-168320	FALSE	FALSE	TRUE	FALSE	TRUE	2	FALSE
chrI:171282-171601	FALSE	FALSE	TRUE	FALSE	FALSE	1	FALSE
chrI:171989-172333	FALSE	TRUE	TRUE	TRUE	TRUE	4	TRUE
chrI:179011-179358	TRUE	TRUE	TRUE	TRUE	TRUE	5	TRUE
chrI:179499-179782	TRUE	TRUE	TRUE	TRUE	FALSE	4	FALSE
chrI:179959-180232	FALSE	FALSE	FALSE	FALSE	TRUE	1	FALSE
chrI:180433-181013	TRUE	FALSE	FALSE	TRUE	FALSE	2	TRUE
chrI:182810-183187	TRUE	TRUE	TRUE	TRUE	TRUE	5	TRUE
chrI:183320-183586	FALSE	FALSE	FALSE	TRUE	FALSE	1	FALSE
chrI:183863-184144	FALSE	FALSE	FALSE	TRUE	FALSE	1	FALSE
chrI:184337-185058	TRUE	FALSE	FALSE	TRUE	FALSE	2	TRUE
chrI:185129-185557	FALSE	TRUE	FALSE	TRUE	FALSE	2	TRUE
chrI:185740-185969	FALSE	FALSE	FALSE	TRUE	FALSE	1	TRUE
chrI:186382-186844	FALSE	FALSE	FALSE	TRUE	FALSE	1	TRUE
chrI:187153-187465	FALSE	FALSE	FALSE	TRUE	FALSE	1	TRUE
chrI:188132-188752	TRUE	FALSE	FALSE	TRUE	TRUE	3	TRUE
chrI:188825-189043	TRUE	FALSE	FALSE	FALSE	FALSE	1	FALSE
chrI:189052-189560	TRUE	FALSE	FALSE	TRUE	FALSE	2	FALSE
chrI:189619-189962	FALSE	FALSE	FALSE	TRUE	FALSE	1	TRUE
chrI:190104-190413	TRUE	FALSE	FALSE	FALSE	FALSE	1	TRUE
chrI:190497-190975	FALSE	FALSE	FALSE	TRUE	FALSE	1	FALSE
chrI:191267-191851	FALSE	FALSE	FALSE	TRUE	FALSE	1	TRUE
chrI:192282-192592	TRUE	FALSE	FALSE	FALSE	FALSE	1	TRUE
chrI:198513-198747	TRUE	FALSE	FALSE	FALSE	FALSE	1	TRUE
chrI:198866-199572	FALSE	FALSE	FALSE	TRUE	FALSE	1	TRUE
chrI:199687-199928	TRUE	FALSE	FALSE	FALSE	FALSE	1	TRUE
chrI:199941-200522	FALSE	FALSE	FALSE	TRUE	FALSE	1	TRUE
chrI:200606-200942	TRUE	FALSE	FALSE	FALSE	FALSE	1	TRUE
chrI:201725-202036	TRUE	FALSE	FALSE	FALSE	FALSE	1	TRUE
chrI:202080-202327	TRUE	FALSE	FALSE	FALSE	FALSE	1	FALSE
chrI:204865-205107	TRUE	FALSE	FALSE	FALSE	FALSE	1	FALSE
chrI:205576-206178	TRUE	FALSE	TRUE	TRUE	FALSE	3	TRUE
chrI:210455-210783	FALSE	FALSE	TRUE	FALSE	FALSE	1	FALSE
chrI:211084-211594	FALSE	FALSE	TRUE	TRUE	TRUE	3	TRUE
chrI:214359-214719	TRUE	FALSE	FALSE	FALSE	FALSE	1	TRUE
chrI:214912-215206	FALSE	FALSE	FALSE	TRUE	FALSE	1	FALSE
chrI:215479-216088	FALSE	FALSE	TRUE	TRUE	TRUE	3	TRUE
chrI:216919-217391	FALSE	FALSE	FALSE	TRUE	FALSE	1	TRUE
chrI:217693-218277	FALSE	FALSE	TRUE	TRUE	TRUE	3	TRUE
chrI:218671-218965	FALSE	FALSE	FALSE	TRUE	TRUE	2	FALSE
chrI:219096-219933	TRUE	TRUE	TRUE	TRUE	TRUE	5	FALSE
chrI:220012-220342	FALSE	TRUE	TRUE	TRUE	FALSE	3	TRUE
chrI:220351-221067	TRUE	FALSE	TRUE	TRUE	FALSE	3	TRUE
chrI:222172-222344	TRUE	FALSE	FALSE	FALSE	FALSE	1	TRUE
chrI:222647-222993	TRUE	TRUE	TRUE	TRUE	TRUE	5	TRUE
chrI:223056-223355	TRUE	FALSE	FALSE	FALSE	TRUE	2	TRUE
chrI:226532-226989	FALSE	FALSE	FALSE	TRUE	TRUE	2	FALSE
chrI:227136-227482	FALSE	FALSE	TRUE	FALSE	TRUE	2	TRUE
chrI:229077-229495	TRUE	FALSE	FALSE	TRUE	TRUE	3	FALSE
chrI:229617-230103	TRUE	FALSE	FALSE	TRUE	TRUE	3	FALSE
chrI:230428-230896	FALSE	FALSE	TRUE	TRUE	FALSE	2	FALSE
chrI:231296-231531	FALSE	FALSE	FALSE	TRUE	FALSE	1	FALSE
chrI:231858-232226	TRUE	FALSE	TRUE	TRUE	TRUE	4	FALSE
chrI:232418-232973	FALSE	TRUE	TRUE	TRUE	TRUE	4	TRUE
chrI:233368-233671	FALSE	FALSE	FALSE	TRUE	FALSE	1	TRUE
chrI:233966-234547	TRUE	FALSE	FALSE	TRUE	FALSE	2	TRUE
chrI:234786-235091	FALSE	FALSE	FALSE	TRUE	TRUE	2	TRUE
chrI:235763-236073	FALSE	FALSE	FALSE	TRUE	FALSE	1	TRUE
chrI:236426-236763	FALSE	FALSE	FALSE	TRUE	FALSE	1	TRUE
chrI:237422-238635	TRUE	TRUE	TRUE	TRUE	TRUE	5	TRUE
chrI:238898-239240	FALSE	FALSE	TRUE	TRUE	TRUE	3	FALSE
chrI:247599-247991	FALSE	FALSE	TRUE	FALSE	FALSE	1	TRUE
chrI:248145-248337	FALSE	FALSE	FALSE	TRUE	FALSE	1	TRUE
chrI:248539-248952	FALSE	FALSE	FALSE	TRUE	TRUE	2	FALSE
chrI:249185-249571	FALSE	FALSE	TRUE	TRUE	TRUE	3	TRUE
chrI:249618-249957	FALSE	FALSE	FALSE	TRUE	FALSE	1	TRUE
chrI:249969-250293	TRUE	FALSE	FALSE	FALSE	FALSE	1	FALSE
chrI:250422-250787	FALSE	FALSE	TRUE	TRUE	TRUE	3	TRUE
chrI:251010-251362	FALSE	FALSE	FALSE	TRUE	FALSE	1	FALSE
chrI:251575-252164	TRUE	FALSE	TRUE	TRUE	TRUE	4	TRUE
chrI:253230-253453	FALSE	FALSE	FALSE	TRUE	FALSE	1	FALSE
chrI:253740-254043	FALSE	FALSE	FALSE	TRUE	FALSE	1	TRUE
chrI:254645-255340	FALSE	TRUE	TRUE	TRUE	FALSE	3	TRUE
chrI:258742-259089	FALSE	FALSE	TRUE	FALSE	FALSE	1	FALSE
chrI:260499-260850	TRUE	FALSE	TRUE	FALSE	FALSE	2	TRUE
chrI:261132-261736	TRUE	FALSE	TRUE	FALSE	FALSE	2	FALSE
chrI:262134-262583	TRUE	TRUE	TRUE	TRUE	FALSE	4	FALSE
chrI:263032-263269	FALSE	FALSE	TRUE	FALSE	FALSE	1	FALSE
chrI:263554-264190	FALSE	FALSE	TRUE	TRUE	FALSE	2	TRUE
chrI:267603-267890	FALSE	FALSE	TRUE	FALSE	FALSE	1	FALSE
chrI:276267-276516	FALSE	FALSE	TRUE	FALSE	FALSE	1	FALSE
chrI:277079-277874	FALSE	TRUE	TRUE	FALSE	FALSE	2	FALSE
chrI:278380-278650	FALSE	FALSE	TRUE	FALSE	FALSE	1	TRUE
chrI:279219-279422	FALSE	FALSE	TRUE	FALSE	FALSE	1	TRUE
chrI:279560-279969	TRUE	TRUE	TRUE	TRUE	TRUE	5	TRUE
chrI:280152-280888	TRUE	TRUE	TRUE	TRUE	FALSE	4	TRUE
chrI:281478-282237	TRUE	TRUE	TRUE	TRUE	TRUE	5	TRUE
chrI:283785-284133	FALSE	FALSE	TRUE	FALSE	FALSE	1	TRUE
chrI:284492-284768	FALSE	FALSE	TRUE	FALSE	FALSE	1	FALSE
chrI:285099-285475	FALSE	TRUE	TRUE	TRUE	TRUE	4	TRUE
chrI:286567-286878	FALSE	TRUE	TRUE	TRUE	FALSE	3	FALSE
chrI:287158-287815	FALSE	TRUE	TRUE	TRUE	FALSE	3	TRUE
chrI:289050-289406	FALSE	TRUE	TRUE	FALSE	FALSE	2	FALSE
chrI:290021-290293	TRUE	FALSE	FALSE	FALSE	FALSE	1	TRUE
chrI:290686-291011	TRUE	FALSE	TRUE	FALSE	FALSE	2	TRUE
chrI:297370-298233	TRUE	TRUE	FALSE	FALSE	FALSE	2	TRUE
chrI:298392-298808	FALSE	TRUE	FALSE	FALSE	FALSE	1	FALSE
chrI:299386-299672	FALSE	TRUE	FALSE	FALSE	FALSE	1	TRUE
chrI:299835-300161	FALSE	TRUE	FALSE	TRUE	FALSE	2	TRUE
chrI:300482-300821	FALSE	FALSE	FALSE	TRUE	FALSE	1	TRUE
chrI:301252-301604	FALSE	FALSE	TRUE	TRUE	FALSE	2	TRUE
chrI:304136-304492	FALSE	TRUE	TRUE	FALSE	TRUE	3	TRUE
chrI:305649-306004	FALSE	FALSE	TRUE	FALSE	FALSE	1	FALSE
chrI:306508-307148	FALSE	FALSE	TRUE	FALSE	FALSE	1	FALSE
chrI:307892-308227	TRUE	FALSE	TRUE	TRUE	FALSE	3	TRUE
chrI:308717-309033	FALSE	FALSE	TRUE	TRUE	FALSE	2	TRUE
chrI:309322-309524	FALSE	FALSE	TRUE	FALSE	FALSE	1	FALSE
chrI:309702-310107	TRUE	FALSE	TRUE	TRUE	TRUE	4	TRUE
chrI:310440-311113	TRUE	TRUE	TRUE	TRUE	TRUE	5	TRUE
chrI:315040-315410	TRUE	TRUE	TRUE	TRUE	TRUE	5	FALSE
chrI:315713-316415	TRUE	TRUE	TRUE	TRUE	TRUE	5	TRUE
chrI:318103-318577	TRUE	TRUE	TRUE	TRUE	TRUE	5	TRUE
chrI:318864-319110	FALSE	FALSE	FALSE	TRUE	FALSE	1	FALSE
chrI:320487-320983	TRUE	FALSE	FALSE	FALSE	FALSE	1	TRUE
chrI:323301-323785	TRUE	FALSE	TRUE	TRUE	TRUE	4	FALSE
chrI:327332-327716	TRUE	FALSE	FALSE	FALSE	FALSE	1	FALSE
chrI:328397-328881	TRUE	TRUE	TRUE	TRUE	FALSE	4	TRUE
chrI:328897-329458	TRUE	FALSE	FALSE	TRUE	FALSE	2	FALSE
chrI:329691-330009	TRUE	FALSE	FALSE	TRUE	FALSE	2	FALSE
chrI:330180-330726	FALSE	FALSE	FALSE	TRUE	FALSE	1	FALSE
chrI:330735-330919	TRUE	FALSE	FALSE	FALSE	FALSE	1	FALSE
chrI:331195-331752	TRUE	FALSE	FALSE	TRUE	FALSE	2	TRUE
chrI:332054-332895	TRUE	FALSE	TRUE	TRUE	TRUE	4	TRUE
chrI:333090-334063	TRUE	FALSE	TRUE	TRUE	FALSE	3	TRUE
chrI:335688-335907	TRUE	FALSE	FALSE	FALSE	FALSE	1	FALSE
chrI:336366-336668	FALSE	FALSE	FALSE	TRUE	FALSE	1	FALSE
chrI:336750-337349	TRUE	FALSE	FALSE	TRUE	TRUE	3	FALSE
chrI:337562-337948	FALSE	FALSE	FALSE	TRUE	TRUE	2	FALSE
chrI:338439-338730	FALSE	FALSE	FALSE	TRUE	FALSE	1	FALSE
chrI:338996-339303	FALSE	FALSE	FALSE	TRUE	FALSE	1	FALSE
chrI:339638-340086	FALSE	FALSE	FALSE	TRUE	FALSE	1	FALSE
chrI:340578-341213	TRUE	FALSE	FALSE	TRUE	TRUE	3	TRUE
chrI:342108-342423	FALSE	FALSE	TRUE	TRUE	FALSE	2	TRUE
chrI:342611-343173	FALSE	FALSE	TRUE	TRUE	TRUE	3	TRUE
chrI:343510-343851	FALSE	FALSE	TRUE	TRUE	FALSE	2	FALSE
chrI:344462-344859	TRUE	FALSE	TRUE	FALSE	FALSE	2	TRUE
chrI:347094-347574	TRUE	FALSE	FALSE	FALSE	TRUE	2	TRUE
chrI:348314-348719	FALSE	TRUE	TRUE	FALSE	FALSE	2	TRUE
chrI:349540-349882	FALSE	FALSE	TRUE	FALSE	FALSE	1	TRUE
chrI:352385-352602	FALSE	FALSE	TRUE	FALSE	FALSE	1	TRUE
chrI:353274-353622	FALSE	TRUE	TRUE	TRUE	TRUE	4	TRUE
chrI:354740-355268	TRUE	TRUE	TRUE	TRUE	TRUE	5	TRUE
chrI:355732-356109	TRUE	TRUE	TRUE	TRUE	TRUE	5	FALSE
chrI:356170-356712	TRUE	TRUE	TRUE	TRUE	TRUE	5	TRUE
chrI:358751-359158	TRUE	FALSE	TRUE	TRUE	TRUE	4	TRUE
chrI:359505-359699	FALSE	FALSE	TRUE	FALSE	FALSE	1	TRUE
chrI:359879-360303	TRUE	TRUE	TRUE	TRUE	FALSE	4	TRUE
chrI:360698-360951	FALSE	FALSE	FALSE	TRUE	FALSE	1	FALSE
chrI:361271-361528	FALSE	FALSE	FALSE	TRUE	FALSE	1	FALSE
chrI:361649-362158	FALSE	FALSE	TRUE	TRUE	FALSE	2	TRUE
chrI:363956-364522	FALSE	FALSE	TRUE	TRUE	TRUE	3	FALSE
chrI:365291-365628	TRUE	FALSE	FALSE	FALSE	FALSE	1	TRUE
chrI:366186-366625	TRUE	FALSE	TRUE	TRUE	TRUE	4	TRUE
chrI:367262-367627	FALSE	FALSE	TRUE	TRUE	FALSE	2	TRUE
chrI:368164-368711	TRUE	FALSE	TRUE	FALSE	TRUE	3	TRUE
chrI:369286-369582	FALSE	FALSE	TRUE	TRUE	FALSE	2	TRUE
chrI:369914-370390	TRUE	TRUE	TRUE	TRUE	FALSE	4	FALSE
chrI:372534-372837	FALSE	FALSE	TRUE	FALSE	FALSE	1	TRUE
chrI:373014-373580	TRUE	FALSE	TRUE	TRUE	FALSE	3	TRUE
chrI:377422-377741	FALSE	TRUE	TRUE	TRUE	TRUE	4	TRUE
chrI:377938-378447	FALSE	TRUE	TRUE	TRUE	TRUE	4	TRUE
chrI:378840-379183	TRUE	FALSE	FALSE	TRUE	TRUE	3	FALSE
chrI:381237-382038	TRUE	FALSE	FALSE	TRUE	FALSE	2	FALSE
chrI:382118-382345	TRUE	FALSE	FALSE	FALSE	FALSE	1	FALSE
chrI:382354-382841	TRUE	TRUE	TRUE	TRUE	TRUE	5	TRUE
chrI:385494-385844	TRUE	FALSE	TRUE	TRUE	TRUE	4	TRUE
chrI:388902-389299	TRUE	TRUE	TRUE	TRUE	TRUE	5	TRUE
chrI:389743-390232	FALSE	FALSE	TRUE	FALSE	FALSE	1	TRUE
chrI:391873-392224	FALSE	FALSE	TRUE	FALSE	FALSE	1	TRUE
chrI:393788-394188	FALSE	TRUE	TRUE	TRUE	TRUE	4	TRUE
chrI:395177-395597	FALSE	TRUE	TRUE	TRUE	TRUE	4	FALSE
chrI:395826-396446	TRUE	FALSE	TRUE	FALSE	FALSE	2	TRUE
chrI:396778-397169	TRUE	TRUE	TRUE	TRUE	TRUE	5	TRUE
chrI:397485-398195	TRUE	TRUE	TRUE	TRUE	TRUE	5	TRUE
chrI:398413-398755	TRUE	FALSE	TRUE	FALSE	TRUE	3	TRUE
chrI:399487-400052	TRUE	FALSE	TRUE	TRUE	FALSE	3	TRUE
chrI:402516-402883	TRUE	FALSE	FALSE	FALSE	FALSE	1	TRUE
chrI:404344-404667	TRUE	FALSE	TRUE	FALSE	FALSE	2	TRUE
chrI:405459-405837	TRUE	FALSE	FALSE	FALSE	FALSE	1	TRUE
chrI:408966-409368	TRUE	FALSE	TRUE	FALSE	FALSE	2	TRUE
chrI:412951-413433	FALSE	FALSE	TRUE	TRUE	TRUE	3	TRUE
chrI:413660-413962	FALSE	FALSE	TRUE	TRUE	FALSE	2	TRUE
chrI:414272-414676	FALSE	TRUE	TRUE	TRUE	FALSE	3	TRUE
chrI:416226-416593	FALSE	FALSE	TRUE	FALSE	FALSE	1	FALSE
chrI:417566-417898	FALSE	FALSE	TRUE	FALSE	FALSE	1	FALSE
chrI:418636-419085	FALSE	FALSE	TRUE	FALSE	FALSE	1	TRUE
chrI:419288-419509	FALSE	FALSE	TRUE	FALSE	FALSE	1	FALSE
chrI:420045-420359	FALSE	FALSE	TRUE	FALSE	FALSE	1	FALSE
chrI:432036-432384	FALSE	TRUE	TRUE	TRUE	TRUE	4	TRUE
chrI:433323-433996	FALSE	TRUE	FALSE	FALSE	FALSE	1	TRUE
chrI:434529-434885	FALSE	TRUE	FALSE	FALSE	FALSE	1	FALSE
chrI:435506-435867	FALSE	TRUE	FALSE	FALSE	FALSE	1	FALSE
chrI:436078-436450	TRUE	FALSE	TRUE	TRUE	FALSE	3	FALSE
chrI:442752-443232	FALSE	FALSE	TRUE	FALSE	FALSE	1	TRUE
chrI:443497-443921	FALSE	FALSE	TRUE	FALSE	TRUE	2	TRUE
chrI:447370-447782	TRUE	FALSE	TRUE	FALSE	FALSE	2	TRUE
chrI:448627-448944	FALSE	FALSE	FALSE	TRUE	FALSE	1	FALSE
chrI:449086-449755	FALSE	FALSE	TRUE	TRUE	FALSE	2	TRUE
chrI:452495-453105	FALSE	FALSE	FALSE	TRUE	FALSE	1	TRUE
chrI:453504-453856	FALSE	FALSE	FALSE	TRUE	FALSE	1	FALSE
chrI:454823-455677	FALSE	FALSE	FALSE	TRUE	FALSE	1	TRUE
chrI:458323-458568	FALSE	FALSE	FALSE	TRUE	FALSE	1	FALSE
chrI:458717-459015	FALSE	FALSE	TRUE	TRUE	FALSE	2	TRUE
chrI:459333-459631	FALSE	FALSE	TRUE	FALSE	FALSE	1	TRUE
chrI:461507-461902	TRUE	TRUE	TRUE	FALSE	TRUE	4	TRUE
chrI:462745-463437	TRUE	TRUE	TRUE	TRUE	TRUE	5	TRUE
chrI:463801-464265	FALSE	TRUE	TRUE	TRUE	TRUE	4	TRUE
chrI:464612-465067	FALSE	TRUE	TRUE	TRUE	TRUE	4	FALSE
chrI:465408-465663	FALSE	FALSE	TRUE	FALSE	TRUE	2	FALSE
chrI:465859-466123	FALSE	FALSE	TRUE	FALSE	FALSE	1	FALSE
chrI:466591-467149	FALSE	TRUE	TRUE	TRUE	TRUE	4	FALSE
chrI:467668-468235	FALSE	FALSE	TRUE	FALSE	FALSE	1	FALSE
chrI:468633-469003	FALSE	FALSE	TRUE	FALSE	FALSE	1	FALSE
chrI:469688-470311	FALSE	FALSE	TRUE	FALSE	FALSE	1	TRUE
chrI:476795-477206	FALSE	FALSE	TRUE	FALSE	FALSE	1	TRUE
chrI:477865-478126	FALSE	FALSE	TRUE	FALSE	FALSE	1	FALSE
chrI:478985-479308	FALSE	FALSE	TRUE	FALSE	FALSE	1	FALSE
chrI:479429-479819	FALSE	FALSE	TRUE	FALSE	FALSE	1	FALSE
chrI:480408-480756	FALSE	FALSE	TRUE	FALSE	FALSE	1	TRUE
chrI:481180-481473	FALSE	FALSE	TRUE	FALSE	FALSE	1	TRUE
chrI:481707-481929	FALSE	FALSE	TRUE	FALSE	FALSE	1	TRUE
chrI:482141-482510	FALSE	FALSE	TRUE	FALSE	FALSE	1	FALSE
chrI:483112-483398	FALSE	FALSE	TRUE	FALSE	FALSE	1	TRUE
chrI:483605-483906	FALSE	FALSE	TRUE	FALSE	FALSE	1	FALSE
chrI:484291-484545	FALSE	FALSE	TRUE	FALSE	FALSE	1	TRUE
chrI:484823-485303	FALSE	FALSE	TRUE	FALSE	FALSE	1	FALSE
chrI:485674-485953	FALSE	FALSE	TRUE	FALSE	FALSE	1	TRUE
chrI:486178-486463	TRUE	FALSE	TRUE	FALSE	FALSE	2	TRUE
chrI:486747-486934	FALSE	FALSE	TRUE	FALSE	FALSE	1	TRUE
chrI:487186-487679	TRUE	TRUE	TRUE	TRUE	TRUE	5	TRUE
chrI:488258-488595	FALSE	TRUE	TRUE	TRUE	TRUE	4	FALSE
chrI:489253-489776	TRUE	TRUE	TRUE	TRUE	TRUE	5	TRUE
chrI:490129-490547	TRUE	TRUE	TRUE	TRUE	TRUE	5	TRUE
chrI:490745-491148	TRUE	FALSE	TRUE	TRUE	TRUE	4	TRUE
chrI:491328-491521	FALSE	FALSE	TRUE	FALSE	FALSE	1	FALSE
chrI:492443-492799	FALSE	FALSE	TRUE	FALSE	FALSE	1	TRUE
chrI:493839-494238	TRUE	FALSE	TRUE	TRUE	TRUE	4	TRUE
chrI:494657-495003	FALSE	FALSE	TRUE	TRUE	FALSE	2	TRUE
chrI:495205-495602	TRUE	FALSE	TRUE	TRUE	FALSE	3	TRUE
chrI:495831-496063	FALSE	FALSE	FALSE	TRUE	FALSE	1	FALSE
chrI:496313-496622	FALSE	FALSE	FALSE	TRUE	FALSE	1	TRUE
chrI:497259-497584	FALSE	FALSE	TRUE	TRUE	TRUE	3	TRUE
chrI:497924-498255	TRUE	FALSE	FALSE	FALSE	FALSE	1	TRUE
chrI:498557-498828	FALSE	FALSE	TRUE	FALSE	FALSE	1	TRUE
chrI:500297-500766	TRUE	FALSE	TRUE	TRUE	TRUE	4	TRUE
chrI:500905-501496	TRUE	FALSE	TRUE	TRUE	TRUE	4	TRUE
chrI:502136-502969	TRUE	TRUE	TRUE	TRUE	TRUE	5	TRUE
chrI:504542-505014	TRUE	FALSE	TRUE	TRUE	TRUE	4	TRUE
chrI:505311-505691	TRUE	FALSE	FALSE	FALSE	FALSE	1	TRUE
chrI:506166-506532	TRUE	TRUE	TRUE	FALSE	TRUE	4	FALSE
chrI:509381-509705	FALSE	FALSE	TRUE	FALSE	FALSE	1	TRUE
chrI:509854-510189	TRUE	FALSE	TRUE	TRUE	TRUE	4	TRUE
chrI:510398-510991	FALSE	TRUE	TRUE	TRUE	TRUE	4	TRUE
chrI:511008-511354	TRUE	FALSE	FALSE	FALSE	FALSE	1	FALSE
chrI:511604-512507	TRUE	FALSE	FALSE	TRUE	TRUE	3	TRUE
chrI:513199-513544	FALSE	TRUE	FALSE	FALSE	FALSE	1	FALSE
chrI:514062-514615	FALSE	FALSE	FALSE	TRUE	TRUE	2	TRUE
chrI:514711-516135	TRUE	TRUE	FALSE	TRUE	TRUE	4	TRUE
chrI:516258-516999	TRUE	TRUE	TRUE	TRUE	TRUE	5	FALSE
chrI:517060-517853	TRUE	FALSE	TRUE	TRUE	FALSE	3	TRUE
chrI:518178-519325	TRUE	TRUE	TRUE	TRUE	TRUE	5	TRUE
chrI:519802-520168	TRUE	TRUE	TRUE	TRUE	TRUE	5	TRUE
chrI:520457-521076	TRUE	TRUE	TRUE	TRUE	TRUE	5	TRUE
chrI:525057-525474	TRUE	FALSE	TRUE	FALSE	FALSE	2	TRUE
chrI:533272-533879	FALSE	FALSE	TRUE	TRUE	TRUE	3	TRUE
chrI:534198-534459	FALSE	FALSE	TRUE	TRUE	TRUE	3	FALSE
chrI:535290-535651	TRUE	TRUE	TRUE	TRUE	TRUE	5	TRUE
chrI:535835-536097	FALSE	FALSE	FALSE	TRUE	FALSE	1	FALSE
chrI:536675-537091	TRUE	TRUE	TRUE	TRUE	TRUE	5	FALSE
chrI:537743-538927	TRUE	TRUE	FALSE	TRUE	TRUE	4	FALSE
chrI:542233-543307	TRUE	TRUE	TRUE	TRUE	TRUE	5	TRUE
chrI:543592-543899	FALSE	FALSE	TRUE	TRUE	TRUE	3	TRUE
chrI:544492-544865	TRUE	FALSE	TRUE	TRUE	FALSE	3	FALSE
chrI:545171-545663	TRUE	TRUE	TRUE	TRUE	TRUE	5	TRUE
chrI:545987-546413	TRUE	TRUE	TRUE	FALSE	FALSE	3	TRUE
chrI:546785-547322	TRUE	FALSE	TRUE	FALSE	FALSE	2	TRUE
chrI:547661-548046	TRUE	TRUE	TRUE	TRUE	TRUE	5	TRUE
chrI:548489-549382	TRUE	TRUE	TRUE	TRUE	TRUE	5	TRUE
chrI:549575-549901	TRUE	TRUE	TRUE	TRUE	FALSE	4	FALSE
chrI:550016-550328	FALSE	TRUE	TRUE	TRUE	FALSE	3	FALSE
chrI:551018-551361	TRUE	FALSE	TRUE	TRUE	FALSE	3	TRUE
chrI:551430-551725	TRUE	FALSE	TRUE	FALSE	FALSE	2	TRUE
chrI:557665-558292	FALSE	FALSE	TRUE	FALSE	TRUE	2	TRUE
chrI:560874-561306	TRUE	FALSE	TRUE	TRUE	TRUE	4	TRUE
chrI:564153-564510	FALSE	FALSE	TRUE	FALSE	TRUE	2	TRUE
chrI:565496-565856	FALSE	FALSE	TRUE	FALSE	FALSE	1	FALSE
chrI:568017-568265	FALSE	FALSE	TRUE	FALSE	FALSE	1	TRUE
chrI:576058-576459	FALSE	FALSE	TRUE	FALSE	FALSE	1	TRUE
chrI:584681-584947	FALSE	FALSE	TRUE	FALSE	FALSE	1	TRUE
chrI:585854-586167	FALSE	FALSE	TRUE	FALSE	FALSE	1	FALSE
chrI:586352-586682	FALSE	FALSE	TRUE	FALSE	FALSE	1	TRUE
chrI:592722-593264	FALSE	FALSE	TRUE	FALSE	FALSE	1	TRUE
chrI:596858-597304	FALSE	TRUE	TRUE	TRUE	TRUE	4	TRUE
chrI:604663-604955	FALSE	FALSE	TRUE	FALSE	FALSE	1	FALSE
chrI:605281-605662	FALSE	FALSE	TRUE	FALSE	FALSE	1	TRUE
chrI:606923-607346	TRUE	FALSE	TRUE	FALSE	TRUE	3	TRUE
chrI:607665-608106	FALSE	FALSE	TRUE	FALSE	FALSE	1	TRUE
chrI:608428-608855	FALSE	TRUE	TRUE	TRUE	FALSE	3	FALSE
chrI:609484-609872	FALSE	TRUE	TRUE	TRUE	TRUE	4	FALSE
chrI:610281-610555	FALSE	FALSE	TRUE	FALSE	FALSE	1	FALSE
chrI:610994-611387	FALSE	TRUE	TRUE	TRUE	FALSE	3	FALSE
chrI:611864-612195	FALSE	FALSE	TRUE	FALSE	FALSE	1	TRUE
chrI:612766-613072	FALSE	TRUE	TRUE	FALSE	FALSE	2	TRUE
chrI:613290-613666	FALSE	TRUE	TRUE	FALSE	FALSE	2	TRUE
chrI:613804-614093	TRUE	FALSE	FALSE	FALSE	FALSE	1	TRUE
chrI:614268-614635	TRUE	TRUE	TRUE	TRUE	TRUE	5	TRUE
chrI:614873-615222	FALSE	TRUE	TRUE	TRUE	FALSE	3	TRUE
chrI:615383-615755	TRUE	FALSE	TRUE	FALSE	FALSE	2	TRUE
chrI:616125-616464	TRUE	FALSE	TRUE	TRUE	TRUE	4	TRUE
chrI:616693-617093	FALSE	FALSE	TRUE	TRUE	FALSE	2	TRUE
chrI:617341-617834	TRUE	FALSE	TRUE	TRUE	FALSE	3	TRUE
chrI:617944-618473	FALSE	FALSE	FALSE	TRUE	FALSE	1	FALSE
chrI:618809-619070	FALSE	FALSE	FALSE	TRUE	FALSE	1	FALSE
chrI:619750-620002	FALSE	FALSE	FALSE	TRUE	FALSE	1	FALSE
chrI:620727-621166	FALSE	FALSE	FALSE	TRUE	FALSE	1	FALSE
chrI:622436-623046	TRUE	FALSE	TRUE	TRUE	FALSE	3	TRUE
chrI:623147-623766	TRUE	TRUE	TRUE	TRUE	FALSE	4	TRUE
chrI:624181-624520	FALSE	TRUE	TRUE	TRUE	TRUE	4	TRUE
chrI:624693-625021	TRUE	TRUE	TRUE	TRUE	TRUE	5	TRUE
chrI:625237-625607	FALSE	TRUE	TRUE	TRUE	TRUE	4	FALSE
chrI:625858-626794	TRUE	TRUE	TRUE	TRUE	TRUE	5	TRUE
chrI:627140-627368	FALSE	TRUE	FALSE	TRUE	FALSE	2	FALSE
chrI:627530-628124	TRUE	TRUE	TRUE	TRUE	TRUE	5	TRUE
chrI:628980-629469	TRUE	TRUE	TRUE	TRUE	TRUE	5	TRUE
chrI:629538-630529	TRUE	TRUE	TRUE	TRUE	TRUE	5	TRUE
chrI:630656-631179	TRUE	FALSE	TRUE	TRUE	FALSE	3	TRUE
chrI:631312-631588	TRUE	FALSE	FALSE	FALSE	FALSE	1	TRUE
chrI:632968-633999	TRUE	FALSE	TRUE	TRUE	FALSE	3	TRUE
chrI:634265-634768	FALSE	FALSE	FALSE	TRUE	FALSE	1	FALSE
chrI:635168-635698	TRUE	FALSE	FALSE	TRUE	FALSE	2	TRUE
chrI:636080-636423	FALSE	FALSE	FALSE	TRUE	FALSE	1	FALSE
chrI:636639-637069	TRUE	FALSE	TRUE	FALSE	TRUE	3	FALSE
chrI:637782-638133	TRUE	FALSE	TRUE	TRUE	TRUE	4	FALSE
chrI:638330-638667	FALSE	TRUE	TRUE	TRUE	FALSE	3	FALSE
chrI:638923-639248	TRUE	TRUE	TRUE	TRUE	FALSE	4	TRUE
chrI:639512-640177	TRUE	TRUE	TRUE	TRUE	TRUE	5	TRUE
chrI:640498-640750	FALSE	FALSE	TRUE	TRUE	FALSE	2	TRUE
chrI:640929-641346	TRUE	FALSE	TRUE	TRUE	TRUE	4	TRUE
chrI:641916-642344	FALSE	FALSE	TRUE	FALSE	FALSE	1	FALSE
chrI:642377-642811	TRUE	FALSE	TRUE	TRUE	FALSE	3	TRUE
chrI:643399-643766	TRUE	TRUE	TRUE	TRUE	FALSE	4	TRUE
chrI:644047-644768	TRUE	FALSE	TRUE	TRUE	FALSE	3	TRUE
chrI:645042-645421	TRUE	FALSE	TRUE	FALSE	FALSE	2	TRUE
chrI:646143-646775	FALSE	TRUE	TRUE	TRUE	TRUE	4	TRUE
chrI:647297-647654	FALSE	TRUE	TRUE	TRUE	TRUE	4	TRUE
chrI:648370-648792	TRUE	TRUE	TRUE	TRUE	TRUE	5	TRUE
chrI:649112-649637	TRUE	TRUE	TRUE	TRUE	TRUE	5	TRUE
chrI:649865-650293	TRUE	TRUE	TRUE	TRUE	TRUE	5	TRUE
chrI:650530-650959	FALSE	TRUE	TRUE	TRUE	TRUE	4	TRUE
chrI:651150-651788	TRUE	TRUE	TRUE	TRUE	TRUE	5	TRUE
chrI:652290-652529	FALSE	FALSE	TRUE	FALSE	FALSE	1	TRUE
chrI:652719-653281	TRUE	FALSE	TRUE	FALSE	TRUE	3	TRUE
chrI:653402-653739	TRUE	TRUE	TRUE	TRUE	FALSE	4	TRUE
chrI:653909-654222	TRUE	FALSE	TRUE	FALSE	FALSE	2	TRUE
chrI:655079-655568	TRUE	FALSE	TRUE	TRUE	FALSE	3	TRUE
chrI:655783-656313	TRUE	FALSE	TRUE	FALSE	FALSE	2	TRUE
chrI:657889-658142	FALSE	FALSE	TRUE	FALSE	FALSE	1	TRUE
chrI:658792-659289	TRUE	FALSE	FALSE	FALSE	FALSE	1	TRUE
chrI:659631-660145	TRUE	FALSE	TRUE	TRUE	TRUE	4	TRUE
chrI:662119-662646	TRUE	FALSE	TRUE	TRUE	TRUE	4	TRUE
chrI:663407-663805	TRUE	TRUE	TRUE	TRUE	TRUE	5	FALSE
chrI:663898-664401	TRUE	FALSE	TRUE	FALSE	FALSE	2	TRUE
chrI:665370-665774	TRUE	FALSE	TRUE	TRUE	TRUE	4	TRUE
chrI:666249-666649	FALSE	FALSE	TRUE	TRUE	TRUE	3	TRUE
chrI:667163-667511	FALSE	FALSE	TRUE	FALSE	FALSE	1	TRUE
chrI:667830-668149	FALSE	FALSE	TRUE	FALSE	FALSE	1	FALSE
chrI:668975-669226	FALSE	FALSE	TRUE	FALSE	TRUE	2	TRUE
chrI:672190-673006	FALSE	FALSE	TRUE	TRUE	FALSE	2	FALSE
chrI:673720-674004	FALSE	FALSE	TRUE	FALSE	FALSE	1	TRUE
chrI:674348-674806	FALSE	FALSE	TRUE	FALSE	FALSE	1	FALSE
chrI:676426-676750	TRUE	FALSE	FALSE	FALSE	FALSE	1	FALSE
chrI:676995-677348	FALSE	FALSE	TRUE	TRUE	FALSE	2	TRUE
chrI:677570-677892	TRUE	FALSE	TRUE	TRUE	TRUE	4	TRUE
chrI:678142-678496	FALSE	FALSE	TRUE	TRUE	FALSE	2	TRUE
chrI:678810-679196	TRUE	FALSE	FALSE	TRUE	FALSE	2	FALSE
chrI:680519-681114	FALSE	TRUE	TRUE	TRUE	TRUE	4	TRUE
chrI:681762-682106	FALSE	FALSE	TRUE	TRUE	FALSE	2	TRUE
chrI:682466-682682	FALSE	FALSE	TRUE	FALSE	FALSE	1	TRUE
chrI:682956-683322	FALSE	FALSE	TRUE	FALSE	FALSE	1	FALSE
chrI:686823-687486	FALSE	FALSE	TRUE	TRUE	FALSE	2	TRUE
chrI:689448-690018	TRUE	TRUE	TRUE	TRUE	TRUE	5	TRUE
chrI:691296-692005	TRUE	TRUE	TRUE	TRUE	TRUE	5	TRUE
chrI:692243-692648	TRUE	TRUE	TRUE	TRUE	TRUE	5	FALSE
chrI:692820-693455	FALSE	TRUE	TRUE	TRUE	TRUE	4	FALSE
chrI:693932-694446	TRUE	TRUE	TRUE	TRUE	TRUE	5	TRUE
chrI:694570-695014	TRUE	TRUE	TRUE	TRUE	TRUE	5	TRUE
chrI:695163-695380	FALSE	TRUE	FALSE	TRUE	FALSE	2	FALSE
chrI:695397-695750	TRUE	FALSE	TRUE	FALSE	TRUE	3	TRUE
chrI:695903-696711	TRUE	TRUE	TRUE	TRUE	TRUE	5	TRUE
chrI:696802-697301	TRUE	TRUE	TRUE	TRUE	TRUE	5	TRUE
chrI:697597-698302	TRUE	TRUE	TRUE	TRUE	TRUE	5	TRUE
chrI:698560-698923	TRUE	TRUE	TRUE	TRUE	TRUE	5	TRUE
chrI:699105-699327	FALSE	TRUE	TRUE	TRUE	TRUE	4	TRUE
chrI:699469-699791	FALSE	TRUE	TRUE	TRUE	TRUE	4	TRUE
chrI:700369-700721	FALSE	TRUE	TRUE	TRUE	TRUE	4	TRUE
chrI:700958-701339	FALSE	FALSE	TRUE	TRUE	TRUE	3	FALSE
chrI:701744-702234	FALSE	TRUE	TRUE	TRUE	TRUE	4	TRUE
chrI:703251-703488	FALSE	FALSE	FALSE	TRUE	FALSE	1	FALSE
chrI:704087-704426	TRUE	FALSE	TRUE	FALSE	FALSE	2	TRUE
chrI:704635-704962	FALSE	FALSE	TRUE	FALSE	FALSE	1	TRUE
chrI:706805-707343	TRUE	FALSE	TRUE	FALSE	FALSE	2	TRUE
chrI:710443-710750	TRUE	FALSE	FALSE	FALSE	FALSE	1	TRUE
chrI:711046-711654	TRUE	TRUE	TRUE	TRUE	TRUE	5	TRUE
chrI:713271-713596	FALSE	FALSE	FALSE	TRUE	FALSE	1	FALSE
chrI:713675-714243	TRUE	FALSE	TRUE	FALSE	TRUE	3	TRUE
chrI:714476-715083	FALSE	TRUE	TRUE	TRUE	TRUE	4	TRUE
chrI:715416-715834	FALSE	FALSE	FALSE	TRUE	FALSE	1	FALSE
chrI:715901-716391	TRUE	FALSE	TRUE	FALSE	FALSE	2	TRUE
chrI:716629-717109	TRUE	TRUE	TRUE	TRUE	TRUE	5	TRUE
chrI:717197-717872	TRUE	TRUE	TRUE	TRUE	TRUE	5	TRUE
chrI:718326-718716	FALSE	TRUE	TRUE	TRUE	TRUE	4	TRUE
chrI:719739-720193	TRUE	TRUE	TRUE	TRUE	TRUE	5	TRUE
chrI:721033-721644	TRUE	TRUE	TRUE	TRUE	TRUE	5	TRUE
chrI:721659-722005	FALSE	FALSE	TRUE	TRUE	TRUE	3	TRUE
chrI:722652-723490	FALSE	FALSE	FALSE	TRUE	FALSE	1	TRUE
chrI:724564-725237	TRUE	FALSE	TRUE	TRUE	TRUE	4	TRUE
chrI:725701-726236	FALSE	FALSE	TRUE	TRUE	TRUE	3	TRUE
chrI:726666-727016	FALSE	FALSE	TRUE	FALSE	FALSE	1	FALSE
chrI:730159-730554	FALSE	FALSE	TRUE	TRUE	FALSE	2	TRUE
chrI:731154-731481	FALSE	TRUE	TRUE	TRUE	TRUE	4	FALSE
chrI:731672-731930	FALSE	FALSE	TRUE	FALSE	FALSE	1	TRUE
chrI:732633-732983	FALSE	FALSE	TRUE	FALSE	FALSE	1	TRUE
chrI:734999-735338	FALSE	FALSE	TRUE	FALSE	FALSE	1	FALSE
chrI:735982-736324	FALSE	FALSE	TRUE	FALSE	FALSE	1	TRUE
chrI:736754-737033	FALSE	TRUE	TRUE	FALSE	FALSE	2	TRUE
chrI:737227-737583	FALSE	TRUE	TRUE	TRUE	TRUE	4	TRUE
chrI:737849-738152	FALSE	TRUE	TRUE	TRUE	TRUE	4	TRUE
chrI:738398-738703	TRUE	FALSE	TRUE	TRUE	TRUE	4	TRUE
chrI:739840-740152	FALSE	FALSE	TRUE	FALSE	FALSE	1	TRUE
chrI:740955-741300	FALSE	FALSE	TRUE	FALSE	FALSE	1	TRUE
chrI:744792-745192	TRUE	FALSE	TRUE	FALSE	FALSE	2	TRUE
chrI:749246-749873	FALSE	TRUE	TRUE	FALSE	TRUE	3	TRUE
chrI:753395-753772	FALSE	TRUE	TRUE	FALSE	FALSE	2	TRUE
chrI:754043-754533	TRUE	FALSE	TRUE	TRUE	TRUE	4	TRUE
chrI:754564-754876	FALSE	TRUE	TRUE	TRUE	TRUE	4	FALSE
chrI:756124-756507	FALSE	FALSE	TRUE	FALSE	FALSE	1	TRUE
chrI:759060-759478	TRUE	FALSE	FALSE	FALSE	FALSE	1	TRUE
chrI:759960-760343	FALSE	FALSE	TRUE	TRUE	TRUE	3	TRUE
chrI:761568-761989	FALSE	TRUE	TRUE	FALSE	TRUE	3	FALSE
chrI:762288-763354	FALSE	TRUE	TRUE	TRUE	FALSE	3	TRUE
chrI:763862-764191	TRUE	FALSE	TRUE	FALSE	FALSE	2	TRUE
chrI:764322-765077	TRUE	FALSE	TRUE	FALSE	FALSE	2	TRUE
chrI:766202-766531	FALSE	FALSE	TRUE	FALSE	FALSE	1	FALSE
chrI:766911-767324	FALSE	FALSE	TRUE	FALSE	TRUE	2	TRUE
chrI:767762-768169	FALSE	TRUE	TRUE	TRUE	FALSE	3	TRUE
chrI:769088-769732	FALSE	TRUE	TRUE	TRUE	TRUE	4	FALSE
chrI:769863-770265	FALSE	TRUE	TRUE	TRUE	TRUE	4	FALSE
chrI:772875-773185	FALSE	FALSE	TRUE	FALSE	FALSE	1	TRUE
chrI:776666-777130	FALSE	TRUE	TRUE	TRUE	TRUE	4	FALSE
chrI:777531-777777	FALSE	FALSE	TRUE	FALSE	FALSE	1	TRUE
chrI:778033-778416	TRUE	FALSE	TRUE	TRUE	TRUE	4	TRUE
chrI:780496-781163	TRUE	TRUE	TRUE	TRUE	TRUE	5	TRUE
chrI:781546-781907	TRUE	FALSE	TRUE	FALSE	TRUE	3	TRUE
chrI:782250-782564	FALSE	FALSE	TRUE	FALSE	FALSE	1	TRUE
chrI:782981-783272	FALSE	FALSE	TRUE	FALSE	FALSE	1	TRUE
chrI:783367-783699	FALSE	FALSE	TRUE	FALSE	FALSE	1	TRUE
chrI:784493-784810	TRUE	FALSE	TRUE	FALSE	TRUE	3	TRUE
chrI:785548-786181	FALSE	FALSE	TRUE	TRUE	FALSE	2	FALSE
chrI:786357-786704	FALSE	FALSE	TRUE	TRUE	FALSE	2	FALSE
chrI:787812-788171	FALSE	FALSE	TRUE	FALSE	FALSE	1	FALSE
chrI:788550-788906	FALSE	FALSE	TRUE	TRUE	TRUE	3	TRUE
chrI:789166-789437	FALSE	FALSE	TRUE	FALSE	FALSE	1	FALSE
chrI:790671-791057	FALSE	FALSE	TRUE	FALSE	FALSE	1	FALSE
chrI:792652-792902	FALSE	FALSE	TRUE	FALSE	FALSE	1	TRUE
chrI:793193-793542	TRUE	FALSE	TRUE	FALSE	FALSE	2	TRUE
chrI:796127-796427	FALSE	FALSE	TRUE	FALSE	FALSE	1	TRUE
chrI:798183-798495	FALSE	FALSE	TRUE	FALSE	FALSE	1	FALSE
chrI:799194-799814	TRUE	TRUE	TRUE	TRUE	FALSE	4	TRUE
chrI:801044-801411	FALSE	FALSE	TRUE	FALSE	FALSE	1	TRUE
chrI:803788-804197	FALSE	FALSE	TRUE	TRUE	TRUE	3	TRUE
chrI:807038-807604	FALSE	TRUE	TRUE	TRUE	TRUE	4	FALSE
chrI:809662-810326	FALSE	FALSE	TRUE	FALSE	FALSE	1	TRUE
chrI:813873-814221	FALSE	FALSE	TRUE	FALSE	FALSE	1	FALSE
chrI:817899-818564	FALSE	TRUE	FALSE	FALSE	FALSE	1	TRUE
chrI:821093-821427	TRUE	FALSE	TRUE	FALSE	FALSE	2	TRUE
chrI:821781-822195	TRUE	FALSE	TRUE	FALSE	FALSE	2	TRUE
chrI:823226-823522	FALSE	FALSE	TRUE	FALSE	FALSE	1	TRUE
chrI:823824-824467	FALSE	FALSE	TRUE	FALSE	FALSE	1	TRUE
chrI:825136-825770	TRUE	TRUE	TRUE	TRUE	TRUE	5	TRUE
chrI:826194-826500	FALSE	TRUE	FALSE	FALSE	TRUE	2	FALSE
chrI:830454-830847	TRUE	FALSE	TRUE	TRUE	FALSE	3	TRUE
chrI:833410-833873	TRUE	FALSE	FALSE	FALSE	TRUE	2	TRUE
chrI:834189-834334	TRUE	FALSE	FALSE	FALSE	FALSE	1	TRUE
chrI:835208-835620	TRUE	FALSE	TRUE	TRUE	TRUE	4	TRUE
chrI:836572-836933	TRUE	FALSE	TRUE	FALSE	TRUE	3	TRUE
chrI:837041-837411	TRUE	FALSE	TRUE	TRUE	FALSE	3	TRUE
chrI:843169-843678	FALSE	TRUE	TRUE	TRUE	TRUE	4	TRUE
chrI:844318-844940	FALSE	FALSE	TRUE	TRUE	TRUE	3	TRUE
chrI:845269-845634	FALSE	FALSE	TRUE	FALSE	FALSE	1	TRUE
chrI:846122-846401	TRUE	FALSE	FALSE	FALSE	TRUE	2	FALSE
chrI:846897-847235	FALSE	FALSE	TRUE	FALSE	FALSE	1	TRUE
chrI:847846-848292	TRUE	FALSE	TRUE	FALSE	FALSE	2	TRUE
chrI:848586-849147	TRUE	TRUE	TRUE	TRUE	TRUE	5	FALSE
chrI:849628-850030	TRUE	TRUE	TRUE	FALSE	FALSE	3	TRUE
chrI:850298-850596	TRUE	FALSE	TRUE	FALSE	FALSE	2	TRUE
chrI:850770-851031	FALSE	FALSE	TRUE	FALSE	FALSE	1	FALSE
chrI:851330-851699	TRUE	TRUE	TRUE	TRUE	FALSE	4	FALSE
chrI:851985-852361	FALSE	TRUE	TRUE	TRUE	TRUE	4	FALSE
chrI:852601-852916	FALSE	TRUE	TRUE	TRUE	TRUE	4	FALSE
chrI:853156-853505	TRUE	TRUE	TRUE	TRUE	TRUE	5	FALSE
chrI:860348-860728	FALSE	FALSE	TRUE	FALSE	FALSE	1	TRUE
chrI:861277-861696	FALSE	FALSE	TRUE	FALSE	FALSE	1	TRUE
chrI:862417-863036	TRUE	FALSE	TRUE	TRUE	FALSE	3	TRUE
chrI:865417-865653	TRUE	FALSE	FALSE	FALSE	FALSE	1	TRUE
chrI:866041-866493	TRUE	FALSE	TRUE	FALSE	FALSE	2	TRUE
chrI:868193-868521	TRUE	FALSE	FALSE	FALSE	FALSE	1	TRUE
chrI:871766-872873	TRUE	TRUE	TRUE	TRUE	TRUE	5	TRUE
chrI:872992-873632	TRUE	TRUE	TRUE	TRUE	TRUE	5	TRUE
chrI:873716-874285	TRUE	TRUE	TRUE	TRUE	FALSE	4	TRUE
chrI:874325-874709	FALSE	TRUE	TRUE	TRUE	TRUE	4	TRUE
chrI:875884-876183	FALSE	FALSE	TRUE	FALSE	FALSE	1	FALSE
chrI:876685-877198	FALSE	TRUE	TRUE	TRUE	TRUE	4	FALSE
chrI:877643-877921	FALSE	FALSE	FALSE	TRUE	FALSE	1	FALSE
chrI:878602-879438	FALSE	FALSE	TRUE	TRUE	FALSE	2	TRUE
chrI:880026-880416	FALSE	FALSE	TRUE	TRUE	FALSE	2	FALSE
chrI:881741-882199	FALSE	TRUE	TRUE	TRUE	FALSE	3	TRUE
chrI:882344-883205	FALSE	TRUE	FALSE	TRUE	TRUE	3	FALSE
chrI:883354-883909	TRUE	FALSE	TRUE	TRUE	TRUE	4	TRUE
chrI:883999-884285	TRUE	FALSE	FALSE	FALSE	FALSE	1	FALSE
chrI:884289-884704	FALSE	TRUE	FALSE	FALSE	FALSE	1	FALSE
chrI:885327-885581	FALSE	FALSE	FALSE	FALSE	TRUE	1	FALSE
chrI:886794-887071	FALSE	FALSE	TRUE	FALSE	FALSE	1	TRUE
chrI:887295-887772	FALSE	FALSE	TRUE	FALSE	FALSE	1	TRUE
chrI:888282-888586	TRUE	FALSE	FALSE	FALSE	FALSE	1	TRUE
chrI:888625-889159	TRUE	TRUE	TRUE	TRUE	TRUE	5	TRUE
chrI:889339-889807	TRUE	TRUE	TRUE	TRUE	TRUE	5	TRUE
chrI:890009-890307	FALSE	FALSE	TRUE	FALSE	FALSE	1	TRUE
chrI:890655-891422	TRUE	TRUE	TRUE	TRUE	TRUE	5	TRUE
chrI:891675-892190	TRUE	TRUE	TRUE	TRUE	TRUE	5	TRUE
chrI:894936-895284	TRUE	FALSE	TRUE	FALSE	FALSE	2	TRUE
chrI:895857-896385	TRUE	FALSE	FALSE	TRUE	FALSE	2	TRUE
chrI:901418-902112	TRUE	FALSE	TRUE	FALSE	TRUE	3	TRUE
chrI:902441-902777	FALSE	FALSE	TRUE	FALSE	FALSE	1	TRUE
chrI:903077-904575	TRUE	FALSE	TRUE	TRUE	FALSE	3	TRUE
chrI:904705-906003	TRUE	FALSE	TRUE	TRUE	TRUE	4	TRUE
chrI:906014-906366	TRUE	FALSE	FALSE	FALSE	FALSE	1	FALSE
chrI:906433-906790	TRUE	FALSE	FALSE	FALSE	FALSE	1	FALSE
chrI:906952-907284	TRUE	TRUE	TRUE	TRUE	TRUE	5	TRUE
chrI:907508-907932	TRUE	TRUE	TRUE	TRUE	TRUE	5	TRUE
chrI:908090-908468	FALSE	TRUE	TRUE	TRUE	TRUE	4	TRUE
chrI:908779-909140	FALSE	TRUE	TRUE	TRUE	FALSE	3	TRUE
chrI:909403-909722	FALSE	FALSE	TRUE	TRUE	FALSE	2	TRUE
chrI:909831-910069	FALSE	FALSE	FALSE	FALSE	TRUE	1	FALSE
chrI:910270-910677	FALSE	FALSE	TRUE	TRUE	FALSE	2	TRUE
chrI:911929-912297	FALSE	FALSE	TRUE	TRUE	FALSE	2	TRUE
chrI:913113-913771	FALSE	FALSE	TRUE	TRUE	TRUE	3	TRUE
chrI:916699-917260	FALSE	FALSE	TRUE	FALSE	TRUE	2	TRUE
chrI:918253-918587	FALSE	FALSE	TRUE	FALSE	FALSE	1	TRUE
chrI:919986-920275	FALSE	FALSE	TRUE	FALSE	FALSE	1	TRUE
chrI:920576-920810	FALSE	FALSE	TRUE	FALSE	FALSE	1	TRUE
chrI:920976-921313	FALSE	FALSE	TRUE	FALSE	FALSE	1	TRUE
chrI:921713-922036	FALSE	FALSE	TRUE	TRUE	FALSE	2	TRUE
chrI:922177-922480	FALSE	FALSE	TRUE	TRUE	FALSE	2	TRUE
chrI:922977-923300	FALSE	FALSE	TRUE	FALSE	FALSE	1	TRUE
chrI:923376-923747	FALSE	FALSE	TRUE	TRUE	FALSE	2	TRUE
chrI:923947-924139	FALSE	FALSE	TRUE	FALSE	FALSE	1	TRUE
chrI:924308-924571	FALSE	FALSE	TRUE	FALSE	FALSE	1	TRUE
chrI:924782-925174	FALSE	FALSE	TRUE	TRUE	FALSE	2	TRUE
chrI:925766-926308	FALSE	FALSE	TRUE	TRUE	FALSE	2	TRUE
chrI:926816-927146	FALSE	FALSE	TRUE	TRUE	FALSE	2	FALSE
chrI:928746-929443	FALSE	FALSE	TRUE	FALSE	FALSE	1	TRUE
chrI:930005-930254	FALSE	FALSE	TRUE	FALSE	FALSE	1	TRUE
chrI:930462-930967	TRUE	FALSE	TRUE	FALSE	FALSE	2	TRUE
chrI:935296-935746	TRUE	FALSE	TRUE	FALSE	FALSE	2	FALSE
chrI:936104-936645	TRUE	FALSE	TRUE	TRUE	FALSE	3	FALSE
chrI:936955-937313	TRUE	FALSE	TRUE	FALSE	TRUE	3	TRUE
chrI:937576-938235	TRUE	FALSE	TRUE	FALSE	FALSE	2	TRUE
chrI:939554-939919	TRUE	TRUE	TRUE	TRUE	FALSE	4	FALSE
chrI:941760-942082	FALSE	FALSE	TRUE	FALSE	FALSE	1	TRUE
chrI:945989-946513	FALSE	TRUE	TRUE	TRUE	FALSE	3	FALSE
chrI:946711-947059	FALSE	FALSE	TRUE	TRUE	TRUE	3	TRUE
chrI:947709-947963	FALSE	FALSE	TRUE	FALSE	FALSE	1	TRUE
chrI:948190-948536	TRUE	FALSE	TRUE	TRUE	TRUE	4	TRUE
chrI:949546-949794	TRUE	FALSE	FALSE	FALSE	FALSE	1	TRUE
chrI:949806-950381	TRUE	TRUE	TRUE	TRUE	FALSE	4	TRUE
chrI:950524-950782	FALSE	FALSE	TRUE	FALSE	FALSE	1	FALSE
chrI:951900-952250	TRUE	FALSE	TRUE	FALSE	FALSE	2	TRUE
chrI:954190-954656	FALSE	TRUE	FALSE	FALSE	FALSE	1	FALSE
chrI:957189-957517	FALSE	TRUE	FALSE	FALSE	FALSE	1	FALSE
chrI:960515-960981	FALSE	TRUE	TRUE	TRUE	FALSE	3	TRUE
chrI:961283-961604	FALSE	TRUE	FALSE	FALSE	FALSE	1	FALSE
chrI:961981-962438	TRUE	FALSE	FALSE	FALSE	FALSE	1	TRUE
chrI:967148-967564	FALSE	FALSE	TRUE	TRUE	TRUE	3	TRUE
chrI:969863-970186	FALSE	FALSE	TRUE	TRUE	FALSE	2	TRUE
chrI:971851-972138	FALSE	FALSE	TRUE	FALSE	FALSE	1	FALSE
chrI:972330-972588	FALSE	FALSE	TRUE	FALSE	FALSE	1	TRUE
chrI:973003-973688	TRUE	TRUE	TRUE	TRUE	TRUE	5	FALSE
chrI:973791-974022	FALSE	TRUE	FALSE	TRUE	FALSE	2	FALSE
chrI:977701-978091	TRUE	FALSE	TRUE	TRUE	FALSE	3	TRUE
chrI:979802-980106	FALSE	FALSE	TRUE	FALSE	FALSE	1	TRUE
chrI:980859-981473	FALSE	FALSE	TRUE	FALSE	TRUE	2	TRUE
chrI:983492-984079	TRUE	FALSE	TRUE	TRUE	TRUE	4	TRUE
chrI:984357-984565	FALSE	FALSE	TRUE	FALSE	FALSE	1	FALSE
chrI:988878-989264	FALSE	TRUE	FALSE	FALSE	FALSE	1	FALSE
chrI:991265-991533	FALSE	FALSE	TRUE	FALSE	FALSE	1	FALSE
chrI:991824-992871	TRUE	FALSE	TRUE	TRUE	TRUE	4	TRUE
chrI:994495-994841	FALSE	FALSE	TRUE	FALSE	FALSE	1	TRUE
chrI:995271-995635	FALSE	FALSE	TRUE	FALSE	FALSE	1	FALSE
chrI:996110-996708	FALSE	FALSE	TRUE	FALSE	FALSE	1	FALSE
chrI:997194-997401	FALSE	FALSE	TRUE	FALSE	FALSE	1	TRUE
chrI:997538-997858	FALSE	FALSE	TRUE	FALSE	FALSE	1	FALSE
chrI:998496-998899	FALSE	FALSE	TRUE	FALSE	FALSE	1	TRUE
chrI:999139-999609	FALSE	TRUE	FALSE	FALSE	FALSE	1	FALSE
chrI:1001295-1001600	FALSE	FALSE	TRUE	FALSE	FALSE	1	TRUE
chrI:1001994-1002280	FALSE	FALSE	TRUE	FALSE	TRUE	2	TRUE
chrI:1003038-1003344	FALSE	FALSE	TRUE	FALSE	FALSE	1	TRUE
chrI:1004147-1004693	FALSE	FALSE	TRUE	FALSE	FALSE	1	TRUE
chrI:1006257-1006936	FALSE	FALSE	TRUE	FALSE	TRUE	2	TRUE
chrI:1007583-1007984	FALSE	FALSE	TRUE	TRUE	TRUE	3	TRUE
chrI:1008474-1008770	FALSE	FALSE	TRUE	FALSE	FALSE	1	TRUE
chrI:1008854-1009232	FALSE	FALSE	TRUE	FALSE	TRUE	2	TRUE
chrI:1009639-1010053	FALSE	FALSE	TRUE	TRUE	FALSE	2	TRUE
chrI:1010295-1010486	FALSE	FALSE	TRUE	FALSE	FALSE	1	FALSE
chrI:1010769-1011392	FALSE	TRUE	TRUE	TRUE	TRUE	4	TRUE
chrI:1011908-1012236	FALSE	FALSE	TRUE	TRUE	TRUE	3	TRUE
chrI:1012583-1012893	FALSE	FALSE	TRUE	FALSE	FALSE	1	TRUE
chrI:1014358-1014625	TRUE	FALSE	FALSE	FALSE	FALSE	1	FALSE
chrI:1014687-1015088	FALSE	TRUE	TRUE	TRUE	TRUE	4	TRUE
chrI:1015328-1015663	TRUE	TRUE	TRUE	TRUE	TRUE	5	TRUE
chrI:1015920-1016172	FALSE	FALSE	TRUE	TRUE	TRUE	3	TRUE
chrI:1016449-1016934	TRUE	TRUE	TRUE	TRUE	TRUE	5	TRUE
chrI:1017200-1017575	TRUE	TRUE	TRUE	TRUE	TRUE	5	TRUE
chrI:1017786-1017994	FALSE	FALSE	TRUE	TRUE	FALSE	2	TRUE
chrI:1018175-1018507	TRUE	FALSE	TRUE	TRUE	FALSE	3	TRUE
chrI:1018654-1019084	FALSE	FALSE	TRUE	TRUE	TRUE	3	FALSE
chrI:1019233-1019777	TRUE	TRUE	TRUE	TRUE	TRUE	5	TRUE
chrI:1019934-1020350	FALSE	FALSE	TRUE	TRUE	TRUE	3	TRUE
chrI:1020637-1020975	FALSE	FALSE	TRUE	TRUE	FALSE	2	TRUE
chrI:1021997-1022422	FALSE	FALSE	FALSE	TRUE	FALSE	1	TRUE
chrI:1024339-1024646	FALSE	FALSE	TRUE	FALSE	FALSE	1	TRUE
chrI:1024994-1026256	TRUE	FALSE	TRUE	TRUE	FALSE	3	TRUE
chrI:1030024-1030405	FALSE	FALSE	TRUE	FALSE	FALSE	1	FALSE
chrI:1030804-1032089	TRUE	FALSE	TRUE	TRUE	TRUE	4	TRUE
chrI:1033456-1033734	TRUE	FALSE	FALSE	FALSE	FALSE	1	TRUE
chrI:1033807-1034138	TRUE	FALSE	TRUE	FALSE	FALSE	2	TRUE
chrI:1034206-1034579	FALSE	TRUE	TRUE	TRUE	TRUE	4	FALSE
chrI:1037870-1038145	TRUE	FALSE	FALSE	FALSE	FALSE	1	TRUE
chrI:1038220-1039078	TRUE	FALSE	TRUE	FALSE	FALSE	2	TRUE
chrI:1040933-1041319	TRUE	FALSE	TRUE	TRUE	TRUE	4	TRUE
chrI:1041463-1042245	TRUE	FALSE	FALSE	TRUE	FALSE	2	TRUE
chrI:1042520-1042960	FALSE	FALSE	TRUE	TRUE	FALSE	2	TRUE
chrI:1045384-1045971	TRUE	FALSE	TRUE	FALSE	TRUE	3	TRUE
chrI:1046309-1046745	FALSE	TRUE	TRUE	FALSE	FALSE	2	TRUE
chrI:1047505-1047816	FALSE	FALSE	TRUE	FALSE	FALSE	1	TRUE
chrI:1048239-1048625	TRUE	FALSE	FALSE	FALSE	FALSE	1	TRUE
chrI:1048737-1049291	TRUE	TRUE	TRUE	TRUE	TRUE	5	TRUE
chrI:1049634-1050284	TRUE	TRUE	TRUE	TRUE	TRUE	5	TRUE
chrI:1050648-1051059	TRUE	TRUE	TRUE	TRUE	TRUE	5	TRUE
chrI:1051227-1052128	TRUE	TRUE	TRUE	TRUE	TRUE	5	TRUE
chrI:1052374-1052856	TRUE	TRUE	TRUE	TRUE	TRUE	5	TRUE
chrI:1053031-1053453	TRUE	TRUE	TRUE	FALSE	TRUE	4	TRUE
chrI:1053459-1054113	FALSE	TRUE	TRUE	TRUE	TRUE	4	TRUE
chrI:1054428-1054882	TRUE	TRUE	TRUE	TRUE	FALSE	4	TRUE
chrI:1055279-1055868	TRUE	FALSE	FALSE	FALSE	FALSE	1	FALSE
chrI:1056486-1056932	FALSE	FALSE	TRUE	TRUE	TRUE	3	TRUE
chrI:1058040-1059008	TRUE	FALSE	TRUE	TRUE	TRUE	4	TRUE
chrI:1059638-1059862	TRUE	TRUE	TRUE	TRUE	TRUE	5	TRUE
chrI:1060134-1060528	TRUE	TRUE	TRUE	TRUE	TRUE	5	FALSE
chrI:1060989-1061386	TRUE	FALSE	FALSE	TRUE	FALSE	2	TRUE
chrI:1061425-1061823	TRUE	TRUE	TRUE	TRUE	FALSE	4	TRUE
chrI:1062021-1062353	TRUE	TRUE	TRUE	TRUE	TRUE	5	FALSE
chrI:1062611-1062993	TRUE	TRUE	TRUE	TRUE	TRUE	5	TRUE
chrI:1063165-1063528	TRUE	FALSE	TRUE	TRUE	FALSE	3	TRUE
chrI:1063625-1064007	FALSE	FALSE	FALSE	TRUE	FALSE	1	TRUE
chrI:1064340-1064600	TRUE	FALSE	FALSE	FALSE	FALSE	1	TRUE
chrI:1064733-1065231	TRUE	TRUE	TRUE	TRUE	TRUE	5	TRUE
chrI:1065376-1065752	TRUE	TRUE	TRUE	TRUE	TRUE	5	TRUE
chrI:1066962-1067304	TRUE	TRUE	TRUE	TRUE	TRUE	5	FALSE
chrI:1067729-1068151	TRUE	TRUE	TRUE	TRUE	TRUE	5	TRUE
chrI:1068273-1069250	TRUE	TRUE	TRUE	FALSE	TRUE	4	FALSE
chrI:1069401-1070132	TRUE	TRUE	TRUE	TRUE	TRUE	5	FALSE
chrI:1070942-1071270	FALSE	FALSE	TRUE	FALSE	FALSE	1	TRUE
chrI:1072095-1072518	FALSE	FALSE	TRUE	TRUE	FALSE	2	TRUE
chrI:1073433-1074256	TRUE	TRUE	TRUE	TRUE	TRUE	5	TRUE
chrI:1074977-1075626	TRUE	TRUE	TRUE	TRUE	TRUE	5	FALSE
chrI:1076402-1076849	TRUE	TRUE	TRUE	TRUE	TRUE	5	TRUE
chrI:1077090-1077462	TRUE	FALSE	TRUE	FALSE	FALSE	2	FALSE
chrI:1077953-1078290	FALSE	FALSE	FALSE	TRUE	FALSE	1	FALSE
chrI:1079459-1079817	FALSE	FALSE	TRUE	TRUE	FALSE	2	FALSE
chrI:1080216-1080732	TRUE	FALSE	FALSE	TRUE	FALSE	2	FALSE
chrI:1080747-1081028	FALSE	FALSE	FALSE	TRUE	FALSE	1	TRUE
chrI:1081053-1081484	TRUE	FALSE	FALSE	TRUE	FALSE	2	TRUE
chrI:1081788-1082069	FALSE	FALSE	FALSE	TRUE	FALSE	1	FALSE
chrI:1082075-1082733	TRUE	FALSE	TRUE	TRUE	TRUE	4	TRUE
chrI:1085613-1085854	FALSE	FALSE	TRUE	FALSE	FALSE	1	TRUE
chrI:1086180-1086533	FALSE	FALSE	TRUE	TRUE	TRUE	3	TRUE
chrI:1086911-1087297	FALSE	FALSE	TRUE	TRUE	TRUE	3	TRUE
chrI:1088519-1088845	FALSE	FALSE	TRUE	TRUE	FALSE	2	TRUE
chrI:1089167-1089592	TRUE	FALSE	TRUE	TRUE	TRUE	4	TRUE
chrI:1089831-1090085	FALSE	FALSE	TRUE	FALSE	FALSE	1	FALSE
chrI:1090315-1090588	FALSE	FALSE	TRUE	FALSE	FALSE	1	TRUE
chrI:1091078-1091361	FALSE	FALSE	TRUE	FALSE	FALSE	1	FALSE
chrI:1091902-1092235	FALSE	FALSE	TRUE	FALSE	FALSE	1	FALSE
chrI:1095121-1095453	FALSE	FALSE	TRUE	FALSE	FALSE	1	TRUE
chrI:1096075-1096647	TRUE	TRUE	TRUE	TRUE	FALSE	4	TRUE
chrI:1096970-1097130	FALSE	FALSE	TRUE	FALSE	FALSE	1	FALSE
chrI:1097780-1098300	FALSE	FALSE	TRUE	TRUE	FALSE	2	FALSE
chrI:1099226-1099764	TRUE	TRUE	TRUE	TRUE	FALSE	4	TRUE
chrI:1099866-1100493	TRUE	FALSE	TRUE	TRUE	TRUE	4	TRUE
chrI:1101167-1101511	TRUE	FALSE	TRUE	FALSE	FALSE	2	TRUE
chrI:1102342-1102569	FALSE	FALSE	TRUE	FALSE	FALSE	1	TRUE
chrI:1102820-1103127	FALSE	FALSE	TRUE	FALSE	FALSE	1	TRUE
chrI:1103717-1104056	FALSE	FALSE	TRUE	FALSE	FALSE	1	TRUE
chrI:1104456-1104744	FALSE	FALSE	TRUE	FALSE	FALSE	1	TRUE
chrI:1105610-1105915	FALSE	FALSE	TRUE	FALSE	FALSE	1	TRUE
chrI:1106176-1106488	TRUE	TRUE	TRUE	FALSE	FALSE	3	FALSE
chrI:1107168-1107477	FALSE	FALSE	TRUE	FALSE	FALSE	1	FALSE
chrI:1108023-1108445	FALSE	FALSE	TRUE	FALSE	FALSE	1	FALSE
chrI:1109183-1109686	FALSE	FALSE	TRUE	FALSE	FALSE	1	TRUE
chrI:1110187-1110529	FALSE	FALSE	FALSE	FALSE	TRUE	1	TRUE
chrI:1114341-1114640	FALSE	FALSE	TRUE	FALSE	FALSE	1	TRUE
chrI:1116286-1116504	FALSE	FALSE	TRUE	TRUE	FALSE	2	TRUE
chrI:1116857-1117184	FALSE	TRUE	TRUE	TRUE	TRUE	4	TRUE
chrI:1117399-1117558	FALSE	TRUE	TRUE	TRUE	TRUE	4	TRUE
chrI:1124546-1124835	TRUE	FALSE	FALSE	FALSE	TRUE	2	TRUE
chrI:1127187-1127680	FALSE	FALSE	TRUE	FALSE	FALSE	1	TRUE
chrI:1128091-1128429	FALSE	FALSE	TRUE	FALSE	FALSE	1	TRUE
chrI:1128830-1129199	FALSE	FALSE	TRUE	FALSE	FALSE	1	TRUE
chrI:1131860-1132169	FALSE	FALSE	TRUE	FALSE	FALSE	1	FALSE
chrI:1132460-1132714	TRUE	FALSE	TRUE	FALSE	FALSE	2	TRUE
chrI:1132897-1133221	FALSE	FALSE	TRUE	FALSE	FALSE	1	TRUE
chrI:1133609-1133995	FALSE	FALSE	TRUE	TRUE	TRUE	3	FALSE
chrI:1136033-1136405	TRUE	FALSE	TRUE	TRUE	TRUE	4	TRUE
chrI:1136896-1137548	TRUE	FALSE	TRUE	TRUE	FALSE	3	TRUE
chrI:1138440-1139143	TRUE	FALSE	TRUE	TRUE	FALSE	3	TRUE
chrI:1139832-1140290	TRUE	TRUE	TRUE	TRUE	TRUE	5	FALSE
chrI:1140656-1141108	FALSE	FALSE	FALSE	TRUE	FALSE	1	TRUE
chrI:1142022-1142311	FALSE	FALSE	FALSE	TRUE	FALSE	1	FALSE
chrI:1142561-1142901	FALSE	FALSE	TRUE	TRUE	TRUE	3	TRUE
chrI:1143302-1143645	FALSE	FALSE	FALSE	TRUE	FALSE	1	TRUE
chrI:1144496-1144893	FALSE	FALSE	FALSE	TRUE	FALSE	1	TRUE
chrI:1144954-1145233	TRUE	FALSE	FALSE	FALSE	FALSE	1	TRUE
chrI:1145557-1145858	FALSE	FALSE	FALSE	TRUE	FALSE	1	TRUE
chrI:1146055-1146338	TRUE	FALSE	FALSE	FALSE	FALSE	1	TRUE
chrI:1146535-1146946	FALSE	FALSE	TRUE	TRUE	FALSE	2	TRUE
chrI:1147276-1147765	TRUE	FALSE	FALSE	TRUE	FALSE	2	TRUE
chrI:1151171-1152188	TRUE	FALSE	TRUE	TRUE	TRUE	4	TRUE
chrI:1152269-1152557	TRUE	FALSE	FALSE	FALSE	FALSE	1	FALSE
chrI:1153082-1153568	TRUE	FALSE	TRUE	FALSE	FALSE	2	TRUE
chrI:1153993-1154363	FALSE	FALSE	TRUE	TRUE	TRUE	3	TRUE
chrI:1154547-1155509	TRUE	FALSE	TRUE	TRUE	TRUE	4	TRUE
chrI:1155999-1156340	TRUE	TRUE	TRUE	FALSE	FALSE	3	FALSE
chrI:1156550-1156853	FALSE	FALSE	FALSE	TRUE	FALSE	1	FALSE
chrI:1156998-1157846	TRUE	FALSE	FALSE	TRUE	TRUE	3	FALSE
chrI:1157989-1158697	TRUE	FALSE	TRUE	TRUE	TRUE	4	TRUE
chrI:1158778-1159068	TRUE	FALSE	FALSE	FALSE	FALSE	1	TRUE
chrI:1159071-1159481	FALSE	FALSE	TRUE	TRUE	TRUE	3	FALSE
chrI:1159661-1160411	TRUE	FALSE	FALSE	TRUE	TRUE	3	TRUE
chrI:1160791-1161358	TRUE	FALSE	TRUE	TRUE	TRUE	4	TRUE
chrI:1161593-1162046	TRUE	FALSE	TRUE	TRUE	TRUE	4	TRUE
chrI:1162308-1162801	FALSE	FALSE	TRUE	TRUE	FALSE	2	TRUE
chrI:1163092-1164037	TRUE	FALSE	TRUE	TRUE	FALSE	3	TRUE
chrI:1165435-1165803	TRUE	FALSE	TRUE	TRUE	FALSE	3	TRUE
chrI:1165906-1166135	FALSE	FALSE	TRUE	FALSE	FALSE	1	TRUE
chrI:1166352-1166675	FALSE	FALSE	FALSE	TRUE	FALSE	1	TRUE
chrI:1166824-1167341	TRUE	FALSE	FALSE	FALSE	FALSE	1	FALSE
chrI:1167484-1168591	TRUE	FALSE	TRUE	TRUE	TRUE	4	TRUE
chrI:1168754-1169000	TRUE	FALSE	FALSE	FALSE	FALSE	1	TRUE
chrI:1169747-1170267	FALSE	FALSE	TRUE	TRUE	FALSE	2	TRUE
chrI:1171013-1171532	FALSE	FALSE	TRUE	TRUE	TRUE	3	TRUE
chrI:1174478-1175142	TRUE	TRUE	TRUE	TRUE	TRUE	5	TRUE
chrI:1175707-1176072	TRUE	FALSE	TRUE	TRUE	FALSE	3	FALSE
chrI:1176785-1177465	TRUE	FALSE	TRUE	TRUE	FALSE	3	TRUE
chrI:1179522-1179983	TRUE	FALSE	TRUE	TRUE	TRUE	4	TRUE
chrI:1181458-1182122	TRUE	FALSE	TRUE	TRUE	FALSE	3	TRUE
chrI:1183833-1184292	FALSE	FALSE	TRUE	TRUE	FALSE	2	TRUE
chrI:1184524-1184832	FALSE	FALSE	TRUE	TRUE	TRUE	3	TRUE
chrI:1186168-1186473	TRUE	FALSE	FALSE	FALSE	FALSE	1	FALSE
chrI:1186589-1187253	FALSE	FALSE	FALSE	TRUE	FALSE	1	TRUE
chrI:1188088-1188671	FALSE	FALSE	FALSE	TRUE	FALSE	1	TRUE
chrI:1190180-1190466	TRUE	FALSE	FALSE	FALSE	FALSE	1	TRUE
chrI:1192669-1192882	TRUE	FALSE	FALSE	FALSE	FALSE	1	TRUE
chrI:1194195-1194999	TRUE	FALSE	TRUE	TRUE	FALSE	3	TRUE
chrI:1197642-1198214	TRUE	FALSE	TRUE	TRUE	FALSE	3	TRUE
chrI:1198292-1198745	TRUE	FALSE	TRUE	TRUE	FALSE	3	TRUE
chrI:1199293-1199702	TRUE	FALSE	TRUE	TRUE	TRUE	4	TRUE
chrI:1200375-1200954	TRUE	FALSE	FALSE	TRUE	FALSE	2	TRUE
chrI:1201175-1201452	TRUE	FALSE	FALSE	FALSE	FALSE	1	TRUE
chrI:1201480-1201778	FALSE	FALSE	FALSE	TRUE	FALSE	1	TRUE
chrI:1201919-1202387	FALSE	FALSE	FALSE	TRUE	FALSE	1	TRUE
chrI:1205173-1205424	TRUE	FALSE	FALSE	FALSE	FALSE	1	TRUE
chrI:1205641-1205925	TRUE	FALSE	FALSE	FALSE	FALSE	1	TRUE
chrI:1206432-1207426	TRUE	FALSE	TRUE	TRUE	FALSE	3	TRUE
chrI:1209216-1209637	FALSE	FALSE	TRUE	TRUE	FALSE	2	TRUE
chrI:1209889-1210710	TRUE	FALSE	TRUE	TRUE	FALSE	3	TRUE
chrI:1210978-1211362	TRUE	FALSE	TRUE	TRUE	TRUE	4	TRUE
chrI:1212933-1213902	FALSE	TRUE	TRUE	TRUE	TRUE	4	TRUE
chrI:1214003-1214326	FALSE	FALSE	TRUE	TRUE	TRUE	3	TRUE
chrI:1214586-1214901	TRUE	FALSE	TRUE	FALSE	FALSE	2	TRUE
chrI:1215029-1215343	FALSE	FALSE	FALSE	TRUE	FALSE	1	TRUE
chrI:1215546-1216179	TRUE	FALSE	FALSE	TRUE	FALSE	2	TRUE
chrI:1216407-1216706	TRUE	FALSE	FALSE	FALSE	FALSE	1	TRUE
chrI:1217225-1217629	TRUE	FALSE	FALSE	TRUE	FALSE	2	FALSE
chrI:1217804-1218220	TRUE	FALSE	TRUE	TRUE	FALSE	3	TRUE
chrI:1218527-1218954	FALSE	FALSE	TRUE	TRUE	TRUE	3	TRUE
chrI:1219375-1219719	TRUE	FALSE	TRUE	TRUE	TRUE	4	TRUE
chrI:1220987-1221296	FALSE	FALSE	FALSE	TRUE	FALSE	1	FALSE
chrI:1221329-1221621	FALSE	FALSE	TRUE	FALSE	FALSE	1	TRUE
chrI:1221922-1222301	TRUE	FALSE	TRUE	TRUE	TRUE	4	TRUE
chrI:1222445-1222776	TRUE	TRUE	TRUE	TRUE	FALSE	4	FALSE
chrI:1223655-1223995	TRUE	FALSE	FALSE	FALSE	TRUE	2	TRUE
chrI:1224373-1224849	FALSE	FALSE	TRUE	TRUE	TRUE	3	TRUE
chrI:1224881-1225599	TRUE	TRUE	TRUE	TRUE	TRUE	5	TRUE
chrI:1225895-1226256	TRUE	FALSE	TRUE	TRUE	FALSE	3	TRUE
chrI:1226352-1226807	TRUE	TRUE	TRUE	TRUE	TRUE	5	TRUE
chrI:1227036-1227702	TRUE	TRUE	TRUE	TRUE	TRUE	5	TRUE
chrI:1227843-1228198	FALSE	TRUE	FALSE	TRUE	TRUE	3	FALSE
chrI:1228499-1228904	TRUE	TRUE	TRUE	TRUE	TRUE	5	TRUE
chrI:1229282-1229978	TRUE	TRUE	TRUE	TRUE	TRUE	5	TRUE
chrI:1230591-1230959	TRUE	TRUE	TRUE	TRUE	TRUE	5	TRUE
chrI:1231258-1231760	TRUE	TRUE	TRUE	TRUE	TRUE	5	TRUE
chrI:1231952-1232319	TRUE	FALSE	TRUE	TRUE	FALSE	3	TRUE
chrI:1233281-1233521	FALSE	FALSE	FALSE	TRUE	FALSE	1	TRUE
chrI:1233762-1234069	FALSE	FALSE	FALSE	TRUE	FALSE	1	TRUE
chrI:1234691-1235474	TRUE	FALSE	TRUE	TRUE	FALSE	3	TRUE
chrI:1236128-1236520	FALSE	FALSE	FALSE	TRUE	FALSE	1	TRUE
chrI:1239788-1240135	TRUE	FALSE	TRUE	FALSE	FALSE	2	TRUE
chrI:1241393-1242031	TRUE	FALSE	TRUE	TRUE	TRUE	4	TRUE
chrI:1245271-1246259	TRUE	FALSE	TRUE	TRUE	FALSE	3	TRUE
chrI:1246337-1246564	TRUE	FALSE	FALSE	FALSE	FALSE	1	FALSE
chrI:1248479-1248831	TRUE	FALSE	TRUE	FALSE	FALSE	2	TRUE
chrI:1249228-1250189	TRUE	FALSE	TRUE	TRUE	FALSE	3	TRUE
chrI:1250463-1250790	FALSE	FALSE	FALSE	TRUE	FALSE	1	TRUE
chrI:1250930-1251223	TRUE	FALSE	FALSE	FALSE	FALSE	1	TRUE
chrI:1251403-1251894	TRUE	TRUE	TRUE	TRUE	TRUE	5	FALSE
chrI:1252225-1252476	FALSE	FALSE	FALSE	TRUE	FALSE	1	TRUE
chrI:1252618-1252976	TRUE	FALSE	FALSE	FALSE	FALSE	1	TRUE
chrI:1253253-1253536	FALSE	FALSE	FALSE	TRUE	FALSE	1	FALSE
chrI:1253658-1253967	TRUE	FALSE	FALSE	TRUE	FALSE	2	TRUE
chrI:1254291-1254561	FALSE	FALSE	FALSE	TRUE	FALSE	1	TRUE
chrI:1254929-1255295	TRUE	FALSE	TRUE	TRUE	TRUE	4	TRUE
chrI:1255587-1255941	TRUE	FALSE	TRUE	TRUE	TRUE	4	TRUE
chrI:1257246-1257497	TRUE	FALSE	FALSE	FALSE	FALSE	1	TRUE
chrI:1259760-1260123	TRUE	FALSE	TRUE	FALSE	FALSE	2	TRUE
chrI:1260615-1260944	TRUE	FALSE	TRUE	FALSE	FALSE	2	TRUE
chrI:1263397-1264025	TRUE	FALSE	TRUE	FALSE	TRUE	3	TRUE
chrI:1264155-1264611	TRUE	FALSE	TRUE	FALSE	FALSE	2	TRUE
chrI:1264915-1265345	TRUE	TRUE	TRUE	TRUE	TRUE	5	TRUE
chrI:1265602-1266377	TRUE	TRUE	TRUE	TRUE	TRUE	5	TRUE
chrI:1266817-1267388	TRUE	FALSE	TRUE	TRUE	TRUE	4	TRUE
chrI:1268225-1268612	TRUE	TRUE	TRUE	TRUE	TRUE	5	TRUE
chrI:1269320-1269689	TRUE	FALSE	TRUE	FALSE	TRUE	3	TRUE
chrI:1270040-1270306	TRUE	FALSE	FALSE	FALSE	FALSE	1	FALSE
chrI:1270829-1271630	FALSE	TRUE	TRUE	FALSE	FALSE	2	TRUE
chrI:1272130-1272508	TRUE	FALSE	TRUE	FALSE	FALSE	2	TRUE
chrI:1276709-1277178	FALSE	FALSE	TRUE	FALSE	TRUE	2	TRUE
chrI:1277666-1277962	FALSE	FALSE	TRUE	FALSE	FALSE	1	FALSE
chrI:1278461-1278988	TRUE	TRUE	TRUE	TRUE	TRUE	5	FALSE
chrI:1280055-1280490	TRUE	TRUE	TRUE	TRUE	TRUE	5	TRUE
chrI:1280797-1281411	TRUE	FALSE	TRUE	FALSE	FALSE	2	TRUE
chrI:1281546-1281864	FALSE	FALSE	TRUE	FALSE	FALSE	1	TRUE
chrI:1282310-1282794	TRUE	FALSE	TRUE	FALSE	FALSE	2	TRUE
chrI:1283111-1283389	FALSE	FALSE	TRUE	TRUE	TRUE	3	TRUE
chrI:1283671-1283869	FALSE	TRUE	TRUE	FALSE	FALSE	2	FALSE
chrI:1284129-1284636	TRUE	TRUE	TRUE	TRUE	TRUE	5	FALSE
chrI:1285609-1285951	FALSE	FALSE	TRUE	FALSE	TRUE	2	TRUE
chrI:1288660-1288985	FALSE	FALSE	TRUE	FALSE	FALSE	1	FALSE
chrI:1289076-1289377	TRUE	FALSE	TRUE	FALSE	FALSE	2	TRUE
chrI:1291536-1291846	FALSE	FALSE	TRUE	FALSE	FALSE	1	FALSE
chrI:1292351-1292675	TRUE	FALSE	TRUE	FALSE	TRUE	3	TRUE
chrI:1293696-1294176	FALSE	TRUE	TRUE	TRUE	TRUE	4	TRUE
chrI:1295448-1295751	FALSE	TRUE	FALSE	FALSE	FALSE	1	FALSE
chrI:1296063-1296624	TRUE	TRUE	TRUE	TRUE	TRUE	5	FALSE
chrI:1296658-1296998	FALSE	TRUE	FALSE	FALSE	FALSE	1	TRUE
chrI:1297101-1297322	TRUE	FALSE	FALSE	FALSE	FALSE	1	TRUE
chrI:1297460-1297853	FALSE	FALSE	TRUE	TRUE	FALSE	2	TRUE
chrI:1297889-1298138	FALSE	FALSE	TRUE	FALSE	FALSE	1	FALSE
chrI:1298427-1298674	FALSE	FALSE	TRUE	FALSE	FALSE	1	FALSE
chrI:1298979-1299223	FALSE	TRUE	FALSE	FALSE	FALSE	1	FALSE
chrI:1299411-1299910	FALSE	TRUE	TRUE	TRUE	FALSE	3	TRUE
chrI:1300062-1300581	FALSE	TRUE	FALSE	FALSE	FALSE	1	FALSE
chrI:1301076-1301738	TRUE	TRUE	TRUE	TRUE	TRUE	5	TRUE
chrI:1303476-1303967	TRUE	TRUE	TRUE	TRUE	TRUE	5	TRUE
chrI:1304054-1304580	FALSE	TRUE	FALSE	FALSE	FALSE	1	FALSE
chrI:1304638-1304861	TRUE	FALSE	FALSE	FALSE	FALSE	1	FALSE
chrI:1304987-1305355	TRUE	TRUE	TRUE	TRUE	TRUE	5	TRUE
chrI:1305689-1306418	TRUE	TRUE	TRUE	TRUE	TRUE	5	TRUE
chrI:1309962-1310355	FALSE	FALSE	TRUE	FALSE	FALSE	1	TRUE
chrI:1310619-1310871	FALSE	FALSE	TRUE	FALSE	FALSE	1	TRUE
chrI:1312550-1312909	FALSE	TRUE	TRUE	TRUE	FALSE	3	TRUE
chrI:1313108-1313727	TRUE	TRUE	TRUE	TRUE	TRUE	5	FALSE
chrI:1314063-1314702	TRUE	FALSE	TRUE	TRUE	TRUE	4	TRUE
chrI:1315362-1315758	FALSE	TRUE	FALSE	TRUE	FALSE	2	FALSE
chrI:1316077-1316387	FALSE	TRUE	FALSE	FALSE	FALSE	1	FALSE
chrI:1316980-1318070	TRUE	TRUE	TRUE	FALSE	FALSE	3	TRUE
chrI:1318422-1318882	FALSE	FALSE	TRUE	FALSE	FALSE	1	TRUE
chrI:1320635-1321099	TRUE	TRUE	TRUE	TRUE	TRUE	5	TRUE
chrI:1321462-1321786	TRUE	FALSE	TRUE	FALSE	TRUE	3	TRUE
chrI:1321938-1322204	FALSE	FALSE	TRUE	FALSE	FALSE	1	FALSE
chrI:1322490-1322701	FALSE	FALSE	TRUE	FALSE	FALSE	1	TRUE
chrI:1322965-1323264	FALSE	FALSE	TRUE	FALSE	FALSE	1	TRUE
chrI:1323633-1323998	FALSE	TRUE	TRUE	TRUE	FALSE	3	FALSE
chrI:1324275-1324600	FALSE	FALSE	TRUE	FALSE	FALSE	1	TRUE
chrI:1327880-1328627	TRUE	TRUE	TRUE	TRUE	TRUE	5	FALSE
chrI:1332787-1333732	FALSE	FALSE	TRUE	TRUE	FALSE	2	TRUE
chrI:1334278-1335189	FALSE	TRUE	TRUE	TRUE	TRUE	4	TRUE
chrI:1335598-1335985	FALSE	FALSE	TRUE	TRUE	FALSE	2	TRUE
chrI:1336410-1336785	FALSE	TRUE	TRUE	TRUE	FALSE	3	TRUE
chrI:1336812-1337175	TRUE	TRUE	TRUE	FALSE	TRUE	4	FALSE
chrI:1337368-1337720	FALSE	TRUE	TRUE	TRUE	TRUE	4	TRUE
chrI:1337953-1338233	FALSE	TRUE	TRUE	TRUE	TRUE	4	TRUE
chrI:1338267-1338690	TRUE	TRUE	TRUE	TRUE	TRUE	5	TRUE
chrI:1338972-1339391	FALSE	FALSE	TRUE	TRUE	TRUE	3	TRUE
chrI:1339625-1339912	TRUE	FALSE	TRUE	FALSE	FALSE	2	FALSE
chrI:1340034-1340375	TRUE	TRUE	TRUE	TRUE	TRUE	5	TRUE
chrI:1340615-1341116	FALSE	TRUE	FALSE	TRUE	FALSE	2	FALSE
chrI:1341406-1341954	TRUE	FALSE	FALSE	TRUE	FALSE	2	TRUE
chrI:1342846-1343222	FALSE	TRUE	TRUE	TRUE	TRUE	4	TRUE
chrI:1344772-1345172	TRUE	TRUE	TRUE	TRUE	TRUE	5	TRUE
chrI:1345487-1345842	TRUE	TRUE	TRUE	TRUE	TRUE	5	TRUE
chrI:1346215-1346718	TRUE	TRUE	TRUE	TRUE	TRUE	5	TRUE
chrI:1347182-1348076	TRUE	FALSE	TRUE	TRUE	TRUE	4	TRUE
chrI:1348247-1348709	FALSE	FALSE	TRUE	TRUE	FALSE	2	TRUE
chrI:1349166-1349571	FALSE	FALSE	TRUE	TRUE	FALSE	2	TRUE
chrI:1351818-1352123	FALSE	FALSE	TRUE	TRUE	FALSE	2	TRUE
chrI:1352224-1352544	TRUE	FALSE	TRUE	TRUE	FALSE	3	TRUE
chrI:1354469-1354839	FALSE	FALSE	TRUE	FALSE	FALSE	1	TRUE
chrI:1355453-1355837	FALSE	FALSE	FALSE	TRUE	FALSE	1	TRUE
chrI:1356690-1357123	TRUE	FALSE	TRUE	TRUE	FALSE	3	TRUE
chrI:1357331-1357788	TRUE	FALSE	TRUE	FALSE	FALSE	2	TRUE
chrI:1358078-1358394	FALSE	FALSE	FALSE	TRUE	FALSE	1	FALSE
chrI:1358688-1359102	TRUE	FALSE	TRUE	FALSE	TRUE	3	TRUE
chrI:1359229-1359619	FALSE	FALSE	FALSE	TRUE	TRUE	2	TRUE
chrI:1359766-1360008	TRUE	FALSE	FALSE	FALSE	FALSE	1	FALSE
chrI:1360079-1360401	TRUE	FALSE	TRUE	TRUE	FALSE	3	TRUE
chrI:1360643-1361045	TRUE	FALSE	TRUE	TRUE	TRUE	4	TRUE
chrI:1361135-1361582	FALSE	TRUE	TRUE	TRUE	TRUE	4	FALSE
chrI:1361617-1362138	TRUE	FALSE	FALSE	TRUE	FALSE	2	TRUE
chrI:1362595-1362984	TRUE	TRUE	TRUE	TRUE	TRUE	5	TRUE
chrI:1363200-1363632	TRUE	TRUE	TRUE	TRUE	TRUE	5	TRUE
chrI:1363692-1363917	TRUE	FALSE	FALSE	FALSE	FALSE	1	FALSE
chrI:1364746-1365301	TRUE	FALSE	FALSE	TRUE	TRUE	3	TRUE
chrI:1365324-1365601	FALSE	TRUE	FALSE	TRUE	FALSE	2	FALSE
chrI:1365734-1366234	TRUE	TRUE	TRUE	TRUE	TRUE	5	TRUE
chrI:1366486-1366836	TRUE	TRUE	TRUE	TRUE	TRUE	5	TRUE
chrI:1367338-1367830	TRUE	TRUE	TRUE	TRUE	TRUE	5	FALSE
chrI:1367907-1368418	TRUE	FALSE	FALSE	TRUE	FALSE	2	TRUE
chrI:1368521-1369336	TRUE	TRUE	TRUE	TRUE	TRUE	5	TRUE
chrI:1369563-1369922	FALSE	FALSE	TRUE	TRUE	TRUE	3	TRUE
chrI:1370219-1370551	TRUE	FALSE	FALSE	TRUE	FALSE	2	TRUE
chrI:1370678-1371073	TRUE	FALSE	TRUE	TRUE	TRUE	4	TRUE
chrI:1371213-1371323	FALSE	FALSE	FALSE	TRUE	FALSE	1	FALSE
chrI:1371503-1372181	TRUE	TRUE	TRUE	TRUE	TRUE	5	TRUE
chrI:1372346-1372691	FALSE	TRUE	TRUE	TRUE	TRUE	4	TRUE
chrI:1372949-1373383	TRUE	TRUE	TRUE	TRUE	TRUE	5	TRUE
chrI:1373738-1374038	TRUE	FALSE	FALSE	FALSE	FALSE	1	TRUE
chrI:1374095-1374784	FALSE	TRUE	TRUE	TRUE	FALSE	3	TRUE
chrI:1374931-1375412	TRUE	FALSE	TRUE	TRUE	TRUE	4	TRUE
chrI:1375881-1376642	TRUE	FALSE	TRUE	TRUE	TRUE	4	TRUE
chrI:1376805-1377095	FALSE	FALSE	TRUE	FALSE	FALSE	1	TRUE
chrI:1377571-1378191	TRUE	FALSE	TRUE	FALSE	FALSE	2	TRUE
chrI:1380055-1380300	TRUE	FALSE	FALSE	FALSE	FALSE	1	TRUE
chrI:1380554-1381014	TRUE	FALSE	FALSE	TRUE	FALSE	2	TRUE
chrI:1381218-1381499	TRUE	FALSE	FALSE	FALSE	FALSE	1	TRUE
chrI:1383938-1384661	FALSE	FALSE	TRUE	FALSE	FALSE	1	TRUE
chrI:1385570-1385882	TRUE	FALSE	FALSE	FALSE	FALSE	1	TRUE
chrI:1386673-1387202	TRUE	FALSE	FALSE	TRUE	FALSE	2	TRUE
chrI:1388416-1389337	TRUE	FALSE	TRUE	TRUE	FALSE	3	TRUE
chrI:1392451-1393125	FALSE	FALSE	TRUE	TRUE	FALSE	2	TRUE
chrI:1394297-1394661	FALSE	FALSE	TRUE	FALSE	FALSE	1	FALSE
chrI:1396530-1396811	TRUE	FALSE	FALSE	FALSE	FALSE	1	TRUE
chrI:1399476-1399940	FALSE	FALSE	TRUE	TRUE	TRUE	3	TRUE
chrI:1400165-1400658	FALSE	FALSE	TRUE	TRUE	FALSE	2	TRUE
chrI:1401571-1402119	TRUE	FALSE	TRUE	FALSE	TRUE	3	TRUE
chrI:1403069-1403700	TRUE	FALSE	FALSE	FALSE	FALSE	1	TRUE
chrI:1403886-1404203	TRUE	TRUE	TRUE	TRUE	TRUE	5	TRUE
chrI:1404525-1404958	TRUE	TRUE	TRUE	TRUE	TRUE	5	TRUE
chrI:1405321-1406048	FALSE	TRUE	TRUE	TRUE	TRUE	4	TRUE
chrI:1406575-1406932	FALSE	FALSE	TRUE	TRUE	FALSE	2	TRUE
chrI:1407444-1408495	TRUE	FALSE	TRUE	TRUE	TRUE	4	TRUE
chrI:1409562-1410192	FALSE	TRUE	TRUE	TRUE	TRUE	4	TRUE
chrI:1411538-1412583	FALSE	TRUE	TRUE	TRUE	TRUE	4	TRUE
chrI:1413223-1413935	TRUE	TRUE	TRUE	TRUE	TRUE	5	TRUE
chrI:1414791-1415123	TRUE	FALSE	FALSE	FALSE	FALSE	1	TRUE
chrI:1415819-1416507	TRUE	TRUE	TRUE	FALSE	FALSE	3	TRUE
chrI:1416595-1417024	FALSE	FALSE	FALSE	TRUE	FALSE	1	TRUE
chrI:1417127-1417384	TRUE	FALSE	FALSE	FALSE	FALSE	1	TRUE
chrI:1417408-1418651	TRUE	FALSE	FALSE	TRUE	TRUE	3	TRUE
chrI:1419199-1419637	TRUE	FALSE	TRUE	TRUE	TRUE	4	TRUE
chrI:1419975-1420556	TRUE	FALSE	TRUE	TRUE	TRUE	4	TRUE
chrI:1420776-1420995	TRUE	FALSE	FALSE	FALSE	FALSE	1	FALSE
chrI:1421533-1421942	TRUE	FALSE	FALSE	FALSE	FALSE	1	FALSE
chrI:1422246-1422542	TRUE	FALSE	FALSE	FALSE	FALSE	1	TRUE
chrI:1423529-1423859	TRUE	FALSE	FALSE	FALSE	FALSE	1	TRUE
chrI:1424746-1425083	TRUE	FALSE	FALSE	FALSE	FALSE	1	FALSE
chrI:1425291-1425780	TRUE	TRUE	TRUE	TRUE	TRUE	5	TRUE
chrI:1426056-1426650	TRUE	TRUE	TRUE	TRUE	TRUE	5	TRUE
chrI:1426787-1427021	FALSE	FALSE	TRUE	FALSE	FALSE	1	TRUE
chrI:1429658-1430508	TRUE	TRUE	TRUE	TRUE	TRUE	5	TRUE
chrI:1430762-1431054	FALSE	TRUE	TRUE	TRUE	TRUE	4	TRUE
chrI:1434398-1434840	FALSE	FALSE	TRUE	FALSE	TRUE	2	TRUE
chrI:1435155-1435314	FALSE	FALSE	TRUE	FALSE	FALSE	1	FALSE
chrI:1435494-1435900	TRUE	TRUE	TRUE	TRUE	TRUE	5	TRUE
chrI:1437836-1438173	FALSE	FALSE	TRUE	TRUE	FALSE	2	TRUE
chrI:1439938-1440303	FALSE	FALSE	TRUE	TRUE	FALSE	2	TRUE
chrI:1441992-1442341	TRUE	FALSE	FALSE	FALSE	FALSE	1	TRUE
chrI:1443994-1444333	TRUE	TRUE	TRUE	TRUE	TRUE	5	FALSE
chrI:1444458-1444813	TRUE	TRUE	TRUE	TRUE	TRUE	5	TRUE
chrI:1444988-1445163	FALSE	TRUE	TRUE	FALSE	FALSE	2	TRUE
chrI:1445471-1445802	TRUE	FALSE	TRUE	TRUE	TRUE	4	TRUE
chrI:1446037-1446349	FALSE	TRUE	TRUE	TRUE	TRUE	4	TRUE
chrI:1446370-1447307	TRUE	TRUE	TRUE	TRUE	TRUE	5	TRUE
chrI:1447555-1447833	TRUE	FALSE	TRUE	TRUE	FALSE	3	TRUE
chrI:1447921-1448291	FALSE	TRUE	TRUE	TRUE	FALSE	3	TRUE
chrI:1448772-1449354	FALSE	TRUE	TRUE	FALSE	TRUE	3	TRUE
chrI:1450303-1450940	FALSE	FALSE	TRUE	TRUE	TRUE	3	TRUE
chrI:1452249-1452635	FALSE	FALSE	TRUE	FALSE	TRUE	2	TRUE
chrI:1453368-1454062	FALSE	TRUE	TRUE	TRUE	TRUE	4	TRUE
chrI:1455242-1455621	FALSE	FALSE	TRUE	TRUE	TRUE	3	TRUE
chrI:1458547-1458852	FALSE	FALSE	TRUE	FALSE	FALSE	1	TRUE
chrI:1459161-1459480	TRUE	FALSE	TRUE	FALSE	FALSE	2	FALSE
chrI:1459658-1459929	FALSE	FALSE	TRUE	FALSE	FALSE	1	TRUE
chrI:1460959-1461353	FALSE	FALSE	TRUE	TRUE	TRUE	3	TRUE
chrI:1462125-1463212	FALSE	TRUE	TRUE	TRUE	TRUE	4	TRUE
chrI:1463676-1464023	FALSE	FALSE	TRUE	FALSE	FALSE	1	TRUE
chrI:1468241-1468584	FALSE	FALSE	TRUE	FALSE	FALSE	1	TRUE
chrI:1469006-1469271	FALSE	FALSE	TRUE	FALSE	FALSE	1	TRUE
chrI:1476004-1476425	FALSE	FALSE	TRUE	TRUE	FALSE	2	TRUE
chrI:1477032-1477392	FALSE	FALSE	TRUE	FALSE	FALSE	1	TRUE
chrI:1478170-1478736	FALSE	FALSE	TRUE	FALSE	FALSE	1	FALSE
chrI:1479025-1479244	FALSE	FALSE	TRUE	FALSE	FALSE	1	FALSE
chrI:1479475-1479808	FALSE	FALSE	TRUE	FALSE	FALSE	1	FALSE
chrI:1480487-1480902	TRUE	FALSE	TRUE	TRUE	TRUE	4	TRUE
chrI:1481199-1481752	FALSE	TRUE	TRUE	TRUE	FALSE	3	TRUE
chrI:1481823-1482196	TRUE	FALSE	TRUE	TRUE	TRUE	4	FALSE
chrI:1482497-1482969	TRUE	FALSE	TRUE	TRUE	TRUE	4	TRUE
chrI:1484023-1484369	FALSE	FALSE	TRUE	FALSE	FALSE	1	TRUE
chrI:1484778-1485100	FALSE	FALSE	TRUE	FALSE	FALSE	1	TRUE
chrI:1485585-1485953	FALSE	FALSE	TRUE	TRUE	FALSE	2	TRUE
chrI:1486753-1487134	FALSE	FALSE	TRUE	TRUE	TRUE	3	TRUE
chrI:1487422-1487798	TRUE	FALSE	TRUE	FALSE	TRUE	3	FALSE
chrI:1488095-1488547	TRUE	TRUE	TRUE	TRUE	TRUE	5	TRUE
chrI:1488739-1489022	TRUE	FALSE	FALSE	FALSE	FALSE	1	FALSE
chrI:1489032-1489264	FALSE	TRUE	FALSE	FALSE	FALSE	1	FALSE
chrI:1489358-1489709	TRUE	TRUE	TRUE	TRUE	TRUE	5	FALSE
chrI:1489925-1490325	TRUE	TRUE	TRUE	TRUE	TRUE	5	FALSE
chrI:1490762-1491144	TRUE	FALSE	FALSE	FALSE	FALSE	1	TRUE
chrI:1492874-1493162	TRUE	FALSE	FALSE	FALSE	FALSE	1	TRUE
chrI:1493313-1493897	TRUE	TRUE	TRUE	TRUE	TRUE	5	TRUE
chrI:1494150-1494665	TRUE	FALSE	TRUE	TRUE	TRUE	4	TRUE
chrI:1497761-1498158	FALSE	FALSE	TRUE	TRUE	TRUE	3	TRUE
chrI:1498414-1498612	FALSE	FALSE	FALSE	TRUE	FALSE	1	TRUE
chrI:1503189-1503497	TRUE	FALSE	FALSE	FALSE	FALSE	1	TRUE
chrI:1503795-1504159	TRUE	FALSE	FALSE	FALSE	FALSE	1	FALSE
chrI:1504939-1505154	FALSE	FALSE	TRUE	FALSE	FALSE	1	TRUE
chrI:1506024-1506366	FALSE	FALSE	TRUE	FALSE	FALSE	1	TRUE
chrI:1508548-1509068	TRUE	FALSE	TRUE	TRUE	FALSE	3	TRUE
chrI:1510124-1510598	FALSE	FALSE	TRUE	TRUE	FALSE	2	TRUE
chrI:1510951-1511223	TRUE	FALSE	FALSE	FALSE	FALSE	1	TRUE
chrI:1511246-1511577	FALSE	FALSE	FALSE	TRUE	FALSE	1	FALSE
chrI:1512482-1512836	FALSE	FALSE	FALSE	TRUE	FALSE	1	TRUE
chrI:1513379-1513845	TRUE	FALSE	FALSE	TRUE	FALSE	2	TRUE
chrI:1514426-1514803	TRUE	FALSE	TRUE	FALSE	FALSE	2	TRUE
chrI:1515312-1515641	FALSE	FALSE	TRUE	FALSE	FALSE	1	FALSE
chrI:1519543-1519916	FALSE	FALSE	TRUE	TRUE	FALSE	2	FALSE
chrI:1521276-1521790	TRUE	FALSE	TRUE	TRUE	FALSE	3	TRUE
chrI:1521971-1522344	FALSE	FALSE	TRUE	TRUE	FALSE	2	TRUE
chrI:1522578-1523250	TRUE	FALSE	TRUE	TRUE	FALSE	3	TRUE
chrI:1524819-1525853	FALSE	FALSE	TRUE	TRUE	FALSE	2	TRUE
chrI:1526779-1527089	FALSE	FALSE	TRUE	FALSE	FALSE	1	TRUE
chrI:1529278-1529717	FALSE	FALSE	TRUE	TRUE	TRUE	3	TRUE
chrI:1529948-1530153	FALSE	FALSE	FALSE	TRUE	FALSE	1	FALSE
chrI:1532254-1532806	FALSE	FALSE	TRUE	TRUE	FALSE	2	TRUE
chrI:1532864-1533224	FALSE	FALSE	FALSE	TRUE	FALSE	1	TRUE
chrI:1533323-1533731	TRUE	FALSE	FALSE	FALSE	FALSE	1	FALSE
chrI:1533955-1534323	FALSE	FALSE	FALSE	TRUE	FALSE	1	FALSE
chrI:1535169-1535443	FALSE	FALSE	FALSE	TRUE	FALSE	1	TRUE
chrI:1535726-1536294	TRUE	FALSE	TRUE	TRUE	FALSE	3	TRUE
chrI:1536485-1536825	TRUE	FALSE	FALSE	TRUE	FALSE	2	TRUE
chrI:1537184-1537487	FALSE	FALSE	FALSE	TRUE	FALSE	1	FALSE
chrI:1537903-1538210	FALSE	FALSE	FALSE	TRUE	FALSE	1	TRUE
chrI:1538357-1538702	TRUE	FALSE	FALSE	TRUE	FALSE	2	TRUE
chrI:1538964-1539300	FALSE	FALSE	FALSE	TRUE	FALSE	1	FALSE
chrI:1540102-1540941	TRUE	TRUE	TRUE	TRUE	FALSE	4	FALSE
chrI:1541066-1541664	TRUE	FALSE	TRUE	TRUE	TRUE	4	TRUE
chrI:1541909-1542236	TRUE	FALSE	TRUE	TRUE	TRUE	4	TRUE
chrI:1542498-1543385	TRUE	TRUE	TRUE	TRUE	TRUE	5	TRUE
chrI:1543582-1543894	FALSE	FALSE	TRUE	TRUE	FALSE	2	FALSE
chrI:1544318-1544712	FALSE	FALSE	TRUE	TRUE	FALSE	2	TRUE
chrI:1544774-1545032	FALSE	FALSE	FALSE	TRUE	FALSE	1	FALSE
chrI:1545339-1545609	TRUE	FALSE	TRUE	FALSE	FALSE	2	TRUE
chrI:1545878-1546450	TRUE	FALSE	TRUE	TRUE	TRUE	4	TRUE
chrI:1547595-1548051	TRUE	FALSE	TRUE	TRUE	TRUE	4	TRUE
chrI:1548368-1548888	TRUE	FALSE	TRUE	TRUE	TRUE	4	TRUE
chrI:1548962-1549215	FALSE	FALSE	TRUE	TRUE	TRUE	3	TRUE
chrI:1549499-1549905	TRUE	FALSE	FALSE	TRUE	TRUE	3	FALSE
chrI:1550098-1550758	TRUE	FALSE	FALSE	TRUE	TRUE	3	TRUE
chrI:1551362-1552005	FALSE	FALSE	FALSE	TRUE	FALSE	1	TRUE
chrI:1552764-1553488	TRUE	FALSE	TRUE	TRUE	TRUE	4	TRUE
chrI:1553590-1553938	FALSE	FALSE	FALSE	TRUE	FALSE	1	FALSE
chrI:1554161-1555055	TRUE	FALSE	TRUE	TRUE	FALSE	3	TRUE
chrI:1555283-1555657	TRUE	FALSE	TRUE	TRUE	TRUE	4	TRUE
chrI:1555989-1556382	TRUE	FALSE	FALSE	TRUE	FALSE	2	FALSE
chrI:1557321-1557690	FALSE	FALSE	TRUE	TRUE	FALSE	2	TRUE
chrI:1558056-1558836	TRUE	TRUE	TRUE	TRUE	TRUE	5	TRUE
chrI:1559021-1559874	TRUE	TRUE	FALSE	TRUE	FALSE	3	FALSE
chrI:1560088-1560482	FALSE	FALSE	TRUE	TRUE	TRUE	3	TRUE
chrI:1561288-1561660	TRUE	FALSE	FALSE	TRUE	FALSE	2	TRUE
chrI:1562497-1563008	FALSE	TRUE	TRUE	TRUE	TRUE	4	FALSE
chrI:1563398-1563789	FALSE	FALSE	TRUE	TRUE	FALSE	2	TRUE
chrI:1564132-1564571	TRUE	TRUE	TRUE	TRUE	TRUE	5	TRUE
chrI:1564904-1565310	TRUE	TRUE	FALSE	FALSE	TRUE	3	TRUE
chrI:1565629-1565859	FALSE	FALSE	FALSE	TRUE	FALSE	1	TRUE
chrI:1566109-1566477	FALSE	FALSE	FALSE	TRUE	FALSE	1	TRUE
chrI:1566673-1567367	TRUE	FALSE	TRUE	TRUE	TRUE	4	TRUE
chrI:1567517-1567719	FALSE	FALSE	FALSE	TRUE	FALSE	1	TRUE
chrI:1568742-1569037	FALSE	FALSE	FALSE	TRUE	FALSE	1	TRUE
chrI:1569370-1570691	TRUE	FALSE	TRUE	TRUE	FALSE	3	TRUE
chrI:1573156-1573633	TRUE	FALSE	TRUE	TRUE	TRUE	4	TRUE
chrI:1574718-1575052	TRUE	FALSE	FALSE	FALSE	FALSE	1	TRUE
chrI:1575490-1575883	TRUE	TRUE	TRUE	TRUE	TRUE	5	TRUE
chrI:1576143-1576599	TRUE	FALSE	FALSE	TRUE	FALSE	2	TRUE
chrI:1576798-1577249	TRUE	FALSE	TRUE	TRUE	TRUE	4	TRUE
chrI:1577457-1577867	FALSE	FALSE	FALSE	TRUE	FALSE	1	FALSE
chrI:1579497-1579835	TRUE	FALSE	TRUE	TRUE	TRUE	4	TRUE
chrI:1580137-1581213	TRUE	TRUE	TRUE	TRUE	FALSE	4	TRUE
chrI:1581543-1581913	FALSE	FALSE	TRUE	TRUE	TRUE	3	TRUE
chrI:1582335-1582734	TRUE	TRUE	TRUE	TRUE	TRUE	5	TRUE
chrI:1582969-1583362	TRUE	FALSE	TRUE	FALSE	FALSE	2	FALSE
chrI:1583629-1583925	TRUE	FALSE	FALSE	FALSE	FALSE	1	TRUE
chrI:1586534-1586885	TRUE	FALSE	TRUE	FALSE	FALSE	2	TRUE
chrI:1588036-1588490	FALSE	TRUE	FALSE	FALSE	FALSE	1	FALSE
chrI:1590056-1590294	FALSE	FALSE	TRUE	FALSE	FALSE	1	TRUE
chrI:1591277-1591501	FALSE	FALSE	TRUE	FALSE	FALSE	1	TRUE
chrI:1591757-1592098	FALSE	FALSE	TRUE	TRUE	TRUE	3	TRUE
chrI:1593618-1593951	TRUE	FALSE	TRUE	FALSE	FALSE	2	TRUE
chrI:1594247-1594686	TRUE	FALSE	TRUE	TRUE	TRUE	4	TRUE
chrI:1595599-1596122	TRUE	FALSE	TRUE	TRUE	TRUE	4	TRUE
chrI:1596248-1596520	TRUE	FALSE	FALSE	FALSE	FALSE	1	FALSE
chrI:1596993-1597346	FALSE	TRUE	TRUE	TRUE	TRUE	4	TRUE
chrI:1597933-1598391	TRUE	FALSE	TRUE	FALSE	TRUE	3	TRUE
chrI:1598843-1599194	TRUE	FALSE	TRUE	TRUE	FALSE	3	TRUE
chrI:1599597-1599956	FALSE	FALSE	TRUE	TRUE	FALSE	2	TRUE
chrI:1609973-1610315	FALSE	FALSE	TRUE	FALSE	FALSE	1	TRUE
chrI:1610939-1611469	TRUE	TRUE	TRUE	TRUE	TRUE	5	TRUE
chrI:1611722-1612069	FALSE	TRUE	TRUE	TRUE	TRUE	4	FALSE
chrI:1612419-1612839	FALSE	FALSE	TRUE	TRUE	TRUE	3	TRUE
chrI:1613087-1613350	FALSE	FALSE	TRUE	TRUE	FALSE	2	TRUE
chrI:1613811-1614810	TRUE	FALSE	TRUE	TRUE	FALSE	3	TRUE
chrI:1615680-1615992	FALSE	FALSE	TRUE	FALSE	FALSE	1	TRUE
chrI:1619748-1620012	FALSE	TRUE	FALSE	FALSE	FALSE	1	FALSE
chrI:1620057-1620541	TRUE	TRUE	TRUE	TRUE	TRUE	5	FALSE
chrI:1621475-1621859	FALSE	TRUE	TRUE	TRUE	FALSE	3	FALSE
chrI:1621911-1622559	TRUE	TRUE	TRUE	FALSE	FALSE	3	FALSE
chrI:1622643-1623079	FALSE	TRUE	TRUE	TRUE	TRUE	4	TRUE
chrI:1623369-1623724	TRUE	TRUE	TRUE	TRUE	TRUE	5	TRUE
chrI:1623905-1624177	TRUE	FALSE	TRUE	TRUE	FALSE	3	TRUE
chrI:1625059-1625365	FALSE	FALSE	TRUE	FALSE	TRUE	2	TRUE
chrI:1625552-1625833	FALSE	TRUE	TRUE	FALSE	FALSE	2	TRUE
chrI:1626008-1626281	FALSE	FALSE	TRUE	TRUE	TRUE	3	TRUE
chrI:1626670-1627035	TRUE	FALSE	TRUE	TRUE	TRUE	4	TRUE
chrI:1627263-1627633	TRUE	TRUE	TRUE	TRUE	TRUE	5	TRUE
chrI:1627830-1627999	TRUE	FALSE	FALSE	FALSE	FALSE	1	TRUE
chrI:1628257-1629027	TRUE	TRUE	TRUE	TRUE	TRUE	5	TRUE
chrI:1629622-1629952	FALSE	TRUE	TRUE	TRUE	TRUE	4	TRUE
chrI:1630177-1630465	FALSE	FALSE	TRUE	TRUE	FALSE	2	TRUE
chrI:1631856-1632129	FALSE	FALSE	FALSE	TRUE	FALSE	1	TRUE
chrI:1632544-1632998	TRUE	FALSE	TRUE	TRUE	TRUE	4	TRUE
chrI:1633180-1633408	FALSE	FALSE	FALSE	TRUE	FALSE	1	FALSE
chrI:1633724-1634001	FALSE	FALSE	TRUE	FALSE	FALSE	1	TRUE
chrI:1634179-1634540	FALSE	FALSE	TRUE	TRUE	TRUE	3	TRUE
chrI:1635023-1635358	FALSE	FALSE	TRUE	FALSE	FALSE	1	TRUE
chrI:1638034-1638501	FALSE	FALSE	TRUE	TRUE	TRUE	3	TRUE
chrI:1639420-1640065	FALSE	TRUE	TRUE	TRUE	TRUE	4	TRUE
chrI:1640457-1640831	FALSE	TRUE	TRUE	TRUE	TRUE	4	FALSE
chrI:1641124-1641541	FALSE	TRUE	TRUE	FALSE	FALSE	2	FALSE
chrI:1642483-1642691	FALSE	FALSE	TRUE	FALSE	FALSE	1	FALSE
chrI:1643086-1643796	TRUE	TRUE	TRUE	TRUE	TRUE	5	TRUE
chrI:1645035-1645461	FALSE	FALSE	TRUE	TRUE	FALSE	2	TRUE
chrI:1646415-1646858	TRUE	FALSE	TRUE	FALSE	TRUE	3	TRUE
chrI:1646920-1647141	FALSE	FALSE	TRUE	FALSE	FALSE	1	FALSE
chrI:1647377-1648067	TRUE	TRUE	TRUE	TRUE	FALSE	4	TRUE
chrI:1648671-1649297	TRUE	FALSE	TRUE	FALSE	FALSE	2	TRUE
chrI:1649994-1650381	FALSE	FALSE	TRUE	TRUE	TRUE	3	TRUE
chrI:1651271-1651611	FALSE	TRUE	FALSE	FALSE	FALSE	1	FALSE
chrI:1655952-1656201	FALSE	FALSE	TRUE	FALSE	FALSE	1	TRUE
chrI:1660456-1660784	FALSE	FALSE	TRUE	FALSE	FALSE	1	TRUE
chrI:1661149-1663174	TRUE	TRUE	TRUE	TRUE	TRUE	5	TRUE
chrI:1664696-1665007	TRUE	FALSE	FALSE	FALSE	FALSE	1	FALSE
chrI:1665356-1665657	FALSE	FALSE	TRUE	FALSE	TRUE	2	TRUE
chrI:1665887-1666286	FALSE	FALSE	TRUE	TRUE	TRUE	3	TRUE
chrI:1666890-1667321	FALSE	FALSE	TRUE	FALSE	FALSE	1	FALSE
chrI:1667761-1668201	TRUE	FALSE	TRUE	TRUE	FALSE	3	FALSE
chrI:1669029-1669413	FALSE	TRUE	TRUE	TRUE	TRUE	4	TRUE
chrI:1669809-1670018	FALSE	FALSE	TRUE	FALSE	FALSE	1	FALSE
chrI:1670444-1670924	FALSE	TRUE	TRUE	TRUE	TRUE	4	TRUE
chrI:1671446-1671900	FALSE	FALSE	TRUE	TRUE	TRUE	3	TRUE
chrI:1672263-1672698	FALSE	TRUE	TRUE	TRUE	TRUE	4	TRUE
chrI:1673256-1673725	FALSE	FALSE	TRUE	TRUE	TRUE	3	TRUE
chrI:1675443-1676237	TRUE	FALSE	TRUE	FALSE	FALSE	2	TRUE
chrI:1676544-1676925	FALSE	TRUE	TRUE	FALSE	FALSE	2	TRUE
chrI:1678239-1678847	TRUE	FALSE	TRUE	FALSE	FALSE	2	TRUE
chrI:1679499-1679833	FALSE	FALSE	TRUE	FALSE	FALSE	1	TRUE
chrI:1680537-1680897	FALSE	FALSE	TRUE	FALSE	FALSE	1	FALSE
chrI:1681209-1681525	FALSE	TRUE	TRUE	TRUE	FALSE	3	FALSE
chrI:1681989-1682623	FALSE	FALSE	TRUE	FALSE	TRUE	2	TRUE
chrI:1683547-1683840	FALSE	FALSE	TRUE	FALSE	FALSE	1	TRUE
chrI:1684088-1684785	FALSE	FALSE	TRUE	TRUE	FALSE	2	TRUE
chrI:1685458-1685722	FALSE	FALSE	TRUE	FALSE	FALSE	1	TRUE
chrI:1685915-1686227	TRUE	TRUE	TRUE	TRUE	TRUE	5	TRUE
chrI:1686746-1687088	TRUE	FALSE	TRUE	FALSE	FALSE	2	TRUE
chrI:1687260-1687589	TRUE	TRUE	TRUE	TRUE	TRUE	5	TRUE
chrI:1687800-1688184	FALSE	TRUE	FALSE	FALSE	FALSE	1	FALSE
chrI:1688296-1688612	TRUE	FALSE	FALSE	FALSE	FALSE	1	TRUE
chrI:1689099-1689514	TRUE	TRUE	TRUE	TRUE	TRUE	5	TRUE
chrI:1690622-1691713	TRUE	TRUE	TRUE	TRUE	TRUE	5	TRUE
chrI:1691914-1692331	TRUE	FALSE	FALSE	TRUE	FALSE	2	TRUE
chrI:1692481-1693524	TRUE	TRUE	TRUE	TRUE	FALSE	4	TRUE
chrI:1693886-1694278	TRUE	FALSE	FALSE	FALSE	FALSE	1	TRUE
chrI:1694293-1694570	FALSE	FALSE	FALSE	TRUE	FALSE	1	TRUE
chrI:1694596-1695473	TRUE	TRUE	TRUE	TRUE	TRUE	5	TRUE
chrI:1695626-1696146	TRUE	TRUE	TRUE	TRUE	TRUE	5	TRUE
chrI:1696271-1696852	TRUE	FALSE	FALSE	TRUE	TRUE	3	TRUE
chrI:1697042-1697356	TRUE	TRUE	TRUE	TRUE	TRUE	5	FALSE
chrI:1697610-1698102	TRUE	TRUE	TRUE	TRUE	TRUE	5	FALSE
chrI:1698412-1698981	TRUE	TRUE	TRUE	TRUE	TRUE	5	TRUE
chrI:1699098-1699627	TRUE	TRUE	TRUE	TRUE	TRUE	5	TRUE
chrI:1700238-1700668	FALSE	TRUE	TRUE	TRUE	TRUE	4	TRUE
chrI:1701021-1701427	TRUE	TRUE	TRUE	TRUE	FALSE	4	TRUE
chrI:1701707-1702086	TRUE	TRUE	TRUE	FALSE	FALSE	3	TRUE
chrI:1702667-1702970	TRUE	FALSE	FALSE	FALSE	FALSE	1	TRUE
chrI:1703248-1703866	TRUE	FALSE	FALSE	FALSE	FALSE	1	TRUE
chrI:1706366-1706882	TRUE	FALSE	FALSE	FALSE	TRUE	2	TRUE
chrI:1708848-1709197	TRUE	FALSE	FALSE	FALSE	FALSE	1	TRUE
chrI:1711124-1711319	FALSE	FALSE	TRUE	FALSE	FALSE	1	TRUE
chrI:1712285-1712858	FALSE	FALSE	TRUE	TRUE	FALSE	2	TRUE
chrI:1715608-1716009	TRUE	TRUE	TRUE	TRUE	TRUE	5	TRUE
chrI:1716432-1716828	TRUE	TRUE	TRUE	TRUE	TRUE	5	TRUE
chrI:1717039-1717800	TRUE	TRUE	TRUE	TRUE	TRUE	5	TRUE
chrI:1718355-1718813	TRUE	FALSE	TRUE	FALSE	FALSE	2	TRUE
chrI:1718965-1719265	FALSE	TRUE	FALSE	TRUE	FALSE	2	TRUE
chrI:1719443-1719841	TRUE	TRUE	TRUE	TRUE	TRUE	5	TRUE
chrI:1720124-1720600	TRUE	TRUE	TRUE	TRUE	TRUE	5	TRUE
chrI:1720867-1721365	TRUE	TRUE	TRUE	TRUE	TRUE	5	TRUE
chrI:1721635-1721863	FALSE	FALSE	TRUE	FALSE	FALSE	1	FALSE
chrI:1722529-1722899	FALSE	TRUE	TRUE	TRUE	TRUE	4	TRUE
chrI:1725100-1726038	FALSE	FALSE	TRUE	TRUE	TRUE	3	TRUE
chrI:1727577-1727959	FALSE	FALSE	TRUE	TRUE	TRUE	3	TRUE
chrI:1729281-1729450	TRUE	FALSE	FALSE	FALSE	FALSE	1	TRUE
chrI:1729955-1730629	TRUE	FALSE	FALSE	TRUE	FALSE	2	TRUE
chrI:1731627-1732121	TRUE	FALSE	TRUE	FALSE	FALSE	2	TRUE
chrI:1732294-1732634	TRUE	FALSE	TRUE	FALSE	TRUE	3	TRUE
chrI:1739262-1739689	TRUE	FALSE	TRUE	TRUE	TRUE	4	TRUE
chrI:1739768-1740263	TRUE	TRUE	TRUE	TRUE	TRUE	5	TRUE
chrI:1740853-1741301	TRUE	TRUE	TRUE	TRUE	TRUE	5	TRUE
chrI:1741681-1742320	TRUE	FALSE	TRUE	TRUE	FALSE	3	TRUE
chrI:1742971-1743316	TRUE	FALSE	TRUE	FALSE	FALSE	2	TRUE
chrI:1743493-1744003	TRUE	FALSE	TRUE	TRUE	TRUE	4	TRUE
chrI:1744059-1744652	FALSE	FALSE	TRUE	TRUE	FALSE	2	TRUE
chrI:1744901-1745444	TRUE	FALSE	TRUE	TRUE	FALSE	3	TRUE
chrI:1745749-1746006	FALSE	FALSE	FALSE	TRUE	FALSE	1	FALSE
chrI:1746099-1747636	TRUE	TRUE	TRUE	TRUE	TRUE	5	TRUE
chrI:1751093-1751386	TRUE	FALSE	FALSE	FALSE	FALSE	1	FALSE
chrI:1751446-1751747	FALSE	FALSE	FALSE	TRUE	FALSE	1	FALSE
chrI:1751943-1752514	TRUE	FALSE	TRUE	TRUE	FALSE	3	TRUE
chrI:1754485-1755198	TRUE	FALSE	FALSE	FALSE	FALSE	1	TRUE
chrI:1755548-1756127	TRUE	TRUE	TRUE	TRUE	TRUE	5	TRUE
chrI:1756133-1756702	TRUE	FALSE	TRUE	FALSE	FALSE	2	TRUE
chrI:1757182-1757476	FALSE	FALSE	TRUE	TRUE	FALSE	2	TRUE
chrI:1757888-1758223	FALSE	FALSE	TRUE	FALSE	FALSE	1	TRUE
chrI:1758250-1758810	TRUE	FALSE	TRUE	TRUE	TRUE	4	TRUE
chrI:1760832-1762196	TRUE	TRUE	TRUE	TRUE	TRUE	5	TRUE
chrI:1767146-1767487	TRUE	FALSE	FALSE	FALSE	FALSE	1	TRUE
chrI:1769219-1769559	TRUE	FALSE	FALSE	FALSE	FALSE	1	TRUE
chrI:1771548-1771850	FALSE	FALSE	FALSE	TRUE	FALSE	1	TRUE
chrI:1771912-1772292	TRUE	FALSE	FALSE	FALSE	FALSE	1	TRUE
chrI:1772545-1772832	FALSE	FALSE	FALSE	TRUE	FALSE	1	TRUE
chrI:1773155-1774176	TRUE	FALSE	TRUE	TRUE	TRUE	4	TRUE
chrI:1774363-1775008	TRUE	FALSE	TRUE	TRUE	TRUE	4	TRUE
chrI:1775322-1775901	TRUE	FALSE	TRUE	TRUE	TRUE	4	TRUE
chrI:1776045-1776317	TRUE	FALSE	FALSE	FALSE	FALSE	1	FALSE
chrI:1777256-1777578	FALSE	FALSE	FALSE	TRUE	FALSE	1	FALSE
chrI:1777808-1778185	TRUE	FALSE	TRUE	TRUE	TRUE	4	TRUE
chrI:1778677-1779710	TRUE	FALSE	TRUE	TRUE	TRUE	4	TRUE
chrI:1779837-1780159	FALSE	FALSE	FALSE	TRUE	FALSE	1	FALSE
chrI:1780383-1780767	TRUE	FALSE	TRUE	TRUE	FALSE	3	TRUE
chrI:1781203-1781447	FALSE	FALSE	FALSE	TRUE	FALSE	1	FALSE
chrI:1781642-1782120	TRUE	FALSE	TRUE	TRUE	FALSE	3	TRUE
chrI:1782454-1782738	FALSE	FALSE	FALSE	TRUE	FALSE	1	TRUE
chrI:1783056-1783476	FALSE	FALSE	FALSE	TRUE	FALSE	1	TRUE
chrI:1790189-1790494	FALSE	FALSE	TRUE	FALSE	FALSE	1	TRUE
chrI:1791697-1791987	FALSE	FALSE	TRUE	FALSE	TRUE	2	TRUE
chrI:1792051-1792511	TRUE	FALSE	TRUE	TRUE	TRUE	4	TRUE
chrI:1792925-1793284	TRUE	FALSE	TRUE	TRUE	FALSE	3	TRUE
chrI:1793624-1793911	FALSE	FALSE	TRUE	FALSE	FALSE	1	TRUE
chrI:1794091-1794343	FALSE	FALSE	TRUE	FALSE	FALSE	1	TRUE
chrI:1794610-1794828	FALSE	FALSE	TRUE	FALSE	FALSE	1	FALSE
chrI:1795041-1795300	FALSE	FALSE	TRUE	FALSE	FALSE	1	TRUE
chrI:1795612-1795933	FALSE	FALSE	TRUE	FALSE	FALSE	1	TRUE
chrI:1797157-1797553	FALSE	TRUE	TRUE	TRUE	TRUE	4	TRUE
chrI:1800029-1800444	FALSE	FALSE	TRUE	TRUE	TRUE	3	TRUE
chrI:1802932-1803302	FALSE	FALSE	TRUE	FALSE	FALSE	1	TRUE
chrI:1809591-1810007	FALSE	TRUE	TRUE	TRUE	TRUE	4	TRUE
chrI:1810284-1810531	FALSE	FALSE	TRUE	FALSE	TRUE	2	TRUE
chrI:1810693-1811034	FALSE	FALSE	TRUE	TRUE	FALSE	2	TRUE
chrI:1813577-1813891	FALSE	FALSE	TRUE	TRUE	TRUE	3	TRUE
chrI:1815588-1815997	FALSE	TRUE	TRUE	TRUE	TRUE	4	FALSE
chrI:1816509-1816975	TRUE	TRUE	TRUE	TRUE	TRUE	5	FALSE
chrI:1817630-1817943	FALSE	TRUE	TRUE	TRUE	FALSE	3	FALSE
chrI:1818671-1819023	FALSE	FALSE	TRUE	FALSE	FALSE	1	TRUE
chrI:1819343-1819697	FALSE	TRUE	TRUE	TRUE	TRUE	4	TRUE
chrI:1820103-1820478	FALSE	TRUE	TRUE	FALSE	FALSE	2	TRUE
chrI:1820808-1821208	FALSE	FALSE	TRUE	FALSE	FALSE	1	TRUE
chrI:1821555-1822118	FALSE	FALSE	TRUE	TRUE	TRUE	3	TRUE
chrI:1822380-1822913	FALSE	TRUE	TRUE	TRUE	TRUE	4	TRUE
chrI:1823122-1823486	FALSE	TRUE	TRUE	TRUE	TRUE	4	FALSE
chrI:1824586-1825113	TRUE	FALSE	TRUE	TRUE	FALSE	3	TRUE
chrI:1825973-1826347	FALSE	TRUE	TRUE	TRUE	FALSE	3	TRUE
chrI:1828394-1828815	FALSE	FALSE	TRUE	FALSE	FALSE	1	TRUE
chrI:1831119-1831531	TRUE	FALSE	TRUE	FALSE	FALSE	2	TRUE
chrI:1832492-1833110	TRUE	TRUE	TRUE	TRUE	FALSE	4	TRUE
chrI:1834184-1834467	FALSE	FALSE	FALSE	TRUE	FALSE	1	FALSE
chrI:1834833-1835145	FALSE	FALSE	FALSE	TRUE	TRUE	2	FALSE
chrI:1835410-1835984	TRUE	TRUE	TRUE	TRUE	TRUE	5	FALSE
chrI:1836181-1837399	TRUE	TRUE	TRUE	TRUE	TRUE	5	FALSE
chrI:1837472-1837934	TRUE	TRUE	TRUE	TRUE	TRUE	5	TRUE
chrI:1838291-1838695	TRUE	FALSE	TRUE	FALSE	TRUE	3	TRUE
chrI:1838954-1839210	TRUE	FALSE	FALSE	FALSE	FALSE	1	FALSE
chrI:1839641-1840056	TRUE	TRUE	TRUE	TRUE	TRUE	5	TRUE
chrI:1840428-1840754	TRUE	FALSE	TRUE	TRUE	FALSE	3	TRUE
chrI:1841478-1841726	FALSE	FALSE	FALSE	FALSE	TRUE	1	FALSE
chrI:1841893-1842456	TRUE	TRUE	TRUE	TRUE	TRUE	5	TRUE
chrI:1843179-1843535	TRUE	FALSE	FALSE	TRUE	FALSE	2	FALSE
chrI:1843894-1844347	TRUE	TRUE	TRUE	TRUE	TRUE	5	TRUE
chrI:1844673-1845569	TRUE	TRUE	TRUE	FALSE	FALSE	3	TRUE
chrI:1845694-1846006	FALSE	FALSE	TRUE	FALSE	TRUE	2	TRUE
chrI:1846185-1846389	FALSE	FALSE	TRUE	FALSE	FALSE	1	TRUE
chrI:1846726-1847136	FALSE	FALSE	TRUE	TRUE	TRUE	3	TRUE
chrI:1847506-1847994	FALSE	FALSE	TRUE	FALSE	FALSE	1	TRUE
chrI:1848581-1848838	FALSE	FALSE	TRUE	FALSE	FALSE	1	TRUE
chrI:1849111-1849443	FALSE	FALSE	TRUE	TRUE	TRUE	3	TRUE
chrI:1849682-1849958	FALSE	FALSE	TRUE	TRUE	TRUE	3	TRUE
chrI:1851135-1851676	TRUE	FALSE	TRUE	FALSE	TRUE	3	TRUE
chrI:1852409-1853335	FALSE	TRUE	TRUE	TRUE	TRUE	4	FALSE
chrI:1858803-1859088	FALSE	FALSE	TRUE	FALSE	FALSE	1	TRUE
chrI:1862444-1862938	TRUE	FALSE	TRUE	TRUE	FALSE	3	TRUE
chrI:1863364-1863766	TRUE	FALSE	TRUE	TRUE	TRUE	4	TRUE
chrI:1864269-1864596	TRUE	FALSE	FALSE	FALSE	FALSE	1	TRUE
chrI:1869676-1870203	TRUE	FALSE	FALSE	FALSE	FALSE	1	TRUE
chrI:1870434-1870747	TRUE	FALSE	FALSE	FALSE	FALSE	1	FALSE
chrI:1871184-1871689	TRUE	FALSE	FALSE	TRUE	FALSE	2	TRUE
chrI:1871909-1872825	TRUE	TRUE	TRUE	TRUE	TRUE	5	TRUE
chrI:1873266-1873473	TRUE	FALSE	FALSE	FALSE	FALSE	1	FALSE
chrI:1873614-1874171	TRUE	TRUE	TRUE	TRUE	TRUE	5	TRUE
chrI:1875440-1876100	TRUE	FALSE	FALSE	TRUE	FALSE	2	TRUE
chrI:1876457-1876752	FALSE	TRUE	FALSE	TRUE	FALSE	2	FALSE
chrI:1876875-1877635	TRUE	TRUE	TRUE	TRUE	TRUE	5	TRUE
chrI:1877885-1878774	TRUE	TRUE	TRUE	TRUE	TRUE	5	TRUE
chrI:1878853-1879374	TRUE	FALSE	FALSE	TRUE	FALSE	2	TRUE
chrI:1882334-1882647	TRUE	FALSE	FALSE	FALSE	FALSE	1	TRUE
chrI:1883738-1884098	FALSE	FALSE	TRUE	TRUE	TRUE	3	TRUE
chrI:1884207-1884488	FALSE	FALSE	FALSE	TRUE	FALSE	1	TRUE
chrI:1886837-1887177	FALSE	FALSE	TRUE	FALSE	FALSE	1	TRUE
chrI:1888566-1888895	TRUE	FALSE	TRUE	FALSE	FALSE	2	TRUE
chrI:1890290-1890611	FALSE	FALSE	TRUE	TRUE	TRUE	3	TRUE
chrI:1890910-1891267	FALSE	FALSE	TRUE	TRUE	FALSE	2	TRUE
chrI:1893078-1893714	FALSE	TRUE	TRUE	TRUE	FALSE	3	TRUE
chrI:1894441-1894887	FALSE	TRUE	TRUE	TRUE	TRUE	4	FALSE
chrI:1895148-1895296	FALSE	FALSE	TRUE	FALSE	FALSE	1	TRUE
chrI:1895754-1896375	TRUE	FALSE	TRUE	FALSE	TRUE	3	TRUE
chrI:1897472-1897803	TRUE	FALSE	FALSE	FALSE	FALSE	1	FALSE
chrI:1898467-1898736	TRUE	FALSE	FALSE	FALSE	FALSE	1	TRUE
chrI:1899658-1900215	TRUE	FALSE	TRUE	TRUE	TRUE	4	TRUE
chrI:1900518-1900888	FALSE	FALSE	TRUE	TRUE	TRUE	3	TRUE
chrI:1901291-1901909	TRUE	FALSE	TRUE	TRUE	FALSE	3	TRUE
chrI:1904059-1904420	FALSE	FALSE	TRUE	FALSE	FALSE	1	TRUE
chrI:1910833-1911265	TRUE	FALSE	TRUE	FALSE	TRUE	3	TRUE
chrI:1911821-1912798	TRUE	TRUE	TRUE	TRUE	TRUE	5	TRUE
chrI:1913419-1913883	TRUE	FALSE	FALSE	TRUE	FALSE	2	FALSE
chrI:1914186-1914917	TRUE	TRUE	TRUE	TRUE	TRUE	5	TRUE
chrI:1915264-1915831	TRUE	FALSE	TRUE	TRUE	FALSE	3	TRUE
chrI:1916170-1916444	FALSE	FALSE	TRUE	TRUE	FALSE	2	TRUE
chrI:1916497-1916975	TRUE	FALSE	TRUE	TRUE	TRUE	4	TRUE
chrI:1918946-1919375	TRUE	TRUE	FALSE	FALSE	FALSE	2	TRUE
chrI:1919770-1920374	FALSE	TRUE	TRUE	TRUE	FALSE	3	TRUE
chrI:1920582-1920865	FALSE	TRUE	TRUE	TRUE	FALSE	3	TRUE
chrI:1920927-1921399	TRUE	TRUE	TRUE	TRUE	TRUE	5	TRUE
chrI:1921590-1922069	FALSE	TRUE	TRUE	TRUE	TRUE	4	TRUE
chrI:1926515-1927231	FALSE	TRUE	TRUE	TRUE	TRUE	4	TRUE
chrI:1930740-1931064	FALSE	FALSE	TRUE	TRUE	TRUE	3	TRUE
chrI:1931382-1931684	FALSE	FALSE	TRUE	FALSE	FALSE	1	TRUE
chrI:1931984-1932259	FALSE	FALSE	TRUE	FALSE	FALSE	1	TRUE
chrI:1932547-1932916	FALSE	FALSE	TRUE	FALSE	FALSE	1	TRUE
chrI:1933806-1934136	TRUE	FALSE	TRUE	FALSE	FALSE	2	TRUE
chrI:1935234-1935617	FALSE	FALSE	TRUE	TRUE	FALSE	2	TRUE
chrI:1936624-1937037	TRUE	FALSE	TRUE	FALSE	FALSE	2	TRUE
chrI:1937273-1938213	TRUE	FALSE	TRUE	TRUE	FALSE	3	TRUE
chrI:1939235-1939611	FALSE	FALSE	TRUE	FALSE	FALSE	1	TRUE
chrI:1939902-1940215	TRUE	FALSE	FALSE	FALSE	FALSE	1	TRUE
chrI:1940713-1941016	TRUE	FALSE	FALSE	TRUE	FALSE	2	TRUE
chrI:1941251-1941589	FALSE	FALSE	FALSE	TRUE	FALSE	1	TRUE
chrI:1945219-1945512	TRUE	FALSE	TRUE	FALSE	FALSE	2	TRUE
chrI:1945799-1946102	FALSE	FALSE	TRUE	FALSE	FALSE	1	TRUE
chrI:1954235-1954574	TRUE	FALSE	TRUE	TRUE	FALSE	3	TRUE
chrI:1957162-1957516	FALSE	FALSE	TRUE	FALSE	FALSE	1	TRUE
chrI:1958356-1958756	TRUE	TRUE	TRUE	TRUE	TRUE	5	TRUE
chrI:1962650-1962961	FALSE	FALSE	TRUE	FALSE	FALSE	1	TRUE
chrI:1967191-1967635	FALSE	FALSE	FALSE	TRUE	FALSE	1	TRUE
chrI:1968136-1968414	TRUE	FALSE	FALSE	FALSE	FALSE	1	TRUE
chrI:1968561-1969087	FALSE	FALSE	TRUE	TRUE	TRUE	3	TRUE
chrI:1969491-1969845	FALSE	FALSE	TRUE	FALSE	TRUE	2	TRUE
chrI:1970204-1970547	FALSE	FALSE	TRUE	TRUE	TRUE	3	TRUE
chrI:1970849-1971097	FALSE	FALSE	FALSE	TRUE	FALSE	1	TRUE
chrI:1971410-1972281	TRUE	TRUE	TRUE	TRUE	TRUE	5	TRUE
chrI:1972660-1973000	FALSE	TRUE	TRUE	TRUE	FALSE	3	TRUE
chrI:1973203-1974141	FALSE	TRUE	TRUE	TRUE	TRUE	4	TRUE
chrI:1974494-1975091	TRUE	FALSE	FALSE	TRUE	FALSE	2	FALSE
chrI:1977744-1978136	TRUE	TRUE	TRUE	TRUE	TRUE	5	TRUE
chrI:1978191-1978458	TRUE	FALSE	FALSE	FALSE	FALSE	1	TRUE
chrI:1978490-1979177	TRUE	FALSE	TRUE	TRUE	TRUE	4	TRUE
chrI:1979451-1980078	TRUE	FALSE	FALSE	TRUE	FALSE	2	FALSE
chrI:1980426-1981655	TRUE	FALSE	FALSE	TRUE	TRUE	3	TRUE
chrI:1982071-1982527	TRUE	FALSE	FALSE	FALSE	FALSE	1	TRUE
chrI:1982681-1983021	FALSE	FALSE	FALSE	TRUE	FALSE	1	TRUE
chrI:1986090-1986476	FALSE	FALSE	TRUE	TRUE	FALSE	2	FALSE
chrI:1986902-1987154	TRUE	FALSE	FALSE	FALSE	FALSE	1	TRUE
chrI:1987419-1987773	TRUE	FALSE	TRUE	TRUE	TRUE	4	TRUE
chrI:1987902-1988184	FALSE	FALSE	TRUE	TRUE	FALSE	2	TRUE
chrI:1988440-1988714	FALSE	FALSE	TRUE	FALSE	FALSE	1	TRUE
chrI:1989063-1989478	TRUE	FALSE	TRUE	TRUE	FALSE	3	TRUE
chrI:1989728-1990016	TRUE	FALSE	FALSE	FALSE	FALSE	1	TRUE
chrI:1992637-1992897	TRUE	FALSE	FALSE	FALSE	FALSE	1	FALSE
chrI:1997701-1997999	FALSE	FALSE	FALSE	TRUE	FALSE	1	FALSE
chrI:1998156-1998626	FALSE	FALSE	FALSE	TRUE	TRUE	2	TRUE
chrI:1998878-1999269	FALSE	FALSE	FALSE	TRUE	FALSE	1	TRUE
chrI:2001070-2001596	TRUE	FALSE	TRUE	TRUE	FALSE	3	TRUE
chrI:2001649-2001915	TRUE	FALSE	FALSE	FALSE	FALSE	1	TRUE
chrI:2002187-2002950	FALSE	TRUE	TRUE	TRUE	TRUE	4	TRUE
chrI:2003297-2003615	FALSE	FALSE	TRUE	TRUE	TRUE	3	TRUE
chrI:2003816-2004253	TRUE	FALSE	TRUE	TRUE	TRUE	4	FALSE
chrI:2005066-2005535	TRUE	FALSE	TRUE	TRUE	TRUE	4	TRUE
chrI:2005920-2006318	FALSE	FALSE	TRUE	TRUE	TRUE	3	TRUE
chrI:2006773-2007169	FALSE	FALSE	TRUE	FALSE	FALSE	1	TRUE
chrI:2007570-2008132	TRUE	FALSE	TRUE	TRUE	FALSE	3	TRUE
chrI:2008253-2008455	FALSE	FALSE	TRUE	FALSE	TRUE	2	TRUE
chrI:2008747-2009124	TRUE	FALSE	TRUE	TRUE	TRUE	4	TRUE
chrI:2009398-2009905	TRUE	FALSE	TRUE	TRUE	FALSE	3	TRUE
chrI:2010399-2010768	TRUE	TRUE	TRUE	TRUE	TRUE	5	TRUE
chrI:2011148-2011526	FALSE	TRUE	TRUE	TRUE	TRUE	4	FALSE
chrI:2011634-2011995	TRUE	TRUE	TRUE	TRUE	TRUE	5	TRUE
chrI:2012286-2012596	FALSE	FALSE	TRUE	TRUE	TRUE	3	TRUE
chrI:2012874-2013227	TRUE	FALSE	TRUE	FALSE	FALSE	2	TRUE
chrI:2014192-2014512	FALSE	FALSE	TRUE	FALSE	FALSE	1	TRUE
chrI:2014838-2015185	TRUE	FALSE	TRUE	FALSE	FALSE	2	TRUE
chrI:2016796-2017058	FALSE	FALSE	TRUE	FALSE	FALSE	1	TRUE
chrI:2017283-2017558	FALSE	FALSE	TRUE	FALSE	FALSE	1	FALSE
chrI:2017846-2018089	FALSE	FALSE	TRUE	FALSE	FALSE	1	TRUE
chrI:2018595-2018965	FALSE	FALSE	TRUE	TRUE	TRUE	3	TRUE
chrI:2019092-2019479	TRUE	TRUE	TRUE	TRUE	TRUE	5	TRUE
chrI:2019736-2020160	TRUE	TRUE	TRUE	TRUE	TRUE	5	FALSE
chrI:2020377-2020575	TRUE	FALSE	FALSE	FALSE	FALSE	1	TRUE
chrI:2020791-2021470	TRUE	TRUE	TRUE	TRUE	TRUE	5	TRUE
chrI:2021743-2022271	TRUE	TRUE	TRUE	TRUE	TRUE	5	TRUE
chrI:2022469-2022808	TRUE	FALSE	TRUE	FALSE	TRUE	3	TRUE
chrI:2022810-2023174	FALSE	TRUE	TRUE	TRUE	TRUE	4	TRUE
chrI:2023633-2024026	TRUE	FALSE	TRUE	FALSE	FALSE	2	FALSE
chrI:2024085-2024601	TRUE	FALSE	TRUE	TRUE	TRUE	4	TRUE
chrI:2024652-2024966	FALSE	TRUE	FALSE	FALSE	FALSE	1	FALSE
chrI:2025149-2025619	TRUE	FALSE	TRUE	TRUE	FALSE	3	TRUE
chrI:2025814-2026109	TRUE	FALSE	TRUE	FALSE	FALSE	2	TRUE
chrI:2026308-2026495	TRUE	FALSE	FALSE	FALSE	FALSE	1	FALSE
chrI:2030515-2031291	TRUE	FALSE	TRUE	TRUE	TRUE	4	TRUE
chrI:2031500-2031702	FALSE	FALSE	TRUE	FALSE	FALSE	1	TRUE
chrI:2032122-2032533	TRUE	FALSE	TRUE	TRUE	TRUE	4	TRUE
chrI:2032654-2033046	TRUE	TRUE	TRUE	FALSE	FALSE	3	TRUE
chrI:2033676-2034404	TRUE	TRUE	TRUE	TRUE	TRUE	5	TRUE
chrI:2034892-2035502	TRUE	FALSE	TRUE	FALSE	TRUE	3	TRUE
chrI:2035749-2036037	FALSE	FALSE	FALSE	TRUE	FALSE	1	TRUE
chrI:2036210-2036815	TRUE	TRUE	TRUE	TRUE	TRUE	5	TRUE
chrI:2037296-2038361	TRUE	FALSE	FALSE	TRUE	FALSE	2	TRUE
chrI:2038639-2038999	FALSE	FALSE	FALSE	TRUE	FALSE	1	TRUE
chrI:2039166-2039465	TRUE	FALSE	TRUE	TRUE	FALSE	3	TRUE
chrI:2039695-2040439	TRUE	TRUE	TRUE	TRUE	TRUE	5	TRUE
chrI:2040442-2040687	FALSE	FALSE	FALSE	TRUE	FALSE	1	TRUE
chrI:2041016-2041524	TRUE	TRUE	TRUE	TRUE	TRUE	5	TRUE
chrI:2042945-2043474	TRUE	FALSE	TRUE	FALSE	TRUE	3	TRUE
chrI:2043775-2044083	FALSE	FALSE	FALSE	TRUE	FALSE	1	TRUE
chrI:2044224-2044713	TRUE	FALSE	TRUE	FALSE	FALSE	2	TRUE
chrI:2045027-2045467	TRUE	TRUE	TRUE	TRUE	TRUE	5	TRUE
chrI:2045750-2045989	TRUE	FALSE	FALSE	TRUE	FALSE	2	FALSE
chrI:2046237-2046990	TRUE	FALSE	FALSE	TRUE	FALSE	2	FALSE
chrI:2047051-2047434	TRUE	FALSE	FALSE	FALSE	FALSE	1	FALSE
chrI:2047495-2048193	TRUE	FALSE	FALSE	TRUE	FALSE	2	FALSE
chrI:2048517-2048913	TRUE	FALSE	FALSE	TRUE	FALSE	2	FALSE
chrI:2048977-2049473	TRUE	FALSE	TRUE	TRUE	TRUE	4	FALSE
chrI:2049695-2050317	TRUE	TRUE	TRUE	TRUE	TRUE	5	TRUE
chrI:2050506-2050857	TRUE	FALSE	FALSE	TRUE	FALSE	2	TRUE
chrI:2051747-2052064	TRUE	FALSE	FALSE	TRUE	FALSE	2	TRUE
chrI:2052531-2052771	FALSE	FALSE	FALSE	TRUE	FALSE	1	TRUE
chrI:2053040-2053388	TRUE	FALSE	FALSE	TRUE	FALSE	2	TRUE
chrI:2053466-2053999	TRUE	FALSE	FALSE	TRUE	FALSE	2	TRUE
chrI:2054604-2055532	TRUE	FALSE	TRUE	TRUE	TRUE	4	TRUE
chrI:2055865-2056288	TRUE	FALSE	FALSE	TRUE	FALSE	2	TRUE
chrI:2056518-2056901	TRUE	FALSE	FALSE	TRUE	FALSE	2	TRUE
chrI:2057199-2057492	FALSE	FALSE	FALSE	TRUE	FALSE	1	TRUE
chrI:2057681-2057916	TRUE	FALSE	FALSE	FALSE	FALSE	1	FALSE
chrI:2058136-2058651	TRUE	FALSE	FALSE	TRUE	FALSE	2	FALSE
chrI:2059182-2059487	TRUE	FALSE	FALSE	FALSE	FALSE	1	FALSE
chrI:2059530-2060627	TRUE	FALSE	FALSE	TRUE	TRUE	3	TRUE
chrI:2061204-2061580	TRUE	TRUE	TRUE	TRUE	TRUE	5	TRUE
chrI:2061866-2062294	FALSE	FALSE	TRUE	TRUE	FALSE	2	TRUE
chrI:2062454-2062875	TRUE	FALSE	TRUE	TRUE	TRUE	4	TRUE
chrI:2063970-2064187	FALSE	FALSE	TRUE	FALSE	FALSE	1	TRUE
chrI:2064782-2065097	FALSE	FALSE	FALSE	TRUE	FALSE	1	FALSE
chrI:2065500-2065842	FALSE	FALSE	FALSE	TRUE	FALSE	1	FALSE
chrI:2066074-2067033	TRUE	TRUE	TRUE	TRUE	TRUE	5	TRUE
chrI:2067651-2068135	FALSE	TRUE	TRUE	TRUE	TRUE	4	TRUE
chrI:2068513-2068804	FALSE	TRUE	FALSE	FALSE	FALSE	1	FALSE
chrI:2068886-2069694	TRUE	TRUE	TRUE	TRUE	TRUE	5	FALSE
chrI:2070038-2070576	FALSE	FALSE	FALSE	TRUE	FALSE	1	FALSE
chrI:2070709-2071131	TRUE	TRUE	TRUE	FALSE	TRUE	4	TRUE
chrI:2071286-2071687	TRUE	FALSE	FALSE	TRUE	FALSE	2	FALSE
chrI:2072663-2072960	FALSE	FALSE	FALSE	TRUE	FALSE	1	TRUE
chrI:2074121-2074848	TRUE	FALSE	TRUE	TRUE	FALSE	3	FALSE
chrI:2075017-2075281	TRUE	FALSE	FALSE	FALSE	FALSE	1	FALSE
chrI:2076311-2077138	TRUE	TRUE	TRUE	TRUE	TRUE	5	TRUE
chrI:2077422-2077983	TRUE	TRUE	TRUE	TRUE	TRUE	5	TRUE
chrI:2078449-2078763	FALSE	FALSE	TRUE	TRUE	TRUE	3	TRUE
chrI:2078976-2079324	TRUE	TRUE	TRUE	TRUE	TRUE	5	TRUE
chrI:2079488-2079731	TRUE	FALSE	FALSE	FALSE	FALSE	1	TRUE
chrI:2080029-2080830	TRUE	FALSE	FALSE	TRUE	TRUE	3	TRUE
chrI:2081064-2081446	FALSE	FALSE	FALSE	TRUE	FALSE	1	TRUE
chrI:2081552-2081913	TRUE	FALSE	FALSE	FALSE	FALSE	1	TRUE
chrI:2082005-2082413	FALSE	FALSE	TRUE	TRUE	TRUE	3	TRUE
chrI:2082636-2084378	TRUE	TRUE	TRUE	TRUE	TRUE	5	TRUE
chrI:2084670-2085370	TRUE	TRUE	TRUE	TRUE	TRUE	5	TRUE
chrI:2085684-2086182	TRUE	TRUE	TRUE	TRUE	TRUE	5	TRUE
chrI:2086443-2086962	FALSE	FALSE	TRUE	TRUE	FALSE	2	TRUE
chrI:2088000-2088269	FALSE	FALSE	TRUE	FALSE	FALSE	1	TRUE
chrI:2088681-2089051	FALSE	FALSE	TRUE	FALSE	FALSE	1	TRUE
chrI:2089400-2089696	FALSE	FALSE	TRUE	FALSE	FALSE	1	TRUE
chrI:2090827-2091087	FALSE	FALSE	TRUE	FALSE	FALSE	1	TRUE
chrI:2091415-2091871	FALSE	FALSE	TRUE	TRUE	FALSE	2	TRUE
chrI:2092425-2092749	FALSE	FALSE	TRUE	FALSE	FALSE	1	TRUE
chrI:2093166-2093628	FALSE	FALSE	TRUE	TRUE	FALSE	2	TRUE
chrI:2093969-2094184	FALSE	FALSE	TRUE	FALSE	FALSE	1	TRUE
chrI:2094381-2094968	FALSE	TRUE	TRUE	TRUE	TRUE	4	TRUE
chrI:2095352-2095645	FALSE	FALSE	TRUE	TRUE	FALSE	2	TRUE
chrI:2095832-2096691	TRUE	TRUE	TRUE	TRUE	TRUE	5	TRUE
chrI:2096982-2097269	FALSE	FALSE	TRUE	TRUE	TRUE	3	FALSE
chrI:2097947-2098257	TRUE	FALSE	FALSE	FALSE	FALSE	1	FALSE
chrI:2098919-2099593	TRUE	FALSE	FALSE	TRUE	FALSE	2	TRUE
chrI:2100007-2100584	TRUE	TRUE	TRUE	TRUE	TRUE	5	TRUE
chrI:2104234-2104589	FALSE	FALSE	FALSE	TRUE	FALSE	1	TRUE
chrI:2105537-2105883	TRUE	FALSE	FALSE	FALSE	FALSE	1	TRUE
chrI:2107485-2107759	FALSE	FALSE	FALSE	TRUE	FALSE	1	FALSE
chrI:2108068-2108361	FALSE	FALSE	FALSE	TRUE	FALSE	1	TRUE
chrI:2108587-2108970	TRUE	FALSE	TRUE	TRUE	FALSE	3	FALSE
chrI:2109194-2109505	FALSE	FALSE	FALSE	TRUE	FALSE	1	TRUE
chrI:2110726-2111531	TRUE	FALSE	TRUE	TRUE	FALSE	3	TRUE
chrI:2112611-2112866	TRUE	FALSE	FALSE	FALSE	FALSE	1	TRUE
chrI:2112925-2113540	TRUE	FALSE	TRUE	TRUE	TRUE	4	TRUE
chrI:2113807-2114123	FALSE	FALSE	FALSE	TRUE	FALSE	1	FALSE
chrI:2114166-2114723	TRUE	FALSE	FALSE	TRUE	FALSE	2	TRUE
chrI:2115122-2115695	FALSE	FALSE	FALSE	TRUE	TRUE	2	TRUE
chrI:2115740-2116448	TRUE	FALSE	FALSE	TRUE	FALSE	2	TRUE
chrI:2117252-2117813	TRUE	FALSE	TRUE	TRUE	TRUE	4	TRUE
chrI:2118026-2118566	TRUE	TRUE	FALSE	TRUE	FALSE	3	TRUE
chrI:2118815-2119146	TRUE	FALSE	FALSE	TRUE	FALSE	2	TRUE
chrI:2119433-2119979	TRUE	FALSE	TRUE	TRUE	TRUE	4	TRUE
chrI:2120676-2120895	FALSE	FALSE	FALSE	TRUE	FALSE	1	FALSE
chrI:2121101-2121462	TRUE	FALSE	TRUE	TRUE	TRUE	4	TRUE
chrI:2122039-2122357	FALSE	FALSE	FALSE	FALSE	TRUE	1	TRUE
chrI:2122518-2122838	FALSE	FALSE	FALSE	TRUE	TRUE	2	TRUE
chrI:2123546-2123934	TRUE	FALSE	FALSE	FALSE	FALSE	1	FALSE
chrI:2124189-2124583	TRUE	FALSE	TRUE	TRUE	FALSE	3	TRUE
chrI:2124610-2125706	TRUE	TRUE	TRUE	TRUE	TRUE	5	TRUE
chrI:2125914-2126141	TRUE	FALSE	FALSE	FALSE	FALSE	1	TRUE
chrI:2126317-2126592	TRUE	FALSE	FALSE	FALSE	FALSE	1	TRUE
chrI:2126727-2127419	TRUE	TRUE	TRUE	TRUE	TRUE	5	TRUE
chrI:2127552-2128114	TRUE	FALSE	FALSE	TRUE	TRUE	3	TRUE
chrI:2128299-2128707	TRUE	FALSE	FALSE	TRUE	FALSE	2	TRUE
chrI:2128903-2129239	FALSE	FALSE	TRUE	TRUE	TRUE	3	TRUE
chrI:2129480-2129731	FALSE	FALSE	TRUE	TRUE	FALSE	2	TRUE
chrI:2129936-2130235	TRUE	FALSE	TRUE	TRUE	FALSE	3	TRUE
chrI:2131030-2131344	FALSE	FALSE	FALSE	TRUE	FALSE	1	TRUE
chrI:2131707-2132118	TRUE	FALSE	FALSE	TRUE	FALSE	2	TRUE
chrI:2132961-2133598	TRUE	FALSE	FALSE	TRUE	FALSE	2	TRUE
chrI:2134213-2134548	FALSE	FALSE	FALSE	TRUE	FALSE	1	TRUE
chrI:2135264-2135704	TRUE	FALSE	FALSE	FALSE	FALSE	1	TRUE
chrI:2135963-2136318	TRUE	FALSE	FALSE	FALSE	FALSE	1	TRUE
chrI:2139337-2139691	FALSE	FALSE	FALSE	TRUE	FALSE	1	TRUE
chrI:2140284-2141105	TRUE	FALSE	FALSE	TRUE	TRUE	3	TRUE
chrI:2141754-2142128	FALSE	FALSE	TRUE	TRUE	FALSE	2	TRUE
chrI:2143255-2144246	TRUE	FALSE	TRUE	TRUE	TRUE	4	FALSE
chrI:2144308-2144777	TRUE	TRUE	TRUE	TRUE	TRUE	5	FALSE
chrI:2145283-2145682	TRUE	TRUE	TRUE	TRUE	TRUE	5	TRUE
chrI:2146641-2146899	FALSE	FALSE	TRUE	FALSE	TRUE	2	TRUE
chrI:2147170-2147543	FALSE	FALSE	FALSE	TRUE	FALSE	1	TRUE
chrI:2154237-2154657	TRUE	TRUE	TRUE	TRUE	FALSE	4	FALSE
chrI:2154976-2155371	TRUE	TRUE	TRUE	FALSE	TRUE	4	TRUE
chrI:2155426-2156625	TRUE	TRUE	TRUE	TRUE	TRUE	5	TRUE
chrI:2156965-2157893	TRUE	TRUE	FALSE	FALSE	FALSE	2	FALSE
chrI:2159703-2160160	FALSE	FALSE	TRUE	TRUE	FALSE	2	TRUE
chrI:2161546-2161985	FALSE	FALSE	TRUE	FALSE	FALSE	1	FALSE
chrI:2167942-2168458	TRUE	TRUE	TRUE	TRUE	FALSE	4	TRUE
chrI:2168593-2168950	TRUE	FALSE	FALSE	FALSE	FALSE	1	TRUE
chrI:2169636-2170002	TRUE	TRUE	FALSE	FALSE	FALSE	2	TRUE
chrI:2170265-2170709	TRUE	FALSE	TRUE	TRUE	TRUE	4	TRUE
chrI:2171047-2172105	TRUE	FALSE	TRUE	TRUE	TRUE	4	TRUE
chrI:2172578-2173631	TRUE	FALSE	FALSE	TRUE	FALSE	2	FALSE
chrI:2173712-2174079	FALSE	FALSE	FALSE	TRUE	FALSE	1	FALSE
chrI:2174546-2175068	TRUE	FALSE	FALSE	TRUE	FALSE	2	FALSE
chrI:2175325-2175595	FALSE	FALSE	FALSE	TRUE	FALSE	1	TRUE
chrI:2175778-2176330	FALSE	FALSE	FALSE	FALSE	TRUE	1	TRUE
chrI:2176611-2177129	FALSE	FALSE	FALSE	TRUE	FALSE	1	TRUE
chrI:2177448-2177975	TRUE	FALSE	FALSE	TRUE	FALSE	2	TRUE
chrI:2178019-2178412	FALSE	FALSE	FALSE	TRUE	FALSE	1	FALSE
chrI:2178454-2178905	TRUE	FALSE	FALSE	FALSE	FALSE	1	TRUE
chrI:2179303-2179626	FALSE	FALSE	FALSE	TRUE	FALSE	1	TRUE
chrI:2180011-2180361	FALSE	FALSE	FALSE	TRUE	FALSE	1	FALSE
chrI:2180716-2181205	TRUE	FALSE	FALSE	FALSE	FALSE	1	FALSE
chrI:2181604-2182030	TRUE	FALSE	FALSE	TRUE	FALSE	2	FALSE
chrI:2182662-2183194	TRUE	FALSE	FALSE	TRUE	FALSE	2	FALSE
chrI:2184030-2184436	TRUE	FALSE	FALSE	TRUE	FALSE	2	TRUE
chrI:2184663-2185169	FALSE	FALSE	FALSE	TRUE	FALSE	1	TRUE
chrI:2185596-2185953	FALSE	FALSE	FALSE	TRUE	FALSE	1	FALSE
chrI:2186555-2186876	FALSE	FALSE	FALSE	TRUE	FALSE	1	FALSE
chrI:2187725-2188086	TRUE	FALSE	FALSE	FALSE	FALSE	1	FALSE
chrI:2188154-2188418	FALSE	FALSE	FALSE	TRUE	FALSE	1	FALSE
chrI:2189455-2189749	FALSE	FALSE	FALSE	TRUE	FALSE	1	TRUE
chrI:2189765-2190090	TRUE	FALSE	FALSE	FALSE	FALSE	1	TRUE
chrI:2190353-2190970	TRUE	TRUE	TRUE	TRUE	FALSE	4	FALSE
chrI:2191348-2191869	FALSE	FALSE	FALSE	TRUE	FALSE	1	TRUE
chrI:2192123-2192808	FALSE	FALSE	FALSE	TRUE	TRUE	2	TRUE
chrI:2196332-2196666	FALSE	FALSE	FALSE	TRUE	FALSE	1	FALSE
chrI:2197640-2197926	FALSE	FALSE	FALSE	TRUE	FALSE	1	FALSE
chrI:2198223-2198718	TRUE	FALSE	FALSE	TRUE	FALSE	2	TRUE
chrI:2199189-2199794	FALSE	FALSE	FALSE	TRUE	FALSE	1	TRUE
chrI:2199936-2200234	FALSE	FALSE	FALSE	TRUE	FALSE	1	FALSE
chrI:2200742-2201161	FALSE	FALSE	TRUE	FALSE	FALSE	1	FALSE
chrI:2201856-2202423	FALSE	FALSE	TRUE	TRUE	FALSE	2	FALSE
chrI:2202831-2203221	FALSE	FALSE	FALSE	TRUE	FALSE	1	TRUE
chrI:2203402-2203904	FALSE	TRUE	TRUE	TRUE	TRUE	4	FALSE
chrI:2204757-2205362	FALSE	TRUE	TRUE	FALSE	FALSE	2	TRUE
chrI:2205466-2205814	FALSE	FALSE	TRUE	TRUE	TRUE	3	TRUE
chrI:2206010-2206374	FALSE	TRUE	TRUE	TRUE	TRUE	4	TRUE
chrI:2210477-2210862	FALSE	TRUE	TRUE	TRUE	FALSE	3	TRUE
chrI:2219019-2219348	FALSE	FALSE	TRUE	FALSE	FALSE	1	FALSE
chrI:2221082-2221400	FALSE	FALSE	TRUE	FALSE	FALSE	1	TRUE
chrI:2223454-2223782	FALSE	FALSE	TRUE	FALSE	FALSE	1	TRUE
chrI:2224347-2224740	FALSE	FALSE	TRUE	FALSE	FALSE	1	TRUE
chrI:2225050-2225647	FALSE	FALSE	TRUE	FALSE	FALSE	1	FALSE
chrI:2231608-2231851	FALSE	FALSE	FALSE	FALSE	TRUE	1	TRUE
chrI:2234382-2234731	FALSE	FALSE	TRUE	FALSE	FALSE	1	TRUE
chrI:2247392-2247672	FALSE	FALSE	TRUE	FALSE	FALSE	1	TRUE
chrI:2248003-2248401	FALSE	FALSE	TRUE	FALSE	FALSE	1	FALSE
chrI:2248853-2249087	FALSE	TRUE	TRUE	TRUE	FALSE	3	TRUE
chrI:2249365-2249713	FALSE	TRUE	TRUE	TRUE	TRUE	4	FALSE
chrI:2249761-2250192	TRUE	TRUE	TRUE	TRUE	TRUE	5	FALSE
chrI:2250945-2251300	FALSE	TRUE	TRUE	TRUE	TRUE	4	TRUE
chrI:2252261-2252528	FALSE	FALSE	TRUE	FALSE	FALSE	1	FALSE
chrI:2252612-2252885	FALSE	FALSE	TRUE	FALSE	FALSE	1	FALSE
chrI:2253196-2253787	TRUE	FALSE	TRUE	FALSE	FALSE	2	TRUE
chrI:2254167-2254536	FALSE	FALSE	TRUE	TRUE	FALSE	2	FALSE
chrI:2254958-2255378	FALSE	FALSE	TRUE	TRUE	TRUE	3	FALSE
chrI:2255393-2255899	TRUE	FALSE	TRUE	TRUE	FALSE	3	FALSE
chrI:2266112-2267019	FALSE	FALSE	TRUE	FALSE	FALSE	1	FALSE
chrI:2267744-2268055	FALSE	TRUE	TRUE	FALSE	FALSE	2	FALSE
chrI:2268255-2268928	TRUE	TRUE	TRUE	FALSE	FALSE	3	FALSE
chrI:2269566-2269986	FALSE	TRUE	TRUE	TRUE	FALSE	3	FALSE
chrI:2270608-2270953	FALSE	FALSE	TRUE	FALSE	FALSE	1	TRUE
chrI:2271263-2271606	FALSE	FALSE	TRUE	FALSE	FALSE	1	TRUE
chrI:2272297-2272766	FALSE	TRUE	TRUE	TRUE	TRUE	4	TRUE
chrI:2273108-2273498	TRUE	TRUE	TRUE	TRUE	TRUE	5	FALSE
chrI:2274040-2274348	FALSE	TRUE	TRUE	TRUE	FALSE	3	FALSE
chrI:2274521-2274810	FALSE	TRUE	TRUE	FALSE	FALSE	2	FALSE
chrI:2275197-2275560	FALSE	FALSE	TRUE	TRUE	FALSE	2	TRUE
chrI:2278956-2279257	TRUE	FALSE	TRUE	FALSE	FALSE	2	TRUE
chrI:2279538-2279889	FALSE	TRUE	TRUE	TRUE	TRUE	4	TRUE
chrI:2280013-2280439	TRUE	TRUE	TRUE	TRUE	TRUE	5	TRUE
chrI:2280467-2280765	FALSE	TRUE	FALSE	FALSE	FALSE	1	FALSE
chrI:2281184-2281416	TRUE	FALSE	FALSE	FALSE	FALSE	1	FALSE
chrI:2282023-2282927	TRUE	FALSE	TRUE	TRUE	FALSE	3	TRUE
chrI:2284126-2284495	TRUE	FALSE	FALSE	FALSE	FALSE	1	TRUE
chrI:2286408-2286769	TRUE	FALSE	FALSE	FALSE	FALSE	1	TRUE
chrI:2288939-2289226	FALSE	FALSE	TRUE	FALSE	FALSE	1	TRUE
chrI:2289603-2290037	TRUE	FALSE	FALSE	TRUE	FALSE	2	FALSE
chrI:2290158-2290500	FALSE	FALSE	FALSE	TRUE	FALSE	1	TRUE
chrI:2290604-2290932	TRUE	FALSE	FALSE	FALSE	FALSE	1	TRUE
chrI:2290988-2291389	TRUE	TRUE	TRUE	TRUE	TRUE	5	FALSE
chrI:2291585-2292602	TRUE	TRUE	TRUE	TRUE	FALSE	4	TRUE
chrI:2292738-2293662	TRUE	TRUE	TRUE	TRUE	TRUE	5	FALSE
chrI:2293909-2294270	TRUE	FALSE	FALSE	TRUE	FALSE	2	FALSE
chrI:2294462-2294915	TRUE	FALSE	FALSE	TRUE	FALSE	2	FALSE
chrI:2295035-2295613	TRUE	FALSE	TRUE	TRUE	TRUE	4	TRUE
chrI:2295952-2296577	TRUE	TRUE	TRUE	TRUE	TRUE	5	TRUE
chrI:2296721-2297091	TRUE	FALSE	FALSE	TRUE	FALSE	2	TRUE
chrI:2297352-2297795	TRUE	FALSE	TRUE	TRUE	FALSE	3	FALSE
chrI:2298001-2298358	TRUE	FALSE	FALSE	TRUE	FALSE	2	TRUE
chrI:2298617-2298793	FALSE	FALSE	FALSE	TRUE	FALSE	1	TRUE
chrI:2298965-2299287	TRUE	FALSE	FALSE	FALSE	FALSE	1	TRUE
chrI:2299433-2299817	FALSE	TRUE	TRUE	TRUE	TRUE	4	FALSE
chrI:2300072-2300454	TRUE	TRUE	TRUE	TRUE	TRUE	5	TRUE
chrI:2300795-2301196	TRUE	FALSE	FALSE	TRUE	FALSE	2	FALSE
chrI:2301376-2302220	TRUE	FALSE	FALSE	TRUE	FALSE	2	FALSE
chrI:2302337-2302644	TRUE	FALSE	FALSE	TRUE	FALSE	2	FALSE
chrI:2302872-2303104	FALSE	FALSE	FALSE	TRUE	FALSE	1	FALSE
chrI:2304093-2304436	FALSE	FALSE	FALSE	TRUE	FALSE	1	FALSE
chrI:2306704-2307068	FALSE	TRUE	TRUE	TRUE	TRUE	4	FALSE
chrI:2309172-2309542	FALSE	FALSE	TRUE	FALSE	FALSE	1	TRUE
chrI:2311330-2311961	TRUE	TRUE	TRUE	TRUE	TRUE	5	TRUE
chrI:2312275-2312631	FALSE	TRUE	FALSE	FALSE	FALSE	1	FALSE
chrI:2312948-2313258	FALSE	TRUE	FALSE	FALSE	FALSE	1	TRUE
chrI:2314155-2314695	TRUE	FALSE	FALSE	TRUE	FALSE	2	FALSE
chrI:2315939-2316680	TRUE	FALSE	TRUE	TRUE	TRUE	4	TRUE
chrI:2318128-2318450	TRUE	FALSE	FALSE	FALSE	TRUE	2	FALSE
chrI:2318671-2319079	TRUE	TRUE	TRUE	TRUE	TRUE	5	FALSE
chrI:2321728-2322167	TRUE	TRUE	TRUE	TRUE	TRUE	5	FALSE
chrI:2322684-2323363	TRUE	TRUE	TRUE	TRUE	TRUE	5	TRUE
chrI:2323543-2323726	FALSE	FALSE	TRUE	FALSE	FALSE	1	TRUE
chrI:2324432-2324666	FALSE	FALSE	TRUE	FALSE	FALSE	1	FALSE
chrI:2324895-2325219	FALSE	FALSE	TRUE	FALSE	FALSE	1	TRUE
chrI:2328154-2328573	FALSE	FALSE	TRUE	FALSE	FALSE	1	TRUE
chrI:2329319-2329914	FALSE	FALSE	TRUE	FALSE	FALSE	1	FALSE
chrI:2330199-2330495	FALSE	FALSE	TRUE	TRUE	TRUE	3	TRUE
chrI:2330693-2330933	FALSE	FALSE	TRUE	FALSE	FALSE	1	FALSE
chrI:2331829-2332341	FALSE	FALSE	TRUE	FALSE	FALSE	1	FALSE
chrI:2332807-2333224	FALSE	TRUE	TRUE	TRUE	FALSE	3	TRUE
chrI:2333231-2333513	FALSE	TRUE	FALSE	TRUE	FALSE	2	FALSE
chrI:2333834-2334064	FALSE	FALSE	TRUE	TRUE	FALSE	2	FALSE
chrI:2334498-2335283	TRUE	TRUE	TRUE	TRUE	TRUE	5	FALSE
chrI:2335358-2335771	FALSE	TRUE	TRUE	TRUE	FALSE	3	FALSE
chrI:2336273-2336737	FALSE	TRUE	TRUE	FALSE	FALSE	2	FALSE
chrI:2337109-2337681	FALSE	TRUE	TRUE	TRUE	FALSE	3	FALSE
chrI:2337934-2338468	FALSE	TRUE	TRUE	TRUE	TRUE	4	TRUE
chrI:2338723-2338937	FALSE	FALSE	TRUE	FALSE	FALSE	1	TRUE
chrI:2339131-2339383	FALSE	FALSE	TRUE	FALSE	FALSE	1	FALSE
chrI:2339762-2340350	FALSE	TRUE	TRUE	TRUE	TRUE	4	TRUE
chrI:2342958-2343326	FALSE	FALSE	TRUE	FALSE	FALSE	1	TRUE
chrI:2354889-2355280	FALSE	FALSE	TRUE	FALSE	FALSE	1	FALSE
chrI:2358413-2358677	FALSE	FALSE	TRUE	FALSE	FALSE	1	FALSE
chrI:2359338-2359744	FALSE	FALSE	TRUE	FALSE	FALSE	1	FALSE
chrI:2360139-2360569	TRUE	FALSE	TRUE	FALSE	FALSE	2	TRUE
chrI:2360882-2361406	FALSE	FALSE	TRUE	FALSE	FALSE	1	TRUE
chrI:2362446-2362720	FALSE	FALSE	TRUE	FALSE	FALSE	1	FALSE
chrI:2363110-2363346	FALSE	FALSE	TRUE	FALSE	FALSE	1	FALSE
chrI:2363507-2364741	FALSE	TRUE	TRUE	TRUE	TRUE	4	TRUE
chrI:2365037-2365291	FALSE	FALSE	TRUE	FALSE	FALSE	1	FALSE
chrI:2369595-2369882	FALSE	FALSE	TRUE	FALSE	FALSE	1	FALSE
chrI:2370234-2370654	FALSE	TRUE	TRUE	FALSE	FALSE	2	FALSE
chrI:2373718-2374313	TRUE	FALSE	TRUE	TRUE	TRUE	4	TRUE
chrI:2374699-2375023	FALSE	FALSE	FALSE	TRUE	FALSE	1	FALSE
chrI:2375340-2376479	TRUE	FALSE	TRUE	TRUE	TRUE	4	TRUE
chrI:2376723-2377294	FALSE	FALSE	TRUE	TRUE	FALSE	2	TRUE
chrI:2377920-2378406	TRUE	FALSE	TRUE	TRUE	FALSE	3	TRUE
chrI:2378681-2378972	TRUE	FALSE	FALSE	FALSE	FALSE	1	FALSE
chrI:2379297-2379738	FALSE	TRUE	TRUE	TRUE	FALSE	3	FALSE
chrI:2380513-2380953	TRUE	TRUE	TRUE	TRUE	TRUE	5	FALSE
chrI:2381551-2381784	FALSE	TRUE	FALSE	FALSE	FALSE	1	FALSE
chrI:2382983-2383339	TRUE	FALSE	TRUE	TRUE	TRUE	4	TRUE
chrI:2383550-2384178	FALSE	FALSE	TRUE	TRUE	TRUE	3	TRUE
chrI:2384982-2385461	TRUE	TRUE	TRUE	TRUE	TRUE	5	TRUE
chrI:2385642-2386176	TRUE	FALSE	TRUE	TRUE	FALSE	3	TRUE
chrI:2386612-2386943	FALSE	FALSE	TRUE	TRUE	TRUE	3	TRUE
chrI:2387204-2387636	TRUE	FALSE	TRUE	TRUE	TRUE	4	TRUE
chrI:2387781-2388112	TRUE	FALSE	FALSE	FALSE	FALSE	1	FALSE
chrI:2389776-2390657	TRUE	FALSE	TRUE	FALSE	TRUE	3	TRUE
chrI:2391252-2391649	FALSE	FALSE	TRUE	FALSE	FALSE	1	TRUE
chrI:2392891-2393892	TRUE	TRUE	TRUE	TRUE	TRUE	5	TRUE
chrI:2394602-2395040	TRUE	FALSE	FALSE	TRUE	FALSE	2	TRUE
chrI:2395147-2395450	TRUE	FALSE	FALSE	FALSE	FALSE	1	TRUE
chrI:2401460-2401858	TRUE	TRUE	TRUE	TRUE	TRUE	5	FALSE
chrI:2402215-2402565	FALSE	FALSE	FALSE	TRUE	FALSE	1	TRUE
chrI:2403509-2404141	TRUE	FALSE	TRUE	TRUE	FALSE	3	TRUE
chrI:2404223-2404647	TRUE	FALSE	TRUE	FALSE	TRUE	3	TRUE
chrI:2404889-2405250	FALSE	TRUE	TRUE	TRUE	TRUE	4	TRUE
chrI:2405317-2405784	TRUE	TRUE	TRUE	TRUE	FALSE	4	TRUE
chrI:2406533-2407686	TRUE	FALSE	TRUE	TRUE	TRUE	4	TRUE
chrI:2408015-2408295	FALSE	FALSE	TRUE	FALSE	FALSE	1	TRUE
chrI:2408677-2409128	FALSE	FALSE	TRUE	TRUE	TRUE	3	TRUE
chrI:2409956-2410286	FALSE	TRUE	TRUE	TRUE	TRUE	4	TRUE
chrI:2410533-2410850	FALSE	FALSE	TRUE	TRUE	TRUE	3	TRUE
chrI:2411453-2412058	TRUE	TRUE	TRUE	TRUE	TRUE	5	TRUE
chrI:2413190-2413466	FALSE	FALSE	TRUE	FALSE	FALSE	1	TRUE
chrI:2413742-2414120	TRUE	FALSE	TRUE	FALSE	FALSE	2	TRUE
chrI:2414244-2414715	FALSE	TRUE	TRUE	TRUE	FALSE	3	FALSE
chrI:2415331-2415647	FALSE	FALSE	TRUE	FALSE	FALSE	1	TRUE
chrI:2415925-2416493	TRUE	FALSE	TRUE	TRUE	TRUE	4	TRUE
chrI:2416840-2417093	FALSE	FALSE	TRUE	FALSE	FALSE	1	FALSE
chrI:2417655-2418415	TRUE	TRUE	TRUE	TRUE	TRUE	5	TRUE
chrI:2418722-2419504	TRUE	TRUE	TRUE	TRUE	TRUE	5	TRUE
chrI:2419911-2420434	TRUE	FALSE	FALSE	TRUE	FALSE	2	TRUE
chrI:2420516-2420794	FALSE	TRUE	FALSE	FALSE	FALSE	1	FALSE
chrI:2420991-2421273	FALSE	TRUE	FALSE	FALSE	FALSE	1	FALSE
chrI:2421529-2422567	TRUE	TRUE	TRUE	TRUE	FALSE	4	TRUE
chrI:2423369-2423914	FALSE	FALSE	TRUE	TRUE	TRUE	3	TRUE
chrI:2424300-2424765	FALSE	FALSE	TRUE	FALSE	FALSE	1	TRUE
chrI:2427780-2428150	FALSE	FALSE	TRUE	TRUE	TRUE	3	TRUE
chrI:2431726-2432103	FALSE	FALSE	TRUE	FALSE	FALSE	1	FALSE
chrI:2432166-2432504	TRUE	FALSE	TRUE	FALSE	TRUE	3	TRUE
chrI:2433508-2433858	FALSE	TRUE	TRUE	FALSE	FALSE	2	TRUE
chrI:2435736-2436381	TRUE	TRUE	TRUE	TRUE	TRUE	5	TRUE
chrI:2452668-2452989	FALSE	FALSE	TRUE	FALSE	FALSE	1	TRUE
chrI:2453409-2453659	FALSE	FALSE	TRUE	FALSE	FALSE	1	TRUE
chrI:2453908-2454286	FALSE	FALSE	TRUE	FALSE	FALSE	1	TRUE
chrI:2454892-2455158	FALSE	FALSE	TRUE	FALSE	FALSE	1	TRUE
chrI:2455357-2455616	FALSE	FALSE	TRUE	FALSE	FALSE	1	TRUE
chrI:2456576-2456947	FALSE	FALSE	TRUE	TRUE	FALSE	2	FALSE
chrI:2457029-2457351	FALSE	FALSE	TRUE	FALSE	TRUE	2	TRUE
chrI:2462887-2463211	FALSE	FALSE	TRUE	FALSE	FALSE	1	TRUE
chrI:2463561-2463913	FALSE	FALSE	TRUE	FALSE	FALSE	1	TRUE
chrI:2464161-2464502	FALSE	FALSE	TRUE	FALSE	TRUE	2	TRUE
chrI:2465525-2465918	FALSE	FALSE	TRUE	FALSE	FALSE	1	TRUE
chrI:2474201-2474527	TRUE	FALSE	FALSE	FALSE	FALSE	1	TRUE
chrI:2477752-2478196	TRUE	FALSE	TRUE	TRUE	FALSE	3	TRUE
chrI:2478567-2479070	FALSE	FALSE	TRUE	TRUE	FALSE	2	TRUE
chrI:2482809-2483082	FALSE	FALSE	FALSE	TRUE	FALSE	1	FALSE
chrI:2483182-2483539	FALSE	FALSE	FALSE	TRUE	FALSE	1	FALSE
chrI:2485484-2485827	TRUE	FALSE	TRUE	TRUE	TRUE	4	TRUE
chrI:2486117-2486884	TRUE	FALSE	TRUE	TRUE	TRUE	4	TRUE
chrI:2487299-2487775	TRUE	FALSE	FALSE	TRUE	FALSE	2	TRUE
chrI:2487786-2488125	FALSE	TRUE	TRUE	TRUE	FALSE	3	TRUE
chrI:2488474-2489046	TRUE	FALSE	TRUE	FALSE	FALSE	2	TRUE
chrI:2489176-2489484	FALSE	FALSE	TRUE	FALSE	FALSE	1	TRUE
chrI:2489787-2490119	TRUE	TRUE	TRUE	TRUE	TRUE	5	TRUE
chrI:2491107-2491512	TRUE	FALSE	FALSE	FALSE	FALSE	1	TRUE
chrI:2493349-2494228	TRUE	FALSE	TRUE	TRUE	TRUE	4	TRUE
chrI:2495380-2495763	TRUE	TRUE	TRUE	TRUE	TRUE	5	TRUE
chrI:2496269-2496714	TRUE	TRUE	TRUE	TRUE	TRUE	5	FALSE
chrI:2496974-2497200	FALSE	TRUE	FALSE	FALSE	FALSE	1	FALSE
chrI:2502612-2502932	FALSE	FALSE	TRUE	FALSE	TRUE	2	TRUE
chrI:2504785-2505368	TRUE	FALSE	FALSE	FALSE	FALSE	1	FALSE
chrI:2506116-2506549	TRUE	FALSE	FALSE	TRUE	FALSE	2	FALSE
chrI:2506717-2507092	TRUE	FALSE	TRUE	TRUE	TRUE	4	TRUE
chrI:2508450-2509149	FALSE	FALSE	TRUE	TRUE	FALSE	2	TRUE
chrI:2509884-2510134	FALSE	FALSE	TRUE	FALSE	FALSE	1	FALSE
chrI:2514098-2514487	FALSE	TRUE	TRUE	TRUE	TRUE	4	FALSE
chrI:2514777-2515114	FALSE	TRUE	TRUE	TRUE	TRUE	4	TRUE
chrI:2515494-2515772	FALSE	FALSE	TRUE	TRUE	FALSE	2	TRUE
chrI:2515939-2516228	FALSE	FALSE	TRUE	TRUE	FALSE	2	FALSE
chrI:2518001-2518342	FALSE	FALSE	TRUE	FALSE	FALSE	1	FALSE
chrI:2519735-2520362	FALSE	FALSE	TRUE	TRUE	FALSE	2	TRUE
chrI:2521481-2521753	FALSE	FALSE	TRUE	FALSE	FALSE	1	TRUE
chrI:2522392-2523016	FALSE	FALSE	TRUE	FALSE	FALSE	1	TRUE
chrI:2524697-2525079	FALSE	FALSE	TRUE	TRUE	FALSE	2	FALSE
chrI:2525443-2525888	FALSE	FALSE	TRUE	TRUE	FALSE	2	FALSE
chrI:2526204-2526500	FALSE	FALSE	TRUE	FALSE	FALSE	1	TRUE
chrI:2526691-2527070	TRUE	FALSE	TRUE	FALSE	FALSE	2	TRUE
chrI:2527478-2527773	FALSE	FALSE	TRUE	FALSE	FALSE	1	TRUE
chrI:2528764-2529028	FALSE	FALSE	TRUE	FALSE	FALSE	1	TRUE
chrI:2530814-2531162	FALSE	FALSE	TRUE	FALSE	FALSE	1	FALSE
chrI:2531596-2531922	FALSE	FALSE	TRUE	FALSE	FALSE	1	FALSE
chrI:2532278-2532767	FALSE	FALSE	TRUE	TRUE	TRUE	3	FALSE
chrI:2534641-2534905	FALSE	FALSE	TRUE	FALSE	FALSE	1	FALSE
chrI:2535224-2535612	FALSE	FALSE	TRUE	FALSE	FALSE	1	FALSE
chrI:2538391-2538791	TRUE	TRUE	TRUE	TRUE	TRUE	5	FALSE
chrI:2539378-2539922	FALSE	FALSE	TRUE	FALSE	FALSE	1	FALSE
chrI:2554083-2554552	TRUE	FALSE	TRUE	TRUE	TRUE	4	TRUE
chrI:2572083-2572338	FALSE	FALSE	TRUE	FALSE	FALSE	1	FALSE
chrI:2577176-2577881	TRUE	TRUE	TRUE	TRUE	FALSE	4	FALSE
chrI:2578322-2578905	FALSE	FALSE	TRUE	TRUE	TRUE	3	TRUE
chrI:2579060-2579407	TRUE	FALSE	TRUE	FALSE	TRUE	3	FALSE
chrI:2579661-2580370	TRUE	TRUE	TRUE	FALSE	FALSE	3	TRUE
chrI:2580524-2581020	TRUE	TRUE	TRUE	TRUE	TRUE	5	TRUE
chrI:2581385-2581692	TRUE	FALSE	FALSE	FALSE	FALSE	1	TRUE
chrI:2581983-2582944	TRUE	FALSE	FALSE	TRUE	TRUE	3	TRUE
chrI:2582957-2583265	TRUE	FALSE	FALSE	FALSE	FALSE	1	FALSE
chrI:2583609-2583945	TRUE	FALSE	FALSE	FALSE	FALSE	1	FALSE
chrI:2583948-2584359	FALSE	TRUE	FALSE	FALSE	FALSE	1	FALSE
chrI:2584399-2584860	FALSE	FALSE	FALSE	TRUE	TRUE	2	TRUE
chrI:2584967-2585456	TRUE	FALSE	TRUE	TRUE	TRUE	4	TRUE
chrI:2585523-2586193	TRUE	TRUE	TRUE	TRUE	TRUE	5	TRUE
chrI:2586215-2587213	TRUE	TRUE	TRUE	TRUE	TRUE	5	TRUE
chrI:2587376-2587694	FALSE	TRUE	FALSE	FALSE	TRUE	2	FALSE
chrI:2587802-2588275	TRUE	FALSE	TRUE	TRUE	TRUE	4	TRUE
chrI:2588540-2589007	TRUE	TRUE	TRUE	TRUE	TRUE	5	TRUE
chrI:2589740-2590030	FALSE	FALSE	TRUE	FALSE	FALSE	1	FALSE
chrI:2590207-2590536	FALSE	FALSE	TRUE	FALSE	FALSE	1	FALSE
chrI:2591200-2591641	TRUE	TRUE	TRUE	TRUE	TRUE	5	TRUE
chrI:2595465-2595790	FALSE	FALSE	TRUE	FALSE	FALSE	1	FALSE
chrI:2598603-2599223	TRUE	TRUE	TRUE	TRUE	TRUE	5	TRUE
chrI:2599427-2599730	FALSE	TRUE	TRUE	FALSE	FALSE	2	FALSE
chrI:2600323-2600965	FALSE	FALSE	TRUE	FALSE	FALSE	1	TRUE
chrI:2602190-2602554	FALSE	FALSE	TRUE	FALSE	FALSE	1	TRUE
chrI:2603525-2603875	FALSE	TRUE	FALSE	FALSE	FALSE	1	TRUE
chrI:2604161-2604629	TRUE	TRUE	TRUE	TRUE	TRUE	5	FALSE
chrI:2605055-2605692	FALSE	TRUE	TRUE	TRUE	TRUE	4	TRUE
chrI:2613473-2613936	FALSE	FALSE	TRUE	FALSE	FALSE	1	FALSE
chrI:2614515-2614875	FALSE	FALSE	TRUE	FALSE	FALSE	1	FALSE
chrI:2616272-2616630	FALSE	FALSE	TRUE	FALSE	FALSE	1	TRUE
chrI:2616782-2617190	FALSE	TRUE	TRUE	TRUE	FALSE	3	TRUE
chrI:2617987-2618455	TRUE	TRUE	TRUE	TRUE	TRUE	5	TRUE
chrI:2619483-2619786	FALSE	FALSE	TRUE	FALSE	FALSE	1	TRUE
chrI:2619850-2620092	FALSE	FALSE	FALSE	FALSE	TRUE	1	TRUE
chrI:2620342-2620701	FALSE	TRUE	TRUE	TRUE	TRUE	4	FALSE
chrI:2621887-2622156	FALSE	FALSE	TRUE	FALSE	FALSE	1	TRUE
chrI:2622841-2623200	FALSE	FALSE	FALSE	TRUE	TRUE	2	TRUE
chrI:2626128-2626502	TRUE	FALSE	FALSE	FALSE	FALSE	1	TRUE
chrI:2626935-2628031	TRUE	FALSE	TRUE	TRUE	TRUE	4	TRUE
chrI:2628092-2628643	TRUE	TRUE	FALSE	TRUE	TRUE	4	FALSE
chrI:2628662-2629494	TRUE	TRUE	FALSE	TRUE	FALSE	3	FALSE
chrI:2629727-2630120	FALSE	FALSE	FALSE	TRUE	FALSE	1	FALSE
chrI:2630400-2630692	FALSE	FALSE	FALSE	TRUE	FALSE	1	FALSE
chrI:2630718-2630924	TRUE	FALSE	FALSE	FALSE	FALSE	1	FALSE
chrI:2631013-2631305	FALSE	FALSE	FALSE	TRUE	FALSE	1	FALSE
[truncated: 31,302 more rows]

## Sheet: HPL-2 IDR peaks
chromosome	start	end
chrI	1	466
chrI	1838	2373
chrI	3326	4778
chrI	9143	9474
chrI	10057	11963
chrI	12221	16632
chrI	16843	17350
chrI	22202	22519
chrI	24406	24679
chrI	27077	27279
chrI	33663	34452
chrI	34657	35194
chrI	40240	41365
chrI	43012	43564
chrI	46467	47230
chrI	52096	52330
chrI	52459	52700
chrI	65075	65328
chrI	65460	68209
chrI	69891	70371
chrI	85772	86880
chrI	87563	88295
chrI	91054	91911
chrI	92124	93926
chrI	94881	95361
chrI	96045	96676
chrI	108065	109490
chrI	109564	111746
chrI	111855	112832
chrI	113258	113690
chrI	114536	115499
chrI	128171	129372
chrI	129809	131752
chrI	134856	135260
chrI	136662	137072
chrI	168011	168309
chrI	171939	172335
chrI	179005	180408
chrI	182859	183537
chrI	186383	188776
chrI	211059	211660
chrI	214403	216392
chrI	216448	217628
chrI	217722	218269
chrI	218650	221109
chrI	222553	223362
chrI	226423	227027
chrI	227152	227507
chrI	228988	230123
chrI	231721	232240
chrI	232336	233046
chrI	233824	236872
chrI	237451	238793
chrI	238923	239163
chrI	247534	250152
chrI	250374	252822
chrI	254667	255550
chrI	279606	282322
chrI	285121	285465
chrI	304134	304453
chrI	309632	310156
chrI	310434	311086
chrI	314562	316428
chrI	318108	318623
chrI	323264	323764
chrI	332551	334127
chrI	334580	336684
chrI	336998	338144
chrI	338335	343136
chrI	347143	347909
chrI	353279	353609
chrI	354252	357061
chrI	358743	359101
chrI	364005	365247
chrI	366188	366534
chrI	367831	368722
chrI	377440	379551
chrI	381189	383011
chrI	385522	385716
chrI	388887	389337
chrI	393744	394269
chrI	395188	395549
chrI	396825	397189
chrI	397404	398125
chrI	398440	398649
chrI	413026	413424
chrI	432093	432384
chrI	443513	443921
chrI	461589	461840
chrI	462721	464381
chrI	464520	465153
chrI	465388	465691
chrI	466861	467109
chrI	487036	487805
chrI	488319	488598
chrI	489238	491489
chrI	493891	494205
chrI	494593	495695
chrI	497290	497563
chrI	500336	500565
chrI	500674	501496
chrI	501886	502973
chrI	504509	504901
chrI	505971	506982
chrI	509349	510243
chrI	510334	512113
chrI	512252	520161
chrI	520293	521054
chrI	533289	533880
chrI	534226	534452
chrI	535310	535678
chrI	535747	537547
chrI	538341	538977
chrI	542210	543398
chrI	543496	543899
chrI	545085	545718
chrI	547648	548218
chrI	548425	548892
chrI	549524	550313
chrI	551051	551338
chrI	557704	558260
chrI	560953	561306
chrI	564177	564532
chrI	596711	597318
chrI	606851	607363
chrI	609473	610025
chrI	614234	614661
chrI	616024	616524
chrI	624198	626870
chrI	626934	630653
chrI	630757	631430
chrI	636642	637123
chrI	637435	638197
chrI	639853	640177
chrI	640922	641263
chrI	645645	646823
chrI	647280	648227
chrI	648364	651921
chrI	652269	653327
chrI	659645	660044
chrI	662145	662441
chrI	663085	664238
chrI	665369	665814
chrI	666238	666556
chrI	669015	669258
chrI	669562	670344
chrI	670496	671807
chrI	677628	677862
chrI	680438	681139
chrI	689380	690093
chrI	691337	691966
chrI	692213	700861
chrI	700990	701356
chrI	701700	702439
chrI	711027	711755
chrI	713573	715121
chrI	716532	718823
chrI	718897	720796
chrI	720860	721405
chrI	721629	722035
chrI	724684	725325
chrI	725645	726248
chrI	731190	731481
chrI	736750	737577
chrI	737848	738189
chrI	738373	738678
chrI	749197	749910
chrI	753897	754848
chrI	759945	760348
chrI	761495	761884
chrI	762298	763286
chrI	766945	767617
chrI	769025	770337
chrI	776652	777319
chrI	777554	778468
chrI	779087	779371
chrI	780491	781217
chrI	781531	782502
chrI	784526	784803
chrI	788507	788962
chrI	803691	804129
chrI	807019	807579
chrI	824971	826500
chrI	833404	833880
chrI	835215	835564
chrI	836585	837342
chrI	843129	843742
chrI	844340	845080
chrI	846130	846401
chrI	847952	849147
chrI	852000	852543
chrI	852620	852891
chrI	853211	853469
chrI	871734	872137
chrI	872744	874687
chrI	876632	878263
chrI	882385	884455
chrI	885327	885581
chrI	887335	888248
chrI	888325	889785
chrI	890602	891075
chrI	891178	891419
chrI	891633	892155
chrI	901708	902039
chrI	904732	905079
chrI	905406	906040
chrI	906949	907342
chrI	907553	908509
chrI	908831	909264
chrI	909794	910069
chrI	912981	913841
chrI	915108	915383
chrI	915485	915746
chrI	916648	917297
chrI	933405	934797
chrI	937009	937302
chrI	946711	947048
chrI	948154	948536
chrI	949502	950375
chrI	967278	967542
chrI	973054	973653
chrI	980838	981530
chrI	983614	984073
chrI	991840	992196
chrI	1002039	1002232
chrI	1006163	1006886
chrI	1007614	1007901
chrI	1008684	1009367
chrI	1010641	1011402
chrI	1011897	1012228
chrI	1014303	1019157
chrI	1019216	1019691
chrI	1020092	1020332
chrI	1030688	1031449
chrI	1033417	1034836
chrI	1040978	1041291
chrI	1045748	1045971
chrI	1048714	1049372
chrI	1049601	1054169
chrI	1056486	1056859
chrI	1057956	1058362
chrI	1058512	1059027
chrI	1059660	1059948
chrI	1060009	1060779
chrI	1060924	1063043
chrI	1064760	1065808
chrI	1066626	1067311
chrI	1067579	1070247
chrI	1073449	1074252
chrI	1074846	1075764
chrI	1076385	1076866
chrI	1078615	1082126
chrI	1082370	1082718
chrI	1086170	1086522
chrI	1086925	1087241
chrI	1089132	1089688
chrI	1100158	1100429
chrI	1110187	1110529
chrI	1116804	1118261
chrI	1120878	1124853
chrI	1133664	1133978
chrI	1136021	1136397
chrI	1139835	1140344
chrI	1142592	1142840
chrI	1151191	1151487
chrI	1153845	1154412
chrI	1154502	1155553
chrI	1156435	1158147
chrI	1158244	1158804
chrI	1158945	1162863
chrI	1162935	1164087
chrI	1167882	1168662
chrI	1171003	1171528
chrI	1174441	1175163
chrI	1179579	1179986
chrI	1184516	1184822
chrI	1199236	1199713
chrI	1211001	1211356
chrI	1212867	1214417
chrI	1217740	1219723
chrI	1221919	1222342
chrI	1223574	1230996
chrI	1231158	1231737
chrI	1241289	1242073
chrI	1251406	1251928
chrI	1254984	1255297
chrI	1255690	1255917
chrI	1263397	1263673
chrI	1263753	1264682
chrI	1264812	1265962
chrI	1266040	1266349
chrI	1266830	1267238
chrI	1268209	1268578
chrI	1269360	1269620
chrI	1276709	1277115
chrI	1278496	1279258
chrI	1279853	1280424
chrI	1283131	1283377
chrI	1284043	1284748
chrI	1285574	1287243
chrI	1292383	1292596
chrI	1293631	1294193
chrI	1296061	1296793
chrI	1301118	1301602
chrI	1303491	1303823
chrI	1305040	1305350
chrI	1305655	1306067
chrI	1306125	1306390
chrI	1312322	1313868
chrI	1314356	1314668
chrI	1320631	1321401
chrI	1321499	1321835
chrI	1325084	1325259
chrI	1327932	1328585
chrI	1334089	1338261
chrI	1338336	1339457
chrI	1339612	1341238
chrI	1341318	1342344
chrI	1342835	1343216
chrI	1344483	1345210
chrI	1345437	1345889
chrI	1346092	1346563
chrI	1346832	1347991
chrI	1358692	1359777
chrI	1360665	1361525
chrI	1361798	1363678
chrI	1364124	1366032
chrI	1366255	1366837
chrI	1367320	1369256
chrI	1369350	1369910
chrI	1370220	1373802
chrI	1375084	1375417
chrI	1376088	1376550
chrI	1399513	1399813
chrI	1401602	1401808
chrI	1403900	1404188
chrI	1404553	1404862
chrI	1405320	1406201
chrI	1407703	1408588
chrI	1409562	1410407
chrI	1410971	1413004
chrI	1413085	1414284
chrI	1417894	1418407
chrI	1419338	1419644
chrI	1420006	1420556
chrI	1425195	1426989
chrI	1429230	1431365
chrI	1434396	1434840
chrI	1435192	1435810
chrI	1444014	1445271
chrI	1445465	1447264
chrI	1448729	1449440
chrI	1450134	1451063
chrI	1452181	1452618
chrI	1453116	1454117
chrI	1455211	1455840
chrI	1460964	1461348
chrI	1462026	1463314
chrI	1480475	1482366
chrI	1482479	1482868
chrI	1486316	1490306
chrI	1493303	1494549
chrI	1497837	1498151
chrI	1508658	1508930
chrI	1529217	1529792
chrI	1536462	1538192
chrI	1541355	1541633
chrI	1541886	1542285
chrI	1542426	1542817
chrI	1542903	1543475
chrI	1545365	1546460
chrI	1547597	1552502
chrI	1552585	1553439
chrI	1553498	1559523
chrI	1560065	1561676
chrI	1562393	1562980
chrI	1564021	1565310
chrI	1566813	1567359
chrI	1573060	1573622
chrI	1575472	1575846
chrI	1576772	1577265
chrI	1579549	1579786
chrI	1580171	1581349
chrI	1581522	1582064
chrI	1582364	1582828
chrI	1591732	1592089
chrI	1594268	1594722
chrI	1595599	1595959
chrI	1597008	1597336
chrI	1597894	1598750
chrI	1610902	1611486
chrI	1611772	1612107
chrI	1612344	1612847
chrI	1613034	1613313
chrI	1619106	1621099
chrI	1621168	1624135
chrI	1625073	1625365
chrI	1626008	1626260
chrI	1626782	1627094
chrI	1627274	1627616
chrI	1628068	1629334
chrI	1629572	1629972
chrI	1632536	1632903
chrI	1633672	1634505
chrI	1637642	1638593
chrI	1639330	1640089
chrI	1640265	1641525
chrI	1642961	1643869
chrI	1646469	1646708
chrI	1650005	1650324
chrI	1660950	1663551
chrI	1665451	1665657
chrI	1665880	1666286
chrI	1669008	1669563
chrI	1670369	1670821
chrI	1671405	1671836
chrI	1672140	1672937
chrI	1673091	1673801
chrI	1681817	1682639
chrI	1685940	1686183
chrI	1687239	1687597
chrI	1688785	1689470
chrI	1690921	1691795
chrI	1694852	1695427
chrI	1695672	1695909
chrI	1696022	1696914
chrI	1697054	1697429
chrI	1697527	1699860
chrI	1700194	1700763
chrI	1706648	1706882
chrI	1715578	1716097
chrI	1716514	1716896
chrI	1717071	1717721
chrI	1719429	1721438
chrI	1722529	1722851
chrI	1725433	1726037
chrI	1727597	1727948
chrI	1732344	1732597
chrI	1738955	1740320
chrI	1740719	1741293
chrI	1743518	1743738
chrI	1746248	1748128
chrI	1755552	1758866
chrI	1760777	1762400
chrI	1773004	1775098
chrI	1775287	1778482
chrI	1778600	1779446
chrI	1791690	1792020
chrI	1792125	1792559
chrI	1797157	1797620
chrI	1800041	1800483
chrI	1809508	1809984
chrI	1810271	1811108
chrI	1813601	1813877
chrI	1815102	1817379
chrI	1819355	1819647
chrI	1821591	1822143
chrI	1822352	1822692
chrI	1822846	1823559
chrI	1824644	1825354
chrI	1832631	1838686
chrI	1838796	1842638
chrI	1843614	1844372
chrI	1845612	1846001
chrI	1846811	1847116
chrI	1849109	1849451
chrI	1849685	1849932
chrI	1851134	1851654
chrI	1851930	1853205
chrI	1863347	1863701
chrI	1872214	1872766
chrI	1873693	1874111
chrI	1876854	1878413
chrI	1883724	1884136
chrI	1890391	1890577
chrI	1893970	1894923
chrI	1896144	1896375
chrI	1899708	1899950
chrI	1900587	1900899
chrI	1901316	1901560
chrI	1910936	1911253
chrI	1911491	1914985
chrI	1915067	1917267
chrI	1919115	1922127
chrI	1926508	1927230
chrI	1930769	1931066
chrI	1958447	1958683
chrI	1968555	1969142
chrI	1969416	1969907
chrI	1970176	1970526
chrI	1971316	1972379
chrI	1973168	1973659
chrI	1973718	1974148
chrI	1977735	1979847
chrI	1981018	1981833
chrI	1987480	1987727
chrI	1997726	1999797
chrI	2002152	2003603
chrI	2003918	2004185
chrI	2005185	2005621
chrI	2005897	2006554
chrI	2008257	2008455
chrI	2008744	2009260
chrI	2009346	2010323
chrI	2010399	2010738
chrI	2011221	2011516
chrI	2011602	2011982
chrI	2012290	2012573
chrI	2018595	2018958
chrI	2019170	2019507
chrI	2019713	2020162
chrI	2020775	2021459
chrI	2021719	2022244
chrI	2022444	2022757
chrI	2022902	2023160
chrI	2023980	2024492
chrI	2024656	2024873
chrI	2030506	2031324
chrI	2032129	2033067
chrI	2033124	2034397
chrI	2034892	2035560
chrI	2035714	2039639
chrI	2039728	2040690
chrI	2040991	2041780
chrI	2042570	2043074
chrI	2043202	2043454
chrI	2043779	2045501
chrI	2046250	2048182
chrI	2048367	2050302
chrI	2052942	2053720
chrI	2054515	2061021
chrI	2061229	2061557
chrI	2061689	2062280
chrI	2062445	2063128
chrI	2066219	2067075
chrI	2067599	2068141
chrI	2068596	2070972
chrI	2076562	2078826
chrI	2078937	2079337
chrI	2080256	2081357
chrI	2081727	2082489
chrI	2082635	2083407
chrI	2083482	2084472
chrI	2084749	2085516
chrI	2085651	2086235
chrI	2094383	2094964
chrI	2095431	2096182
chrI	2096273	2096859
chrI	2096986	2097244
chrI	2099986	2100638
chrI	2113273	2113540
chrI	2115122	2117742
chrI	2117799	2118993
chrI	2119316	2120121
chrI	2120309	2121504
chrI	2121922	2122800
chrI	2124605	2124875
chrI	2126764	2127017
chrI	2127119	2127368
chrI	2127524	2128012
chrI	2128927	2129203
chrI	2129473	2129788
chrI	2132836	2133639
chrI	2140731	2141186
chrI	2143247	2144935
chrI	2145279	2145750
chrI	2146649	2146875
chrI	2154231	2154579
chrI	2154965	2155327
chrI	2155483	2156879
chrI	2169745	2170730
chrI	2171574	2172153
chrI	2175765	2176471
chrI	2192024	2192754
chrI	2203398	2203925
chrI	2205189	2206428
chrI	2231608	2231853
chrI	2248954	2250292
chrI	2250994	2251217
chrI	2254924	2255889
chrI	2272221	2272804
chrI	2273094	2273886
chrI	2279357	2280344
chrI	2290044	2291387
chrI	2291522	2295702
chrI	2295861	2298354
chrI	2299338	2300568
chrI	2300728	2303134
chrI	2306496	2307374
chrI	2311399	2312016
chrI	2315874	2317132
chrI	2318087	2319233
chrI	2321789	2323732
chrI	2330199	2330497
chrI	2334292	2336884
chrI	2336964	2338530
chrI	2339767	2340359
chrI	2363174	2364719
chrI	2373775	2374079
chrI	2375448	2375852
chrI	2375986	2377296
chrI	2377713	2378379
chrI	2380406	2381458
chrI	2383000	2383424
chrI	2383577	2383805
chrI	2385027	2385676
chrI	2386657	2386921
chrI	2387287	2387634
chrI	2389888	2390270
chrI	2393464	2394077
chrI	2401515	2401797
chrI	2403882	2405191
chrI	2406572	2406852
chrI	2407182	2407755
chrI	2408625	2409131
chrI	2409938	2410272
chrI	2410538	2410791
chrI	2411463	2412421
chrI	2415917	2416493
chrI	2417512	2418115
chrI	2418203	2418429
chrI	2418783	2420748
chrI	2421502	2422426
chrI	2423369	2423898
chrI	2427804	2428167
chrI	2431795	2433157
chrI	2435650	2436398
chrI	2453766	2454224
chrI	2456610	2457329
chrI	2464161	2464439
chrI	2477786	2478085
chrI	2485555	2485770
chrI	2486425	2487026
chrI	2489796	2490191
chrI	2493372	2494003
chrI	2495333	2496698
chrI	2502656	2502881
chrI	2506189	2507122
chrI	2514036	2514572
chrI	2514803	2515073
chrI	2532015	2532884
chrI	2538303	2538830
chrI	2554068	2554745
chrI	2578437	2578844
chrI	2579194	2579410
chrI	2579588	2580193
chrI	2580487	2581107
chrI	2581427	2582946
chrI	2583992	2585307
chrI	2585491	2586676
chrI	2586743	2589021
chrI	2591196	2591623
chrI	2598695	2599653
chrI	2604129	2604779
chrI	2605041	2605618
chrI	2617750	2618547
chrI	2619850	2620102
chrI	2620382	2620658
chrI	2622746	2623237
chrI	2626541	2629473
chrI	2630966	2633165
chrI	2639619	2639989
chrI	2642333	2642597
chrI	2647367	2647894
chrI	2656703	2657068
chrI	2663123	2663660
chrI	2667708	2668468
chrI	2680703	2682186
chrI	2687674	2689648
chrI	2689883	2690528
chrI	2695402	2695693
chrI	2704154	2704627
chrI	2705520	2706240
chrI	2706735	2707178
chrI	2711623	2712484
chrI	2716917	2717302
chrI	2724286	2724600
chrI	2727004	2731039
chrI	2731491	2732535
chrI	2736380	2737048
chrI	2752995	2753965
chrI	2754586	2755228
chrI	2758058	2758984
chrI	2759933	2760425
chrI	2760593	2761185
chrI	2762436	2762640
chrI	2772897	2773310
chrI	2776068	2777102
chrI	2777844	2778738
chrI	2822673	2823429
chrI	2827393	2827701
chrI	2830128	2832170
chrI	2832308	2832748
chrI	2835370	2835762
chrI	2855176	2856998
chrI	2857596	2857941
chrI	2858662	2858951
chrI	2860827	2862034
chrI	2865122	2865688
chrI	2865762	2867098
chrI	2867235	2868292
chrI	2868495	2870761
chrI	2874955	2877724
chrI	2877864	2878824
chrI	2889763	2890502
chrI	2890652	2891042
chrI	2895051	2895355
chrI	2900989	2901238
chrI	2902403	2902720
chrI	2905144	2905913
chrI	2906600	2906821
chrI	2919881	2920281
chrI	2920366	2920633
chrI	2924756	2925474
chrI	2928050	2928665
chrI	2932952	2933352
chrI	2935590	2935897
chrI	2936367	2936790
chrI	2944632	2945220
chrI	2950474	2951109
chrI	2951840	2952770
chrI	2955928	2956255
chrI	2956355	2956582
chrI	2958992	2959843
chrI	2959935	2960475
chrI	2962963	2963194
chrI	2991691	2992036
chrI	2995562	2996931
chrI	2998468	2998926
chrI	2999290	2999683
chrI	2999902	3001062
chrI	3008064	3008288
chrI	3009710	3010221
chrI	3016901	3017251
chrI	3028039	3028409
chrI	3033798	3034105
chrI	3034326	3034722
chrI	3034845	3036250
chrI	3037922	3038608
chrI	3039829	3040269
chrI	3047897	3048220
chrI	3052326	3052685
chrI	3060964	3061231
chrI	3061470	3064725
chrI	3072880	3073382
chrI	3077081	3077377
chrI	3079729	3080022
chrI	3085193	3085874
chrI	3086118	3086567
chrI	3098228	3100162
chrI	3105322	3105918
chrI	3106007	3106604
chrI	3112761	3113083
chrI	3140924	3141455
chrI	3143448	3144387
chrI	3147495	3148167
chrI	3149595	3151990
chrI	3152070	3152994
chrI	3157484	3157930
chrI	3161393	3162695
chrI	3167411	3168026
chrI	3170202	3170573
chrI	3171609	3172450
chrI	3172777	3173176
chrI	3198723	3199226
chrI	3205264	3205697
chrI	3209319	3210161
chrI	3210368	3210691
chrI	3227876	3228299
chrI	3246214	3249877
chrI	3254443	3254777
chrI	3262676	3264034
chrI	3266502	3266926
chrI	3269098	3269323
chrI	3283445	3284028
chrI	3287553	3288277
chrI	3292052	3294118
chrI	3294190	3295014
chrI	3309664	3310140
chrI	3331333	3331752
chrI	3333978	3334847
chrI	3334934	3335302
chrI	3337950	3338512
chrI	3338739	3339103
chrI	3339164	3339860
chrI	3339975	3340225
chrI	3343762	3344070
chrI	3349377	3350151
chrI	3364946	3366484
chrI	3366888	3368874
chrI	3371466	3371706
chrI	3371972	3372958
chrI	3373066	3374659
chrI	3375731	3375945
chrI	3376011	3376330
chrI	3389901	3393762
chrI	3408328	3408937
chrI	3409479	3409662
chrI	3409809	3409987
chrI	3414412	3414808
chrI	3416918	3417422
chrI	3432201	3432944
chrI	3438611	3439737
chrI	3440083	3440807
chrI	3441576	3442064
chrI	3442306	3442772
chrI	3451517	3451810
chrI	3456122	3457023
chrI	3459689	3460394
chrI	3462994	3463381
chrI	3464239	3464481
chrI	3466726	3467483
chrI	3480121	3480522
chrI	3481470	3481681
chrI	3484611	3484828
chrI	3484919	3485135
chrI	3501964	3502171
chrI	3507440	3508334
chrI	3510715	3511188
chrI	3511974	3513126
chrI	3513677	3514717
chrI	3516361	3516588
chrI	3518801	3519135
chrI	3520386	3520548
chrI	3523504	3523920
chrI	3525246	3525562
chrI	3540102	3540580
chrI	3546865	3547171
chrI	3552093	3552449
chrI	3553180	3553654
chrI	3557479	3557909
chrI	3559359	3559648
chrI	3562940	3563544
chrI	3564260	3564924
chrI	3567343	3567690
chrI	3601499	3601867
chrI	3603867	3604051
chrI	3608281	3608509
chrI	3610557	3610808
chrI	3611149	3611369
chrI	3624330	3624589
chrI	3627543	3627735
chrI	3636589	3636768
chrI	3656893	3657424
chrI	3663021	3663277
chrI	3664126	3666186
chrI	3681168	3681461
chrI	3682025	3682801
chrI	3692781	3693127
chrI	3700555	3700878
chrI	3704943	3705283
chrI	3707415	3707683
chrI	3710043	3710527
chrI	3721327	3722762
chrI	3723356	3723766
chrI	3726190	3726920
chrI	3733605	3733998
chrI	3737270	3740898
chrI	3741193	3741424
chrI	3742704	3742907
chrI	3753517	3753763
chrI	3754447	3754979
chrI	3755904	3756103
chrI	3756807	3757227
chrI	3761385	3761649
chrI	3762243	3762487
chrI	3763172	3765934
chrI	3783566	3783795
chrI	3784341	3784754
chrI	3787699	3787887
chrI	3787969	3789050
chrI	3792905	3793195
chrI	3793278	3793778
chrI	3793869	3794443
chrI	3797417	3797947
chrI	3805986	3806209
chrI	3806912	3807210
chrI	3817340	3817709
chrI	3817799	3818055
chrI	3822334	3823032
chrI	3823236	3824029
chrI	3824114	3825307
chrI	3829344	3830146
chrI	3830302	3831584
chrI	3834719	3835162
chrI	3853296	3853493
chrI	3854983	3855342
chrI	3858783	3859288
chrI	3860514	3861324
chrI	3862235	3862795
chrI	3865928	3867041
chrI	3867257	3867766
chrI	3870186	3870877
chrI	3873862	3874084
chrI	3881404	3881662
chrI	3888501	3888957
chrI	3910872	3911228
chrI	3919287	3920151
chrI	3931448	3932427
chrI	3934598	3935369
chrI	3976289	3976683
chrI	3980059	3981282
chrI	3982736	3983467
chrI	3986232	3986903
chrI	3987223	3987697
chrI	3996644	3997235
chrI	4037500	4037741
chrI	4114507	4115270
chrI	4116414	4116665
chrI	4125453	4125728
chrI	4132214	4132772
chrI	4135311	4135618
chrI	4138742	4139601
chrI	4142855	4143070
chrI	4167742	4168441
chrI	4170205	4172841
chrI	4185145	4186970
chrI	4201176	4202040
chrI	4210716	4210913
chrI	4213122	4213635
chrI	4265915	4266137
chrI	4297591	4298454
chrI	4302313	4302554
chrI	4374923	4375937
chrI	4376051	4376303
chrI	4381741	4382583
chrI	4385208	4386762
chrI	4428147	4428383
chrI	4432072	4432450
chrI	4435390	4435668
chrI	4444388	4444594
chrI	4451014	4451227
chrI	4454953	4455431
chrI	4456772	4457525
chrI	4459592	4460758
chrI	4463003	4463347
chrI	4463481	4465445
chrI	4465558	4467365
chrI	4473978	4474191
chrI	4474815	4475342
chrI	4479369	4479985
chrI	4488287	4489282
chrI	4490042	4490940
chrI	4534915	4535143
chrI	4535534	4536536
chrI	4536984	4537488
chrI	4540377	4542185
chrI	4542400	4543749
chrI	4543924	4546347
chrI	4546521	4547754
chrI	4548184	4548526
chrI	4556835	4557401
chrI	4572843	4574757
chrI	4583173	4587317
chrI	4602902	4603160
chrI	4606908	4607075
chrI	4607206	4607994
chrI	4608226	4608786
chrI	4633566	4633790
chrI	4636500	4636967
chrI	4645143	4647573
chrI	4653009	4653435
chrI	4653765	4654351
chrI	4662328	4662760
chrI	4663325	4663706
chrI	4672157	4672411
chrI	4699230	4699965
chrI	4701136	4701699
chrI	4701808	4702103
chrI	4705985	4706214
chrI	4734097	4734595
chrI	4746768	4747930
chrI	4761436	4761606
chrI	4762494	4762664
chrI	4765425	4768411
chrI	4769211	4770160
chrI	4779455	4780024
chrI	4785157	4786448
chrI	4789607	4791585
chrI	4824533	4824714
chrI	4848697	4849198
chrI	4895604	4896038
chrI	4910910	4911152
chrI	4913907	4918382
chrI	4926439	4926694
chrI	4958474	4961079
chrI	4961133	4962317
chrI	4967568	4967818
chrI	5082127	5082554
chrI	5092354	5092613
chrI	5104717	5105200
chrI	5110157	5110636
chrI	5113671	5114046
chrI	5127377	5127746
chrI	5134123	5134461
chrI	5138002	5138269
chrI	5142440	5142779
chrI	5144465	5145716
chrI	5152602	5153181
chrI	5153236	5153892
chrI	5164891	5165140
chrI	5170530	5172743
chrI	5174998	5176576
chrI	5186370	5186721
chrI	5244207	5244385
chrI	5256479	5256883
chrI	5261588	5261858
chrI	5268582	5268896
chrI	5271074	5271282
chrI	5272637	5273294
chrI	5273818	5274482
chrI	5294316	5294841
chrI	5294921	5296120
chrI	5296470	5297207
chrI	5298019	5298658
chrI	5300053	5300839
chrI	5307846	5308608
chrI	5311476	5312473
chrI	5312780	5313968
chrI	5315852	5317046
chrI	5319472	5319686
chrI	5357092	5357386
chrI	5367656	5368681
chrI	5370708	5373434
chrI	5377301	5378046
chrI	5379734	5380149
chrI	5381107	5381519
chrI	5388304	5388712
chrI	5408182	5408942
chrI	5412523	5412744
chrI	5420257	5420690
chrI	5429793	5430253
chrI	5431740	5431951
chrI	5452479	5453701
chrI	5454125	5454461
chrI	5455113	5455347
chrI	5455422	5455698
chrI	5470936	5471300
chrI	5484319	5486088
chrI	5509261	5509615
chrI	5549901	5550719
chrI	5567189	5567492
chrI	5571236	5573203
chrI	5576836	5579654
chrI	5593963	5594254
chrI	5594970	5595221
chrI	5608867	5609241
chrI	5619194	5622132
chrI	5626039	5626274
chrI	5637731	5638161
chrI	5639124	5639772
chrI	5678642	5679121
chrI	5691622	5692479
chrI	5706912	5707119
chrI	5707824	5708062
chrI	5741611	5742035
chrI	5745735	5746398
chrI	5762771	5763362
chrI	5774405	5775984
chrI	5791596	5792111
chrI	5803703	5803916
chrI	5806988	5808089
chrI	5817905	5818400
chrI	5827021	5827669
chrI	5827755	5827988
chrI	5869777	5871618
chrI	5904239	5905143
chrI	5914655	5915227
chrI	5939507	5939788
chrI	5976686	5976947
chrI	5978430	5979128
chrI	5980288	5982576
chrI	5982861	5983084
chrI	5984724	5986661
chrI	6003060	6003280
chrI	6061028	6061438
chrI	6067614	6067922
chrI	6081264	6081702
chrI	6082702	6082929
chrI	6090995	6091306
chrI	6091460	6091928
chrI	6092053	6093750
chrI	6114915	6115431
chrI	6116177	6116504
chrI	6117910	6118406
chrI	6136494	6136716
chrI	6171299	6171708
chrI	6174960	6175412
chrI	6183797	6184125
chrI	6210786	6211178
chrI	6219565	6221193
chrI	6224200	6224964
chrI	6230224	6230570
chrI	6282400	6285208
chrI	6314753	6315112
chrI	6317058	6318432
chrI	6358482	6358765
chrI	6366207	6366667
chrI	6368083	6368337
chrI	6369635	6370094
chrI	6407302	6407537
chrI	6446505	6446790
chrI	6459314	6459860
chrI	6460793	6461032
chrI	6465912	6466154
chrI	6467592	6467914
chrI	6472101	6472739
chrI	6472902	6473481
chrI	6497343	6497777
chrI	6498017	6500159
chrI	6513765	6514159
chrI	6532960	6533553
chrI	6541958	6542169
chrI	6554532	6554957
chrI	6564281	6565321
chrI	6565377	6566147
chrI	6569082	6569744
chrI	6572594	6573250
chrI	6573364	6574444
chrI	6574596	6575124
chrI	6577630	6578113
chrI	6578263	6578856
chrI	6579808	6580742
chrI	6586060	6586289
chrI	6607814	6609888
chrI	6609941	6610794
chrI	6611206	6611544
chrI	6626802	6627019
chrI	6647453	6648585
chrI	6660093	6660432
chrI	6722017	6722235
chrI	6723110	6724761
chrI	6756399	6756665
chrI	6771943	6773987
chrI	6779214	6779629
chrI	6780062	6780409
chrI	6799462	6800021
chrI	6812210	6812486
chrI	6834971	6838622
chrI	6846764	6847636
chrI	6854168	6857843
chrI	6877996	6878204
chrI	6898152	6898761
chrI	6948746	6950243
chrI	6950479	6950955
chrI	6973670	6974135
chrI	6982227	6982489
chrI	7014372	7014650
chrI	7015673	7016181
chrI	7017820	7021131
chrI	7021216	7022041
chrI	7056131	7059921
chrI	7078987	7087030
chrI	7098128	7098419
chrI	7099656	7100179
chrI	7132447	7132853
chrI	7147342	7149273
chrI	7156558	7157280
chrI	7159247	7159450
chrI	7218134	7218345
chrI	7224259	7224458
chrI	7234434	7235272
chrI	7239210	7239780
chrI	7244810	7246222
chrI	7251617	7251917
chrI	7254627	7255461
chrI	7285896	7286184
chrI	7313990	7314662
chrI	7314927	7315372
chrI	7315619	7317829
chrI	7330784	7331100
chrI	7345169	7345392
chrI	7352080	7352403
chrI	7466958	7467207
chrI	7472393	7472743
chrI	7474320	7475801
chrI	7476826	7477122
chrI	7489109	7490507
chrI	7490583	7493371
chrI	7494118	7494441
chrI	7494607	7494912
chrI	7500231	7501465
chrI	7503596	7504081
chrI	7518055	7522156
chrI	7541980	7544363
chrI	7544440	7545323
chrI	7553306	7553802
chrI	7554667	7555333
chrI	7559428	7559978
chrI	7571156	7572080
chrI	7573084	7574335
chrI	7584477	7588811
chrI	7595053	7595355
chrI	7595483	7595926
chrI	7596904	7597392
chrI	7597668	7598365
chrI	7634042	7634486
chrI	7656471	7660676
chrI	7667743	7668098
chrI	7694615	7695448
chrI	7698901	7699792
chrI	7706846	7707615
chrI	7707754	7710345
chrI	7721785	7722567
chrI	7740456	7742489
chrI	7772613	7773803
chrI	7779730	7781594
chrI	7781861	7782181
chrI	7814442	7815654
chrI	7834918	7836175
chrI	7844734	7846844
chrI	7858525	7860016
chrI	7860143	7862694
chrI	7865439	7865803
chrI	7866037	7866812
chrI	7866888	7872621
chrI	7883862	7884038
chrI	7894512	7895614
chrI	7914705	7915135
chrI	7926322	7927112
chrI	7934413	7936322
chrI	7940448	7941270
chrI	7945565	7945879
chrI	7961814	7962322
chrI	7970126	7970471
chrI	7985055	7985283
chrI	8024612	8024811
chrI	8028512	8029003
chrI	8029324	8029752
chrI	8045759	8047318
chrI	8048348	8049101
chrI	8082842	8083093
chrI	8098477	8098873
chrI	8109245	8109661
chrI	8109807	8110060
chrI	8124426	8124755
chrI	8133660	8134077
chrI	8172120	8172333
chrI	8213063	8214857
chrI	8218522	8219084
chrI	8219190	8219444
chrI	8223016	8223364
chrI	8223666	8224112
chrI	8224323	8224552
chrI	8245315	8245780
chrI	8288207	8288392
chrI	8293916	8294142
chrI	8294384	8294929
chrI	8304460	8304873
chrI	8309270	8309824
chrI	8315205	8315562
chrI	8328233	8329902
chrI	8331148	8331444
chrI	8369732	8370198
chrI	8393571	8394320
chrI	8410955	8411566
chrI	8412311	8413161
chrI	8416217	8416430
chrI	8425664	8426069
chrI	8426787	8426999
chrI	8434308	8434891
chrI	8487296	8487677
chrI	8490831	8491462
chrI	8531527	8531702
chrI	8567273	8567464
chrI	8581992	8582414
chrI	8590524	8590973
chrI	8609667	8609916
chrI	8614940	8615330
chrI	8617071	8617348
chrI	8636964	8637576
chrI	8637761	8638220
chrI	8660031	8660432
chrI	8663930	8665134
chrI	8676296	8681357
chrI	8681624	8681847
chrI	8692508	8693049
chrI	8695809	8696525
chrI	8701915	8702580
chrI	8747419	8747670
chrI	8751471	8751834
chrI	8751956	8752146
chrI	8757715	8758185
chrI	8759057	8759262
chrI	8759648	8760075
chrI	8760400	8763364
chrI	8789247	8789723
chrI	8791761	8792725
chrI	8807881	8808462
chrI	8813354	8813583
chrI	8815750	8816226
chrI	8816460	8816669
chrI	8839051	8839441
chrI	8917496	8917998
chrI	8918269	8919046
chrI	8949044	8949426
chrI	8949883	8950104
chrI	8952185	8952389
chrI	8952873	8953271
chrI	8969759	8970288
chrI	8992605	8992931
chrI	9013977	9014414
chrI	9050907	9053156
chrI	9053305	9054207
chrI	9057582	9058143
chrI	9077342	9077580
chrI	9079999	9080274
chrI	9085865	9086142
chrI	9086278	9086487
chrI	9100104	9100643
chrI	9100788	9101079
chrI	9108714	9109009
chrI	9110725	9111233
chrI	9111506	9111949
chrI	9112302	9113521
chrI	9113807	9114165
chrI	9114626	9116423
chrI	9117701	9118245
chrI	9126994	9127244
chrI	9127780	9129131
chrI	9129372	9131770
chrI	9133355	9133621
chrI	9137927	9138221
chrI	9141690	9141894
chrI	9145379	9146917
chrI	9163384	9163815
chrI	9165500	9171640
chrI	9172066	9172857
chrI	9173659	9174355
chrI	9226495	9227119
chrI	9274619	9274905
chrI	9280091	9280314
chrI	9287060	9287404
chrI	9307070	9308159
chrI	9314699	9315257
chrI	9322415	9322794
chrI	9327391	9327794
chrI	9328335	9328588
chrI	9334593	9336545
chrI	9347006	9347225
chrI	9347638	9347952
chrI	9372703	9376167
chrI	9377831	9384848
chrI	9385085	9386432
chrI	9393659	9393903
chrI	9400237	9400468
chrI	9422259	9422658
chrI	9428758	9429907
chrI	9448050	9448329
chrI	9469018	9469417
chrI	9470575	9471428
chrI	9501578	9502259
chrI	9505345	9506305
chrI	9511960	9513425
chrI	9545821	9546428
chrI	9569086	9569321
chrI	9570073	9570274
chrI	9581482	9581766
chrI	9583156	9583677
chrI	9585092	9585660
chrI	9605416	9605966
chrI	9606724	9606976
chrI	9607514	9607872
chrI	9611515	9611814
chrI	9619836	9620290
chrI	9622391	9623218
chrI	9624106	9625241
chrI	9625320	9626562
chrI	9630454	9631446
chrI	9665126	9665542
chrI	9681420	9682818
chrI	9682959	9683198
chrI	9688753	9689016
chrI	9689155	9690514
chrI	9709465	9711063
chrI	9721515	9722675
chrI	9725259	9725744
chrI	9732643	9734457
chrI	9734654	9735793
chrI	9737397	9737637
chrI	9751989	9754319
chrI	9761003	9761235
chrI	9768287	9768549
chrI	9786439	9789338
chrI	9789928	9790565
chrI	9790718	9791480
chrI	9792657	9793958
chrI	9819784	9821336
chrI	9851451	9853285
chrI	9853348	9854409
chrI	9854629	9856161
chrI	9856260	9859975
chrI	9869094	9871334
chrI	9937795	9939904
chrI	9940217	9941629
chrI	9942076	9944634
chrI	9945011	9945802
chrI	9945947	9946729
chrI	9946941	9947484
chrI	9960107	9960408
chrI	9962040	9965249
chrI	9970130	9970402
chrI	9971376	9971699
chrI	9979754	9979995
chrI	9983491	9983835
chrI	9984907	9985355
chrI	9985604	9985849
chrI	9988260	9989828
chrI	10031635	10033285
chrI	10034901	10038559
chrI	10102285	10102624
chrI	10102718	10105254
chrI	10105348	10105846
chrI	10106064	10106433
chrI	10116852	10117117
chrI	10121853	10125638
chrI	10130537	10133137
chrI	10136993	10137702
chrI	10140981	10141219
chrI	10141823	10142057
chrI	10173100	10173366
chrI	10173755	10177441
chrI	10181452	10182008
chrI	10183933	10186224
chrI	10187237	10187908
chrI	10231511	10232068
chrI	10232415	10235599
chrI	10235713	10235938
chrI	10238743	10239321
chrI	10282047	10282341
chrI	10328690	10328910
chrI	10330548	10332154
chrI	10333571	10336402
chrI	10349727	10350071
chrI	10350642	10350858
chrI	10372818	10373108
chrI	10382820	10383014
chrI	10398635	10398999
chrI	10418017	10418986
chrI	10419226	10422667
chrI	10432343	10433780
chrI	10436044	10437706
chrI	10445784	10446083
chrI	10463654	10464292
chrI	10468819	10469573
chrI	10478508	10478799
chrI	10478947	10479247
chrI	10484749	10486607
chrI	10486666	10488099
chrI	10516700	10517329
chrI	10517969	10518183
chrI	10541324	10541561
chrI	10552210	10554677
chrI	10560040	10562267
chrI	10562495	10563074
chrI	10565059	10565730
chrI	10565882	10566426
chrI	10567568	10570715
chrI	10587788	10588733
chrI	10593021	10593416
chrI	10593763	10594786
chrI	10598483	10598729
chrI	10633751	10634532
chrI	10636017	10636531
chrI	10650989	10651487
chrI	10653535	10654005
chrI	10677997	10678439
chrI	10685235	10685815
chrI	10686936	10687302
chrI	10688455	10688895
chrI	10713245	10713497
chrI	10716587	10717909
chrI	10718000	10718541
chrI	10720166	10720707
chrI	10749806	10750334
chrI	10750532	10751261
chrI	10751472	10752436
chrI	10752576	10763416
chrI	10764990	10770288
chrI	10770568	10772762
chrI	10774297	10774812
chrI	10776555	10776983
chrI	10777182	10777711
chrI	10783805	10785697
chrI	10787019	10789731
chrI	10792985	10793570
chrI	10808119	10808503
chrI	10840792	10841046
chrI	10866653	10867291
chrI	10872987	10873300
chrI	10881169	10881400
chrI	10903616	10904034
chrI	10926356	10926808
chrI	10926959	10928031
chrI	10945952	10947100
chrI	10947449	10948085
chrI	10948358	10949108
chrI	10949239	10950276
chrI	10951244	10951861
chrI	10954277	10954591
chrI	10957617	10960350
chrI	10964533	10965966
chrI	10966535	10967073
chrI	10973079	10975637
chrI	10977458	10979020
chrI	10980274	10981328
chrI	11005516	11006030
chrI	11007629	11008158
chrI	11011570	11011991
chrI	11025890	11026749
chrI	11031801	11034378
chrI	11034968	11035394
chrI	11035585	11036367
chrI	11037023	11037567
chrI	11045635	11046219
chrI	11050237	11051384
chrI	11051508	11054017
chrI	11054100	11062440
chrI	11062594	11066167
chrI	11068413	11076827
chrI	11077359	11079762
chrI	11081403	11082137
chrI	11082445	11083366
chrI	11083531	11086424
chrI	11088042	11096290
chrI	11096668	11099063
chrI	11099247	11101555
chrI	11101703	11102579
chrI	11102787	11103453
chrI	11103649	11110236
chrI	11110837	11111245
chrI	11111611	11111918
chrI	11120431	11121236
chrI	11125662	11126042
chrI	11136871	11137375
chrI	11149234	11149605
chrI	11164208	11165967
chrI	11166071	11167872
chrI	11168394	11169138
chrI	11169261	11171442
chrI	11172111	11174798
chrI	11182375	11182756
chrI	11183770	11184713
chrI	11184822	11185817
chrI	11196363	11196774
chrI	11203124	11204389
chrI	11206308	11206630
chrI	11221885	11222449
chrI	11224623	11225575
chrI	11225838	11226263
chrI	11228825	11229096
chrI	11233760	11234274
chrI	11253528	11254365
chrI	11257118	11257656
chrI	11259490	11259758
chrI	11260852	11261246
chrI	11262195	11262990
chrI	11266490	11267264
chrI	11273646	11274880
chrI	11275147	11275624
chrI	11275807	11276300
chrI	11276583	11277440
chrI	11280647	11281094
chrI	11281447	11282366
chrI	11282784	11283418
chrI	11289314	11289558
chrI	11289837	11290348
chrI	11290452	11291211
chrI	11292037	11292639
chrI	11293658	11293905
chrI	11304080	11307449
chrI	11315840	11317023
chrI	11321359	11323117
chrI	11323191	11323619
chrI	11326037	11326852
chrI	11328917	11330790
chrI	11330936	11331149
chrI	11331491	11333027
chrI	11335180	11335545
chrI	11357391	11357651
chrI	11363993	11366931
chrI	11367068	11368171
chrI	11369669	11372094
chrI	11372695	11373584
chrI	11377287	11377856
chrI	11380494	11388618
chrI	11388823	11389990
chrI	11390135	11393249
chrI	11393758	11394817
chrI	11395209	11396411
chrI	11396528	11399778
chrI	11400580	11402326
chrI	11406610	11408050
chrI	11408229	11408648
chrI	11408791	11409113
chrI	11416555	11416870
chrI	11417067	11417717
chrI	11420054	11421097
chrI	11438894	11440644
chrI	11450329	11450582
chrI	11453373	11453778
chrI	11467664	11468037
chrI	11470830	11471099
chrI	11479848	11481625
chrI	11485592	11488358
chrI	11504994	11505395
chrI	11505915	11506275
chrI	11507883	11508139
chrI	11517211	11517536
chrI	11518489	11522041
chrI	11525868	11526642
chrI	11526980	11528258
chrI	11529853	11530297
chrI	11531047	11534468
chrI	11537054	11537821
chrI	11545751	11546160
chrI	11552824	11553129
chrI	11556938	11557625
chrI	11576605	11577938
chrI	11579604	11579864
chrI	11580212	11580417
chrI	11580556	11580974
chrI	11584693	11586658
chrI	11597530	11598187
chrI	11598304	11598974
chrI	11599288	11600285
chrI	11602334	11602615
chrI	11602919	11603854
chrI	11604234	11604492
chrI	11606988	11607305
chrI	11607625	11608305
chrI	11608385	11609727
chrI	11612010	11613130
chrI	11613223	11614017
chrI	11614163	11614371
chrI	11615087	11616031
chrI	11627848	11628954
chrI	11649280	11650047
chrI	11652154	11652516
chrI	11655636	11656481
chrI	11656742	11657855
chrI	11661032	11661553
chrI	11664815	11665118
chrI	11667739	11668715
chrI	11672955	11673435
chrI	11676835	11678721
chrI	11679688	11679905
chrI	11681359	11681703
chrI	11684417	11685127
chrI	11685260	11685611
chrI	11686221	11687359
chrI	11689616	11690067
chrI	11693631	11694277
chrI	11728694	11729139
chrI	11742900	11743241
chrI	11745098	11747422
chrI	11762996	11763650
chrI	11763887	11764301
chrI	11781333	11782679
chrI	11792267	11793661
chrI	11798711	11799105
chrI	11801431	11801744
chrI	11803211	11803748
chrI	11805220	11805600
chrI	11830523	11830884
chrI	11837104	11837314
chrI	11839616	11839838
chrI	11841565	11841907
chrI	11842190	11842446
chrI	11842751	11843062
chrI	11843931	11844220
chrI	11851708	11852869
chrI	11853117	11853430
chrI	11861100	11862091
chrI	11868337	11868598
chrI	11868858	11869281
chrI	11869428	11873010
chrI	11874068	11875458
chrI	11876627	11876846
chrI	11876990	11877335
chrI	11878208	11878472
chrI	11885905	11886630
chrI	11896370	11896818
chrI	11903391	11903724
chrI	11905524	11906805
chrI	11908900	11911243
chrI	11924404	11924840
chrI	11930024	11930265
chrI	11930389	11932289
chrI	11933277	11933641
chrI	11934013	11934419
chrI	11946204	11946833
chrI	11947076	11947651
chrI	11949722	11950082
chrI	11950940	11951325
chrI	11951702	11952809
chrI	11964436	11965375
chrI	11965659	11966211
chrI	11967779	11968038
chrI	11969952	11970522
chrI	11975081	11975495
chrI	11977693	11978170
chrI	11984570	11984867
chrI	11987073	11987702
chrI	11990600	11990841
chrI	11995766	11998138
chrI	11998649	11999713
chrI	12006364	12006760
chrI	12008100	12008392
chrI	12009732	12010288
chrI	12017186	12017456
chrI	12020773	12020962
chrI	12033065	12033353
chrI	12039394	12040368
chrI	12040709	12041029
chrI	12043198	12045088
chrI	12045918	12046360
chrI	12046573	12047225
chrI	12048774	12049939
chrI	12054816	12055650
chrI	12065206	12066016
chrI	12066838	12067166
chrI	12067655	12067899
chrI	12068600	12069035
chrI	12071487	12071907
chrI	12077787	12079133
chrI	12093494	12094266
chrI	12105922	12106597
chrI	12134367	12134894
chrI	12135132	12135421
chrI	12141598	12141840
chrI	12142077	12142624
chrI	12144556	12145475
chrI	12146466	12146750
chrI	12149243	12150033
chrI	12163040	12163489
chrI	12168685	12169360
chrI	12173445	12174195
chrI	12177823	12178157
chrI	12182905	12183414
chrI	12183784	12184269
chrI	12184811	12185141
chrI	12185644	12186073
chrI	12189054	12189844
chrI	12194227	12194467
chrI	12197988	12198889
chrI	12199138	12199912
chrI	12202381	12202670
chrI	12206561	12207165
chrI	12209512	12209978
chrI	12212116	12212550
chrI	12212717	12213338
chrI	12213399	12215491
chrI	12219002	12219368
chrI	12222802	12223068
chrI	12223824	12224385
chrI	12225120	12226252
chrI	12226343	12226726
chrI	12227159	12227437
chrI	12228324	12228722
chrI	12229050	12229505
chrI	12285521	12286163
chrI	12286259	12287258
chrI	12287608	12288666
chrI	12289363	12289773
chrI	12319879	12320188
chrI	12324100	12325164
chrI	12471227	12471693
chrI	12478598	12479921
chrI	12479993	12481391
chrI	12482837	12483522
chrI	12483614	12483956
chrI	12484039	12484342
chrI	12486798	12487105
chrI	12487607	12487862
chrI	12487960	12488830
chrI	12489144	12489496
chrI	12489734	12490196
chrI	12490403	12490742
chrI	12490927	12491500
chrI	12492327	12492869
chrI	12493367	12494236
chrI	12494575	12495966
chrI	12509676	12510190
chrI	12510588	12511637
chrI	12512360	12512808
chrI	12512873	12513300
chrI	12513355	12514306
chrI	12516498	12517885
chrI	12518049	12519582
chrI	12520307	12520634
chrI	12523246	12524035
chrI	12524181	12525626
chrI	12525782	12530727
chrI	12531370	12532510
chrI	12534934	12536464
chrI	12536532	12537331
chrI	12539161	12539790
chrI	12547954	12548570
chrI	12550589	12551411
chrI	12562882	12563156
chrI	12566210	12566794
chrI	12570969	12572085
chrI	12574888	12575488
chrI	12595492	12596368
chrI	12596551	12598078
chrI	12601408	12601865
chrI	12603336	12603657
chrI	12645800	12647289
chrI	12649191	12650061
chrI	12652160	12656219
chrI	12664942	12665251
chrI	12671098	12672225
chrI	12672810	12673742
chrI	12676966	12677310
chrI	12716940	12717533
chrI	12727371	12727620
chrI	12732700	12733198
chrI	12735191	12735674
chrI	12736617	12737221
chrI	12737314	12738632
chrI	12738881	12741372
chrI	12742772	12743082
chrI	12749403	12752490
chrI	12755087	12756581
chrI	12757234	12759458
chrI	12759605	12760059
chrI	12772072	12772477
chrI	12773044	12773715
chrI	12774063	12774582
chrI	12778233	12778499
chrI	12800094	12800482
chrI	12800910	12801155
chrI	12806807	12807081
chrI	12810859	12812211
chrI	12812732	12813759
chrI	12813988	12817866
chrI	12817990	12818476
chrI	12818715	12820429
chrI	12823959	12824478
chrI	12825474	12826860
chrI	12827496	12828100
chrI	12828336	12828946
chrI	12833560	12834038
chrI	12836022	12836357
chrI	12838599	12838889
chrI	12840006	12840554
chrI	12846212	12846445
chrI	12851973	12852846
chrI	12858405	12859280
chrI	12861320	12861985
chrI	12862656	12863642
chrI	12863974	12864168
chrI	12876046	12876777
chrI	12876967	12877416
chrI	12882556	12883332
chrI	12885644	12888209
chrI	12889232	12891467
chrI	12891625	12892410
chrI	12892535	12894060
chrI	12896335	12897239
chrI	12899515	12900089
chrI	12903572	12908020
chrI	12910299	12910656
chrI	12915023	12922699
chrI	12922989	12924618
chrI	12927143	12928946
chrI	12955906	12957376
chrI	12960026	12961154
chrI	12961808	12962635
chrI	12964107	12967637
chrI	12968246	12968695
chrI	12969640	12970753
chrI	12972666	12973683
chrI	12973777	12975626
chrI	12981087	12981422
chrI	12995482	12995901
chrI	13007459	13011786
chrI	13016230	13019132
chrI	13019640	13020106
chrI	13021020	13022641
chrI	13052537	13052853
chrI	13056492	13056708
chrI	13056768	13056988
chrI	13062570	13063248
chrI	13129436	13129841
chrI	13154153	13155249
chrI	13155418	13158521
chrI	13158648	13159262
chrI	13159508	13160839
chrI	13160910	13161207
chrI	13161696	13162445
chrI	13180828	13181077
chrI	13181188	13181911
chrI	13190374	13190929
chrI	13219958	13220376
chrI	13230384	13232748
chrI	13266026	13266242
chrI	13275840	13276942
chrI	13280634	13280873
chrI	13284255	13284693
chrI	13286174	13287779
chrI	13289766	13293050
chrI	13297195	13298342
chrI	13309569	13309946
chrI	13310022	13310993
chrI	13315413	13315806
chrI	13315882	13316213
chrI	13317035	13317472
chrI	13317935	13318306
chrI	13319837	13320114
chrI	13320383	13320660
chrI	13322344	13322599
chrI	13322923	13323654
chrI	13323940	13324354
chrI	13326065	13326416
chrI	13327280	13327545
chrI	13330808	13331286
chrI	13335331	13335579
chrI	13336222	13336742
chrI	13337107	13337436
chrI	13337605	13338698
chrI	13347584	13347996
chrI	13352911	13353285
chrI	13362892	13363351
chrI	13366550	13367896
chrI	13368032	13372137
chrI	13383395	13385374
chrI	13387523	13388118
chrI	13394622	13395021
chrI	13397248	13398375
chrI	13402032	13402434
chrI	13402737	13402965
chrI	13404226	13408453
chrI	13411363	13411740
chrI	13420900	13421330
chrI	13422303	13423109
chrI	13434266	13435135
chrI	13445799	13447702
chrI	13448088	13449941
chrI	13454445	13455899
chrI	13458547	13459975
chrI	13461190	13462759
chrI	13463721	13464349
chrI	13482880	13483538
chrI	13484318	13484618
chrI	13484681	13485352
chrI	13485446	13489562
chrI	13490645	13491010
chrI	13491457	13491948
chrI	13493392	13494091
chrI	13500169	13501216
chrI	13503411	13504181
chrI	13510366	13510714
chrI	13511298	13512727
chrI	13513447	13514993
chrI	13521021	13521552
chrI	13521669	13521965
chrI	13522081	13524747
chrI	13525475	13526200
chrI	13526284	13526484
chrI	13526903	13527084
chrI	13527862	13528374
chrI	13532472	13532729
chrI	13533580	13534130
chrI	13535991	13536911
chrI	13537048	13538647
chrI	13541791	13543014
chrI	13543331	13544541
chrI	13546393	13547680
chrI	13548140	13548563
chrI	13551725	13552396
chrI	13559697	13560949
chrI	13561197	13561560
chrI	13561739	13564724
chrI	13564793	13566253
chrI	13575126	13578098
chrI	13578538	13579418
chrI	13579999	13581826
chrI	13581941	13582961
chrI	13583491	13583974
chrI	13584393	13584645
chrI	13585972	13587273
chrI	13588730	13589116
chrI	13592980	13598585
chrI	13598668	13599399
chrI	13599498	13604426
chrI	13604653	13606716
chrI	13609877	13616720
chrI	13617218	13617430
chrI	13620085	13620562
chrI	13626040	13626985
chrI	13631910	13633287
chrI	13633343	13637823
chrI	13638132	13640513
chrI	13641206	13641849
chrI	13641937	13643014
chrI	13643159	13645539
chrI	13645788	13646035
[truncated: 8,985 more rows]

## Sheet: LET-418 IDR peaks
chromosome	start	end
chrI	1	446
chrI	3331	4756
chrI	11256	11767
chrI	14814	16603
chrI	16772	17414
chrI	22241	22504
chrI	24425	24682
chrI	27014	27364
chrI	28071	28334
chrI	33600	34520
chrI	34591	36961
chrI	37906	39369
chrI	39452	43550
chrI	44830	45313
chrI	46327	47727
chrI	69754	70663
chrI	77926	78209
chrI	87744	88184
chrI	91388	91858
chrI	92185	92624
chrI	92741	93098
chrI	96040	96989
chrI	107673	110895
chrI	111855	113078
chrI	113141	113702
chrI	113852	115409
chrI	128227	128877
chrI	158876	159563
chrI	171902	173649
chrI	179007	180483
chrI	182546	183578
chrI	185144	185557
chrI	219109	220936
chrI	222626	222948
chrI	231876	232168
chrI	232708	232906
chrI	237657	238627
chrI	254641	255644
chrI	262151	262713
chrI	277011	277939
chrI	279246	282337
chrI	285083	285517
chrI	286573	287907
chrI	289050	289475
chrI	297370	298966
chrI	299080	300807
chrI	301265	301631
chrI	304139	304440
chrI	310417	311604
chrI	314151	316439
chrI	318103	318657
chrI	328397	328628
chrI	334648	335735
chrI	347340	347880
chrI	348031	348811
chrI	353241	353595
chrI	353808	357131
chrI	359736	360229
chrI	369708	370765
chrI	377180	380028
chrI	380252	383402
chrI	388873	389299
chrI	393190	394356
chrI	394884	396035
chrI	396509	399087
chrI	399547	400069
chrI	412944	413939
chrI	414132	414661
chrI	432042	432318
chrI	433272	433996
chrI	434509	434893
chrI	435495	435987
chrI	436119	436329
chrI	461498	461842
chrI	462288	465139
chrI	466591	467099
chrI	483643	483872
chrI	486651	486922
chrI	487067	487806
chrI	487931	488874
chrI	489226	491694
chrI	501771	503216
chrI	505922	506630
chrI	509213	510330
chrI	510387	511039
chrI	512651	513766
chrI	514896	515566
chrI	516295	517581
chrI	517743	520143
chrI	520287	521215
chrI	533253	534074
chrI	534237	534437
chrI	535306	535645
chrI	535796	537970
chrI	538439	538927
chrI	541987	544266
chrI	544497	545839
chrI	545932	546349
chrI	546680	550413
chrI	550573	550896
chrI	596808	597257
chrI	606688	607453
chrI	608313	611415
chrI	612831	613806
chrI	614219	615223
chrI	615746	616491
chrI	623480	623766
chrI	624152	630517
chrI	636606	637131
chrI	637356	638767
chrI	638857	640734
chrI	640912	641253
chrI	643421	643736
chrI	644154	645992
chrI	646068	646812
chrI	647323	654475
chrI	662977	663803
chrI	665288	665893
chrI	669368	670315
chrI	670539	671722
chrI	677667	677877
chrI	679992	681128
chrI	689417	689959
chrI	691265	691979
chrI	692166	700799
chrI	701744	703092
chrI	711062	711613
chrI	714160	715083
chrI	716301	717282
chrI	717371	718134
chrI	718196	720728
chrI	720941	721385
chrI	721683	722057
chrI	724585	725328
chrI	731101	731843
chrI	736713	737650
chrI	737729	738206
chrI	749176	749981
chrI	753458	754871
chrI	761532	764845
chrI	767514	768344
chrI	768948	770325
chrI	776682	777376
chrI	777506	777952
chrI	778063	778356
chrI	780417	781187
chrI	785593	786250
chrI	788582	789001
chrI	799261	799637
chrI	806998	807633
chrI	817874	818594
chrI	819481	820418
chrI	824539	826508
chrI	835243	835565
chrI	843035	843759
chrI	847593	850009
chrI	851269	853518
chrI	871653	872134
chrI	872635	874742
chrI	876274	885064
chrI	886496	888506
chrI	888664	891080
chrI	891162	891517
chrI	891654	892007
chrI	895829	896150
chrI	906947	907297
chrI	907542	908568
chrI	908762	909254
chrI	909371	909680
chrI	920546	921461
chrI	922866	925455
chrI	930490	930938
chrI	933487	934753
chrI	937043	937312
chrI	939476	939848
chrI	945932	946584
chrI	949698	950741
chrI	954086	954742
chrI	957177	958083
chrI	960477	961003
chrI	961257	961721
chrI	972840	974022
chrI	986463	987079
chrI	987334	987825
chrI	988878	989264
chrI	998546	999705
chrI	1010557	1011423
chrI	1014605	1018053
chrI	1018612	1019182
chrI	1019253	1019528
chrI	1030805	1031320
chrI	1031757	1032376
chrI	1033822	1034827
chrI	1046302	1046673
chrI	1047510	1048330
chrI	1048458	1049408
chrI	1049524	1054766
chrI	1059652	1060731
chrI	1060888	1063075
chrI	1064690	1065783
chrI	1066889	1070738
chrI	1073175	1076245
chrI	1076341	1076851
chrI	1077170	1077530
chrI	1082396	1082683
chrI	1086989	1087223
chrI	1095646	1096684
chrI	1097668	1098312
chrI	1098893	1099749
chrI	1100105	1100969
chrI	1106187	1106719
chrI	1116805	1118184
chrI	1120859	1124786
chrI	1133642	1133896
chrI	1139827	1140227
chrI	1156069	1156340
chrI	1167640	1168596
chrI	1174839	1175119
chrI	1209242	1210649
chrI	1210839	1211338
chrI	1212572	1214309
chrI	1221940	1222348
chrI	1222459	1222824
chrI	1222993	1223879
chrI	1223984	1225651
chrI	1226059	1231047
chrI	1231445	1231733
chrI	1241164	1241989
chrI	1251368	1251959
chrI	1263730	1264313
chrI	1264420	1265954
chrI	1266051	1266345
chrI	1266830	1267197
chrI	1268241	1268585
chrI	1269363	1269587
chrI	1270729	1271638
chrI	1272253	1272896
chrI	1273752	1274483
chrI	1278333	1279368
chrI	1279505	1281438
chrI	1283156	1283362
chrI	1283674	1285177
chrI	1288681	1289332
chrI	1293703	1294339
chrI	1295416	1295799
chrI	1295910	1297162
chrI	1298919	1300661
chrI	1301121	1301825
chrI	1303470	1305647
chrI	1306137	1306402
chrI	1311733	1314293
chrI	1315194	1315911
chrI	1316024	1316433
chrI	1316650	1317487
chrI	1320461	1321202
chrI	1323086	1324052
chrI	1327886	1328601
chrI	1334049	1338248
chrI	1338302	1339477
chrI	1339562	1341182
chrI	1341389	1342748
chrI	1342839	1343339
chrI	1344058	1345198
chrI	1345282	1345884
chrI	1346035	1346583
chrI	1347066	1347791
chrI	1360976	1361643
chrI	1362637	1363712
chrI	1365319	1366008
chrI	1366463	1366819
chrI	1367265	1369187
chrI	1370688	1370989
chrI	1371098	1373616
chrI	1374010	1374830
chrI	1383858	1384698
chrI	1403925	1404171
chrI	1404539	1404942
chrI	1405342	1406107
chrI	1407943	1408568
chrI	1409581	1410267
chrI	1411445	1412954
chrI	1413146	1414005
chrI	1415766	1416341
chrI	1420037	1420224
chrI	1425175	1426976
chrI	1429364	1431283
chrI	1435163	1435996
chrI	1443646	1448356
chrI	1448433	1449460
chrI	1452992	1454086
chrI	1455240	1455588
chrI	1458879	1459445
chrI	1462068	1463260
chrI	1477043	1477394
chrI	1481013	1483691
chrI	1486329	1490340
chrI	1493286	1493928
chrI	1508673	1508857
chrI	1540421	1541081
chrI	1541377	1541622
chrI	1542464	1543791
chrI	1547609	1548800
chrI	1558282	1559638
chrI	1562524	1563192
chrI	1564040	1565337
chrI	1575441	1575875
chrI	1580160	1581436
chrI	1582323	1582791
chrI	1588010	1588547
chrI	1594309	1594622
chrI	1595622	1596137
chrI	1597030	1597321
chrI	1597556	1599155
chrI	1609897	1610306
chrI	1610458	1612082
chrI	1612340	1612847
chrI	1618572	1624164
chrI	1625437	1625843
chrI	1626011	1627152
chrI	1627281	1627981
chrI	1628061	1629217
chrI	1629626	1629933
chrI	1637944	1638616
chrI	1639331	1641542
chrI	1642531	1644003
chrI	1647314	1648000
chrI	1651063	1651641
chrI	1661119	1663331
chrI	1668995	1671310
chrI	1671408	1672047
chrI	1672123	1673833
chrI	1675378	1676443
chrI	1676523	1677043
chrI	1681243	1681494
chrI	1685924	1686293
chrI	1687236	1689521
chrI	1690595	1691820
chrI	1692612	1693557
chrI	1694797	1695912
chrI	1697071	1697315
chrI	1697512	1699992
chrI	1700061	1700829
chrI	1700899	1702336
chrI	1712361	1712535
chrI	1715097	1715438
chrI	1715536	1715979
chrI	1716495	1716896
chrI	1717049	1717883
chrI	1718410	1721409
chrI	1722193	1722882
chrI	1738721	1740649
chrI	1740729	1741281
chrI	1746286	1748082
chrI	1755496	1759428
chrI	1760746	1762382
chrI	1778639	1779330
chrI	1791740	1792018
chrI	1792158	1792828
chrI	1797102	1797634
chrI	1800045	1800420
chrI	1807655	1808261
chrI	1809574	1810067
chrI	1815036	1817971
chrI	1819359	1819740
chrI	1820083	1820660
chrI	1821597	1822148
chrI	1822231	1823557
chrI	1825800	1826446
chrI	1832610	1833444
chrI	1834217	1838020
chrI	1838114	1839195
chrI	1839510	1840246
chrI	1840306	1842600
chrI	1843105	1844399
chrI	1844642	1845593
chrI	1849106	1849430
chrI	1849687	1849889
chrI	1852424	1853341
chrI	1872210	1872851
chrI	1873562	1875385
chrI	1876457	1878394
chrI	1890377	1890560
chrI	1892316	1893999
chrI	1894083	1894907
chrI	1911778	1912585
chrI	1913521	1914903
chrI	1915224	1916089
chrI	1916576	1916949
chrI	1919108	1922144
chrI	1926471	1927303
chrI	1930805	1931018
chrI	1958390	1958803
chrI	1971334	1973045
chrI	1973190	1975079
chrI	1977766	1978235
chrI	1987447	1987717
chrI	2002239	2002960
chrI	2005881	2006468
chrI	2010392	2012048
chrI	2012291	2012549
chrI	2019135	2021573
chrI	2021729	2022309
chrI	2022483	2023187
chrI	2023341	2026185
chrI	2030556	2031327
chrI	2031900	2034408
chrI	2036476	2036898
chrI	2039740	2039993
chrI	2041027	2041764
chrI	2044850	2045430
chrI	2050080	2050278
chrI	2061243	2061559
chrI	2061702	2062226
chrI	2066250	2067174
chrI	2067451	2070184
chrI	2070284	2070980
chrI	2074559	2074767
chrI	2076637	2078681
chrI	2078944	2079685
chrI	2083549	2084537
chrI	2084707	2086231
chrI	2086385	2087148
chrI	2093936	2095077
chrI	2095868	2096700
chrI	2100007	2100531
chrI	2118116	2118590
chrI	2124892	2125679
chrI	2126461	2127318
chrI	2128935	2129170
chrI	2143136	2145886
chrI	2153936	2154770
chrI	2154920	2157514
chrI	2167932	2168556
chrI	2169703	2170078
chrI	2182660	2183176
chrI	2190306	2191128
chrI	2201710	2202377
chrI	2203374	2204009
chrI	2204758	2206517
chrI	2209065	2209330
chrI	2210448	2210864
chrI	2248800	2250801
chrI	2250930	2251287
chrI	2254953	2255877
chrI	2267459	2268092
chrI	2268272	2270166
chrI	2272215	2272861
chrI	2273109	2274747
chrI	2279580	2280765
chrI	2290733	2293749
chrI	2294562	2295613
chrI	2295972	2296629
chrI	2299375	2300415
chrI	2306699	2307080
chrI	2307134	2307412
chrI	2311643	2312019
chrI	2312167	2313258
chrI	2315948	2316197
chrI	2318530	2319702
chrI	2321648	2323724
chrI	2332752	2333531
chrI	2333670	2336847
chrI	2336941	2337817
chrI	2337939	2338506
chrI	2339780	2340372
chrI	2363167	2364702
chrI	2369945	2370663
chrI	2376623	2378338
chrI	2379297	2379906
chrI	2380382	2381866
chrI	2382971	2383430
chrI	2383601	2385417
chrI	2390771	2391688
chrI	2393022	2394123
chrI	2401394	2401772
chrI	2404969	2405258
chrI	2405511	2405764
chrI	2407244	2407747
chrI	2409916	2410316
chrI	2410474	2410797
chrI	2411445	2412160
chrI	2414086	2414939
chrI	2416827	2417639
chrI	2417704	2418412
chrI	2418565	2421376
chrI	2421521	2422770
chrI	2423376	2423928
chrI	2433450	2434275
chrI	2435675	2436387
chrI	2453812	2454229
chrI	2455331	2455571
chrI	2485546	2485792
chrI	2487797	2488389
chrI	2489802	2490099
chrI	2495312	2497200
chrI	2513838	2515269
chrI	2515512	2516162
chrI	2516556	2517152
chrI	2538322	2538803
chrI	2554103	2554587
chrI	2577015	2577810
chrI	2578442	2579431
chrI	2579584	2581250
chrI	2581456	2582941
chrI	2583932	2584403
chrI	2585513	2588312
chrI	2588415	2590052
chrI	2591124	2592392
chrI	2598369	2599708
chrI	2602960	2605857
chrI	2615845	2617298
chrI	2617626	2618581
chrI	2620281	2620801
chrI	2622296	2623181
chrI	2628027	2629463
chrI	2629626	2630070
chrI	2632335	2633056
chrI	2634437	2635139
chrI	2636103	2636526
chrI	2639500	2639970
chrI	2647159	2647931
chrI	2654349	2655404
chrI	2655486	2656333
chrI	2656662	2657983
chrI	2658132	2660332
chrI	2662123	2662951
chrI	2663102	2670983
chrI	2673074	2673673
chrI	2679028	2680167
chrI	2680959	2683803
chrI	2684343	2684975
chrI	2686729	2690579
chrI	2703114	2703635
chrI	2703913	2704878
chrI	2705468	2706508
chrI	2707714	2708664
chrI	2710368	2712710
chrI	2722372	2722714
chrI	2726941	2729503
chrI	2729706	2731379
chrI	2731525	2732524
chrI	2749754	2749964
chrI	2752552	2753965
chrI	2758594	2758892
chrI	2760637	2762639
chrI	2763081	2763695
chrI	2773637	2774078
chrI	2774911	2775395
chrI	2776136	2777747
chrI	2777825	2778769
chrI	2803065	2803591
chrI	2822425	2823759
chrI	2829541	2829859
chrI	2830064	2830485
chrI	2830612	2832697
chrI	2834747	2836103
chrI	2847100	2847846
chrI	2850913	2851552
chrI	2852678	2853165
chrI	2853621	2853894
chrI	2854926	2855749
chrI	2855900	2858502
chrI	2858598	2858976
chrI	2859093	2862780
chrI	2863463	2864509
chrI	2865122	2865590
chrI	2865829	2868277
chrI	2868623	2869052
chrI	2869219	2870871
chrI	2871353	2871661
chrI	2875043	2878211
chrI	2879005	2880251
chrI	2900990	2901282
chrI	2907970	2908601
chrI	2914567	2914925
chrI	2919815	2920266
chrI	2927588	2929846
chrI	2935550	2936205
chrI	2936336	2936911
chrI	2943289	2943650
chrI	2944558	2945152
chrI	2949632	2951443
chrI	2955953	2956627
chrI	2958691	2960930
chrI	2962027	2962761
chrI	2985086	2985522
chrI	2995565	2996526
chrI	2999339	3001276
chrI	3008052	3008259
chrI	3009779	3011602
chrI	3015137	3015985
chrI	3019037	3020135
chrI	3029054	3029641
chrI	3030475	3030669
chrI	3034894	3036217
chrI	3037917	3038262
chrI	3045135	3045666
chrI	3048420	3049326
chrI	3061527	3064919
chrI	3069543	3070249
chrI	3085043	3085839
chrI	3096103	3096476
chrI	3098297	3098882
chrI	3100558	3101335
chrI	3101522	3102412
chrI	3103050	3103471
chrI	3106010	3106670
chrI	3116999	3117648
chrI	3119013	3119575
chrI	3121811	3122279
chrI	3142767	3144334
chrI	3152072	3152901
chrI	3162767	3163039
chrI	3167418	3168162
chrI	3170049	3170682
chrI	3172765	3173104
chrI	3176483	3176752
chrI	3192556	3192860
chrI	3205286	3205673
chrI	3206739	3206993
chrI	3209408	3210184
chrI	3227830	3228316
chrI	3242624	3244099
chrI	3245644	3249715
chrI	3250504	3251194
chrI	3262690	3263299
chrI	3265050	3266276
chrI	3266469	3266927
chrI	3269106	3269316
chrI	3269566	3269931
chrI	3281350	3282215
chrI	3283466	3283955
chrI	3287763	3288242
chrI	3291699	3293137
chrI	3293192	3294074
chrI	3295940	3296214
chrI	3296581	3298861
chrI	3309472	3310158
chrI	3324896	3325944
chrI	3330550	3331184
chrI	3332156	3333283
chrI	3333696	3335275
chrI	3335417	3336731
chrI	3337702	3339841
chrI	3343816	3344034
chrI	3349642	3351018
chrI	3351715	3352200
chrI	3365455	3365762
chrI	3365840	3366408
chrI	3366640	3367894
chrI	3375298	3376687
chrI	3377029	3377451
chrI	3381288	3382038
chrI	3382164	3382512
chrI	3389921	3393705
chrI	3405192	3405696
chrI	3409459	3409670
chrI	3409813	3409994
chrI	3412297	3412620
chrI	3419161	3419725
chrI	3427379	3428893
chrI	3432241	3432588
chrI	3455993	3457010
chrI	3457805	3458030
chrI	3459662	3460367
chrI	3466675	3467287
chrI	3473017	3473878
chrI	3479000	3479664
chrI	3480208	3480619
chrI	3481466	3481665
chrI	3500684	3501620
chrI	3501970	3502226
chrI	3507922	3508296
chrI	3512027	3512486
chrI	3513896	3514742
chrI	3515258	3515520
chrI	3516210	3516826
chrI	3529476	3529991
chrI	3533739	3533944
chrI	3546732	3547639
chrI	3553177	3553620
chrI	3562406	3564919
chrI	3567400	3567665
chrI	3626782	3628008
chrI	3636405	3636822
chrI	3638741	3639408
chrI	3646799	3647294
chrI	3647899	3648562
chrI	3663023	3663296
chrI	3664134	3666156
chrI	3671363	3672196
chrI	3672566	3673409
chrI	3680156	3681468
chrI	3681613	3682751
chrI	3684335	3684858
chrI	3709818	3711041
chrI	3712849	3713096
chrI	3713192	3714245
chrI	3718832	3719472
chrI	3720562	3724418
chrI	3724569	3725476
chrI	3726287	3726898
chrI	3733613	3733999
chrI	3736964	3741645
chrI	3749210	3749620
chrI	3753502	3755039
chrI	3755915	3756215
chrI	3756729	3757189
chrI	3758755	3759683
chrI	3761443	3761655
chrI	3763153	3764716
chrI	3781179	3781919
chrI	3783583	3783750
chrI	3783888	3786618
chrI	3787682	3787937
chrI	3788007	3788649
chrI	3793313	3793767
chrI	3796836	3797173
chrI	3797413	3798867
chrI	3804849	3807663
chrI	3816636	3817240
chrI	3817293	3818167
chrI	3821725	3822126
chrI	3822294	3825427
chrI	3825541	3828076
chrI	3828208	3831792
chrI	3841329	3841795
chrI	3842238	3843148
chrI	3854598	3854815
chrI	3858815	3859102
chrI	3860676	3863338
chrI	3865892	3868952
chrI	3873200	3874098
chrI	3898718	3900017
chrI	3906297	3906875
chrI	3907798	3908349
chrI	3910610	3911214
chrI	3919426	3919689
chrI	3931720	3932492
chrI	3955231	3956182
chrI	3956538	3957107
chrI	3959494	3959825
chrI	3976021	3976751
chrI	3979903	3981229
chrI	3982713	3983520
chrI	3985909	3986999
chrI	3987217	3988902
chrI	3990979	3991243
chrI	3992188	3992952
chrI	3993480	3993946
chrI	3994073	3994914
chrI	3995074	3995464
chrI	3996924	3997202
chrI	4004227	4010745
chrI	4011181	4011978
chrI	4012178	4014386
chrI	4014926	4016052
chrI	4016850	4019262
chrI	4020290	4021089
chrI	4029092	4029979
chrI	4030290	4030991
chrI	4032189	4032989
chrI	4081032	4081599
chrI	4114555	4114776
chrI	4128586	4129104
chrI	4132185	4132778
chrI	4136721	4137617
chrI	4138224	4141447
chrI	4158040	4158488
chrI	4167725	4168492
chrI	4170965	4176926
chrI	4177366	4178952
chrI	4185059	4186854
chrI	4199549	4200565
chrI	4201165	4202041
chrI	4210707	4210972
chrI	4213080	4213671
chrI	4215982	4216336
chrI	4216435	4216902
chrI	4221242	4221611
chrI	4224622	4225243
chrI	4253281	4254907
chrI	4270427	4271039
chrI	4297539	4298800
chrI	4299070	4300038
chrI	4302247	4302686
chrI	4303735	4304414
chrI	4305433	4306157
chrI	4311344	4312188
chrI	4312524	4313108
chrI	4313296	4314893
chrI	4315966	4317585
chrI	4320423	4321226
chrI	4322310	4323077
chrI	4323916	4324345
chrI	4327341	4329838
chrI	4329999	4331381
chrI	4331582	4332843
chrI	4332909	4333296
chrI	4333449	4335280
chrI	4367606	4368277
chrI	4374749	4375894
chrI	4381397	4383019
chrI	4385319	4387121
chrI	4431687	4432473
chrI	4432926	4433809
chrI	4434755	4435613
chrI	4435998	4437231
chrI	4444307	4444643
chrI	4451018	4451276
chrI	4456690	4457516
chrI	4459523	4460375
chrI	4466854	4467404
chrI	4474720	4475519
chrI	4484641	4487623
chrI	4487695	4491095
chrI	4491504	4492800
chrI	4493348	4497284
chrI	4511151	4512130
chrI	4515927	4517159
chrI	4535257	4536776
chrI	4537035	4537470
chrI	4540364	4542209
chrI	4542394	4543753
chrI	4543882	4545231
chrI	4556529	4557490
chrI	4573027	4574780
chrI	4578764	4579218
chrI	4579368	4579693
chrI	4583631	4585524
chrI	4586224	4587351
chrI	4587535	4588100
chrI	4597462	4598056
chrI	4602917	4603361
chrI	4608548	4608773
chrI	4633561	4633787
chrI	4635823	4636428
chrI	4636601	4636987
chrI	4644289	4644571
chrI	4645169	4645680
chrI	4645753	4646201
chrI	4646324	4647565
chrI	4650578	4654713
chrI	4662316	4662776
chrI	4663338	4663725
chrI	4671332	4673093
chrI	4673403	4674532
chrI	4698885	4702184
chrI	4702720	4703993
chrI	4704373	4704909
chrI	4720851	4721626
chrI	4727120	4727508
chrI	4744551	4746051
chrI	4746335	4748011
chrI	4748768	4749309
chrI	4754998	4755528
chrI	4765325	4766281
chrI	4767327	4768316
chrI	4768637	4771162
chrI	4771871	4772356
chrI	4772529	4773745
chrI	4774023	4774321
chrI	4774917	4775396
chrI	4785389	4786504
chrI	4786739	4787518
chrI	4787582	4788762
chrI	4788825	4792025
chrI	4792544	4792971
chrI	4803527	4805205
chrI	4805374	4805807
chrI	4829846	4830070
chrI	4847122	4848240
chrI	4881114	4881770
chrI	4887753	4888022
chrI	4888394	4888646
chrI	4889237	4889445
chrI	4906611	4907054
chrI	4907793	4908373
chrI	4908930	4909183
chrI	4910814	4911141
chrI	4911427	4911856
chrI	4912981	4913640
chrI	4913831	4918521
chrI	4918612	4918982
chrI	4920835	4921454
chrI	4926428	4926712
chrI	4931461	4931834
chrI	4932141	4934468
chrI	4935832	4938314
chrI	4941103	4942244
chrI	4958487	4959925
chrI	4961455	4962317
chrI	4967364	4967819
chrI	4968074	4968744
chrI	4973863	4975403
chrI	4975788	4976840
chrI	4976964	4978131
chrI	4979880	4980526
chrI	4993640	4994058
chrI	4994144	4994935
chrI	4995450	4995842
chrI	4995904	4996288
chrI	4996384	4997024
chrI	5023587	5024225
chrI	5024858	5025767
chrI	5027424	5028378
chrI	5030803	5031456
chrI	5032737	5033655
chrI	5034436	5036081
chrI	5036634	5036894
chrI	5037013	5037927
chrI	5056763	5057746
chrI	5061868	5062474
chrI	5069899	5070612
chrI	5081644	5082023
chrI	5082099	5082599
chrI	5084462	5085029
chrI	5086201	5087175
chrI	5092338	5092598
chrI	5104595	5106344
chrI	5110189	5110642
chrI	5113768	5114008
chrI	5122315	5122489
chrI	5126612	5129480
chrI	5129717	5132313
chrI	5133130	5135233
chrI	5139397	5140858
chrI	5142376	5142793
chrI	5144401	5145746
chrI	5157720	5157957
chrI	5158160	5159150
chrI	5164848	5165337
chrI	5175350	5176623
chrI	5189657	5190168
chrI	5243319	5243870
chrI	5244169	5244407
chrI	5255121	5256172
chrI	5261399	5261866
chrI	5268620	5268847
chrI	5271947	5273322
chrI	5274235	5274438
chrI	5287362	5287842
chrI	5289060	5289374
chrI	5289630	5290176
chrI	5290774	5290993
chrI	5291655	5292285
chrI	5294264	5296048
chrI	5296466	5296773
chrI	5298113	5298664
chrI	5300370	5300869
chrI	5305258	5315019
chrI	5315652	5317205
chrI	5318891	5319925
chrI	5345037	5345846
chrI	5353872	5354825
chrI	5356519	5357858
chrI	5357977	5358655
chrI	5368196	5368660
chrI	5371805	5373535
chrI	5373955	5374736
chrI	5374792	5377037
chrI	5377232	5378146
chrI	5378448	5380377
chrI	5380559	5381657
chrI	5383942	5384387
chrI	5385459	5386177
chrI	5386267	5387612
chrI	5388233	5390412
chrI	5390838	5391421
chrI	5408033	5408967
chrI	5409162	5413201
chrI	5416078	5416636
chrI	5419784	5420919
chrI	5421525	5423217
chrI	5429792	5430475
chrI	5431704	5431945
chrI	5455432	5455759
chrI	5470935	5471299
chrI	5485791	5486178
chrI	5498866	5499378
chrI	5508861	5509909
chrI	5511537	5512036
chrI	5518735	5519889
chrI	5540545	5541175
chrI	5543823	5544376
chrI	5545446	5546111
chrI	5549991	5550944
chrI	5567111	5567551
chrI	5572873	5573344
chrI	5579015	5579841
chrI	5588931	5590168
chrI	5593911	5594203
chrI	5606437	5607066
chrI	5608882	5609727
chrI	5610496	5611117
chrI	5618037	5618925
chrI	5619181	5622083
chrI	5625899	5626322
chrI	5626429	5627553
chrI	5637293	5638205
chrI	5638954	5639745
chrI	5678025	5678487
chrI	5678553	5679112
chrI	5691364	5692088
chrI	5695642	5696759
chrI	5697223	5698151
chrI	5698595	5699728
chrI	5706771	5708096
chrI	5745794	5746367
chrI	5762751	5763587
chrI	5768539	5769255
chrI	5774390	5774915
chrI	5775050	5775536
chrI	5806969	5808085
chrI	5824423	5826300
chrI	5826395	5828652
chrI	5828765	5829689
chrI	5842919	5843248
chrI	5865762	5866490
chrI	5869352	5872307
chrI	5887865	5888965
chrI	5904158	5905192
chrI	5905343	5905790
chrI	5914739	5915155
chrI	5936794	5937225
chrI	5939557	5939842
chrI	5974987	5975800
chrI	5976721	5976921
chrI	5982907	5983300
chrI	5985727	5986177
chrI	5986255	5986611
chrI	5996586	5998361
chrI	5998992	5999735
chrI	6003061	6003377
chrI	6011842	6012046
chrI	6050854	6052005
chrI	6052890	6053521
chrI	6057733	6058725
chrI	6060168	6061435
chrI	6061953	6064266
chrI	6073456	6074254
chrI	6074534	6075421
chrI	6075780	6076969
chrI	6077065	6077762
chrI	6079510	6080025
chrI	6080297	6082176
chrI	6082308	6083347
chrI	6090170	6095210
chrI	6102989	6104000
chrI	6105289	6106402
chrI	6107467	6108546
chrI	6114849	6115394
chrI	6116206	6116988
chrI	6117147	6123300
chrI	6135231	6136899
chrI	6151558	6151916
chrI	6153346	6154956
chrI	6163205	6164796
chrI	6166277	6168487
chrI	6171054	6171879
chrI	6172652	6173578
chrI	6174684	6175837
chrI	6183510	6184391
chrI	6209504	6211236
chrI	6212211	6213269
chrI	6215280	6215698
chrI	6219384	6221635
chrI	6224237	6224860
chrI	6258720	6259848
chrI	6259967	6260882
chrI	6264883	6265322
chrI	6277274	6277762
chrI	6278999	6279649
chrI	6280252	6280777
chrI	6282022	6284850
chrI	6285673	6286045
chrI	6288263	6288987
chrI	6289765	6290517
chrI	6293658	6295268
chrI	6317262	6318931
chrI	6334749	6335605
chrI	6336445	6337943
chrI	6338178	6339355
chrI	6339449	6342464
chrI	6358247	6358895
chrI	6365005	6367329
chrI	6368126	6368624
chrI	6369713	6370087
chrI	6372468	6376099
chrI	6377824	6379503
chrI	6379559	6381760
chrI	6397987	6398514
chrI	6407199	6407547
chrI	6412218	6413180
chrI	6421632	6422315
chrI	6446388	6446843
chrI	6458006	6459086
chrI	6459141	6461104
chrI	6465482	6466215
chrI	6471875	6472733
chrI	6473123	6473375
chrI	6488782	6489389
chrI	6496157	6496955
chrI	6497033	6497639
chrI	6499562	6499820
chrI	6513794	6514154
chrI	6532417	6533631
chrI	6533772	6534161
chrI	6541965	6542201
chrI	6552434	6553827
chrI	6554461	6556466
chrI	6563664	6565279
chrI	6565356	6566356
chrI	6568996	6570849
chrI	6570932	6571141
chrI	6571368	6575222
chrI	6575288	6579541
chrI	6579712	6584146
chrI	6584298	6586471
chrI	6588774	6589624
chrI	6593277	6593633
chrI	6607791	6608673
chrI	6608727	6609756
chrI	6610147	6610520
chrI	6610907	6611973
chrI	6626737	6627308
chrI	6647258	6648589
chrI	6660082	6660424
chrI	6712696	6713265
chrI	6716965	6718170
chrI	6720860	6723682
chrI	6724154	6725052
chrI	6728367	6728838
chrI	6729133	6729457
chrI	6731811	6732348
chrI	6732456	6733905
chrI	6736192	6736356
chrI	6736729	6737379
chrI	6745115	6745882
chrI	6756325	6758050
chrI	6779241	6779526
chrI	6780046	6780451
chrI	6780667	6782264
chrI	6789934	6790870
chrI	6799295	6800025
chrI	6814155	6814720
chrI	6823195	6824506
chrI	6834497	6839475
chrI	6846789	6847685
chrI	6854220	6855298
chrI	6877984	6878205
chrI	6881638	6882738
chrI	6882912	6883220
chrI	6884187	6885593
chrI	6893087	6894567
chrI	6913811	6914934
chrI	6923185	6923714
chrI	6923790	6924047
chrI	6930416	6930868
chrI	6933055	6933811
chrI	6942694	6943548
chrI	6945586	6946155
chrI	6948574	6951800
chrI	6958726	6959148
chrI	6969995	6970894
chrI	6973564	6974901
chrI	6996944	6998000
chrI	7005052	7005829
chrI	7014358	7014926
chrI	7015503	7016368
chrI	7017742	7018282
chrI	7018397	7019120
chrI	7019249	7022068
chrI	7036671	7037414
chrI	7039525	7040863
chrI	7054468	7055143
chrI	7055254	7060213
chrI	7073244	7074101
chrI	7078593	7088940
chrI	7094945	7096117
chrI	7097802	7098491
chrI	7099113	7100286
chrI	7125270	7126155
chrI	7126213	7130115
chrI	7130411	7131316
chrI	7132424	7132633
chrI	7147067	7150431
chrI	7155731	7159457
chrI	7174235	7174783
chrI	7175174	7175777
chrI	7176603	7177251
chrI	7194785	7195199
chrI	7214556	7215426
chrI	7216366	7218218
chrI	7224592	7224878
chrI	7234496	7235172
chrI	7251536	7251963
chrI	7254730	7255500
chrI	7279195	7279654
chrI	7284646	7284946
chrI	7285935	7286168
chrI	7287452	7288116
chrI	7289446	7290019
chrI	7290108	7291082
chrI	7302803	7303742
chrI	7304608	7305259
chrI	7313713	7315440
chrI	7315582	7317228
chrI	7318815	7319115
chrI	7321373	7322023
chrI	7330750	7331156
chrI	7345010	7345419
chrI	7346585	7347501
chrI	7347559	7348268
chrI	7352120	7352315
chrI	7401967	7402657
chrI	7403373	7404043
chrI	7404854	7405570
chrI	7408919	7410152
chrI	7421103	7421697
chrI	7466224	7466850
chrI	7466986	7467218
chrI	7467289	7468199
chrI	7471867	7479077
chrI	7479150	7480552
chrI	7489116	7495789
chrI	7499514	7502020
chrI	7502173	7503204
chrI	7503517	7504554
chrI	7515524	7516529
chrI	7517143	7521544
chrI	7541982	7545894
chrI	7547290	7550997
chrI	7552045	7553906
chrI	7554653	7555099
chrI	7559535	7560036
chrI	7562809	7564292
chrI	7564364	7565238
chrI	7569892	7572029
chrI	7573079	7574417
chrI	7574593	7576154
chrI	7581308	7582399
chrI	7584434	7586766
chrI	7588065	7588838
chrI	7595018	7598425
chrI	7601172	7602144
chrI	7612634	7613162
chrI	7639926	7640224
chrI	7649921	7650152
chrI	7655702	7664068
chrI	7666553	7666872
chrI	7675905	7676399
chrI	7678932	7679354
chrI	7688353	7689749
chrI	7691109	7691498
chrI	7694916	7695574
chrI	7699085	7699813
chrI	7700944	7701570
chrI	7701659	7703414
chrI	7705892	7706494
chrI	7706807	7711361
chrI	7711455	7715098
chrI	7715621	7715971
chrI	7718361	7719788
chrI	7723114	7723670
chrI	7726241	7726986
chrI	7739663	7742485
chrI	7753245	7753776
chrI	7770726	7771765
chrI	7771893	7772957
chrI	7778225	7778733
chrI	7779750	7781157
chrI	7781260	7781610
chrI	7781764	7782158
chrI	7783270	7783825
chrI	7814255	7815665
chrI	7834886	7836252
chrI	7842717	7843087
chrI	7848114	7849696
chrI	7857421	7858450
chrI	7858506	7859034
chrI	7859131	7863226
chrI	7863904	7864179
chrI	7865311	7866762
chrI	7866844	7872026
chrI	7872093	7872907
chrI	7883473	7884273
chrI	7895002	7895684
chrI	7912247	7914319
chrI	7914682	7915386
chrI	7934409	7936350
chrI	7940143	7940969
chrI	7941044	7943209
chrI	7945221	7946358
chrI	7951258	7953450
chrI	7954436	7955579
chrI	7961801	7962522
chrI	7968078	7969803
chrI	8009477	8011150
chrI	8011249	8012066
chrI	8013168	8013995
chrI	8014294	8014662
chrI	8018119	8018700
chrI	8018863	8019891
chrI	8021184	8021557
chrI	8023400	8023899
chrI	8024469	8024847
chrI	8027906	8029762
chrI	8044257	8044744
chrI	8044956	8047649
chrI	8047734	8048879
chrI	8049127	8049756
chrI	8057809	8058064
chrI	8058143	8058686
chrI	8082611	8083055
chrI	8083344	8083784
chrI	8099833	8100721
chrI	8101340	8103388
chrI	8119110	8119521
chrI	8122891	8123169
chrI	8124245	8125921
chrI	8130149	8131319
chrI	8133058	8135055
chrI	8135127	8137477
chrI	8213495	8214401
chrI	8218473	8219072
chrI	8219173	8219449
chrI	8222727	8224966
chrI	8245254	8246181
chrI	8259108	8259808
chrI	8288193	8289341
chrI	8290786	8291395
chrI	8293868	8294252
chrI	8301806	8302359
chrI	8304511	8306785
chrI	8307455	8308363
chrI	8308655	8309161
chrI	8309248	8310381
chrI	8315163	8315535
chrI	8323881	8324218
chrI	8328860	8330158
chrI	8330926	8331470
chrI	8332900	8333334
chrI	8344344	8344953
chrI	8369445	8370305
chrI	8391760	8393102
chrI	8393168	8394276
chrI	8406676	8406964
chrI	8409531	8410446
chrI	8410615	8413403
chrI	8416167	8416454
chrI	8425434	8427791
chrI	8453911	8454614
chrI	8487286	8487701
chrI	8529408	8530409
chrI	8532373	8532557
chrI	8563349	8563833
chrI	8567937	8568299
chrI	8569937	8570281
chrI	8573944	8574655
chrI	8579992	8580353
chrI	8581591	8582194
chrI	8590186	8591023
chrI	8608167	8609361
chrI	8609596	8610073
chrI	8614318	8615957
chrI	8617081	8617379
chrI	8636960	8638700
chrI	8663728	8665185
chrI	8681636	8681837
chrI	8682059	8682551
chrI	8692259	8693421
chrI	8696086	8696510
chrI	8702129	8702579
chrI	8728329	8728720
chrI	8731459	8732661
chrI	8747853	8748800
chrI	8751463	8751798
chrI	8757606	8758180
chrI	8759330	8763885
chrI	8783589	8784867
chrI	8785156	8785712
chrI	8786024	8787582
chrI	8787749	8788225
chrI	8788799	8789789
chrI	8789855	8791565
chrI	8791730	8792763
chrI	8807804	8808942
chrI	8813322	8813636
chrI	8815758	8816173
chrI	8816424	8816691
chrI	8839026	8839643
chrI	8851458	8852124
chrI	8852252	8853439
chrI	8863189	8863500
chrI	8865167	8865988
chrI	8901429	8902024
chrI	8916701	8919055
chrI	8927332	8928485
chrI	8949068	8949433
chrI	8952853	8953370
chrI	8961464	8962211
chrI	8969705	8970267
chrI	8985039	8985291
chrI	8985585	8986564
chrI	8986850	8987645
chrI	9013725	9014760
chrI	9042102	9042645
chrI	9042791	9043162
chrI	9044777	9045156
chrI	9050842	9052554
chrI	9053352	9054179
chrI	9054313	9056064
chrI	9056866	9058257
chrI	9064143	9065567
chrI	9074567	9075079
chrI	9076016	9076598
chrI	9076813	9078208
chrI	9079555	9081158
chrI	9082838	9083721
chrI	9085850	9086532
chrI	9087044	9087582
chrI	9088189	9089748
chrI	9092125	9096171
chrI	9096636	9097051
chrI	9097214	9099369
chrI	9099889	9101254
chrI	9105242	9106535
chrI	9106605	9106910
chrI	9108639	9109620
chrI	9110404	9117546
chrI	9121452	9121896
chrI	9127775	9132234
chrI	9133297	9133662
chrI	9137895	9138206
chrI	9141325	9141943
chrI	9145352	9146482
chrI	9149178	9149579
chrI	9150289	9150588
chrI	9162805	9163838
chrI	9163916	9169853
chrI	9171450	9172922
chrI	9173110	9173468
chrI	9173621	9174307
chrI	9175838	9177389
chrI	9179663	9180503
chrI	9186761	9187086
chrI	9187448	9188619
chrI	9188704	9190012
chrI	9197281	9198464
chrI	9198797	9201219
chrI	9226368	9227165
chrI	9243033	9243823
chrI	9244129	9245029
chrI	9249086	9249748
chrI	9266764	9267499
chrI	9268649	9269695
chrI	9270915	9271355
chrI	9273912	9276678
chrI	9279051	9279623
chrI	9279751	9279931
chrI	9280073	9280986
chrI	9286605	9287801
chrI	9298081	9298802
chrI	9306712	9308712
chrI	9314712	9316183
chrI	9316461	9317372
chrI	9319817	9320314
chrI	9322209	9323144
chrI	9327305	9329158
chrI	9330636	9331970
chrI	9332342	9333126
chrI	9333985	9334219
chrI	9339231	9339863
chrI	9342324	9344671
chrI	9347021	9347235
chrI	9347682	9347934
chrI	9372591	9376194
chrI	9377880	9384792
chrI	9385077	9386759
chrI	9390124	9390803
chrI	9393330	9393884
chrI	9398572	9400535
chrI	9401324	9401984
chrI	9402686	9403253
chrI	9404244	9405551
chrI	9422232	9423041
chrI	9423773	9429980
chrI	9430056	9431783
chrI	9434736	9435586
chrI	9445207	9446107
chrI	9446311	9446830
chrI	9447062	9447745
chrI	9447945	9449101
chrI	9449194	9450431
chrI	9469861	9472571
chrI	9474739	9475293
chrI	9495311	9497095
chrI	9500672	9501412
chrI	9501611	9502402
chrI	9505170	9506363
chrI	9511922	9513343
chrI	9513854	9514504
chrI	9514583	9514975
chrI	9515079	9517111
chrI	9540641	9541434
chrI	9541586	9542234
chrI	9544499	9545045
chrI	9569121	9569293
chrI	9580934	9582089
chrI	9584973	9585585
chrI	9587668	9588174
chrI	9598142	9598692
chrI	9603061	9603762
chrI	9604703	9605180
chrI	9605239	9606339
chrI	9606703	9606955
chrI	9607539	9607852
chrI	9610165	9611851
chrI	9616312	9616513
chrI	9618948	9619694
chrI	9619754	9620470
chrI	9622374	9622673
chrI	9625393	9626346
chrI	9630653	9631685
chrI	9649843	9650685
chrI	9665057	9665538
chrI	9669821	9671200
chrI	9679077	9679840
chrI	9682566	9683422
chrI	9688160	9689319
chrI	9698485	9700322
chrI	9700646	9701367
chrI	9701663	9702255
chrI	9702614	9704739
chrI	9709539	9710000
chrI	9710331	9711036
chrI	9720293	9721352
chrI	9721461	9723490
chrI	9724219	9726270
chrI	9727523	9728243
chrI	9729757	9734763
chrI	9734841	9736870
chrI	9737376	9738075
chrI	9739109	9739814
chrI	9744198	9744597
chrI	9747729	9748320
chrI	9750674	9754400
chrI	9767881	9768517
chrI	9773124	9773327
chrI	9773654	9774884
chrI	9785841	9791494
chrI	9791944	9793658
chrI	9819823	9820642
chrI	9836913	9837521
chrI	9838538	9840304
chrI	9840528	9843328
chrI	9845377	9845659
chrI	9845972	9846877
chrI	9848046	9848788
chrI	9849670	9859479
chrI	9862049	9863450
chrI	9868551	9872232
chrI	9872701	9873728
chrI	9881831	9882719
chrI	9882865	9884104
chrI	9900303	9901347
chrI	9903096	9903833
chrI	9929203	9929791
chrI	9937127	9941402
chrI	9941466	9944613
chrI	9944948	9945777
chrI	9947006	9947502
chrI	9947795	9948506
chrI	9961877	9964957
chrI	9970141	9970441
chrI	9971349	9971690
chrI	9979623	9979994
chrI	9983506	9983909
chrI	9984078	9985977
chrI	9988354	9989568
chrI	10025926	10026202
chrI	10029856	10030509
chrI	10031423	10033330
chrI	10033461	10038549
chrI	10038697	10041051
chrI	10043958	10044592
chrI	10045772	10046219
chrI	10046354	10046957
chrI	10063063	10064075
chrI	10079546	10079904
chrI	10085315	10086102
chrI	10092506	10092936
chrI	10093805	10094483
chrI	10094730	10095911
chrI	10096901	10097829
chrI	10097907	10100812
chrI	10101604	10107134
chrI	10116197	10117276
chrI	10121094	10123759
chrI	10131099	10131636
chrI	10131799	10132307
chrI	10132459	10133102
chrI	10137010	10137557
chrI	10140999	10141233
chrI	10155098	10155343
chrI	10173131	10175977
chrI	10176067	10176751
chrI	10176836	10178859
chrI	10179069	10179420
chrI	10181467	10181999
chrI	10184058	10185643
chrI	10196657	10197856
chrI	10226879	10227458
chrI	10231012	10236663
chrI	10261984	10262888
chrI	10280510	10281071
chrI	10281838	10282381
chrI	10282496	10284799
chrI	10284959	10285972
chrI	10296034	10298719
chrI	10302830	10303302
chrI	10318978	10319328
chrI	10330408	10331490
chrI	10351416	10351759
chrI	10355232	10355708
chrI	10373848	10374140
chrI	10398646	10399556
chrI	10400533	10401340
chrI	10403118	10404096
chrI	10405826	10406402
chrI	10407194	10407882
chrI	10408700	10410107
chrI	10417097	10417742
chrI	10421985	10422552
chrI	10434808	10436079
chrI	10436142	10437739
chrI	10437886	10438825
chrI	10445820	10446777
chrI	10462456	10462884
chrI	10463597	10464354
chrI	10468778	10469572
chrI	10474561	10474874
chrI	10477734	10478869
chrI	10478964	10479232
chrI	10484820	10486360
chrI	10490984	10491452
chrI	10497888	10498199
chrI	10499437	10500190
chrI	10516083	10518207
chrI	10537985	10538416
chrI	10538876	10540003
chrI	10540506	10541912
chrI	10542283	10543371
chrI	10549558	10549979
chrI	10551967	10555109
chrI	10559988	10562356
chrI	10562431	10567187
chrI	10567288	10568983
chrI	10569131	10570395
chrI	10584491	10586112
chrI	10586370	10588874
chrI	10592208	10593905
chrI	10593970	10594734
chrI	10598473	10598772
chrI	10606581	10606921
chrI	10622773	10622961
chrI	10636029	10636429
chrI	10642378	10642912
chrI	10651031	10651518
chrI	10653540	10654142
chrI	10677890	10678517
chrI	10685158	10685809
chrI	10686884	10687849
chrI	10689732	10690227
chrI	10691601	10692216
chrI	10713268	10713520
chrI	10717147	10717590
chrI	10717812	10718529
chrI	10720181	10720480
chrI	10728297	10729294
chrI	10733444	10734151
chrI	10746285	10749539
chrI	10749745	10750402
chrI	10750467	10763388
chrI	10763485	10763708
chrI	10764054	10764520
chrI	10764972	10767722
chrI	10767836	10770291
chrI	10770446	10772779
chrI	10772916	10773693
chrI	10774239	10775135
chrI	10775633	10777832
chrI	10787716	10788175
chrI	10788407	10789198
chrI	10795826	10796248
chrI	10797612	10798004
chrI	10798119	10798531
chrI	10807012	10807708
chrI	10816140	10816737
chrI	10830353	10831093
chrI	10866414	10867313
chrI	10871482	10871771
chrI	10872598	10873302
chrI	10874897	10875434
chrI	10895072	10895377
chrI	10926327	10928042
chrI	10957798	10958148
chrI	10964823	10966028
chrI	10966524	10967670
chrI	10969226	10972347
chrI	10972504	10975613
chrI	10976901	10979065
chrI	10979395	10981447
chrI	10990499	10991449
chrI	10992262	10992902
chrI	10997632	10997962
chrI	11001101	11001601
chrI	11002498	11003375
chrI	11004969	11006674
chrI	11007566	11008305
chrI	11014154	11014654
chrI	11017547	11018505
chrI	11025887	11026386
chrI	11031156	11036054
chrI	11047256	11048563
chrI	11049216	11051894
chrI	11062703	11063482
chrI	11075293	11075673
chrI	11076285	11076887
chrI	11079143	11079740
chrI	11085841	11086424
chrI	11090328	11094312
chrI	11095424	11096307
chrI	11096797	11097700
chrI	11100804	11101524
chrI	11104613	11104967
chrI	11108044	11109496
chrI	11111390	11111908
chrI	11120349	11121272
chrI	11124122	11125287
chrI	11125456	11126097
chrI	11126270	11127320
chrI	11127491	11127851
chrI	11130815	11132190
chrI	11135459	11138446
chrI	11159502	11159781
chrI	11163697	11165527
chrI	11166137	11167939
chrI	11169651	11170304
chrI	11182276	11182829
chrI	11183243	11185884
chrI	11186762	11188823
chrI	11193497	11195686
chrI	11195929	11197565
chrI	11197772	11199088
chrI	11199983	11201143
chrI	11201528	11205995
chrI	11206803	11208814
chrI	11208931	11210201
chrI	11215442	11215755
chrI	11216196	11217769
chrI	11219651	11220671
chrI	11221884	11222688
chrI	11222922	11223868
chrI	11224571	11225577
chrI	11228845	11229074
chrI	11233807	11234189
chrI	11238745	11238965
chrI	11256604	11257707
chrI	11258048	11261996
chrI	11262211	11262973
chrI	11273634	11276344
chrI	11276559	11277682
chrI	11278319	11279067
chrI	11280542	11283516
chrI	11284069	11284708
chrI	11284920	11285996
chrI	11287294	11288941
chrI	11289004	11293543
chrI	11293640	11294037
chrI	11311159	11311459
chrI	11312673	11313320
chrI	11315714	11317189
chrI	11321261	11323656
chrI	11325617	11326992
chrI	11328649	11331150
chrI	11331221	11333587
chrI	11335182	11335813
chrI	11357410	11357639
chrI	11363202	11363761
chrI	11364037	11368794
chrI	11369536	11372032
chrI	11372105	11373603
chrI	11376988	11377958
chrI	11379915	11385802
chrI	11385890	11400330
chrI	11400428	11402477
chrI	11406616	11408635
chrI	11408745	11409101
chrI	11416563	11416866
chrI	11417072	11417795
chrI	11427776	11427975
chrI	11479983	11481680
chrI	11485548	11488526
chrI	11497867	11498109
chrI	11502755	11503087
chrI	11503561	11503780
chrI	11504029	11504351
chrI	11504749	11506953
chrI	11517182	11518266
chrI	11518555	11519957
chrI	11520140	11521592
chrI	11521703	11522727
chrI	11524600	11528313
chrI	11529318	11530570
chrI	11530962	11534803
chrI	11536218	11538181
chrI	11541492	11541918
chrI	11545611	11548061
chrI	11549229	11549462
chrI	11550516	11551098
chrI	11552813	11553766
chrI	11554431	11555980
chrI	11556792	11557840
chrI	11571434	11572048
chrI	11576911	11578139
chrI	11578264	11579885
chrI	11580524	11580967
chrI	11581940	11582593
chrI	11583597	11586928
chrI	11592234	11592863
chrI	11593040	11593792
chrI	11594741	11596193
chrI	11596353	11606064
chrI	11608925	11609685
chrI	11610916	11614058
chrI	11615110	11615891
chrI	11627842	11628946
chrI	11649212	11650199
chrI	11655508	11658435
chrI	11658638	11659487
chrI	11659558	11661570
chrI	11661646	11663925
chrI	11664777	11665248
chrI	11665965	11666906
chrI	11667295	11669172
chrI	11669257	11669431
chrI	11669757	11671724
chrI	11671908	11672461
chrI	11672764	11673615
chrI	11674296	11674744
chrI	11674901	11675161
chrI	11675978	11676385
chrI	11676783	11679394
chrI	11681303	11681774
chrI	11682818	11683680
chrI	11686998	11687781
chrI	11689499	11690029
chrI	11691262	11692634
chrI	11693528	11694355
chrI	11728710	11729138
chrI	11745145	11747339
chrI	11763039	11763577
chrI	11763777	11764288
chrI	11778660	11779738
chrI	11780460	11782797
chrI	11782955	11786760
chrI	11792265	11793734
chrI	11793788	11794607
chrI	11798759	11799144
chrI	11801397	11801720
chrI	11802694	11804288
chrI	11825543	11826032
chrI	11837074	11837913
chrI	11838477	11838701
chrI	11838800	11839080
chrI	11839252	11839883
chrI	11840392	11841077
chrI	11841184	11841359
chrI	11841526	11842062
chrI	11842163	11843194
chrI	11843428	11843714
chrI	11843864	11844333
chrI	11861101	11862061
chrI	11867922	11868133
chrI	11869865	11875536
chrI	11875823	11876459
chrI	11876639	11876854
chrI	11876955	11877468
chrI	11896363	11897458
chrI	11903402	11903689
chrI	11905539	11906466
chrI	11908986	11909320
chrI	11909401	11911983
chrI	11912140	11912489
chrI	11929799	11932443
chrI	11933768	11935241
chrI	11937003	11937812
chrI	11939700	11940590
chrI	11945908	11947643
chrI	11949593	11950037
chrI	11950604	11951304
chrI	11951690	11953085
chrI	11964639	11965529
chrI	11965659	11966361
chrI	11974985	11975554
chrI	11976687	11979017
chrI	11986999	11987845
chrI	11995494	11997167
chrI	11997669	11998041
chrI	11998648	11999942
chrI	12001251	12002469
chrI	12004863	12005445
chrI	12006547	12006750
chrI	12008141	12008398
chrI	12009758	12010001
chrI	12038907	12041899
chrI	12042263	12043150
chrI	12043216	12045541
chrI	12045607	12047296
chrI	12047449	12048186
chrI	12048794	12049401
chrI	12054734	12055812
chrI	12060019	12060518
chrI	12065189	12067170
chrI	12068501	12069097
chrI	12070081	12070774
chrI	12071118	12072666
chrI	12078765	12079040
chrI	12105862	12106599
chrI	12134443	12134757
chrI	12135195	12135398
chrI	12141571	12141896
chrI	12142267	12142540
chrI	12142845	12143067
chrI	12144228	12145513
chrI	12149246	12150510
chrI	12163061	12163347
chrI	12164566	12165135
chrI	12168536	12169491
chrI	12173518	12174248
chrI	12177862	12178677
chrI	12179220	12179786
chrI	12183050	12185163
chrI	12185290	12185563
chrI	12185658	12185997
chrI	12189070	12189899
chrI	12191273	12191628
chrI	12194162	12194536
chrI	12197945	12198975
chrI	12199204	12199711
chrI	12205310	12205800
chrI	12206542	12207447
chrI	12209180	12210004
chrI	12211786	12215484
chrI	12215577	12216067
chrI	12218150	12218368
chrI	12223491	12224701
chrI	12225024	12226779
chrI	12227177	12227455
chrI	12228316	12228671
chrI	12228952	12229514
chrI	12285432	12286106
chrI	12286207	12287200
chrI	12287938	12288711
chrI	12289391	12289776
chrI	12324494	12325175
chrI	12343212	12343925
chrI	12465440	12465667
chrI	12478792	12481341
chrI	12483650	12483879
chrI	12484721	12485254
chrI	12485416	12486200
chrI	12486331	12487158
chrI	12487531	12488865
chrI	12489210	12489470
chrI	12489545	12490339
chrI	12490438	12490787
chrI	12490953	12492106
chrI	12492241	12493029
chrI	12493246	12494365
chrI	12494585	12496922
chrI	12507653	12508691
chrI	12509675	12510178
chrI	12510617	12512257
chrI	12512415	12515809
chrI	12516476	12517951
chrI	12518004	12520932
chrI	12521887	12523042
chrI	12523159	12530802
chrI	12530966	12531751
chrI	12531905	12532697
chrI	12533744	12537874
chrI	12544127	12552293
chrI	12552848	12553694
chrI	12561913	12563651
chrI	12563845	12565725
chrI	12565915	12567550
[truncated: 11,699 more rows]

## Sheet: LIN-13 IDR peaks
chromosome	start	end
chrI	1	474
chrI	1932	2437
chrI	3308	4839
chrI	7651	8773
chrI	9147	9518
chrI	10085	11627
chrI	12324	14117
chrI	14360	16277
chrI	16697	17382
chrI	21814	22522
chrI	24341	24733
chrI	27055	27536
chrI	28038	28281
chrI	33651	39309
chrI	39498	43715
chrI	46298	47353
chrI	50249	52707
chrI	52831	53395
chrI	54577	55227
chrI	55418	55946
chrI	56050	56616
chrI	65083	66613
chrI	67395	68155
chrI	69871	71067
chrI	71176	71976
chrI	77870	78264
chrI	80281	81102
chrI	81185	81444
chrI	82118	82400
chrI	82796	83007
chrI	87528	88473
chrI	90437	91939
chrI	92119	92623
chrI	92720	93415
chrI	94982	95318
chrI	95843	96764
chrI	97967	98331
chrI	99664	100338
chrI	107781	109151
chrI	110378	110891
chrI	112773	115874
chrI	116109	116699
chrI	122955	123924
chrI	126771	127243
chrI	128147	128733
chrI	134605	135260
chrI	136378	137203
chrI	137443	137909
chrI	156030	156798
chrI	160075	160945
chrI	166009	167486
chrI	168037	168324
chrI	171239	172504
chrI	178432	180397
chrI	182848	183256
chrI	184807	185492
chrI	196836	197120
chrI	201735	202537
chrI	205540	206278
chrI	210416	210895
chrI	211025	211664
chrI	215483	216267
chrI	217552	218272
chrI	218769	223357
chrI	226697	227609
chrI	230379	230921
chrI	231755	232231
chrI	232345	232955
chrI	237331	239239
chrI	247427	249027
chrI	249143	249876
chrI	250312	251379
chrI	251470	252396
chrI	254277	255923
chrI	258302	259127
chrI	260171	262795
chrI	262935	264257
chrI	267603	267890
chrI	276267	276529
chrI	276611	278686
chrI	278842	282693
chrI	283733	284335
chrI	284420	285960
chrI	286114	286422
chrI	286491	287897
chrI	289051	289334
chrI	290695	291011
chrI	301266	301578
chrI	304097	304521
chrI	305552	307205
chrI	307719	308279
chrI	308437	310252
chrI	310375	311150
chrI	315049	316440
chrI	318033	318654
chrI	323418	323785
chrI	328410	328694
chrI	332595	333946
chrI	334582	335892
chrI	342077	343345
chrI	343484	343929
chrI	344450	344824
chrI	348314	348624
chrI	349227	350257
chrI	352385	352602
chrI	352899	357143
chrI	358629	360549
chrI	361606	362161
chrI	363956	364548
chrI	366156	366545
chrI	367161	367632
chrI	368206	370755
chrI	372534	372869
chrI	373114	373541
chrI	377270	379371
chrI	382005	382897
chrI	385494	385760
chrI	388845	390314
chrI	391873	392297
chrI	392597	393093
chrI	393150	398270
chrI	398394	398660
chrI	399332	400135
chrI	402463	403435
chrI	404263	404667
chrI	408953	409369
chrI	412641	414699
chrI	415624	416620
chrI	417547	417921
chrI	418527	421504
chrI	432036	432313
chrI	436076	436424
chrI	442277	443810
chrI	447331	448185
chrI	448696	449445
chrI	458717	459015
chrI	459172	459631
chrI	461511	462156
chrI	462651	465271
chrI	465333	469043
chrI	469335	470442
chrI	476284	477300
chrI	477403	477763
chrI	477854	478144
chrI	478793	481008
chrI	481078	482673
chrI	482962	483973
chrI	484172	488674
chrI	489099	493163
chrI	493598	496089
chrI	496264	496782
chrI	496839	498168
chrI	498557	498828
chrI	500260	501527
chrI	501727	503223
chrI	504550	504863
chrI	505123	505363
chrI	506206	506499
chrI	509091	511040
chrI	516107	518917
chrI	519056	520170
chrI	520244	521521
chrI	524660	525714
chrI	533164	534459
chrI	535286	535631
chrI	536614	537254
chrI	541996	546383
chrI	546682	550449
chrI	550991	551778
chrI	556095	556545
chrI	557659	558292
chrI	560037	561487
chrI	564152	564528
chrI	565481	565906
chrI	568017	568265
chrI	575977	576459
chrI	584681	584947
chrI	585795	586792
chrI	592627	593301
chrI	596624	597466
chrI	604663	604972
chrI	605226	605723
chrI	606248	611459
chrI	611864	612273
chrI	612469	618585
chrI	621864	623971
chrI	624041	631279
chrI	632968	634172
chrI	636551	637163
chrI	637517	642932
chrI	642988	655680
chrI	655954	656361
chrI	657889	658142
chrI	659581	660284
chrI	662056	662509
chrI	663054	666733
chrI	667113	667553
chrI	667736	668556
chrI	668947	670346
chrI	670496	673109
chrI	673720	674004
chrI	674344	674827
chrI	675632	675958
chrI	677012	678490
chrI	679391	682318
chrI	682378	683387
chrI	686502	688053
chrI	688498	690085
chrI	690618	701428
chrI	701595	703123
chrI	703673	705007
chrI	706918	707346
chrI	707935	708265
chrI	710972	712027
chrI	713740	715207
chrI	715835	716237
chrI	716304	721465
chrI	721520	722452
chrI	724524	725346
chrI	725569	726309
chrI	726581	727046
chrI	729967	733002
chrI	734980	735849
chrI	735923	736448
chrI	736662	739178
chrI	739815	740152
chrI	740921	741315
chrI	744779	745318
chrI	749174	749922
chrI	753306	754898
chrI	756124	756689
chrI	759775	760618
chrI	761286	766593
chrI	766849	770530
chrI	772019	773297
chrI	776327	778398
chrI	778895	780007
chrI	780371	781221
chrI	781502	782633
chrI	782959	783735
chrI	784306	784810
chrI	785319	786807
chrI	787419	789645
chrI	790541	791543
chrI	792652	793549
chrI	796127	796427
chrI	797334	798495
chrI	798956	799904
chrI	800682	801439
chrI	803290	804448
chrI	806886	807816
chrI	809559	810329
chrI	813862	814259
chrI	821093	821452
chrI	821535	822221
chrI	823099	823600
chrI	823733	826890
chrI	830343	830987
chrI	833217	834292
chrI	835192	835630
chrI	836557	837449
chrI	840745	841313
chrI	842941	843948
chrI	844156	845729
chrI	846830	847267
chrI	847501	853529
chrI	860325	860766
chrI	861269	861706
chrI	862417	863036
chrI	865668	866714
chrI	871641	872220
chrI	872614	874803
chrI	875866	880473
chrI	880891	883956
chrI	886431	892224
chrI	894716	895284
chrI	901719	902810
chrI	903355	904367
chrI	904644	906054
chrI	906889	908592
chrI	908699	914036
chrI	915094	915408
chrI	915484	915824
chrI	916593	917460
chrI	918225	918638
chrI	919835	926665
chrI	926731	927679
chrI	928112	929518
chrI	929998	931299
chrI	933390	934821
chrI	935124	936860
chrI	936925	938432
chrI	939515	939888
chrI	941760	942082
chrI	945920	947586
chrI	947666	949069
chrI	949264	950946
chrI	951657	952269
chrI	957193	958080
chrI	960444	961089
chrI	967021	967612
chrI	969813	970191
chrI	971831	972588
chrI	972987	974210
chrI	976098	976427
chrI	977751	978113
chrI	979802	980106
chrI	980731	981595
chrI	983552	984176
chrI	984285	984565
chrI	986439	987196
chrI	991264	991619
chrI	991797	993064
chrI	993380	995010
chrI	995071	995703
chrI	995899	997870
chrI	998472	999632
chrI	1001231	1001600
chrI	1001994	1002280
chrI	1003038	1003676
chrI	1004013	1004800
chrI	1006060	1007079
chrI	1007183	1012300
chrI	1012546	1013551
chrI	1014232	1019771
chrI	1019888	1020393
chrI	1020621	1020924
chrI	1024246	1026256
chrI	1029727	1030492
chrI	1030676	1031386
chrI	1031762	1032089
chrI	1033318	1034588
chrI	1037701	1039092
chrI	1040948	1041263
chrI	1042574	1042850
chrI	1045384	1045969
chrI	1046286	1047024
chrI	1047446	1049399
chrI	1049545	1054301
chrI	1054370	1054796
chrI	1056483	1056929
chrI	1057884	1059097
chrI	1059229	1065955
chrI	1066845	1070745
chrI	1070914	1071495
chrI	1072071	1072696
chrI	1073118	1077665
chrI	1079380	1079806
chrI	1082365	1082705
chrI	1085613	1086570
chrI	1086630	1087360
chrI	1088429	1091377
chrI	1091663	1092235
chrI	1095121	1095483
chrI	1095658	1097237
chrI	1097317	1098422
chrI	1098844	1101482
chrI	1102342	1102639
chrI	1102709	1103142
chrI	1103702	1104075
chrI	1104456	1104752
chrI	1105569	1108855
chrI	1108962	1109760
chrI	1114316	1114642
chrI	1116011	1118311
chrI	1120735	1125174
chrI	1127085	1127741
chrI	1127946	1128437
chrI	1128739	1131497
chrI	1131603	1133355
chrI	1133429	1135321
chrI	1135452	1136931
chrI	1137286	1137548
chrI	1138429	1139146
chrI	1139726	1140468
chrI	1142525	1142918
chrI	1146465	1147088
chrI	1147222	1147764
chrI	1151171	1152209
chrI	1153009	1153617
chrI	1153999	1155631
chrI	1156000	1156359
chrI	1156984	1158696
chrI	1158976	1160501
chrI	1160806	1162797
chrI	1162948	1169145
chrI	1169458	1170329
chrI	1170625	1171837
chrI	1174334	1175193
chrI	1175755	1176081
chrI	1177047	1177483
chrI	1179511	1179926
chrI	1181458	1182131
chrI	1183904	1184832
chrI	1194623	1195012
chrI	1197642	1198754
chrI	1199187	1199763
chrI	1206432	1206759
chrI	1206920	1207486
chrI	1209144	1210696
chrI	1210826	1211377
chrI	1212566	1214908
chrI	1216014	1219852
chrI	1221035	1222833
chrI	1223975	1225764
chrI	1225837	1231784
chrI	1231909	1232630
chrI	1234579	1235015
chrI	1239813	1240135
chrI	1241097	1242107
chrI	1245260	1246259
chrI	1248479	1248811
chrI	1249225	1249656
chrI	1249762	1250716
chrI	1251392	1251941
chrI	1254799	1256101
chrI	1259762	1261003
chrI	1262952	1266523
chrI	1266757	1267869
chrI	1267966	1268729
chrI	1269158	1269675
chrI	1270814	1271628
chrI	1272092	1272680
chrI	1276755	1277178
chrI	1277505	1281942
chrI	1282197	1283436
chrI	1283543	1285320
chrI	1285406	1287446
chrI	1288620	1289386
chrI	1291536	1291868
chrI	1292349	1292675
chrI	1293533	1294254
chrI	1295406	1301744
chrI	1303430	1305573
chrI	1305630	1306585
chrI	1309703	1311308
chrI	1311735	1314660
chrI	1316966	1318226
chrI	1318296	1319375
chrI	1320387	1322257
chrI	1322466	1324820
chrI	1327847	1328638
chrI	1332729	1340493
chrI	1341394	1343337
chrI	1344461	1345300
chrI	1345381	1346937
chrI	1347016	1347977
chrI	1348195	1348573
chrI	1349130	1349626
chrI	1351462	1352544
chrI	1354398	1354839
chrI	1356595	1357129
chrI	1357227	1357895
chrI	1358578	1359709
chrI	1359866	1360375
chrI	1360548	1361598
chrI	1362022	1364006
chrI	1364409	1369946
chrI	1370003	1374864
chrI	1375045	1375417
chrI	1375946	1376660
chrI	1376731	1377095
chrI	1377555	1378191
chrI	1381293	1381507
chrI	1382675	1383121
chrI	1383686	1384719
chrI	1388373	1388761
chrI	1388908	1389337
chrI	1392588	1393125
chrI	1394297	1394719
chrI	1399476	1400037
chrI	1400134	1400706
chrI	1401564	1402155
chrI	1403145	1406164
chrI	1406454	1408625
chrI	1409495	1410373
chrI	1411071	1414239
chrI	1415857	1416423
chrI	1419277	1419783
chrI	1419849	1420589
chrI	1424975	1427070
chrI	1429265	1431285
chrI	1434295	1434943
chrI	1435096	1435927
chrI	1437818	1438173
chrI	1439938	1440367
chrI	1443606	1449693
chrI	1450123	1451111
chrI	1452030	1452823
chrI	1452954	1454211
chrI	1454969	1456475
chrI	1458017	1458228
chrI	1458517	1463356
chrI	1463448	1464050
chrI	1468195	1468584
chrI	1469006	1469271
chrI	1475690	1476620
chrI	1476971	1490402
chrI	1493236	1494620
chrI	1497792	1498134
chrI	1503609	1504351
chrI	1504939	1505154
chrI	1506024	1506366
chrI	1508457	1508944
chrI	1510072	1510665
chrI	1514479	1514815
chrI	1515312	1515641
chrI	1519401	1520014
chrI	1521276	1521707
chrI	1521802	1522388
chrI	1522789	1523132
chrI	1524725	1525714
chrI	1526779	1527141
chrI	1529194	1529798
chrI	1532301	1533096
chrI	1535736	1536294
chrI	1540432	1541131
chrI	1541297	1544977
chrI	1545333	1546819
chrI	1547547	1549275
chrI	1552885	1553229
chrI	1553739	1555126
chrI	1555230	1555720
chrI	1557410	1559592
chrI	1560095	1560483
chrI	1562497	1562945
chrI	1563450	1565379
chrI	1566939	1567400
chrI	1569282	1569845
chrI	1569927	1570636
chrI	1573182	1573664
chrI	1575403	1576098
chrI	1576764	1577249
chrI	1579406	1579890
chrI	1580043	1584395
chrI	1586510	1586962
chrI	1590056	1590294
chrI	1591272	1592113
chrI	1593579	1594904
chrI	1595559	1599242
chrI	1599538	1600020
chrI	1609973	1610380
chrI	1610484	1614242
chrI	1614378	1614810
chrI	1615654	1615992
chrI	1618303	1624201
chrI	1624689	1625897
chrI	1625958	1629186
chrI	1629548	1630021
chrI	1630111	1630483
chrI	1632546	1632954
chrI	1633167	1634769
chrI	1634978	1635375
chrI	1637538	1638780
chrI	1639235	1641685
chrI	1642445	1644039
chrI	1644772	1645930
chrI	1646163	1648470
chrI	1648685	1650436
chrI	1655952	1656201
chrI	1660446	1663368
chrI	1665300	1666354
chrI	1666846	1667554
chrI	1667620	1668480
chrI	1668944	1674094
chrI	1675298	1676400
chrI	1676527	1676994
chrI	1678066	1678861
chrI	1679499	1679833
chrI	1680465	1681003
chrI	1681162	1681594
chrI	1681964	1682618
chrI	1683510	1683940
chrI	1684036	1684907
chrI	1685448	1686585
chrI	1686675	1688317
chrI	1689022	1689494
chrI	1690472	1691761
chrI	1692534	1693603
chrI	1694814	1700066
chrI	1700122	1700771
chrI	1701054	1701501
chrI	1701651	1702205
chrI	1706634	1706894
chrI	1711124	1711319
chrI	1712313	1712655
chrI	1715560	1716307
chrI	1716433	1717831
chrI	1718355	1721901
chrI	1722093	1722988
chrI	1725248	1726094
chrI	1727518	1727998
chrI	1731357	1732636
chrI	1738841	1741390
chrI	1741640	1742320
chrI	1743049	1743781
chrI	1744043	1744356
chrI	1744897	1745478
chrI	1746141	1748209
chrI	1751920	1752514
chrI	1755382	1759004
chrI	1760413	1762689
chrI	1773271	1775124
chrI	1775245	1776293
chrI	1777232	1778615
chrI	1778687	1779523
chrI	1779915	1781032
chrI	1781569	1782237
chrI	1790189	1790494
chrI	1791689	1793386
chrI	1793444	1794364
chrI	1794566	1794905
chrI	1795007	1795313
chrI	1795478	1795933
chrI	1796477	1797706
chrI	1799912	1800584
chrI	1802920	1803302
chrI	1809476	1811079
chrI	1813083	1813938
chrI	1814091	1814472
chrI	1814614	1818399
chrI	1818564	1819735
chrI	1820119	1821351
chrI	1821511	1823520
chrI	1824547	1825159
chrI	1825775	1826425
chrI	1828333	1828819
chrI	1831264	1831538
chrI	1832601	1833049
chrI	1834535	1842546
chrI	1843601	1844476
chrI	1844569	1846550
chrI	1846615	1848429
chrI	1848510	1849532
chrI	1849623	1849963
chrI	1851153	1851727
chrI	1852026	1853352
chrI	1858803	1859088
chrI	1862351	1863257
chrI	1863320	1863776
chrI	1872351	1872802
chrI	1873608	1874233
chrI	1876457	1879128
chrI	1883677	1884799
chrI	1886831	1887250
chrI	1888546	1889375
chrI	1890176	1890636
chrI	1890769	1891403
chrI	1891543	1895344
chrI	1895754	1896370
chrI	1899587	1900085
chrI	1900516	1900870
chrI	1901291	1901943
chrI	1904059	1904420
chrI	1910900	1911318
chrI	1911616	1917302
chrI	1919135	1922326
chrI	1926427	1927377
chrI	1930691	1931080
chrI	1931348	1931732
chrI	1931967	1932288
chrI	1932519	1932987
chrI	1933806	1934177
chrI	1935177	1938339
chrI	1939081	1939611
chrI	1945219	1945514
chrI	1945786	1946102
chrI	1954235	1954574
chrI	1957152	1957551
chrI	1958405	1958751
chrI	1962647	1962978
chrI	1968529	1969265
chrI	1969376	1970598
chrI	1970911	1975078
chrI	1977428	1979206
chrI	1986155	1986476
chrI	1987096	1990141
chrI	2001079	2003099
chrI	2003154	2003706
chrI	2003821	2004368
chrI	2005111	2010325
chrI	2010386	2012070
chrI	2012214	2013230
chrI	2014192	2014613
chrI	2014759	2015459
chrI	2016157	2017707
chrI	2017811	2021549
chrI	2021659	2026291
chrI	2029935	2036991
chrI	2039173	2040716
chrI	2040933	2041829
chrI	2042262	2043669
chrI	2043724	2045472
chrI	2046413	2047928
chrI	2048690	2050325
chrI	2054602	2056905
chrI	2061216	2062913
chrI	2063970	2064187
chrI	2066146	2068234
chrI	2068947	2069827
chrI	2070329	2071023
chrI	2074489	2074876
chrI	2076660	2079929
chrI	2080237	2084474
chrI	2084751	2085462
chrI	2085620	2087273
chrI	2087975	2088269
chrI	2088617	2089150
chrI	2089398	2089696
chrI	2090797	2091931
chrI	2092373	2097515
chrI	2099953	2100748
chrI	2108013	2108916
chrI	2110962	2111421
chrI	2112925	2113517
chrI	2116510	2118550
chrI	2119377	2119986
chrI	2120608	2121535
chrI	2124222	2124457
chrI	2124573	2124902
chrI	2126502	2127798
chrI	2128897	2129389
chrI	2129456	2130240
chrI	2141685	2142200
chrI	2143063	2145999
chrI	2146641	2146899
chrI	2153958	2154769
chrI	2154929	2156889
chrI	2159310	2160114
chrI	2161448	2162015
chrI	2167924	2168432
chrI	2170084	2170771
chrI	2171023	2171414
chrI	2171485	2172131
chrI	2176599	2177035
chrI	2190256	2191082
chrI	2200742	2202436
chrI	2203124	2203957
chrI	2204702	2206793
chrI	2210293	2210911
chrI	2219019	2219353
chrI	2221076	2221400
chrI	2223415	2223792
chrI	2224219	2225676
chrI	2234370	2234738
chrI	2235068	2235552
chrI	2247392	2248640
chrI	2248718	2251553
chrI	2252261	2253029
chrI	2253084	2256216
chrI	2265351	2270289
chrI	2270549	2271714
chrI	2272221	2272931
chrI	2273029	2274821
chrI	2275149	2275570
chrI	2275978	2276414
chrI	2278946	2280818
chrI	2282023	2282429
chrI	2282533	2282927
chrI	2288939	2289226
chrI	2290609	2291416
chrI	2291551	2293728
chrI	2294133	2295781
chrI	2295846	2296699
chrI	2297331	2297899
chrI	2299412	2300483
chrI	2306774	2307049
chrI	2309102	2309542
chrI	2311132	2312039
chrI	2315950	2316431
chrI	2318708	2319138
chrI	2321816	2324023
chrI	2324399	2325427
chrI	2328077	2328612
chrI	2329304	2330041
chrI	2330100	2330933
chrI	2331341	2339003
chrI	2339102	2339437
chrI	2339683	2340412
chrI	2342837	2343326
chrI	2354884	2355368
chrI	2358413	2359922
chrI	2360015	2361451
chrI	2362446	2365532
chrI	2369476	2370918
chrI	2373467	2374226
chrI	2374711	2374968
chrI	2375434	2378480
chrI	2379320	2381815
chrI	2382934	2386169
chrI	2386561	2386986
chrI	2387206	2387724
chrI	2388171	2390216
chrI	2390738	2391816
chrI	2393120	2394220
chrI	2401481	2401832
chrI	2403383	2405264
chrI	2405451	2405789
chrI	2406469	2406883
chrI	2407077	2409439
chrI	2409988	2410347
chrI	2410452	2410897
chrI	2411389	2412543
chrI	2413130	2414958
chrI	2415022	2416611
chrI	2416750	2418520
chrI	2418573	2420048
chrI	2421535	2422729
chrI	2423114	2424070
chrI	2424124	2425027
chrI	2427702	2428492
chrI	2431435	2432561
chrI	2433583	2433855
chrI	2435574	2436716
chrI	2452029	2453036
chrI	2453234	2456131
chrI	2456268	2457486
chrI	2462695	2463256
chrI	2463418	2464597
chrI	2465507	2465929
chrI	2477746	2478166
chrI	2478810	2479070
chrI	2485397	2486001
chrI	2486102	2486652
chrI	2487771	2488356
chrI	2488466	2488893
chrI	2489032	2490152
chrI	2493330	2494364
chrI	2495108	2496826
chrI	2502573	2502999
chrI	2503185	2503490
chrI	2506263	2507134
chrI	2508372	2509177
chrI	2509884	2510134
chrI	2512910	2513294
chrI	2514065	2516239
chrI	2517951	2518489
chrI	2519263	2520471
chrI	2521481	2521753
chrI	2522371	2523443
chrI	2524480	2527193
chrI	2527471	2527773
chrI	2528764	2529028
chrI	2530461	2532911
chrI	2534070	2534932
chrI	2535072	2535645
chrI	2538203	2538975
chrI	2539352	2539927
chrI	2554011	2554729
chrI	2567997	2568630
chrI	2572083	2572338
chrI	2577156	2578862
chrI	2578979	2579460
chrI	2579532	2581050
chrI	2584578	2590591
chrI	2591140	2591694
chrI	2595397	2595790
chrI	2598529	2599758
chrI	2600272	2601056
chrI	2602109	2602554
chrI	2604023	2605632
chrI	2613349	2614081
chrI	2614374	2614908
chrI	2615848	2619348
chrI	2619472	2620164
chrI	2620318	2620704
chrI	2621887	2622156
chrI	2622651	2623097
chrI	2627472	2627945
chrI	2631703	2633133
chrI	2633988	2635377
chrI	2636097	2636564
chrI	2639422	2639992
chrI	2643770	2644111
chrI	2644296	2644577
chrI	2647099	2650003
chrI	2652421	2652871
chrI	2652943	2653353
chrI	2654155	2655343
chrI	2657318	2657992
chrI	2659219	2659645
chrI	2660842	2661136
chrI	2663072	2663871
chrI	2664849	2665094
chrI	2665283	2665852
chrI	2666196	2666581
chrI	2667268	2668116
chrI	2673213	2673442
chrI	2680951	2682832
chrI	2682991	2683827
chrI	2684329	2684848
chrI	2686870	2690586
chrI	2695330	2695783
chrI	2703795	2704710
chrI	2705447	2707396
chrI	2709806	2710226
chrI	2710280	2712682
chrI	2713487	2713804
chrI	2714627	2715728
chrI	2716824	2717362
chrI	2719647	2719913
chrI	2721623	2721920
chrI	2722187	2722640
chrI	2722861	2723429
chrI	2724337	2724983
chrI	2726639	2726846
chrI	2728428	2729499
chrI	2729814	2732600
chrI	2733332	2734156
chrI	2734298	2735241
chrI	2736209	2737433
chrI	2749246	2749568
chrI	2749650	2750003
chrI	2751797	2752114
chrI	2752507	2754006
chrI	2754256	2755334
chrI	2758576	2758917
chrI	2759841	2762701
chrI	2762786	2763570
chrI	2769263	2769717
chrI	2772367	2774090
chrI	2776113	2778748
chrI	2781916	2782388
chrI	2789159	2789503
chrI	2790815	2791647
chrI	2800023	2800635
chrI	2800862	2801567
chrI	2802997	2803611
chrI	2813207	2813641
chrI	2813779	2814165
chrI	2822465	2824183
chrI	2826387	2826945
chrI	2827271	2827692
chrI	2829495	2829926
chrI	2830081	2832861
chrI	2833283	2833994
chrI	2834707	2836363
chrI	2840184	2841374
chrI	2847065	2848014
chrI	2848533	2849241
chrI	2851111	2851625
chrI	2852649	2853186
chrI	2855287	2855724
chrI	2856252	2856959
chrI	2857542	2858493
chrI	2858595	2862444
chrI	2863469	2864492
chrI	2864774	2871087
chrI	2871341	2871684
chrI	2872919	2873917
chrI	2875744	2876922
chrI	2879487	2880781
chrI	2888333	2889184
chrI	2895016	2895451
chrI	2900975	2901224
chrI	2902364	2902745
chrI	2903027	2903492
chrI	2903598	2904455
chrI	2906526	2907232
chrI	2907486	2908631
chrI	2909918	2910562
chrI	2914515	2915034
chrI	2915276	2915743
chrI	2916030	2917622
chrI	2919631	2920736
chrI	2921117	2921403
chrI	2924564	2925291
chrI	2927776	2928719
chrI	2929514	2929901
chrI	2932066	2932285
chrI	2932873	2933400
chrI	2933506	2933859
chrI	2935533	2937884
chrI	2943148	2943651
chrI	2944289	2945253
chrI	2946205	2946903
chrI	2947856	2948221
chrI	2948997	2951264
chrI	2951577	2953045
chrI	2955887	2956719
chrI	2956862	2957381
chrI	2958652	2960968
chrI	2962376	2963244
chrI	2963521	2963978
chrI	2969699	2970304
chrI	2972214	2972532
chrI	2973768	2974225
chrI	2982021	2982264
chrI	2982886	2983155
chrI	2983721	2984104
chrI	2984169	2984917
chrI	2985099	2985685
chrI	2990902	2991321
chrI	2991646	2992078
chrI	2995780	2996614
chrI	2998423	2999197
chrI	2999265	3001236
chrI	3003070	3003543
chrI	3007907	3008361
chrI	3009277	3010613
chrI	3016193	3016609
chrI	3017684	3018005
chrI	3027001	3027418
chrI	3028822	3029664
chrI	3030469	3030732
chrI	3032814	3033085
chrI	3033627	3036283
chrI	3037879	3040563
chrI	3040705	3041483
chrI	3043248	3044503
chrI	3045095	3045755
chrI	3047812	3049573
chrI	3049739	3050463
chrI	3052247	3052743
chrI	3052988	3053227
chrI	3053888	3054112
chrI	3058884	3059508
chrI	3060904	3065349
chrI	3066086	3066397
chrI	3070054	3070382
chrI	3074169	3074733
chrI	3077120	3077592
chrI	3079287	3079514
chrI	3079708	3080279
chrI	3085282	3085891
chrI	3086094	3086601
chrI	3096142	3096474
chrI	3098162	3098928
chrI	3105507	3106750
chrI	3111495	3111778
chrI	3112280	3112570
chrI	3112666	3113012
chrI	3116996	3117388
chrI	3117918	3118396
chrI	3120752	3121120
chrI	3128326	3128559
chrI	3128851	3129092
chrI	3129771	3130045
chrI	3134749	3135012
chrI	3135145	3135582
chrI	3136387	3136928
chrI	3139958	3144479
chrI	3146500	3147130
chrI	3147797	3148097
chrI	3148883	3149141
chrI	3149553	3150086
chrI	3151179	3151746
chrI	3151985	3152885
chrI	3156716	3157137
chrI	3157417	3157940
chrI	3162447	3162954
chrI	3166995	3168211
chrI	3170075	3170857
chrI	3171593	3172498
chrI	3172712	3173226
chrI	3176459	3176752
chrI	3183325	3183710
chrI	3184814	3185295
chrI	3188615	3189558
chrI	3190833	3191252
chrI	3191429	3192223
chrI	3195036	3195473
chrI	3198772	3199216
chrI	3205132	3206023
chrI	3207644	3210232
chrI	3210348	3210701
chrI	3212382	3213060
chrI	3218107	3218346
chrI	3218792	3219357
chrI	3220068	3220523
chrI	3220945	3221435
chrI	3221561	3221987
chrI	3227953	3228273
chrI	3238621	3238847
chrI	3242558	3244008
chrI	3245721	3249716
chrI	3254393	3254835
chrI	3255057	3255507
chrI	3259990	3260533
chrI	3261935	3264050
chrI	3264982	3265801
chrI	3266649	3266934
chrI	3269013	3269375
chrI	3269582	3270511
chrI	3275751	3276234
chrI	3276592	3277324
chrI	3278361	3279253
chrI	3281902	3282273
chrI	3282679	3283101
chrI	3283370	3284331
chrI	3286556	3287203
chrI	3287347	3288395
chrI	3290512	3291519
chrI	3291909	3293120
chrI	3293209	3294063
chrI	3296584	3297390
chrI	3297464	3298209
chrI	3299222	3299502
chrI	3309648	3310255
chrI	3310737	3311072
chrI	3313423	3314020
chrI	3314917	3315293
chrI	3316075	3316554
chrI	3316910	3317744
chrI	3318350	3318621
chrI	3318996	3319245
chrI	3331308	3331803
chrI	3333919	3335934
chrI	3336236	3337514
chrI	3337634	3340273
chrI	3343734	3344122
chrI	3345042	3345323
chrI	3347148	3347452
chrI	3349839	3351380
chrI	3351682	3352270
chrI	3352551	3353094
chrI	3358296	3359172
chrI	3362833	3363387
chrI	3363563	3367940
chrI	3368406	3368913
chrI	3371415	3371788
chrI	3371880	3372849
chrI	3373535	3374808
chrI	3374996	3377791
chrI	3380306	3381101
chrI	3381192	3381637
chrI	3381869	3382592
chrI	3383052	3383917
chrI	3389847	3394303
chrI	3396960	3397321
chrI	3399887	3400534
chrI	3401477	3401761
chrI	3404661	3405145
chrI	3408230	3409253
chrI	3409364	3409996
chrI	3412280	3412624
chrI	3413836	3414780
chrI	3416789	3417821
chrI	3422605	3423208
chrI	3427322	3430393
chrI	3430474	3433028
chrI	3438586	3439146
chrI	3440020	3441359
chrI	3441530	3441983
chrI	3442177	3442718
chrI	3446136	3446454
chrI	3451462	3451856
chrI	3455934	3457189
chrI	3457723	3458135
chrI	3458958	3459338
chrI	3459551	3460516
chrI	3460816	3461318
chrI	3461464	3461782
chrI	3462985	3463467
chrI	3464147	3464799
chrI	3466389	3466621
chrI	3466747	3467024
chrI	3467983	3468831
chrI	3468906	3469144
chrI	3473084	3474163
chrI	3475015	3475394
chrI	3478935	3479733
chrI	3479824	3480623
chrI	3481448	3481684
chrI	3484531	3487835
chrI	3495321	3495713
chrI	3500624	3501432
chrI	3501923	3502245
chrI	3505453	3506103
chrI	3506196	3508336
chrI	3510657	3511721
chrI	3511829	3512705
chrI	3514106	3514651
chrI	3515255	3515648
chrI	3516252	3516691
chrI	3517185	3517694
chrI	3518748	3519178
chrI	3520347	3520589
chrI	3522814	3523199
chrI	3523459	3523939
chrI	3525204	3525590
chrI	3525707	3526571
chrI	3526671	3527132
chrI	3529356	3529901
chrI	3535209	3536133
chrI	3536856	3539165
chrI	3539969	3541125
chrI	3546776	3547348
chrI	3547651	3548309
chrI	3552023	3552491
chrI	3552819	3553704
chrI	3554678	3555034
chrI	3557489	3558193
chrI	3558561	3559783
chrI	3560109	3560836
chrI	3561965	3564941
chrI	3565257	3565709
chrI	3566723	3567116
chrI	3567276	3567992
chrI	3584851	3585245
chrI	3600669	3601003
chrI	3601423	3601996
chrI	3605708	3606048
chrI	3608275	3608548
chrI	3610465	3610873
chrI	3611125	3611367
chrI	3612455	3612949
chrI	3613037	3613500
chrI	3613700	3613974
chrI	3614419	3614691
chrI	3617270	3617878
chrI	3619838	3620327
chrI	3624269	3624791
chrI	3626393	3626680
chrI	3627284	3628371
chrI	3636571	3636792
chrI	3637818	3638132
chrI	3638792	3639481
chrI	3643947	3644403
chrI	3644518	3645001
chrI	3656937	3657410
chrI	3662679	3663348
chrI	3664103	3666179
chrI	3680929	3683009
chrI	3684404	3684792
chrI	3686033	3686251
chrI	3690454	3690840
chrI	3691906	3692357
chrI	3692590	3693165
chrI	3693310	3693941
chrI	3697538	3698148
chrI	3700487	3700862
chrI	3704862	3705310
chrI	3705525	3705777
chrI	3706647	3707274
chrI	3707367	3707767
chrI	3708305	3708725
chrI	3709905	3710673
chrI	3713985	3714340
chrI	3721301	3722976
chrI	3723127	3723748
chrI	3726225	3726886
chrI	3733642	3734493
chrI	3740125	3740889
chrI	3741120	3741438
chrI	3742646	3743281
chrI	3744032	3744314
chrI	3748259	3748498
chrI	3752268	3752669
chrI	3753383	3753951
chrI	3754145	3755067
chrI	3755811	3756286
chrI	3756703	3757337
chrI	3761352	3761715
chrI	3762134	3762962
chrI	3763073	3766008
chrI	3770136	3770436
chrI	3780703	3780942
chrI	3781725	3781940
chrI	3783389	3783934
chrI	3784363	3784752
chrI	3787688	3787897
chrI	3792898	3793596
chrI	3793874	3794503
chrI	3794660	3795259
chrI	3796719	3797995
chrI	3798159	3798474
chrI	3806002	3806210
chrI	3806562	3807460
chrI	3817306	3817628
chrI	3817772	3817995
chrI	3823644	3823950
chrI	3824187	3825105
chrI	3826540	3826999
chrI	3827291	3827780
chrI	3829338	3829689
chrI	3834551	3835201
chrI	3842444	3843175
chrI	3853067	3853556
chrI	3854574	3855719
chrI	3856421	3856794
chrI	3858732	3859285
chrI	3860705	3861311
chrI	3862037	3862710
chrI	3865954	3866240
chrI	3866298	3867098
chrI	3870173	3870720
chrI	3871201	3872021
chrI	3873850	3874092
chrI	3885081	3885472
chrI	3888418	3889008
chrI	3907372	3907868
chrI	3908151	3908846
chrI	3910651	3912063
chrI	3917474	3917804
chrI	3919246	3920170
chrI	3931514	3932064
chrI	3934915	3935304
chrI	3943795	3944127
chrI	3976264	3976678
chrI	3977488	3977675
chrI	3979939	3981348
chrI	3982275	3982629
chrI	3982734	3983092
chrI	3987146	3987891
chrI	3991621	3991897
chrI	3996902	3997257
chrI	4037466	4037728
chrI	4114531	4114752
chrI	4125201	4125784
chrI	4128485	4129113
chrI	4132198	4132451
chrI	4135326	4136309
chrI	4139304	4139603
chrI	4140898	4141348
chrI	4142622	4143257
chrI	4167699	4168430
chrI	4171741	4172387
chrI	4174896	4175157
chrI	4185157	4186403
chrI	4197879	4198113
chrI	4201277	4202037
chrI	4213084	4213675
chrI	4216093	4216342
chrI	4216542	4217106
chrI	4242475	4242695
chrI	4247476	4247778
chrI	4249496	4249701
chrI	4264729	4265170
chrI	4265800	4266197
chrI	4273961	4274392
chrI	4297494	4298161
chrI	4302284	4302528
chrI	4313227	4313522
chrI	4369916	4370214
chrI	4374927	4375820
chrI	4376110	4376311
chrI	4381769	4382622
chrI	4385288	4386324
chrI	4428134	4428435
chrI	4432094	4432521
chrI	4435275	4435659
chrI	4436771	4437227
chrI	4442997	4443315
chrI	4444367	4444573
chrI	4451024	4451269
chrI	4451912	4452274
chrI	4454921	4455448
chrI	4456797	4457472
chrI	4459701	4460585
chrI	4462812	4463414
chrI	4465609	4467416
chrI	4473940	4474291
chrI	4474661	4475419
chrI	4478122	4478631
chrI	4479291	4480023
chrI	4480459	4480768
chrI	4480828	4481111
chrI	4488121	4489835
chrI	4489967	4491005
chrI	4493607	4494523
chrI	4494649	4495788
chrI	4504055	4504406
chrI	4511156	4511389
chrI	4511471	4512067
chrI	4512419	4512712
chrI	4527316	4527746
chrI	4530917	4531118
chrI	4534926	4536510
chrI	4536849	4537504
chrI	4537625	4537850
chrI	4540341	4546353
chrI	4546504	4547788
chrI	4548068	4548548
chrI	4556684	4557453
chrI	4571673	4572080
chrI	4573013	4574809
chrI	4577262	4577523
chrI	4579077	4579672
chrI	4584727	4585007
chrI	4586740	4587419
chrI	4590526	4591498
chrI	4597417	4597824
chrI	4602940	4603153
chrI	4606837	4607142
chrI	4608287	4608823
chrI	4621575	4621940
chrI	4633595	4633790
chrI	4636588	4637028
chrI	4647132	4647368
chrI	4650649	4651180
chrI	4652302	4652697
chrI	4652989	4653428
chrI	4653557	4654349
chrI	4662269	4662743
chrI	4663247	4663710
chrI	4671828	4672427
chrI	4679806	4680074
chrI	4683651	4683968
chrI	4696074	4696310
chrI	4698855	4699098
chrI	4700598	4702197
chrI	4703513	4704280
chrI	4704336	4704591
chrI	4705906	4706528
chrI	4734034	4734607
chrI	4739202	4739533
chrI	4747307	4747869
chrI	4751373	4751971
chrI	4754948	4755518
chrI	4758236	4759071
chrI	4764776	4765121
chrI	4765355	4766332
chrI	4766986	4768186
chrI	4769161	4770113
chrI	4773023	4773357
chrI	4773445	4773836
chrI	4779179	4779997
chrI	4785451	4786046
chrI	4788464	4789198
chrI	4789881	4790557
chrI	4791595	4792089
chrI	4798771	4799102
chrI	4803485	4804659
chrI	4805369	4805553
chrI	4810159	4810423
chrI	4823944	4824811
chrI	4826813	4827164
chrI	4829849	4830033
chrI	4838912	4839290
chrI	4848443	4848988
chrI	4851107	4851493
chrI	4895563	4896073
chrI	4898381	4898634
chrI	4910143	4911782
chrI	4917516	4918293
chrI	4926449	4926698
chrI	4932125	4932462
chrI	4938471	4938756
chrI	4939803	4940115
chrI	4958511	4962336
chrI	4967564	4967785
chrI	4968331	4968844
chrI	4976846	4977590
chrI	4993696	4993950
chrI	4995557	4995828
chrI	5023497	5023797
chrI	5034643	5035295
chrI	5075267	5075541
chrI	5079042	5079467
chrI	5091239	5091498
chrI	5092300	5092669
chrI	5100951	5101483
chrI	5106063	5106338
chrI	5110141	5110689
chrI	5113827	5114042
chrI	5127422	5127779
chrI	5134182	5134711
chrI	5142373	5142876
chrI	5144393	5145804
chrI	5152564	5153934
chrI	5157084	5157914
chrI	5162366	5162612
chrI	5164917	5165137
chrI	5175594	5176601
chrI	5184929	5185222
chrI	5186331	5186759
chrI	5189653	5190145
chrI	5215497	5215815
chrI	5244183	5244400
chrI	5256519	5256844
chrI	5261625	5262081
chrI	5268558	5269084
chrI	5271017	5271332
chrI	5272047	5272389
chrI	5274188	5274488
chrI	5276549	5277036
chrI	5291833	5292070
chrI	5294919	5295340
chrI	5296865	5297213
chrI	5298030	5298600
chrI	5300415	5300858
chrI	5307815	5308615
chrI	5311509	5312447
chrI	5313735	5314382
chrI	5315866	5317037
chrI	5319355	5319747
chrI	5353879	5354072
chrI	5356908	5357615
chrI	5362666	5362890
chrI	5371857	5372855
chrI	5379807	5380104
chrI	5380967	5381625
chrI	5388161	5388779
chrI	5409615	5410004
chrI	5420144	5420633
chrI	5429823	5430061
chrI	5431670	5432012
chrI	5445475	5445786
chrI	5454093	5454432
chrI	5455078	5455930
chrI	5470914	5471284
chrI	5485808	5486126
chrI	5487366	5487987
chrI	5504046	5504331
chrI	5516280	5517041
chrI	5550450	5550712
chrI	5554324	5554717
chrI	5563021	5563303
chrI	5563701	5563947
chrI	5567081	5567596
chrI	5572955	5573202
chrI	5579039	5579635
chrI	5593928	5594291
chrI	5594905	5595256
chrI	5608868	5609278
chrI	5610633	5611179
chrI	5619167	5619922
chrI	5620647	5622139
chrI	5625974	5626311
chrI	5637675	5638189
chrI	5639001	5639743
chrI	5678597	5679243
chrI	5706888	5707130
chrI	5707592	5708105
chrI	5741521	5741925
chrI	5745670	5746611
chrI	5747163	5747469
chrI	5753673	5753889
chrI	5762369	5762568
chrI	5762730	5763410
chrI	5768848	5769100
chrI	5774401	5775143
chrI	5787380	5787814
chrI	5791915	5792137
chrI	5807411	5807667
chrI	5827285	5828371
chrI	5835281	5835654
chrI	5842998	5843213
chrI	5855069	5855327
chrI	5861776	5862234
chrI	5900895	5901152
chrI	5913323	5913561
chrI	5914632	5915285
chrI	5918678	5918897
chrI	5939487	5939891
chrI	5976070	5976399
chrI	5976682	5977218
chrI	5977863	5978120
chrI	5978537	5979133
chrI	5982834	5983422
chrI	5985648	5986517
chrI	6003045	6003267
chrI	6051086	6051312
chrI	6051798	6052060
chrI	6052883	6053251
chrI	6061082	6061477
chrI	6063016	6063352
chrI	6067652	6067981
chrI	6081196	6081616
chrI	6082696	6082951
chrI	6087939	6088558
chrI	6088999	6089525
chrI	6090810	6091386
chrI	6114890	6115497
chrI	6116135	6116765
chrI	6117750	6118414
chrI	6119912	6120339
chrI	6136511	6136744
chrI	6163410	6163653
chrI	6164085	6164368
chrI	6171317	6171715
chrI	6177132	6177476
chrI	6189800	6190204
chrI	6190471	6190795
chrI	6210159	6210511
chrI	6212661	6213023
chrI	6215466	6215686
chrI	6220870	6221143
chrI	6224193	6224897
chrI	6230196	6230483
chrI	6279003	6279202
chrI	6282397	6283005
chrI	6314810	6315034
chrI	6317214	6318054
chrI	6321112	6321474
chrI	6340568	6341195
chrI	6349243	6349562
chrI	6350046	6350449
chrI	6353531	6353797
chrI	6354137	6354331
chrI	6361102	6361301
chrI	6366221	6366533
chrI	6369769	6370007
chrI	6373010	6373389
chrI	6407305	6407513
chrI	6442796	6443161
chrI	6446531	6446751
chrI	6460791	6461010
chrI	6467581	6467967
chrI	6472409	6472721
chrI	6472950	6473693
chrI	6473871	6474124
chrI	6496093	6496672
chrI	6513764	6514017
chrI	6519541	6519753
chrI	6529574	6529780
chrI	6532897	6533602
chrI	6541969	6542179
chrI	6554487	6554797
chrI	6564479	6564740
chrI	6565881	6566142
chrI	6572675	6574015
chrI	6586005	6586377
chrI	6611253	6611590
chrI	6626820	6627028
chrI	6647383	6648568
chrI	6657998	6658236
chrI	6660050	6660500
chrI	6717087	6717410
chrI	6722926	6723691
chrI	6724098	6724953
chrI	6736182	6736375
chrI	6738492	6738732
chrI	6739452	6739702
chrI	6756444	6756666
chrI	6758675	6758874
chrI	6760207	6760466
chrI	6771905	6774006
chrI	6778292	6778613
chrI	6779171	6779537
chrI	6780124	6780419
chrI	6781655	6781919
chrI	6787671	6787951
chrI	6789990	6790654
chrI	6799510	6799830
chrI	6808598	6808809
chrI	6812213	6812492
chrI	6835257	6836070
chrI	6837625	6838369
chrI	6847002	6847634
chrI	6854249	6855252
chrI	6858267	6858484
chrI	6858577	6858862
chrI	6877961	6878226
chrI	6880347	6880546
chrI	6898142	6898829
chrI	6917839	6918114
chrI	6932497	6932857
chrI	6933469	6933791
chrI	6936000	6936242
chrI	6948565	6949963
chrI	6950398	6950982
chrI	6971392	6971631
chrI	6973611	6974291
chrI	6982211	6982482
chrI	7002186	7002564
chrI	7014363	7014654
chrI	7018261	7018802
chrI	7020609	7021102
chrI	7021235	7021633
chrI	7029206	7029647
chrI	7059132	7059714
chrI	7071289	7071528
chrI	7078885	7079487
chrI	7079596	7079868
chrI	7081348	7083972
chrI	7084280	7085351
chrI	7085671	7087090
chrI	7090244	7090575
chrI	7094954	7095333
chrI	7097934	7098518
chrI	7099365	7100192
chrI	7158809	7159453
chrI	7218046	7218353
chrI	7234735	7235113
chrI	7239253	7239827
chrI	7251646	7251849
chrI	7255228	7255488
chrI	7259596	7259899
chrI	7284504	7285023
chrI	7285893	7286194
chrI	7312135	7312460
chrI	7314343	7314665
chrI	7318764	7319195
chrI	7330770	7331111
chrI	7344679	7345007
chrI	7345132	7345432
chrI	7413099	7413406
chrI	7466634	7466874
chrI	7466929	7467230
chrI	7472370	7472803
chrI	7474588	7475589
chrI	7476587	7477154
chrI	7494145	7494877
chrI	7503632	7504415
chrI	7518056	7519673
chrI	7527383	7527891
chrI	7535426	7535666
chrI	7542696	7543839
chrI	7553081	7553820
chrI	7554667	7554912
chrI	7570672	7572048
chrI	7572325	7572879
chrI	7573024	7574265
chrI	7584466	7584834
chrI	7585130	7587221
chrI	7587951	7588769
chrI	7595022	7596021
chrI	7597847	7598154
chrI	7633966	7634418
chrI	7656492	7656988
chrI	7667738	7668122
chrI	7673756	7674039
chrI	7676171	7676577
chrI	7695180	7695480
chrI	7699062	7699685
chrI	7700948	7701383
chrI	7707173	7707689
chrI	7708404	7709537
chrI	7709691	7710241
chrI	7718819	7719757
chrI	7721717	7722331
chrI	7723198	7723664
chrI	7740007	7742570
chrI	7747222	7747534
chrI	7772573	7772855
chrI	7779746	7781514
chrI	7781836	7782225
chrI	7813144	7813472
chrI	7814606	7815023
chrI	7826964	7827244
chrI	7831953	7832364
chrI	7835010	7835808
chrI	7841517	7841837
chrI	7842795	7843067
chrI	7853112	7853392
chrI	7860858	7863121
chrI	7866063	7866662
chrI	7866853	7869812
chrI	7874925	7875250
chrI	7894931	7895680
chrI	7905824	7906134
chrI	7919162	7919393
chrI	7935217	7936297
chrI	7940663	7940906
chrI	7942999	7943440
chrI	7945539	7946191
chrI	7961811	7962032
chrI	7970083	7970477
chrI	7983039	7983376
chrI	7993706	7994146
chrI	8021229	8021615
chrI	8024614	8024816
chrI	8027922	8028118
chrI	8039248	8039520
chrI	8055745	8055955
chrI	8082832	8083262
chrI	8098435	8099084
chrI	8105149	8105690
chrI	8109240	8109701
chrI	8109811	8110056
chrI	8124384	8124758
chrI	8172125	8172362
chrI	8213144	8214618
chrI	8218478	8219795
chrI	8223004	8224545
chrI	8245501	8245784
chrI	8252726	8253299
chrI	8256593	8256905
chrI	8259425	8259671
chrI	8309203	8309884
chrI	8313778	8314204
chrI	8315133	8315713
chrI	8331032	8331532
chrI	8336762	8337013
chrI	8370282	8370589
chrI	8376936	8377286
chrI	8391914	8392367
chrI	8392502	8392883
chrI	8410946	8411556
chrI	8412335	8413043
chrI	8416225	8416417
chrI	8422364	8422618
chrI	8425676	8426573
chrI	8434244	8434501
chrI	8477207	8477475
chrI	8483757	8484234
chrI	8487257	8487622
chrI	8502353	8502556
chrI	8532313	8532630
chrI	8548062	8548331
chrI	8548883	8549111
chrI	8609693	8609896
chrI	8615105	8615361
chrI	8616487	8616723
chrI	8617006	8617443
chrI	8634995	8635340
chrI	8637201	8638189
chrI	8645554	8645838
chrI	8647068	8647506
chrI	8648460	8648729
chrI	8664079	8664994
chrI	8681641	8681860
chrI	8692527	8692936
chrI	8696287	8696519
chrI	8700536	8700726
chrI	8726054	8726330
chrI	8728531	8728807
chrI	8732706	8732992
chrI	8747376	8747730
chrI	8747849	8748134
chrI	8751431	8751790
chrI	8757765	8758191
chrI	8759633	8760049
chrI	8760149	8760477
chrI	8760554	8762311
chrI	8789218	8789760
chrI	8791262	8791481
chrI	8797952	8798142
chrI	8800839	8801064
chrI	8808035	8808496
chrI	8813355	8813575
chrI	8816456	8816652
chrI	8821419	8821644
chrI	8839137	8839466
chrI	8859132	8859331
chrI	8863206	8863475
chrI	8918627	8919108
chrI	8949044	8949433
chrI	8952856	8953341
chrI	8961441	8961648
chrI	8970056	8970250
chrI	8973696	8974114
chrI	8992533	8992759
chrI	9013996	9014243
chrI	9051163	9051429
chrI	9059106	9059519
chrI	9064616	9065040
chrI	9070899	9071222
chrI	9077311	9077529
chrI	9079974	9080290
chrI	9080466	9080988
chrI	9085821	9086206
chrI	9097863	9098424
chrI	9100098	9100637
chrI	9100735	9101112
chrI	9108671	9109063
chrI	9110746	9111168
chrI	9111472	9112032
chrI	9112789	9113504
chrI	9123561	9123801
chrI	9123963	9124265
chrI	9133261	9133716
chrI	9137830	9138291
chrI	9141647	9141924
chrI	9150268	9150526
chrI	9158498	9158703
chrI	9163408	9163758
chrI	9168603	9169806
chrI	9226507	9226995
chrI	9233615	9233863
chrI	9249268	9249540
chrI	9268769	9269440
chrI	9273940	9274163
chrI	9279680	9280390
chrI	9287019	9287444
chrI	9292071	9292417
chrI	9294617	9294828
chrI	9307066	9307881
chrI	9314671	9315623
chrI	9327380	9327769
chrI	9328284	9328720
chrI	9340572	9340821
chrI	9342424	9342922
chrI	9343077	9344663
chrI	9346951	9347290
chrI	9347588	9347984
chrI	9372912	9373802
chrI	9379923	9386279
chrI	9390201	9390757
chrI	9393391	9393945
chrI	9400052	9400521
chrI	9422230	9422522
chrI	9433848	9434083
chrI	9465517	9465758
chrI	9469021	9469230
chrI	9491559	9491828
chrI	9494872	9495135
chrI	9496176	9496814
chrI	9501555	9502274
chrI	9502924	9503502
chrI	9505763	9506329
chrI	9512028	9512696
chrI	9521655	9521882
chrI	9545663	9546465
chrI	9569039	9569508
chrI	9570055	9570316
chrI	9581500	9581761
chrI	9583421	9583716
chrI	9605180	9605929
chrI	9606668	9607049
chrI	9607465	9607897
chrI	9611475	9611802
chrI	9619858	9620139
chrI	9622398	9622628
chrI	9625682	9626266
chrI	9630747	9631270
chrI	9632661	9633001
chrI	9657974	9658182
chrI	9665102	9665349
chrI	9669136	9669377
chrI	9670909	9671262
chrI	9679420	9679809
chrI	9682484	9682824
chrI	9688729	9689064
chrI	9692165	9692354
chrI	9709712	9709940
chrI	9710764	9711071
chrI	9725308	9725808
chrI	9733925	9734410
chrI	9744236	9744584
chrI	9751014	9751295
chrI	9768201	9768600
chrI	9788230	9788883
chrI	9793182	9793626
chrI	9811373	9812130
chrI	9819738	9821368
chrI	9825478	9825760
chrI	9840840	9841255
chrI	9845035	9845236
chrI	9848001	9848307
chrI	9853340	9853568
chrI	9862015	9862465
chrI	9882860	9883466
chrI	9883530	9883806
chrI	9900658	9901288
chrI	9903270	9903921
chrI	9929194	9929686
chrI	9934414	9934614
chrI	9937424	9937654
chrI	9938370	9938682
chrI	9960195	9960417
chrI	9962033	9962300
chrI	9964241	9964460
chrI	9970136	9970446
chrI	9970512	9970879
chrI	9971317	9971709
chrI	9979708	9980019
chrI	9983497	9983900
chrI	9985616	9985823
chrI	9988433	9989444
chrI	9994121	9994430
chrI	10006244	10006585
chrI	10025950	10026187
chrI	10028848	10029100
chrI	10032123	10033189
chrI	10034922	10035580
chrI	10037036	10038038
chrI	10038181	10038578
chrI	10044609	10045235
chrI	10045823	10046168
chrI	10047135	10047425
chrI	10050387	10050591
chrI	10051005	10051542
chrI	10078767	10079245
chrI	10105955	10106482
chrI	10116824	10117151
chrI	10130517	10133178
chrI	10136951	10137712
chrI	10140938	10141314
chrI	10141758	10142092
chrI	10173145	10173356
chrI	10176169	10177061
chrI	10178069	10178561
chrI	10181537	10182040
chrI	10184041	10184564
chrI	10194505	10194714
chrI	10234919	10236066
chrI	10236480	10237506
chrI	10237560	10238133
chrI	10238740	10239320
chrI	10281871	10282400
chrI	10328638	10328981
chrI	10330489	10330753
chrI	10333127	10333340
chrI	10349755	10350122
chrI	10350567	10350936
chrI	10372762	10373150
chrI	10373934	10374127
chrI	10382621	10383043
chrI	10400629	10400925
chrI	10403048	10403338
chrI	10421612	10422580
chrI	10431394	10431793
chrI	10435417	10436037
chrI	10462603	10462872
chrI	10463743	10464405
chrI	10465142	10465470
[truncated: 12,968 more rows]

## Sheet: LIN-61 IDR peaks
chromosome	start	end
chrI	1	458
chrI	1865	4792
chrI	6008	6605
chrI	7398	9522
chrI	9679	9901
chrI	9999	12016
chrI	12221	17844
chrI	20742	21215
chrI	21394	24820
chrI	25256	26246
chrI	27083	27312
chrI	28041	28401
chrI	31773	39340
chrI	39772	43633
chrI	44891	45340
chrI	46379	47263
chrI	51352	52394
chrI	52832	53412
chrI	54578	55271
chrI	65082	65366
chrI	65433	69360
chrI	69861	72547
chrI	77855	78186
chrI	80466	81517
chrI	84384	87253
chrI	87549	88526
chrI	90411	91943
chrI	92047	95389
chrI	96022	96923
chrI	107474	110875
chrI	111040	112863
chrI	113075	115465
chrI	128207	132808
chrI	133329	133803
chrI	133997	134737
chrI	134845	135363
chrI	136432	137154
chrI	171849	172331
chrI	179004	180931
chrI	182178	188829
chrI	188974	190217
chrI	190271	191860
chrI	197940	198455
chrI	198779	200553
chrI	200815	201212
chrI	202071	202743
chrI	203061	203322
chrI	205277	206577
chrI	211060	211651
chrI	211829	213371
chrI	213479	218277
chrI	218684	223355
chrI	226068	226532
chrI	226659	231020
chrI	231242	233198
chrI	233264	239290
chrI	247406	253489
chrI	253692	254150
chrI	254251	254506
chrI	254657	255519
chrI	262129	262700
chrI	263298	264190
chrI	279256	282452
chrI	283809	284258
chrI	285020	285951
chrI	286556	287928
chrI	297107	300872
chrI	301217	301631
chrI	301800	302936
chrI	304097	304446
chrI	307924	308222
chrI	308629	309095
chrI	309180	310173
chrI	310424	311540
chrI	314282	316418
chrI	317278	317586
chrI	317821	319110
chrI	322918	323696
chrI	328409	328690
chrI	328828	330942
chrI	331072	334149
chrI	334604	336745
chrI	336855	343224
chrI	343530	343903
chrI	347322	347783
chrI	353313	353582
chrI	354091	357109
chrI	358351	362260
chrI	364210	365154
chrI	366159	366817
chrI	367147	367631
chrI	367773	368707
chrI	369051	369630
chrI	369711	370367
chrI	373115	373505
chrI	377324	379540
chrI	380647	383012
chrI	385529	385718
chrI	388835	389351
chrI	393459	394350
chrI	395230	396301
chrI	396429	397223
chrI	397339	398283
chrI	399222	400084
chrI	412660	413954
chrI	414126	414659
chrI	432052	432378
chrI	436120	436365
chrI	441780	443889
chrI	447224	449910
chrI	452298	453340
chrI	453417	454551
chrI	454780	455677
chrI	457214	459010
chrI	459400	460172
chrI	461495	461849
chrI	462621	465214
chrI	466414	467149
chrI	467628	468224
chrI	483649	483861
chrI	487029	488128
chrI	488298	488560
chrI	489148	496710
chrI	496915	497146
chrI	497253	497553
chrI	498518	498830
chrI	500362	501480
chrI	501787	503234
chrI	504147	507516
chrI	508378	520158
chrI	520334	521242
chrI	533235	534079
chrI	534262	534448
chrI	535299	535631
chrI	535716	539017
chrI	541935	544313
chrI	544443	545722
chrI	546731	548253
chrI	548329	550393
chrI	550591	550910
chrI	550989	551354
chrI	551440	551912
chrI	560894	561325
chrI	596625	597425
chrI	606593	607304
chrI	607421	608181
chrI	608292	611412
chrI	613914	623764
chrI	624161	631893
chrI	632935	634844
chrI	635052	636466
chrI	637449	638696
chrI	638922	639268
chrI	639392	641290
chrI	641402	642854
chrI	643162	644023
chrI	644078	646830
chrI	647033	654562
chrI	654789	655557
chrI	659631	660236
chrI	662138	662451
chrI	662979	663800
chrI	663898	664740
chrI	665083	666660
chrI	669025	669223
chrI	669354	670328
chrI	670517	671801
chrI	672583	673006
chrI	676905	677475
chrI	677624	677868
chrI	678003	678560
chrI	678696	679213
chrI	680433	681162
chrI	681761	682107
chrI	682882	683360
chrI	686757	687611
chrI	688450	701390
chrI	701622	705004
chrI	705466	706653
chrI	706927	707318
chrI	709805	710248
chrI	710945	712027
chrI	712201	722410
chrI	722554	723497
chrI	724514	725359
chrI	725649	726314
chrI	726567	726988
chrI	727692	728280
chrI	729916	732193
chrI	736765	737641
chrI	737780	738200
chrI	738345	738687
chrI	754076	754828
chrI	759911	760338
chrI	761474	762101
chrI	762270	763429
chrI	767333	768206
chrI	768603	770369
chrI	776672	777268
chrI	778005	778405
chrI	780475	781170
chrI	781606	782022
chrI	785311	786717
chrI	788530	789591
chrI	799040	799875
chrI	803621	804319
chrI	806990	807634
chrI	823816	826918
chrI	829045	830942
chrI	835185	835566
chrI	836858	837462
chrI	842945	843832
chrI	844306	845515
chrI	847501	849211
chrI	849312	850014
chrI	850177	853033
chrI	853226	853449
chrI	859638	860124
chrI	860383	860746
chrI	862394	863017
chrI	864381	866185
chrI	871617	872201
chrI	872358	874775
chrI	876295	885096
chrI	886568	892720
chrI	895777	896334
chrI	901428	902728
chrI	902855	906444
chrI	906876	908572
chrI	908659	910906
chrI	911233	911735
chrI	911917	912368
chrI	912953	913806
chrI	920543	921391
chrI	921715	922512
chrI	922821	925341
chrI	925706	926350
chrI	926816	927111
chrI	930434	931030
chrI	933460	934785
chrI	936074	936660
chrI	937007	937306
chrI	937558	938136
chrI	939639	939843
chrI	946002	946626
chrI	946759	947483
chrI	947737	947988
chrI	948093	948619
chrI	949261	950826
chrI	960517	961020
chrI	967091	967534
chrI	969916	970124
chrI	971885	972180
chrI	973102	973999
chrI	977815	978052
chrI	983709	984071
chrI	991821	992837
chrI	995225	995585
chrI	1002038	1002230
chrI	1006335	1006540
chrI	1006622	1006926
chrI	1007583	1007936
chrI	1008680	1009272
chrI	1009363	1011429
chrI	1011491	1012226
chrI	1012603	1013498
chrI	1014559	1020387
chrI	1020621	1021018
chrI	1021433	1022540
chrI	1024307	1024979
chrI	1025041	1026428
chrI	1030329	1032825
chrI	1033042	1034605
chrI	1038169	1039392
chrI	1040959	1041992
chrI	1042417	1043133
chrI	1046314	1046610
chrI	1047636	1049353
chrI	1049565	1054784
chrI	1056492	1056932
chrI	1057619	1066052
chrI	1066172	1070747
chrI	1070903	1071820
chrI	1072126	1072908
chrI	1073460	1076286
chrI	1076341	1076875
chrI	1077780	1082735
chrI	1086024	1087876
chrI	1088181	1090608
chrI	1096003	1096764
chrI	1097376	1098308
chrI	1099235	1099768
chrI	1100131	1100442
chrI	1116286	1116704
chrI	1116811	1118205
chrI	1120857	1124800
chrI	1133607	1134103
chrI	1135976	1136401
chrI	1137322	1137524
chrI	1137796	1138134
chrI	1138248	1139392
chrI	1139569	1140477
chrI	1140533	1141453
chrI	1141535	1142350
chrI	1142574	1142881
chrI	1143292	1144948
chrI	1145273	1145893
chrI	1146460	1147829
chrI	1149093	1149335
chrI	1151168	1152261
chrI	1153776	1155953
chrI	1156093	1156330
chrI	1156430	1164107
chrI	1164174	1166762
chrI	1167174	1168684
chrI	1168778	1170312
chrI	1170616	1171818
chrI	1174442	1175184
chrI	1175789	1176016
chrI	1176436	1177472
chrI	1178888	1179411
chrI	1179506	1179881
chrI	1181364	1182207
chrI	1183788	1184387
chrI	1184467	1185459
chrI	1185536	1185929
chrI	1186501	1187559
chrI	1187768	1188767
chrI	1194583	1194999
chrI	1197636	1200077
chrI	1200219	1200952
chrI	1201038	1202411
chrI	1202699	1203344
chrI	1206424	1207745
chrI	1209171	1210726
chrI	1210828	1211622
chrI	1211781	1214878
chrI	1214962	1221663
chrI	1221901	1222846
chrI	1222983	1231797
chrI	1231921	1232264
chrI	1232321	1232687
chrI	1232852	1233614
chrI	1233718	1237445
chrI	1239826	1240124
chrI	1241102	1242106
chrI	1243175	1243778
chrI	1244573	1246227
chrI	1248546	1248832
chrI	1249244	1251135
chrI	1251359	1251972
chrI	1252148	1254641
chrI	1254748	1255306
chrI	1255465	1256423
chrI	1257725	1258133
chrI	1258253	1258961
chrI	1259451	1260082
chrI	1260224	1260540
chrI	1263417	1264361
chrI	1264414	1266427
chrI	1266784	1267423
chrI	1267556	1268595
chrI	1269377	1269613
chrI	1278314	1279320
chrI	1279718	1280484
chrI	1283134	1283376
chrI	1283717	1285068
chrI	1293627	1294210
chrI	1295927	1297022
chrI	1297417	1298244
chrI	1298803	1299746
chrI	1301076	1301703
chrI	1303477	1303878
chrI	1303981	1306429
chrI	1311961	1314687
chrI	1315084	1315812
chrI	1316052	1316367
chrI	1320349	1322347
chrI	1322486	1324954
chrI	1327880	1329075
chrI	1332809	1333858
chrI	1334034	1343319
chrI	1344052	1348746
chrI	1349156	1349585
chrI	1351342	1352173
chrI	1352288	1352537
chrI	1353049	1353545
chrI	1353669	1353900
chrI	1354077	1354930
chrI	1355231	1356345
chrI	1356515	1360397
chrI	1360619	1378296
chrI	1380548	1380817
chrI	1386189	1387342
chrI	1388381	1389391
chrI	1392043	1393086
chrI	1399501	1400898
chrI	1403171	1403723
chrI	1403844	1404200
chrI	1404438	1405279
chrI	1405339	1406990
chrI	1407133	1409148
chrI	1409549	1410507
chrI	1410904	1416051
chrI	1416120	1418742
chrI	1418872	1419129
chrI	1419220	1421399
chrI	1422145	1423079
chrI	1423281	1424154
chrI	1424327	1427038
chrI	1429274	1431523
chrI	1434376	1434795
chrI	1435561	1435803
chrI	1437839	1438172
chrI	1439961	1440367
chrI	1444042	1448320
chrI	1450214	1451083
chrI	1452298	1452699
chrI	1452813	1454135
chrI	1454974	1455621
chrI	1458544	1459450
chrI	1460872	1461321
chrI	1462058	1463357
chrI	1476041	1476533
chrI	1479023	1479961
chrI	1480103	1483342
chrI	1483398	1484465
chrI	1485570	1486155
chrI	1486312	1490435
chrI	1491341	1492145
chrI	1493219	1494824
chrI	1497474	1499553
chrI	1503163	1504771
chrI	1504953	1505177
chrI	1506968	1507378
chrI	1508403	1508996
chrI	1509145	1509488
chrI	1510056	1512856
chrI	1513110	1513863
chrI	1519173	1520269
chrI	1521279	1522487
chrI	1522836	1523095
chrI	1524687	1526000
chrI	1529188	1530157
chrI	1531218	1531675
chrI	1532223	1533246
chrI	1533901	1539390
chrI	1540452	1541102
chrI	1541297	1545099
chrI	1545301	1546811
chrI	1547086	1561775
chrI	1562333	1565432
chrI	1565532	1566669
chrI	1566731	1567770
chrI	1567922	1568200
chrI	1568742	1571745
chrI	1571841	1572129
chrI	1572276	1573639
chrI	1575413	1575885
chrI	1575955	1576653
chrI	1576711	1578433
chrI	1579028	1581408
chrI	1581495	1583515
chrI	1591770	1592095
chrI	1593628	1594872
chrI	1595613	1596772
chrI	1596935	1597362
chrI	1597431	1598773
chrI	1598840	1599182
chrI	1599612	1599965
chrI	1610359	1611998
chrI	1612353	1612873
chrI	1613044	1613296
chrI	1613428	1614775
chrI	1618740	1624172
chrI	1625075	1625358
chrI	1626013	1626251
chrI	1626768	1627129
chrI	1627250	1627785
chrI	1628294	1629184
chrI	1629626	1629972
chrI	1630116	1630456
chrI	1631856	1632129
chrI	1632352	1632892
chrI	1633153	1634737
chrI	1637749	1638522
chrI	1639586	1640270
chrI	1640326	1641282
chrI	1642948	1643816
chrI	1644932	1645444
chrI	1646427	1648450
chrI	1649948	1650398
chrI	1651351	1651530
chrI	1661155	1663259
chrI	1665858	1666266
chrI	1667714	1668496
chrI	1668965	1671324
chrI	1671387	1672756
chrI	1673015	1673944
chrI	1675420	1676215
chrI	1676567	1676765
chrI	1681230	1681498
chrI	1684067	1684786
chrI	1685483	1685826
chrI	1685904	1686306
chrI	1687234	1687634
chrI	1688673	1689550
chrI	1690398	1692458
chrI	1692545	1701498
chrI	1701589	1704143
chrI	1706295	1706862
chrI	1712277	1712858
chrI	1715543	1716300
chrI	1716473	1716925
chrI	1717043	1717722
chrI	1718405	1719350
chrI	1719415	1722936
chrI	1725065	1726058
chrI	1727595	1728009
chrI	1729319	1730641
chrI	1730735	1732872
chrI	1732996	1734682
chrI	1736126	1741303
chrI	1741725	1742347
chrI	1743039	1743323
chrI	1743495	1743759
chrI	1744078	1744673
chrI	1744946	1745464
chrI	1745708	1746116
chrI	1746232	1748152
chrI	1751416	1753807
chrI	1755315	1759178
chrI	1760447	1762715
chrI	1771548	1783863
chrI	1790189	1790441
chrI	1792134	1792539
chrI	1792932	1793288
chrI	1795678	1795886
chrI	1797182	1797623
chrI	1800031	1800429
chrI	1809445	1810121
chrI	1810248	1811100
chrI	1813647	1813877
chrI	1815058	1817975
chrI	1819360	1819654
chrI	1820206	1820411
chrI	1821571	1822973
chrI	1823124	1823636
chrI	1823791	1825822
chrI	1825886	1826414
chrI	1827817	1828040
chrI	1832704	1844493
chrI	1844569	1848073
chrI	1849077	1849443
chrI	1849664	1849912
chrI	1851969	1853247
chrI	1862292	1863230
chrI	1863367	1863790
chrI	1864161	1864648
chrI	1869110	1869347
chrI	1870835	1871089
chrI	1871179	1871740
chrI	1872096	1872771
chrI	1873633	1879165
chrI	1881014	1882145
chrI	1883700	1884950
chrI	1888593	1888986
chrI	1890333	1890587
chrI	1890857	1891282
chrI	1892601	1893791
chrI	1893913	1894898
chrI	1895831	1896294
chrI	1899330	1900968
chrI	1901041	1901943
chrI	1910948	1911262
chrI	1911494	1922167
chrI	1926466	1927296
chrI	1930765	1931031
chrI	1935199	1938965
chrI	1940678	1941589
chrI	1954270	1954507
chrI	1958430	1958760
chrI	1966986	1968167
chrI	1968248	1970554
chrI	1970792	1973011
chrI	1973166	1974272
chrI	1974379	1975332
chrI	1977320	1981906
chrI	1982681	1983635
chrI	1986069	1986415
chrI	1986600	1987075
chrI	1987220	1990554
chrI	1997679	1999795
chrI	1999981	2000288
chrI	2001016	2002126
chrI	2002187	2003809
chrI	2003902	2004962
chrI	2005159	2008183
chrI	2008252	2010324
chrI	2010387	2010737
chrI	2010880	2011507
chrI	2011617	2012028
chrI	2012290	2012777
chrI	2018588	2019024
chrI	2019118	2021489
chrI	2021709	2024945
chrI	2025037	2026187
chrI	2030159	2040776
chrI	2040916	2045598
chrI	2045692	2046028
chrI	2046111	2053970
chrI	2054224	2063384
chrI	2064728	2065912
chrI	2066158	2067146
chrI	2067298	2068169
chrI	2068613	2070962
chrI	2071234	2072440
chrI	2072653	2074049
chrI	2074463	2074941
chrI	2076203	2079991
chrI	2080128	2084456
chrI	2084740	2086272
chrI	2086362	2087035
chrI	2090905	2091823
chrI	2092886	2093645
chrI	2093951	2095002
chrI	2095242	2095701
chrI	2095841	2096924
chrI	2096979	2097205
chrI	2097424	2098063
chrI	2098298	2098867
chrI	2099086	2099671
chrI	2099904	2100929
chrI	2101209	2102368
chrI	2103206	2104799
chrI	2106799	2108941
chrI	2109097	2110556
chrI	2110698	2111593
chrI	2111791	2114950
chrI	2115043	2122920
chrI	2123180	2123546
chrI	2124189	2127424
chrI	2127490	2130274
chrI	2130390	2134978
chrI	2138793	2139743
chrI	2140161	2141227
chrI	2141630	2142218
chrI	2143202	2146284
chrI	2147098	2147595
chrI	2154201	2154703
chrI	2154942	2155325
chrI	2155451	2156701
chrI	2159355	2160187
chrI	2167924	2172197
chrI	2172353	2173318
chrI	2173675	2174096
chrI	2174786	2180361
chrI	2181702	2183697
chrI	2183867	2185238
chrI	2185477	2186419
chrI	2186522	2186908
chrI	2187262	2187477
chrI	2188154	2188418
chrI	2189405	2193849
chrI	2194980	2196666
chrI	2197175	2197567
chrI	2197625	2198008
chrI	2198165	2200265
chrI	2201458	2202354
chrI	2202831	2203331
chrI	2203390	2203986
chrI	2204682	2206523
chrI	2210402	2210839
chrI	2248790	2250417
chrI	2250971	2251287
chrI	2252756	2254788
chrI	2254899	2255962
chrI	2265788	2267066
chrI	2267511	2268069
chrI	2268345	2268983
chrI	2269170	2270284
chrI	2270619	2270986
chrI	2272275	2272834
chrI	2273090	2274394
chrI	2274555	2274757
chrI	2275258	2275549
chrI	2278997	2279234
chrI	2279466	2280845
chrI	2282081	2282918
chrI	2283554	2283920
chrI	2288770	2289233
chrI	2289393	2304950
chrI	2306462	2307322
chrI	2311375	2311993
chrI	2312199	2313158
chrI	2314069	2314561
chrI	2315878	2317974
chrI	2318071	2319258
chrI	2321771	2323743
chrI	2323888	2324127
chrI	2330228	2330483
chrI	2332724	2333508
chrI	2333716	2336221
chrI	2336300	2337733
chrI	2337947	2338542
chrI	2338716	2338981
chrI	2339747	2340373
chrI	2363175	2364695
chrI	2373791	2375058
chrI	2375382	2378449
chrI	2379334	2379819
chrI	2380348	2381879
chrI	2382021	2383488
chrI	2383575	2386243
chrI	2386634	2386958
chrI	2387195	2387690
chrI	2388929	2390257
chrI	2390545	2391744
chrI	2393063	2394216
chrI	2394398	2395212
chrI	2401522	2401766
chrI	2402215	2402834
chrI	2402895	2405819
chrI	2406092	2409255
chrI	2409892	2410284
chrI	2410505	2410858
chrI	2411455	2412199
chrI	2413959	2414896
chrI	2415859	2416493
chrI	2416867	2420809
chrI	2421477	2422731
chrI	2423336	2423970
chrI	2424131	2424974
chrI	2426482	2427441
chrI	2427743	2429289
chrI	2431640	2432578
chrI	2433964	2434292
chrI	2435524	2436646
chrI	2453842	2454222
chrI	2456576	2457319
chrI	2477775	2479002
chrI	2482746	2484518
chrI	2485551	2489708
chrI	2489784	2490408
chrI	2493309	2494392
chrI	2494923	2496922
chrI	2506183	2507312
chrI	2508421	2509144
chrI	2514062	2514652
chrI	2514705	2515089
chrI	2515499	2516159
chrI	2519683	2520391
chrI	2524686	2525948
chrI	2526171	2527061
chrI	2531406	2532863
chrI	2538257	2538909
chrI	2554090	2554861
chrI	2577160	2578097
chrI	2578207	2579475
chrI	2579582	2580418
chrI	2580518	2582976
chrI	2583942	2589678
chrI	2591141	2591637
chrI	2598628	2599407
chrI	2604094	2605662
chrI	2616169	2617216
chrI	2617443	2618933
chrI	2620351	2620747
chrI	2622231	2623212
chrI	2624364	2625083
chrI	2625572	2629465
chrI	2629610	2635460
chrI	2636053	2636621
chrI	2636685	2637553
chrI	2638989	2639984
chrI	2640348	2640800
chrI	2642704	2643202
chrI	2647402	2648025
chrI	2663107	2665093
chrI	2665276	2668092
chrI	2680484	2682932
chrI	2683028	2683827
chrI	2684405	2684633
chrI	2686751	2690518
chrI	2695395	2695708
chrI	2699966	2700362
chrI	2703929	2704603
chrI	2705501	2706159
chrI	2706606	2707391
chrI	2711298	2712563
chrI	2716910	2717364
chrI	2721650	2722727
chrI	2723492	2726280
chrI	2726982	2732577
chrI	2733478	2734149
chrI	2734294	2735303
chrI	2736328	2737024
chrI	2749749	2749946
chrI	2752598	2753958
chrI	2754521	2755391
chrI	2757960	2758456
chrI	2758589	2758864
chrI	2759901	2760459
chrI	2760608	2761190
chrI	2761285	2762661
chrI	2762770	2763578
chrI	2772415	2774086
chrI	2774366	2775622
chrI	2776171	2778716
chrI	2803121	2803574
chrI	2822408	2824188
chrI	2825682	2827718
chrI	2829522	2829890
chrI	2830074	2832130
chrI	2832231	2832772
chrI	2834756	2836046
chrI	2851301	2851566
chrI	2852718	2853935
chrI	2854721	2863197
chrI	2863475	2864528
chrI	2864628	2870868
chrI	2872976	2873900
chrI	2875136	2878838
chrI	2879658	2880751
chrI	2885725	2890525
chrI	2890640	2891161
chrI	2895054	2895822
chrI	2896765	2900890
chrI	2900978	2904448
chrI	2904510	2905829
chrI	2906244	2909708
chrI	2914153	2918807
chrI	2919603	2920852
chrI	2921125	2921488
chrI	2922108	2922592
chrI	2927046	2928666
chrI	2928874	2930051
chrI	2930212	2931174
chrI	2932897	2933383
chrI	2933521	2934180
chrI	2935590	2936179
chrI	2936386	2936884
chrI	2939577	2940335
chrI	2940479	2941915
chrI	2942031	2947565
chrI	2949037	2949630
chrI	2949709	2951323
chrI	2951691	2953331
chrI	2955857	2956662
chrI	2958693	2960986
chrI	2962447	2963158
chrI	2985149	2985543
chrI	2995550	2996979
chrI	2998216	3001259
chrI	3001444	3001758
chrI	3003062	3004778
chrI	3005426	3005689
chrI	3008027	3008290
chrI	3008715	3009096
chrI	3009162	3015245
chrI	3015697	3018259
chrI	3028081	3029733
chrI	3030489	3030687
chrI	3032074	3032680
chrI	3033620	3036409
chrI	3037871	3038601
chrI	3038862	3039498
chrI	3039783	3040483
chrI	3040709	3041175
chrI	3047851	3048251
chrI	3048434	3049377
chrI	3052324	3052673
chrI	3060975	3064892
chrI	3070822	3071576
chrI	3072834	3075386
chrI	3076948	3077558
chrI	3079719	3080356
chrI	3082950	3083426
chrI	3083862	3084109
chrI	3084813	3085935
chrI	3086080	3088198
chrI	3088264	3089929
chrI	3096034	3096457
chrI	3097178	3097673
chrI	3098077	3101409
chrI	3101521	3102433
chrI	3103046	3103387
chrI	3104072	3105703
chrI	3105969	3106650
chrI	3111503	3111775
chrI	3112736	3113058
chrI	3117016	3117615
chrI	3117900	3118369
chrI	3142240	3144444
chrI	3146446	3147156
chrI	3149563	3153010
chrI	3157394	3157917
chrI	3158039	3159496
chrI	3161067	3162644
chrI	3167268	3168201
chrI	3170033	3170735
chrI	3171612	3172435
chrI	3172759	3173238
chrI	3176509	3176742
chrI	3188636	3189506
chrI	3190829	3191858
chrI	3191922	3192196
chrI	3192517	3192873
chrI	3194857	3195450
chrI	3198881	3199277
chrI	3205264	3205697
chrI	3208055	3209021
chrI	3209297	3210163
chrI	3227966	3228248
chrI	3230706	3231239
chrI	3242548	3253927
chrI	3254438	3254775
chrI	3262616	3264117
chrI	3265012	3266312
chrI	3266475	3266919
chrI	3268829	3269307
chrI	3269601	3270653
chrI	3276535	3277060
chrI	3278403	3279205
chrI	3283467	3284049
chrI	3287529	3288244
chrI	3291906	3295572
chrI	3295796	3296230
chrI	3296569	3297060
chrI	3301601	3301958
chrI	3309558	3310488
chrI	3312461	3313962
chrI	3318169	3318636
chrI	3330615	3331129
chrI	3331324	3331811
chrI	3331910	3333327
chrI	3333410	3333599
chrI	3333697	3335395
chrI	3336284	3336955
chrI	3337748	3338537
chrI	3338637	3340244
chrI	3343782	3344064
chrI	3347217	3347455
chrI	3348934	3350153
chrI	3363091	3363381
chrI	3363560	3366684
chrI	3367019	3368848
chrI	3370610	3374803
chrI	3375085	3376562
chrI	3376915	3377707
chrI	3382201	3382472
chrI	3388683	3389274
chrI	3389698	3393739
chrI	3409478	3409667
chrI	3413860	3414220
chrI	3414370	3414914
chrI	3416871	3417719
chrI	3427380	3429245
chrI	3431190	3431939
chrI	3432181	3433124
chrI	3438610	3444348
chrI	3451525	3451950
chrI	3455959	3457215
chrI	3457791	3458070
chrI	3459017	3459327
chrI	3459493	3460664
chrI	3460838	3461299
chrI	3464206	3464473
chrI	3466670	3468519
chrI	3473043	3474567
chrI	3474759	3475448
chrI	3476038	3476732
chrI	3478989	3479689
chrI	3479790	3480647
chrI	3481496	3481677
chrI	3500696	3500978
chrI	3501965	3502181
chrI	3507215	3508424
chrI	3510596	3511684
chrI	3511754	3516225
chrI	3516345	3516697
chrI	3518794	3519146
chrI	3523430	3525078
chrI	3525249	3525548
chrI	3526133	3526605
chrI	3538108	3538648
chrI	3540029	3540363
chrI	3546683	3547363
chrI	3549320	3550147
chrI	3551078	3551727
chrI	3551935	3552499
chrI	3553131	3554107
chrI	3554419	3555205
chrI	3555360	3558169
chrI	3558688	3559139
chrI	3559339	3559789
chrI	3560109	3560798
chrI	3562065	3565039
chrI	3565118	3565709
chrI	3566711	3567109
chrI	3567295	3567694
chrI	3582085	3582687
chrI	3584572	3585210
chrI	3600257	3600991
chrI	3601217	3602127
chrI	3602282	3603623
chrI	3605719	3606000
chrI	3608298	3608502
chrI	3610509	3610839
chrI	3612460	3612912
chrI	3613082	3613259
chrI	3624330	3624612
chrI	3627521	3628299
chrI	3638804	3639375
chrI	3643979	3645074
chrI	3656972	3657379
chrI	3662986	3663273
chrI	3664192	3666166
chrI	3679495	3680621
chrI	3680817	3681858
chrI	3682041	3683083
chrI	3692750	3693108
chrI	3700419	3700847
chrI	3704762	3705352
chrI	3709999	3711081
chrI	3711825	3713095
chrI	3714079	3714303
chrI	3719825	3720376
chrI	3721340	3723748
chrI	3726248	3731102
chrI	3731259	3731802
chrI	3732371	3734569
chrI	3736154	3740993
chrI	3741107	3741443
chrI	3742673	3742929
chrI	3745793	3746483
chrI	3746877	3747341
chrI	3753504	3753858
chrI	3755903	3756196
chrI	3756770	3757262
chrI	3761360	3761982
chrI	3762164	3762477
chrI	3763146	3765904
chrI	3783339	3783799
chrI	3784993	3787195
chrI	3787704	3787872
chrI	3787987	3789214
chrI	3793277	3793857
chrI	3794682	3796014
chrI	3796754	3797300
chrI	3797392	3798455
chrI	3805353	3805898
chrI	3806009	3806187
chrI	3806398	3807441
chrI	3816395	3817195
chrI	3817340	3818516
chrI	3821731	3822154
chrI	3822251	3825382
chrI	3826585	3826865
chrI	3827237	3827771
chrI	3829356	3832519
chrI	3834637	3835170
chrI	3854942	3855709
chrI	3858778	3859322
chrI	3860425	3862783
chrI	3865687	3867085
chrI	3867215	3868144
chrI	3869184	3869398
chrI	3870400	3870817
chrI	3873845	3874088
chrI	3881422	3881661
chrI	3886058	3886426
chrI	3886885	3887636
chrI	3888440	3888957
chrI	3909656	3910164
chrI	3910673	3911247
chrI	3911721	3911955
chrI	3919327	3920233
chrI	3927566	3932462
chrI	3976368	3976621
chrI	3980155	3981229
chrI	3982777	3983543
chrI	3986258	3986917
chrI	3987241	3987701
chrI	3996942	3997212
chrI	4005222	4006568
chrI	4006852	4007589
chrI	4008072	4009494
chrI	4016896	4019273
chrI	4114528	4114791
chrI	4128576	4129083
chrI	4132208	4132719
chrI	4135285	4135598
chrI	4138202	4139616
chrI	4139840	4141461
chrI	4167755	4168409
chrI	4171093	4172642
chrI	4174494	4176550
chrI	4185140	4190908
chrI	4199294	4202084
chrI	4202274	4202946
chrI	4213022	4213703
chrI	4216698	4216895
chrI	4253778	4254499
chrI	4264747	4265173
chrI	4265897	4266152
chrI	4297640	4298138
chrI	4302839	4303064
chrI	4303766	4304935
chrI	4374706	4376641
chrI	4382053	4382732
chrI	4385250	4387161
chrI	4389303	4389522
chrI	4431741	4432808
chrI	4432866	4433554
chrI	4433646	4434545
chrI	4434776	4435647
chrI	4436001	4437178
chrI	4451024	4451257
chrI	4454911	4455437
chrI	4455846	4456536
chrI	4456690	4458401
chrI	4459102	4459348
chrI	4459558	4469919
chrI	4474735	4475360
chrI	4479396	4479971
chrI	4485688	4492870
chrI	4493255	4498201
chrI	4504058	4504463
chrI	4508306	4509217
chrI	4534431	4537469
chrI	4540370	4542214
chrI	4542389	4543761
chrI	4543955	4546330
chrI	4546536	4547649
chrI	4548199	4548511
chrI	4556860	4557362
chrI	4571743	4571975
chrI	4573082	4574776
chrI	4579387	4579591
chrI	4583614	4584974
chrI	4585082	4586456
chrI	4587099	4587318
chrI	4602899	4603169
chrI	4607189	4607493
chrI	4608207	4608805
chrI	4621562	4621860
chrI	4633581	4633795
chrI	4636183	4637176
chrI	4643752	4644153
chrI	4644266	4644550
chrI	4645099	4647054
chrI	4647146	4647377
chrI	4650503	4651276
chrI	4653109	4655543
chrI	4660054	4660451
chrI	4662359	4662707
chrI	4671584	4673157
chrI	4673327	4674662
chrI	4683715	4683954
chrI	4698917	4699978
chrI	4701751	4702141
chrI	4705944	4706201
chrI	4716250	4716588
chrI	4744047	4747872
chrI	4748761	4749334
chrI	4749662	4750272
chrI	4750329	4752032
chrI	4753324	4754174
chrI	4754339	4755536
chrI	4759675	4759887
chrI	4765384	4770524
chrI	4773082	4773285
chrI	4773544	4773731
chrI	4777494	4778335
chrI	4778486	4782947
chrI	4783848	4784305
chrI	4784500	4786649
chrI	4786706	4788713
chrI	4788904	4789742
chrI	4789889	4791548
chrI	4803997	4804387
chrI	4823995	4824345
chrI	4824522	4824790
chrI	4829852	4830240
chrI	4831795	4833773
chrI	4838628	4839422
chrI	4841468	4843074
chrI	4848436	4849170
chrI	4895633	4896014
chrI	4910849	4911238
chrI	4911483	4911840
chrI	4911926	4912391
chrI	4913636	4918388
chrI	4926479	4926675
chrI	4932155	4934481
chrI	4935995	4938340
chrI	4938515	4938723
chrI	4941064	4943977
chrI	4957849	4962878
chrI	4967572	4967795
chrI	4976286	4977967
chrI	4978229	4979668
chrI	4993721	4993933
chrI	4995969	4996230
chrI	5034439	5035987
chrI	5079604	5080146
chrI	5092318	5092607
chrI	5104765	5105150
chrI	5110137	5110859
chrI	5113810	5114036
chrI	5126910	5127754
chrI	5129650	5131385
chrI	5133560	5134796
chrI	5137993	5140793
chrI	5142381	5142850
chrI	5143372	5143583
chrI	5144466	5145818
chrI	5152602	5153177
chrI	5153241	5153814
chrI	5157180	5157354
chrI	5159489	5162290
chrI	5164946	5165117
chrI	5174986	5176596
chrI	5255844	5256978
chrI	5261641	5261886
chrI	5268540	5268940
chrI	5270604	5271000
chrI	5271094	5271266
chrI	5271411	5272908
chrI	5273857	5274473
chrI	5291182	5293915
chrI	5293979	5299023
chrI	5299115	5301684
chrI	5305929	5309916
chrI	5310063	5315018
chrI	5315357	5317103
chrI	5344590	5345803
chrI	5357087	5357818
chrI	5358027	5358666
chrI	5362410	5362906
chrI	5368155	5370309
chrI	5370407	5373528
chrI	5374876	5377069
chrI	5377232	5378160
chrI	5378464	5380091
chrI	5380919	5381961
chrI	5388229	5388720
chrI	5408061	5408969
chrI	5409122	5411654
chrI	5419921	5420886
chrI	5421485	5423767
chrI	5429463	5429679
chrI	5429824	5430342
chrI	5431743	5431961
chrI	5451628	5454670
chrI	5455105	5455754
chrI	5470896	5471257
chrI	5484379	5486092
chrI	5549953	5550713
chrI	5554367	5554655
chrI	5567115	5567500
chrI	5569984	5573140
chrI	5577160	5578159
chrI	5578486	5579614
chrI	5593948	5595243
chrI	5608934	5609390
chrI	5619208	5622073
chrI	5626050	5626278
chrI	5637661	5638178
chrI	5638988	5640035
chrI	5640309	5641363
chrI	5678565	5679166
chrI	5687507	5688810
chrI	5689442	5690786
chrI	5691574	5692698
chrI	5706869	5707141
chrI	5707815	5708073
chrI	5741594	5741897
chrI	5745740	5746347
chrI	5762749	5763350
chrI	5774439	5775622
chrI	5801400	5803393
chrI	5807415	5810440
chrI	5811436	5811673
chrI	5817968	5818359
chrI	5822611	5823030
chrI	5824415	5825848
chrI	5825901	5826254
chrI	5826453	5828014
chrI	5828104	5828662
chrI	5828810	5829154
chrI	5842991	5843236
chrI	5858231	5859107
chrI	5865867	5866372
chrI	5867978	5868918
chrI	5869757	5872090
chrI	5904183	5905150
chrI	5905330	5905796
chrI	5905887	5906111
chrI	5914651	5915211
chrI	5939553	5939831
chrI	5974946	5975882
chrI	5975946	5976558
chrI	5976687	5977599
chrI	5977675	5978119
chrI	5978209	5986690
chrI	5995948	5998302
chrI	5999098	5999479
chrI	6000160	6002835
chrI	6003065	6003285
chrI	6024513	6025177
chrI	6050952	6051345
chrI	6051751	6052014
chrI	6052894	6053267
chrI	6060304	6061441
chrI	6063069	6063905
chrI	6064039	6064610
chrI	6079336	6080026
chrI	6080222	6081098
chrI	6081276	6081698
chrI	6082692	6082972
chrI	6090569	6094627
chrI	6105616	6105908
chrI	6114854	6115400
chrI	6116198	6116788
chrI	6117636	6118403
chrI	6118919	6123222
chrI	6135715	6135996
chrI	6136484	6136712
chrI	6163403	6163638
chrI	6164091	6164351
chrI	6183872	6184095
chrI	6209841	6210661
chrI	6210786	6211147
chrI	6212600	6213079
chrI	6214118	6215349
chrI	6215779	6216208
chrI	6219472	6221087
chrI	6224192	6224863
chrI	6229718	6230566
chrI	6264966	6265263
chrI	6282428	6287261
chrI	6287478	6289001
chrI	6314794	6315559
chrI	6317182	6318283
chrI	6318359	6318897
chrI	6340774	6341297
chrI	6346904	6347321
chrI	6348244	6355317
chrI	6366250	6366595
chrI	6368106	6368340
chrI	6369764	6370026
chrI	6372077	6382472
chrI	6442850	6443128
chrI	6446544	6446742
chrI	6458675	6459011
chrI	6459262	6460510
chrI	6460811	6461044
chrI	6465892	6466164
chrI	6466377	6467386
chrI	6471992	6472706
chrI	6472912	6474199
chrI	6495536	6496617
chrI	6498004	6499139
chrI	6499234	6499873
chrI	6513780	6514050
chrI	6517442	6518082
chrI	6532935	6533276
chrI	6541968	6542148
chrI	6552551	6554299
chrI	6554504	6554854
chrI	6564298	6566125
chrI	6569103	6569749
chrI	6569927	6571160
chrI	6571315	6572454
chrI	6572598	6579232
chrI	6579788	6581617
chrI	6581754	6583570
chrI	6585133	6586474
chrI	6603225	6604296
chrI	6607184	6607551
chrI	6607721	6611548
chrI	6647423	6648559
chrI	6660107	6660418
chrI	6721481	6722266
chrI	6722381	6723018
chrI	6723109	6724911
chrI	6745466	6745788
chrI	6753479	6754285
chrI	6754390	6754685
chrI	6756446	6758034
chrI	6771956	6773445
chrI	6779220	6781192
chrI	6781549	6782029
chrI	6788928	6789822
chrI	6790371	6790729
chrI	6799378	6800799
chrI	6813808	6814653
chrI	6819920	6832705
chrI	6833372	6833744
chrI	6835189	6838697
chrI	6846962	6847566
chrI	6854270	6857857
chrI	6877981	6878208
chrI	6898194	6898762
chrI	6914354	6915267
chrI	6924320	6925960
chrI	6927978	6928629
chrI	6929841	6930320
chrI	6930437	6930836
chrI	6931770	6933793
chrI	6948541	6950926
chrI	6973651	6974161
chrI	7003381	7004830
chrI	7015575	7016455
chrI	7017085	7021134
chrI	7021229	7022077
chrI	7025103	7028854
chrI	7056262	7059843
chrI	7078855	7088028
chrI	7097932	7100283
chrI	7127452	7128460
chrI	7138998	7140049
chrI	7143066	7144153
chrI	7147148	7149334
chrI	7149511	7149862
chrI	7156514	7159132
chrI	7224276	7224445
chrI	7234493	7235622
chrI	7237922	7238929
chrI	7239324	7239566
chrI	7244819	7245023
chrI	7250419	7251267
chrI	7251628	7251881
chrI	7279301	7279573
chrI	7284639	7284973
chrI	7285945	7286141
chrI	7302811	7303281
chrI	7314400	7318099
chrI	7330772	7331106
chrI	7344716	7344933
chrI	7352152	7352320
chrI	7466232	7466825
chrI	7466964	7467187
chrI	7472394	7472693
chrI	7474048	7476341
chrI	7476394	7477401
chrI	7489423	7491487
chrI	7491858	7493420
chrI	7494052	7494444
chrI	7494593	7494914
chrI	7499958	7501633
chrI	7517477	7522363
chrI	7523107	7523580
chrI	7542045	7545894
chrI	7547284	7547835
chrI	7548046	7548949
chrI	7553211	7553789
chrI	7554675	7555351
chrI	7559589	7560056
chrI	7563063	7564099
chrI	7570734	7574379
chrI	7575091	7576181
chrI	7583516	7584261
chrI	7584401	7588719
chrI	7594341	7594857
chrI	7594977	7597417
chrI	7597515	7598438
chrI	7649927	7650136
chrI	7656477	7662311
chrI	7686142	7691501
chrI	7695205	7697487
chrI	7697564	7698161
chrI	7699034	7699766
chrI	7700965	7702991
chrI	7704276	7705007
chrI	7706802	7711192
chrI	7712228	7712960
chrI	7718851	7719140
chrI	7721789	7723041
chrI	7723122	7723693
chrI	7740285	7742445
chrI	7769851	7772287
chrI	7772566	7774243
chrI	7778294	7779068
chrI	7779318	7781694
chrI	7781767	7782636
chrI	7814553	7814796
chrI	7834884	7835756
chrI	7840101	7840657
chrI	7841014	7847157
chrI	7847318	7849739
chrI	7857836	7862712
chrI	7865441	7865760
chrI	7866068	7872780
chrI	7893872	7895634
chrI	7933884	7936275
chrI	7940478	7941164
chrI	7942118	7942474
chrI	7942588	7943198
chrI	7961840	7962376
chrI	7967385	7969609
chrI	7983114	7983307
chrI	7985058	7985266
chrI	8019654	8019928
chrI	8024623	8024807
chrI	8028193	8030659
chrI	8030813	8031105
chrI	8035546	8036695
chrI	8039091	8039495
chrI	8044995	8049849
chrI	8082856	8083091
chrI	8098483	8098867
chrI	8100079	8101045
chrI	8101217	8103430
chrI	8109243	8109723
chrI	8120092	8120461
chrI	8124368	8124779
chrI	8212966	8217695
chrI	8218542	8219461
chrI	8223006	8224162
chrI	8224284	8224554
chrI	8245439	8245774
chrI	8256663	8256853
chrI	8259402	8259679
chrI	8276484	8279479
chrI	8279989	8283176
chrI	8283324	8285086
chrI	8290776	8291272
chrI	8293906	8294147
chrI	8294458	8294961
chrI	8304094	8306717
chrI	8307572	8308514
chrI	8308574	8309829
chrI	8315224	8315499
chrI	8328828	8329926
chrI	8331113	8331478
chrI	8369748	8370210
chrI	8376982	8377258
chrI	8380339	8387476
chrI	8391935	8392848
chrI	8393146	8395134
chrI	8410903	8411644
chrI	8412277	8413113
chrI	8416236	8416409
chrI	8425430	8426508
chrI	8432280	8434172
chrI	8434254	8434888
chrI	8487322	8487972
chrI	8490480	8491498
chrI	8494546	8495051
chrI	8519074	8520453
chrI	8530043	8530380
chrI	8576758	8578385
chrI	8578602	8579068
chrI	8579979	8581228
chrI	8581397	8582219
chrI	8617056	8617383
chrI	8636709	8637515
chrI	8637722	8638399
chrI	8645610	8645827
chrI	8647888	8648713
chrI	8663838	8664949
chrI	8676316	8677792
chrI	8678939	8681369
chrI	8681637	8681839
chrI	8692553	8693352
chrI	8696078	8696502
chrI	8736128	8736770
chrI	8747429	8747675
chrI	8751468	8751793
chrI	8751948	8752172
chrI	8757720	8758217
chrI	8759045	8759257
chrI	8759406	8760062
chrI	8760199	8763763
chrI	8766995	8768159
chrI	8789249	8789730
chrI	8789966	8791452
chrI	8791747	8792760
chrI	8808033	8808475
chrI	8809441	8810356
chrI	8810424	8811235
chrI	8813357	8813576
chrI	8815009	8816268
chrI	8816456	8816668
chrI	8838475	8838925
chrI	8839082	8839430
chrI	8863215	8863509
chrI	8916667	8919019
chrI	8949103	8949412
chrI	8952869	8953714
chrI	8966593	8966940
chrI	8970029	8970267
chrI	9014015	9014259
chrI	9050381	9054927
chrI	9057811	9058141
chrI	9064243	9064500
chrI	9077312	9077557
chrI	9080568	9080960
chrI	9085869	9086187
chrI	9086288	9086519
chrI	9094426	9095035
chrI	9097316	9098963
chrI	9100078	9101241
chrI	9102958	9103563
chrI	9104602	9106967
chrI	9107129	9108131
chrI	9108675	9109271
chrI	9110391	9111237
chrI	9111376	9111983
chrI	9112137	9113606
chrI	9113661	9118508
chrI	9126929	9127316
chrI	9128024	9132222
chrI	9132289	9133044
chrI	9133273	9133692
chrI	9137937	9138188
chrI	9141679	9141899
chrI	9144184	9144847
chrI	9145054	9148034
chrI	9148115	9150021
chrI	9163398	9165362
chrI	9165457	9172957
chrI	9173047	9175613
chrI	9175946	9176957
chrI	9177124	9177860
chrI	9181114	9181762
chrI	9198782	9199754
chrI	9226486	9226738
chrI	9240901	9243851
chrI	9243979	9244973
chrI	9249247	9249517
chrI	9266997	9267263
chrI	9268823	9269060
chrI	9273085	9274918
chrI	9279757	9279965
chrI	9280073	9280340
chrI	9286354	9287590
chrI	9292095	9292421
chrI	9293714	9294449
chrI	9307079	9308890
chrI	9313892	9315335
chrI	9319913	9320271
chrI	9327407	9327766
chrI	9328318	9328726
chrI	9332595	9333056
chrI	9334552	9336510
chrI	9342057	9342249
chrI	9343118	9343454
chrI	9347007	9347232
chrI	9347674	9347939
chrI	9370743	9371539
chrI	9371679	9376233
chrI	9376333	9386808
chrI	9390152	9390746
chrI	9393717	9393903
chrI	9398567	9400144
chrI	9400249	9400596
chrI	9421621	9422073
chrI	9422263	9422885
chrI	9423783	9428648
chrI	9428714	9429972
chrI	9430109	9431722
chrI	9445714	9445984
chrI	9448044	9448307
chrI	9469327	9470207
chrI	9470519	9473357
chrI	9494512	9495135
chrI	9495302	9504566
chrI	9505388	9506299
chrI	9512009	9513291
chrI	9513384	9514958
chrI	9515431	9516890
chrI	9545167	9547912
chrI	9547966	9548673
chrI	9548768	9555340
chrI	9569068	9569758
chrI	9570079	9570270
chrI	9581055	9581761
chrI	9583442	9583701
chrI	9583933	9584987
chrI	9585097	9585612
chrI	9605445	9605909
chrI	9606717	9606975
chrI	9607464	9607855
chrI	9611055	9611822
chrI	9619845	9620124
chrI	9622406	9622706
chrI	9624349	9625244
chrI	9625318	9626276
chrI	9630008	9631512
chrI	9665104	9665508
chrI	9669157	9669734
chrI	9679174	9680177
chrI	9680335	9682889
chrI	9688746	9689011
chrI	9689149	9690390
chrI	9708830	9711062
chrI	9720170	9728316
chrI	9728441	9730260
chrI	9730862	9736901
chrI	9737308	9737866
chrI	9739348	9739821
chrI	9739980	9740427
chrI	9751049	9754486
chrI	9768267	9768533
chrI	9773670	9774313
chrI	9785493	9785822
chrI	9785891	9791469
chrI	9791972	9793975
chrI	9811427	9812087
chrI	9819804	9820656
chrI	9840788	9841178
chrI	9850116	9861394
chrI	9862037	9862485
chrI	9862649	9862923
chrI	9869102	9872021
chrI	9882888	9883351
chrI	9883593	9883817
chrI	9937750	9947560
chrI	9947789	9948512
chrI	9962067	9965283
chrI	9970101	9970415
chrI	9979776	9979986
chrI	9983495	9983875
chrI	9988316	9989710
chrI	10025970	10026175
chrI	10028881	10029075
chrI	10030600	10030849
chrI	10031180	10042405
chrI	10044739	10045724
chrI	10046390	10046891
chrI	10079550	10080345
chrI	10085328	10086127
chrI	10088306	10090449
chrI	10091346	10092343
chrI	10092500	10092928
chrI	10093455	10094600
chrI	10094660	10100492
chrI	10101556	10102130
chrI	10102212	10106433
chrI	10121974	10125977
chrI	10130556	10130947
chrI	10131094	10131655
chrI	10131785	10133112
chrI	10136988	10137806
chrI	10140982	10141262
chrI	10141799	10142076
chrI	10170748	10173333
chrI	10173538	10179436
chrI	10181610	10182004
chrI	10184007	10185951
chrI	10230998	10235597
chrI	10235723	10235937
chrI	10236812	10238025
chrI	10238681	10239462
chrI	10281881	10282347
chrI	10330541	10330730
chrI	10330790	10331934
chrI	10333429	10336923
chrI	10349795	10350037
chrI	10372790	10373076
chrI	10374545	10374976
chrI	10382808	10382987
chrI	10398662	10399129
chrI	10399804	10400247
chrI	10417857	10419110
chrI	10419284	10422533
chrI	10434813	10437715
chrI	10463770	10464317
chrI	10468807	10469561
chrI	10477983	10479239
chrI	10484293	10488171
chrI	10488295	10488711
chrI	10516686	10517339
chrI	10528440	10529557
chrI	10549713	10549936
chrI	10551956	10552629
chrI	10552791	10554837
chrI	10560031	10562316
chrI	10562475	10564361
chrI	10564436	10565686
chrI	10565915	10566491
chrI	10567830	10570402
chrI	10577111	10577798
chrI	10579361	10580096
chrI	10587661	10588851
chrI	10592978	10593575
chrI	10593702	10594792
chrI	10623061	10623939
chrI	10635992	10636635
chrI	10639971	10640384
chrI	10650908	10651803
chrI	10652418	10653291
chrI	10653545	10654258
chrI	10678048	10678434
chrI	10682715	10683127
chrI	10685232	10685790
chrI	10686874	10687304
chrI	10688470	10688862
chrI	10712745	10713664
chrI	10716388	10718512
chrI	10720170	10720447
chrI	10739189	10739477
chrI	10749145	10749481
chrI	10749822	10750279
chrI	10750503	10751312
chrI	10751399	10764598
chrI	10764906	10773782
chrI	10773957	10775095
chrI	10775631	10776966
chrI	10777068	10777717
chrI	10779706	10780350
chrI	10780525	10783164
chrI	10783279	10783571
chrI	10783769	10789843
chrI	10791133	10791619
chrI	10792318	10793728
chrI	10795781	10796502
chrI	10798238	10798458
chrI	10806536	10806825
chrI	10807085	10807740
chrI	10819421	10820168
chrI	10866894	10867319
chrI	10872911	10873328
chrI	10881169	10881384
chrI	10881632	10890221
chrI	10903594	10904004
chrI	10924025	10924286
chrI	10926425	10926810
chrI	10927019	10928096
chrI	10936043	10937635
chrI	10947470	10948072
chrI	10949267	10949703
chrI	10954080	10954526
chrI	10957572	10959649
chrI	10964779	10965744
chrI	10966531	10967093
chrI	10972630	10975493
chrI	10976943	10979036
chrI	10979686	10981387
chrI	10990752	10991352
chrI	11005336	11005990
chrI	11007612	11008103
chrI	11017557	11018506
chrI	11019076	11019518
chrI	11023428	11024485
chrI	11025041	11025624
chrI	11025824	11026789
chrI	11031685	11038231
chrI	11045234	11046409
chrI	11049177	11049508
chrI	11050072	11066626
chrI	11066680	11068201
chrI	11068355	11077035
chrI	11077100	11078492
chrI	11078981	11083379
chrI	11083491	11087096
chrI	11087389	11101635
chrI	11101688	11111090
chrI	11124193	11125212
chrI	11125758	11126032
chrI	11126371	11127088
chrI	11127535	11127815
chrI	11159546	11159790
chrI	11162253	11162542
chrI	11163417	11177908
chrI	11181747	11182788
chrI	11183681	11185924
chrI	11194349	11195649
chrI	11195960	11199541
chrI	11200028	11206656
chrI	11207296	11208241
chrI	11215313	11216152
chrI	11224625	11225169
chrI	11225833	11226189
chrI	11226753	11228354
chrI	11228814	11229423
chrI	11229822	11230849
chrI	11230979	11232301
chrI	11233761	11234700
chrI	11236872	11237439
chrI	11238681	11239634
chrI	11246856	11247068
chrI	11253444	11254379
chrI	11257082	11257695
chrI	11259473	11259781
chrI	11260893	11261218
chrI	11262225	11262505
chrI	11262588	11262991
chrI	11273605	11276369
chrI	11276585	11277585
chrI	11280596	11282378
chrI	11282441	11283746
chrI	11284085	11286249
chrI	11287290	11288887
chrI	11289079	11291323
chrI	11291590	11293532
chrI	11293603	11293999
chrI	11295071	11295634
chrI	11304997	11308419
chrI	11311100	11313594
chrI	11315595	11317455
chrI	11317654	11319051
chrI	11319260	11319445
chrI	11319692	11320115
chrI	11321220	11323660
chrI	11324651	11327161
chrI	11327841	11333662
chrI	11335195	11335762
chrI	11357399	11357635
chrI	11363237	11363730
chrI	11364025	11368714
chrI	11369581	11373582
chrI	11377283	11377874
chrI	11380147	11380333
chrI	11380442	11385796
chrI	11385872	11388671
chrI	11388732	11400001
chrI	11400121	11400315
chrI	11400429	11402431
chrI	11406257	11409179
chrI	11415984	11416449
chrI	11416629	11416859
chrI	11417016	11417753
chrI	11419950	11421146
chrI	11427759	11427987
chrI	11437765	11442557
chrI	11443439	11447189
chrI	11453369	11453767
chrI	11467663	11468043
chrI	11479955	11481564
chrI	11485555	11488495
chrI	11494572	11495232
chrI	11502770	11503201
chrI	11504070	11504338
chrI	11504946	11506412
chrI	11506542	11506917
chrI	11517213	11524480
chrI	11525669	11526871
chrI	11527021	11528266
chrI	11529824	11530543
chrI	11530945	11534779
chrI	11536850	11538172
chrI	11541546	11541894
chrI	11545614	11546307
chrI	11547389	11547856
chrI	11549145	11549475
chrI	11552800	11553512
chrI	11554573	11555534
chrI	11555658	11555954
chrI	11556589	11557807
chrI	11558128	11558573
chrI	11558857	11559126
chrI	11576472	11578088
chrI	11579623	11579863
chrI	11580533	11581025
chrI	11583985	11584267
chrI	11584669	11586803
chrI	11593054	11593794
chrI	11594751	11595393
chrI	11595504	11596193
chrI	11596361	11599013
chrI	11599273	11600349
chrI	11601811	11602735
chrI	11602846	11603899
chrI	11604265	11604497
chrI	11606891	11609831
chrI	11611660	11614394
chrI	11615009	11615872
chrI	11627872	11628953
chrI	11637697	11638326
chrI	11649303	11649851
chrI	11650967	11651349
chrI	11652235	11652555
chrI	11655616	11656498
chrI	11656706	11657929
chrI	11658943	11660668
chrI	11660881	11661561
chrI	11661675	11662725
chrI	11663060	11663907
chrI	11667328	11669092
chrI	11669629	11673626
chrI	11674882	11675168
chrI	11675377	11676591
chrI	11676748	11679438
chrI	11680999	11682380
chrI	11682434	11683723
chrI	11684128	11688292
chrI	11689428	11690042
chrI	11693591	11694295
chrI	11728707	11729168
chrI	11729441	11730167
chrI	11737393	11737614
chrI	11742930	11743245
chrI	11745079	11747407
chrI	11755006	11755357
[truncated: 10,499 more rows]

## Sheet: MET-2 IDR peaks
chromosome	start	end
chrI	1	466
chrI	1838	2373
chrI	3326	4778
chrI	9143	9474
chrI	10057	11963
chrI	12221	16632
chrI	16843	17350
chrI	22202	22519
chrI	24406	24679
chrI	27077	27279
chrI	33663	34452
chrI	34657	35194
chrI	40240	41365
chrI	43012	43564
chrI	46467	47230
chrI	52096	52330
chrI	52459	52700
chrI	65075	65328
chrI	65460	68209
chrI	69891	70371
chrI	85772	86880
chrI	87563	88295
chrI	91054	91911
chrI	92124	93926
chrI	94881	95361
chrI	96045	96676
chrI	108065	109490
chrI	109564	111746
chrI	111855	112832
chrI	113258	113690
chrI	114536	115499
chrI	128171	129372
chrI	129809	131752
chrI	134856	135260
chrI	136662	137072
chrI	168011	168309
chrI	171939	172335
chrI	179005	180408
chrI	182859	183537
chrI	186383	188776
chrI	211059	211660
chrI	214403	216392
chrI	216448	217628
chrI	217722	218269
chrI	218650	221109
chrI	222553	223362
chrI	226423	227027
chrI	227152	227507
chrI	228988	230123
chrI	231721	232240
chrI	232336	233046
chrI	233824	236872
chrI	237451	238793
chrI	238923	239163
chrI	247534	250152
chrI	250374	252822
chrI	254667	255550
chrI	279606	282322
chrI	285121	285465
chrI	304134	304453
chrI	309632	310156
chrI	310434	311086
chrI	314562	316428
chrI	318108	318623
chrI	323264	323764
chrI	332551	334127
chrI	334580	336684
chrI	336998	338144
chrI	338335	343136
chrI	347143	347909
chrI	353279	353609
chrI	354252	357061
chrI	358743	359101
chrI	364005	365247
chrI	366188	366534
chrI	367831	368722
chrI	377440	379551
chrI	381189	383011
chrI	385522	385716
chrI	388887	389337
chrI	393744	394269
chrI	395188	395549
chrI	396825	397189
chrI	397404	398125
chrI	398440	398649
chrI	413026	413424
chrI	432093	432384
chrI	443513	443921
chrI	461589	461840
chrI	462721	464381
chrI	464520	465153
chrI	465388	465691
chrI	466861	467109
chrI	487036	487805
chrI	488319	488598
chrI	489238	491489
chrI	493891	494205
chrI	494593	495695
chrI	497290	497563
chrI	500336	500565
chrI	500674	501496
chrI	501886	502973
chrI	504509	504901
chrI	505971	506982
chrI	509349	510243
chrI	510334	512113
chrI	512252	520161
chrI	520293	521054
chrI	533289	533880
chrI	534226	534452
chrI	535310	535678
chrI	535747	537547
chrI	538341	538977
chrI	542210	543398
chrI	543496	543899
chrI	545085	545718
chrI	547648	548218
chrI	548425	548892
chrI	549524	550313
chrI	551051	551338
chrI	557704	558260
chrI	560953	561306
chrI	564177	564532
chrI	596711	597318
chrI	606851	607363
chrI	609473	610025
chrI	614234	614661
chrI	616024	616524
chrI	624198	626870
chrI	626934	630653
chrI	630757	631430
chrI	636642	637123
chrI	637435	638197
chrI	639853	640177
chrI	640922	641263
chrI	645645	646823
chrI	647280	648227
chrI	648364	651921
chrI	652269	653327
chrI	659645	660044
chrI	662145	662441
chrI	663085	664238
chrI	665369	665814
chrI	666238	666556
chrI	669015	669258
chrI	669562	670344
chrI	670496	671807
chrI	677628	677862
chrI	680438	681139
chrI	689380	690093
chrI	691337	691966
chrI	692213	700861
chrI	700990	701356
chrI	701700	702439
chrI	711027	711755
chrI	713573	715121
chrI	716532	718823
chrI	718897	720796
chrI	720860	721405
chrI	721629	722035
chrI	724684	725325
chrI	725645	726248
chrI	731190	731481
chrI	736750	737577
chrI	737848	738189
chrI	738373	738678
chrI	749197	749910
chrI	753897	754848
chrI	759945	760348
chrI	761495	761884
chrI	762298	763286
chrI	766945	767617
chrI	769025	770337
chrI	776652	777319
chrI	777554	778468
chrI	779087	779371
chrI	780491	781217
chrI	781531	782502
chrI	784526	784803
chrI	788507	788962
chrI	803691	804129
chrI	807019	807579
chrI	824971	826500
chrI	833404	833880
chrI	835215	835564
chrI	836585	837342
chrI	843129	843742
chrI	844340	845080
chrI	846130	846401
chrI	847952	849147
chrI	852000	852543
chrI	852620	852891
chrI	853211	853469
chrI	871734	872137
chrI	872744	874687
chrI	876632	878263
chrI	882385	884455
chrI	885327	885581
chrI	887335	888248
chrI	888325	889785
chrI	890602	891075
chrI	891178	891419
chrI	891633	892155
chrI	901708	902039
chrI	904732	905079
chrI	905406	906040
chrI	906949	907342
chrI	907553	908509
chrI	908831	909264
chrI	909794	910069
chrI	912981	913841
chrI	915108	915383
chrI	915485	915746
chrI	916648	917297
chrI	933405	934797
chrI	937009	937302
chrI	946711	947048
chrI	948154	948536
chrI	949502	950375
chrI	967278	967542
chrI	973054	973653
chrI	980838	981530
chrI	983614	984073
chrI	991840	992196
chrI	1002039	1002232
chrI	1006163	1006886
chrI	1007614	1007901
chrI	1008684	1009367
chrI	1010641	1011402
chrI	1011897	1012228
chrI	1014303	1019157
chrI	1019216	1019691
chrI	1020092	1020332
chrI	1030688	1031449
chrI	1033417	1034836
chrI	1040978	1041291
chrI	1045748	1045971
chrI	1048714	1049372
chrI	1049601	1054169
chrI	1056486	1056859
chrI	1057956	1058362
chrI	1058512	1059027
chrI	1059660	1059948
chrI	1060009	1060779
chrI	1060924	1063043
chrI	1064760	1065808
chrI	1066626	1067311
chrI	1067579	1070247
chrI	1073449	1074252
chrI	1074846	1075764
chrI	1076385	1076866
chrI	1078615	1082126
chrI	1082370	1082718
chrI	1086170	1086522
chrI	1086925	1087241
chrI	1089132	1089688
chrI	1100158	1100429
chrI	1110187	1110529
chrI	1116804	1118261
chrI	1120878	1124853
chrI	1133664	1133978
chrI	1136021	1136397
chrI	1139835	1140344
chrI	1142592	1142840
chrI	1151191	1151487
chrI	1153845	1154412
chrI	1154502	1155553
chrI	1156435	1158147
chrI	1158244	1158804
chrI	1158945	1162863
chrI	1162935	1164087
chrI	1167882	1168662
chrI	1171003	1171528
chrI	1174441	1175163
chrI	1179579	1179986
chrI	1184516	1184822
chrI	1199236	1199713
chrI	1211001	1211356
chrI	1212867	1214417
chrI	1217740	1219723
chrI	1221919	1222342
chrI	1223574	1230996
chrI	1231158	1231737
chrI	1241289	1242073
chrI	1251406	1251928
chrI	1254984	1255297
chrI	1255690	1255917
chrI	1263397	1263673
chrI	1263753	1264682
chrI	1264812	1265962
chrI	1266040	1266349
chrI	1266830	1267238
chrI	1268209	1268578
chrI	1269360	1269620
chrI	1276709	1277115
chrI	1278496	1279258
chrI	1279853	1280424
chrI	1283131	1283377
chrI	1284043	1284748
chrI	1285574	1287243
chrI	1292383	1292596
chrI	1293631	1294193
chrI	1296061	1296793
chrI	1301118	1301602
chrI	1303491	1303823
chrI	1305040	1305350
chrI	1305655	1306067
chrI	1306125	1306390
chrI	1312322	1313868
chrI	1314356	1314668
chrI	1320631	1321401
chrI	1321499	1321835
chrI	1325084	1325259
chrI	1327932	1328585
chrI	1334089	1338261
chrI	1338336	1339457
chrI	1339612	1341238
chrI	1341318	1342344
chrI	1342835	1343216
chrI	1344483	1345210
chrI	1345437	1345889
chrI	1346092	1346563
chrI	1346832	1347991
chrI	1358692	1359777
chrI	1360665	1361525
chrI	1361798	1363678
chrI	1364124	1366032
chrI	1366255	1366837
chrI	1367320	1369256
chrI	1369350	1369910
chrI	1370220	1373802
chrI	1375084	1375417
chrI	1376088	1376550
chrI	1399513	1399813
chrI	1401602	1401808
chrI	1403900	1404188
chrI	1404553	1404862
chrI	1405320	1406201
chrI	1407703	1408588
chrI	1409562	1410407
chrI	1410971	1413004
chrI	1413085	1414284
chrI	1417894	1418407
chrI	1419338	1419644
chrI	1420006	1420556
chrI	1425195	1426989
chrI	1429230	1431365
chrI	1434396	1434840
chrI	1435192	1435810
chrI	1444014	1445271
chrI	1445465	1447264
chrI	1448729	1449440
chrI	1450134	1451063
chrI	1452181	1452618
chrI	1453116	1454117
chrI	1455211	1455840
chrI	1460964	1461348
chrI	1462026	1463314
chrI	1480475	1482366
chrI	1482479	1482868
chrI	1486316	1490306
chrI	1493303	1494549
chrI	1497837	1498151
chrI	1508658	1508930
chrI	1529217	1529792
chrI	1536462	1538192
chrI	1541355	1541633
chrI	1541886	1542285
chrI	1542426	1542817
chrI	1542903	1543475
chrI	1545365	1546460
chrI	1547597	1552502
chrI	1552585	1553439
chrI	1553498	1559523
chrI	1560065	1561676
chrI	1562393	1562980
chrI	1564021	1565310
chrI	1566813	1567359
chrI	1573060	1573622
chrI	1575472	1575846
chrI	1576772	1577265
chrI	1579549	1579786
chrI	1580171	1581349
chrI	1581522	1582064
chrI	1582364	1582828
chrI	1591732	1592089
chrI	1594268	1594722
chrI	1595599	1595959
chrI	1597008	1597336
chrI	1597894	1598750
chrI	1610902	1611486
chrI	1611772	1612107
chrI	1612344	1612847
chrI	1613034	1613313
chrI	1619106	1621099
chrI	1621168	1624135
chrI	1625073	1625365
chrI	1626008	1626260
chrI	1626782	1627094
chrI	1627274	1627616
chrI	1628068	1629334
chrI	1629572	1629972
chrI	1632536	1632903
chrI	1633672	1634505
chrI	1637642	1638593
chrI	1639330	1640089
chrI	1640265	1641525
chrI	1642961	1643869
chrI	1646469	1646708
chrI	1650005	1650324
chrI	1660950	1663551
chrI	1665451	1665657
chrI	1665880	1666286
chrI	1669008	1669563
chrI	1670369	1670821
chrI	1671405	1671836
chrI	1672140	1672937
chrI	1673091	1673801
chrI	1681817	1682639
chrI	1685940	1686183
chrI	1687239	1687597
chrI	1688785	1689470
chrI	1690921	1691795
chrI	1694852	1695427
chrI	1695672	1695909
chrI	1696022	1696914
chrI	1697054	1697429
chrI	1697527	1699860
chrI	1700194	1700763
chrI	1706648	1706882
chrI	1715578	1716097
chrI	1716514	1716896
chrI	1717071	1717721
chrI	1719429	1721438
chrI	1722529	1722851
chrI	1725433	1726037
chrI	1727597	1727948
chrI	1732344	1732597
chrI	1738955	1740320
chrI	1740719	1741293
chrI	1743518	1743738
chrI	1746248	1748128
chrI	1755552	1758866
chrI	1760777	1762400
chrI	1773004	1775098
chrI	1775287	1778482
chrI	1778600	1779446
chrI	1791690	1792020
chrI	1792125	1792559
chrI	1797157	1797620
chrI	1800041	1800483
chrI	1809508	1809984
chrI	1810271	1811108
chrI	1813601	1813877
chrI	1815102	1817379
chrI	1819355	1819647
chrI	1821591	1822143
chrI	1822352	1822692
chrI	1822846	1823559
chrI	1824644	1825354
chrI	1832631	1838686
chrI	1838796	1842638
chrI	1843614	1844372
chrI	1845612	1846001
chrI	1846811	1847116
chrI	1849109	1849451
chrI	1849685	1849932
chrI	1851134	1851654
chrI	1851930	1853205
chrI	1863347	1863701
chrI	1872214	1872766
chrI	1873693	1874111
chrI	1876854	1878413
chrI	1883724	1884136
chrI	1890391	1890577
chrI	1893970	1894923
chrI	1896144	1896375
chrI	1899708	1899950
chrI	1900587	1900899
chrI	1901316	1901560
chrI	1910936	1911253
chrI	1911491	1914985
chrI	1915067	1917267
chrI	1919115	1922127
chrI	1926508	1927230
chrI	1930769	1931066
chrI	1958447	1958683
chrI	1968555	1969142
chrI	1969416	1969907
chrI	1970176	1970526
chrI	1971316	1972379
chrI	1973168	1973659
chrI	1973718	1974148
chrI	1977735	1979847
chrI	1981018	1981833
chrI	1987480	1987727
chrI	1997726	1999797
chrI	2002152	2003603
chrI	2003918	2004185
chrI	2005185	2005621
chrI	2005897	2006554
chrI	2008257	2008455
chrI	2008744	2009260
chrI	2009346	2010323
chrI	2010399	2010738
chrI	2011221	2011516
chrI	2011602	2011982
chrI	2012290	2012573
chrI	2018595	2018958
chrI	2019170	2019507
chrI	2019713	2020162
chrI	2020775	2021459
chrI	2021719	2022244
chrI	2022444	2022757
chrI	2022902	2023160
chrI	2023980	2024492
chrI	2024656	2024873
chrI	2030506	2031324
chrI	2032129	2033067
chrI	2033124	2034397
chrI	2034892	2035560
chrI	2035714	2039639
chrI	2039728	2040690
chrI	2040991	2041780
chrI	2042570	2043074
chrI	2043202	2043454
chrI	2043779	2045501
chrI	2046250	2048182
chrI	2048367	2050302
chrI	2052942	2053720
chrI	2054515	2061021
chrI	2061229	2061557
chrI	2061689	2062280
chrI	2062445	2063128
chrI	2066219	2067075
chrI	2067599	2068141
chrI	2068596	2070972
chrI	2076562	2078826
chrI	2078937	2079337
chrI	2080256	2081357
chrI	2081727	2082489
chrI	2082635	2083407
chrI	2083482	2084472
chrI	2084749	2085516
chrI	2085651	2086235
chrI	2094383	2094964
chrI	2095431	2096182
chrI	2096273	2096859
chrI	2096986	2097244
chrI	2099986	2100638
chrI	2113273	2113540
chrI	2115122	2117742
chrI	2117799	2118993
chrI	2119316	2120121
chrI	2120309	2121504
chrI	2121922	2122800
chrI	2124605	2124875
chrI	2126764	2127017
chrI	2127119	2127368
chrI	2127524	2128012
chrI	2128927	2129203
chrI	2129473	2129788
chrI	2132836	2133639
chrI	2140731	2141186
chrI	2143247	2144935
chrI	2145279	2145750
chrI	2146649	2146875
chrI	2154231	2154579
chrI	2154965	2155327
chrI	2155483	2156879
chrI	2169745	2170730
chrI	2171574	2172153
chrI	2175765	2176471
chrI	2192024	2192754
chrI	2203398	2203925
chrI	2205189	2206428
chrI	2231608	2231853
chrI	2248954	2250292
chrI	2250994	2251217
chrI	2254924	2255889
chrI	2272221	2272804
chrI	2273094	2273886
chrI	2279357	2280344
chrI	2290044	2291387
chrI	2291522	2295702
chrI	2295861	2298354
chrI	2299338	2300568
chrI	2300728	2303134
chrI	2306496	2307374
chrI	2311399	2312016
chrI	2315874	2317132
chrI	2318087	2319233
chrI	2321789	2323732
chrI	2330199	2330497
chrI	2334292	2336884
chrI	2336964	2338530
chrI	2339767	2340359
chrI	2363174	2364719
chrI	2373775	2374079
chrI	2375448	2375852
chrI	2375986	2377296
chrI	2377713	2378379
chrI	2380406	2381458
chrI	2383000	2383424
chrI	2383577	2383805
chrI	2385027	2385676
chrI	2386657	2386921
chrI	2387287	2387634
chrI	2389888	2390270
chrI	2393464	2394077
chrI	2401515	2401797
chrI	2403882	2405191
chrI	2406572	2406852
chrI	2407182	2407755
chrI	2408625	2409131
chrI	2409938	2410272
chrI	2410538	2410791
chrI	2411463	2412421
chrI	2415917	2416493
chrI	2417512	2418115
chrI	2418203	2418429
chrI	2418783	2420748
chrI	2421502	2422426
chrI	2423369	2423898
chrI	2427804	2428167
chrI	2431795	2433157
chrI	2435650	2436398
chrI	2453766	2454224
chrI	2456610	2457329
chrI	2464161	2464439
chrI	2477786	2478085
chrI	2485555	2485770
chrI	2486425	2487026
chrI	2489796	2490191
chrI	2493372	2494003
chrI	2495333	2496698
chrI	2502656	2502881
chrI	2506189	2507122
chrI	2514036	2514572
chrI	2514803	2515073
chrI	2532015	2532884
chrI	2538303	2538830
chrI	2554068	2554745
chrI	2578437	2578844
chrI	2579194	2579410
chrI	2579588	2580193
chrI	2580487	2581107
chrI	2581427	2582946
chrI	2583992	2585307
chrI	2585491	2586676
chrI	2586743	2589021
chrI	2591196	2591623
chrI	2598695	2599653
chrI	2604129	2604779
chrI	2605041	2605618
chrI	2617750	2618547
chrI	2619850	2620102
chrI	2620382	2620658
chrI	2622746	2623237
chrI	2626541	2629473
chrI	2630966	2633165
chrI	2639619	2639989
chrI	2642333	2642597
chrI	2647367	2647894
chrI	2656703	2657068
chrI	2663123	2663660
chrI	2667708	2668468
chrI	2680703	2682186
chrI	2687674	2689648
chrI	2689883	2690528
chrI	2695402	2695693
chrI	2704154	2704627
chrI	2705520	2706240
chrI	2706735	2707178
chrI	2711623	2712484
chrI	2716917	2717302
chrI	2724286	2724600
chrI	2727004	2731039
chrI	2731491	2732535
chrI	2736380	2737048
chrI	2752995	2753965
chrI	2754586	2755228
chrI	2758058	2758984
chrI	2759933	2760425
chrI	2760593	2761185
chrI	2762436	2762640
chrI	2772897	2773310
chrI	2776068	2777102
chrI	2777844	2778738
chrI	2822673	2823429
chrI	2827393	2827701
chrI	2830128	2832170
chrI	2832308	2832748
chrI	2835370	2835762
chrI	2855176	2856998
chrI	2857596	2857941
chrI	2858662	2858951
chrI	2860827	2862034
chrI	2865122	2865688
chrI	2865762	2867098
chrI	2867235	2868292
chrI	2868495	2870761
chrI	2874955	2877724
chrI	2877864	2878824
chrI	2889763	2890502
chrI	2890652	2891042
chrI	2895051	2895355
chrI	2900989	2901238
chrI	2902403	2902720
chrI	2905144	2905913
chrI	2906600	2906821
chrI	2919881	2920281
chrI	2920366	2920633
chrI	2924756	2925474
chrI	2928050	2928665
chrI	2932952	2933352
chrI	2935590	2935897
chrI	2936367	2936790
chrI	2944632	2945220
chrI	2950474	2951109
chrI	2951840	2952770
chrI	2955928	2956255
chrI	2956355	2956582
chrI	2958992	2959843
chrI	2959935	2960475
chrI	2962963	2963194
chrI	2991691	2992036
chrI	2995562	2996931
chrI	2998468	2998926
chrI	2999290	2999683
chrI	2999902	3001062
chrI	3008064	3008288
chrI	3009710	3010221
chrI	3016901	3017251
chrI	3028039	3028409
chrI	3033798	3034105
chrI	3034326	3034722
chrI	3034845	3036250
chrI	3037922	3038608
chrI	3039829	3040269
chrI	3047897	3048220
chrI	3052326	3052685
chrI	3060964	3061231
chrI	3061470	3064725
chrI	3072880	3073382
chrI	3077081	3077377
chrI	3079729	3080022
chrI	3085193	3085874
chrI	3086118	3086567
chrI	3098228	3100162
chrI	3105322	3105918
chrI	3106007	3106604
chrI	3112761	3113083
chrI	3140924	3141455
chrI	3143448	3144387
chrI	3147495	3148167
chrI	3149595	3151990
chrI	3152070	3152994
chrI	3157484	3157930
chrI	3161393	3162695
chrI	3167411	3168026
chrI	3170202	3170573
chrI	3171609	3172450
chrI	3172777	3173176
chrI	3198723	3199226
chrI	3205264	3205697
chrI	3209319	3210161
chrI	3210368	3210691
chrI	3227876	3228299
chrI	3246214	3249877
chrI	3254443	3254777
chrI	3262676	3264034
chrI	3266502	3266926
chrI	3269098	3269323
chrI	3283445	3284028
chrI	3287553	3288277
chrI	3292052	3294118
chrI	3294190	3295014
chrI	3309664	3310140
chrI	3331333	3331752
chrI	3333978	3334847
chrI	3334934	3335302
chrI	3337950	3338512
chrI	3338739	3339103
chrI	3339164	3339860
chrI	3339975	3340225
chrI	3343762	3344070
chrI	3349377	3350151
chrI	3364946	3366484
chrI	3366888	3368874
chrI	3371466	3371706
chrI	3371972	3372958
chrI	3373066	3374659
chrI	3375731	3375945
chrI	3376011	3376330
chrI	3389901	3393762
chrI	3408328	3408937
chrI	3409479	3409662
chrI	3409809	3409987
chrI	3414412	3414808
chrI	3416918	3417422
chrI	3432201	3432944
chrI	3438611	3439737
chrI	3440083	3440807
chrI	3441576	3442064
chrI	3442306	3442772
chrI	3451517	3451810
chrI	3456122	3457023
chrI	3459689	3460394
chrI	3462994	3463381
chrI	3464239	3464481
chrI	3466726	3467483
chrI	3480121	3480522
chrI	3481470	3481681
chrI	3484611	3484828
chrI	3484919	3485135
chrI	3501964	3502171
chrI	3507440	3508334
chrI	3510715	3511188
chrI	3511974	3513126
chrI	3513677	3514717
chrI	3516361	3516588
chrI	3518801	3519135
chrI	3520386	3520548
chrI	3523504	3523920
chrI	3525246	3525562
chrI	3540102	3540580
chrI	3546865	3547171
chrI	3552093	3552449
chrI	3553180	3553654
chrI	3557479	3557909
chrI	3559359	3559648
chrI	3562940	3563544
chrI	3564260	3564924
chrI	3567343	3567690
chrI	3601499	3601867
chrI	3603867	3604051
chrI	3608281	3608509
chrI	3610557	3610808
chrI	3611149	3611369
chrI	3624330	3624589
chrI	3627543	3627735
chrI	3636589	3636768
chrI	3656893	3657424
chrI	3663021	3663277
chrI	3664126	3666186
chrI	3681168	3681461
chrI	3682025	3682801
chrI	3692781	3693127
chrI	3700555	3700878
chrI	3704943	3705283
chrI	3707415	3707683
chrI	3710043	3710527
chrI	3721327	3722762
chrI	3723356	3723766
chrI	3726190	3726920
chrI	3733605	3733998
chrI	3737270	3740898
chrI	3741193	3741424
chrI	3742704	3742907
chrI	3753517	3753763
chrI	3754447	3754979
chrI	3755904	3756103
chrI	3756807	3757227
chrI	3761385	3761649
chrI	3762243	3762487
chrI	3763172	3765934
chrI	3783566	3783795
chrI	3784341	3784754
chrI	3787699	3787887
chrI	3787969	3789050
chrI	3792905	3793195
chrI	3793278	3793778
chrI	3793869	3794443
chrI	3797417	3797947
chrI	3805986	3806209
chrI	3806912	3807210
chrI	3817340	3817709
chrI	3817799	3818055
chrI	3822334	3823032
chrI	3823236	3824029
chrI	3824114	3825307
chrI	3829344	3830146
chrI	3830302	3831584
chrI	3834719	3835162
chrI	3853296	3853493
chrI	3854983	3855342
chrI	3858783	3859288
chrI	3860514	3861324
chrI	3862235	3862795
chrI	3865928	3867041
chrI	3867257	3867766
chrI	3870186	3870877
chrI	3873862	3874084
chrI	3881404	3881662
chrI	3888501	3888957
chrI	3910872	3911228
chrI	3919287	3920151
chrI	3931448	3932427
chrI	3934598	3935369
chrI	3976289	3976683
chrI	3980059	3981282
chrI	3982736	3983467
chrI	3986232	3986903
chrI	3987223	3987697
chrI	3996644	3997235
chrI	4037500	4037741
chrI	4114507	4115270
chrI	4116414	4116665
chrI	4125453	4125728
chrI	4132214	4132772
chrI	4135311	4135618
chrI	4138742	4139601
chrI	4142855	4143070
chrI	4167742	4168441
chrI	4170205	4172841
chrI	4185145	4186970
chrI	4201176	4202040
chrI	4210716	4210913
chrI	4213122	4213635
chrI	4265915	4266137
chrI	4297591	4298454
chrI	4302313	4302554
chrI	4374923	4375937
chrI	4376051	4376303
chrI	4381741	4382583
chrI	4385208	4386762
chrI	4428147	4428383
chrI	4432072	4432450
chrI	4435390	4435668
chrI	4444388	4444594
chrI	4451014	4451227
chrI	4454953	4455431
chrI	4456772	4457525
chrI	4459592	4460758
chrI	4463003	4463347
chrI	4463481	4465445
chrI	4465558	4467365
chrI	4473978	4474191
chrI	4474815	4475342
chrI	4479369	4479985
chrI	4488287	4489282
chrI	4490042	4490940
chrI	4534915	4535143
chrI	4535534	4536536
chrI	4536984	4537488
chrI	4540377	4542185
chrI	4542400	4543749
chrI	4543924	4546347
chrI	4546521	4547754
chrI	4548184	4548526
chrI	4556835	4557401
chrI	4572843	4574757
chrI	4583173	4587317
chrI	4602902	4603160
chrI	4606908	4607075
chrI	4607206	4607994
chrI	4608226	4608786
chrI	4633566	4633790
chrI	4636500	4636967
chrI	4645143	4647573
chrI	4653009	4653435
chrI	4653765	4654351
chrI	4662328	4662760
chrI	4663325	4663706
chrI	4672157	4672411
chrI	4699230	4699965
chrI	4701136	4701699
chrI	4701808	4702103
chrI	4705985	4706214
chrI	4734097	4734595
chrI	4746768	4747930
chrI	4761436	4761606
chrI	4762494	4762664
chrI	4765425	4768411
chrI	4769211	4770160
chrI	4779455	4780024
chrI	4785157	4786448
chrI	4789607	4791585
chrI	4824533	4824714
chrI	4848697	4849198
chrI	4895604	4896038
chrI	4910910	4911152
chrI	4913907	4918382
chrI	4926439	4926694
chrI	4958474	4961079
chrI	4961133	4962317
chrI	4967568	4967818
chrI	5082127	5082554
chrI	5092354	5092613
chrI	5104717	5105200
chrI	5110157	5110636
chrI	5113671	5114046
chrI	5127377	5127746
chrI	5134123	5134461
chrI	5138002	5138269
chrI	5142440	5142779
chrI	5144465	5145716
chrI	5152602	5153181
chrI	5153236	5153892
chrI	5164891	5165140
chrI	5170530	5172743
chrI	5174998	5176576
chrI	5186370	5186721
chrI	5244207	5244385
chrI	5256479	5256883
chrI	5261588	5261858
chrI	5268582	5268896
chrI	5271074	5271282
chrI	5272637	5273294
chrI	5273818	5274482
chrI	5294316	5294841
chrI	5294921	5296120
chrI	5296470	5297207
chrI	5298019	5298658
chrI	5300053	5300839
chrI	5307846	5308608
chrI	5311476	5312473
chrI	5312780	5313968
chrI	5315852	5317046
chrI	5319472	5319686
chrI	5357092	5357386
chrI	5367656	5368681
chrI	5370708	5373434
chrI	5377301	5378046
chrI	5379734	5380149
chrI	5381107	5381519
chrI	5388304	5388712
chrI	5408182	5408942
chrI	5412523	5412744
chrI	5420257	5420690
chrI	5429793	5430253
chrI	5431740	5431951
chrI	5452479	5453701
chrI	5454125	5454461
chrI	5455113	5455347
chrI	5455422	5455698
chrI	5470936	5471300
chrI	5484319	5486088
chrI	5509261	5509615
chrI	5549901	5550719
chrI	5567189	5567492
chrI	5571236	5573203
chrI	5576836	5579654
chrI	5593963	5594254
chrI	5594970	5595221
chrI	5608867	5609241
chrI	5619194	5622132
chrI	5626039	5626274
chrI	5637731	5638161
chrI	5639124	5639772
chrI	5678642	5679121
chrI	5691622	5692479
chrI	5706912	5707119
chrI	5707824	5708062
chrI	5741611	5742035
chrI	5745735	5746398
chrI	5762771	5763362
chrI	5774405	5775984
chrI	5791596	5792111
chrI	5803703	5803916
chrI	5806988	5808089
chrI	5817905	5818400
chrI	5827021	5827669
chrI	5827755	5827988
chrI	5869777	5871618
chrI	5904239	5905143
chrI	5914655	5915227
chrI	5939507	5939788
chrI	5976686	5976947
chrI	5978430	5979128
chrI	5980288	5982576
chrI	5982861	5983084
chrI	5984724	5986661
chrI	6003060	6003280
chrI	6061028	6061438
chrI	6067614	6067922
chrI	6081264	6081702
chrI	6082702	6082929
chrI	6090995	6091306
chrI	6091460	6091928
chrI	6092053	6093750
chrI	6114915	6115431
chrI	6116177	6116504
chrI	6117910	6118406
chrI	6136494	6136716
chrI	6171299	6171708
chrI	6174960	6175412
chrI	6183797	6184125
chrI	6210786	6211178
chrI	6219565	6221193
chrI	6224200	6224964
chrI	6230224	6230570
chrI	6282400	6285208
chrI	6314753	6315112
chrI	6317058	6318432
chrI	6358482	6358765
chrI	6366207	6366667
chrI	6368083	6368337
chrI	6369635	6370094
chrI	6407302	6407537
chrI	6446505	6446790
chrI	6459314	6459860
chrI	6460793	6461032
chrI	6465912	6466154
chrI	6467592	6467914
chrI	6472101	6472739
chrI	6472902	6473481
chrI	6497343	6497777
chrI	6498017	6500159
chrI	6513765	6514159
chrI	6532960	6533553
chrI	6541958	6542169
chrI	6554532	6554957
chrI	6564281	6565321
chrI	6565377	6566147
chrI	6569082	6569744
chrI	6572594	6573250
chrI	6573364	6574444
chrI	6574596	6575124
chrI	6577630	6578113
chrI	6578263	6578856
chrI	6579808	6580742
chrI	6586060	6586289
chrI	6607814	6609888
chrI	6609941	6610794
chrI	6611206	6611544
chrI	6626802	6627019
chrI	6647453	6648585
chrI	6660093	6660432
chrI	6722017	6722235
chrI	6723110	6724761
chrI	6756399	6756665
chrI	6771943	6773987
chrI	6779214	6779629
chrI	6780062	6780409
chrI	6799462	6800021
chrI	6812210	6812486
chrI	6834971	6838622
chrI	6846764	6847636
chrI	6854168	6857843
chrI	6877996	6878204
chrI	6898152	6898761
chrI	6948746	6950243
chrI	6950479	6950955
chrI	6973670	6974135
chrI	6982227	6982489
chrI	7014372	7014650
chrI	7015673	7016181
chrI	7017820	7021131
chrI	7021216	7022041
chrI	7056131	7059921
chrI	7078987	7087030
chrI	7098128	7098419
chrI	7099656	7100179
chrI	7132447	7132853
chrI	7147342	7149273
chrI	7156558	7157280
chrI	7159247	7159450
chrI	7218134	7218345
chrI	7224259	7224458
chrI	7234434	7235272
chrI	7239210	7239780
chrI	7244810	7246222
chrI	7251617	7251917
chrI	7254627	7255461
chrI	7285896	7286184
chrI	7313990	7314662
chrI	7314927	7315372
chrI	7315619	7317829
chrI	7330784	7331100
chrI	7345169	7345392
chrI	7352080	7352403
chrI	7466958	7467207
chrI	7472393	7472743
chrI	7474320	7475801
chrI	7476826	7477122
chrI	7489109	7490507
chrI	7490583	7493371
chrI	7494118	7494441
chrI	7494607	7494912
chrI	7500231	7501465
chrI	7503596	7504081
chrI	7518055	7522156
chrI	7541980	7544363
chrI	7544440	7545323
chrI	7553306	7553802
chrI	7554667	7555333
chrI	7559428	7559978
chrI	7571156	7572080
chrI	7573084	7574335
chrI	7584477	7588811
chrI	7595053	7595355
chrI	7595483	7595926
chrI	7596904	7597392
chrI	7597668	7598365
chrI	7634042	7634486
chrI	7656471	7660676
chrI	7667743	7668098
chrI	7694615	7695448
chrI	7698901	7699792
chrI	7706846	7707615
chrI	7707754	7710345
chrI	7721785	7722567
chrI	7740456	7742489
chrI	7772613	7773803
chrI	7779730	7781594
chrI	7781861	7782181
chrI	7814442	7815654
chrI	7834918	7836175
chrI	7844734	7846844
chrI	7858525	7860016
chrI	7860143	7862694
chrI	7865439	7865803
chrI	7866037	7866812
chrI	7866888	7872621
chrI	7883862	7884038
chrI	7894512	7895614
chrI	7914705	7915135
chrI	7926322	7927112
chrI	7934413	7936322
chrI	7940448	7941270
chrI	7945565	7945879
chrI	7961814	7962322
chrI	7970126	7970471
chrI	7985055	7985283
chrI	8024612	8024811
chrI	8028512	8029003
chrI	8029324	8029752
chrI	8045759	8047318
chrI	8048348	8049101
chrI	8082842	8083093
chrI	8098477	8098873
chrI	8109245	8109661
chrI	8109807	8110060
chrI	8124426	8124755
chrI	8133660	8134077
chrI	8172120	8172333
chrI	8213063	8214857
chrI	8218522	8219084
chrI	8219190	8219444
chrI	8223016	8223364
chrI	8223666	8224112
chrI	8224323	8224552
chrI	8245315	8245780
chrI	8288207	8288392
chrI	8293916	8294142
chrI	8294384	8294929
chrI	8304460	8304873
chrI	8309270	8309824
chrI	8315205	8315562
chrI	8328233	8329902
chrI	8331148	8331444
chrI	8369732	8370198
chrI	8393571	8394320
chrI	8410955	8411566
chrI	8412311	8413161
chrI	8416217	8416430
chrI	8425664	8426069
chrI	8426787	8426999
chrI	8434308	8434891
chrI	8487296	8487677
chrI	8490831	8491462
chrI	8531527	8531702
chrI	8567273	8567464
chrI	8581992	8582414
chrI	8590524	8590973
chrI	8609667	8609916
chrI	8614940	8615330
chrI	8617071	8617348
chrI	8636964	8637576
chrI	8637761	8638220
chrI	8660031	8660432
chrI	8663930	8665134
chrI	8676296	8681357
chrI	8681624	8681847
chrI	8692508	8693049
chrI	8695809	8696525
chrI	8701915	8702580
chrI	8747419	8747670
chrI	8751471	8751834
chrI	8751956	8752146
chrI	8757715	8758185
chrI	8759057	8759262
chrI	8759648	8760075
chrI	8760400	8763364
chrI	8789247	8789723
chrI	8791761	8792725
chrI	8807881	8808462
chrI	8813354	8813583
chrI	8815750	8816226
chrI	8816460	8816669
chrI	8839051	8839441
chrI	8917496	8917998
chrI	8918269	8919046
chrI	8949044	8949426
chrI	8949883	8950104
chrI	8952185	8952389
chrI	8952873	8953271
chrI	8969759	8970288
chrI	8992605	8992931
chrI	9013977	9014414
chrI	9050907	9053156
chrI	9053305	9054207
chrI	9057582	9058143
chrI	9077342	9077580
chrI	9079999	9080274
chrI	9085865	9086142
chrI	9086278	9086487
chrI	9100104	9100643
chrI	9100788	9101079
chrI	9108714	9109009
chrI	9110725	9111233
chrI	9111506	9111949
chrI	9112302	9113521
chrI	9113807	9114165
chrI	9114626	9116423
chrI	9117701	9118245
chrI	9126994	9127244
chrI	9127780	9129131
chrI	9129372	9131770
chrI	9133355	9133621
chrI	9137927	9138221
chrI	9141690	9141894
chrI	9145379	9146917
chrI	9163384	9163815
chrI	9165500	9171640
chrI	9172066	9172857
chrI	9173659	9174355
chrI	9226495	9227119
chrI	9274619	9274905
chrI	9280091	9280314
chrI	9287060	9287404
chrI	9307070	9308159
chrI	9314699	9315257
chrI	9322415	9322794
chrI	9327391	9327794
chrI	9328335	9328588
chrI	9334593	9336545
chrI	9347006	9347225
chrI	9347638	9347952
chrI	9372703	9376167
chrI	9377831	9384848
chrI	9385085	9386432
chrI	9393659	9393903
chrI	9400237	9400468
chrI	9422259	9422658
chrI	9428758	9429907
chrI	9448050	9448329
chrI	9469018	9469417
chrI	9470575	9471428
chrI	9501578	9502259
chrI	9505345	9506305
chrI	9511960	9513425
chrI	9545821	9546428
chrI	9569086	9569321
chrI	9570073	9570274
chrI	9581482	9581766
chrI	9583156	9583677
chrI	9585092	9585660
chrI	9605416	9605966
chrI	9606724	9606976
chrI	9607514	9607872
chrI	9611515	9611814
chrI	9619836	9620290
chrI	9622391	9623218
chrI	9624106	9625241
chrI	9625320	9626562
chrI	9630454	9631446
chrI	9665126	9665542
chrI	9681420	9682818
chrI	9682959	9683198
chrI	9688753	9689016
chrI	9689155	9690514
chrI	9709465	9711063
chrI	9721515	9722675
chrI	9725259	9725744
chrI	9732643	9734457
chrI	9734654	9735793
chrI	9737397	9737637
chrI	9751989	9754319
chrI	9761003	9761235
chrI	9768287	9768549
chrI	9786439	9789338
chrI	9789928	9790565
chrI	9790718	9791480
chrI	9792657	9793958
chrI	9819784	9821336
chrI	9851451	9853285
chrI	9853348	9854409
chrI	9854629	9856161
chrI	9856260	9859975
chrI	9869094	9871334
chrI	9937795	9939904
chrI	9940217	9941629
chrI	9942076	9944634
chrI	9945011	9945802
chrI	9945947	9946729
chrI	9946941	9947484
chrI	9960107	9960408
chrI	9962040	9965249
chrI	9970130	9970402
chrI	9971376	9971699
chrI	9979754	9979995
chrI	9983491	9983835
chrI	9984907	9985355
chrI	9985604	9985849
chrI	9988260	9989828
chrI	10031635	10033285
chrI	10034901	10038559
chrI	10102285	10102624
chrI	10102718	10105254
chrI	10105348	10105846
chrI	10106064	10106433
chrI	10116852	10117117
chrI	10121853	10125638
chrI	10130537	10133137
chrI	10136993	10137702
chrI	10140981	10141219
chrI	10141823	10142057
chrI	10173100	10173366
chrI	10173755	10177441
chrI	10181452	10182008
chrI	10183933	10186224
chrI	10187237	10187908
chrI	10231511	10232068
chrI	10232415	10235599
chrI	10235713	10235938
chrI	10238743	10239321
chrI	10282047	10282341
chrI	10328690	10328910
chrI	10330548	10332154
chrI	10333571	10336402
chrI	10349727	10350071
chrI	10350642	10350858
chrI	10372818	10373108
chrI	10382820	10383014
chrI	10398635	10398999
chrI	10418017	10418986
chrI	10419226	10422667
chrI	10432343	10433780
chrI	10436044	10437706
chrI	10445784	10446083
chrI	10463654	10464292
chrI	10468819	10469573
chrI	10478508	10478799
chrI	10478947	10479247
chrI	10484749	10486607
chrI	10486666	10488099
chrI	10516700	10517329
chrI	10517969	10518183
chrI	10541324	10541561
chrI	10552210	10554677
chrI	10560040	10562267
chrI	10562495	10563074
chrI	10565059	10565730
chrI	10565882	10566426
chrI	10567568	10570715
chrI	10587788	10588733
chrI	10593021	10593416
chrI	10593763	10594786
chrI	10598483	10598729
chrI	10633751	10634532
chrI	10636017	10636531
chrI	10650989	10651487
chrI	10653535	10654005
chrI	10677997	10678439
chrI	10685235	10685815
chrI	10686936	10687302
chrI	10688455	10688895
chrI	10713245	10713497
chrI	10716587	10717909
chrI	10718000	10718541
chrI	10720166	10720707
chrI	10749806	10750334
chrI	10750532	10751261
chrI	10751472	10752436
chrI	10752576	10763416
chrI	10764990	10770288
chrI	10770568	10772762
chrI	10774297	10774812
chrI	10776555	10776983
chrI	10777182	10777711
chrI	10783805	10785697
chrI	10787019	10789731
chrI	10792985	10793570
chrI	10808119	10808503
chrI	10840792	10841046
chrI	10866653	10867291
chrI	10872987	10873300
chrI	10881169	10881400
chrI	10903616	10904034
chrI	10926356	10926808
chrI	10926959	10928031
chrI	10945952	10947100
chrI	10947449	10948085
chrI	10948358	10949108
chrI	10949239	10950276
chrI	10951244	10951861
chrI	10954277	10954591
chrI	10957617	10960350
chrI	10964533	10965966
chrI	10966535	10967073
chrI	10973079	10975637
chrI	10977458	10979020
chrI	10980274	10981328
chrI	11005516	11006030
chrI	11007629	11008158
chrI	11011570	11011991
chrI	11025890	11026749
chrI	11031801	11034378
chrI	11034968	11035394
chrI	11035585	11036367
chrI	11037023	11037567
chrI	11045635	11046219
chrI	11050237	11051384
chrI	11051508	11054017
chrI	11054100	11062440
chrI	11062594	11066167
chrI	11068413	11076827
chrI	11077359	11079762
chrI	11081403	11082137
chrI	11082445	11083366
chrI	11083531	11086424
chrI	11088042	11096290
chrI	11096668	11099063
chrI	11099247	11101555
chrI	11101703	11102579
chrI	11102787	11103453
chrI	11103649	11110236
chrI	11110837	11111245
chrI	11111611	11111918
chrI	11120431	11121236
chrI	11125662	11126042
chrI	11136871	11137375
chrI	11149234	11149605
chrI	11164208	11165967
chrI	11166071	11167872
chrI	11168394	11169138
chrI	11169261	11171442
chrI	11172111	11174798
chrI	11182375	11182756
chrI	11183770	11184713
chrI	11184822	11185817
chrI	11196363	11196774
chrI	11203124	11204389
chrI	11206308	11206630
chrI	11221885	11222449
chrI	11224623	11225575
chrI	11225838	11226263
chrI	11228825	11229096
chrI	11233760	11234274
chrI	11253528	11254365
chrI	11257118	11257656
chrI	11259490	11259758
chrI	11260852	11261246
chrI	11262195	11262990
chrI	11266490	11267264
chrI	11273646	11274880
chrI	11275147	11275624
chrI	11275807	11276300
chrI	11276583	11277440
chrI	11280647	11281094
chrI	11281447	11282366
chrI	11282784	11283418
chrI	11289314	11289558
chrI	11289837	11290348
chrI	11290452	11291211
chrI	11292037	11292639
chrI	11293658	11293905
chrI	11304080	11307449
chrI	11315840	11317023
chrI	11321359	11323117
chrI	11323191	11323619
chrI	11326037	11326852
chrI	11328917	11330790
chrI	11330936	11331149
chrI	11331491	11333027
chrI	11335180	11335545
chrI	11357391	11357651
chrI	11363993	11366931
chrI	11367068	11368171
chrI	11369669	11372094
chrI	11372695	11373584
chrI	11377287	11377856
chrI	11380494	11388618
chrI	11388823	11389990
chrI	11390135	11393249
chrI	11393758	11394817
chrI	11395209	11396411
chrI	11396528	11399778
chrI	11400580	11402326
chrI	11406610	11408050
chrI	11408229	11408648
chrI	11408791	11409113
chrI	11416555	11416870
chrI	11417067	11417717
chrI	11420054	11421097
chrI	11438894	11440644
chrI	11450329	11450582
chrI	11453373	11453778
chrI	11467664	11468037
chrI	11470830	11471099
chrI	11479848	11481625
chrI	11485592	11488358
chrI	11504994	11505395
chrI	11505915	11506275
chrI	11507883	11508139
chrI	11517211	11517536
chrI	11518489	11522041
chrI	11525868	11526642
chrI	11526980	11528258
chrI	11529853	11530297
chrI	11531047	11534468
chrI	11537054	11537821
chrI	11545751	11546160
chrI	11552824	11553129
chrI	11556938	11557625
chrI	11576605	11577938
chrI	11579604	11579864
chrI	11580212	11580417
chrI	11580556	11580974
chrI	11584693	11586658
chrI	11597530	11598187
chrI	11598304	11598974
chrI	11599288	11600285
chrI	11602334	11602615
chrI	11602919	11603854
chrI	11604234	11604492
chrI	11606988	11607305
chrI	11607625	11608305
chrI	11608385	11609727
chrI	11612010	11613130
chrI	11613223	11614017
chrI	11614163	11614371
chrI	11615087	11616031
chrI	11627848	11628954
chrI	11649280	11650047
chrI	11652154	11652516
chrI	11655636	11656481
chrI	11656742	11657855
chrI	11661032	11661553
chrI	11664815	11665118
chrI	11667739	11668715
chrI	11672955	11673435
chrI	11676835	11678721
chrI	11679688	11679905
chrI	11681359	11681703
chrI	11684417	11685127
chrI	11685260	11685611
chrI	11686221	11687359
chrI	11689616	11690067
chrI	11693631	11694277
chrI	11728694	11729139
chrI	11742900	11743241
chrI	11745098	11747422
chrI	11762996	11763650
chrI	11763887	11764301
chrI	11781333	11782679
chrI	11792267	11793661
chrI	11798711	11799105
chrI	11801431	11801744
chrI	11803211	11803748
chrI	11805220	11805600
chrI	11830523	11830884
chrI	11837104	11837314
chrI	11839616	11839838
chrI	11841565	11841907
chrI	11842190	11842446
chrI	11842751	11843062
chrI	11843931	11844220
chrI	11851708	11852869
chrI	11853117	11853430
chrI	11861100	11862091
chrI	11868337	11868598
chrI	11868858	11869281
chrI	11869428	11873010
chrI	11874068	11875458
chrI	11876627	11876846
chrI	11876990	11877335
chrI	11878208	11878472
chrI	11885905	11886630
chrI	11896370	11896818
chrI	11903391	11903724
chrI	11905524	11906805
chrI	11908900	11911243
chrI	11924404	11924840
chrI	11930024	11930265
chrI	11930389	11932289
chrI	11933277	11933641
chrI	11934013	11934419
chrI	11946204	11946833
chrI	11947076	11947651
chrI	11949722	11950082
chrI	11950940	11951325
chrI	11951702	11952809
chrI	11964436	11965375
chrI	11965659	11966211
chrI	11967779	11968038
chrI	11969952	11970522
chrI	11975081	11975495
chrI	11977693	11978170
chrI	11984570	11984867
chrI	11987073	11987702
chrI	11990600	11990841
chrI	11995766	11998138
chrI	11998649	11999713
chrI	12006364	12006760
chrI	12008100	12008392
chrI	12009732	12010288
chrI	12017186	12017456
chrI	12020773	12020962
chrI	12033065	12033353
chrI	12039394	12040368
chrI	12040709	12041029
chrI	12043198	12045088
chrI	12045918	12046360
chrI	12046573	12047225
chrI	12048774	12049939
chrI	12054816	12055650
chrI	12065206	12066016
chrI	12066838	12067166
chrI	12067655	12067899
chrI	12068600	12069035
chrI	12071487	12071907
chrI	12077787	12079133
chrI	12093494	12094266
chrI	12105922	12106597
chrI	12134367	12134894
chrI	12135132	12135421
chrI	12141598	12141840
chrI	12142077	12142624
chrI	12144556	12145475
chrI	12146466	12146750
chrI	12149243	12150033
chrI	12163040	12163489
chrI	12168685	12169360
chrI	12173445	12174195
chrI	12177823	12178157
chrI	12182905	12183414
chrI	12183784	12184269
chrI	12184811	12185141
chrI	12185644	12186073
chrI	12189054	12189844
chrI	12194227	12194467
chrI	12197988	12198889
chrI	12199138	12199912
chrI	12202381	12202670
chrI	12206561	12207165
chrI	12209512	12209978
chrI	12212116	12212550
chrI	12212717	12213338
chrI	12213399	12215491
chrI	12219002	12219368
chrI	12222802	12223068
chrI	12223824	12224385
chrI	12225120	12226252
chrI	12226343	12226726
chrI	12227159	12227437
chrI	12228324	12228722
chrI	12229050	12229505
chrI	12285521	12286163
chrI	12286259	12287258
chrI	12287608	12288666
chrI	12289363	12289773
chrI	12319879	12320188
chrI	12324100	12325164
chrI	12471227	12471693
chrI	12478598	12479921
chrI	12479993	12481391
chrI	12482837	12483522
chrI	12483614	12483956
chrI	12484039	12484342
chrI	12486798	12487105
chrI	12487607	12487862
chrI	12487960	12488830
chrI	12489144	12489496
chrI	12489734	12490196
chrI	12490403	12490742
chrI	12490927	12491500
chrI	12492327	12492869
chrI	12493367	12494236
chrI	12494575	12495966
chrI	12509676	12510190
chrI	12510588	12511637
chrI	12512360	12512808
chrI	12512873	12513300
chrI	12513355	12514306
chrI	12516498	12517885
chrI	12518049	12519582
chrI	12520307	12520634
chrI	12523246	12524035
chrI	12524181	12525626
chrI	12525782	12530727
chrI	12531370	12532510
chrI	12534934	12536464
chrI	12536532	12537331
chrI	12539161	12539790
chrI	12547954	12548570
chrI	12550589	12551411
chrI	12562882	12563156
chrI	12566210	12566794
chrI	12570969	12572085
chrI	12574888	12575488
chrI	12595492	12596368
chrI	12596551	12598078
chrI	12601408	12601865
chrI	12603336	12603657
chrI	12645800	12647289
chrI	12649191	12650061
chrI	12652160	12656219
chrI	12664942	12665251
chrI	12671098	12672225
chrI	12672810	12673742
chrI	12676966	12677310
chrI	12716940	12717533
chrI	12727371	12727620
chrI	12732700	12733198
chrI	12735191	12735674
chrI	12736617	12737221
chrI	12737314	12738632
chrI	12738881	12741372
chrI	12742772	12743082
chrI	12749403	12752490
chrI	12755087	12756581
chrI	12757234	12759458
chrI	12759605	12760059
chrI	12772072	12772477
chrI	12773044	12773715
chrI	12774063	12774582
chrI	12778233	12778499
chrI	12800094	12800482
chrI	12800910	12801155
chrI	12806807	12807081
chrI	12810859	12812211
chrI	12812732	12813759
chrI	12813988	12817866
chrI	12817990	12818476
chrI	12818715	12820429
chrI	12823959	12824478
chrI	12825474	12826860
chrI	12827496	12828100
chrI	12828336	12828946
chrI	12833560	12834038
chrI	12836022	12836357
chrI	12838599	12838889
chrI	12840006	12840554
chrI	12846212	12846445
chrI	12851973	12852846
chrI	12858405	12859280
chrI	12861320	12861985
chrI	12862656	12863642
chrI	12863974	12864168
chrI	12876046	12876777
chrI	12876967	12877416
chrI	12882556	12883332
chrI	12885644	12888209
chrI	12889232	12891467
chrI	12891625	12892410
chrI	12892535	12894060
chrI	12896335	12897239
chrI	12899515	12900089
chrI	12903572	12908020
chrI	12910299	12910656
chrI	12915023	12922699
chrI	12922989	12924618
chrI	12927143	12928946
chrI	12955906	12957376
chrI	12960026	12961154
chrI	12961808	12962635
chrI	12964107	12967637
chrI	12968246	12968695
chrI	12969640	12970753
chrI	12972666	12973683
chrI	12973777	12975626
chrI	12981087	12981422
chrI	12995482	12995901
chrI	13007459	13011786
chrI	13016230	13019132
chrI	13019640	13020106
chrI	13021020	13022641
chrI	13052537	13052853
chrI	13056492	13056708
chrI	13056768	13056988
chrI	13062570	13063248
chrI	13129436	13129841
chrI	13154153	13155249
chrI	13155418	13158521
chrI	13158648	13159262
chrI	13159508	13160839
chrI	13160910	13161207
chrI	13161696	13162445
chrI	13180828	13181077
chrI	13181188	13181911
chrI	13190374	13190929
chrI	13219958	13220376
chrI	13230384	13232748
chrI	13266026	13266242
chrI	13275840	13276942
chrI	13280634	13280873
chrI	13284255	13284693
chrI	13286174	13287779
chrI	13289766	13293050
chrI	13297195	13298342
chrI	13309569	13309946
chrI	13310022	13310993
chrI	13315413	13315806
chrI	13315882	13316213
chrI	13317035	13317472
chrI	13317935	13318306
chrI	13319837	13320114
chrI	13320383	13320660
chrI	13322344	13322599
chrI	13322923	13323654
chrI	13323940	13324354
chrI	13326065	13326416
chrI	13327280	13327545
chrI	13330808	13331286
chrI	13335331	13335579
chrI	13336222	13336742
chrI	13337107	13337436
chrI	13337605	13338698
chrI	13347584	13347996
chrI	13352911	13353285
chrI	13362892	13363351
chrI	13366550	13367896
chrI	13368032	13372137
chrI	13383395	13385374
chrI	13387523	13388118
chrI	13394622	13395021
chrI	13397248	13398375
chrI	13402032	13402434
chrI	13402737	13402965
chrI	13404226	13408453
chrI	13411363	13411740
chrI	13420900	13421330
chrI	13422303	13423109
chrI	13434266	13435135
chrI	13445799	13447702
chrI	13448088	13449941
chrI	13454445	13455899
chrI	13458547	13459975
chrI	13461190	13462759
chrI	13463721	13464349
chrI	13482880	13483538
chrI	13484318	13484618
chrI	13484681	13485352
chrI	13485446	13489562
chrI	13490645	13491010
chrI	13491457	13491948
chrI	13493392	13494091
chrI	13500169	13501216
chrI	13503411	13504181
chrI	13510366	13510714
chrI	13511298	13512727
chrI	13513447	13514993
chrI	13521021	13521552
chrI	13521669	13521965
chrI	13522081	13524747
chrI	13525475	13526200
chrI	13526284	13526484
chrI	13526903	13527084
chrI	13527862	13528374
chrI	13532472	13532729
chrI	13533580	13534130
chrI	13535991	13536911
chrI	13537048	13538647
chrI	13541791	13543014
chrI	13543331	13544541
chrI	13546393	13547680
chrI	13548140	13548563
chrI	13551725	13552396
chrI	13559697	13560949
chrI	13561197	13561560
chrI	13561739	13564724
chrI	13564793	13566253
chrI	13575126	13578098
chrI	13578538	13579418
chrI	13579999	13581826
chrI	13581941	13582961
chrI	13583491	13583974
chrI	13584393	13584645
chrI	13585972	13587273
chrI	13588730	13589116
chrI	13592980	13598585
chrI	13598668	13599399
chrI	13599498	13604426
chrI	13604653	13606716
chrI	13609877	13616720
chrI	13617218	13617430
chrI	13620085	13620562
chrI	13626040	13626985
chrI	13631910	13633287
chrI	13633343	13637823
chrI	13638132	13640513
chrI	13641206	13641849
chrI	13641937	13643014
chrI	13643159	13645539
chrI	13645788	13646035
[truncated: 8,985 more rows]
