# Supplementary figures and images for: A team of heterochromatin factors collaborates with small RNA pathways to combat repetitive elements and germline stress
Source: eLife journal article supplement (doi:10.7554/elife.21666), 2017-03-15

Enrichment of LIN-13 at repeat families

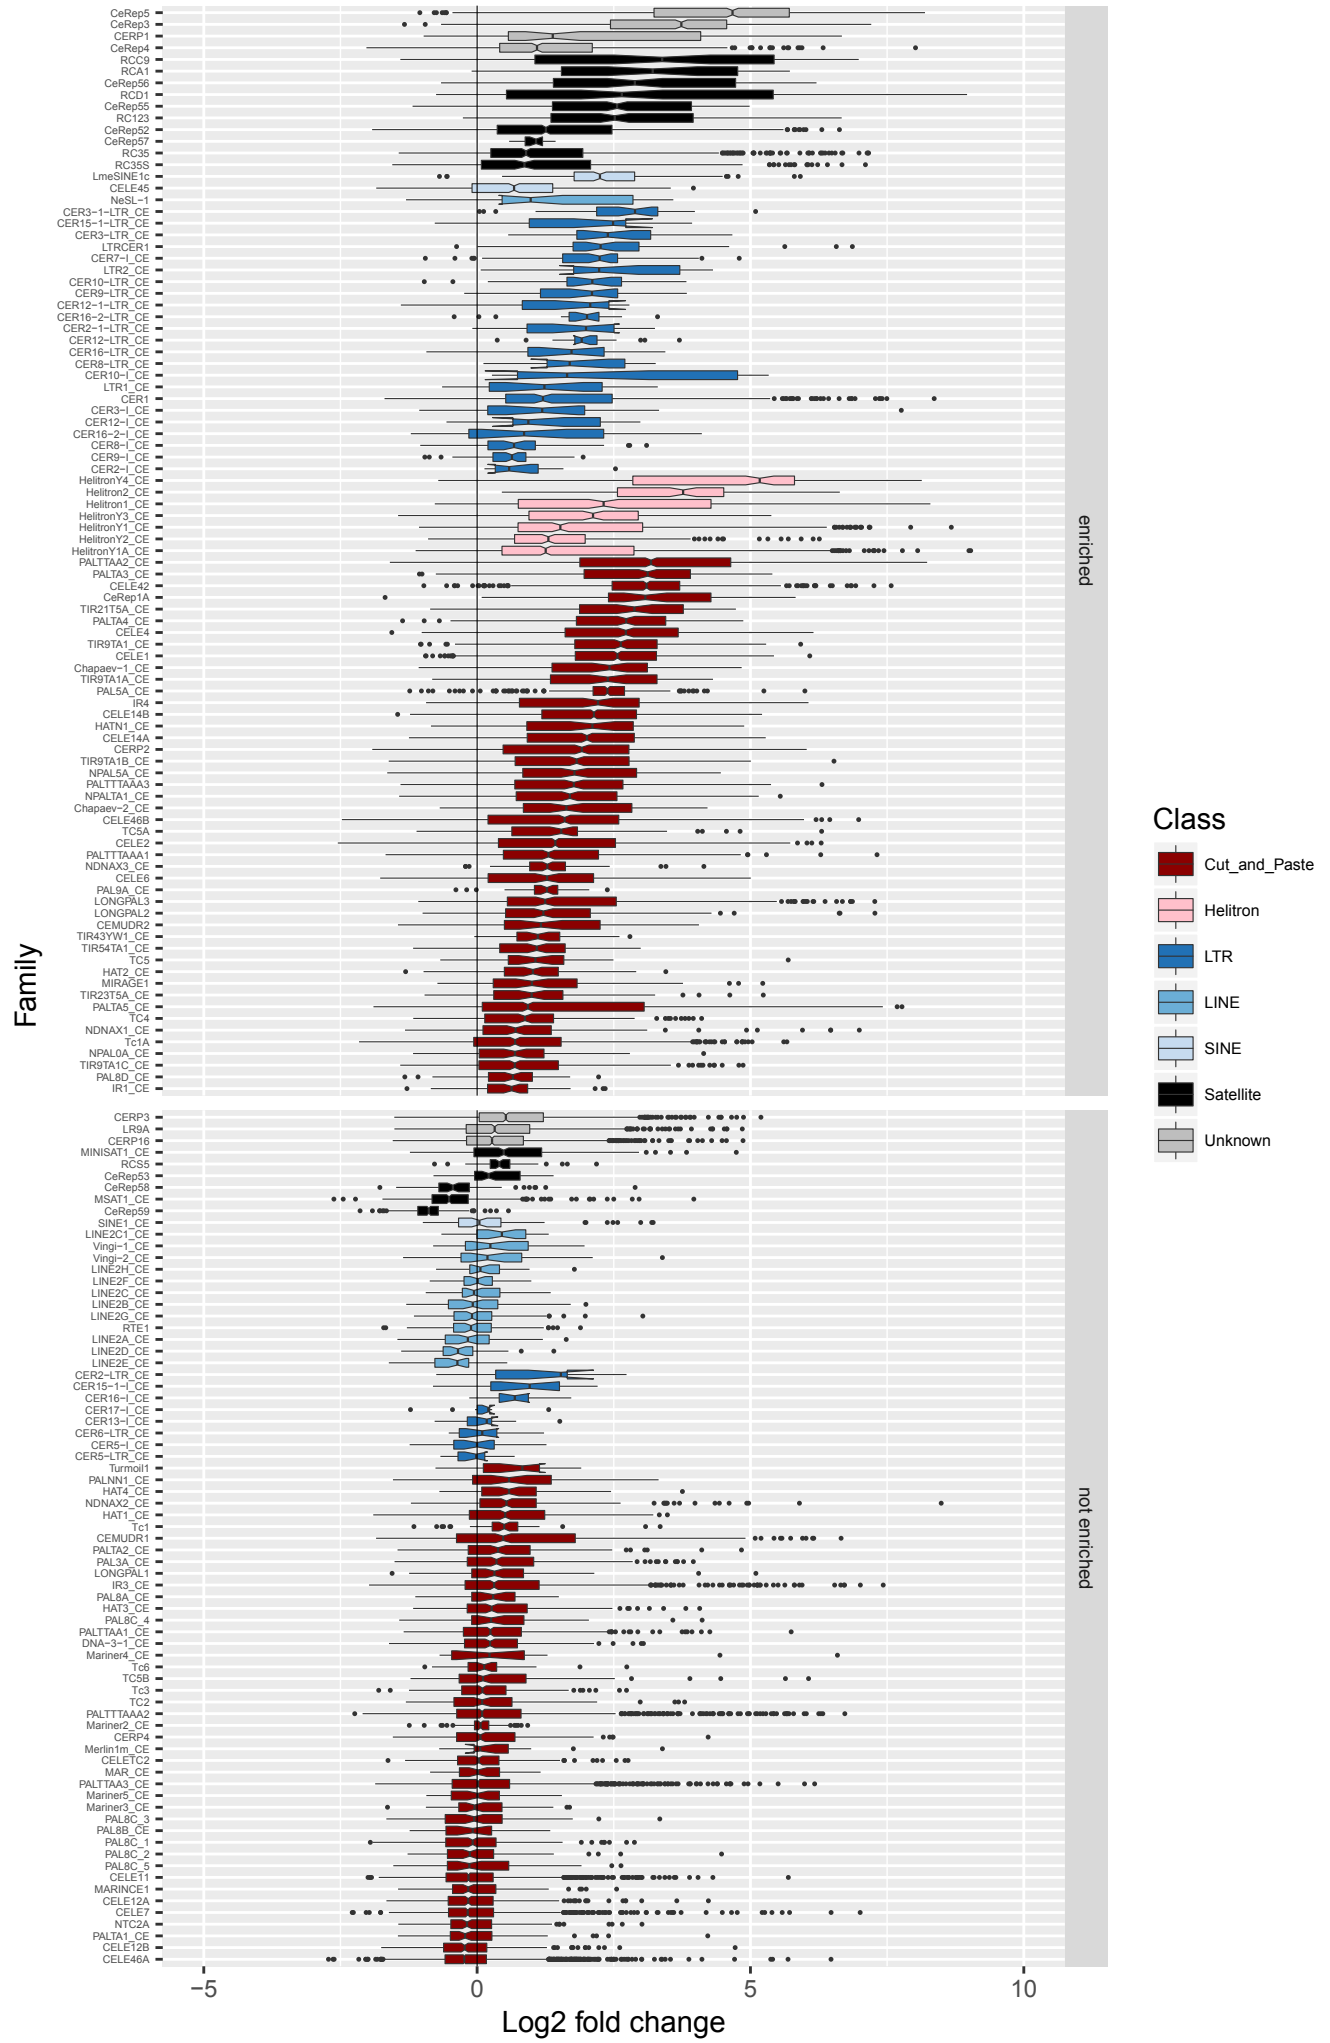

Supplement: supp [file elife-21666-supp-v1.zip]

Enrichment of H3K9me3 at repeat families

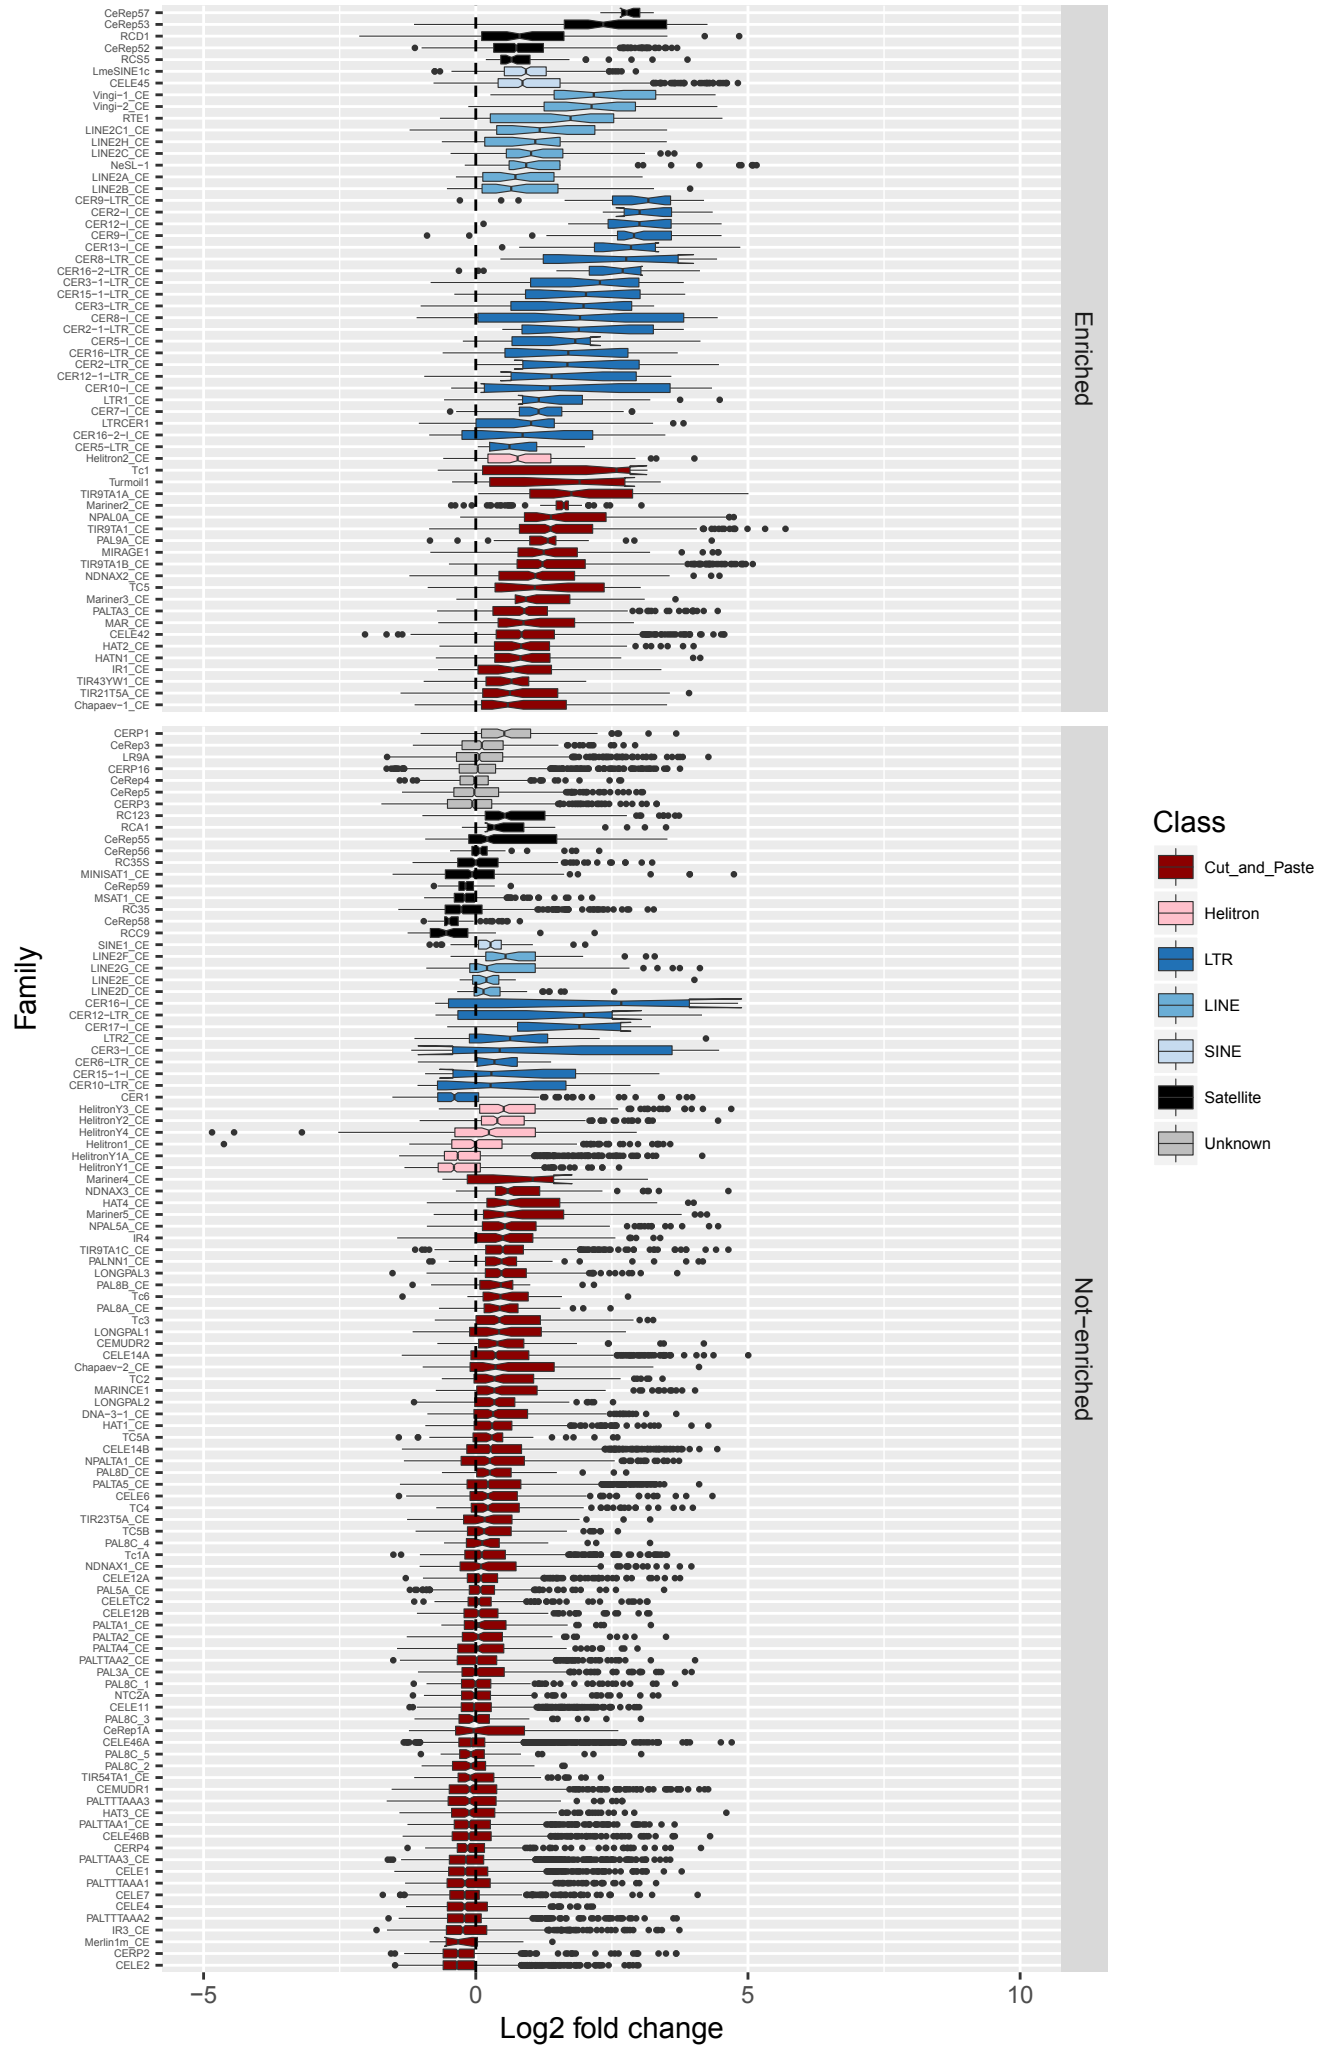

Supplement: supp [file elife-21666-supp-v1.zip]

### H3K9me3 log2 FC at genes

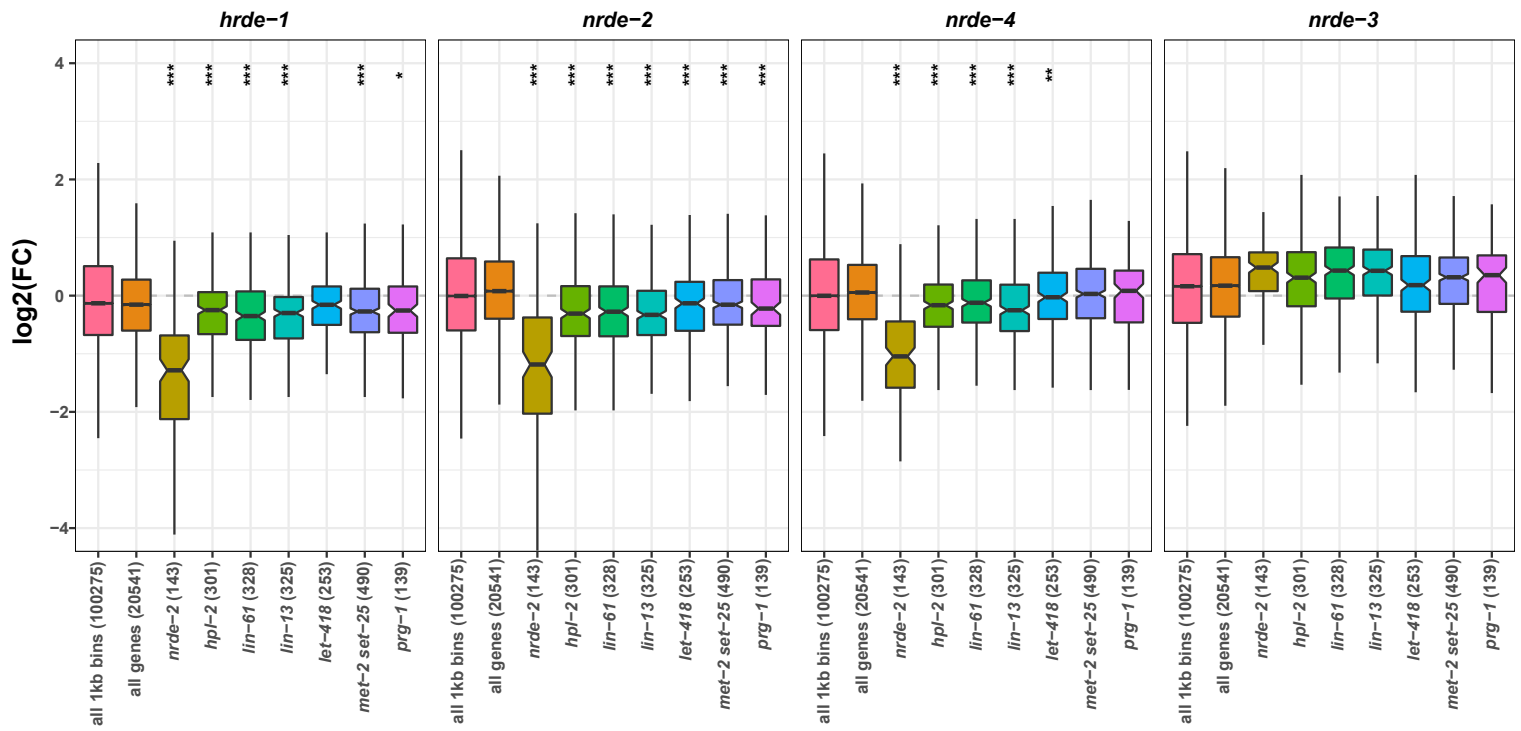

### H3K9me3 levels at genes

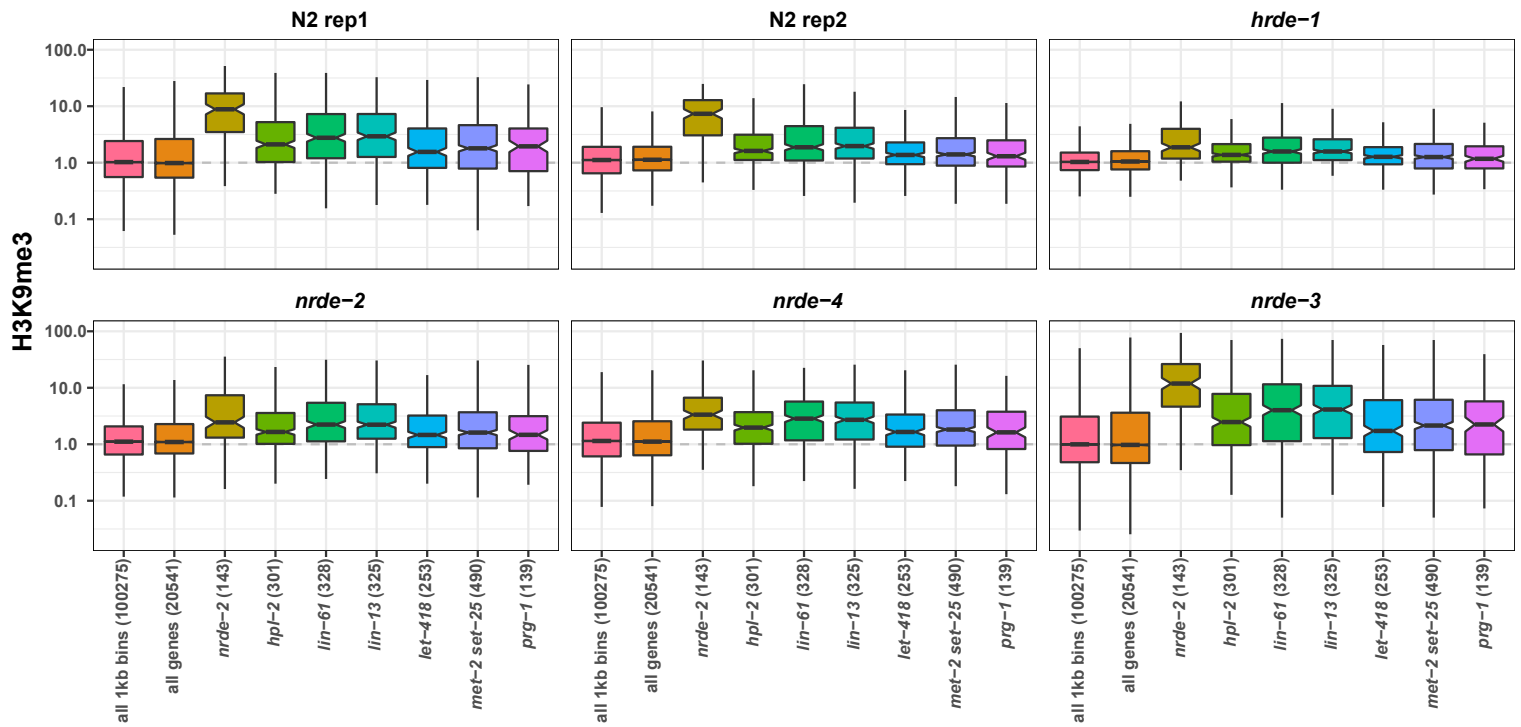

Figure 7-figure supplement 3

Supplement: supp [file elife-21666-supp-v1.zip]

## Enrichment of H3K9me2 at repeat families

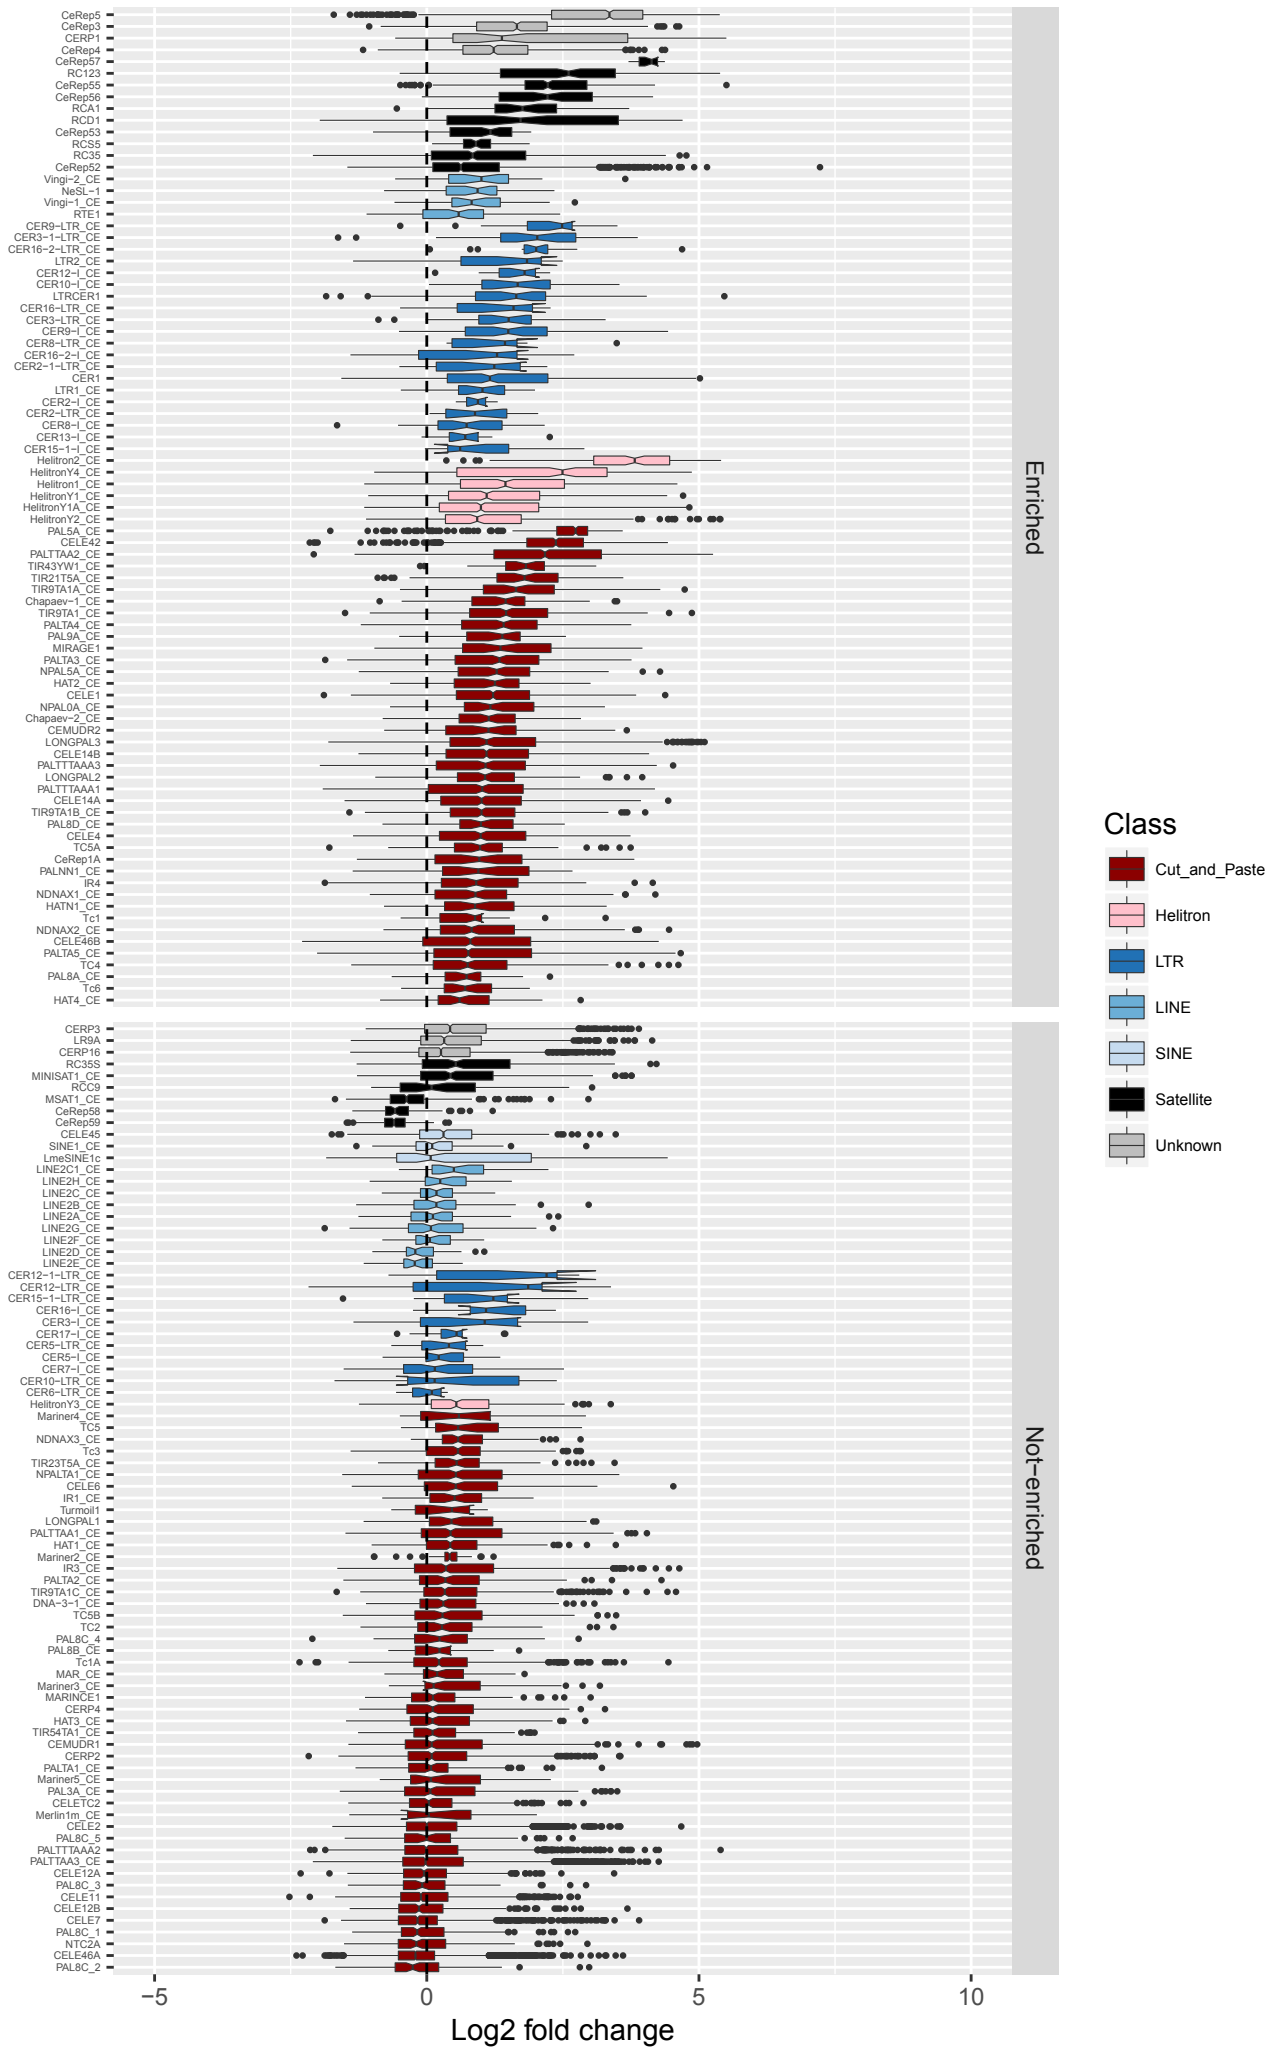

Supplement: supp [file elife-21666-supp-v1.zip]

Figure 3-figure supplement 1

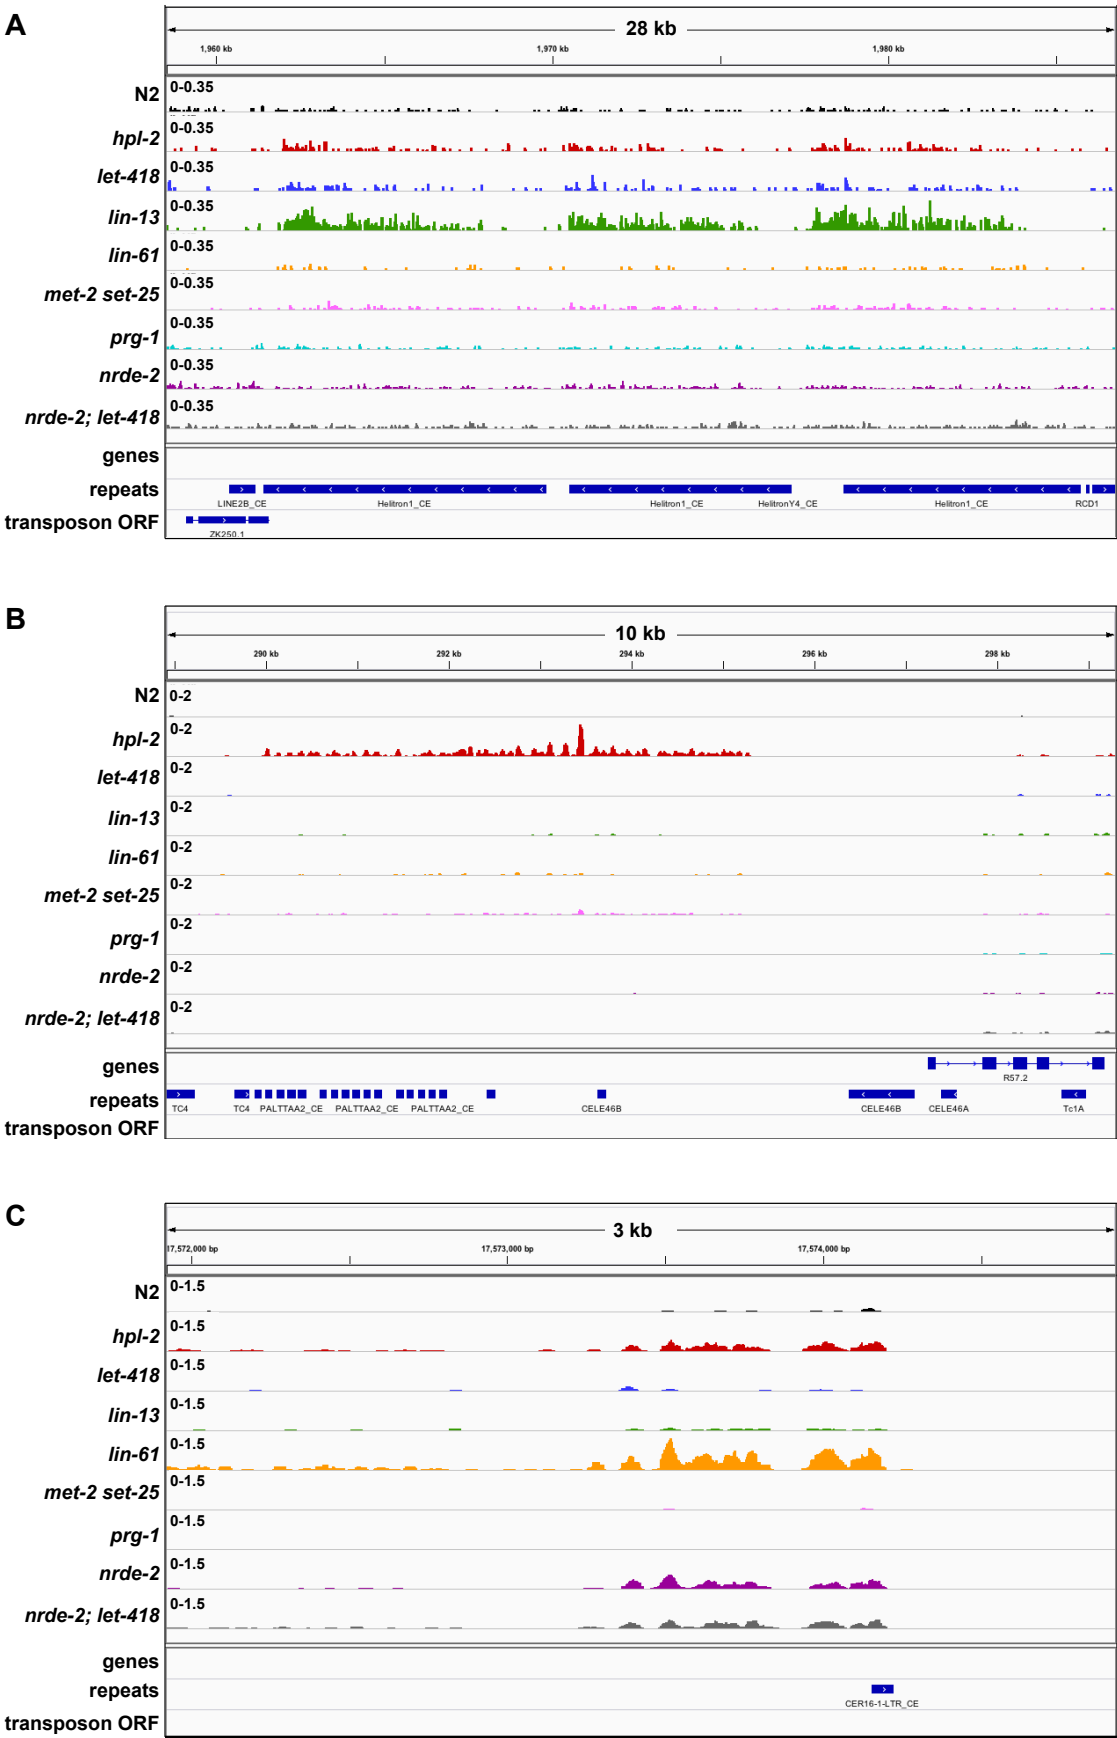

Supplement: supp [file elife-21666-supp-v1.zip]

Figure 3-figure supplement 3

A

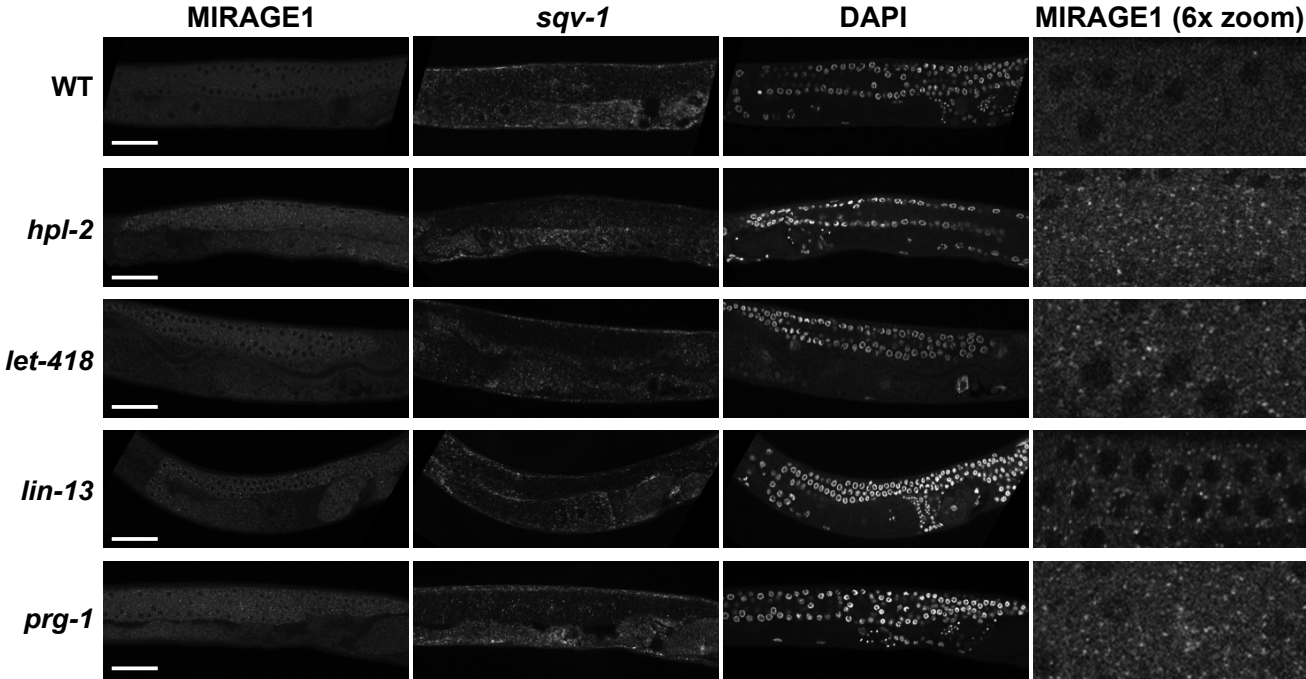

B

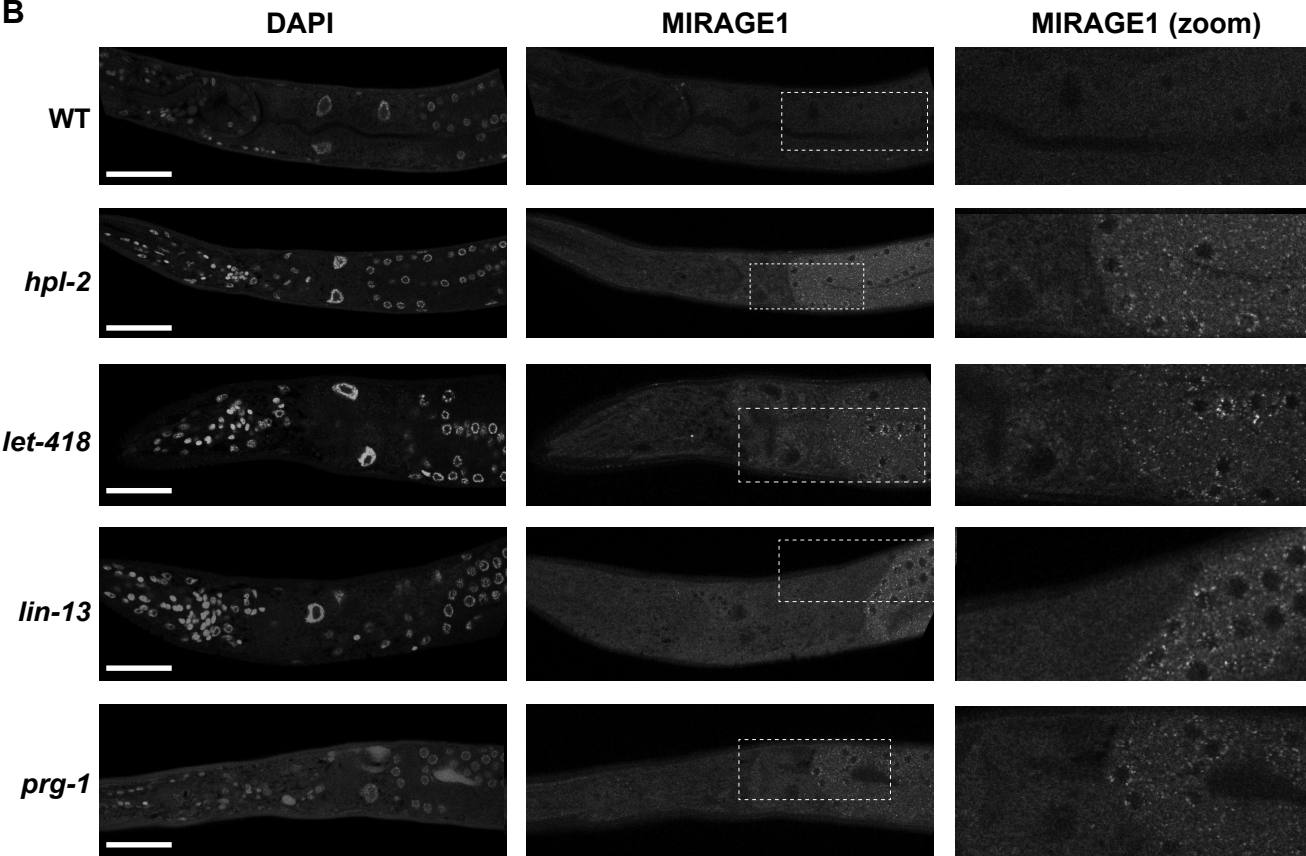

Supplement: supp [file elife-21666-supp-v1.zip]

Enrichment of LET-418 at repeat families

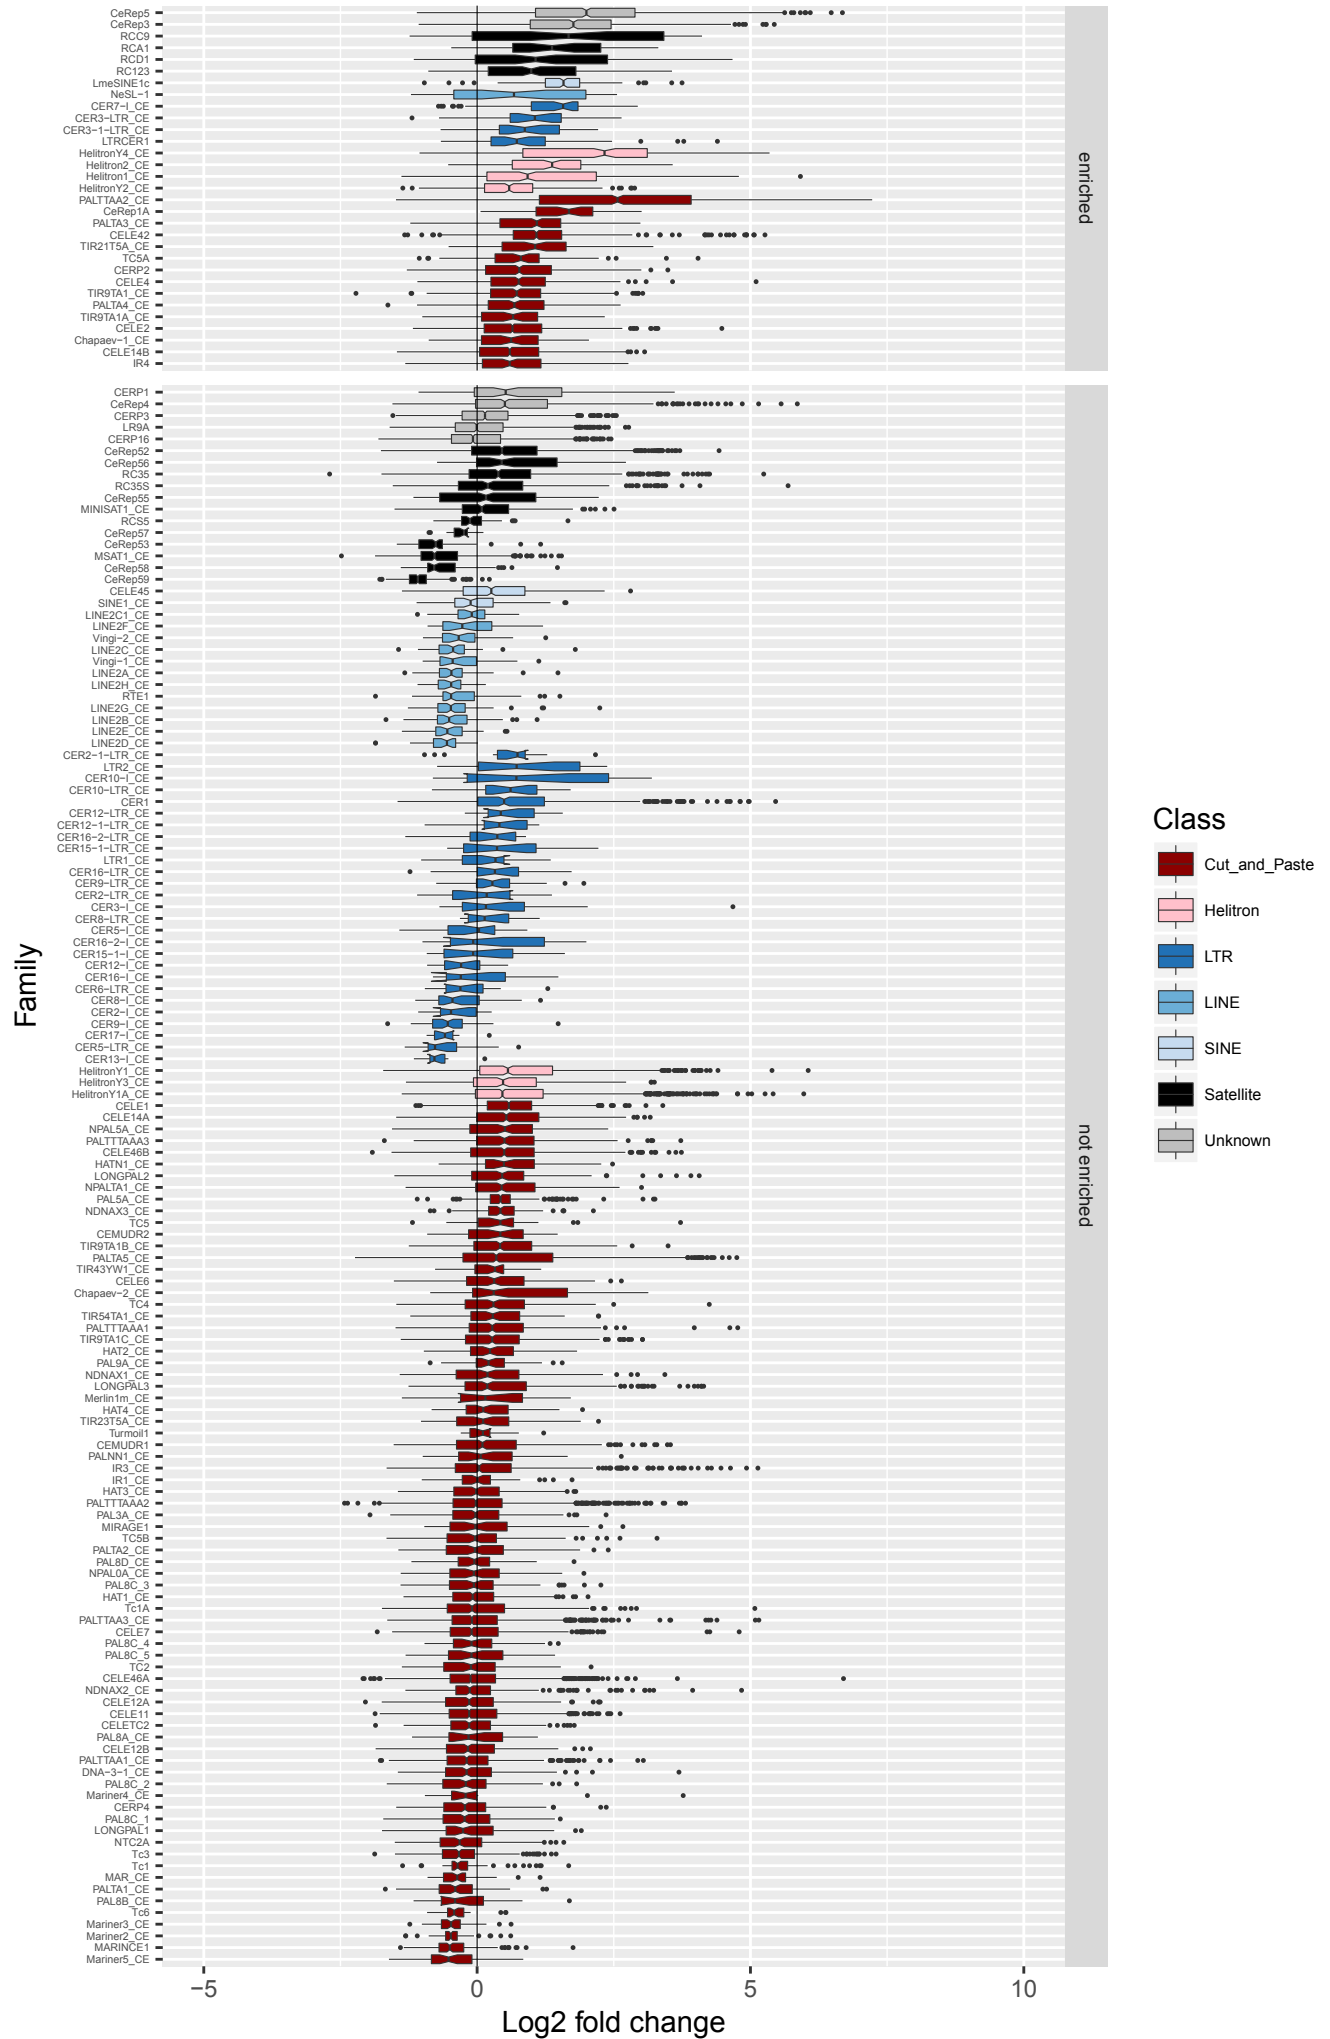

Supplement: supp [file elife-21666-supp-v1.zip]

Figure 1 - figure supplement 1

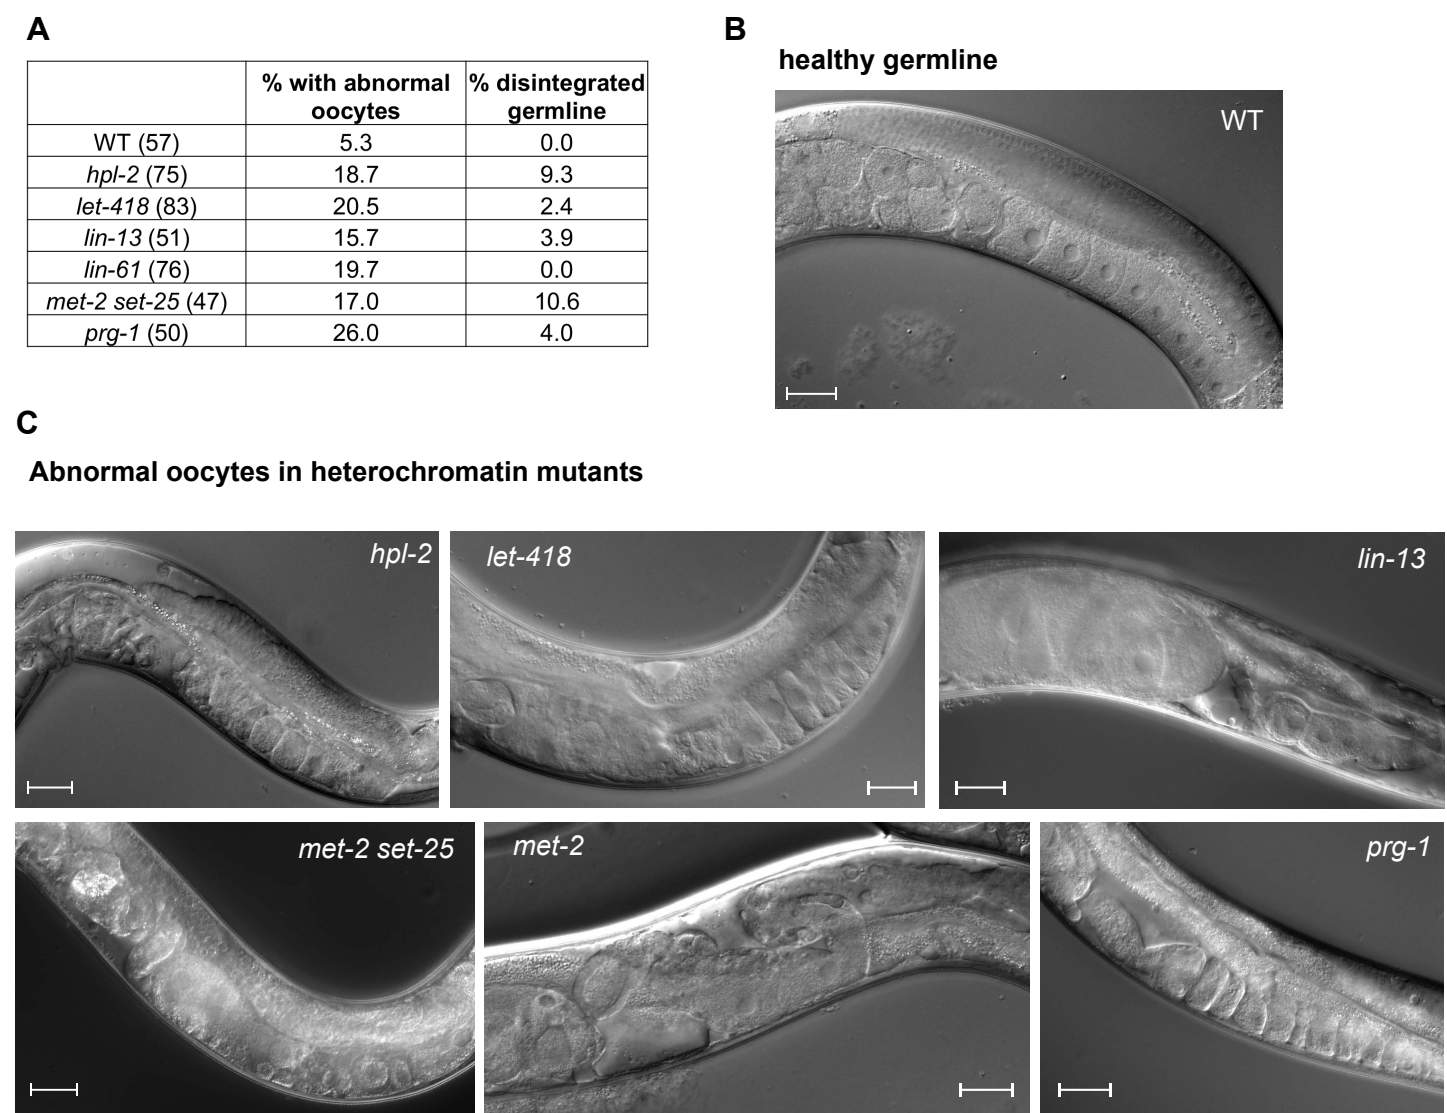

Supplement: supp [file elife-21666-supp-v1.zip]

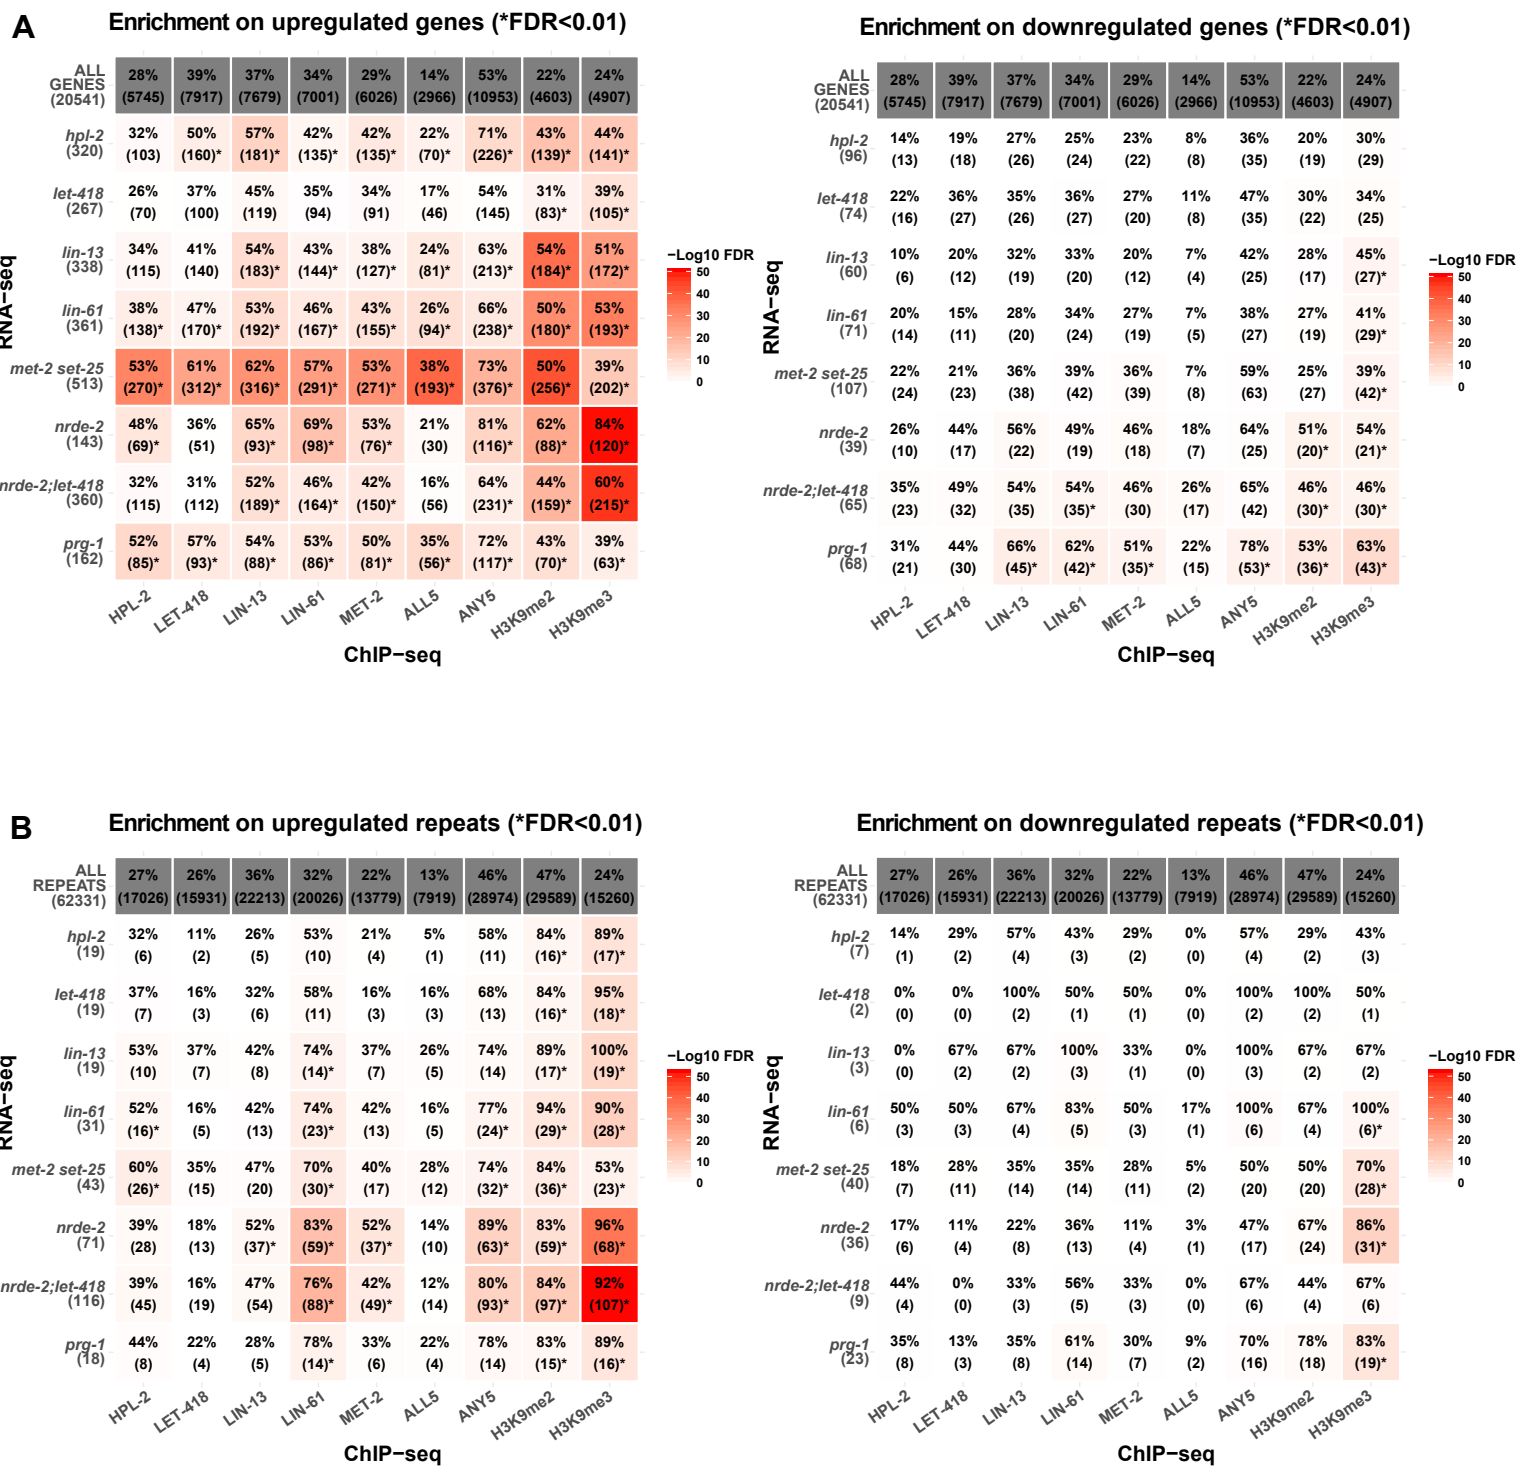

Figure 3-figure supplement 2

Supplement: supp [file elife-21666-supp-v1.zip]

Figure 5-figure supplement 1

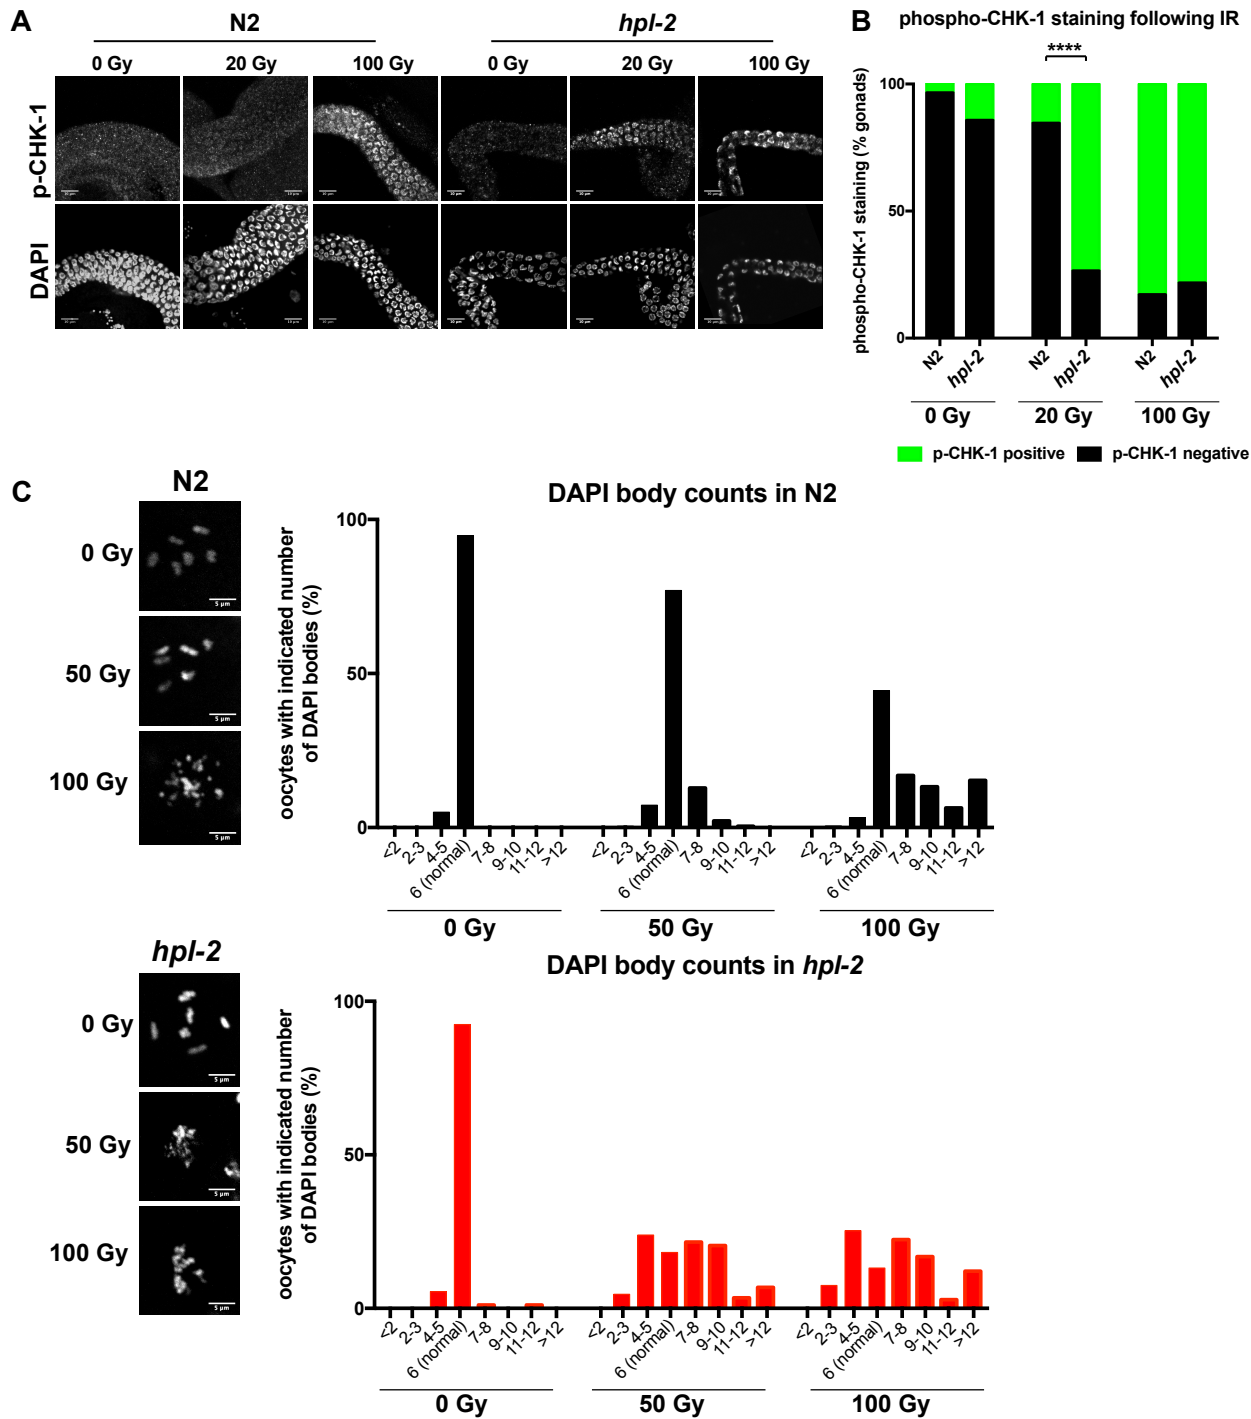

Supplement: supp [file elife-21666-supp-v1.zip]

Enrichment of HPL-2 at repeat families

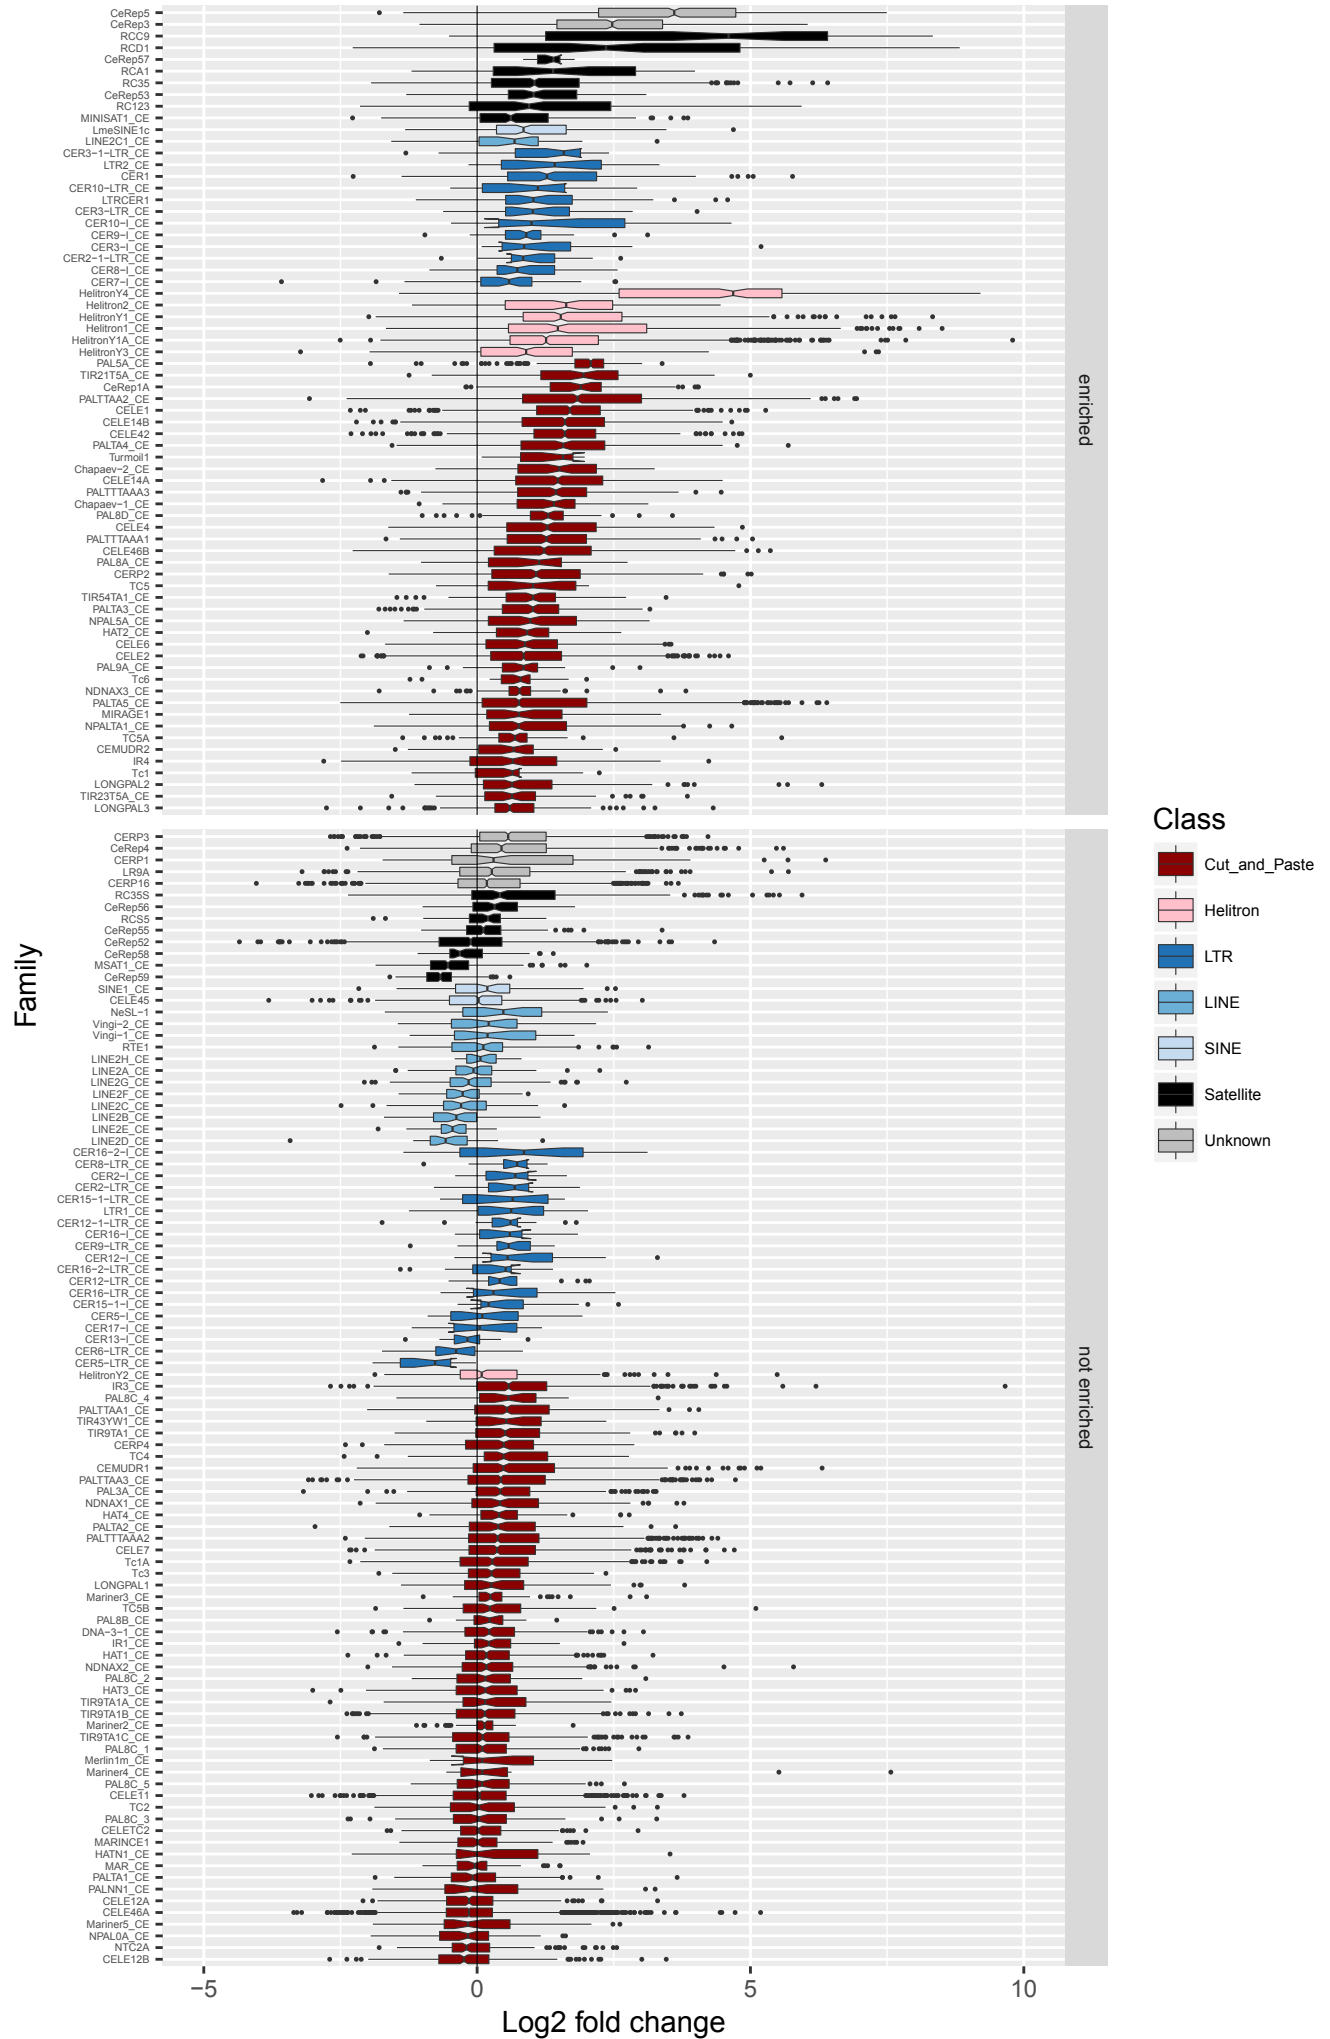

Supplement: supp [file elife-21666-supp-v1.zip]

## H3K9me3 log2 FC at repeats

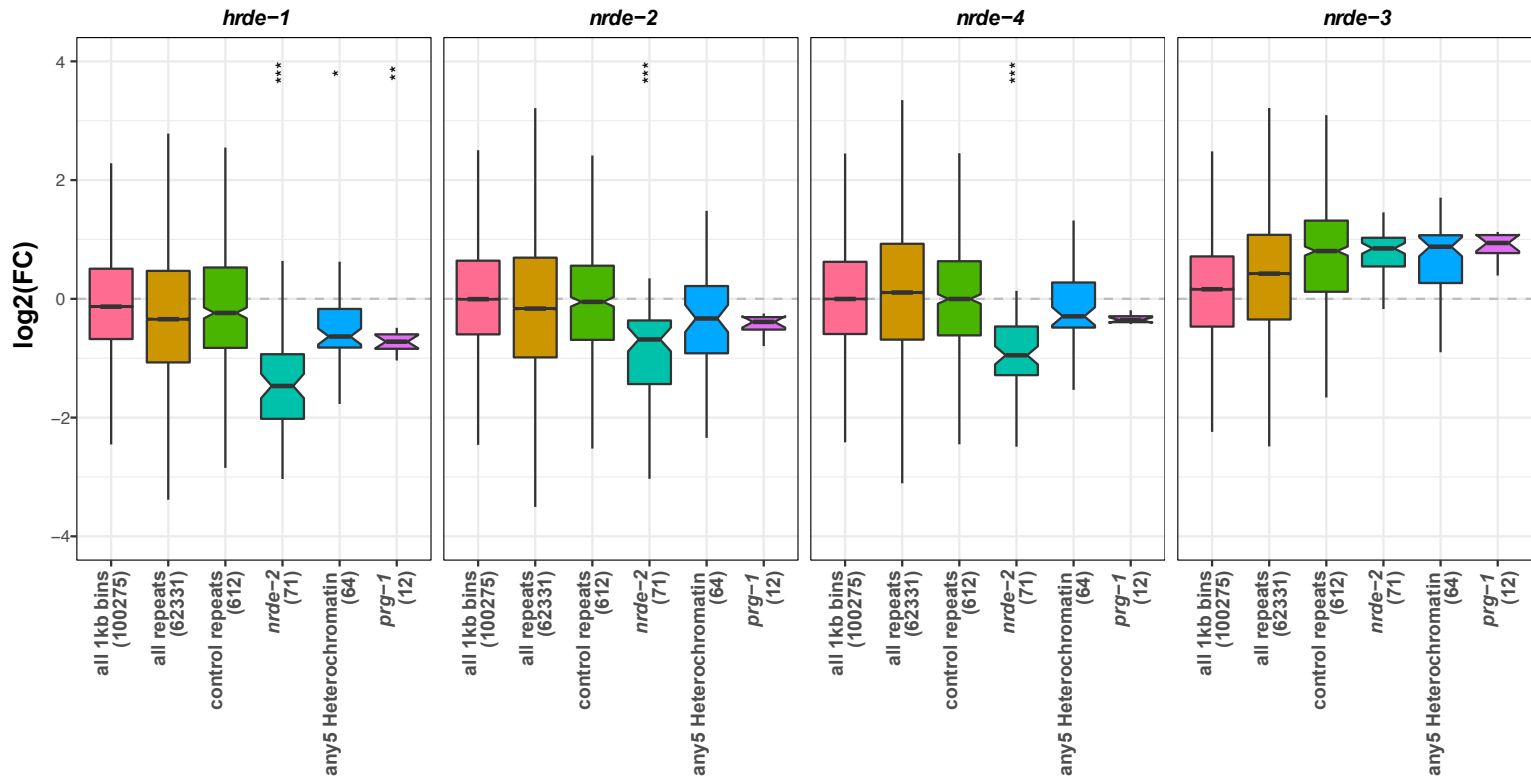

## H3K9me3 levels at repeats

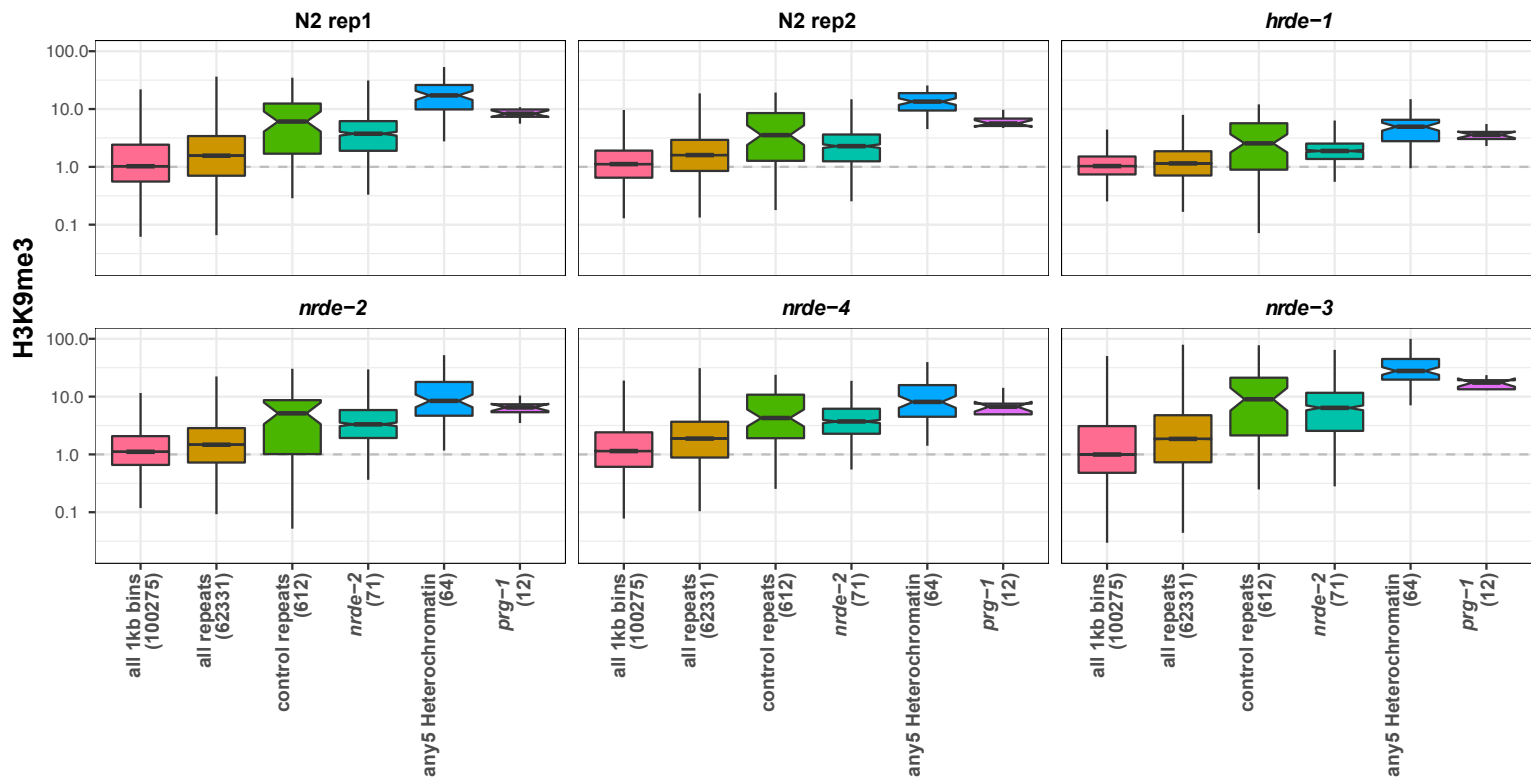

Figure 7-figure supplement 2

Supplement: supp [file elife-21666-supp-v1.zip]

Figure 2-figure supplement 1

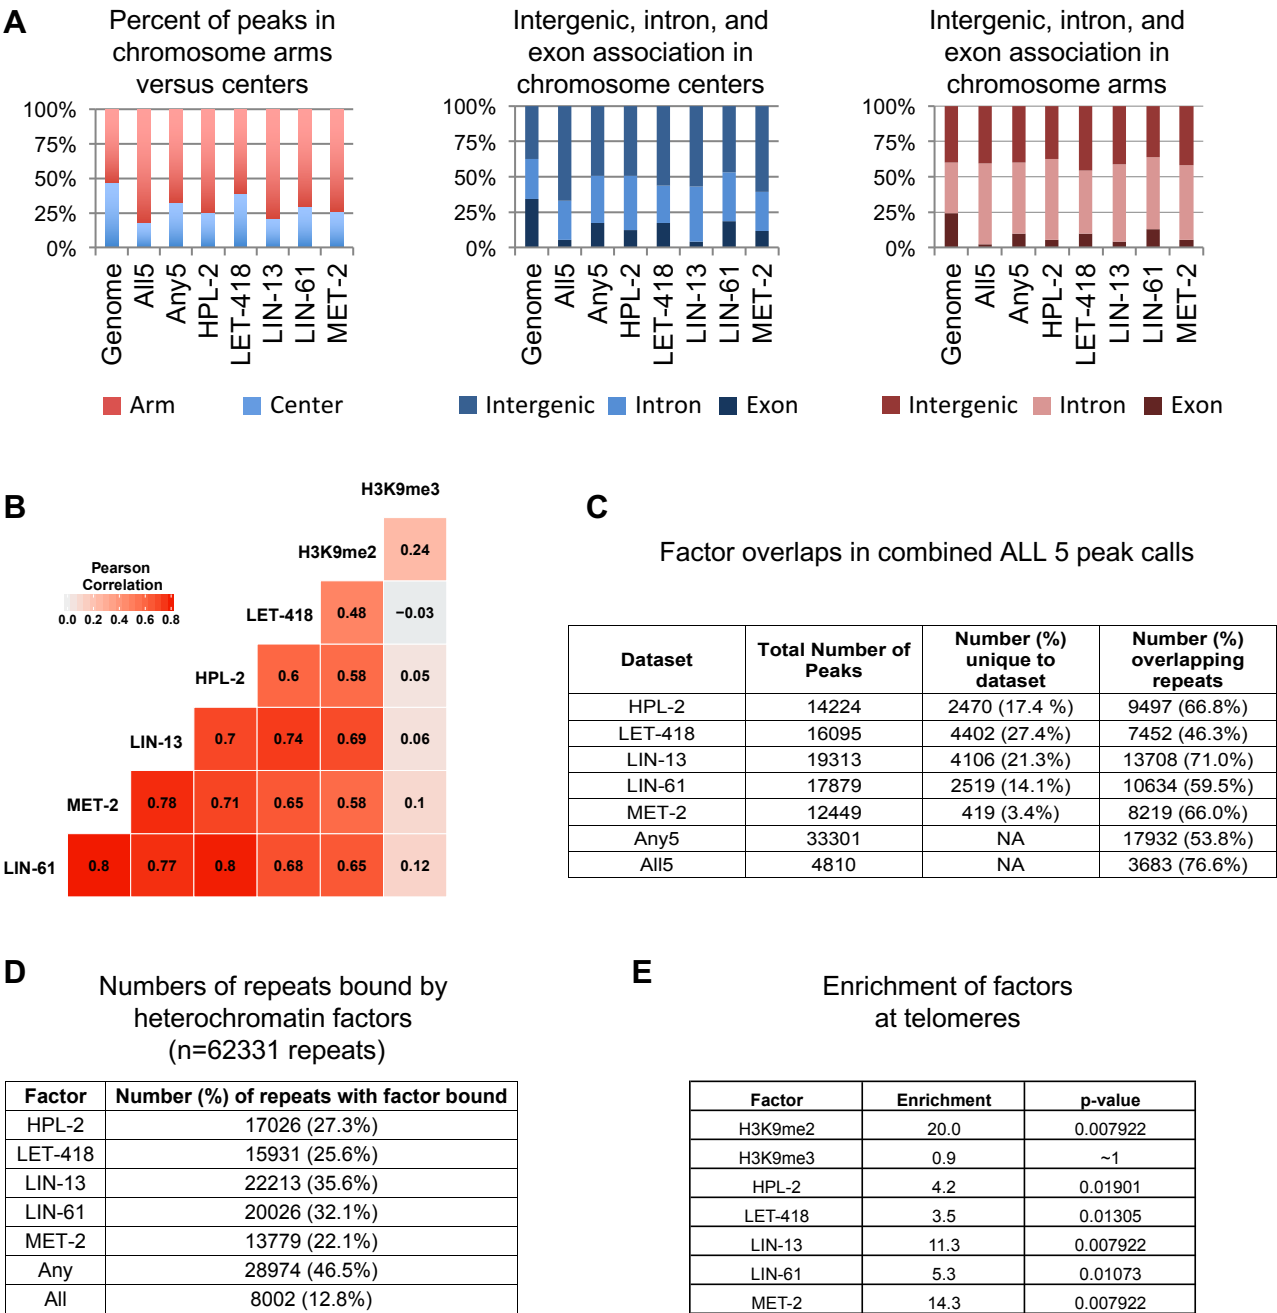

Supplement: supp [file elife-21666-supp-v1.zip › elife_poa_e21666_Figure_2_figure_supplement_1.pdf]

## Enrichment of MET-2 at repeat families

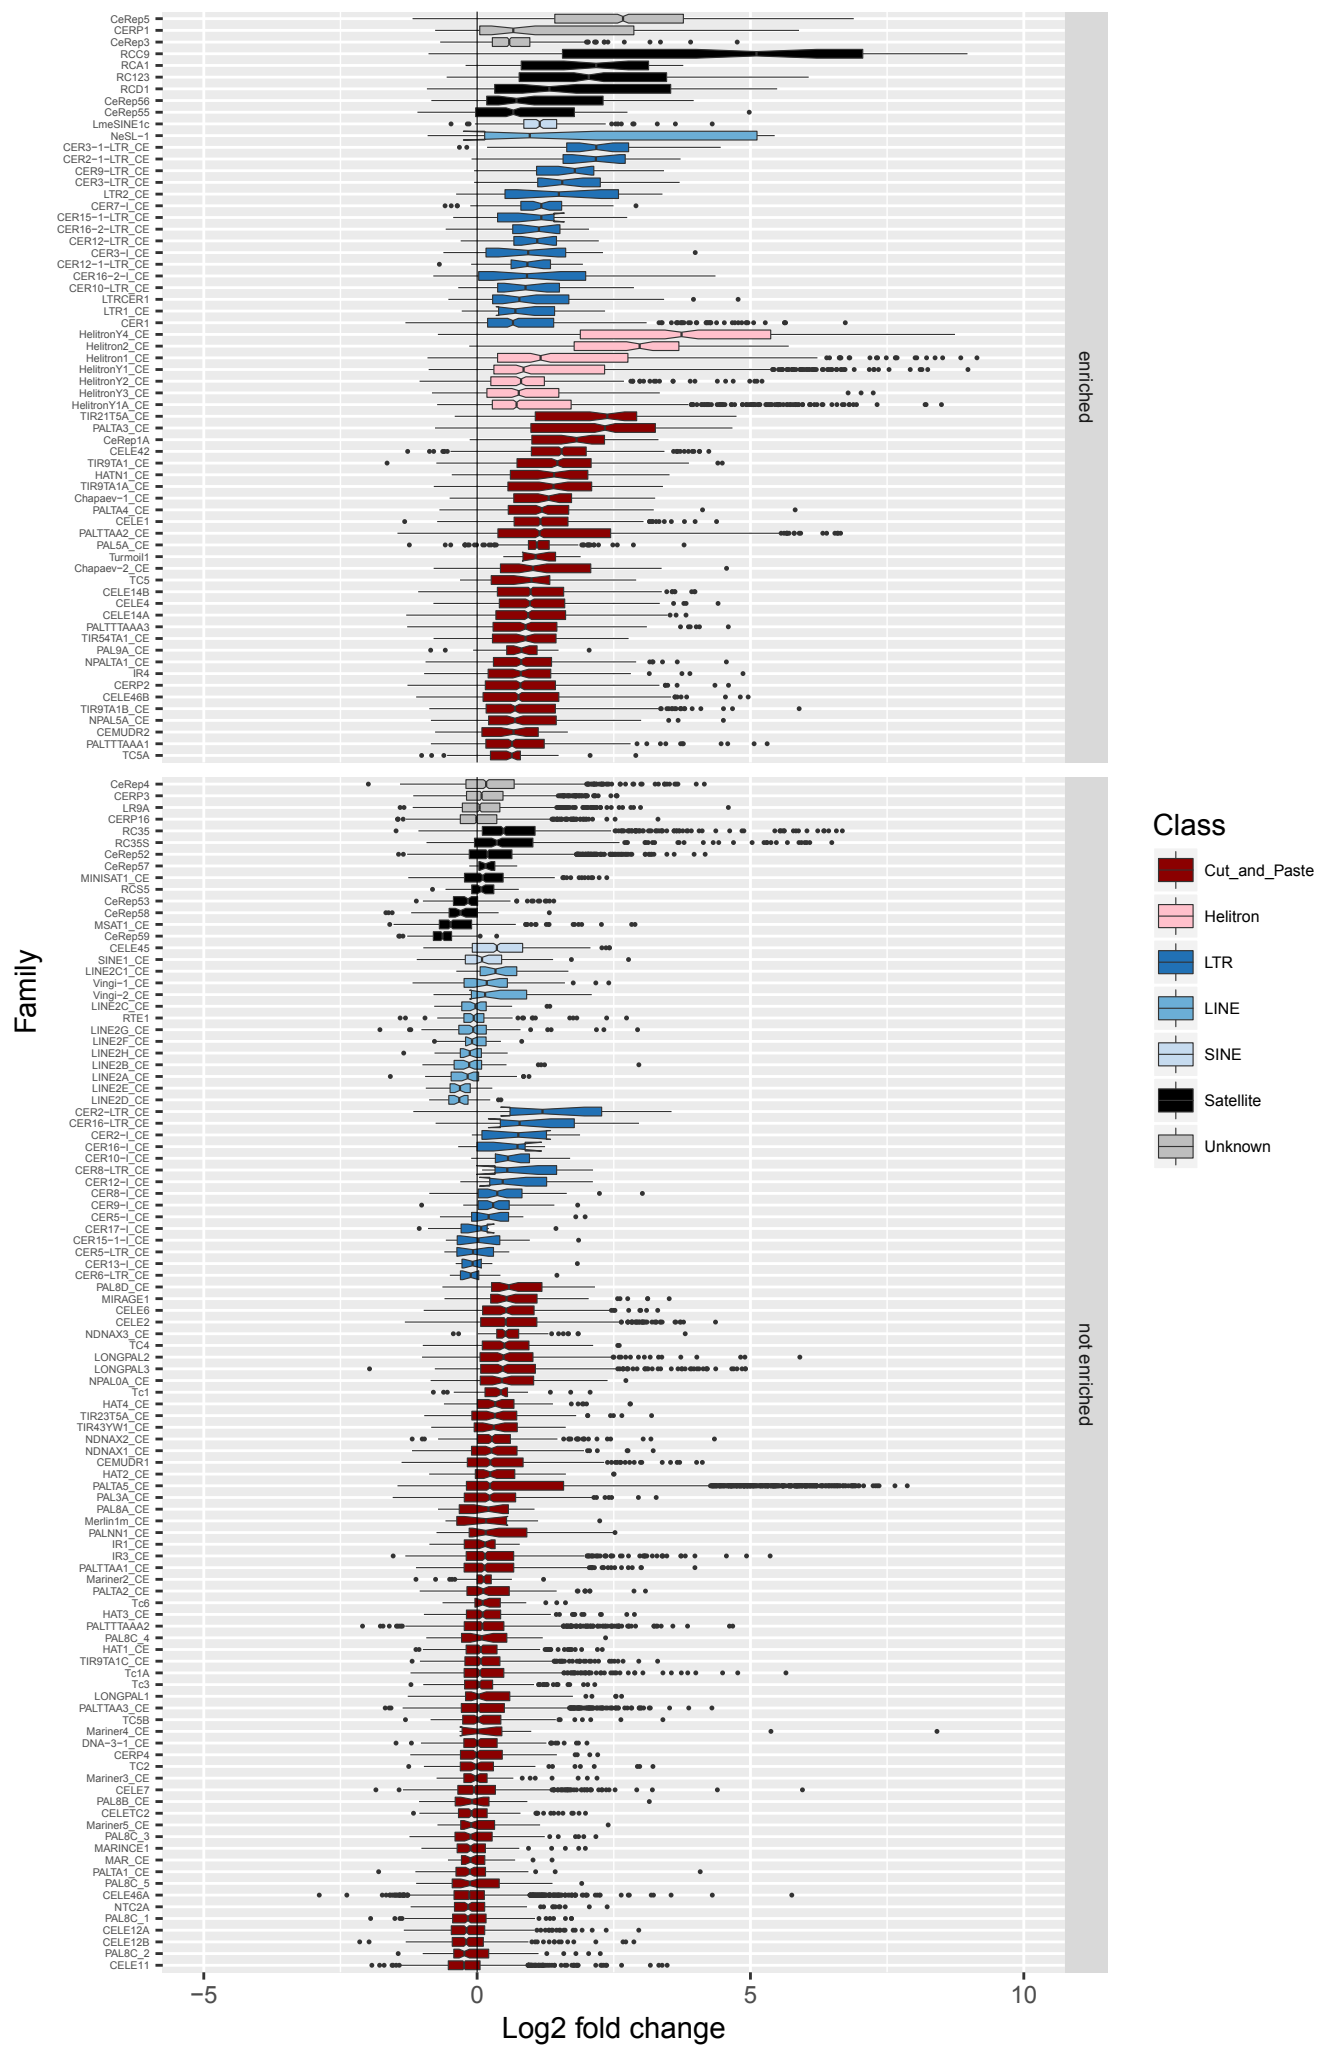

Supplement: supp [file elife-21666-supp-v1.zip › elife_poa_e21666_Figure_2_figure_supplement_4.pdf]

Figure 7-figure supplement 1

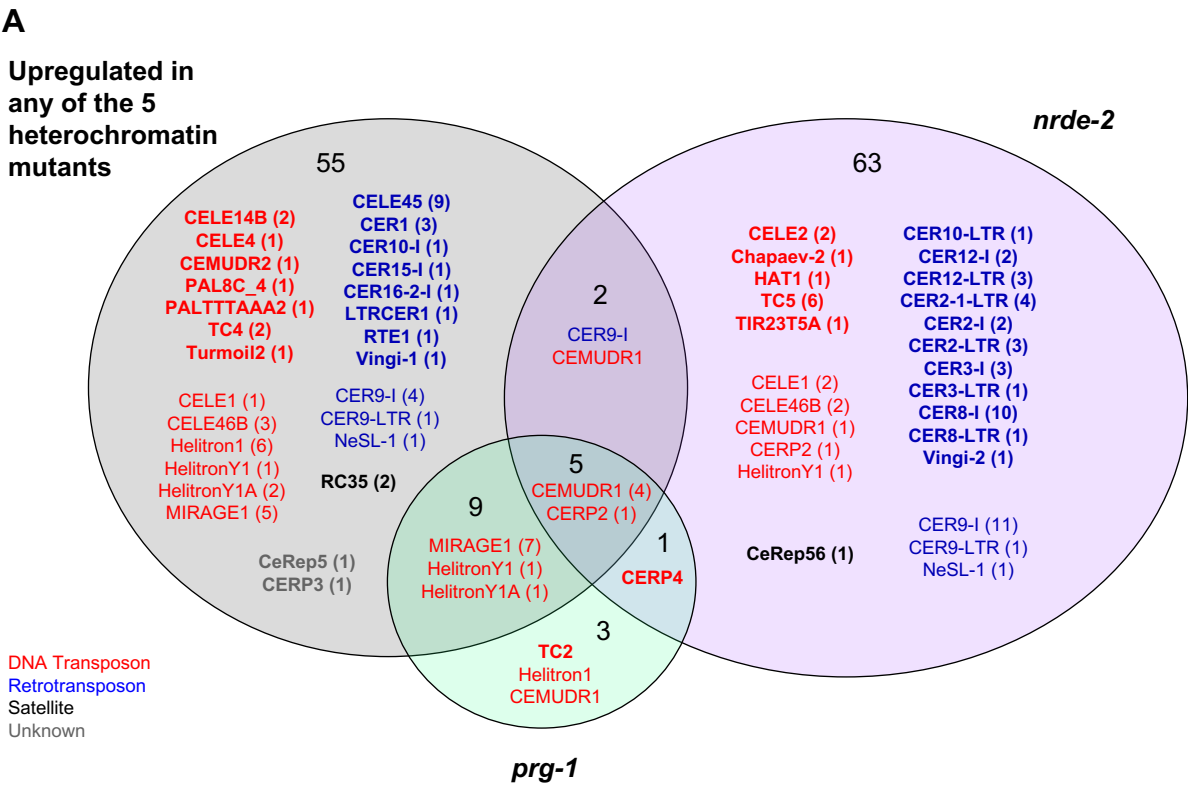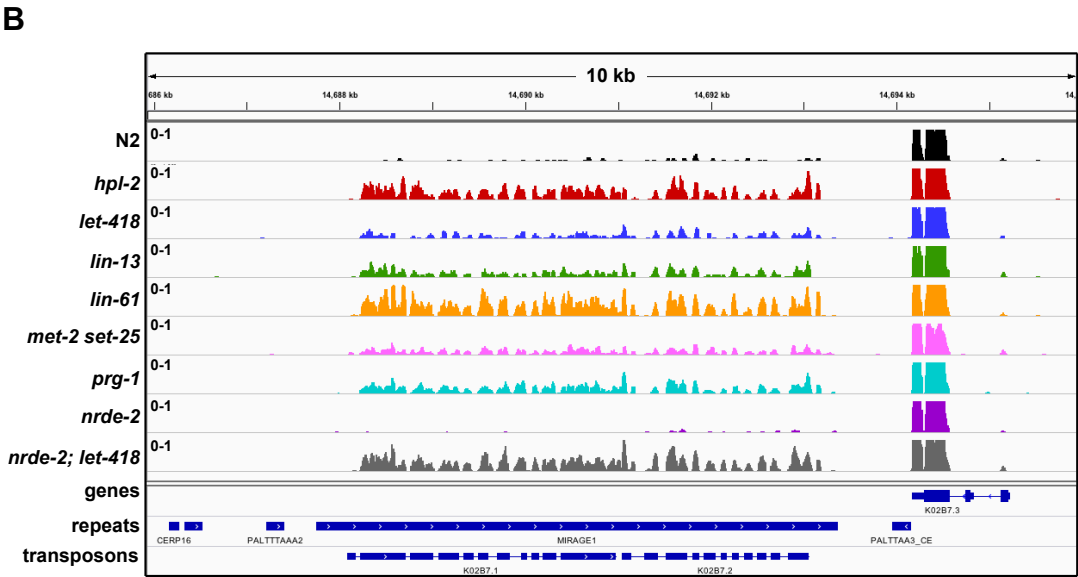

Supplement: supp [file elife-21666-supp-v1.zip › elife_poa_e21666_Figure_7_figure_supplement_1.pdf]

Enrichment of LIN-61 at repeat families

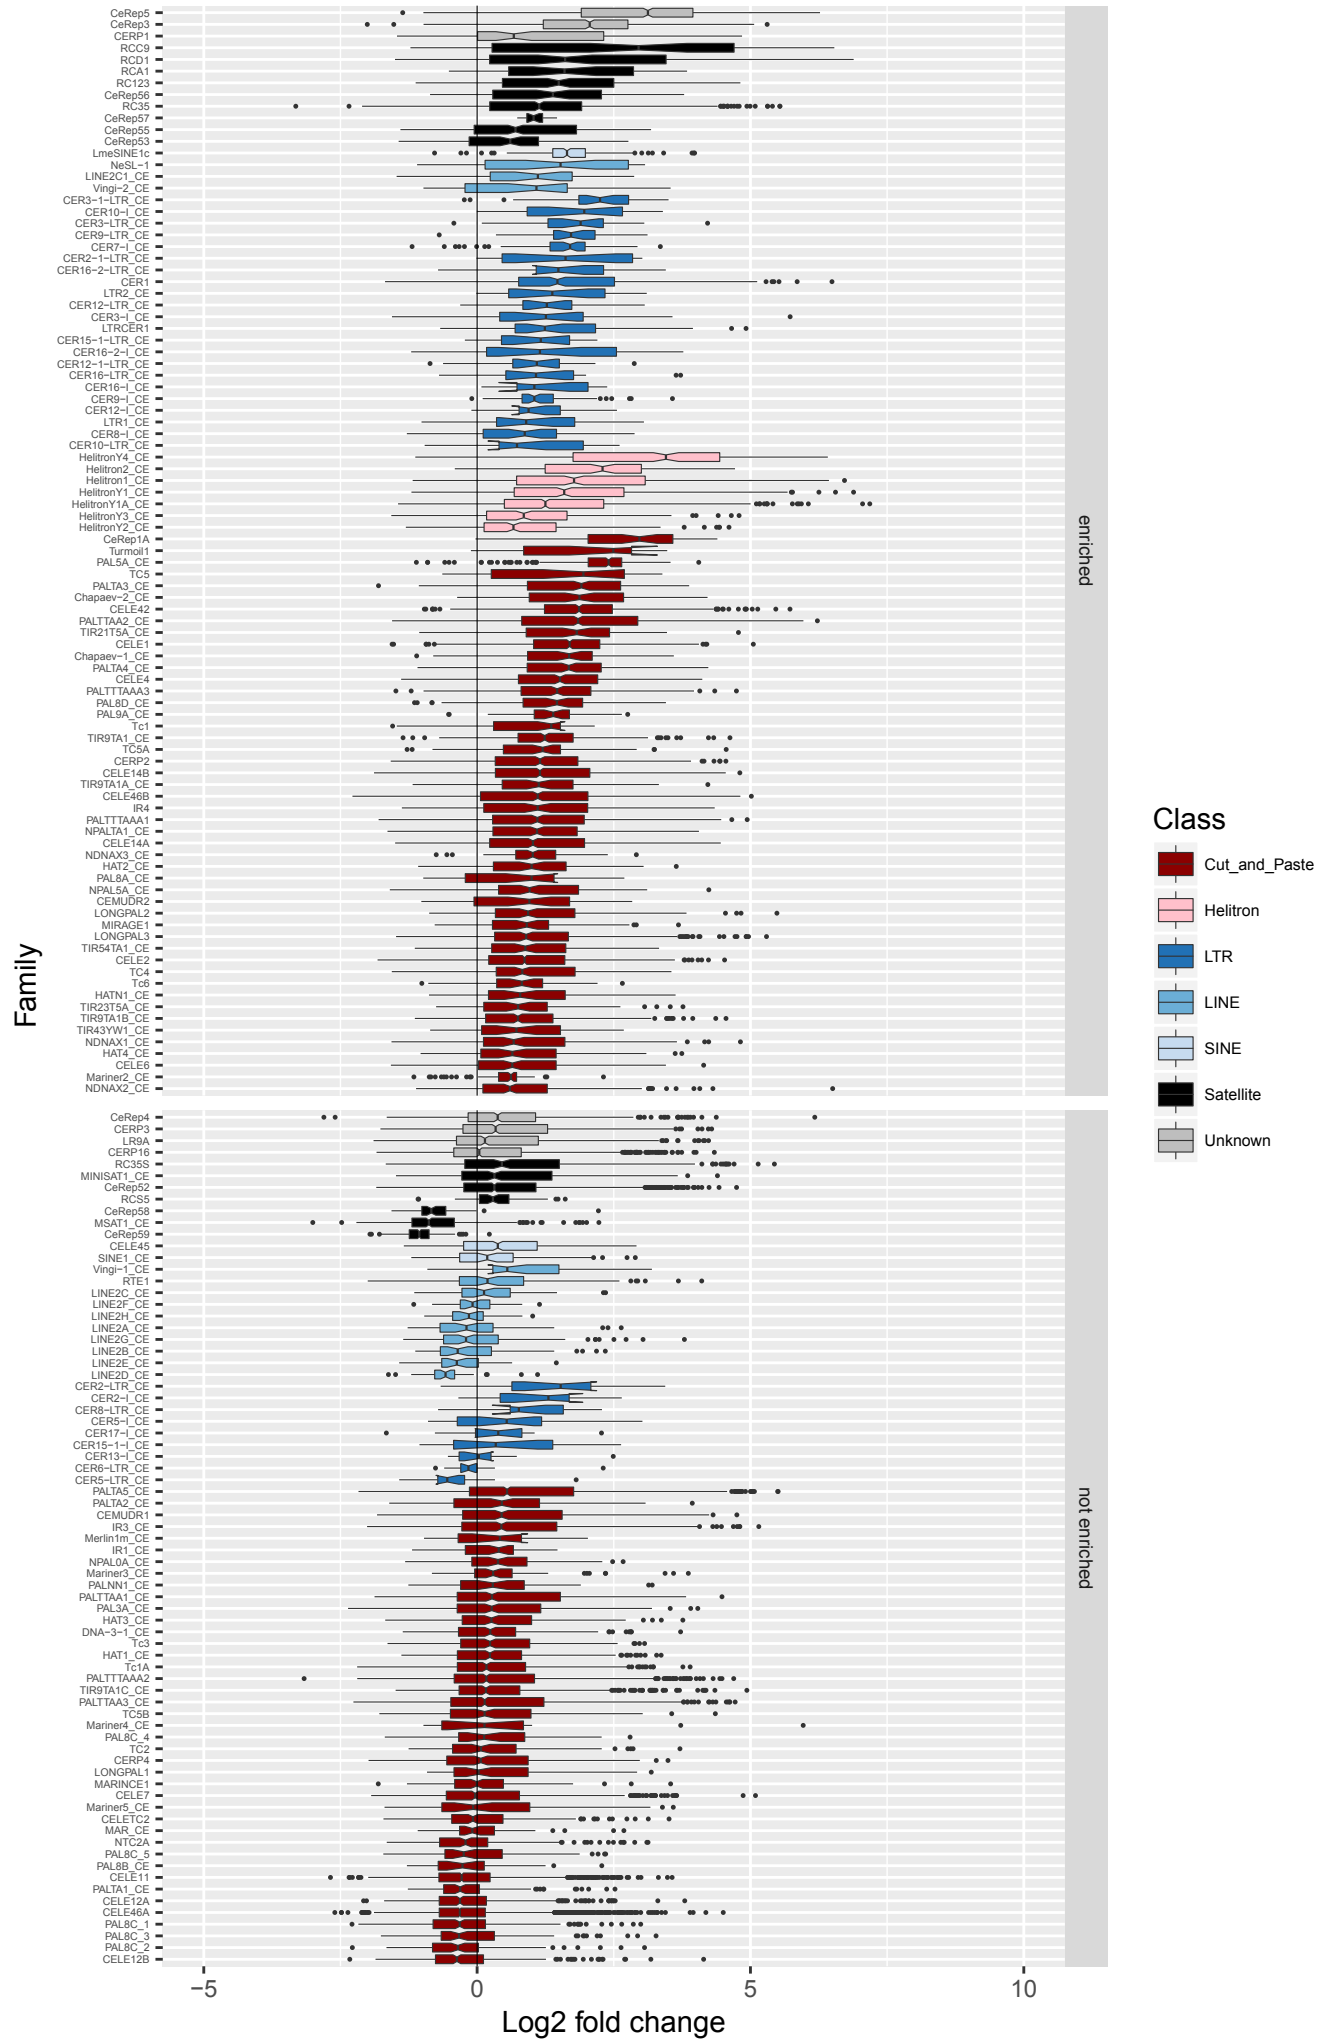

Supplement: supp [file elife-21666-supp-v1.zip]
